# Supplementary material for: Metabolite exchange between microbiome members produces compounds that influence Drosophila behavior
Source: eLife. 2017 Jan 9;6:e18855. doi: 10.7554/eLife.18855 (PMC5222558; doi:10.7554/eLife.18855)
Supplement: Figure 1—figure supplement 1—source data 1. — DOI: http://dx.doi.org/10.7554/eLife.18855.008 [file elife-18855-fig1-figsupp1-data1.xlsx]

## Sheet: Exp1
Experiment #	Fly Strain	Test Arm	Control Arm	Test Side	Time_Experiment	Center Flies	Experiment #	Left Arm	Right Arm	Left Side RI	Test Arm	Control Arm	Test Arm RI
1	Canton-S (WT)	Mock	Mock	L	12:30:00	11	1	28	31	-0.0428571	28	31	-0.0428571	0.0061748
2	Canton-S (WT)	Mock	Mock	R	12:35:00	14	2	24	27	-0.0461538	27	24	0.0461538
3	Canton-S (WT)	Mock	Mock	L	12:40:00	11	3	28	18	0.175439	28	18	0.175439
4	Canton-S (WT)	Mock	Mock	R	12:45:00	14	4	31	36	-0.0617284	36	31	0.0617284
5	Canton-S (WT)	ACV (25%)	Water	L	12:50:00	3	5	45	5	0.754717	45	5	0.754717	0.70549
6	Canton-S (WT)	ACV (25%)	Water	R	12:55:00	4	6	12	42	-0.517241	42	12	0.517241
7	Canton-S (WT)	ACV (25%)	Water	L	13:00:00	2	7	55	7	0.75	55	7	0.75
8	Canton-S (WT)	ACV (25%)	Water	R	13:05:00	4	8	4	52	-0.8	52	4	0.8
9	Canton-S (WT)	Benzaldehyde (-2)	Paraffin Oil	L	13:10:00	11	9	9	21	-0.292683	9	21	-0.292683	-0.627863
10	Canton-S (WT)	Benzaldehyde (-2)	Paraffin Oil	R	13:15:00	4	10	56	6	0.757576	6	56	-0.757576
11	Canton-S (WT)	Benzaldehyde (-2)	Paraffin Oil	L	13:20:00	2	11	7	58	-0.761194	7	58	-0.761194
12	Canton-S (WT)	Benzaldehyde (-2)	Paraffin Oil	R	13:25:00	4	12	49	7	0.7	7	49	-0.7
13	Canton-S (WT)	S. cerevisiae (10ul)	AJM	L	14:00:00	15	13	28	16	0.20339	28	16	0.20339	0.163692
14	Canton-S (WT)	S. cerevisiae (10ul)	AJM	R	14:05:00	11	14	22	36	-0.202899	36	22	0.202899
15	Canton-S (WT)	S. cerevisiae (10ul)	AJM	L	14:10:00	7	15	25	15	0.212766	25	15	0.212766
16	Canton-S (WT)	S. cerevisiae (10ul)	AJM	R	14:15:00	6	16	24	26	-0.0357143	26	24	0.0357143
17	Canton-S (WT)	S. cerevisiae (5ul)	AJM	L	14:20:00	5	17	37	17	0.338983	37	17	0.338983	0.319176
18	Canton-S (WT)	S. cerevisiae (5ul)	AJM	R	14:25:00	6	18	18	36	-0.3	36	18	0.3
19	Canton-S (WT)	S. cerevisiae (5ul)	AJM	L	14:30:00	13	19	34	10	0.421053	34	10	0.421053
20	Canton-S (WT)	S. cerevisiae (5ul)	AJM	R	14:35:00	11	20	18	31	-0.216667	31	18	0.216667
21	Canton-S (WT)	S. cerevisiae (2.5ul)	AJM	L	14:40:00	13	21	27	9	0.367347	27	9	0.367347	0.329604
22	Canton-S (WT)	S. cerevisiae (2.5ul)	AJM	R	14:45:00	7	22	12	26	-0.311111	26	12	0.311111
23	Canton-S (WT)	S. cerevisiae (2.5ul)	AJM	L	14:50:00	7	23	27	24	0.0517241	27	24	0.0517241
24	Canton-S (WT)	S. cerevisiae (2.5ul)	AJM	R	14:55:00	9	24	6	36	-0.588235	36	6	0.588235
25	Canton-S (WT)	S. cerevisiae (0.5ul)	AJM	L	15:00:00	11	25	28	19	0.155172	28	19	0.155172	0.276647
26	Canton-S (WT)	S. cerevisiae (0.5ul)	AJM	R	15:05:00	8	26	25	42	-0.226667	42	25	0.226667
27	Canton-S (WT)	S. cerevisiae (0.5ul)	AJM	L	15:10:00	14	27	38	19	0.267606	38	19	0.267606
28	Canton-S (WT)	S. cerevisiae (0.5ul)	AJM	R	15:15:00	12	28	13	45	-0.457143	45	13	0.457143
29	Canton-S (WT)	A. malorum (10ul)	AJM	L	15:45:00	6	29	32	13	0.372549	32	13	0.372549	0.197972
30	Canton-S (WT)	A.malorum (10ul)	AJM	R	15:50:00	7	30	22	32	-0.163934	32	22	0.163934
31	Canton-S (WT)	A.malorum (10ul)	AJM	L	15:55:00	8	31	31	20	0.186441	31	20	0.186441
32	Canton-S (WT)	A.malorum (10ul)	AJM	R	16:00:00	8	32	23	27	-0.0689655	27	23	0.0689655
33	Canton-S (WT)	A. malorum (5ul)	AJM	L	16:05:00	9	33	29	11	0.367347	29	11	0.367347	0.277442
34	Canton-S (WT)	A. malorum (5ul)	AJM	R	16:10:00	9	34	16	33	-0.293103	33	16	0.293103
35	Canton-S (WT)	A. malorum (5ul)	AJM	L	16:15:00		35			#DIV/0!	0	0
36	Canton-S (WT)	A. malorum (5ul)	AJM	R	16:20:00	7	36	23	34	-0.171875	34	23	0.171875
37	Canton-S (WT)	A. malorum (2.5ul)	AJM	L	16:25:00	10	37	25	21	0.0714286	25	21	0.0714286	0.152581
38	Canton-S (WT)	A. malorum (2.5ul)	AJM	R	16:30:00	7	38	20	37	-0.265625	37	20	0.265625
39	Canton-S (WT)	A. malorum (2.5ul)	AJM	L	16:35:00	3	39	31	24	0.12069	31	24	0.12069
40	Canton-S (WT)	A. malorum (2.5ul)	AJM	R	16:40:00		40			#DIV/0!	0	0	#DIV/0!
41	Canton-S (WT)	A. malorum (0.5ul)	AJM	L	16:45:00	7	41	30	18	0.218182	30	18	0.218182	0.111973
42	Canton-S (WT)	A. malorum (0.5ul)	AJM	R	16:50:00	5	42	29	23	0.105263	23	29	-0.105263
43	Canton-S (WT)	A. malorum (0.5ul)	AJM	L	16:55:00	5	43	26	15	0.23913	26	15	0.23913
44	Canton-S (WT)	A. malorum (0.5ul)	AJM	R	17:00:00	5	44	29	28	0.016129	28	29	-0.016129

## Sheet: Exp2
Experiment #	Fly Strain	Test Arm	Control Arm	Test Side	Time_Experiment	Center Flies	Experiment #	Left Arm	Right Arm	Left Side RI	Test Arm	Control Arm	Test Arm RI
1	Canton-S (WT)	Mock	Mock	L	12:30:00	11	1	20	17	0.0625	20	17	0.0625	0.114569
2	Canton-S (WT)	Mock	Mock	R	12:35:00	5	2	29	16	0.26	16	29	-0.26	-0.0644508
3	Canton-S (WT)	Mock	Mock	L	12:40:00	11	3	22	20	0.0377358	22	20	0.0377358
4	Canton-S (WT)	Mock	Mock	R	12:45:00	14	4	21	16	0.0980392	16	21	-0.0980392
5	Canton-S (WT)	ACV (25%)	Water	L	12:50:00	3	5	36	9	0.5625	36	9	0.5625	0.601855
6	Canton-S (WT)	ACV (25%)	Water	R	12:55:00	7	6	6	35	-0.604167	35	6	0.604167
7	Canton-S (WT)	ACV (25%)	Water	L	13:00:00	1	7	35	8	0.613636	35	8	0.613636
8	Canton-S (WT)	ACV (25%)	Water	R	13:05:00	6	8	8	45	-0.627119	45	8	0.627119
9	Canton-S (WT)	Benzaldehyde (-2)	Paraffin Oil	L	13:10:00	15	9	4	47	-0.651515	4	47	-0.651515	-0.596581
10	Canton-S (WT)	Benzaldehyde (-2)	Paraffin Oil	R	13:15:00	12	10	24	4	0.5	4	24	-0.5
11	Canton-S (WT)	Benzaldehyde (-2)	Paraffin Oil	L	13:20:00	8	11	3	30	-0.658537	3	30	-0.658537
12	Canton-S (WT)	Benzaldehyde (-2)	Paraffin Oil	R	13:25:00	5	12	44	10	0.576271	10	44	-0.576271
13	Canton-S (WT)	S. cerevisiae (10ul)	AJM	L	14:00:00	9	13	39	11	0.474576	39	11	0.474576	0.264376
14	Canton-S (WT)	S. cerevisiae (10ul)	AJM	R	14:05:00	13	14	16	17	-0.0217391	17	16	0.0217391
15	Canton-S (WT)	S. cerevisiae (10ul)	AJM	L	14:10:00	8	15	23	21	0.0384615	23	21	0.0384615
16	Canton-S (WT)	S. cerevisiae (10ul)	AJM	R	14:15:00	9	16	6	29	-0.522727	29	6	0.522727
17	Canton-S (WT)	S. cerevisiae (5ul)	AJM	L	14:20:00	5	17	31	9	0.488889	31	9	0.488889	0.258829
18	Canton-S (WT)	S. cerevisiae (5ul)	AJM	R	14:25:00	6	18	12	24	-0.285714	24	12	0.285714
19	Canton-S (WT)	S. cerevisiae (5ul)	AJM	L	14:30:00	11	19	27	18	0.160714	27	18	0.160714
20	Canton-S (WT)	S. cerevisiae (5ul)	AJM	R	14:35:00	7	20	19	24	-0.1	24	19	0.1
21	Canton-S (WT)	S. cerevisiae (2.5ul)	AJM	L	14:40:00	6	21	29	8	0.488372	29	8	0.488372	0.355524
22	Canton-S (WT)	S. cerevisiae (2.5ul)	AJM	R	14:45:00	7	22	13	30	-0.34	30	13	0.34
23	Canton-S (WT)	S. cerevisiae (2.5ul)	AJM	L	14:50:00	6	23	29	15	0.28	29	15	0.28
24	Canton-S (WT)	S. cerevisiae (2.5ul)	AJM	R	14:55:00	13	24	11	27	-0.313725	27	11	0.313725
25	Canton-S (WT)	S. cerevisiae (0.5ul)	AJM	L	15:00:00	4	25	41	19	0.34375	41	19	0.34375	0.286006
26	Canton-S (WT)	S. cerevisiae (0.5ul)	AJM	R	15:05:00	2	26	30	29	0.0163934	29	30	-0.0163934
27	Canton-S (WT)	S. cerevisiae (0.5ul)	AJM	L	15:10:00	10	27	36	14	0.366667	36	14	0.366667
28	Canton-S (WT)	S. cerevisiae (0.5ul)	AJM	R	15:15:00	7	28	13	40	-0.45	40	13	0.45
29	Canton-S (WT)	A. malorum (10ul)	AJM	L	15:45:00	7	29	30	24	0.0983607	30	24	0.0983607	0.238127
30	Canton-S (WT)	A.malorum (10ul)	AJM	R	15:50:00	4	30	20	28	-0.153846	28	20	0.153846
31	Canton-S (WT)	A.malorum (10ul)	AJM	L	15:55:00	5	31	43	14	0.467742	43	14	0.467742
32	Canton-S (WT)	A.malorum (10ul)	AJM	R	16:00:00	3	32	15	25	-0.232558	25	15	0.232558
33	Canton-S (WT)	A. malorum (5ul)	AJM	L	16:05:00	12	33	36	28	0.105263	36	28	0.105263	0.204029
34	Canton-S (WT)	A. malorum (5ul)	AJM	R	16:10:00	6	34	24	37	-0.19403	37	24	0.19403
35	Canton-S (WT)	A. malorum (5ul)	AJM	L	16:15:00	7	35	29	18	0.203704	29	18	0.203704
36	Canton-S (WT)	A. malorum (5ul)	AJM	R	16:20:00	5	36	22	28	-0.109091	28	22	0.109091
37	Canton-S (WT)	A. malorum (2.5ul)	AJM	L	16:25:00		37			#DIV/0!	0	0	#DIV/0!	0.134192
38	Canton-S (WT)	A. malorum (2.5ul)	AJM	R	16:30:00	6	38	18	31	-0.236364	31	18	0.236364
39	Canton-S (WT)	A. malorum (2.5ul)	AJM	L	16:35:00	7	39	29	23	0.101695	29	23	0.101695
40	Canton-S (WT)	A. malorum (2.5ul)	AJM	R	16:40:00	8	40	25	29	-0.0645161	29	25	0.0645161
41	Canton-S (WT)	A. malorum (0.5ul)	AJM	L	16:45:00		41			#DIV/0!	0	0	#DIV/0!	#DIV/0!
42	Canton-S (WT)	A. malorum (0.5ul)	AJM	R	16:50:00	5	42	21	26	-0.0961538	26	21	0.0961538
43	Canton-S (WT)	A. malorum (0.5ul)	AJM	L	16:55:00	11	43	31	22	0.140625	31	22	0.140625
44	Canton-S (WT)	A. malorum (0.5ul)	AJM	R	17:00:00	5	44	19	16	0.075	16	19	-0.075

## Sheet: Exp3
Experiment #	Fly Strain	Test Arm	Control Arm	Test Side	Time_Experiment	Center Flies	Experiment #	Left Arm	Right Arm	Left Side RI	Test Arm	Control Arm	Test Arm RI
1	Canton-S (WT)	Mock	Mock	L	12:30:00	11	1	25	28	-0.046875	25	28	-0.046875	0.109919
2	Canton-S (WT)	Mock	Mock	R	12:35:00	16	2	22	16	0.111111	16	22	-0.111111	-0.0333562
3	Canton-S (WT)	Mock	Mock	L	12:40:00	16	3	31	18	0.2	31	18	0.2
4	Canton-S (WT)	Mock	Mock	R	12:45:00	11	4	28	18	0.175439	18	28	-0.175439
5	Canton-S (WT)	ACV (25%)	Water	L	12:50:00	1	5	51	11	0.634921	51	11	0.634921	0.584936
6	Canton-S (WT)	ACV (25%)	Water	R	12:55:00	2	6	17	53	-0.5	53	17	0.5
7	Canton-S (WT)	ACV (25%)	Water	L	13:00:00	3	7	49	7	0.711864	49	7	0.711864
8	Canton-S (WT)	ACV (25%)	Water	R	13:05:00	2	8	17	52	-0.492958	52	17	0.492958
9	Canton-S (WT)	Benzaldehyde (-2)	Paraffin Oil	L	13:10:00	5	9	6	58	-0.753623	6	58	-0.753623	-0.634239
10	Canton-S (WT)	Benzaldehyde (-2)	Paraffin Oil	R	13:15:00	11	10	49	9	0.57971	9	49	-0.57971
11	Canton-S (WT)	Benzaldehyde (-2)	Paraffin Oil	L	13:20:00	12	11	11	58	-0.580247	11	58	-0.580247
12	Canton-S (WT)	Benzaldehyde (-2)	Paraffin Oil	R	13:25:00	15	12	55	7	0.623377	7	55	-0.623377
13	Canton-S (WT)	S. cerevisiae (10ul)	AJM	L	14:00:00	4	13	50	14	0.529412	50	14	0.529412	0.347054
14	Canton-S (WT)	S. cerevisiae (10ul)	AJM	R	14:05:00	6	14	14	36	-0.392857	36	14	0.392857
15	Canton-S (WT)	S. cerevisiae (10ul)	AJM	L	14:10:00	6	15	26	24	0.0357143	26	24	0.0357143
16	Canton-S (WT)	S. cerevisiae (10ul)	AJM	R	14:15:00	11	16	19	56	-0.430233	56	19	0.430233
17	Canton-S (WT)	S. cerevisiae (5ul)	AJM	L	14:20:00	11	17	40	16	0.358209	40	16	0.358209	0.303994
18	Canton-S (WT)	S. cerevisiae (5ul)	AJM	R	14:25:00	5	18	28	47	-0.2375	47	28	0.2375
19	Canton-S (WT)	S. cerevisiae (5ul)	AJM	L	14:30:00	3	19	35	25	0.15873	35	25	0.15873
20	Canton-S (WT)	S. cerevisiae (5ul)	AJM	R	14:35:00	7	20	14	44	-0.461538	44	14	0.461538
21	Canton-S (WT)	S. cerevisiae (2.5ul)	AJM	L	14:40:00	5	21	42	27	0.202703	42	27	0.202703	0.351836
22	Canton-S (WT)	S. cerevisiae (2.5ul)	AJM	R	14:45:00	5	22	7	40	-0.634615	40	7	0.634615
23	Canton-S (WT)	S. cerevisiae (2.5ul)	AJM	L	14:50:00	8	23	38	20	0.272727	38	20	0.272727
24	Canton-S (WT)	S. cerevisiae (2.5ul)	AJM	R	14:55:00	10	24	21	43	-0.297297	43	21	0.297297
25	Canton-S (WT)	S. cerevisiae (0.5ul)	AJM	L	15:00:00	3	25	45	18	0.409091	45	18	0.409091	0.349371
26	Canton-S (WT)	S. cerevisiae (0.5ul)	AJM	R	15:05:00	4	26	12	47	-0.555556	47	12	0.555556
27	Canton-S (WT)	S. cerevisiae (0.5ul)	AJM	L	15:10:00	8	27	41	18	0.343284	41	18	0.343284
28	Canton-S (WT)	S. cerevisiae (0.5ul)	AJM	R	15:15:00	9	28	26	32	-0.0895522	32	26	0.0895522
29	Canton-S (WT)	A. malorum (10ul)	AJM	L	15:45:00	9	29	33	24	0.136364	33	24	0.136364	0.271135
30	Canton-S (WT)	A.malorum (10ul)	AJM	R	15:50:00	4	30	11	48	-0.587302	48	11	0.587302
31	Canton-S (WT)	A.malorum (10ul)	AJM	L	15:55:00	6	31	39	22	0.253731	39	22	0.253731
32	Canton-S (WT)	A.malorum (10ul)	AJM	R	16:00:00	6	32	22	28	-0.107143	28	22	0.107143
33	Canton-S (WT)	A. malorum (5ul)	AJM	L	16:05:00	8	33	35	19	0.258065	35	19	0.258065	0.220405
34	Canton-S (WT)	A. malorum (5ul)	AJM	R	16:10:00	2	34	17	32	-0.294118	32	17	0.294118
35	Canton-S (WT)	A. malorum (5ul)	AJM	L	16:15:00	6	35	31	19	0.214286	31	19	0.214286
36	Canton-S (WT)	A. malorum (5ul)	AJM	R	16:20:00	6	36	24	45	-0.28	45	24	0.28
37	Canton-S (WT)	A. malorum (5ul)	AJM	L	16:25:00	7	37	25	22	0.0555556	25	22	0.0555556
38	Canton-S (WT)	A. malorum (2.5ul)	AJM	L	16:25:00	1	38	41	24	0.257576	41	24	0.257576	0.148568
39	Canton-S (WT)	A. malorum (2.5ul)	AJM	R	16:30:00	7	39	21	33	-0.196721	33	21	0.196721
40	Canton-S (WT)	A. malorum (2.5ul)	AJM	L	16:35:00	7	40	32	18	0.245614	32	18	0.245614
41	Canton-S (WT)	A. malorum (2.5ul)	AJM	R	16:40:00	6	41	24	30	-0.1	30	24	0.1
42	Canton-S (WT)	A. malorum (2.5ul)	AJM	L	16:45:00	6	42	37	26	0.15942	37	26	0.15942
43	Canton-S (WT)	A. malorum (2.5ul)	AJM	R	16:50:00	5	43	21	32	-0.189655	32	21	0.189655
44	Canton-S (WT)	A. malorum (0.5ul)	AJM	L	16:45:00	9	44	31	14	0.314815	31	14	0.314815	0.130133
45	Canton-S (WT)	A. malorum (0.5ul)	AJM	R	16:50:00	6	45	25	32	-0.111111	32	25	0.111111
46	Canton-S (WT)	A. malorum (0.5ul)	AJM	L	16:55:00	8	46	44	29	0.185185	44	29	0.185185
47	Canton-S (WT)	A. malorum (0.5ul)	AJM	R	17:00:00	3	47	36	32	0.056338	32	36	-0.056338
48	Canton-S (WT)	A. malorum (0.5ul)	AJM	L	17:05:00	8	48	29	36	-0.0958904	36	29	0.0958904
