# Supplementary material for: Metabolite exchange between microbiome members produces compounds that influence Drosophila behavior
Source: eLife. 2017 Jan 9;6:e18855. doi: 10.7554/eLife.18855 (PMC5222558; doi:10.7554/eLife.18855)
Supplement: Figure 1—source data 1. — DOI: http://dx.doi.org/10.7554/eLife.18855.004 [file elife-18855-fig1-data1.xlsx]

## Sheet: Exp1
Experiment #	Test Arm	Control Arm	Test Side	Time_Experiment	Center Flies	Experiment #	Left Arm	Right Arm	Left Side RI	Test Arm	Control Arm	Test Arm RI
1	Mock (empty tube)	Mock (empty tube)	L	11:00:00	8	1	21	25	-0.0740741	21	25	-0.0740741	0.0348931
2	Y1 Saccharomyces cerevisiae (I112)	Apple Juice Liquid, 100%, pH ~5.3 + 0.5% YE	L	11:04:00	9	2	26	18	0.150943	26	18	0.150943	-0.00189214
3	Mock (empty tube)	Mock (empty tube)	R	11:08:00	15	3	28	14	0.245614	14	28	-0.245614	0.477031
4	Y1 Saccharomyces cerevisiae (I112)	Apple Juice Liquid, 100%, pH ~5.3 + 0.5% YE	R	11:12:00	2	4	11	35	-0.5	35	11	0.5
5	Mock (empty tube)	Mock (empty tube)	L	11:16:00	11	5	25	16	0.173077	25	16	0.173077
6	Y1 Saccharomyces cerevisiae (I112)	Apple Juice Liquid, 100%, pH ~5.3 + 0.5% YE	L	11:20:00	5	6	37	9	0.54902	37	9	0.54902
7	Mock (empty tube)	Mock (empty tube)	R	11:24:00	10	7	21	25	-0.0714286	25	21	0.0714286
8	Y1 Saccharomyces cerevisiae (I112)	Apple Juice Liquid, 100%, pH ~5.3 + 0.5% YE	R	11:28:00	0	8	9	41	-0.64	41	9	0.64
9	Mock (empty tube)	Mock (empty tube)	L	11:32:00	10	9	16	16	0	16	16	0
10	Y1 Saccharomyces cerevisiae (I112)	Apple Juice Liquid, 100%, pH ~5.3 + 0.5% YE	L	11:36:00	5	10	28	12	0.355556	28	12	0.355556
11	Mock (empty tube)	Mock (empty tube)	R	11:40:00	6	11	19	22	-0.0638298	22	19	0.0638298
12	Y1 Saccharomyces cerevisiae (I112)	Apple Juice Liquid, 100%, pH ~5.3 + 0.5% YE	R	11:44:00	2	12	6	34	-0.666667	34	6	0.666667
13	Y2 S. cerevisiae Y9	Apple Juice Liquid, 100%, pH ~5.3 + 0.5% YE	L	12:09:00	7	13	38	6	0.627451	38	6	0.627451	0.455466
14	Y3 S. cerevisiae YB-210	Apple Juice Liquid, 100%, pH ~5.3 + 0.5% YE	L	12:13:00	4	14	40	8	0.615385	40	8	0.615385	0.48497
15	Y2 S. cerevisiae Y9	Apple Juice Liquid, 100%, pH ~5.3 + 0.5% YE	R	12:17:00	2	15	8	33	-0.581395	33	8	0.581395
16	Y3 S. cerevisiae YB-210	Apple Juice Liquid, 100%, pH ~5.3 + 0.5% YE	R	12:21:00	4	16	12	35	-0.45098	35	12	0.45098
17	Y2 S. cerevisiae Y9	Apple Juice Liquid, 100%, pH ~5.3 + 0.5% YE	L	12:25:00	7	17	34	11	0.442308	34	11	0.442308
18	Y3 S. cerevisiae YB-210	Apple Juice Liquid, 100%, pH ~5.3 + 0.5% YE	L	12:29:00	7	18	32	19	0.224138	32	19	0.224138
19	Y2 S. cerevisiae Y9	Apple Juice Liquid, 100%, pH ~5.3 + 0.5% YE	R	12:33:00	7	19	14	31	-0.326923	31	14	0.326923
20	Y3 S. cerevisiae YB-210	Apple Juice Liquid, 100%, pH ~5.3 + 0.5% YE	R	12:37:00	6	20	7	42	-0.636364	42	7	0.636364
21	Y2 S. cerevisiae Y9	Apple Juice Liquid, 100%, pH ~5.3 + 0.5% YE	L	12:41:00	4	21	35	14	0.396226	35	14	0.396226
22	Y3 S. cerevisiae YB-210	Apple Juice Liquid, 100%, pH ~5.3 + 0.5% YE	L	12:45:00	4	22	32	8	0.545455	32	8	0.545455
23	Y2 S. cerevisiae Y9	Apple Juice Liquid, 100%, pH ~5.3 + 0.5% YE	R	12:49:00	4	23	15	34	-0.358491	34	15	0.358491
24	Y3 S. cerevisiae YB-210	Apple Juice Liquid, 100%, pH ~5.3 + 0.5% YE	R	12:53:00	4	24	7	21	-0.4375	21	7	0.4375
25	LAB7 Lactobacillus plantarum cs (B48)	Apple Juice Liquid, 100%, pH ~5.3 + 0.5% YE	L	13:18:00	12	25	21	30	-0.142857	21	30	-0.142857	0.0831545
26	LAB8 L. brevis_lab (B65)	Apple Juice Liquid, 100%, pH ~5.3 + 0.5% YE	L	13:22:00	8	26	23	26	-0.0526316	23	26	-0.0526316	-0.135591
27	LAB7 Lactobacillus plantarum cs (B48)	Apple Juice Liquid, 100%, pH ~5.3 + 0.5% YE	R	13:26:00	7	27	17	24	-0.145833	24	17	0.145833
28	LAB8 L. brevis_lab (B65)	Apple Juice Liquid, 100%, pH ~5.3 + 0.5% YE	R	13:30:00	5	28	26	18	0.163265	18	26	-0.163265
29	LAB7 Lactobacillus plantarum cs (B48)	Apple Juice Liquid, 100%, pH ~5.3 + 0.5% YE	L	13:34:00	5	29	28	16	0.244898	28	16	0.244898
30	LAB8 L. brevis_lab (B65)	Apple Juice Liquid, 100%, pH ~5.3 + 0.5% YE	L	13:38:00	9	30	18	22	-0.0816327	18	22	-0.0816327
31	LAB7 Lactobacillus plantarum cs (B48)	Apple Juice Liquid, 100%, pH ~5.3 + 0.5% YE	R	13:42:00	9	31	18	19	-0.0217391	19	18	0.0217391
32	LAB8 L. brevis_lab (B65)	Apple Juice Liquid, 100%, pH ~5.3 + 0.5% YE	R	13:46:00	6	32	21	25	-0.0769231	25	21	0.0769231
33	LAB7 Lactobacillus plantarum cs (B48)	Apple Juice Liquid, 100%, pH ~5.3 + 0.5% YE	L	13:50:00	4	33	25	20	0.102041	25	20	0.102041
34	LAB8 L. brevis_lab (B65)	Apple Juice Liquid, 100%, pH ~5.3 + 0.5% YE	L	13:54:00	4	34	21	23	-0.0416667	21	23	-0.0416667
35	LAB7 Lactobacillus plantarum cs (B48)	Apple Juice Liquid, 100%, pH ~5.3 + 0.5% YE	R	13:58:00	10	35	19	26	-0.127273	26	19	0.127273
36	LAB8 L. brevis_lab (B65)	Apple Juice Liquid, 100%, pH ~5.3 + 0.5% YE	R	14:02:00	8	36	26	4	0.578947	4	26	-0.578947
37	LAB10 L. brevis_wild (B135)	Apple Juice Liquid, 100%, pH ~5.3 + 0.5% YE	L	14:27:00	8	37	16	35	-0.322034	16	35	-0.322034	-0.138386
38	LAB 11 Leuconostoc sp_Fabian	Apple Juice Liquid, 100%, pH ~5.3 + 0.5% YE	L	14:31:00	7	38	20	26	-0.113208	20	26	-0.113208	-0.0615416
39	LAB10 L. brevis_wild (B135)	Apple Juice Liquid, 100%, pH ~5.3 + 0.5% YE	R	14:35:00	6	39	28	22	0.107143	22	28	-0.107143
40	LAB 11 Leuconostoc sp_Fabian	Apple Juice Liquid, 100%, pH ~5.3 + 0.5% YE	R	14:39:00	2	40	30	15	0.319149	15	30	-0.319149
41	LAB10 L. brevis_wild (B135)	Apple Juice Liquid, 100%, pH ~5.3 + 0.5% YE	L	14:43:00		41			#DIV/0!	0	0	#DIV/0!
42	LAB 11 Leuconostoc sp_Fabian	Apple Juice Liquid, 100%, pH ~5.3 + 0.5% YE	L	14:47:00	5	42	17	21	-0.0930233	17	21	-0.0930233
43	LAB10 L. brevis_wild (B135)	Apple Juice Liquid, 100%, pH ~5.3 + 0.5% YE	R	14:51:00	5	43	27	17	0.204082	17	27	-0.204082
44	LAB 11 Leuconostoc sp_Fabian	Apple Juice Liquid, 100%, pH ~5.3 + 0.5% YE	R	14:55:00	5	44	21	20	0.0217391	20	21	-0.0217391
45	LAB10 L. brevis_wild (B135)	Apple Juice Liquid, 100%, pH ~5.3 + 0.5% YE	L	14:59:00	6	45	24	18	0.125	24	18	0.125
46	LAB 11 Leuconostoc sp_Fabian	Apple Juice Liquid, 100%, pH ~5.3 + 0.5% YE	L	15:03:00	5	46	28	26	0.0338983	28	26	0.0338983
47	LAB10 L. brevis_wild (B135)	Apple Juice Liquid, 100%, pH ~5.3 + 0.5% YE	R	15:07:00	4	47	27	18	0.183673	18	27	-0.183673
48	LAB 11 Leuconostoc sp_Fabian	Apple Juice Liquid, 100%, pH ~5.3 + 0.5% YE	R	15:11:00	5	48	22	17	0.113636	17	22	-0.113636
49	AAB18 Acetobacter pasteurianus_lab (B50)	Apple Juice Liquid, 100%, pH ~5.3 + 0.5% YE	L	#REF!	2	49	28	17	0.234043	28	17	0.234043	0.0961401
50	AAB19 A. cerevisiae (B74)	Apple Juice Liquid, 100%, pH ~5.3 + 0.5% YE	L	#REF!	9	50	27	29	-0.0307692	27	29	-0.0307692	0.288495
51	AAB18 Acetobacter pasteurianus_lab (B50)	Apple Juice Liquid, 100%, pH ~5.3 + 0.5% YE	R	#REF!	2	51	22	26	-0.08	26	22	0.08
52	AAB19 A. cerevisiae (B74)	Apple Juice Liquid, 100%, pH ~5.3 + 0.5% YE	R	#REF!	2	52	14	35	-0.411765	35	14	0.411765
53	AAB18 Acetobacter pasteurianus_lab (B50)	Apple Juice Liquid, 100%, pH ~5.3 + 0.5% YE	L	#REF!	1	53	24	14	0.25641	24	14	0.25641
54	AAB19 A. cerevisiae (B74)	Apple Juice Liquid, 100%, pH ~5.3 + 0.5% YE	L	#REF!	8	54	33	19	0.233333	33	19	0.233333
55	AAB18 Acetobacter pasteurianus_lab (B50)	Apple Juice Liquid, 100%, pH ~5.3 + 0.5% YE	R	#REF!	4	55	25	31	-0.1	31	25	0.1
56	AAB19 A. cerevisiae (B74)	Apple Juice Liquid, 100%, pH ~5.3 + 0.5% YE	R	#REF!	4	56	13	32	-0.387755	32	13	0.387755
57	AAB18 Acetobacter pasteurianus_lab (B50)	Apple Juice Liquid, 100%, pH ~5.3 + 0.5% YE	L	#REF!	11	57	34	19	0.234375	34	19	0.234375
58	AAB19 A. cerevisiae (B74)	Apple Juice Liquid, 100%, pH ~5.3 + 0.5% YE	L	#REF!	7	58	40	14	0.42623	40	14	0.42623
59	AAB18 Acetobacter pasteurianus_lab (B50)	Apple Juice Liquid, 100%, pH ~5.3 + 0.5% YE	R	#REF!	10	59	22	14	0.173913	14	22	-0.173913
60	AAB19 A. cerevisiae (B74)	Apple Juice Liquid, 100%, pH ~5.3 + 0.5% YE	R	#REF!	5	60	13	36	-0.425926	36	13	0.425926
61	AAB20 A. malorum (B95)	Apple Juice Liquid, 100%, pH ~5.3 + 0.5% YE	L	#REF!	4	61	35	26	0.138462	35	26	0.138462	0.239351
62	AAB21 A. indonensiensis (B117)	Apple Juice Liquid, 100%, pH ~5.3 + 0.5% YE	L	#REF!	X	62			#VALUE!	0	0	#VALUE!	0.186354
63	AAB20 A. malorum (B95)	Apple Juice Liquid, 100%, pH ~5.3 + 0.5% YE	R	#REF!	4	63	18	32	-0.259259	32	18	0.259259
64	AAB21 A. indonensiensis (B117)	Apple Juice Liquid, 100%, pH ~5.3 + 0.5% YE	R	#REF!	3	64	17	37	-0.350877	37	17	0.350877
65	AAB20 A. malorum (B95)	Apple Juice Liquid, 100%, pH ~5.3 + 0.5% YE	L	#REF!	3	65	34	12	0.44898	34	12	0.44898
66	AAB21 A. indonensiensis (B117)	Apple Juice Liquid, 100%, pH ~5.3 + 0.5% YE	L	#REF!	4	66	33	14	0.372549	33	14	0.372549
67	AAB20 A. malorum (B95)	Apple Juice Liquid, 100%, pH ~5.3 + 0.5% YE	R	#REF!	0	67	23	27	-0.08	27	23	0.08
68	AAB21 A. indonensiensis (B117)	Apple Juice Liquid, 100%, pH ~5.3 + 0.5% YE	R	#REF!	8	68	21	31	-0.166667	31	21	0.166667
69	AAB20 A. malorum (B95)	Apple Juice Liquid, 100%, pH ~5.3 + 0.5% YE	L	#REF!	4	69	24	16	0.181818	24	16	0.181818
70	AAB21 A. indonensiensis (B117)	Apple Juice Liquid, 100%, pH ~5.3 + 0.5% YE	L	#REF!	4	70	22	19	0.0666667	22	19	0.0666667
71	AAB20 A. malorum (B95)	Apple Juice Liquid, 100%, pH ~5.3 + 0.5% YE	R	#REF!	3	71	18	37	-0.327586	37	18	0.327586
72	AAB21 A. indonensiensis (B117)	Apple Juice Liquid, 100%, pH ~5.3 + 0.5% YE	R	#REF!	5	72	16	22	-0.139535	22	16	0.139535

## Sheet: Exp2
Experiment #	Test Arm	Control Arm	Test Side	Time_Experiment	Center Flies	Experiment #	Left Arm	Right Arm	Left Side RI	Test Arm	Control Arm	Test Arm RI
1	Mock (empty tube)	Mock (empty tube)	L	11:00:00	13	1	17	33	-0.253968	17	33	-0.253968	-0.0738142
2	Y1 Saccharomyces cerevisiae (I112)	Apple Juice Liquid, 100%, pH ~5.3 + 0.5% YE	L	11:04:00	10	2	31	15	0.285714	31	15	0.285714	0.0215655
3	Mock (empty tube)	Mock (empty tube)	R	11:08:00	10	3	24	27	-0.0491803	27	24	0.0491803	0.367927
4	Y1 Saccharomyces cerevisiae (I112)	Apple Juice Liquid, 100%, pH ~5.3 + 0.5% YE	R	11:12:00	4	4	10	40	-0.555556	40	10	0.555556
5	Mock (empty tube)	Mock (empty tube)	L	11:16:00	12	5	23	13	0.208333	23	13	0.208333
6	Y1 Saccharomyces cerevisiae (I112)	Apple Juice Liquid, 100%, pH ~5.3 + 0.5% YE	L	11:20:00	4	6	32	11	0.446809	32	11	0.446809
7	Mock (empty tube)	Mock (empty tube)	R	11:24:00	6	7	18	29	-0.207547	29	18	0.207547
8	Y1 Saccharomyces cerevisiae (I112)	Apple Juice Liquid, 100%, pH ~5.3 + 0.5% YE	R	11:28:00	2	8	22	32	-0.178571	32	22	0.178571
9	Mock (empty tube)	Mock (empty tube)	L	11:32:00	10	9	15	20	-0.111111	15	20	-0.111111
10	Y1 Saccharomyces cerevisiae (I112)	Apple Juice Liquid, 100%, pH ~5.3 + 0.5% YE	L	11:36:00	3	10	28	10	0.439024	28	10	0.439024
11	Mock (empty tube)	Mock (empty tube)	R	11:40:00	9	11	12	13	-0.0294118	13	12	0.0294118
12	Y1 Saccharomyces cerevisiae (I112)	Apple Juice Liquid, 100%, pH ~5.3 + 0.5% YE	R	11:44:00	7	12	15	31	-0.301887	31	15	0.301887
13	Y2 S. cerevisiae Y9	Apple Juice Liquid, 100%, pH ~5.3 + 0.5% YE	L	12:09:00	9	13	35	13	0.385965	35	13	0.385965	0.345865
14	Y3 S. cerevisiae YB-210	Apple Juice Liquid, 100%, pH ~5.3 + 0.5% YE	L	12:13:00	8	14	38	11	0.473684	38	11	0.473684	0.460523
15	Y2 S. cerevisiae Y9	Apple Juice Liquid, 100%, pH ~5.3 + 0.5% YE	R	12:17:00	4	15	11	57	-0.638889	57	11	0.638889
16	Y3 S. cerevisiae YB-210	Apple Juice Liquid, 100%, pH ~5.3 + 0.5% YE	R	12:21:00	8	16	8	30	-0.478261	30	8	0.478261
17	Y2 S. cerevisiae Y9	Apple Juice Liquid, 100%, pH ~5.3 + 0.5% YE	L	12:25:00	9	17	30	16	0.254545	30	16	0.254545
18	Y3 S. cerevisiae YB-210	Apple Juice Liquid, 100%, pH ~5.3 + 0.5% YE	L	12:29:00	10	18	39	14	0.396825	39	14	0.396825
19	Y2 S. cerevisiae Y9	Apple Juice Liquid, 100%, pH ~5.3 + 0.5% YE	R	12:33:00	8	19	15	36	-0.355932	36	15	0.355932
20	Y3 S. cerevisiae YB-210	Apple Juice Liquid, 100%, pH ~5.3 + 0.5% YE	R	12:37:00	9	20	11	40	-0.483333	40	11	0.483333
21	Y2 S. cerevisiae Y9	Apple Juice Liquid, 100%, pH ~5.3 + 0.5% YE	L	12:41:00	7	21	22	19	0.0625	22	19	0.0625
22	Y3 S. cerevisiae YB-210	Apple Juice Liquid, 100%, pH ~5.3 + 0.5% YE	L	12:45:00	9	22	39	10	0.5	39	10	0.5
23	Y2 S. cerevisiae Y9	Apple Juice Liquid, 100%, pH ~5.3 + 0.5% YE	R	12:49:00	7	23	13	33	-0.377358	33	13	0.377358
24	Y3 S. cerevisiae YB-210	Apple Juice Liquid, 100%, pH ~5.3 + 0.5% YE	R	12:53:00	11	24	11	36	-0.431034	36	11	0.431034
25	LAB7 Lactobacillus plantarum cs (B48)	Apple Juice Liquid, 100%, pH ~5.3 + 0.5% YE	L	13:18:00	10	25	33	20	0.206349	33	20	0.206349	0.253089
26	LAB8 L. brevis_lab (B65)	Apple Juice Liquid, 100%, pH ~5.3 + 0.5% YE	L	13:22:00	6	26	21	23	-0.04	21	23	-0.04	-0.151876
27	LAB7 Lactobacillus plantarum cs (B48)	Apple Juice Liquid, 100%, pH ~5.3 + 0.5% YE	R	13:26:00	5	27	20	31	-0.196429	31	20	0.196429
28	LAB8 L. brevis_lab (B65)	Apple Juice Liquid, 100%, pH ~5.3 + 0.5% YE	R	13:30:00		28			#DIV/0!	0	0	#DIV/0!
29	LAB7 Lactobacillus plantarum cs (B48)	Apple Juice Liquid, 100%, pH ~5.3 + 0.5% YE	L	13:34:00	4	29	29	17	0.24	29	17	0.24
30	LAB8 L. brevis_lab (B65)	Apple Juice Liquid, 100%, pH ~5.3 + 0.5% YE	L	13:38:00	3	30	26	27	-0.0178571	26	27	-0.0178571
31	LAB7 Lactobacillus plantarum cs (B48)	Apple Juice Liquid, 100%, pH ~5.3 + 0.5% YE	R	13:42:00	2	31	21	37	-0.266667	37	21	0.266667
32	LAB8 L. brevis_lab (B65)	Apple Juice Liquid, 100%, pH ~5.3 + 0.5% YE	R	13:46:00	6	32	26	22	0.0740741	22	26	-0.0740741
33	LAB7 Lactobacillus plantarum cs (B48)	Apple Juice Liquid, 100%, pH ~5.3 + 0.5% YE	L	13:50:00	6	33	28	10	0.409091	28	10	0.409091
34	LAB8 L. brevis_lab (B65)	Apple Juice Liquid, 100%, pH ~5.3 + 0.5% YE	L	13:54:00	6	34	18	39	-0.333333	18	39	-0.333333
35	LAB7 Lactobacillus plantarum cs (B48)	Apple Juice Liquid, 100%, pH ~5.3 + 0.5% YE	R	13:58:00	8	35	16	26	-0.2	26	16	0.2
36	LAB8 L. brevis_lab (B65)	Apple Juice Liquid, 100%, pH ~5.3 + 0.5% YE	R	14:02:00	4	36	31	16	0.294118	16	31	-0.294118
37	LAB10 L. brevis_wild (B135)	Apple Juice Liquid, 100%, pH ~5.3 + 0.5% YE	L	14:27:00	10	37	25	31	-0.0909091	25	31	-0.0909091	-0.004074
38	LAB 11 Leuconostoc sp_Fabian	Apple Juice Liquid, 100%, pH ~5.3 + 0.5% YE	L	14:31:00	6	38	18	35	-0.288136	18	35	-0.288136	-0.104044
39	LAB10 L. brevis_wild (B135)	Apple Juice Liquid, 100%, pH ~5.3 + 0.5% YE	R	14:35:00	6	39	25	20	0.0980392	20	25	-0.0980392
40	LAB 11 Leuconostoc sp_Fabian	Apple Juice Liquid, 100%, pH ~5.3 + 0.5% YE	R	14:39:00	5	40	19	25	-0.122449	25	19	0.122449
41	LAB10 L. brevis_wild (B135)	Apple Juice Liquid, 100%, pH ~5.3 + 0.5% YE	L	14:43:00	5	41	25	26	-0.0178571	25	26	-0.0178571
42	LAB 11 Leuconostoc sp_Fabian	Apple Juice Liquid, 100%, pH ~5.3 + 0.5% YE	L	14:47:00	2	42	27	17	0.217391	27	17	0.217391
43	LAB10 L. brevis_wild (B135)	Apple Juice Liquid, 100%, pH ~5.3 + 0.5% YE	R	14:51:00	5	43	27	33	-0.0923077	33	27	0.0923077
44	LAB 11 Leuconostoc sp_Fabian	Apple Juice Liquid, 100%, pH ~5.3 + 0.5% YE	R	14:55:00	5	44	33	15	0.339623	15	33	-0.339623
45	LAB10 L. brevis_wild (B135)	Apple Juice Liquid, 100%, pH ~5.3 + 0.5% YE	L	14:59:00	6	45	22	20	0.0416667	22	20	0.0416667
46	LAB 11 Leuconostoc sp_Fabian	Apple Juice Liquid, 100%, pH ~5.3 + 0.5% YE	L	15:03:00	7	46	16	12	0.114286	16	12	0.114286
47	LAB10 L. brevis_wild (B135)	Apple Juice Liquid, 100%, pH ~5.3 + 0.5% YE	R	15:07:00	7	47	26	29	-0.0483871	29	26	0.0483871
48	LAB 11 Leuconostoc sp_Fabian	Apple Juice Liquid, 100%, pH ~5.3 + 0.5% YE	R	15:11:00	7	48	32	19	0.224138	19	32	-0.224138
49	AAB18 Acetobacter pasteurianus_lab (B50)	Apple Juice Liquid, 100%, pH ~5.3 + 0.5% YE	L	15:36:00	5	49	38	10	0.528302	38	10	0.528302	0.299169
50	AAB19 A. cerevisiae (B74)	Apple Juice Liquid, 100%, pH ~5.3 + 0.5% YE	L	15:40:00	4	50	31	16	0.294118	31	16	0.294118	0.26226
51	AAB18 Acetobacter pasteurianus_lab (B50)	Apple Juice Liquid, 100%, pH ~5.3 + 0.5% YE	R	15:44:00	3	51	16	32	-0.313725	32	16	0.313725
52	AAB19 A. cerevisiae (B74)	Apple Juice Liquid, 100%, pH ~5.3 + 0.5% YE	R	15:48:00	5	52	17	39	-0.360656	39	17	0.360656
53	AAB18 Acetobacter pasteurianus_lab (B50)	Apple Juice Liquid, 100%, pH ~5.3 + 0.5% YE	L	15:52:00	9	53	33	19	0.229508	33	19	0.229508
54	AAB19 A. cerevisiae (B74)	Apple Juice Liquid, 100%, pH ~5.3 + 0.5% YE	L	15:56:00	6	54	37	25	0.176471	37	25	0.176471
55	AAB18 Acetobacter pasteurianus_lab (B50)	Apple Juice Liquid, 100%, pH ~5.3 + 0.5% YE	R	16:00:00	5	55	20	34	-0.237288	34	20	0.237288
56	AAB19 A. cerevisiae (B74)	Apple Juice Liquid, 100%, pH ~5.3 + 0.5% YE	R	16:04:00	4	56	27	33	-0.09375	33	27	0.09375
57	AAB18 Acetobacter pasteurianus_lab (B50)	Apple Juice Liquid, 100%, pH ~5.3 + 0.5% YE	L	16:08:00	7	57	39	17	0.349206	39	17	0.349206
58	AAB19 A. cerevisiae (B74)	Apple Juice Liquid, 100%, pH ~5.3 + 0.5% YE	L	16:12:00	4	58	38	19	0.311475	38	19	0.311475
59	AAB18 Acetobacter pasteurianus_lab (B50)	Apple Juice Liquid, 100%, pH ~5.3 + 0.5% YE	R	16:16:00	5	59	29	39	-0.136986	39	29	0.136986
60	AAB19 A. cerevisiae (B74)	Apple Juice Liquid, 100%, pH ~5.3 + 0.5% YE	R	16:20:00	9	60	13	40	-0.435484	40	13	0.435484
61	AAB20 A. malorum (B95)	Apple Juice Liquid, 100%, pH ~5.3 + 0.5% YE	L	16:45:00	3	61	28	20	0.156863	28	20	0.156863	0.151386
62	AAB21 A. indonensiensis (B117)	Apple Juice Liquid, 100%, pH ~5.3 + 0.5% YE	L	16:49:00	5	62	37	22	0.234375	37	22	0.234375	0.100211
63	AAB20 A. malorum (B95)	Apple Juice Liquid, 100%, pH ~5.3 + 0.5% YE	R	16:53:00	4	63	16	48	-0.470588	48	16	0.470588
64	AAB21 A. indonensiensis (B117)	Apple Juice Liquid, 100%, pH ~5.3 + 0.5% YE	R	16:57:00	5	64	22	26	-0.0754717	26	22	0.0754717
65	AAB20 A. malorum (B95)	Apple Juice Liquid, 100%, pH ~5.3 + 0.5% YE	L	17:01:00	9	65	26	28	-0.031746	26	28	-0.031746
66	AAB21 A. indonensiensis (B117)	Apple Juice Liquid, 100%, pH ~5.3 + 0.5% YE	L	17:05:00	6	66	27	28	-0.0163934	27	28	-0.0163934
67	AAB20 A. malorum (B95)	Apple Juice Liquid, 100%, pH ~5.3 + 0.5% YE	R	17:09:00	8	67	23	36	-0.19403	36	23	0.19403
68	AAB21 A. indonensiensis (B117)	Apple Juice Liquid, 100%, pH ~5.3 + 0.5% YE	R	17:13:00	5	68	17	29	-0.235294	29	17	0.235294
69	AAB20 A. malorum (B95)	Apple Juice Liquid, 100%, pH ~5.3 + 0.5% YE	L	17:17:00	5	69	24	22	0.0392157	24	22	0.0392157
70	AAB21 A. indonensiensis (B117)	Apple Juice Liquid, 100%, pH ~5.3 + 0.5% YE	L	17:21:00	4	70	39	26	0.188406	39	26	0.188406
71	AAB20 A. malorum (B95)	Apple Juice Liquid, 100%, pH ~5.3 + 0.5% YE	R	17:25:00	4	71	27	32	-0.0793651	32	27	0.0793651
72	AAB21 A. indonensiensis (B117)	Apple Juice Liquid, 100%, pH ~5.3 + 0.5% YE	R	17:29:00	7	72	33	24	0.140625	24	33	-0.140625

## Sheet: Exp3
Experiment #	Test Arm	Control Arm	Test Side	Time_Experiment	Center Flies	Experiment #	Left Arm	Right Arm	Left Side RI	Test Arm	Control Arm	Test Arm RI
1	Mock (empty tube)	Mock (empty tube)	L	11:00:00	13	1	22	25	-0.05	22	25	-0.05	0.0375543
2	Y1 Saccharomyces cerevisiae (I112)	Apple Juice Liquid, 100%, pH ~5.3 + 0.5% YE	L	11:04:00	5	2	34	11	0.46	34	11	0.46	-0.0458668
3	Mock (empty tube)	Mock (empty tube)	R	11:08:00	15	3	24	18	0.105263	18	24	-0.105263	0.28038
4	Y1 Saccharomyces cerevisiae (I112)	Apple Juice Liquid, 100%, pH ~5.3 + 0.5% YE	R	11:12:00	8	4	13	39	-0.433333	39	13	0.433333
5	Mock (empty tube)	Mock (empty tube)	L	11:16:00	10	5	18	14	0.0952381	18	14	0.0952381
6	Y1 Saccharomyces cerevisiae (I112)	Apple Juice Liquid, 100%, pH ~5.3 + 0.5% YE	L	11:20:00	5	6	26	15	0.23913	26	15	0.23913
7	Mock (empty tube)	Mock (empty tube)	R	11:24:00	7	7	28	21	0.125	21	28	-0.125
8	Y1 Saccharomyces cerevisiae (I112)	Apple Juice Liquid, 100%, pH ~5.3 + 0.5% YE	R	11:28:00	5	8	16	28	-0.244898	28	16	0.244898
9	Mock (empty tube)	Mock (empty tube)	L	11:32:00	7	9	23	27	-0.0701754	23	27	-0.0701754
10	Y1 Saccharomyces cerevisiae (I112)	Apple Juice Liquid, 100%, pH ~5.3 + 0.5% YE	L	11:36:00	5	10	35	22	0.209677	35	22	0.209677
11	Mock (empty tube)	Mock (empty tube)	R	11:40:00	11	11	20	19	0.02	19	20	-0.02
12	Y1 Saccharomyces cerevisiae (I112)	Apple Juice Liquid, 100%, pH ~5.3 + 0.5% YE	R	11:44:00	4	12	17	21	-0.0952381	21	17	0.0952381
13	Y2 S. cerevisiae Y9	Apple Juice Liquid, 100%, pH ~5.3 + 0.5% YE	L	12:09:00	4	13	42	13	0.491525	42	13	0.491525	0.448161
14	Y3 S. cerevisiae YB-210	Apple Juice Liquid, 100%, pH ~5.3 + 0.5% YE	L	12:13:00	8	14	33	11	0.423077	33	11	0.423077	0.563795
15	Y2 S. cerevisiae Y9	Apple Juice Liquid, 100%, pH ~5.3 + 0.5% YE	R	12:17:00	6	15	14	33	-0.358491	33	14	0.358491
16	Y3 S. cerevisiae YB-210	Apple Juice Liquid, 100%, pH ~5.3 + 0.5% YE	R	12:21:00	3	16	3	40	-0.804348	40	3	0.804348
17	Y2 S. cerevisiae Y9	Apple Juice Liquid, 100%, pH ~5.3 + 0.5% YE	L	12:25:00	3	17	30	7	0.575	30	7	0.575
18	Y3 S. cerevisiae YB-210	Apple Juice Liquid, 100%, pH ~5.3 + 0.5% YE	L	12:29:00	8	18	32	9	0.469388	32	9	0.469388
19	Y2 S. cerevisiae Y9	Apple Juice Liquid, 100%, pH ~5.3 + 0.5% YE	R	12:33:00	6	19	15	26	-0.234043	26	15	0.234043
20	Y3 S. cerevisiae YB-210	Apple Juice Liquid, 100%, pH ~5.3 + 0.5% YE	R	12:37:00	9	20	9	43	-0.557377	43	9	0.557377
21	Y2 S. cerevisiae Y9	Apple Juice Liquid, 100%, pH ~5.3 + 0.5% YE	L	12:41:00	2	21	45	12	0.559322	45	12	0.559322
22	Y3 S. cerevisiae YB-210	Apple Juice Liquid, 100%, pH ~5.3 + 0.5% YE	L	12:45:00		22	43	8	0.686275	43	8	0.686275
23	Y2 S. cerevisiae Y9	Apple Juice Liquid, 100%, pH ~5.3 + 0.5% YE	R	12:49:00	3	23	12	36	-0.470588	36	12	0.470588
24	Y3 S. cerevisiae YB-210	Apple Juice Liquid, 100%, pH ~5.3 + 0.5% YE	R	12:53:00	5	24	12	35	-0.442308	35	12	0.442308
25	LAB7 Lactobacillus plantarum cs (B48)	Apple Juice Liquid, 100%, pH ~5.3 + 0.5% YE	L	13:18:00	8	25	20	19	0.0212766	20	19	0.0212766	-0.112893
26	LAB8 L. brevis_lab (B65)	Apple Juice Liquid, 100%, pH ~5.3 + 0.5% YE	L	13:22:00	2	26	22	22	0	22	22	0	-0.173255
27	LAB7 Lactobacillus plantarum cs (B48)	Apple Juice Liquid, 100%, pH ~5.3 + 0.5% YE	R	13:26:00	4	27	25	12	0.317073	12	25	-0.317073
28	LAB8 L. brevis_lab (B65)	Apple Juice Liquid, 100%, pH ~5.3 + 0.5% YE	R	13:30:00	3	28	23	12	0.289474	12	23	-0.289474
29	LAB7 Lactobacillus plantarum cs (B48)	Apple Juice Liquid, 100%, pH ~5.3 + 0.5% YE	L	13:34:00	7	29	31	23	0.131148	31	23	0.131148
30	LAB8 L. brevis_lab (B65)	Apple Juice Liquid, 100%, pH ~5.3 + 0.5% YE	L	13:38:00	3	30	25	30	-0.0862069	25	30	-0.0862069
31	LAB7 Lactobacillus plantarum cs (B48)	Apple Juice Liquid, 100%, pH ~5.3 + 0.5% YE	R	13:42:00	4	31	23	18	0.111111	18	23	-0.111111
32	LAB8 L. brevis_lab (B65)	Apple Juice Liquid, 100%, pH ~5.3 + 0.5% YE	R	13:46:00	4	32	39	16	0.389831	16	39	-0.389831
33	LAB7 Lactobacillus plantarum cs (B48)	Apple Juice Liquid, 100%, pH ~5.3 + 0.5% YE	L	13:50:00	3	33	9	29	-0.487805	9	29	-0.487805
34	LAB8 L. brevis_lab (B65)	Apple Juice Liquid, 100%, pH ~5.3 + 0.5% YE	L	13:54:00	5	34	32	34	-0.028169	32	34	-0.028169
35	LAB7 Lactobacillus plantarum cs (B48)	Apple Juice Liquid, 100%, pH ~5.3 + 0.5% YE	R	13:58:00	7	35	23	28	-0.0862069	28	23	0.0862069
36	LAB8 L. brevis_lab (B65)	Apple Juice Liquid, 100%, pH ~5.3 + 0.5% YE	R	14:02:00	3	36	38	17	0.362069	17	38	-0.362069
37	LAB10 L. brevis_wild (B135)	Apple Juice Liquid, 100%, pH ~5.3 + 0.5% YE	L	14:27:00	9	37	11	31	-0.392157	11	31	-0.392157	-0.101475
38	LAB 11 Leuconostoc sp_Fabian	Apple Juice Liquid, 100%, pH ~5.3 + 0.5% YE	L	14:31:00	3	38	11	26	-0.375	11	26	-0.375	-0.136052
39	LAB10 L. brevis_wild (B135)	Apple Juice Liquid, 100%, pH ~5.3 + 0.5% YE	R	14:35:00	7	39	10	23	-0.325	23	10	0.325
40	LAB 11 Leuconostoc sp_Fabian	Apple Juice Liquid, 100%, pH ~5.3 + 0.5% YE	R	14:39:00	5	40	28	20	0.150943	20	28	-0.150943
41	LAB10 L. brevis_wild (B135)	Apple Juice Liquid, 100%, pH ~5.3 + 0.5% YE	L	14:43:00	9	41	11	26	-0.326087	11	26	-0.326087
42	LAB 11 Leuconostoc sp_Fabian	Apple Juice Liquid, 100%, pH ~5.3 + 0.5% YE	L	14:47:00	5	42	19	19	0	19	19	0
43	LAB10 L. brevis_wild (B135)	Apple Juice Liquid, 100%, pH ~5.3 + 0.5% YE	R	14:51:00	4	43	16	33	-0.320755	33	16	0.320755
44	LAB 11 Leuconostoc sp_Fabian	Apple Juice Liquid, 100%, pH ~5.3 + 0.5% YE	R	14:55:00	6	44	29	21	0.142857	21	29	-0.142857
45	LAB10 L. brevis_wild (B135)	Apple Juice Liquid, 100%, pH ~5.3 + 0.5% YE	L	14:59:00	5	45	24	26	-0.0363636	24	26	-0.0363636
46	LAB 11 Leuconostoc sp_Fabian	Apple Juice Liquid, 100%, pH ~5.3 + 0.5% YE	L	15:03:00	7	46	25	26	-0.0172414	25	26	-0.0172414
47	LAB10 L. brevis_wild (B135)	Apple Juice Liquid, 100%, pH ~5.3 + 0.5% YE	R	15:07:00	1	47	31	10	0.5	10	31	-0.5
48	LAB 11 Leuconostoc sp_Fabian	Apple Juice Liquid, 100%, pH ~5.3 + 0.5% YE	R	15:11:00	5	48	33	24	0.145161	24	33	-0.145161
49	AAB18 Acetobacter pasteurianus_lab (B50)	Apple Juice Liquid, 100%, pH ~5.3 + 0.5% YE	L	15:36:00	7	49	22	21	0.02	22	21	0.02	0.127769
50	AAB19 A. cerevisiae (B74)	Apple Juice Liquid, 100%, pH ~5.3 + 0.5% YE	L	15:40:00	4	50	35	20	0.254237	35	20	0.254237	0.0683733
51	AAB18 Acetobacter pasteurianus_lab (B50)	Apple Juice Liquid, 100%, pH ~5.3 + 0.5% YE	R	15:44:00	3	51	16	18	-0.0540541	18	16	0.0540541
52	AAB19 A. cerevisiae (B74)	Apple Juice Liquid, 100%, pH ~5.3 + 0.5% YE	R	15:48:00	2	52	22	40	-0.28125	40	22	0.28125
53	AAB18 Acetobacter pasteurianus_lab (B50)	Apple Juice Liquid, 100%, pH ~5.3 + 0.5% YE	L	15:52:00	4	53	30	20	0.185185	30	20	0.185185
54	AAB19 A. cerevisiae (B74)	Apple Juice Liquid, 100%, pH ~5.3 + 0.5% YE	L	15:56:00	6	54	24	15	0.2	24	15	0.2
55	AAB18 Acetobacter pasteurianus_lab (B50)	Apple Juice Liquid, 100%, pH ~5.3 + 0.5% YE	R	16:00:00	3	55	17	36	-0.339286	36	17	0.339286
56	AAB19 A. cerevisiae (B74)	Apple Juice Liquid, 100%, pH ~5.3 + 0.5% YE	R	16:04:00	6	56	25	28	-0.0508475	28	25	0.0508475
57	AAB18 Acetobacter pasteurianus_lab (B50)	Apple Juice Liquid, 100%, pH ~5.3 + 0.5% YE	L	16:08:00	9	57	21	19	0.0408163	21	19	0.0408163
58	AAB19 A. cerevisiae (B74)	Apple Juice Liquid, 100%, pH ~5.3 + 0.5% YE	L	16:12:00	2	58	31	25	0.103448	31	25	0.103448
59	AAB18 Acetobacter pasteurianus_lab (B50)	Apple Juice Liquid, 100%, pH ~5.3 + 0.5% YE	R	16:16:00	4	59	22	29	-0.127273	29	22	0.127273
60	AAB19 A. cerevisiae (B74)	Apple Juice Liquid, 100%, pH ~5.3 + 0.5% YE	R	16:20:00	5	60	26	14	0.266667	14	26	-0.266667
61	AAB20 A. malorum (B95)	Apple Juice Liquid, 100%, pH ~5.3 + 0.5% YE	L	16:45:00	2	61			0	0	0	0	0.122181
62	AAB21 A. indonensiensis (B117)	Apple Juice Liquid, 100%, pH ~5.3 + 0.5% YE	L	16:49:00	9	62	22	26	-0.0701754	22	26	-0.0701754	0.0634406
63	AAB20 A. malorum (B95)	Apple Juice Liquid, 100%, pH ~5.3 + 0.5% YE	R	16:53:00	5	63	18	27	-0.18	27	18	0.18
64	AAB21 A. indonensiensis (B117)	Apple Juice Liquid, 100%, pH ~5.3 + 0.5% YE	R	16:57:00	9	64	17	21	-0.0851064	21	17	0.0851064
65	AAB20 A. malorum (B95)	Apple Juice Liquid, 100%, pH ~5.3 + 0.5% YE	L	17:01:00	4	65	30	22	0.142857	30	22	0.142857
66	AAB21 A. indonensiensis (B117)	Apple Juice Liquid, 100%, pH ~5.3 + 0.5% YE	L	17:05:00	4	66	22	17	0.116279	22	17	0.116279
67	AAB20 A. malorum (B95)	Apple Juice Liquid, 100%, pH ~5.3 + 0.5% YE	R	17:09:00	4	67	19	24	-0.106383	24	19	0.106383
68	AAB21 A. indonensiensis (B117)	Apple Juice Liquid, 100%, pH ~5.3 + 0.5% YE	R	17:13:00	8	68	23	28	-0.0847458	28	23	0.0847458
69	AAB20 A. malorum (B95)	Apple Juice Liquid, 100%, pH ~5.3 + 0.5% YE	L	17:17:00	0	69	17	24	-0.170732	17	24	-0.170732
70	AAB21 A. indonensiensis (B117)	Apple Juice Liquid, 100%, pH ~5.3 + 0.5% YE	L	17:21:00	2	70	26	30	-0.0689655	26	30	-0.0689655
71	AAB20 A. malorum (B95)	Apple Juice Liquid, 100%, pH ~5.3 + 0.5% YE	R	17:25:00	5	71	13	41	-0.474576	41	13	0.474576
72	AAB21 A. indonensiensis (B117)	Apple Juice Liquid, 100%, pH ~5.3 + 0.5% YE	R	17:29:00	3	72	16	28	-0.255319	28	16	0.255319

## Sheet: Exp4
Experiment #	Test Arm	Control Arm	Test Side	Time_Experiment	Center Flies	Experiment #	Left Arm	Right Arm	Left Side RI	Test Arm	Control Arm	Test Arm RI
1	Mock (empty tube)	Mock (empty tube)	L	11:00:00	12	1	23	22	0.0175439	23	22	0.0175439	-0.104855
2	Y4 Pichia membranefaciens (I46)	Apple Juice Liquid, 100%, pH ~5.3 + 0.5% YE	L	11:04:00	7	2	23	14	0.204545	23	14	0.204545	0.0580003
3	Mock (empty tube)	Mock (empty tube)	R	11:08:00	9	3	18	31	-0.224138	31	18	0.224138	0.269567
4	Y4 Pichia membranefaciens (I46)	Apple Juice Liquid, 100%, pH ~5.3 + 0.5% YE	R	11:12:00	6	4	13	24	-0.255814	24	13	0.255814
5	Mock (empty tube)	Mock (empty tube)	L	11:16:00	11	5	22	25	-0.0517241	22	25	-0.0517241
6	Y4 Pichia membranefaciens (I46)	Apple Juice Liquid, 100%, pH ~5.3 + 0.5% YE	L	11:20:00	3	6	26	11	0.375	26	11	0.375
7	Mock (empty tube)	Mock (empty tube)	R	11:24:00	10	7	14	19	-0.116279	19	14	0.116279
8	Y4 Pichia membranefaciens (I46)	Apple Juice Liquid, 100%, pH ~5.3 + 0.5% YE	R	11:28:00	6	8	13	32	-0.372549	32	13	0.372549
9	Mock (empty tube)	Mock (empty tube)	L	11:32:00	12	9	15	20	-0.106383	15	20	-0.106383
10	Y4 Pichia membranefaciens (I46)	Apple Juice Liquid, 100%, pH ~5.3 + 0.5% YE	L	11:36:00	5	10	21	20	0.0217391	21	20	0.0217391
11	Mock (empty tube)	Mock (empty tube)	R	11:40:00	10	11	18	26	-0.148148	26	18	0.148148
12	Y4 Pichia membranefaciens (I46)	Apple Juice Liquid, 100%, pH ~5.3 + 0.5% YE	R	11:44:00	10	12	10	29	-0.387755	29	10	0.387755
13	LAB L. plantarum (B128)	Apple Juice Liquid, 100%, pH ~5.3 + 0.5% YE	L	12:09:00	7	13	10	26	-0.372093	10	26	-0.372093	-0.123583
14	LAB Leuconostoc durionsis (B140)	Apple Juice Liquid, 100%, pH ~5.3 + 0.5% YE	L	12:13:00	9	14	20	31	-0.183333	20	31	-0.183333	-0.101672
15	LAB L. plantarum (B128)	Apple Juice Liquid, 100%, pH ~5.3 + 0.5% YE	R	12:17:00	6	15	24	11	0.317073	11	24	-0.317073
16	LAB Leuconostoc durionsis (B140)	Apple Juice Liquid, 100%, pH ~5.3 + 0.5% YE	R	12:21:00	4	16	21	20	0.0222222	20	21	-0.0222222
17	LAB L. plantarum (B128)	Apple Juice Liquid, 100%, pH ~5.3 + 0.5% YE	L	12:25:00	12	17	15	20	-0.106383	15	20	-0.106383
18	LAB Leuconostoc durionsis (B140)	Apple Juice Liquid, 100%, pH ~5.3 + 0.5% YE	L	12:29:00	7	18	20	27	-0.12963	20	27	-0.12963
19	LAB L. plantarum (B128)	Apple Juice Liquid, 100%, pH ~5.3 + 0.5% YE	R	12:33:00	4	19	21	21	0	21	21	0
20	LAB Leuconostoc durionsis (B140)	Apple Juice Liquid, 100%, pH ~5.3 + 0.5% YE	R	12:37:00	6	20	23	20	0.0612245	20	23	-0.0612245
21	LAB L. plantarum (B128)	Apple Juice Liquid, 100%, pH ~5.3 + 0.5% YE	L	12:41:00	3	21	16	18	-0.0540541	16	18	-0.0540541
22	LAB Leuconostoc durionsis (B140)	Apple Juice Liquid, 100%, pH ~5.3 + 0.5% YE	L	12:45:00	2	22	19	15	0.111111	19	15	0.111111
23	LAB L. plantarum (B128)	Apple Juice Liquid, 100%, pH ~5.3 + 0.5% YE	R	12:49:00	5	23	14	18	-0.108108	18	14	0.108108
24	LAB Leuconostoc durionsis (B140)	Apple Juice Liquid, 100%, pH ~5.3 + 0.5% YE	R	12:53:00	8	24	29	16	0.245283	16	29	-0.245283
25	AAB A. pasteurianus_wild (B131)	Apple Juice Liquid, 100%, pH ~5.3 + 0.5% YE	L	13:18:00	8	25	20	27	-0.127273	20	27	-0.127273	0.18115
26	AAB A. orleanensis (B132)	Apple Juice Liquid, 100%, pH ~5.3 + 0.5% YE	L	13:22:00	6	26	23	20	0.0612245	23	20	0.0612245	0.151696
27	AAB A. pasteurianus_wild (B131)	Apple Juice Liquid, 100%, pH ~5.3 + 0.5% YE	R	13:26:00	6	27	14	35	-0.381818	35	14	0.381818
28	AAB A. orleanensis (B132)	Apple Juice Liquid, 100%, pH ~5.3 + 0.5% YE	R	13:30:00	8	28	22	26	-0.0714286	26	22	0.0714286
29	AAB A. pasteurianus_wild (B131)	Apple Juice Liquid, 100%, pH ~5.3 + 0.5% YE	L	13:34:00	9	29	31	16	0.267857	31	16	0.267857
30	AAB A. orleanensis (B132)	Apple Juice Liquid, 100%, pH ~5.3 + 0.5% YE	L	13:38:00	5	30	32	14	0.352941	32	14	0.352941
31	AAB A. pasteurianus_wild (B131)	Apple Juice Liquid, 100%, pH ~5.3 + 0.5% YE	R	13:42:00	6	31	17	21	-0.0909091	21	17	0.0909091
32	AAB A. orleanensis (B132)	Apple Juice Liquid, 100%, pH ~5.3 + 0.5% YE	R	13:46:00	5	32	17	28	-0.22	28	17	0.22
33	AAB A. pasteurianus_wild (B131)	Apple Juice Liquid, 100%, pH ~5.3 + 0.5% YE	L	13:50:00	5	33	22	20	0.0425532	22	20	0.0425532
34	AAB A. orleanensis (B132)	Apple Juice Liquid, 100%, pH ~5.3 + 0.5% YE	L	13:54:00	7	34	30	13	0.34	30	13	0.34
35	AAB A. pasteurianus_wild (B131)	Apple Juice Liquid, 100%, pH ~5.3 + 0.5% YE	R	13:58:00	7	35	13	38	-0.431034	38	13	0.431034
36	AAB A. orleanensis (B132)	Apple Juice Liquid, 100%, pH ~5.3 + 0.5% YE	R	14:02:00	2	36	30	19	0.215686	19	30	-0.215686
37	LAB L. fermentum (B122)	Apple Juice Liquid, 100%, pH ~5.3 + 0.5% YE	L	14:27:00	11	37	13	19	-0.139535	13	19	-0.139535	-0.0496632
38	LAB L. fermentum (B122)	Apple Juice Liquid, 100%, pH ~5.3 + 0.5% YE	R	14:31:00	8	38	20	22	-0.04	22	20	0.04
39	LAB L. fermentum (B122)	Apple Juice Liquid, 100%, pH ~5.3 + 0.5% YE	L	14:35:00	9	39	23	20	0.0576923	23	20	0.0576923
40	LAB L. fermentum (B122)	Apple Juice Liquid, 100%, pH ~5.3 + 0.5% YE	R	14:39:00	8	40	16	17	-0.0243902	17	16	0.0243902
41	LAB L. fermentum (B122)	Apple Juice Liquid, 100%, pH ~5.3 + 0.5% YE	L	14:43:00	5	41	8	21	-0.382353	8	21	-0.382353
42	LAB L. fermentum (B122)	Apple Juice Liquid, 100%, pH ~5.3 + 0.5% YE	R	14:47:00	8	42	15	24	-0.191489	24	15	0.191489
43	ACV (25%)	Water	L	15:12:00	2	43	54	12	0.617647	54	12	0.617647	0.502867
44	Benzaldehyde (-2)	Parafin Oil	L	15:16:00	4	44	2	24	-0.733333	2	24	-0.733333	-0.811557
45	ACV (25%)	Water	R	15:20:00	3	45	11	46	-0.583333	46	11	0.583333
46	Benzaldehyde (-2)	Parafin Oil	R	15:24:00	4	46	47	1	0.884615	1	47	-0.884615
47	ACV (25%)	Water	L	15:28:00	4	47	45	15	0.46875	45	15	0.46875
48	Benzaldehyde (-2)	Parafin Oil	L	15:32:00	2	48	0	41	-0.953488	0	41	-0.953488
49	ACV (25%)	Water	R	15:36:00	5	49	10	52	-0.626866	52	10	0.626866
50	Benzaldehyde (-2)	Parafin Oil	R	15:40:00	8	50	29	0	0.783784	0	29	-0.783784
51	ACV (25%)	Water	L	15:44:00	6	51	26	18	0.16	26	18	0.16
52	Benzaldehyde (-2)	Parafin Oil	L	15:48:00	7	52	0	32	-0.820513	0	32	-0.820513
53	ACV (25%)	Water	R	15:52:00	3	53	13	50	-0.560606	50	13	0.560606
54	Benzaldehyde (-2)	Parafin Oil	R	15:56:00	5	54	24	1	0.766667	1	24	-0.766667

## Sheet: Exp5
Experiment #	Test Arm	Control Arm	Test Side	Time_Experiment	Center Flies	Experiment #	Left Arm	Right Arm	Left Side RI	Test Arm	Control Arm	Test Arm RI
1	Mock (empty tube)	Mock (empty tube)	L	11:00:00	14	1	14	20	-0.125	14	20	-0.125	0.0131222
2	Y4 Pichia membranefaciens (I46)	Apple Juice Liquid, 100%, pH ~5.3 + 0.5% YE	L	11:04:00	6	2	26	12	0.318182	26	12	0.318182	-0.0762642
3	Mock (empty tube)	Mock (empty tube)	R	11:08:00	8	3	20	13	0.170732	13	20	-0.170732	0.275873
4	Y4 Pichia membranefaciens (I46)	Apple Juice Liquid, 100%, pH ~5.3 + 0.5% YE	R	11:12:00	7	4	13	23	-0.232558	23	13	0.232558
5	Mock (empty tube)	Mock (empty tube)	L	11:16:00	11	5	22	18	0.0784314	22	18	0.0784314
6	Y4 Pichia membranefaciens (I46)	Apple Juice Liquid, 100%, pH ~5.3 + 0.5% YE	L	11:20:00	2	6	27	7	0.555556	27	7	0.555556
7	Mock (empty tube)	Mock (empty tube)	R	11:24:00	10	7	19	29	-0.172414	29	19	0.172414
8	Y4 Pichia membranefaciens (I46)	Apple Juice Liquid, 100%, pH ~5.3 + 0.5% YE	R	11:28:00	3	8	19	26	-0.145833	26	19	0.145833
9	Mock (empty tube)	Mock (empty tube)	L	11:32:00	8	9	20	28	-0.142857	20	28	-0.142857
10	Y4 Pichia membranefaciens (I46)	Apple Juice Liquid, 100%, pH ~5.3 + 0.5% YE	L	11:36:00	5	10	22	11	0.289474	22	11	0.289474
11	Mock (empty tube)	Mock (empty tube)	R	11:40:00	12	11	34	17	0.269841	17	34	-0.269841
12	Y4 Pichia membranefaciens (I46)	Apple Juice Liquid, 100%, pH ~5.3 + 0.5% YE	R	11:44:00	5	12	17	22	-0.113636	22	17	0.113636
13	Y5 Candida californica	Apple Juice Liquid, 100%, pH ~5.3 + 0.5% YE	L	12:09:00	8	13	35	6	0.591837	35	6	0.591837	0.441671
14	Y6 Hanseniaspora uvarum	Apple Juice Liquid, 100%, pH ~5.3 + 0.5% YE	L	12:13:00	2	14	40	10	0.576923	40	10	0.576923	0.462889
15	Y5 Candida californica	Apple Juice Liquid, 100%, pH ~5.3 + 0.5% YE	R	12:17:00	3	15	9	32	-0.522727	32	9	0.522727
16	Y6 Hanseniaspora uvarum	Apple Juice Liquid, 100%, pH ~5.3 + 0.5% YE	R	12:21:00	9	16	11	39	-0.474576	39	11	0.474576
17	Y5 Candida californica	Apple Juice Liquid, 100%, pH ~5.3 + 0.5% YE	L	12:25:00	4	17	34	9	0.531915	34	9	0.531915
18	Y6 Hanseniaspora uvarum	Apple Juice Liquid, 100%, pH ~5.3 + 0.5% YE	L	12:29:00	4	18	29	8	0.512195	29	8	0.512195
19	Y5 Candida californica	Apple Juice Liquid, 100%, pH ~5.3 + 0.5% YE	R	12:33:00	3	19	18	26	-0.170213	26	18	0.170213
20	Y6 Hanseniaspora uvarum	Apple Juice Liquid, 100%, pH ~5.3 + 0.5% YE	R	12:37:00	8	20	7	34	-0.55102	34	7	0.55102
21	Y5 Candida californica	Apple Juice Liquid, 100%, pH ~5.3 + 0.5% YE	L	12:41:00	7	21	34	9	0.5	34	9	0.5
22	Y6 Hanseniaspora uvarum	Apple Juice Liquid, 100%, pH ~5.3 + 0.5% YE	L	12:45:00	9	22	29	19	0.175439	29	19	0.175439
23	Y5 Candida californica	Apple Juice Liquid, 100%, pH ~5.3 + 0.5% YE	R	12:49:00	4	23	15	32	-0.333333	32	15	0.333333
24	Y6 Hanseniaspora uvarum	Apple Juice Liquid, 100%, pH ~5.3 + 0.5% YE	R	12:53:00	4	24	8	27	-0.487179	27	8	0.487179
25	LAB L. plantarum (B128)	Apple Juice Liquid, 100%, pH ~5.3 + 0.5% YE	L	13:18:00	8	25	14	19	-0.121951	14	19	-0.121951	-0.0465466
26	LAB Leuconostoc durionsis (B140)	Apple Juice Liquid, 100%, pH ~5.3 + 0.5% YE	L	13:22:00	10	26	18	27	-0.163636	18	27	-0.163636	-0.00848015
27	LAB L. plantarum (B128)	Apple Juice Liquid, 100%, pH ~5.3 + 0.5% YE	R	13:26:00	10	27	25	15	0.2	15	25	-0.2
28	LAB Leuconostoc durionsis (B140)	Apple Juice Liquid, 100%, pH ~5.3 + 0.5% YE	R	13:30:00	7	28	26	20	0.113208	20	26	-0.113208
29	LAB L. plantarum (B128)	Apple Juice Liquid, 100%, pH ~5.3 + 0.5% YE	L	13:34:00	10	29	25	14	0.22449	25	14	0.22449
30	LAB Leuconostoc durionsis (B140)	Apple Juice Liquid, 100%, pH ~5.3 + 0.5% YE	L	13:38:00	5	30	21	17	0.0930233	21	17	0.0930233
31	LAB L. plantarum (B128)	Apple Juice Liquid, 100%, pH ~5.3 + 0.5% YE	R	13:42:00	9	31	28	18	0.181818	18	28	-0.181818
32	LAB Leuconostoc durionsis (B140)	Apple Juice Liquid, 100%, pH ~5.3 + 0.5% YE	R	13:46:00	8	32	18	25	-0.137255	25	18	0.137255
33	LAB L. plantarum (B128)	Apple Juice Liquid, 100%, pH ~5.3 + 0.5% YE	L	13:50:00	10	33	16	16	0	16	16	0
34	LAB Leuconostoc durionsis (B140)	Apple Juice Liquid, 100%, pH ~5.3 + 0.5% YE	L	13:54:00	6	34	24	18	0.125	24	18	0.125
35	LAB L. plantarum (B128)	Apple Juice Liquid, 100%, pH ~5.3 + 0.5% YE	R	13:58:00	9	35	20	20	0	20	20	0
36	LAB Leuconostoc durionsis (B140)	Apple Juice Liquid, 100%, pH ~5.3 + 0.5% YE	R	14:02:00	4	36	27	16	0.234043	16	27	-0.234043
37	AAB A. pasteurianus_wild (B131)	Apple Juice Liquid, 100%, pH ~5.3 + 0.5% YE	L	14:27:00	5	37	21	21	0	21	21	0	0.0979589
38	AAB A. orleanensis (B132)	Apple Juice Liquid, 100%, pH ~5.3 + 0.5% YE	L	14:31:00	5	38	15	14	0.0294118	15	14	0.0294118	0.0817327
39	AAB A. pasteurianus_wild (B131)	Apple Juice Liquid, 100%, pH ~5.3 + 0.5% YE	R	14:35:00	5	39	12	13	-0.0333333	13	12	0.0333333
40	AAB A. orleanensis (B132)	Apple Juice Liquid, 100%, pH ~5.3 + 0.5% YE	R	14:39:00	8	40	25	50	-0.301205	50	25	0.301205
41	AAB A. pasteurianus_wild (B131)	Apple Juice Liquid, 100%, pH ~5.3 + 0.5% YE	L	14:43:00	10	41	38	37	0.0117647	38	37	0.0117647
42	AAB A. orleanensis (B132)	Apple Juice Liquid, 100%, pH ~5.3 + 0.5% YE	L	14:47:00	8	42	33	24	0.138462	33	24	0.138462
43	AAB A. pasteurianus_wild (B131)	Apple Juice Liquid, 100%, pH ~5.3 + 0.5% YE	R	14:51:00	12	43	22	39	-0.232877	39	22	0.232877
44	AAB A. orleanensis (B132)	Apple Juice Liquid, 100%, pH ~5.3 + 0.5% YE	R	14:55:00	9	44	40	31	0.1125	31	40	-0.1125
45	AAB A. pasteurianus_wild (B131)	Apple Juice Liquid, 100%, pH ~5.3 + 0.5% YE	L	14:59:00	8	45	37	23	0.205882	37	23	0.205882
46	AAB A. orleanensis (B132)	Apple Juice Liquid, 100%, pH ~5.3 + 0.5% YE	L	15:03:00	5	46	36	24	0.184615	36	24	0.184615
47	AAB A. pasteurianus_wild (B131)	Apple Juice Liquid, 100%, pH ~5.3 + 0.5% YE	R	15:07:00	11	47	29	37	-0.103896	37	29	0.103896
48	AAB A. orleanensis (B132)	Apple Juice Liquid, 100%, pH ~5.3 + 0.5% YE	R	15:11:00	9	48	30	44	-0.168675	44	30	0.168675
49	LAB L. fermentum (B122)	Apple Juice Liquid, 100%, pH ~5.3 + 0.5% YE	L	15:36:00	11	49	16	22	-0.122449	16	22	-0.122449	0.0317006
50	LAB L. fermentum (B122)	Apple Juice Liquid, 100%, pH ~5.3 + 0.5% YE	R	15:40:00	3	50	19	26	-0.145833	26	19	0.145833
51	LAB L. fermentum (B122)	Apple Juice Liquid, 100%, pH ~5.3 + 0.5% YE	L	15:44:00	3	51	25	17	0.177778	25	17	0.177778
52	LAB L. fermentum (B122)	Apple Juice Liquid, 100%, pH ~5.3 + 0.5% YE	R	15:48:00	X	52	X		#VALUE!	0	X	#VALUE!
53	LAB L. fermentum (B122)	Apple Juice Liquid, 100%, pH ~5.3 + 0.5% YE	L	15:52:00	4	53	14	13	0.0322581	14	13	0.0322581
54	LAB L. fermentum (B122)	Apple Juice Liquid, 100%, pH ~5.3 + 0.5% YE	R	15:56:00	5	54	22	24	-0.0392157	24	22	0.0392157
55	ACV (25%)	Water	L	16:21:00	8	55	38	8	0.555556	38	8	0.555556	0.5873
56	Benzaldehyde (-2)	Parafin Oil	L	16:25:00	7	56	2	31	-0.725	2	31	-0.725	-0.725648
57	ACV (25%)	Water	R	16:29:00	2	57	15	41	-0.448276	41	15	0.448276
58	Benzaldehyde (-2)	Parafin Oil	L	16:33:00	3	58	1	44	-0.895833	1	44	-0.895833
59	ACV (25%)	Water	L	16:37:00	4	59	45	10	0.59322	45	10	0.59322
60	Benzaldehyde (-2)	Parafin Oil	R	16:41:00	2	60	49	1	0.923077	1	49	-0.923077
61	ACV (25%)	Water	R	16:45:00	6	61	15	44	-0.446154	44	15	0.446154
62	Benzaldehyde (-2)	Parafin Oil	L	16:49:00	6	62	0	60	-0.909091	0	60	-0.909091
63	ACV (25%)	Water	L	16:53:00	4	63	41	4	0.755102	41	4	0.755102
64	Benzaldehyde (-2)	Parafin Oil	R	16:57:00	9	64	42	1	0.788462	1	42	-0.788462
65	ACV (25%)	Water	R	17:01:00	4	65	5	42	-0.72549	42	5	0.72549
66	Benzaldehyde (-2)	Parafin Oil	R	17:05:00	15	66	9	22	-0.282609	9	22	-0.282609

## Sheet: Exp6
Experiment #	Test Arm	Control Arm	Test Side	Time_Experiment	Center Flies	Experiment #	Left Arm	Right Arm	Left Side RI	Test Arm	Control Arm	Test Arm RI
1	Mock (empty tube)	Mock (empty tube)	L	11:00:00	11	1	19	14	0.113636	19	14	0.113636	0.106563
2	Y4 Pichia membranefaciens (I46)	Apple Juice Liquid, 100%, pH ~5.3 + 0.5% YE	L	11:04:00	6	2	44	5	0.709091	44	5	0.709091	0.0440518
3	Mock (empty tube)	Mock (empty tube)	R	11:08:00	6	3	14	20	-0.15	20	14	0.15	0.30963
4	Y4 Pichia membranefaciens (I46)	Apple Juice Liquid, 100%, pH ~5.3 + 0.5% YE	R	11:12:00	1	4	17	27	-0.222222	27	17	0.222222
5	Mock (empty tube)	Mock (empty tube)	L	11:16:00	8	5	25	14	0.234043	25	14	0.234043
6	Y4 Pichia membranefaciens (I46)	Apple Juice Liquid, 100%, pH ~5.3 + 0.5% YE	L	11:20:00	6	6	38	12	0.464286	38	12	0.464286
7	Mock (empty tube)	Mock (empty tube)	R	11:24:00	6	7	22	23	-0.0196078	23	22	0.0196078
8	Y4 Pichia membranefaciens (I46)	Apple Juice Liquid, 100%, pH ~5.3 + 0.5% YE	R	11:28:00	13	8	19	29	-0.163934	29	19	0.163934
9	Mock (empty tube)	Mock (empty tube)	L	11:32:00	7	9	23	18	0.104167	23	18	0.104167
10	Y4 Pichia membranefaciens (I46)	Apple Juice Liquid, 100%, pH ~5.3 + 0.5% YE	L	11:36:00	4	10	35	18	0.298246	35	18	0.298246
11	Mock (empty tube)	Mock (empty tube)	R	11:40:00	5	11	26	11	0.357143	11	26	-0.357143
12	Y4 Pichia membranefaciens (I46)	Apple Juice Liquid, 100%, pH ~5.3 + 0.5% YE	R	11:44:00	4	12	29	29	0	29	29	0
13	Y5 Candida californica	Apple Juice Liquid, 100%, pH ~5.3 + 0.5% YE	L	12:09:00	9	13	41	8	0.568966	41	8	0.568966	0.449716
14	Y6 Hanseniaspora uvarum	Apple Juice Liquid, 100%, pH ~5.3 + 0.5% YE	L	12:13:00	5	14	27	11	0.372093	27	11	0.372093	0.428534
15	Y5 Candida californica	Apple Juice Liquid, 100%, pH ~5.3 + 0.5% YE	R	12:17:00	3	15	13	38	-0.462963	38	13	0.462963
16	Y6 Hanseniaspora uvarum	Apple Juice Liquid, 100%, pH ~5.3 + 0.5% YE	R	12:21:00	3	16	13	38	-0.462963	38	13	0.462963
17	Y5 Candida californica	Apple Juice Liquid, 100%, pH ~5.3 + 0.5% YE	L	12:25:00	6	17	35	12	0.433962	35	12	0.433962
18	Y6 Hanseniaspora uvarum	Apple Juice Liquid, 100%, pH ~5.3 + 0.5% YE	L	12:29:00	5	18	27	18	0.18	27	18	0.18
19	Y5 Candida californica	Apple Juice Liquid, 100%, pH ~5.3 + 0.5% YE	R	12:33:00	9	19	10	30	-0.408163	30	10	0.408163
20	Y6 Hanseniaspora uvarum	Apple Juice Liquid, 100%, pH ~5.3 + 0.5% YE	R	12:37:00	4	20	17	34	-0.309091	34	17	0.309091
21	Y5 Candida californica	Apple Juice Liquid, 100%, pH ~5.3 + 0.5% YE	L	12:41:00	7	21	31	7	0.533333	31	7	0.533333
22	Y6 Hanseniaspora uvarum	Apple Juice Liquid, 100%, pH ~5.3 + 0.5% YE	L	12:45:00	4	22	42	9	0.6	42	9	0.6
23	Y5 Candida californica	Apple Juice Liquid, 100%, pH ~5.3 + 0.5% YE	R	12:49:00	3	23	18	34	-0.290909	34	18	0.290909
24	Y6 Hanseniaspora uvarum	Apple Juice Liquid, 100%, pH ~5.3 + 0.5% YE	R	12:53:00	8	24	5	38	-0.647059	38	5	0.647059
25	LAB L. plantarum (B128)	Apple Juice Liquid, 100%, pH ~5.3 + 0.5% YE	L	13:18:00	3	25	26	16	0.222222	26	16	0.222222	0.122233
26	LAB Leuconostoc durionsis (B140)	Apple Juice Liquid, 100%, pH ~5.3 + 0.5% YE	L	13:22:00	6	26	21	23	-0.04	21	23	-0.04	-0.109769
27	LAB L. plantarum (B128)	Apple Juice Liquid, 100%, pH ~5.3 + 0.5% YE	R	13:26:00	6	27	22	31	-0.152542	31	22	0.152542
28	LAB Leuconostoc durionsis (B140)	Apple Juice Liquid, 100%, pH ~5.3 + 0.5% YE	R	13:30:00	6	28	30	16	0.269231	16	30	-0.269231
29	LAB L. plantarum (B128)	Apple Juice Liquid, 100%, pH ~5.3 + 0.5% YE	L	13:34:00	2	29	30	20	0.192308	30	20	0.192308
30	LAB Leuconostoc durionsis (B140)	Apple Juice Liquid, 100%, pH ~5.3 + 0.5% YE	L	13:38:00	12	30	30	26	0.0588235	30	26	0.0588235
31	LAB L. plantarum (B128)	Apple Juice Liquid, 100%, pH ~5.3 + 0.5% YE	R	13:42:00	4	31	29	25	0.0689655	25	29	-0.0689655
32	LAB Leuconostoc durionsis (B140)	Apple Juice Liquid, 100%, pH ~5.3 + 0.5% YE	R	13:46:00	9	32	27	25	0.0327869	25	27	-0.0327869
33	LAB L. plantarum (B128)	Apple Juice Liquid, 100%, pH ~5.3 + 0.5% YE	L	13:50:00	9	33	27	15	0.235294	27	15	0.235294
34	LAB Leuconostoc durionsis (B140)	Apple Juice Liquid, 100%, pH ~5.3 + 0.5% YE	L	13:54:00	1	34	14	28	-0.325581	14	28	-0.325581
35	LAB L. plantarum (B128)	Apple Juice Liquid, 100%, pH ~5.3 + 0.5% YE	R	13:58:00	6	35	25	25	0	25	25	0
36	LAB Leuconostoc durionsis (B140)	Apple Juice Liquid, 100%, pH ~5.3 + 0.5% YE	R	14:02:00	4	36	24	15	0.209302	15	24	-0.209302
37	AAB A. pasteurianus_wild (B131)	Apple Juice Liquid, 100%, pH ~5.3 + 0.5% YE	L	14:27:00	10	37	31	16	0.263158	31	16	0.263158	0.0784087
38	AAB A. orleanensis (B132)	Apple Juice Liquid, 100%, pH ~5.3 + 0.5% YE	L	14:31:00	11	38	32	18	0.229508	32	18	0.229508	0.140738
39	AAB A. pasteurianus_wild (B131)	Apple Juice Liquid, 100%, pH ~5.3 + 0.5% YE	R	14:35:00	6	39	20	25	-0.0980392	25	20	0.0980392
40	AAB A. orleanensis (B132)	Apple Juice Liquid, 100%, pH ~5.3 + 0.5% YE	R	14:39:00	5	40	14	23	-0.214286	23	14	0.214286
41	AAB A. pasteurianus_wild (B131)	Apple Juice Liquid, 100%, pH ~5.3 + 0.5% YE	L	14:43:00	7	41	26	19	0.134615	26	19	0.134615
42	AAB A. orleanensis (B132)	Apple Juice Liquid, 100%, pH ~5.3 + 0.5% YE	L	14:47:00	8	42	18	14	0.1	18	14	0.1
43	AAB A. pasteurianus_wild (B131)	Apple Juice Liquid, 100%, pH ~5.3 + 0.5% YE	R	14:51:00	7	43	18	29	-0.203704	29	18	0.203704
44	AAB A. orleanensis (B132)	Apple Juice Liquid, 100%, pH ~5.3 + 0.5% YE	R	14:55:00	4	44	22	24	-0.04	24	22	0.04
45	AAB A. pasteurianus_wild (B131)	Apple Juice Liquid, 100%, pH ~5.3 + 0.5% YE	L	14:59:00	5	45	24	29	-0.0862069	24	29	-0.0862069
46	AAB A. orleanensis (B132)	Apple Juice Liquid, 100%, pH ~5.3 + 0.5% YE	L	15:03:00	4	46	29	26	0.0508475	29	26	0.0508475
47	AAB A. pasteurianus_wild (B131)	Apple Juice Liquid, 100%, pH ~5.3 + 0.5% YE	R	15:07:00	4	47	34	25	0.142857	25	34	-0.142857
48	AAB A. orleanensis (B132)	Apple Juice Liquid, 100%, pH ~5.3 + 0.5% YE	R	15:11:00	7	48	18	35	-0.283333	35	18	0.283333
49	LAB L. fermentum (B122)	Apple Juice Liquid, 100%, pH ~5.3 + 0.5% YE	L	15:36:00	3	49	21	23	-0.0425532	21	23	-0.0425532	-0.00010608
50	LAB L. fermentum (B122)	Apple Juice Liquid, 100%, pH ~5.3 + 0.5% YE	R	15:40:00	6	50	24	26	-0.0357143	26	24	0.0357143
51	LAB L. fermentum (B122)	Apple Juice Liquid, 100%, pH ~5.3 + 0.5% YE	L	15:44:00	7	51	18	29	-0.203704	18	29	-0.203704
52	LAB L. fermentum (B122)	Apple Juice Liquid, 100%, pH ~5.3 + 0.5% YE	R	15:48:00	4	52	22	28	-0.111111	28	22	0.111111
53	LAB L. fermentum (B122)	Apple Juice Liquid, 100%, pH ~5.3 + 0.5% YE	L	15:52:00	7	53	26	19	0.134615	26	19	0.134615
54	LAB L. fermentum (B122)	Apple Juice Liquid, 100%, pH ~5.3 + 0.5% YE	R	15:56:00	1	54	25	25	0	25	25	0
55	ACV (25%)	Water	L	16:21:00	5	55	46	4	0.763636	46	4	0.763636	0.585442
56	Benzaldehyde (-2)	Parafin Oil	L	16:25:00	4	56	33	1	0.842105	1	33	-0.842105	-0.813387
57	ACV (25%)	Water	R	16:29:00	5	57	10	32	-0.468085	32	10	0.468085
58	Benzaldehyde (-2)	Parafin Oil	R	16:33:00	14	58	1	33	-0.666667	1	33	-0.666667
59	ACV (25%)	Water	L	16:37:00	5	59	42	6	0.679245	42	6	0.679245
60	Benzaldehyde (-2)	Parafin Oil	L	16:41:00	0	60	49	1	0.96	1	49	-0.96
61	ACV (25%)	Water	R	16:45:00	5	61	10	45	-0.583333	45	10	0.583333
62	Benzaldehyde (-2)	Parafin Oil	R	16:49:00	10	62	3	56	-0.768116	3	56	-0.768116
63	ACV (25%)	Water	L	16:53:00	4	63	44	14	0.483871	44	14	0.483871
64	Benzaldehyde (-2)	Parafin Oil	R	16:57:00	9	64	32	1	0.738095	1	32	-0.738095
65	ACV (25%)	Water	R	17:01:00	7	65	10	41	-0.534483	41	10	0.534483
66	Benzaldehyde (-2)	Parafin Oil	R	17:05:00	10	66	2	46	-0.758621	2	46	-0.758621

## Sheet: Exp7
Experiment #	Test Arm	Control Arm	Test Side	Time_Experiment	Center Flies	Experiment #	Left Arm	Right Arm	Left Side RI	Test Arm	Control Arm	Test Arm RI
1	Mock	Mock	L	10:00:00	9	1	23	21	0.0377358	23	21	0.0377358	0.0314008
2	Mock	Mock	R	10:05:00	5	2	34	23	0.177419	23	34	-0.177419
3	Mock	Mock	L	10:10:00	7	3	23	23	0	23	23	0
4	Mock	Mock	R	10:15:00	11	4	20	27	-0.12069	27	20	0.12069
5	Mock	Mock	L	10:20:00	9	5	34	23	0.166667	34	23	0.166667
6	Mock	Mock	R	10:25:00	7	6	22	26	-0.0727273	26	22	0.0727273
7	ACV (1/4)	Water	L	10:30:00	3	7	44	15	0.467742	44	15	0.467742	0.616381
8	ACV (1/4)	Water	R	10:35:00	4	8	9	40	-0.584906	40	9	0.584906
9	ACV (1/4)	Water	L	10:40:00	2	9	52	3	0.859649	52	3	0.859649
10	ACV (1/4)	Water	R	10:45:00	4	10	17	48	-0.449275	48	17	0.449275
11	ACV (1/4)	Water	L	10:50:00	8	11	45	5	0.689655	45	5	0.689655
12	ACV (1/4)	Water	R	10:55:00	2	12	11	55	-0.647059	55	11	0.647059
13	Benzaldehyde (-2)	Paraffin Oil	L	11:00:00	4	13	1	46	-0.882353	1	46	-0.882353	-0.82831
14	Benzaldehyde (-2)	Paraffin Oil	R	11:05:00	1	14	57	4	0.854839	4	57	-0.854839
15	Benzaldehyde (-2)	Paraffin Oil	L	11:10:00	11	15	3	37	-0.666667	3	37	-0.666667
16	Benzaldehyde (-2)	Paraffin Oil	R	11:15:00	2	16	55	1	0.931034	1	55	-0.931034
17	Benzaldehyde (-2)	Paraffin Oil	L	11:20:00	0	17	3	62	-0.907692	3	62	-0.907692
18	Benzaldehyde (-2)	Paraffin Oil	R	11:25:00	1	18	47	7	0.727273	7	47	-0.727273
19	L. brevis_lab (B65)	Apple Juice Liquid, 100%, pH ~5.3 + 0.5% YE	L	11:30:00	2	19	31	34	-0.0447761	31	34	-0.0447761	-0.173018
20	L. brevis_lab (B65)	Apple Juice Liquid, 100%, pH ~5.3 + 0.5% YE	R	11:35:00	7	20	33	20	0.216667	20	33	-0.216667
21	L. brevis_lab (B65)	Apple Juice Liquid, 100%, pH ~5.3 + 0.5% YE	L	11:40:00	4	21	21	35	-0.233333	21	35	-0.233333
22	L. brevis_lab (B65)	Apple Juice Liquid, 100%, pH ~5.3 + 0.5% YE	R	11:45:00	6	22	28	10	0.409091	10	28	-0.409091
23	L. brevis_lab (B65)	Apple Juice Liquid, 100%, pH ~5.3 + 0.5% YE	L	11:50:00	4	23	24	23	0.0196078	24	23	0.0196078
24	L. brevis_lab (B65)	Apple Juice Liquid, 100%, pH ~5.3 + 0.5% YE	R	11:55:00	7	24	34	24	0.153846	24	34	-0.153846
25	L. brevis_wild (B135)	Apple Juice Liquid, 100%, pH ~5.3 + 0.5% YE	L	12:20:00	6	25	17	35	-0.310345	17	35	-0.310345	-0.116441
26	L. brevis_wild (B135)	Apple Juice Liquid, 100%, pH ~5.3 + 0.5% YE	R	12:24:00	2	26	25	30	-0.0877193	30	25	0.0877193
27	L. brevis_wild (B135)	Apple Juice Liquid, 100%, pH ~5.3 + 0.5% YE	L	12:28:00	6	27	26	31	-0.0793651	26	31	-0.0793651
28	L. brevis_wild (B135)	Apple Juice Liquid, 100%, pH ~5.3 + 0.5% YE	R	12:32:00	1	28	25	17	0.186047	17	25	-0.186047
29	L. brevis_wild (B135)	Apple Juice Liquid, 100%, pH ~5.3 + 0.5% YE	L	12:36:00	3	29	29	28	0.0166667	29	28	0.0166667
30	L. brevis_wild (B135)	Apple Juice Liquid, 100%, pH ~5.3 + 0.5% YE	R	12:40:00	7	30	37	22	0.227273	22	37	-0.227273
31	L. plantarum cs	Apple Juice Liquid, 100%, pH ~5.3 + 0.5% YE	L	13:05:00	2	31	23	26	-0.0588235	23	26	-0.0588235	-0.0949021
32	L. plantarum cs	Apple Juice Liquid, 100%, pH ~5.3 + 0.5% YE	R	13:09:00	6	32	21	22	-0.0204082	22	21	0.0204082
33	L. plantarum cs	Apple Juice Liquid, 100%, pH ~5.3 + 0.5% YE	L	13:13:00	5	33	21	30	-0.160714	21	30	-0.160714
34	L. plantarum cs	Apple Juice Liquid, 100%, pH ~5.3 + 0.5% YE	R	13:17:00	5	34	26	18	0.163265	18	26	-0.163265
35	L. plantarum cs	Apple Juice Liquid, 100%, pH ~5.3 + 0.5% YE	L	13:21:00	7	35	21	29	-0.140351	21	29	-0.140351
36	L. plantarum cs	Apple Juice Liquid, 100%, pH ~5.3 + 0.5% YE	R	13:25:00	4	36	30	26	0.0666667	26	30	-0.0666667

## Sheet: Exp8
Experiment #	Test Arm	Control Arm	Test Side	Time_Experiment	Center Flies	Experiment #	Left Arm	Right Arm	Left Side RI	Test Arm	Control Arm	Test Arm RI
1	Mock	Mock	L	10:00:00	7	1	30	35	-0.0694444	30	35	-0.0694444	-0.0538051
2	Mock	Mock	R	10:05:00	8	2	36	32	0.0526316	32	36	-0.0526316
3	Mock	Mock	L	10:10:00	4	3	33	33	0	33	33	0
4	Mock	Mock	R	10:15:00	13	4	16	27	-0.196429	27	16	0.196429
5	Mock	Mock	L	10:20:00	9	5	28	36	-0.109589	28	36	-0.109589
6	Mock	Mock	R	10:25:00	7	6	32	32	0	32	32	0
7	ACV (1/4)	Water	L	10:30:00	6	7	70	8	0.738095	70	8	0.738095	0.746638
8	ACV (1/4)	Water	R	10:35:00	4	8	8	53	-0.692308	53	8	0.692308
9	ACV (1/4)	Water	L	10:40:00	3	9	55	8	0.712121	55	8	0.712121
10	ACV (1/4)	Water	R	10:45:00	4	10	2	58	-0.875	58	2	0.875
11	ACV (1/4)	Water	L	10:50:00	1	11	49	6	0.767857	49	6	0.767857
12	ACV (1/4)	Water	R	10:55:00	2	12	10	60	-0.694444	60	10	0.694444
13	Benzaldehyde (-2)	Paraffin Oil	L	11:00:00	7	13	4	61	-0.791667	4	61	-0.791667	-0.82117
14	Benzaldehyde (-2)	Paraffin Oil	R	11:05:00	5	14	66	3	0.851351	3	66	-0.851351
15	Benzaldehyde (-2)	Paraffin Oil	L	11:10:00	6	15	1	56	-0.873016	1	56	-0.873016
16	Benzaldehyde (-2)	Paraffin Oil	R	11:15:00	4	16	55	6	0.753846	6	55	-0.753846
17	Benzaldehyde (-2)	Paraffin Oil	L	11:20:00	2	17	3	51	-0.857143	3	51	-0.857143
18	Benzaldehyde (-2)	Paraffin Oil	R	11:25:00	4	18	61	5	0.8	5	61	-0.8
19	L. brevis_lab (B65)	Apple Juice Liquid, 100%, pH ~5.3 + 0.5% YE	L	11:30:00	12	19	33	46	-0.142857	33	46	-0.142857	-0.149081
20	L. brevis_lab (B65)	Apple Juice Liquid, 100%, pH ~5.3 + 0.5% YE	R	11:35:00	11	20	41	34	0.0813953	34	41	-0.0813953
21	L. brevis_lab (B65)	Apple Juice Liquid, 100%, pH ~5.3 + 0.5% YE	L	11:40:00	2	21	23	31	-0.142857	23	31	-0.142857
22	L. brevis_lab (B65)	Apple Juice Liquid, 100%, pH ~5.3 + 0.5% YE	R	11:45:00	11	22	39	24	0.202703	24	39	-0.202703
23	L. brevis_lab (B65)	Apple Juice Liquid, 100%, pH ~5.3 + 0.5% YE	L	11:50:00	13	23	31	31	0	31	31	0
24	L. brevis_lab (B65)	Apple Juice Liquid, 100%, pH ~5.3 + 0.5% YE	R	11:55:00	6	24	48	23	0.324675	23	48	-0.324675
25	L. brevis_wild (B135)	Apple Juice Liquid, 100%, pH ~5.3 + 0.5% YE	L	12:20:00	6	25	32	29	0.0447761	32	29	0.0447761	-0.103393
26	L. brevis_wild (B135)	Apple Juice Liquid, 100%, pH ~5.3 + 0.5% YE	R	12:24:00	7	26	35	28	0.1	28	35	-0.1
27	L. brevis_wild (B135)	Apple Juice Liquid, 100%, pH ~5.3 + 0.5% YE	L	12:28:00	7	27	18	36	-0.295082	18	36	-0.295082
28	L. brevis_wild (B135)	Apple Juice Liquid, 100%, pH ~5.3 + 0.5% YE	R	12:32:00	5	28	30	26	0.0655738	26	30	-0.0655738
29	L. brevis_wild (B135)	Apple Juice Liquid, 100%, pH ~5.3 + 0.5% YE	L	12:36:00	10	29	25	32	-0.104478	25	32	-0.104478
30	L. brevis_wild (B135)	Apple Juice Liquid, 100%, pH ~5.3 + 0.5% YE	R	12:40:00	13	30	32	25	0.1	25	32	-0.1
31	L. plantarum cs	Apple Juice Liquid, 100%, pH ~5.3 + 0.5% YE	L	13:05:00	5	31	40	30	0.133333	40	30	0.133333	0.052661
32	L. plantarum cs	Apple Juice Liquid, 100%, pH ~5.3 + 0.5% YE	R	13:09:00	5	32	26	30	-0.0655738	30	26	0.0655738
33	L. plantarum cs	Apple Juice Liquid, 100%, pH ~5.3 + 0.5% YE	L	13:13:00	8	33	31	29	0.0294118	31	29	0.0294118
34	L. plantarum cs	Apple Juice Liquid, 100%, pH ~5.3 + 0.5% YE	R	13:17:00	11	34	35	29	0.08	29	35	-0.08
35	L. plantarum cs	Apple Juice Liquid, 100%, pH ~5.3 + 0.5% YE	L	13:21:00	6	35	39	35	0.05	39	35	0.05
36	L. plantarum cs	Apple Juice Liquid, 100%, pH ~5.3 + 0.5% YE	R	13:25:00	7	36	34	44	-0.117647	44	34	0.117647

## Sheet: Exp9
Experiment #	Test Arm	Control Arm	Test Side	Time_Experiment	Center Flies	Experiment #	Left Arm	Right Arm	Left Side RI	Test Arm	Control Arm	Test Arm RI
1	Mock	Mock	L	10:00:00	12	1	21	30	-0.142857	21	30	-0.142857	-0.0498716
2	Mock	Mock	R	10:05:00	14	2	34	35	-0.0120482	35	34	0.0120482
3	Mock	Mock	L	10:10:00	14	3	26	34	-0.108108	26	34	-0.108108
4	Mock	Mock	R	10:15:00	8	4	32	26	0.0909091	26	32	-0.0909091
5	Mock	Mock	L	10:20:00	7	5	30	28	0.0307692	30	28	0.0307692
6	Mock	Mock	R	10:25:00	8	6	20	29	-0.157895	29	20	0.157895
7	ACV (1/4)	Water	L	10:30:00	3	7	56	9	0.691176	56	9	0.691176	0.635101
8	ACV (1/4)	Water	R	10:35:00	0	8	10	55	-0.692308	55	10	0.692308
9	ACV (1/4)	Water	L	10:40:00	3	9	58	9	0.7	58	9	0.7
10	ACV (1/4)	Water	R	10:45:00	2	10	7	40	-0.673469	40	7	0.673469
11	ACV (1/4)	Water	L	10:50:00	6	11	53	12	0.577465	53	12	0.577465
12	ACV (1/4)	Water	R	10:55:00	5	12	14	44	-0.47619	44	14	0.47619
13	Benzaldehyde (-2)	Paraffin Oil	L	11:00:00	11	13	3	50	-0.734375	3	50	-0.734375	-0.650093
14	Benzaldehyde (-2)	Paraffin Oil	R	11:05:00	10	14	47	5	0.677419	5	47	-0.677419
15	Benzaldehyde (-2)	Paraffin Oil	L	11:10:00	12	15	1	44	-0.754386	1	44	-0.754386
16	Benzaldehyde (-2)	Paraffin Oil	R	11:15:00	17	16	37	10	0.421875	10	37	-0.421875
17	Benzaldehyde (-2)	Paraffin Oil	L	11:20:00	13	17	7	44	-0.578125	7	44	-0.578125
18	Benzaldehyde (-2)	Paraffin Oil	R	11:25:00	13	18	49	2	0.734375	2	49	-0.734375
19	L. brevis_lab (B65)	Apple Juice Liquid, 100%, pH ~5.3 + 0.5% YE	L	10:00:00	2	19	29	27	0.0344828	29	27	0.0344828	0.0707901
20	L. brevis_lab (B65)	Apple Juice Liquid, 100%, pH ~5.3 + 0.5% YE	R	10:04:00	1	20	21	33	-0.218182	33	21	0.218182
21	L. brevis_lab (B65)	Apple Juice Liquid, 100%, pH ~5.3 + 0.5% YE	L	10:08:00	5	21	33	32	0.0142857	33	32	0.0142857
22	L. brevis_lab (B65)	Apple Juice Liquid, 100%, pH ~5.3 + 0.5% YE	R	10:12:00	3	22	29	32	-0.046875	32	29	0.046875
23	L. brevis_lab (B65)	Apple Juice Liquid, 100%, pH ~5.3 + 0.5% YE	L	10:16:00	3	23	30	23	0.125	30	23	0.125
24	L. brevis_lab (B65)	Apple Juice Liquid, 100%, pH ~5.3 + 0.5% YE	R	10:20:00	4	24	34	33	0.0140845	33	34	-0.0140845
25	L. brevis_wild (B135)	Apple Juice Liquid, 100%, pH ~5.3 + 0.5% YE	L	11:30:00	10	19	28	47	-0.223529	28	47	-0.223529	-0.032532
26	L. brevis_wild (B135)	Apple Juice Liquid, 100%, pH ~5.3 + 0.5% YE	R	11:35:00	14	20	27	34	-0.0933333	34	27	0.0933333
27	L. brevis_wild (B135)	Apple Juice Liquid, 100%, pH ~5.3 + 0.5% YE	L	11:40:00	6	21	25	28	-0.0508475	25	28	-0.0508475
28	L. brevis_wild (B135)	Apple Juice Liquid, 100%, pH ~5.3 + 0.5% YE	R	11:45:00	13	22	30	28	0.028169	28	30	-0.028169
29	L. brevis_wild (B135)	Apple Juice Liquid, 100%, pH ~5.3 + 0.5% YE	L	11:50:00	8	23	32	27	0.0746269	32	27	0.0746269
30	L. brevis_wild (B135)	Apple Juice Liquid, 100%, pH ~5.3 + 0.5% YE	R	11:55:00	6	24	32	28	0.0606061	28	32	-0.0606061
31	L. plantarum cs	Apple Juice Liquid, 100%, pH ~5.3 + 0.5% YE	L	12:20:00	9	25	45	32	0.151163	45	32	0.151163	0.0655543
32	L. plantarum cs	Apple Juice Liquid, 100%, pH ~5.3 + 0.5% YE	R	12:24:00	11	26	35	30	0.0657895	30	35	-0.0657895
33	L. plantarum cs	Apple Juice Liquid, 100%, pH ~5.3 + 0.5% YE	L	12:28:00	4	27	30	24	0.103448	30	24	0.103448
34	L. plantarum cs	Apple Juice Liquid, 100%, pH ~5.3 + 0.5% YE	R	12:32:00	10	28	18	39	-0.313433	39	18	0.313433
35	L. plantarum cs	Apple Juice Liquid, 100%, pH ~5.3 + 0.5% YE	L	12:36:00	10	29	31	29	0.0285714	31	29	0.0285714
36	L. plantarum cs	Apple Juice Liquid, 100%, pH ~5.3 + 0.5% YE	R	12:40:00	15	30	38	27	0.1375	27	38	-0.1375
