# Supplementary material for: Metabolite exchange between microbiome members produces compounds that influence Drosophila behavior
Source: eLife. 2017 Jan 9;6:e18855. doi: 10.7554/eLife.18855 (PMC5222558; doi:10.7554/eLife.18855)
Supplement: Figure 1—source data 2. — DOI: http://dx.doi.org/10.7554/eLife.18855.005 [file elife-18855-fig1-data2.xlsx]

## Sheet: Exp1
Experiment #	Fly Strain	Test Arm	Control Arm	Test Side	Time_Experiment	Center Flies	Experiment #	Left Arm	Right Arm	Left Side RI	Test Arm	Control Arm	Test Arm RI
1	Canton-S (CR)	Mock (empty tube)	Mock (empty tube)	L	09:00:00	5	1	19	29	-0.188679	19	29	-0.188679	-0.0227548
2	Canton-S (CR)	Mock (empty tube)	Mock (empty tube)	R	09:05:00	12	2	21	28	-0.114754	28	21	0.114754
3	Canton-S (CR)	Mock (empty tube)	Mock (empty tube)	L	09:10:00	10	3	31	24	0.107692	31	24	0.107692
4	Canton-S (CR)	Mock (empty tube)	Mock (empty tube)	R	09:15:00	8	4	31	22	0.147541	22	31	-0.147541
5	Canton-S (CR)	Mock (empty tube)	Mock (empty tube)	L	09:20:00	4	5	26	26	0	26	26	0
6	Canton-S (CR)	Mock (empty tube)	Mock (empty tube)	R	09:25:00		6			#DIV/0!	0	0	#DIV/0!
7	Canton-S (CR)	ACV (25%)	H20	L	09:55:00	3	7	36	8	0.595745	36	8	0.595745	0.461275
8	Canton-S (CR)	ACV (25%)	H20	R	10:00:00	12	8	12	32	-0.357143	32	12	0.357143
9	Canton-S (CR)	ACV (25%)	H20	L	10:05:00	6	9	39	4	0.714286	39	4	0.714286
10	Canton-S (CR)	ACV (25%)	H20	R	10:10:00	7	10	15	34	-0.339286	34	15	0.339286
11	Canton-S (CR)	ACV (25%)	H20	L	10:15:00	6	11	56	5	0.761194	56	5	0.761194
12	Canton-S (CR)	ACV (25%)	H20	R	10:20:00	2	12	23	23	0	23	23	0
13	Canton-S (CR)	Saccharomyces cerevisiae_Acetobacter malorum Co-culture, grown 96 h	Saccharomyces cerevisiae_Acetobacter malorum grown 96 h separately and mixed immediately prior	L	10:50:00	3	13	49	5	0.77193	49	5	0.77193	0.488843
14	Canton-S (CR)	Saccharomyces cerevisiae_Acetobacter malorum Co-culture, grown 96 h	Saccharomyces cerevisiae_Acetobacter malorum grown 96 h separately and mixed immediately prior	R	10:55:00	1	14	24	41	-0.257576	41	24	0.257576
15	Canton-S (CR)	Saccharomyces cerevisiae_Acetobacter malorum Co-culture, grown 96 h	Saccharomyces cerevisiae_Acetobacter malorum grown 96 h separately and mixed immediately prior	L	11:00:00	3	15	33	8	0.568182	33	8	0.568182
16	Canton-S (CR)	Saccharomyces cerevisiae_Acetobacter malorum Co-culture, grown 96 h	Saccharomyces cerevisiae_Acetobacter malorum grown 96 h separately and mixed immediately prior	R	11:05:00	4	16	13	52	-0.565217	52	13	0.565217
17	Canton-S (CR)	Saccharomyces cerevisiae_Acetobacter malorum Co-culture, grown 96 h	Saccharomyces cerevisiae_Acetobacter malorum grown 96 h separately and mixed immediately prior	L	11:10:00	4	17	37	10	0.529412	37	10	0.529412
18	Canton-S (CR)	Saccharomyces cerevisiae_Acetobacter malorum Co-culture, grown 96 h	Saccharomyces cerevisiae_Acetobacter malorum grown 96 h separately and mixed immediately prior	R	11:15:00	3	18	19	32	-0.240741	32	19	0.240741
19	Canton-S (CR)	Lactobacillus plantarum cs_A. malorum, grown 96 h	Lactobacillus plantarum cs_A. malorum, grown 96 h separately and mixed immediately prior	L	11:45:00	6	19	37	8	0.568627	37	8	0.568627	0.340635
20	Canton-S (CR)	Lactobacillus plantarum cs_A. malorum, grown 96 h	Lactobacillus plantarum cs_A. malorum, grown 96 h separately and mixed immediately prior	R	11:50:00	2	20	21	49	-0.388889	49	21	0.388889
21	Canton-S (CR)	Lactobacillus plantarum cs_A. malorum, grown 96 h	Lactobacillus plantarum cs_A. malorum, grown 96 h separately and mixed immediately prior	L	11:55:00	0	21	38	12	0.52	38	12	0.52
22	Canton-S (CR)	Lactobacillus plantarum cs_A. malorum, grown 96 h	Lactobacillus plantarum cs_A. malorum, grown 96 h separately and mixed immediately prior	R	12:00:00	4	22	23	34	-0.180328	34	23	0.180328
23	Canton-S (CR)	Lactobacillus plantarum cs_A. malorum, grown 96 h	Lactobacillus plantarum cs_A. malorum, grown 96 h separately and mixed immediately prior	L	12:05:00	7	23	35	15	0.350877	35	15	0.350877
24	Canton-S (CR)	Lactobacillus plantarum cs_A. malorum, grown 96 h	Lactobacillus plantarum cs_A. malorum, grown 96 h separately and mixed immediately prior	R	12:10:00	7	24	24	26	-0.0350877	26	24	0.0350877
25	Canton-S (CR)	S cerevisiae_A. malorum_L. plantarum cs tri-culture, grown 96 h	S. cerevisiae_A. malorum_L. plantarum cs grown 96 h separately and mixed immediately prior	L	12:40:00	3	25	37	14	0.425926	37	14	0.425926	0.550197
26	Canton-S (CR)	S cerevisiae_A. malorum_L. plantarum cs tri-culture, grown 96 h	S. cerevisiae_A. malorum_L. plantarum cs grown 96 h separately and mixed immediately prior	R	12:45:00	5	26	12	40	-0.491228	40	12	0.491228
27	Canton-S (CR)	S cerevisiae_A. malorum_L. plantarum cs tri-culture, grown 96 h	S. cerevisiae_A. malorum_L. plantarum cs grown 96 h separately and mixed immediately prior	L	12:50:00	2	27	51	6	0.762712	51	6	0.762712
28	Canton-S (CR)	S cerevisiae_A. malorum_L. plantarum cs tri-culture, grown 96 h	S. cerevisiae_A. malorum_L. plantarum cs grown 96 h separately and mixed immediately prior	R	12:55:00	5	28	12	42	-0.508475	42	12	0.508475
29	Canton-S (CR)	S cerevisiae_A. malorum_L. plantarum cs tri-culture, grown 96 h	S. cerevisiae_A. malorum_L. plantarum cs grown 96 h separately and mixed immediately prior	L	13:00:00	4	29	38	5	0.702128	38	5	0.702128
30	Canton-S (CR)	S cerevisiae_A. malorum_L. plantarum cs tri-culture, grown 96 h	S. cerevisiae_A. malorum_L. plantarum cs grown 96 h separately and mixed immediately prior	R	13:05:00	3	30	15	38	-0.410714	38	15	0.410714
31	Canton-S (CR)	S cerevisiae_L. plantarum cs co-culture, grown 96 h	S. cerevisiae_L. plantarum cs grown 96 h separately and mixed immediately prior	L	13:35:00	8	31	38	17	0.333333	38	17	0.333333	0.107945
32	Canton-S (CR)	S cerevisiae_L. plantarum cs co-culture, grown 96 h	S. cerevisiae_L. plantarum cs grown 96 h separately and mixed immediately prior	R	13:40:00	3	32	29	21	0.150943	21	29	-0.150943
33	Canton-S (CR)	S cerevisiae_L. plantarum cs co-culture, grown 96 h	S. cerevisiae_L. plantarum cs grown 96 h separately and mixed immediately prior	L	13:45:00	4	33	37	16	0.368421	37	16	0.368421
34	Canton-S (CR)	S cerevisiae_L. plantarum cs co-culture, grown 96 h	S. cerevisiae_L. plantarum cs grown 96 h separately and mixed immediately prior	R	13:50:00	4	34	28	25	0.0526316	25	28	-0.0526316
35	Canton-S (CR)	S cerevisiae_L. plantarum cs co-culture, grown 96 h	S. cerevisiae_L. plantarum cs grown 96 h separately and mixed immediately prior	L	13:55:00	7	35	29	17	0.226415	29	17	0.226415
36	Canton-S (CR)	S cerevisiae_L. plantarum cs co-culture, grown 96 h	S. cerevisiae_L. plantarum cs grown 96 h separately and mixed immediately prior	R	14:00:00	4	36	33	28	0.0769231	28	33	-0.0769231

## Sheet: Exp2
Experiment #	Fly Strain	Test Arm	Control Arm	Test Side	Time_Experiment	Center Flies	Experiment #	Left Arm	Right Arm	Left Side RI	Test Arm	Control Arm	Test Arm RI
1	Canton-S (CR)	Mock (empty tube)	Mock (empty tube)	L	09:00:00	10	1	26	15	0.215686	26	15	0.215686	-0.00478201
2	Canton-S (CR)	Mock (empty tube)	Mock (empty tube)	R	09:05:00	7	2	22	23	-0.0192308	23	22	0.0192308
3	Canton-S (CR)	Mock (empty tube)	Mock (empty tube)	L	09:10:00	8	3	29	24	0.0819672	29	24	0.0819672
4	Canton-S (CR)	Mock (empty tube)	Mock (empty tube)	R	09:15:00	10	4	36	24	0.171429	24	36	-0.171429
5	Canton-S (CR)	Mock (empty tube)	Mock (empty tube)	L	09:20:00	8	5	20	27	-0.127273	20	27	-0.127273
6	Canton-S (CR)	Mock (empty tube)	Mock (empty tube)	R	09:25:00	7	6	30	27	0.046875	27	30	-0.046875
7	Canton-S (CR)	Saccharomcyes cerevisiae_Acetobacter malorum_Lactobacillus plantarum cs tri-culture, grown 96 h	Saccharomyces cerevisiae_Acetobacter malorum Co-culture, grown 96 h	L	09:55:00	8	7	40	13	0.442623	40	13	0.442623	0.309698
8	Canton-S (CR)	Saccharomcyes cerevisiae_Acetobacter malorum_Lactobacillus plantarum cs tri-culture, grown 96 h	Saccharomyces cerevisiae_Acetobacter malorum Co-culture, grown 96 h	R	10:00:00	4	8	18	43	-0.384615	43	18	0.384615
9	Canton-S (CR)	Saccharomcyes cerevisiae_Acetobacter malorum_Lactobacillus plantarum cs tri-culture, grown 96 h	Saccharomyces cerevisiae_Acetobacter malorum Co-culture, grown 96 h	L	10:05:00	11	9	30	9	0.42	30	9	0.42
10	Canton-S (CR)	Saccharomcyes cerevisiae_Acetobacter malorum_Lactobacillus plantarum cs tri-culture, grown 96 h	Saccharomyces cerevisiae_Acetobacter malorum Co-culture, grown 96 h	R	10:10:00	5	10	30	40	-0.133333	40	30	0.133333
11	Canton-S (CR)	Saccharomcyes cerevisiae_Acetobacter malorum_Lactobacillus plantarum cs tri-culture, grown 96 h	Saccharomyces cerevisiae_Acetobacter malorum Co-culture, grown 96 h	L	10:15:00	2	11	34	17	0.320755	34	17	0.320755
12	Canton-S (CR)	Saccharomcyes cerevisiae_Acetobacter malorum_Lactobacillus plantarum cs tri-culture, grown 96 h	Saccharomyces cerevisiae_Acetobacter malorum Co-culture, grown 96 h	R	10:20:00	7	12	18	26	-0.156863	26	18	0.156863
13	Canton-S (CR)	S cerevisiae_A. malorum Co-culture, grown 96 h	S cerevisiae_A malorum grown 96 h separately and mixed immediately prior	L	10:50:00	3	13	52	16	0.507042	52	16	0.507042	0.424991
14	Canton-S (CR)	S cerevisiae_A. malorum Co-culture, grown 96 h	S cerevisiae_A malorum grown 96 h separately and mixed immediately prior	R	10:55:00	4	14	16	33	-0.320755	33	16	0.320755
15	Canton-S (CR)	S cerevisiae_A. malorum Co-culture, grown 96 h	S cerevisiae_A malorum grown 96 h separately and mixed immediately prior	L	11:00:00	2	15	41	13	0.5	41	13	0.5
16	Canton-S (CR)	S cerevisiae_A. malorum Co-culture, grown 96 h	S cerevisiae_A malorum grown 96 h separately and mixed immediately prior	R	11:05:00	4	16	11	66	-0.679012	66	11	0.679012
17	Canton-S (CR)	S cerevisiae_A. malorum Co-culture, grown 96 h	S cerevisiae_A malorum grown 96 h separately and mixed immediately prior	L	11:10:00	4	17	39	17	0.366667	39	17	0.366667
18	Canton-S (CR)	S cerevisiae_A. malorum Co-culture, grown 96 h	S cerevisiae_A malorum grown 96 h separately and mixed immediately prior	R	11:15:00	4	18	19	28	-0.176471	28	19	0.176471
19	Canton-S (CR)	L plantarum cs_A. malorum, grown 96 h	L. plantarum cs_A. malorum, grown 96 h separately and mixed immediately prior	L	11:45:00	4	19	35	18	0.298246	35	18	0.298246	0.133578
20	Canton-S (CR)	L plantarum cs_A. malorum, grown 96 h	L. plantarum cs_A. malorum, grown 96 h separately and mixed immediately prior	R	11:50:00	4	20	21	24	-0.0612245	24	21	0.0612245
21	Canton-S (CR)	L plantarum cs_A. malorum, grown 96 h	L. plantarum cs_A. malorum, grown 96 h separately and mixed immediately prior	L	11:55:00	10	21	36	15	0.344262	36	15	0.344262
22	Canton-S (CR)	L plantarum cs_A. malorum, grown 96 h	L. plantarum cs_A. malorum, grown 96 h separately and mixed immediately prior	R	12:00:00	4	22	26	30	-0.0666667	30	26	0.0666667
23	Canton-S (CR)	L plantarum cs_A. malorum, grown 96 h	L. plantarum cs_A. malorum, grown 96 h separately and mixed immediately prior	L	12:05:00	5	23	34	24	0.15873	34	24	0.15873
24	Canton-S (CR)	L plantarum cs_A. malorum, grown 96 h	L. plantarum cs_A. malorum, grown 96 h separately and mixed immediately prior	R	12:10:00	3	24	25	19	0.12766	19	25	-0.12766
25	Canton-S (CR)	S cerevisiae_A. malorum_L. plantarum cs tri-culture, grown 96 h	S. cerevisiae_A. malorum_L. plantarum cs grown 96 h separately and mixed immediately prior	L	12:40:00	2	25	56	4	0.83871	56	4	0.83871	0.521929
26	Canton-S (CR)	S cerevisiae_A. malorum_L. plantarum cs tri-culture, grown 96 h	S. cerevisiae_A. malorum_L. plantarum cs grown 96 h separately and mixed immediately prior	R	12:45:00	8	26	12	44	-0.5	44	12	0.5
27	Canton-S (CR)	S cerevisiae_A. malorum_L. plantarum cs tri-culture, grown 96 h	S. cerevisiae_A. malorum_L. plantarum cs grown 96 h separately and mixed immediately prior	L	12:50:00	6	27	36	16	0.344828	36	16	0.344828
28	Canton-S (CR)	S cerevisiae_A. malorum_L. plantarum cs tri-culture, grown 96 h	S. cerevisiae_A. malorum_L. plantarum cs grown 96 h separately and mixed immediately prior	R	12:55:00	4	28	13	44	-0.508197	44	13	0.508197
29	Canton-S (CR)	S cerevisiae_A. malorum_L. plantarum cs tri-culture, grown 96 h	S. cerevisiae_A. malorum_L. plantarum cs grown 96 h separately and mixed immediately prior	L	13:00:00		29			#DIV/0!	0	0	#DIV/0!
30	Canton-S (CR)	S cerevisiae_A. malorum_L. plantarum cs tri-culture, grown 96 h	S. cerevisiae_A. malorum_L. plantarum cs grown 96 h separately and mixed immediately prior	R	13:05:00	7	30	16	44	-0.41791	44	16	0.41791
31	Canton-S (CR)	S cerevisiae_L. plantarum cs co-culture, grown 96 h	S. cerevisiae_L. plantarum cs grown 96 h separately and mixed immediately prior	L	13:35:00	4	31	28	27	0.0169492	28	27	0.0169492	-0.0297863
32	Canton-S (CR)	S cerevisiae_L. plantarum cs co-culture, grown 96 h	S. cerevisiae_L. plantarum cs grown 96 h separately and mixed immediately prior	R	13:40:00	9	32	13	32	-0.351852	32	13	0.351852
33	Canton-S (CR)	S cerevisiae_L. plantarum cs co-culture, grown 96 h	S. cerevisiae_L. plantarum cs grown 96 h separately and mixed immediately prior	L	13:45:00	7	33	31	15	0.301887	31	15	0.301887
34	Canton-S (CR)	S cerevisiae_L. plantarum cs co-culture, grown 96 h	S. cerevisiae_L. plantarum cs grown 96 h separately and mixed immediately prior	R	13:50:00	1	34	40	13	0.5	13	40	-0.5
35	Canton-S (CR)	S cerevisiae_L. plantarum cs co-culture, grown 96 h	S. cerevisiae_L. plantarum cs grown 96 h separately and mixed immediately prior	L	13:55:00	12	35	27	22	0.0819672	27	22	0.0819672
36	Canton-S (CR)	S cerevisiae_L. plantarum cs co-culture, grown 96 h	S. cerevisiae_L. plantarum cs grown 96 h separately and mixed immediately prior	R	14:00:00	3	36	35	13	0.431373	13	35	-0.431373

## Sheet: Exp3
Experiment #	Fly Strain	Test Arm	Control Arm	Test Side	Time_Experiment	Center Flies	Experiment #	Left Arm	Right Arm	Left Side RI	Test Arm	Control Arm	Test Arm RI
1	Canton-S (CR)	Mock (empty tube)	Mock (empty tube)	L	09:00:00	12	1	18	22	-0.0769231	18	22	-0.0769231	-0.0107317
2	Canton-S (CR)	Mock (empty tube)	Mock (empty tube)	R	09:05:00	10	2	26	20	0.107143	20	26	-0.107143
3	Canton-S (CR)	Mock (empty tube)	Mock (empty tube)	L	09:10:00	11	3	31	17	0.237288	31	17	0.237288
4	Canton-S (CR)	Mock (empty tube)	Mock (empty tube)	R	09:15:00	8	4	19	20	-0.0212766	20	19	0.0212766
5	Canton-S (CR)	Mock (empty tube)	Mock (empty tube)	L	09:20:00	10	5	21	32	-0.174603	21	32	-0.174603
6	Canton-S (CR)	Mock (empty tube)	Mock (empty tube)	R	09:25:00	6	6	24	26	-0.0357143	26	24	0.0357143
7	Canton-S (CR)	ACV (25%)	H20	L	09:55:00	4	7	53	15	0.527778	53	15	0.527778	0.606699
8	Canton-S (CR)	ACV (25%)	H20	R	10:00:00	7	8	11	42	-0.516667	42	11	0.516667
9	Canton-S (CR)	ACV (25%)	H20	L	10:05:00	3	9	45	8	0.660714	45	8	0.660714
10	Canton-S (CR)	ACV (25%)	H20	R	10:10:00	3	10	4	42	-0.77551	42	4	0.77551
11	Canton-S (CR)	ACV (25%)	H20	L	10:15:00	3	11	56	11	0.642857	56	11	0.642857
12	Canton-S (CR)	ACV (25%)	H20	R	10:20:00	3	12	13	44	-0.516667	44	13	0.516667
13	Canton-S (CR)	Saccharomyces cerevisiae_Acetobacter malorum Co-culture, grown 96 h	Saccharomyces cerevisiae_Acetobacter malorum grown 96 h separately and mixed immediately prior	L	10:50:00	8	13	23	14	0.2	23	14	0.2	0.487165
14	Canton-S (CR)	Saccharomyces cerevisiae_Acetobacter malorum Co-culture, grown 96 h	Saccharomyces cerevisiae_Acetobacter malorum grown 96 h separately and mixed immediately prior	R	10:55:00	4	14	9	56	-0.681159	56	9	0.681159
15	Canton-S (CR)	Saccharomyces cerevisiae_Acetobacter malorum Co-culture, grown 96 h	Saccharomyces cerevisiae_Acetobacter malorum grown 96 h separately and mixed immediately prior	L	11:00:00	4	15	45	5	0.740741	45	5	0.740741
16	Canton-S (CR)	Saccharomyces cerevisiae_Acetobacter malorum Co-culture, grown 96 h	Saccharomyces cerevisiae_Acetobacter malorum grown 96 h separately and mixed immediately prior	R	11:05:00	6	16	22	39	-0.253731	39	22	0.253731
17	Canton-S (CR)	Saccharomyces cerevisiae_Acetobacter malorum Co-culture, grown 96 h	Saccharomyces cerevisiae_Acetobacter malorum grown 96 h separately and mixed immediately prior	L	11:10:00	3	17	40	13	0.482143	40	13	0.482143
18	Canton-S (CR)	Saccharomyces cerevisiae_Acetobacter malorum Co-culture, grown 96 h	Saccharomyces cerevisiae_Acetobacter malorum grown 96 h separately and mixed immediately prior	R	11:15:00	0	18	15	54	-0.565217	54	15	0.565217
19	Canton-S (CR)	Lactobacillus plantarum cs_A. malorum, grown 96 h	Lactobacillus plantarum cs_A. malorum, grown 96 h separately and mixed immediately prior	L	11:45:00	6	19	47	8	0.639344	47	8	0.639344	0.335274
20	Canton-S (CR)	Lactobacillus plantarum cs_A. malorum, grown 96 h	Lactobacillus plantarum cs_A. malorum, grown 96 h separately and mixed immediately prior	R	11:50:00	5	20	22	23	-0.02	23	22	0.02
21	Canton-S (CR)	Lactobacillus plantarum cs_A. malorum, grown 96 h	Lactobacillus plantarum cs_A. malorum, grown 96 h separately and mixed immediately prior	L	11:55:00	1	21	43	16	0.45	43	16	0.45
22	Canton-S (CR)	Lactobacillus plantarum cs_A. malorum, grown 96 h	Lactobacillus plantarum cs_A. malorum, grown 96 h separately and mixed immediately prior	R	12:00:00	1	22	20	37	-0.293103	37	20	0.293103
23	Canton-S (CR)	Lactobacillus plantarum cs_A. malorum, grown 96 h	Lactobacillus plantarum cs_A. malorum, grown 96 h separately and mixed immediately prior	L	12:05:00	6	23	33	15	0.333333	33	15	0.333333
24	Canton-S (CR)	Lactobacillus plantarum cs_A. malorum, grown 96 h	Lactobacillus plantarum cs_A. malorum, grown 96 h separately and mixed immediately prior	R	12:10:00	2	24	20	36	-0.275862	36	20	0.275862
25	Canton-S (CR)	S cerevisiae_A. malorum_L. plantarum cs tri-culture, grown 96 h	S. cerevisiae_A. malorum_L. plantarum cs grown 96 h separately and mixed immediately prior	L	12:40:00	4	25	50	7	0.704918	50	8	0.677419	0.566728
26	Canton-S (CR)	S cerevisiae_A. malorum_L. plantarum cs tri-culture, grown 96 h	S. cerevisiae_A. malorum_L. plantarum cs grown 96 h separately and mixed immediately prior	R	12:45:00	2	26	13	39	-0.481481	39	14	0.454545
27	Canton-S (CR)	S cerevisiae_A. malorum_L. plantarum cs tri-culture, grown 96 h	S. cerevisiae_A. malorum_L. plantarum cs grown 96 h separately and mixed immediately prior	L	12:50:00	1	27	37	9	0.595745	37	10	0.5625
28	Canton-S (CR)	S cerevisiae_A. malorum_L. plantarum cs tri-culture, grown 96 h	S. cerevisiae_A. malorum_L. plantarum cs grown 96 h separately and mixed immediately prior	R	12:55:00	3	28	10	48	-0.622951	48	11	0.596774
29	Canton-S (CR)	S cerevisiae_A. malorum_L. plantarum cs tri-culture, grown 96 h	S. cerevisiae_A. malorum_L. plantarum cs grown 96 h separately and mixed immediately prior	L	13:00:00	2	29	51	5	0.793103	51	10	0.650794
30	Canton-S (CR)	S cerevisiae_A. malorum_L. plantarum cs tri-culture, grown 96 h	S. cerevisiae_A. malorum_L. plantarum cs grown 96 h separately and mixed immediately prior	R	13:05:00	7	30	15	49	-0.478873	49	16	0.458333
31	Canton-S (CR)	S cerevisiae_L. plantarum cs co-culture, grown 96 h	S. cerevisiae_L. plantarum cs grown 96 h separately and mixed immediately prior	L	13:35:00	4	31	34	15	0.358491	34	15	0.358491	0.14953
32	Canton-S (CR)	S cerevisiae_L. plantarum cs co-culture, grown 96 h	S. cerevisiae_L. plantarum cs grown 96 h separately and mixed immediately prior	R	13:40:00	4	32	23	30	-0.122807	30	23	0.122807
33	Canton-S (CR)	S cerevisiae_L. plantarum cs co-culture, grown 96 h	S. cerevisiae_L. plantarum cs grown 96 h separately and mixed immediately prior	L	13:45:00	7	33	38	15	0.383333	38	15	0.383333
34	Canton-S (CR)	S cerevisiae_L. plantarum cs co-culture, grown 96 h	S. cerevisiae_L. plantarum cs grown 96 h separately and mixed immediately prior	R	13:50:00	10	34	23	19	0.0769231	19	23	-0.0769231
35	Canton-S (CR)	S cerevisiae_L. plantarum cs co-culture, grown 96 h	S. cerevisiae_L. plantarum cs grown 96 h separately and mixed immediately prior	L	13:55:00	9	35	29	18	0.196429	29	18	0.196429
36	Canton-S (CR)	S cerevisiae_L. plantarum cs co-culture, grown 96 h	S. cerevisiae_L. plantarum cs grown 96 h separately and mixed immediately prior	R	14:00:00	5	36	35	29	0.0869565	29	35	-0.0869565
37	Canton-S (CR)	S cerevisiae_A. malorum_L. plantarum cs tri-culture, grown 96 h	Saccharomyces cerevisiae_Acetobacter malorum Co-culture, grown 96 h	L	14:30:00	6	37	36	14	0.392857	36	14	0.392857	0.186144
38	Canton-S (CR)	S cerevisiae_A. malorum_L. plantarum cs tri-culture, grown 96 h	Saccharomyces cerevisiae_Acetobacter malorum Co-culture, grown 96 h	R	14:35:00	1	38	28	33	-0.0806452	33	28	0.0806452
39	Canton-S (CR)	S cerevisiae_A. malorum_L. plantarum cs tri-culture, grown 96 h	Saccharomyces cerevisiae_Acetobacter malorum Co-culture, grown 96 h	L	14:40:00	1	39	40	19	0.35	40	19	0.35
40	Canton-S (CR)	S cerevisiae_A. malorum_L. plantarum cs tri-culture, grown 96 h	Saccharomyces cerevisiae_Acetobacter malorum Co-culture, grown 96 h	R	14:45:00	4	40	25	33	-0.129032	33	25	0.129032
41	Canton-S (CR)	S cerevisiae_A. malorum_L. plantarum cs tri-culture, grown 96 h	Saccharomyces cerevisiae_Acetobacter malorum Co-culture, grown 96 h	L	14:50:00	6	41	38	19	0.301587	38	19	0.301587
42	Canton-S (CR)	S cerevisiae_A. malorum_L. plantarum cs tri-culture, grown 96 h	Saccharomyces cerevisiae_Acetobacter malorum Co-culture, grown 96 h	R	14:55:00	2	42	28	21	0.137255	21	28	-0.137255
