# Supplementary material for: Metabolite exchange between microbiome members produces compounds that influence Drosophila behavior
Source: eLife. 2017 Jan 9;6:e18855. doi: 10.7554/eLife.18855 (PMC5222558; doi:10.7554/eLife.18855)
Supplement: Figure 1—source data 3. — DOI: http://dx.doi.org/10.7554/eLife.18855.006 [file elife-18855-fig1-data3.xlsx]

## Sheet: Exp1
Experiment #	Test Arm	Control Arm	Test Side	Time_Experiment	Center Flies	Experiment #	Left Arm	Right Arm	Left Side RI	Test Arm	Control Arm	Test Arm RI
1	Mock (empty tube)	Mock (empty tube)	L	10:00:00	10	1	27	25	0.0322581	27	25	0.0322581	0.0743905
2	Mock (empty tube)	Mock (empty tube)	R	10:04:00	13	2	33	36	-0.0365854	36	33	0.0365854
3	Mock (empty tube)	Mock (empty tube)	L	10:08:00	6	3	26	20	0.115385	26	20	0.115385
4	Mock (empty tube)	Mock (empty tube)	R	10:12:00	10	4	25	26	-0.0163934	26	25	0.0163934
5	Mock (empty tube)	Mock (empty tube)	L	10:16:00	10	5	24	17	0.137255	24	17	0.137255
6	Mock (empty tube)	Mock (empty tube)	R	10:20:00	12	6	26	20	0.103448	20	26	-0.103448
7	ACV (25%)	Water	L	10:45:00	8	7	58	15	0.530864	58	15	0.530864	0.630039
8	ACV (25%)	Water	R	10:49:00	4	8	10	55	-0.652174	55	10	0.652174
9	ACV (25%)	Water	L	10:53:00	6	9	44	18	0.382353	44	18	0.382353
10	ACV (25%)	Water	R	10:57:00	3	10	6	65	-0.797297	65	6	0.797297
11	ACV (25%)	Water	L	11:01:00	2	11	51	7	0.733333	51	7	0.733333
12	ACV (25%)	Water	R	11:05:00	4	12	7	46	-0.684211	46	7	0.684211
13	1 Saccharomyces cerevisiae	Apple Juice Liquid, 100%, pH ~5.3 + 0.5% YE	L	11:30:00	9	13	53	20	0.402439	53	20	0.402439	0.506626
14	1 Saccharomyces cerevisiae	Apple Juice Liquid, 100%, pH ~5.3 + 0.5% YE	R	11:34:00	4	14	9	48	-0.639344	48	9	0.639344
15	1 Saccharomyces cerevisiae	Apple Juice Liquid, 100%, pH ~5.3 + 0.5% YE	L	11:38:00	3	15	45	9	0.631579	45	9	0.631579
16	1 Saccharomyces cerevisiae	Apple Juice Liquid, 100%, pH ~5.3 + 0.5% YE	R	11:42:00	4	16	16	53	-0.506849	53	16	0.506849
17	1 Saccharomyces cerevisiae	Apple Juice Liquid, 100%, pH ~5.3 + 0.5% YE	L	11:46:00	6	17	46	13	0.507692	46	13	0.507692
18	1 Saccharomyces cerevisiae	Apple Juice Liquid, 100%, pH ~5.3 + 0.5% YE	R	11:50:00	7	18	14	33	-0.351852	33	14	0.351852
19	17 Acetobacter malorum	Apple Juice Liquid, 100%, pH ~5.3 + 0.5% YE	L	12:15:00	6	19	29	27	0.0322581	29	27	0.0322581	0.159904
20	17 Acetobacter malorum	Apple Juice Liquid, 100%, pH ~5.3 + 0.5% YE	R	12:19:00	3	20	22	44	-0.318841	44	22	0.318841
21	17 Acetobacter malorum	Apple Juice Liquid, 100%, pH ~5.3 + 0.5% YE	L	12:23:00	3	21	32	25	0.116667	32	25	0.116667
22	17 Acetobacter malorum	Apple Juice Liquid, 100%, pH ~5.3 + 0.5% YE	R	12:27:00	8	22	29	28	0.0153846	28	29	-0.0153846
23	17 Acetobacter malorum	Apple Juice Liquid, 100%, pH ~5.3 + 0.5% YE	L	12:31:00	7	23	34	30	0.056338	34	30	0.056338
24	17 Acetobacter malorum	Apple Juice Liquid, 100%, pH ~5.3 + 0.5% YE	R	12:35:00	5	24	17	49	-0.450704	49	17	0.450704
25	1+17 grown together	Apple Juice Liquid, 100%, pH ~5.3 + 0.5% YE	L	13:00:00	5	25	57	9	0.676056	57	9	0.676056	0.654354
26	1+17 grown together	Apple Juice Liquid, 100%, pH ~5.3 + 0.5% YE	R	13:04:00	2	26	7	59	-0.764706	59	7	0.764706
27	1+17 grown together	Apple Juice Liquid, 100%, pH ~5.3 + 0.5% YE	L	13:08:00	1	27	47	10	0.637931	47	10	0.637931
28	1+17 grown together	Apple Juice Liquid, 100%, pH ~5.3 + 0.5% YE	R	13:12:00	0	28	8	54	-0.741935	54	8	0.741935
29	1+17 grown together	Apple Juice Liquid, 100%, pH ~5.3 + 0.5% YE	L	13:16:00	4	29	38	14	0.428571	38	14	0.428571
30	1+17 grown together	Apple Juice Liquid, 100%, pH ~5.3 + 0.5% YE	R	13:20:00	3	30	9	53	-0.676923	53	9	0.676923
31	1+17 grown individually and mixed	Apple Juice Liquid, 100%, pH ~5.3 + 0.5% YE	L	13:45:00	12	31	44	14	0.428571	44	14	0.428571	0.448108
32	1+17 grown individually and mixed	Apple Juice Liquid, 100%, pH ~5.3 + 0.5% YE	R	13:49:00	10	32	15	33	-0.310345	33	15	0.310345
33	1+17 grown individually and mixed	Apple Juice Liquid, 100%, pH ~5.3 + 0.5% YE	L	13:53:00	1	33	37	14	0.442308	37	14	0.442308
34	1+17 grown individually and mixed	Apple Juice Liquid, 100%, pH ~5.3 + 0.5% YE	R	13:57:00	3	34	16	42	-0.42623	42	16	0.42623
35	1+17 grown individually and mixed	Apple Juice Liquid, 100%, pH ~5.3 + 0.5% YE	L	14:01:00	6	35	46	11	0.555556	46	11	0.555556
36	1+17 grown individually and mixed	Apple Juice Liquid, 100%, pH ~5.3 + 0.5% YE	R	14:05:00	7	36	15	56	-0.525641	56	15	0.525641

## Sheet: Exp2
Experiment #	Test Arm	Control Arm	Test Side	Time_Experiment	Center Flies	Experiment #	Left Arm	Right Arm	Left Side RI	Test Arm	Control Arm	Test Arm RI
1	Mock (empty tube)	Mock (empty tube)	L	10:00:00	9	1	23	21	0.0377358	23	21	0.0377358	0.0314008
2	Mock (empty tube)	Mock (empty tube)	R	10:05:00	5	2	34	23	0.177419	23	34	-0.177419
3	Mock (empty tube)	Mock (empty tube)	L	10:10:00	7	3	23	23	0	23	23	0
4	Mock (empty tube)	Mock (empty tube)	R	10:15:00	11	4	20	27	-0.12069	27	20	0.12069
5	Mock (empty tube)	Mock (empty tube)	L	10:20:00	9	5	34	23	0.166667	34	23	0.166667
6	Mock (empty tube)	Mock (empty tube)	R	10:25:00	7	6	22	26	-0.0727273	26	22	0.0727273
7	ACV (25%)	Water	L	10:30:00	3	7	44	15	0.467742	44	15	0.467742	0.616381
8	ACV (25%)	Water	R	10:35:00	4	8	9	40	-0.584906	40	9	0.584906
9	ACV (25%)	Water	L	10:40:00	2	9	52	3	0.859649	52	3	0.859649
10	ACV (25%)	Water	R	10:45:00	4	10	17	48	-0.449275	48	17	0.449275
11	ACV (25%)	Water	L	10:50:00	8	11	45	5	0.689655	45	5	0.689655
12	ACV (25%)	Water	R	10:55:00	2	12	11	55	-0.647059	55	11	0.647059
13	Benzaldehyde (-2)	Paraffin Oil	L	11:00:00	4	13	1	46	-0.882353	1	46	-0.882353	-0.82831
14	Benzaldehyde (-2)	Paraffin Oil	R	11:05:00	1	14	57	4	0.854839	4	57	-0.854839
15	Benzaldehyde (-2)	Paraffin Oil	L	11:10:00	11	15	3	37	-0.666667	3	37	-0.666667
16	Benzaldehyde (-2)	Paraffin Oil	R	11:15:00	2	16	55	1	0.931034	1	55	-0.931034
17	Benzaldehyde (-2)	Paraffin Oil	L	11:20:00	0	17	3	62	-0.907692	3	62	-0.907692
18	Benzaldehyde (-2)	Paraffin Oil	R	11:25:00	1	18	47	7	0.727273	7	47	-0.727273
19	1 Saccharomyces cerevisiae	Apple Juice Liquid, 100%, pH ~5.3 + 0.5% YE	L	11:50:00	10	19	39	12	0.442623	39	12	0.442623	0.3945
20	1 Saccharomyces cerevisiae	Apple Juice Liquid, 100%, pH ~5.3 + 0.5% YE	R	11:54:00	8	20	14	46	-0.470588	46	14	0.470588
21	1 Saccharomyces cerevisiae	Apple Juice Liquid, 100%, pH ~5.3 + 0.5% YE	L	11:58:00	8	21	27	19	0.148148	27	19	0.148148
22	1 Saccharomyces cerevisiae	Apple Juice Liquid, 100%, pH ~5.3 + 0.5% YE	R	12:02:00	11	22	17	40	-0.338235	40	17	0.338235
23	1 Saccharomyces cerevisiae	Apple Juice Liquid, 100%, pH ~5.3 + 0.5% YE	L	12:06:00	6	23	35	13	0.407407	35	13	0.407407
24	1 Saccharomyces cerevisiae	Apple Juice Liquid, 100%, pH ~5.3 + 0.5% YE	R	12:10:00	2	24	10	38	-0.56	38	10	0.56
25	17 Acetobacter malorum	Apple Juice Liquid, 100%, pH ~5.3 + 0.5% YE	L	12:35:00	4	25	40	18	0.354839	40	18	0.354839	0.20215
26	17 Acetobacter malorum	Apple Juice Liquid, 100%, pH ~5.3 + 0.5% YE	R	12:39:00	6	26	17	36	-0.322034	36	17	0.322034
27	17 Acetobacter malorum	Apple Juice Liquid, 100%, pH ~5.3 + 0.5% YE	L	12:43:00	4	27	28	20	0.153846	28	20	0.153846
28	17 Acetobacter malorum	Apple Juice Liquid, 100%, pH ~5.3 + 0.5% YE	R	12:47:00	5	28	23	26	-0.0555556	26	23	0.0555556
29	17 Acetobacter malorum	Apple Juice Liquid, 100%, pH ~5.3 + 0.5% YE	L	12:51:00	4	29	27	14	0.288889	27	14	0.288889
30	17 Acetobacter malorum	Apple Juice Liquid, 100%, pH ~5.3 + 0.5% YE	R	12:55:00	7	30	22	24	-0.0377358	24	22	0.0377358
31	1+17 grown together	Apple Juice Liquid, 100%, pH ~5.3 + 0.5% YE	L	13:20:00	2	31	59	6	0.791045	59	6	0.791045	0.739808
32	1+17 grown together	Apple Juice Liquid, 100%, pH ~5.3 + 0.5% YE	R	13:24:00	2	32	6	58	-0.787879	58	6	0.787879
33	1+17 grown together	Apple Juice Liquid, 100%, pH ~5.3 + 0.5% YE	L	13:28:00	3	33	50	7	0.716667	50	7	0.716667
34	1+17 grown together	Apple Juice Liquid, 100%, pH ~5.3 + 0.5% YE	R	13:32:00	1	34	8	53	-0.725806	53	8	0.725806
35	1+17 grown together	Apple Juice Liquid, 100%, pH ~5.3 + 0.5% YE	L	13:36:00	1	35	47	5	0.792453	47	5	0.792453
36	1+17 grown together	Apple Juice Liquid, 100%, pH ~5.3 + 0.5% YE	R	13:40:00	4	36	7	37	-0.625	37	7	0.625
37	1+17 grown individually and mixed	Apple Juice Liquid, 100%, pH ~5.3 + 0.5% YE	L	14:05:00	2	37	43	7	0.692308	43	7	0.692308	0.50221
38	1+17 grown individually and mixed	Apple Juice Liquid, 100%, pH ~5.3 + 0.5% YE	R	14:09:00	2	38	20	45	-0.373134	45	20	0.373134
39	1+17 grown individually and mixed	Apple Juice Liquid, 100%, pH ~5.3 + 0.5% YE	L	14:13:00	7	39	27	12	0.326087	27	12	0.326087
40	1+17 grown individually and mixed	Apple Juice Liquid, 100%, pH ~5.3 + 0.5% YE	R	14:17:00	4	40	15	44	-0.460317	44	15	0.460317
41	1+17 grown individually and mixed	Apple Juice Liquid, 100%, pH ~5.3 + 0.5% YE	L	14:21:00	4	41	48	13	0.538462	48	13	0.538462
42	1+17 grown individually and mixed	Apple Juice Liquid, 100%, pH ~5.3 + 0.5% YE	R	14:25:00	1	42	11	49	-0.622951	49	11	0.622951

## Sheet: Exp3
Experiment #	Test Arm	Control Arm	Test Side	Time_Experiment	Center Flies	Experiment #	Left Arm	Right Arm	Left Side RI	Test Arm	Control Arm	Test Arm RI
1	Mock (empty tube)	Mock (empty tube)	L	10:00:00	7	1	30	35	-0.0694444	30	35	-0.0694444	-0.0538051
2	Mock (empty tube)	Mock (empty tube)	R	10:05:00	8	2	36	32	0.0526316	32	36	-0.0526316
3	Mock (empty tube)	Mock (empty tube)	L	10:10:00	4	3	33	33	0	33	33	0
4	Mock (empty tube)	Mock (empty tube)	R	10:15:00	13	4	16	27	-0.196429	27	16	0.196429
5	Mock (empty tube)	Mock (empty tube)	L	10:20:00	9	5	28	36	-0.109589	28	36	-0.109589
6	Mock (empty tube)	Mock (empty tube)	R	10:25:00	7	6	32	32	0	32	32	0
7	ACV (25%)	Water	L	10:30:00	6	7	70	8	0.738095	70	8	0.738095	0.746638
8	ACV (25%)	Water	R	10:35:00	4	8	8	53	-0.692308	53	8	0.692308
9	ACV (25%)	Water	L	10:40:00	3	9	55	8	0.712121	55	8	0.712121
10	ACV (25%)	Water	R	10:45:00	4	10	2	58	-0.875	58	2	0.875
11	ACV (25%)	Water	L	10:50:00	1	11	49	6	0.767857	49	6	0.767857
12	ACV (25%)	Water	R	10:55:00	2	12	10	60	-0.694444	60	10	0.694444
13	Benzaldehyde (-2)	Paraffin Oil	L	11:00:00	7	13	4	61	-0.791667	4	61	-0.791667	-0.82117
14	Benzaldehyde (-2)	Paraffin Oil	R	11:05:00	5	14	66	3	0.851351	3	66	-0.851351
15	Benzaldehyde (-2)	Paraffin Oil	L	11:10:00	6	15	1	56	-0.873016	1	56	-0.873016
16	Benzaldehyde (-2)	Paraffin Oil	R	11:15:00	4	16	55	6	0.753846	6	55	-0.753846
17	Benzaldehyde (-2)	Paraffin Oil	L	11:20:00	2	17	3	51	-0.857143	3	51	-0.857143
18	Benzaldehyde (-2)	Paraffin Oil	R	11:25:00	4	18	61	5	0.8	5	61	-0.8
19	1 Saccharomyces cerevisiae	Apple Juice Liquid, 100%, pH ~5.3 + 0.5% YE	L	11:50:00		19			#DIV/0!	0	0	#DIV/0!	0.458228
20	1 Saccharomyces cerevisiae	Apple Juice Liquid, 100%, pH ~5.3 + 0.5% YE	R	11:54:00	4	20	11	46	-0.57377	46	11	0.57377
21	1 Saccharomyces cerevisiae	Apple Juice Liquid, 100%, pH ~5.3 + 0.5% YE	L	11:58:00	2	21	48	9	0.661017	48	9	0.661017
22	1 Saccharomyces cerevisiae	Apple Juice Liquid, 100%, pH ~5.3 + 0.5% YE	R	12:02:00	6	22	16	40	-0.387097	40	16	0.387097
23	1 Saccharomyces cerevisiae	Apple Juice Liquid, 100%, pH ~5.3 + 0.5% YE	L	12:06:00	7	23	43	19	0.347826	43	19	0.347826
24	1 Saccharomyces cerevisiae	Apple Juice Liquid, 100%, pH ~5.3 + 0.5% YE	R	12:10:00	6	24	16	34	-0.321429	34	16	0.321429
25	17 Acetobacter malorum	Apple Juice Liquid, 100%, pH ~5.3 + 0.5% YE	L	12:35:00	3	25	34	27	0.109375	34	27	0.109375	0.267368
26	17 Acetobacter malorum	Apple Juice Liquid, 100%, pH ~5.3 + 0.5% YE	R	12:39:00	10	26	22	38	-0.228571	38	22	0.228571
27	17 Acetobacter malorum	Apple Juice Liquid, 100%, pH ~5.3 + 0.5% YE	L	12:43:00	5	27	31	17	0.264151	31	17	0.264151
28	17 Acetobacter malorum	Apple Juice Liquid, 100%, pH ~5.3 + 0.5% YE	R	12:47:00	6	28	11	33	-0.44	33	11	0.44
29	17 Acetobacter malorum	Apple Juice Liquid, 100%, pH ~5.3 + 0.5% YE	L	12:51:00	6	29	35	18	0.288136	35	18	0.288136
30	17 Acetobacter malorum	Apple Juice Liquid, 100%, pH ~5.3 + 0.5% YE	R	12:55:00	9	30	22	42	-0.273973	42	22	0.273973
31	1+17 grown together	Apple Juice Liquid, 100%, pH ~5.3 + 0.5% YE	L	13:20:00	4	31	60	11	0.653333	60	11	0.653333	0.706961
32	1+17 grown together	Apple Juice Liquid, 100%, pH ~5.3 + 0.5% YE	R	13:24:00	3	32	14	71	-0.647727	71	14	0.647727
33	1+17 grown together	Apple Juice Liquid, 100%, pH ~5.3 + 0.5% YE	L	13:28:00	4	33	49	6	0.728814	49	6	0.728814
34	1+17 grown together	Apple Juice Liquid, 100%, pH ~5.3 + 0.5% YE	R	13:32:00	2	34	3	55	-0.866667	55	3	0.866667
35	1+17 grown together	Apple Juice Liquid, 100%, pH ~5.3 + 0.5% YE	L	13:36:00	6	35	46	7	0.661017	46	7	0.661017
36	1+17 grown together	Apple Juice Liquid, 100%, pH ~5.3 + 0.5% YE	R	13:40:00	8	36	8	60	-0.684211	60	8	0.684211
37	1+17 grown individually and mixed	Apple Juice Liquid, 100%, pH ~5.3 + 0.5% YE	L	14:05:00	5	37	69	12	0.662791	69	12	0.662791	0.545456
38	1+17 grown individually and mixed	Apple Juice Liquid, 100%, pH ~5.3 + 0.5% YE	R	14:09:00	7	38	15	64	-0.569767	64	15	0.569767
39	1+17 grown individually and mixed	Apple Juice Liquid, 100%, pH ~5.3 + 0.5% YE	L	14:13:00	13	39	53	12	0.525641	53	12	0.525641
40	1+17 grown individually and mixed	Apple Juice Liquid, 100%, pH ~5.3 + 0.5% YE	R	14:17:00	9	40	9	46	-0.578125	46	9	0.578125
41	1+17 grown individually and mixed	Apple Juice Liquid, 100%, pH ~5.3 + 0.5% YE	L	14:21:00	12	41	37	16	0.323077	37	16	0.323077
42	1+17 grown individually and mixed	Apple Juice Liquid, 100%, pH ~5.3 + 0.5% YE	R	14:25:00	9	42	10	56	-0.613333	56	10	0.613333

## Sheet: Exp4
Experiment #	Test Arm	Control Arm	Test Side	Time_Experiment	Center Flies	Experiment #	Left Arm	Right Arm	Left Side RI	Test Arm	Control Arm	Test Arm RI
1	Mock (empty tube)	Mock (empty tube)	L	10:00:00	12	1	21	30	-0.142857	21	30	-0.142857	-0.0498716
2	Mock (empty tube)	Mock (empty tube)	R	10:05:00	14	2	34	35	-0.0120482	35	34	0.0120482
3	Mock (empty tube)	Mock (empty tube)	L	10:10:00	14	3	26	34	-0.108108	26	34	-0.108108
4	Mock (empty tube)	Mock (empty tube)	R	10:15:00	8	4	32	26	0.0909091	26	32	-0.0909091
5	Mock (empty tube)	Mock (empty tube)	L	10:20:00	7	5	30	28	0.0307692	30	28	0.0307692
6	Mock (empty tube)	Mock (empty tube)	R	10:25:00	8	6	20	29	-0.157895	29	20	0.157895
7	ACV (25%)	Water	L	10:30:00	3	7	56	9	0.691176	56	9	0.691176	0.635101
8	ACV (25%)	Water	R	10:35:00	0	8	10	55	-0.692308	55	10	0.692308
9	ACV (25%)	Water	L	10:40:00	3	9	58	9	0.7	58	9	0.7
10	ACV (25%)	Water	R	10:45:00	2	10	7	40	-0.673469	40	7	0.673469
11	ACV (25%)	Water	L	10:50:00	6	11	53	12	0.577465	53	12	0.577465
12	ACV (25%)	Water	R	10:55:00	5	12	14	44	-0.47619	44	14	0.47619
13	Benzaldehyde (-2)	Paraffin Oil	L	11:00:00	11	13	3	50	-0.734375	3	50	-0.734375	-0.650093
14	Benzaldehyde (-2)	Paraffin Oil	R	11:05:00	10	14	47	5	0.677419	5	47	-0.677419
15	Benzaldehyde (-2)	Paraffin Oil	L	11:10:00	12	15	1	44	-0.754386	1	44	-0.754386
16	Benzaldehyde (-2)	Paraffin Oil	R	11:15:00	17	16	37	10	0.421875	10	37	-0.421875
17	Benzaldehyde (-2)	Paraffin Oil	L	11:20:00	13	17	7	44	-0.578125	7	44	-0.578125
18	Benzaldehyde (-2)	Paraffin Oil	R	11:25:00	13	18	49	2	0.734375	2	49	-0.734375
19	1 Saccharomyces cerevisiae	Apple Juice Liquid, 100%, pH ~5.3 + 0.5% YE	L	11:50:00	10	19	40	15	0.384615	40	15	0.384615	0.453217
20	1 Saccharomyces cerevisiae	Apple Juice Liquid, 100%, pH ~5.3 + 0.5% YE	R	11:54:00	6	20	13	55	-0.567568	55	13	0.567568
21	1 Saccharomyces cerevisiae	Apple Juice Liquid, 100%, pH ~5.3 + 0.5% YE	L	11:58:00	7	21	42	20	0.318841	42	20	0.318841
22	1 Saccharomyces cerevisiae	Apple Juice Liquid, 100%, pH ~5.3 + 0.5% YE	R	12:02:00	10	22	11	37	-0.448276	37	11	0.448276
23	1 Saccharomyces cerevisiae	Apple Juice Liquid, 100%, pH ~5.3 + 0.5% YE	L	12:06:00	8	23	45	11	0.53125	45	11	0.53125
24	1 Saccharomyces cerevisiae	Apple Juice Liquid, 100%, pH ~5.3 + 0.5% YE	R	12:10:00	8	24	13	43	-0.46875	43	13	0.46875
25	17 Acetobacter malorum	Apple Juice Liquid, 100%, pH ~5.3 + 0.5% YE	L	12:35:00	8	25	28	27	0.015873	28	27	0.015873	0.0949269
26	17 Acetobacter malorum	Apple Juice Liquid, 100%, pH ~5.3 + 0.5% YE	R	12:39:00	12	26	18	39	-0.304348	39	18	0.304348
27	17 Acetobacter malorum	Apple Juice Liquid, 100%, pH ~5.3 + 0.5% YE	L	12:43:00	10	27	31	35	-0.0526316	31	35	-0.0526316
28	17 Acetobacter malorum	Apple Juice Liquid, 100%, pH ~5.3 + 0.5% YE	R	12:47:00	14	28	25	30	-0.0724638	30	25	0.0724638
29	17 Acetobacter malorum	Apple Juice Liquid, 100%, pH ~5.3 + 0.5% YE	L	12:51:00	6	29	28	27	0.0163934	28	27	0.0163934
30	17 Acetobacter malorum	Apple Juice Liquid, 100%, pH ~5.3 + 0.5% YE	R	12:55:00	8	30	20	33	-0.213115	33	20	0.213115
31	1+17 grown together	Apple Juice Liquid, 100%, pH ~5.3 + 0.5% YE	L	13:20:00	14	31	53	13	0.5	53	13	0.5	0.630099
32	1+17 grown together	Apple Juice Liquid, 100%, pH ~5.3 + 0.5% YE	R	13:24:00	7	32	18	68	-0.537634	68	18	0.537634
33	1+17 grown together	Apple Juice Liquid, 100%, pH ~5.3 + 0.5% YE	L	13:28:00	7	33	54	12	0.575342	54	12	0.575342
34	1+17 grown together	Apple Juice Liquid, 100%, pH ~5.3 + 0.5% YE	R	13:32:00	4	34	6	46	-0.714286	46	6	0.714286
35	1+17 grown together	Apple Juice Liquid, 100%, pH ~5.3 + 0.5% YE	L	13:36:00	5	35	56	4	0.8	56	4	0.8
36	1+17 grown together	Apple Juice Liquid, 100%, pH ~5.3 + 0.5% YE	R	13:40:00	2	36	12	61	-0.653333	61	12	0.653333
37	1+17 grown individually and mixed	Apple Juice Liquid, 100%, pH ~5.3 + 0.5% YE	L	14:05:00	8	37	43	11	0.516129	43	11	0.516129	0.50474
38	1+17 grown individually and mixed	Apple Juice Liquid, 100%, pH ~5.3 + 0.5% YE	R	14:09:00	11	38	7	64	-0.695122	64	7	0.695122
39	1+17 grown individually and mixed	Apple Juice Liquid, 100%, pH ~5.3 + 0.5% YE	L	14:13:00	9	39	41	15	0.4	41	15	0.4
40	1+17 grown individually and mixed	Apple Juice Liquid, 100%, pH ~5.3 + 0.5% YE	R	14:17:00	8	40	11	47	-0.545455	47	11	0.545455
41	1+17 grown individually and mixed	Apple Juice Liquid, 100%, pH ~5.3 + 0.5% YE	L	14:21:00	10	41	44	14	0.441176	44	14	0.441176
42	1+17 grown individually and mixed	Apple Juice Liquid, 100%, pH ~5.3 + 0.5% YE	R	14:25:00	11	42	15	46	-0.430556	46	15	0.430556

## Sheet: Exp5
Experiment #	Test Arm	Control Arm	Test Side	Time_Experiment	Center Flies	Experiment #	Left Arm	Right Arm	Left Side RI	Test Arm	Control Arm	Test Arm RI
1	Mock (empty tube)	Mock (empty tube)	L	10:00:00	8	1	33	26	0.104478	33	26	0.104478	-0.0355013
2	Mock (empty tube)	Mock (empty tube)	R	10:05:00	9	2	21	27	-0.105263	27	21	0.105263
3	Mock (empty tube)	Mock (empty tube)	L	10:10:00	16	3	26	39	-0.160494	26	39	-0.160494
4	Mock (empty tube)	Mock (empty tube)	R	10:15:00	11	4	26	18	0.145455	18	26	-0.145455
5	Mock (empty tube)	Mock (empty tube)	L	10:20:00	8	5	27	36	-0.126761	27	36	-0.126761
6	Mock (empty tube)	Mock (empty tube)	R	10:25:00	8	6	29	34	-0.0704225	34	29	0.0704225
7	ACV (25%)	Water	L	10:30:00	7	7	45	7	0.644068	45	7	0.644068	0.581992
8	ACV (25%)	Water	R	10:35:00	7	8	3	40	-0.74	40	3	0.74
9	ACV (25%)	Water	L	10:40:00	2	9	52	12	0.606061	52	12	0.606061
10	ACV (25%)	Water	R	10:45:00	9	10	20	45	-0.337838	45	20	0.337838
11	ACV (25%)	Water	L	10:50:00		11			#DIV/0!	0	0	#DIV/0!
12	ACV (25%)	Water	R	10:55:00		12			#DIV/0!	0	0	#DIV/0!
13	1 Saccharomyces cerevisiae	Apple Juice Liquid, 100%, pH ~5.3 + 0.5% YE	L	10:00:00	7	13	50	14	0.507042	50	14	0.507042	0.30942
14	1 Saccharomyces cerevisiae	Apple Juice Liquid, 100%, pH ~5.3 + 0.5% YE	R	10:05:00	10	14	19	45	-0.351351	45	19	0.351351
15	1 Saccharomyces cerevisiae	Apple Juice Liquid, 100%, pH ~5.3 + 0.5% YE	L	10:10:00	7	15	33	22	0.177419	33	22	0.177419
16	1 Saccharomyces cerevisiae	Apple Juice Liquid, 100%, pH ~5.3 + 0.5% YE	R	10:15:00	10	16	13	40	-0.428571	40	13	0.428571
17	1 Saccharomyces cerevisiae	Apple Juice Liquid, 100%, pH ~5.3 + 0.5% YE	L	10:20:00	8	17	34	16	0.310345	34	16	0.310345
18	1 Saccharomyces cerevisiae	Apple Juice Liquid, 100%, pH ~5.3 + 0.5% YE	R	10:25:00	7	18	21	40	-0.279412	40	21	0.279412
19	17 Acetobacter malorum	Apple Juice Liquid, 100%, pH ~5.3 + 0.5% YE	L	10:30:00	7	19	29	30	-0.0151515	29	30	-0.0151515	0.0882975
20	17 Acetobacter malorum	Apple Juice Liquid, 100%, pH ~5.3 + 0.5% YE	R	10:35:00	9	20	21	34	-0.203125	34	21	0.203125
21	17 Acetobacter malorum	Apple Juice Liquid, 100%, pH ~5.3 + 0.5% YE	L	10:40:00	7	21	36	36	0	36	36	0
22	17 Acetobacter malorum	Apple Juice Liquid, 100%, pH ~5.3 + 0.5% YE	R	10:45:00	9	22	24	29	-0.0806452	29	24	0.0806452
23	17 Acetobacter malorum	Apple Juice Liquid, 100%, pH ~5.3 + 0.5% YE	L	10:50:00	5	23	24	23	0.0192308	24	23	0.0192308
24	17 Acetobacter malorum	Apple Juice Liquid, 100%, pH ~5.3 + 0.5% YE	R	10:55:00	9	24	19	34	-0.241935	34	19	0.241935
25	1+17 grown together	Apple Juice Liquid, 100%, pH ~5.3 + 0.5% YE	L	11:20:00	3	25	42	7	0.673077	42	7	0.673077	0.636923
26	1+17 grown together	Apple Juice Liquid, 100%, pH ~5.3 + 0.5% YE	R	11:24:00	4	26	11	54	-0.623188	54	11	0.623188
27	1+17 grown together	Apple Juice Liquid, 100%, pH ~5.3 + 0.5% YE	L	11:28:00	4	27	58	5	0.791045	58	5	0.791045
28	1+17 grown together	Apple Juice Liquid, 100%, pH ~5.3 + 0.5% YE	R	11:32:00	3	28	14	44	-0.491803	44	14	0.491803
29	1+17 grown together	Apple Juice Liquid, 100%, pH ~5.3 + 0.5% YE	L	11:36:00	5	29	55	6	0.742424	55	6	0.742424
30	1+17 grown together	Apple Juice Liquid, 100%, pH ~5.3 + 0.5% YE	R	11:40:00	2	30	17	53	-0.5	53	17	0.5
31	1+17 grown individually and mixed	Apple Juice Liquid, 100%, pH ~5.3 + 0.5% YE	L	12:05:00	6	31	45	14	0.476923	45	14	0.476923	0.428163
32	1+17 grown individually and mixed	Apple Juice Liquid, 100%, pH ~5.3 + 0.5% YE	R	12:09:00	5	32	13	35	-0.415094	35	13	0.415094
33	1+17 grown individually and mixed	Apple Juice Liquid, 100%, pH ~5.3 + 0.5% YE	L	12:13:00	8	33	34	15	0.333333	34	15	0.333333
34	1+17 grown individually and mixed	Apple Juice Liquid, 100%, pH ~5.3 + 0.5% YE	R	12:17:00	7	34	13	36	-0.410714	36	13	0.410714
35	1+17 grown individually and mixed	Apple Juice Liquid, 100%, pH ~5.3 + 0.5% YE	L	12:21:00	7	35	33	13	0.377358	33	13	0.377358
36	1+17 grown individually and mixed	Apple Juice Liquid, 100%, pH ~5.3 + 0.5% YE	R	12:25:00	10	36	13	58	-0.555556	58	13	0.555556
