# Supplementary material for: Metabolite exchange between microbiome members produces compounds that influence Drosophila behavior
Source: eLife. 2017 Jan 9;6:e18855. doi: 10.7554/eLife.18855 (PMC5222558; doi:10.7554/eLife.18855)
Supplement: Figure 2—figure supplement 1—source data 1. — DOI: http://dx.doi.org/10.7554/eLife.18855.013 [file elife-18855-fig2-figsupp1-data1.xlsx]

## Sheet: Tuesday_9_20
Experiment #	Fly Strain	Test Arm	Control Arm	Test Side	Time_Experiment	Inoc_Time Test	Inoc_Time Control	Center Flies	Experiment #	Left side	right side	Left Side RI	Test Arm	Control Arm	Test Arm RI		# Flies	Average
1	Canton-S (CR)	Mock	Mock	L	08:00:00	NA	NA	7	1	25	23	0.0363636	25	23	0.0363636	0.0406001	55	51.1667
2	Canton-S (CR)	Mock	Mock	R	08:05:00			3	2	16	23	-0.166667	23	16	0.166667		42
3	Canton-S (CR)	Mock	Mock	L	08:10:00			4	3	28	28	0	28	28	0		60
4	Canton-S (CR)	Mock	Mock	R	08:15:00			4	4	29	22	0.127273	22	29	-0.127273		55
5	Canton-S (CR)	Mock	Mock	L	08:20:00			9	5	37	18	0.296875	37	18	0.296875		64
6	Canton-S (CR)	Mock	Mock	R	08:25:00			5	6	15	11	0.129032	11	15	-0.129032		31
7	Canton-S (CR)	SCAM72	SC + Am 34	L	08:50:00	Sat 8AM	Sun 10pm	0	7	41	11	0.576923	41	11	0.576923	0.53389	52	68.3333
8	Canton-S (CR)	SCAM72	SC + Am 34	R	08:55:00	Friday: 4pm O/N	Sun: 6AM O/N	3	8	15	50	-0.514706	50	15	0.514706		68
9	Canton-S (CR)	SCAM72	SC + Am 34	L	09:00:00			4	9	44	25	0.260274	44	25	0.260274		73
10	Canton-S (CR)	SCAM72	SC + Am 34	R	09:05:00			2	10	19	52	-0.452055	52	19	0.452055		73
11	Canton-S (CR)	SCAM72	SC + Am 34	L	09:10:00			5	11	64	4	0.821918	64	4	0.821918		73
12	Canton-S (CR)	SCAM72	SC + Am 34	R	09:15:00			4	12	13	54	-0.577465	54	13	0.577465		71
13	Canton-S (CR)	SCAM72	SC 34	L	09:40:00	Sat 8AM	Sun 10pm	6	13	51	21	0.384615	51	21	0.384615	0.604518	78	68.6667
14	Canton-S (CR)	SCAM72	SC 34	R	09:45:00	Friday: 4pm O/N	Sun: 6AM O/N	4	14	12	45	-0.540984	45	12	0.540984		61
15	Canton-S (CR)	SCAM72	SC 34	L	09:50:00			5	15	55	6	0.742424	55	6	0.742424		66
16	Canton-S (CR)	SCAM72	SC 34	R	09:55:00			1	16	10	57	-0.691176	57	10	0.691176		68
17	Canton-S (CR)	SCAM72	SC 34	L	10:00:00			3	17	59	7	0.753623	59	7	0.753623		69
18	Canton-S (CR)	SCAM72	SC 34	R	10:05:00			6	18	14	50	-0.514286	50	14	0.514286		70
19	Canton-S (CR)	SCAM72	Am 34	L	10:30:00	Sat 8AM	Sun 10pm	1	19	63	11	0.693333	63	11	0.693333	0.564298	75	68.5
20	Canton-S (CR)	SCAM72	Am 34	R	10:35:00	Friday: 4pm O/N	Sun: 6AM O/N	5	20	14	64	-0.60241	64	14	0.60241		83
21	Canton-S (CR)	SCAM72	Am 34	L	10:40:00			3	21	49	10	0.629032	49	10	0.629032		62
22	Canton-S (CR)	SCAM72	Am 34	R	10:45:00			4	22	12	45	-0.540984	45	12	0.540984		61
23	Canton-S (CR)	SCAM72	Am 34	L	10:50:00			1	23	47	11	0.610169	47	11	0.610169		59
24	Canton-S (CR)	SCAM72	Am 34	R	10:55:00			3	24	23	45	-0.309859	45	23	0.309859		71
25	Canton-S (CR)	SCAM72	SC + Am 72	L	11:20:00	Sat 10:30AM	Sat 10:30AM	6	25	36	32	0.0540541	36	32	0.0540541	0.26007	74	65.6667
26	Canton-S (CR)	SCAM72	SC + Am 72	R	11:25:00	Fri: 4PM O/N	Fri: 4PM O/N	5	26	16	34	-0.327273	34	16	0.327273		55
27	Canton-S (CR)	SCAM72	SC + Am 72	L	11:30:00			6	27	32	13	0.372549	32	13	0.372549		51
28	Canton-S (CR)	SCAM72	SC + Am 72	R	11:35:00			6	28	18	45	-0.391304	45	18	0.391304		69
29	Canton-S (CR)	SCAM72	SC + Am 72	L	11:40:00			8	29	39	23	0.228571	39	23	0.228571		70
30	Canton-S (CR)	SCAM72	SC + Am 72	R	11:45:00			7	30	27	41	-0.186667	41	27	0.186667		75
31	Canton-S (CR)	SCAM72	SC 72	L	12:10:00	Sat 10:30AM	Sat 10:30AM	4	31	46	18	0.411765	46	18	0.411765	0.358599	68	68.8333
32	Canton-S (CR)	SCAM72	SC 72	R	12:15:00	Fri: 4PM O/N	Fri: 4PM O/N	2	32	19	50	-0.43662	50	19	0.43662		71
33	Canton-S (CR)	SCAM72	SC 72	L	12:20:00			5	33	40	18	0.349206	40	18	0.349206		63
34	Canton-S (CR)	SCAM72	SC 72	R	12:25:00			8	34	18	32	-0.241379	32	18	0.241379		58
35	Canton-S (CR)	SCAM72	SC 72	L	12:30:00			8	35	50	16	0.459459	50	16	0.459459		74
36	Canton-S (CR)	SCAM72	SC 72	R	12:35:00			9	36	25	45	-0.253165	45	25	0.253165		79
37	Canton-S (CR)	SCAM72	Am 72	L	13:00:00	Sat 10:30AM	Sat 10:30AM	5	37	52	12	0.57971	52	12	0.57971	0.626774	69	64.1667
38	Canton-S (CR)	SCAM72	Am 72	R	13:05:00	Fri: 4PM O/N	Fri: 4PM O/N	4	38	9	42	-0.6	42	9	0.6		55
39	Canton-S (CR)	SCAM72	Am 72	L	13:10:00			2	39	52	10	0.65625	52	10	0.65625		64
40	Canton-S (CR)	SCAM72	Am 72	R	13:15:00			3	40	11	51	-0.615385	51	11	0.615385		65
41	Canton-S (CR)	SCAM72	Am 72	L	13:20:00			3	41	59	3	0.861538	59	3	0.861538		65
42	Canton-S (CR)	SCAM72	Am 72	R	13:25:00			5	42	16	46	-0.447761	46	16	0.447761		67
43	Canton-S (CR)	SCAM72	SC + Am 24	L	13:50:00	Sat 1PM	Monday 1PM	4	43	53	17	0.486486	53	17	0.486486	0.573596	74	74.1667
44	Canton-S (CR)	SCAM72	SC + Am 24	R	13:55:00	Friday Inoc: 5 PM	Sunday Inoc: 5PM	3	44	14	58	-0.586667	58	14	0.586667		75
45	Canton-S (CR)	SCAM72	SC + Am 24	L	14:00:00			6	45	54	16	0.5	54	16	0.5		76
46	Canton-S (CR)	SCAM72	SC + Am 24	R	14:05:00			3	46	10	62	-0.693333	62	10	0.693333		75
47	Canton-S (CR)	SCAM72	SC + Am 24	L	14:10:00			5	47	47	10	0.596774	47	10	0.596774		62
48	Canton-S (CR)	SCAM72	SC + Am 24	R	14:15:00			3	48	16	64	-0.578313	64	16	0.578313		83
49	Canton-S (CR)	SCAM72	SC 24	L	14:40:00	Sat 1PM	Monday 1PM	6	49	60	13	0.594937	60	13	0.594937	0.557928	79	65.8333
50	Canton-S (CR)	SCAM72	SC 24	R	14:45:00	Friday Inoc: 5 PM	Sunday Inoc: 5PM	5	50	12	40	-0.491228	40	12	0.491228		57
51	Canton-S (CR)	SCAM72	SC 24	L	14:50:00			6	51	47	14	0.492537	47	14	0.492537		67
52	Canton-S (CR)	SCAM72	SC 24	R	14:55:00			5	52	13	48	-0.530303	48	13	0.530303		66
53	Canton-S (CR)	SCAM72	SC 24	L	15:00:00			9	53	52	13	0.527027	52	13	0.527027		74
54	Canton-S (CR)	SCAM72	SC 24	R	15:05:00			3	54	6	43	-0.711538	43	6	0.711538		52
55	Canton-S (CR)	SCAM72	Am 24	L	15:30:00	Sat 1PM	Monday 1PM	3	55	60	6	0.782609	60	6	0.782609	0.635123	69	73.3333
56	Canton-S (CR)	SCAM72	Am 24	R	15:35:00	Friday Inoc: 5 PM	Sunday Inoc: 5PM	5	56	12	59	-0.618421	59	12	0.618421		76
57	Canton-S (CR)	SCAM72	Am 24	L	15:40:00			7	57	59	11	0.623377	59	11	0.623377		77
58	Canton-S (CR)	SCAM72	Am 24	R	15:45:00			5	58	15	48	-0.485294	48	15	0.485294		68
59	Canton-S (CR)	SCAM72	Am 24	L	15:50:00			5	59	45	13	0.507937	45	13	0.507937		63
60	Canton-S (CR)	SCAM72	Am 24	R	15:55:00			4	60	7	76	-0.793103	76	7	0.793103		87
Population Dynamics
	Sc	Am	ScAm (Sc)_1	ScAm (Sc)_2	ScAm (Sc)_3	ScAm (Am)_1	ScAm (Am)_2	ScAm (Am)_3
0	8000	19600
24	36000000	17400000	20400000			37600000
34	115200000	86000000	32400000			120000000
72	121600000	42000000	0	0	0	1000000	2000000	1200000

## Sheet: Thursday_9_22
Experiment #	Fly Strain	Test Arm	Control Arm	Test Side	Time_Experiment	Inoc_Time Test	Inoc_Time Control	Center Flies	Experiment #	Left side	right side	Left Side RI	Test Arm	Control Arm	Test Arm RI		# Flies	Average
1	Canton-S (CR)	Mock	Mock	L	08:00:00	NA	NA	4	1	36	28	0.117647	36	28	0.117647	-0.0144307	68	68.1667
2	Canton-S (CR)	Mock	Mock	R	08:05:00			9	2	31	26	0.0757576	26	31	-0.0757576		66
3	Canton-S (CR)	Mock	Mock	L	08:10:00			4	3	34	35	-0.0136986	34	35	-0.0136986		73
4	Canton-S (CR)	Mock	Mock	R	08:15:00			7	4	40	29	0.144737	29	40	-0.144737		76
5	Canton-S (CR)	Mock	Mock	L	08:20:00			7	5	35	29	0.084507	35	29	0.084507		71
6	Canton-S (CR)	Mock	Mock	R	08:25:00			4	6	27	24	0.0545455	24	27	-0.0545455		55
7	Canton-S (CR)	SCAM72	SC + Am 34	L	08:50:00	Mon 8AM	Tue 10pm	2	7	40	14	0.464286	40	14	0.464286	0.373372	56	66.1667
8	Canton-S (CR)	SCAM72	SC + Am 34	R	08:55:00	Sun: 4pm O/N	Tue: 6AM O/N	0	8	26	44	-0.257143	44	26	0.257143		70
9	Canton-S (CR)	SCAM72	SC + Am 34	L	09:00:00			1	9	48	20	0.405797	48	20	0.405797		69
10	Canton-S (CR)	SCAM72	SC + Am 34	R	09:05:00			3	10	20	32	-0.218182	32	20	0.218182		55
11	Canton-S (CR)	SCAM72	SC + Am 34	L	09:10:00			1	11	48	19	0.426471	48	19	0.426471		68
12	Canton-S (CR)	SCAM72	SC + Am 34	R	09:15:00			6	12	18	55	-0.468354	55	18	0.468354		79
13	Canton-S (CR)	SCAM72	SC 34	L	09:40:00	Mon 8AM	Tue 10pm	1	13	54	7	0.758065	54	7	0.758065	0.682617	62	70
14	Canton-S (CR)	SCAM72	SC 34	R	09:45:00	Sun: 4pm O/N	Tue: 6AM O/N	6	14	7	59	-0.722222	59	7	0.722222		72
15	Canton-S (CR)	SCAM72	SC 34	L	09:50:00			3	15	65	13	0.641975	65	13	0.641975		81
16	Canton-S (CR)	SCAM72	SC 34	R	09:55:00			3	16	4	60	-0.835821	60	4	0.835821		67
17	Canton-S (CR)	SCAM72	SC 34	L	10:00:00			4	17	53	16	0.506849	53	16	0.506849		73
18	Canton-S (CR)	SCAM72	SC 34	R	10:05:00			4	18	10	51	-0.630769	51	10	0.630769		65
19	Canton-S (CR)	SCAM72	Am 34	L	10:30:00	Mon 8AM	Tue 10pm	6	19	54	5	0.753846	54	5	0.753846	0.505526	65	67.6667
20	Canton-S (CR)	SCAM72	Am 34	R	10:35:00	Sun: 4pm O/N	Tue: 6AM O/N	2	20	20	28	-0.16	28	20	0.16		50
21	Canton-S (CR)	SCAM72	Am 34	L	10:40:00			2	21	61	16	0.56962	61	16	0.56962		79
22	Canton-S (CR)	SCAM72	Am 34	R	10:45:00			3	22	27	47	-0.25974	47	27	0.25974		77
23	Canton-S (CR)	SCAM72	Am 34	L	10:50:00			3	23	56	8	0.716418	56	8	0.716418		67
24	Canton-S (CR)	SCAM72	Am 34	R	10:55:00			1	24	14	53	-0.573529	53	14	0.573529		68
25	Canton-S (CR)	SCAM72	SC + Am 72	L	11:20:00	Mon 8AM	Mon 8AM	5	25	40	28	0.164384	40	28	0.164384	0.23507	73	57.6667
26	Canton-S (CR)	SCAM72	SC + Am 72	R	11:25:00	Sun: 4pm O/N	Sun: 4pm O/N	6	26	20	40	-0.30303	40	20	0.30303		66
27	Canton-S (CR)	SCAM72	SC + Am 72	L	11:30:00				27			#DIV/0!	0	0	#DIV/0!		0
28	Canton-S (CR)	SCAM72	SC + Am 72	R	11:35:00			7	28	32	32	0	32	32	0		71
29	Canton-S (CR)	SCAM72	SC + Am 72	L	11:40:00			3	29	46	13	0.532258	46	13	0.532258		62
30	Canton-S (CR)	SCAM72	SC + Am 72	R	11:45:00			3	30	29	42	-0.175676	42	29	0.175676		74
31	Canton-S (CR)	SCAM72	SC 72	L	12:10:00	Mon 8AM	Mon 8AM	6	31	42	19	0.343284	42	19	0.343284	0.275303	67	66.6667
32	Canton-S (CR)	SCAM72	SC 72	R	12:15:00	Sun: 4pm O/N	Sun: 4pm O/N	6	32	25	44	-0.253333	44	25	0.253333		75
33	Canton-S (CR)	SCAM72	SC 72	L	12:20:00			3	33	33	21	0.210526	33	21	0.210526		57
34	Canton-S (CR)	SCAM72	SC 72	R	12:25:00			5	34	25	41	-0.225352	41	25	0.225352		71
35	Canton-S (CR)	SCAM72	SC 72	L	12:30:00			6	35	33	18	0.263158	33	18	0.263158		57
36	Canton-S (CR)	SCAM72	SC 72	R	12:35:00			7	36	20	46	-0.356164	46	20	0.356164		73
37	Canton-S (CR)	SCAM72	Am 72	L	13:00:00	Mon 8AM	Mon 8AM	3	37	38	15	0.410714	38	15	0.410714	0.569963	56	65.8333
38	Canton-S (CR)	SCAM72	Am 72	R	13:05:00	Sun: 4pm O/N	Sun: 4pm O/N	6	38	12	53	-0.577465	53	12	0.577465		71
39	Canton-S (CR)	SCAM72	Am 72	L	13:10:00			2	39	51	7	0.733333	51	7	0.733333		60
40	Canton-S (CR)	SCAM72	Am 72	R	13:15:00			2	40	17	53	-0.5	53	17	0.5		72
41	Canton-S (CR)	SCAM72	Am 72	L	13:20:00			1	41	60	9	0.728571	60	9	0.728571		70
42	Canton-S (CR)	SCAM72	Am 72	R	13:25:00			5	42	15	46	-0.469697	46	15	0.469697		66
43	Canton-S (CR)	SCAM72	SC + Am 24	L	13:50:00	Mon 1PM	Wed 1PM	6	43	38	15	0.389831	38	15	0.389831	0.497138	59	69.5
44	Canton-S (CR)	SCAM72	SC + Am 24	R	13:55:00	Sun Inoc: 5 PM	Tue Inoc: 5 PM	5	44	11	46	-0.564516	46	11	0.564516		62
45	Canton-S (CR)	SCAM72	SC + Am 24	L	14:00:00			2	45	58	14	0.594595	58	14	0.594595		74
46	Canton-S (CR)	SCAM72	SC + Am 24	R	14:05:00			5	46	19	45	-0.376812	45	19	0.376812		69
47	Canton-S (CR)	SCAM72	SC + Am 24	L	14:10:00			8	47	49	19	0.394737	49	19	0.394737		76
48	Canton-S (CR)	SCAM72	SC + Am 24	R	14:15:00			4	48	11	62	-0.662338	62	11	0.662338		77
49	Canton-S (CR)	SCAM72	SC 24	L	14:40:00	Mon 1PM	Wed 1PM	9	49	39	18	0.318182	39	18	0.318182	0.529	66	67.3333
50	Canton-S (CR)	SCAM72	SC 24	R	14:45:00	Sun Inoc: 5 PM	Tue Inoc: 5 PM	4	50	21	46	-0.352113	46	21	0.352113		71
51	Canton-S (CR)	SCAM72	SC 24	L	14:50:00			4	51	52	10	0.636364	52	10	0.636364		66
52	Canton-S (CR)	SCAM72	SC 24	R	14:55:00			3	52	9	56	-0.691176	56	9	0.691176		68
53	Canton-S (CR)	SCAM72	SC 24	L	15:00:00			2	53	45	20	0.373134	45	20	0.373134		67
54	Canton-S (CR)	SCAM72	SC 24	R	15:05:00			1	54	6	59	-0.80303	59	6	0.80303		66
55	Canton-S (CR)	SCAM72	Am 24	L	15:30:00	Mon 1PM	Wed 1PM	3	55	61	4	0.838235	61	4	0.838235	0.519645	68	69.3333
56	Canton-S (CR)	SCAM72	Am 24	R	15:35:00	Sun Inoc: 5 PM	Tue Inoc: 5 PM	1	56	13	52	-0.590909	52	13	0.590909		66
57	Canton-S (CR)	SCAM72	Am 24	L	15:40:00			2	57	53	12	0.61194	53	12	0.61194		67
58	Canton-S (CR)	SCAM72	Am 24	R	15:45:00			3	58	23	46	-0.319444	46	23	0.319444		72
59	Canton-S (CR)	SCAM72	Am 24	L	15:50:00			4	59	48	18	0.428571	48	18	0.428571		70
60	Canton-S (CR)	SCAM72	Am 24	R	15:55:00			1	60	24	48	-0.328767	48	24	0.328767		73
			Population Dynamics
				Sc	Am	ScAm (Sc)_1	ScAm (Sc)_2	ScAm (Sc)_3	ScAm (Am)_1	ScAm (Am)_2	ScAm (Am)_3
			0	2500	33000
			24	26000000	47600000	12400000			59200000
			34	65600000	360000000	81000000			72000000
			72	53600000	86000000	0	0	0	20000	72000	26000
