# Supplementary material for: Metabolite exchange between microbiome members produces compounds that influence Drosophila behavior
Source: eLife. 2017 Jan 9;6:e18855. doi: 10.7554/eLife.18855 (PMC5222558; doi:10.7554/eLife.18855)
Supplement: Figure 2—source data 1. — DOI: http://dx.doi.org/10.7554/eLife.18855.010 [file elife-18855-fig2-data1.xlsx]

## Sheet: Exp1
Experiment #	Fly Strain	Test Arm	Control Arm	Test Side	Time_Experiment	Center Flies	Experiment #	Left Arm	Right Arm	Left Side RI	Test Arm	Control Arm	Test Arm RI
1	Canton-S (WT)	Mock (empty tube)	Mock (empty tube)	L	08:00:00	13	1	20	27	-0.116667	20	27	-0.116667	0.0298144
2	Canton-S (WT)	Mock (empty tube)	Mock (empty tube)	R	08:05:00	8	2	28	19	0.163636	19	28	-0.163636	-0.0778218
3	Canton-S (WT)	Mock (empty tube)	Mock (empty tube)	L	08:10:00	5	3	17	25	-0.170213	17	25	-0.170213
4	Canton-S (WT)	Mock (empty tube)	Mock (empty tube)	R	08:15:00	13	4	32	28	0.0547945	28	32	-0.0547945
5	Canton-S (WT)	Mock (empty tube)	Mock (empty tube)	L	08:20:00	10	5	31	22	0.142857	31	22	0.142857
6	Canton-S (WT)	Mock (empty tube)	Mock (empty tube)	R	08:25:00	10	6	32	25	0.104478	25	32	-0.104478
7	Canton-S (WT)	Sc+Am (grown)-60 hours	AJM	L	09:15:00	3	7	55	8	0.712121	55	8	0.712121	0.568868
8	Canton-S (WT)	Sc+Am (grown)-60 hours	AJM	R	09:20:00	2	8	10	33	-0.511111	33	10	0.511111
9	Canton-S (WT)	Sc+Am (grown)-60 hours	AJM	L	09:25:00	2	9	51	11	0.625	51	11	0.625
10	Canton-S (WT)	Sc+Am (grown)-60 hours	AJM	R	09:30:00	1	10	12	49	-0.596774	49	12	0.596774
11	Canton-S (WT)	Sc+Am (grown)-60 hours	AJM	L	09:35:00	2	11	48	18	0.441176	48	18	0.441176
12	Canton-S (WT)	Sc+Am (grown)-60 hours	AJM	R	09:40:00	5	12	15	54	-0.527027	54	15	0.527027
13	Canton-S (WT)	Sc+Am (grown)-60 hours	Sc+Am (mixed after growing individually for 60 h)	L	09:45:00	5	13	50	26	0.296296	50	26	0.296296	0.462521
14	Canton-S (WT)	Sc+Am (grown)-60 hours	Sc+Am (mixed after growing individually for 60 h)	R	09:50:00	4	14	11	47	-0.580645	47	11	0.580645
15	Canton-S (WT)	Sc+Am (grown)-60 hours	Sc+Am (mixed after growing individually for 60 h)	L	09:55:00	6	15	44	12	0.516129	44	12	0.516129
16	Canton-S (WT)	Sc+Am (grown)-60 hours	Sc+Am (mixed after growing individually for 60 h)	R	10:00:00	5	16	14	50	-0.521739	50	14	0.521739
17	Canton-S (WT)	Sc+Am (grown)-60 hours	Sc+Am (mixed after growing individually for 60 h)	L	10:05:00	5	17	36	14	0.4	36	14	0.4
18	Canton-S (WT)	Sc+Am (grown)-60 hours	Sc+Am (mixed after growing individually for 60 h)	R	10:10:00	10	18	12	41	-0.460317	41	12	0.460317
19	Canton-S (WT)	Sc+Am (grown)-72 hours	AJM	L	10:45:00	6	19	55	15	0.526316	55	15	0.526316	0.673497
20	Canton-S (WT)	Sc+Am (grown)-72 hours	AJM	R	10:50:00	4	20	8	52	-0.6875	52	8	0.6875
21	Canton-S (WT)	Sc+Am (grown)-72 hours	AJM	L	10:55:00	1	21	53	9	0.698413	53	9	0.698413
22	Canton-S (WT)	Sc+Am (grown)-72 hours	AJM	R	11:00:00	7	22	9	57	-0.657534	57	9	0.657534
23	Canton-S (WT)	Sc+Am (grown)-72 hours	AJM	L	11:05:00	3	23	54	7	0.734375	54	7	0.734375
24	Canton-S (WT)	Sc+Am (grown)-72 hours	AJM	R	11:10:00	5	24	5	47	-0.736842	47	5	0.736842
25	Canton-S (WT)	Sc+Am (grown)-72 hours	Sc+Am (mixed after growing individually for 72 h)	L	11:15:00	6	25	40	13	0.457627	40	13	0.457627	0.331178
26	Canton-S (WT)	Sc+Am (grown)-72 hours	Sc+Am (mixed after growing individually for 72 h)	R	11:20:00	3	26	23	40	-0.257576	40	23	0.257576
27	Canton-S (WT)	Sc+Am (grown)-72 hours	Sc+Am (mixed after growing individually for 72 h)	L	11:25:00	6	27	46	10	0.580645	46	10	0.580645
28	Canton-S (WT)	Sc+Am (grown)-72 hours	Sc+Am (mixed after growing individually for 72 h)	R	11:30:00	5	28	24	35	-0.171875	35	24	0.171875
29	Canton-S (WT)	Sc+Am (grown)-72 hours	Sc+Am (mixed after growing individually for 72 h)	L	11:35:00	6	29	38	22	0.242424	38	22	0.242424
30	Canton-S (WT)	Sc+Am (grown)-72 hours	Sc+Am (mixed after growing individually for 72 h)	R	11:40:00	7	30	20	38	-0.276923	38	20	0.276923
31	Canton-S (WT)	Sc+Am (grown)-48 hours	AJM	L	12:15:00	7	31	29	15	0.27451	29	15	0.27451	0.313304
32	Canton-S (WT)	Sc+Am (grown)-48 hours	AJM	R	12:20:00	5	32	14	55	-0.554054	55	14	0.554054
33	Canton-S (WT)	Sc+Am (grown)-48 hours	AJM	L	12:25:00	9	33	40	16	0.369231	40	16	0.369231
34	Canton-S (WT)	Sc+Am (grown)-48 hours	AJM	R	12:30:00	3	34	24	35	-0.177419	35	24	0.177419
35	Canton-S (WT)	Sc+Am (grown)-48 hours	AJM	L	12:35:00	9	35	38	22	0.231884	38	22	0.231884
36	Canton-S (WT)	Sc+Am (grown)-48 hours	AJM	R	12:40:00	8	36	20	38	-0.272727	38	20	0.272727
37	Canton-S (WT)	Sc+Am (grown)-48 hours	Sc+Am (mixed after growing individually for 48 h)	L	12:45:00	5	37	45	17	0.41791	45	17	0.41791	0.143389
38	Canton-S (WT)	Sc+Am (grown)-48 hours	Sc+Am (mixed after growing individually for 48 h)	R	12:50:00	12	38	23	21	0.0357143	21	23	-0.0357143
39	Canton-S (WT)	Sc+Am (grown)-48 hours	Sc+Am (mixed after growing individually for 48 h)	L	12:55:00	8	39	28	21	0.122807	28	21	0.122807
40	Canton-S (WT)	Sc+Am (grown)-48 hours	Sc+Am (mixed after growing individually for 48 h)	R	13:00:00	9	40	16	24	-0.163265	24	16	0.163265
41	Canton-S (WT)	Sc+Am (grown)-48 hours	Sc+Am (mixed after growing individually for 48 h)	L	13:05:00	8	41	42	22	0.277778	42	22	0.277778
42	Canton-S (WT)	Sc+Am (grown)-48 hours	Sc+Am (mixed after growing individually for 48 h)	R	13:10:00	6	42	35	29	0.0857143	29	35	-0.0857143
43	Canton-S (WT)	ACV (25%)	Water	L	13:40:00	3	43	45	10	0.603448	45	10	0.603448	0.674732
44	Canton-S (WT)	ACV (25%)	Water	R	13:45:00	3	44	10	54	-0.656716	54	10	0.656716
45	Canton-S (WT)	ACV (25%)	Water	L	13:50:00	6	45	53	8	0.671642	53	8	0.671642
46	Canton-S (WT)	ACV (25%)	Water	R	13:55:00	3	46	7	63	-0.767123	63	7	0.767123
47	Canton-S (WT)	Benzaldehyde (-2)	Paraffin Oil	L	14:00:00	7	47	4	33	-0.659091	4	33	-0.659091	-0.696023
48	Canton-S (WT)	Benzaldehyde (-2)	Paraffin Oil	R	14:05:00	11	48	50	7	0.632353	7	50	-0.632353
49	Canton-S (WT)	Benzaldehyde (-2)	Paraffin Oil	L	14:10:00	7	49	2	42	-0.784314	2	42	-0.784314
50	Canton-S (WT)	Benzaldehyde (-2)	Paraffin Oil	R	14:15:00	7	50	58	7	0.708333	7	58	-0.708333
51	Canton-S (WT)	Sc+Am (grown)-66 hours	AJM	L	15:15:00	6	51	54	10	0.628571	54	10	0.628571	0.637102
52	Canton-S (WT)	Sc+Am (grown)-66 hours	AJM	R	15:20:00	1	52	4	49	-0.833333	49	4	0.833333
53	Canton-S (WT)	Sc+Am (grown)-66 hours	AJM	L	15:25:00	5	53	50	12	0.567164	50	12	0.567164
54	Canton-S (WT)	Sc+Am (grown)-66 hours	AJM	R	15:30:00	4	54	5	49	-0.758621	49	5	0.758621
55	Canton-S (WT)	Sc+Am (grown)-66 hours	AJM	L	15:35:00	5	55	53	11	0.608696	53	11	0.608696
56	Canton-S (WT)	Sc+Am (grown)-66 hours	AJM	R	15:40:00	9	56	13	39	-0.42623	39	13	0.42623
57	Canton-S (WT)	Sc+Am (grown)-66 hours	Sc+Am (mixed after growing individually for 66 h)	L	15:45:00	9	57	37	15	0.360656	37	15	0.360656	0.270289
58	Canton-S (WT)	Sc+Am (grown)-66 hours	Sc+Am (mixed after growing individually for 66 h)	R	15:50:00	5	58	23	33	-0.163934	33	23	0.163934
59	Canton-S (WT)	Sc+Am (grown)-66 hours	Sc+Am (mixed after growing individually for 66 h)	L	15:55:00	3	59	34	25	0.145161	34	25	0.145161
60	Canton-S (WT)	Sc+Am (grown)-66 hours	Sc+Am (mixed after growing individually for 66 h)	R	16:00:00	5	60	16	43	-0.421875	43	16	0.421875
61	Canton-S (WT)	Sc+Am (grown)-66 hours	Sc+Am (mixed after growing individually for 66 h)	L	16:05:00	2	61	42	27	0.211268	42	27	0.211268
62	Canton-S (WT)	Sc+Am (grown)-66 hours	Sc+Am (mixed after growing individually for 66 h)	R	16:10:00	9	62	19	41	-0.318841	41	19	0.318841
63	Canton-S (WT)	Sc+Am (grown)-80 hours	AJM	L	16:45:00	9	63	50	11	0.557143	50	11	0.557143	0.708959
64	Canton-S (WT)	Sc+Am (grown)-80 hours	AJM	R	16:50:00	4	64	6	57	-0.761194	57	6	0.761194
65	Canton-S (WT)	Sc+Am (grown)-80 hours	AJM	L	16:55:00	5	65	65	4	0.824324	65	4	0.824324
66	Canton-S (WT)	Sc+Am (grown)-80 hours	AJM	R	17:00:00	5	66	7	50	-0.693548	50	7	0.693548
67	Canton-S (WT)	Sc+Am (grown)-80 hours	AJM	L	17:05:00	4	67	50	6	0.733333	50	6	0.733333
68	Canton-S (WT)	Sc+Am (grown)-80 hours	AJM	R	17:10:00	4	68	7	46	-0.684211	46	7	0.684211
69	Canton-S (WT)	Sc+Am (grown)-80 hours	Sc+Am (mixed after growing individually for 80 h)	L	17:15:00	9	69	36	18	0.285714	36	18	0.285714	0.436525
70	Canton-S (WT)	Sc+Am (grown)-80 hours	Sc+Am (mixed after growing individually for 80 h)	R	17:20:00	6	70	13	47	-0.515152	47	13	0.515152
71	Canton-S (WT)	Sc+Am (grown)-80 hours	Sc+Am (mixed after growing individually for 80 h)	L	17:25:00	7	71	41	21	0.289855	41	21	0.289855
72	Canton-S (WT)	Sc+Am (grown)-80 hours	Sc+Am (mixed after growing individually for 80 h)	R	17:30:00	3	72	10	47	-0.616667	47	10	0.616667
73	Canton-S (WT)	Sc+Am (grown)-80 hours	Sc+Am (mixed after growing individually for 80 h)	L	17:35:00	6	73	44	18	0.382353	44	18	0.382353
74	Canton-S (WT)	Sc+Am (grown)-80 hours	Sc+Am (mixed after growing individually for 80 h)	R	17:40:00	2	74	11	38	-0.529412	38	11	0.529412
75	Canton-S (WT)	Sc+Am (grown)-54 hours	AJM	L	18:15:00	7	75	40	8	0.581818	40	8	0.581818	0.521403
76	Canton-S (WT)	Sc+Am (grown)-54 hours	AJM	R	18:20:00	7	76	12	42	-0.491803	42	12	0.491803
77	Canton-S (WT)	Sc+Am (grown)-54 hours	AJM	L	18:25:00	4	77	43	19	0.363636	43	19	0.363636
78	Canton-S (WT)	Sc+Am (grown)-54 hours	AJM	R	18:30:00	5	78	15	65	-0.588235	65	15	0.588235
79	Canton-S (WT)	Sc+Am (grown)-54 hours	AJM	L	18:35:00	5	79	49	15	0.492754	49	15	0.492754
80	Canton-S (WT)	Sc+Am (grown)-54 hours	AJM	R	18:40:00	5	80	9	45	-0.610169	45	9	0.610169
81	Canton-S (WT)	Sc+Am (grown)-54 hours	Sc+Am (mixed after growing individually for 54 h)	L	18:45:00	7	81	34	23	0.171875	34	23	0.171875	0.104876
82	Canton-S (WT)	Sc+Am (grown)-54 hours	Sc+Am (mixed after growing individually for 54 h)	R	18:50:00	11	82	17	34	-0.274194	34	17	0.274194
83	Canton-S (WT)	Sc+Am (grown)-54 hours	Sc+Am (mixed after growing individually for 54 h)	L	18:55:00	6	83	22	21	0.0204082	22	21	0.0204082
84	Canton-S (WT)	Sc+Am (grown)-54 hours	Sc+Am (mixed after growing individually for 54 h)	R	19:00:00	10	84	35	36	-0.0123457	36	35	0.0123457
85	Canton-S (WT)	Sc+Am (grown)-54 hours	Sc+Am (mixed after growing individually for 54 h)	L	19:05:00	9	85	24	18	0.117647	24	18	0.117647
86	Canton-S (WT)	Sc+Am (grown)-54 hours	Sc+Am (mixed after growing individually for 54 h)	R	19:10:00	11	86	24	26	-0.0327869	26	24	0.0327869

## Sheet: Exp2
Experiment #	Fly Strain	Test Arm	Control Arm	Test Side	Time_Experiment	Center Flies	Experiment #	Left Arm	Right Arm	Left Side RI	Test Arm	Control Arm	Test Arm RI
1	Canton-S (WT)	Mock (empty tube)	Mock (empty tube)	L	08:05:00	8	1	30	25	0.0793651	30	25	0.0793651	0.0753199
2	Canton-S (WT)	Mock (empty tube)	Mock (empty tube)	R	08:10:00	6	2	28	31	-0.0461538	31	28	0.0461538	-0.0154547
3	Canton-S (WT)	Mock (empty tube)	Mock (empty tube)	L	08:15:00	10	3	24	22	0.0357143	24	22	0.0357143
4	Canton-S (WT)	Mock (empty tube)	Mock (empty tube)	R	08:20:00	5	4	33	20	0.224138	20	33	-0.224138
5	Canton-S (WT)	Mock (empty tube)	Mock (empty tube)	L	08:25:00	6	5	30	26	0.0645161	30	26	0.0645161
6	Canton-S (WT)	Mock (empty tube)	Mock (empty tube)	R	08:30:00	6	6	26	21	0.0943396	21	26	-0.0943396
7	Canton-S (WT)	Sc+Am (grown)-34 hours	AJM	L	09:00:00	6	7	24	21	0.0588235	24	21	0.0588235	0.123824
8	Canton-S (WT)	Sc+Am (grown)-34 hours	AJM	R	09:05:00	3	8	22	38	-0.253968	38	22	0.253968
9	Canton-S (WT)	Sc+Am (grown)-34 hours	AJM	L	09:10:00	5	9	37	25	0.179104	37	25	0.179104
10	Canton-S (WT)	Sc+Am (grown)-34 hours	AJM	R	09:15:00	1	10	17	29	-0.255319	29	17	0.255319
11	Canton-S (WT)	Sc+Am (grown)-34 hours	AJM	L	09:20:00	5	11	33	30	0.0441176	33	30	0.0441176
12	Canton-S (WT)	Sc+Am (grown)-34 hours	AJM	R	09:25:00	7	12	29	26	0.0483871	26	29	-0.0483871
														0.127861
1	Canton-S (WT)	Sc+Am (grown)-34 hours	Sc+Am (mixed after growing individually for 34 h)	R	00:05:00	5	1	18	43	-0.378788	43	18	0.378788
2	Canton-S (WT)	Sc+Am (grown)-34 hours	Sc+Am (mixed after growing individually for 34 h)	L	00:10:00	3	2	30	34	-0.0597015	30	34	-0.0597015
3	Canton-S (WT)	Sc+Am (grown)-34 hours	Sc+Am (mixed after growing individually for 34 h)	R	00:15:00	3	3	20	31	-0.203704	31	20	0.203704
4	Canton-S (WT)	Sc+Am (grown)-34 hours	Sc+Am (mixed after growing individually for 34 h)	L	00:20:00	6	4	21	20	0.0212766	21	20	0.0212766
5	Canton-S (WT)	Sc+Am (grown)-34 hours	Sc+Am (mixed after growing individually for 34 h)	R	00:25:00	3	5	27	33	-0.0952381	33	27	0.0952381
6	Canton-S (WT)	Sc+Am (grown)-96 hours	AJM	L	10:30:00	4	6	47	4	0.781818	47	4	0.781818	0.751278
7	Canton-S (WT)	Sc+Am (grown)-96 hours	AJM	R	10:35:00	1	7	4	51	-0.839286	51	4	0.839286
8	Canton-S (WT)	Sc+Am (grown)-96 hours	AJM	L	10:40:00	4	8	49	8	0.672131	49	8	0.672131
9	Canton-S (WT)	Sc+Am (grown)-96 hours	AJM	R	10:45:00	1	9	4	53	-0.844828	53	4	0.844828
10	Canton-S (WT)	Sc+Am (grown)-96 hours	AJM	L	10:50:00	2	10	42	7	0.686275	42	7	0.686275
11	Canton-S (WT)	Sc+Am (grown)-96 hours	AJM	R	10:55:00	3	11	8	49	-0.683333	49	8	0.683333
12	Canton-S (WT)	Sc+Am (grown)-96 hours	Sc+Am (mixed after growing individually for 96 h)	L	11:00:00	4	12	35	17	0.321429	35	17	0.321429	0.542888
13	Canton-S (WT)	Sc+Am (grown)-96 hours	Sc+Am (mixed after growing individually for 96 h)	R	11:05:00	2	13	8	47	-0.684211	47	8	0.684211
14	Canton-S (WT)	Sc+Am (grown)-96 hours	Sc+Am (mixed after growing individually for 96 h)	L	11:10:00	2	14	42	22	0.30303	42	22	0.30303
15	Canton-S (WT)	Sc+Am (grown)-96 hours	Sc+Am (mixed after growing individually for 96 h)	R	11:15:00	3	15	8	38	-0.612245	38	8	0.612245
16	Canton-S (WT)	Sc+Am (grown)-96 hours	Sc+Am (mixed after growing individually for 96 h)	L	11:20:00	3	16	50	10	0.634921	50	10	0.634921
17	Canton-S (WT)	Sc+Am (grown)-96 hours	Sc+Am (mixed after growing individually for 96 h)	R	11:25:00	4	17	8	55	-0.701493	55	8	0.701493
18	Canton-S (WT)	Sc+Am (grown)-127 hours	AJM	L	16:00:00	6	18	43	12	0.508197	43	12	0.508197	0.657023
19	Canton-S (WT)	Sc+Am (grown)-127 hours	AJM	R	16:05:00	4	19	5	47	-0.75	47	5	0.75
20	Canton-S (WT)	Sc+Am (grown)-127 hours	AJM	L	16:10:00	3	20	37	8	0.604167	37	8	0.604167
21	Canton-S (WT)	Sc+Am (grown)-127 hours	AJM	R	16:15:00	6	21	9	46	-0.606557	46	9	0.606557
22	Canton-S (WT)	Sc+Am (grown)-127 hours	AJM	L	16:20:00	3	22	42	3	0.8125	42	3	0.8125
23	Canton-S (WT)	Sc+Am (grown)-127 hours	AJM	R	16:25:00	3	23	8	45	-0.660714	45	8	0.660714
24	Canton-S (WT)	Sc+Am (grown)-127 hours	Sc+Am (mixed after growing individually for 127 h)	L	16:30:00	6	24	38	9	0.54717	38	9	0.54717	0.329649
25	Canton-S (WT)	Sc+Am (grown)-127 hours	Sc+Am (mixed after growing individually for 127 h)	R	16:35:00	5	25	21	25	-0.0784314	25	21	0.0784314
26	Canton-S (WT)	Sc+Am (grown)-127 hours	Sc+Am (mixed after growing individually for 127 h)	L	16:40:00	7	26	45	9	0.590164	45	9	0.590164
27	Canton-S (WT)	Sc+Am (grown)-127 hours	Sc+Am (mixed after growing individually for 127 h)	R	16:45:00	7	27	17	29	-0.226415	29	17	0.226415
28	Canton-S (WT)	Sc+Am (grown)-127 hours	Sc+Am (mixed after growing individually for 127 h)	L	16:50:00	4	28	34	18	0.285714	34	18	0.285714
29	Canton-S (WT)	Sc+Am (grown)-127 hours	Sc+Am (mixed after growing individually for 127 h)	R	16:55:00	5	29	17	30	-0.25	30	17	0.25

## Sheet: Exp3
Experiment #	Fly Strain	Test Arm	Control Arm	Test Side	Time_Experiment	Center Flies	Experiment #	Left Arm	Right Arm	Left Side RI	Test Arm	Control Arm	Test Arm RI
1	Canton-S (WT)	Mock (empty tube)	Mock (empty tube)	L	07:15:00	6	1	26	30	-0.0645161	26	30	-0.0645161	0.0274271
2	Canton-S (WT)	Mock (empty tube)	Mock (empty tube)	R	07:20:00	8	2	31	23	0.129032	23	31	-0.129032	0.0202586
3	Canton-S (WT)	Mock (empty tube)	Mock (empty tube)	L	07:25:00	3	3	30	28	0.0327869	30	28	0.0327869
4	Canton-S (WT)	Mock (empty tube)	Mock (empty tube)	R	07:30:00		4				0	0	#DIV/0!
5	Canton-S (WT)	Mock (empty tube)	Mock (empty tube)	L	07:35:00	3	5	29	21	0.150943	29	21	0.150943
6	Canton-S (WT)	Mock (empty tube)	Mock (empty tube)	R	07:40:00	6	6	17	22	-0.111111	22	17	0.111111
7	Canton-S (WT)	Sc+Am (grown)-48 hours	AJM	L	08:20:00	6	7	44	14	0.46875	44	14	0.46875	0.425982
8	Canton-S (WT)	Sc+Am (grown)-48 hours	AJM	R	08:25:00	5	8	20	56	-0.444444	56	20	0.444444
9	Canton-S (WT)	Sc+Am (grown)-48 hours	AJM	L	08:30:00	2	9	31	27	0.0666667	31	27	0.0666667
10	Canton-S (WT)	Sc+Am (grown)-48 hours	AJM	R	08:35:00	1	10	14	63	-0.628205	63	14	0.628205
11	Canton-S (WT)	Sc+Am (grown)-48 hours	AJM	L	08:40:00	2	11	42	15	0.457627	42	15	0.457627
12	Canton-S (WT)	Sc+Am (grown)-48 hours	AJM	R	08:45:00	0	12	13	38	-0.490196	38	13	0.490196
13	Canton-S (WT)	Sc+Am (grown)-48 hours	Sc+Am (mixed after growing individually for 48 h)	L	08:50:00	1	13	30	26	0.0701754	30	26	0.0701754	0.294537
14	Canton-S (WT)	Sc+Am (grown)-48 hours	Sc+Am (mixed after growing individually for 48 h)	R	08:55:00	2	14	24	20	0.0869565	20	24	-0.0869565
15	Canton-S (WT)	Sc+Am (grown)-48 hours	Sc+Am (mixed after growing individually for 48 h)	L	09:00:00	1	15	52	13	0.590909	52	13	0.590909
16	Canton-S (WT)	Sc+Am (grown)-48 hours	Sc+Am (mixed after growing individually for 48 h)	R	09:05:00	2	16	27	42	-0.211268	42	27	0.211268
17	Canton-S (WT)	Sc+Am (grown)-48 hours	Sc+Am (mixed after growing individually for 48 h)	L	09:10:00	6	17	48	20	0.378378	48	20	0.378378
18	Canton-S (WT)	Sc+Am (grown)-48 hours	Sc+Am (mixed after growing individually for 48 h)	R	09:15:00	3	18	10	45	-0.603448	45	10	0.603448
19	Canton-S (WT)	Sc+Am (grown)-66 hours	AJM	L	09:50:00	5	19	60	21	0.453488	60	21	0.453488	0.587732
20	Canton-S (WT)	Sc+Am (grown)-66 hours	AJM	R	09:55:00	3	20	7	34	-0.613636	34	7	0.613636
21	Canton-S (WT)	Sc+Am (grown)-66 hours	AJM	L	10:00:00	6	21	49	12	0.552239	49	12	0.552239
22	Canton-S (WT)	Sc+Am (grown)-66 hours	AJM	R	10:05:00	0	22	5	44	-0.795918	44	5	0.795918
23	Canton-S (WT)	Sc+Am (grown)-66 hours	AJM	L	10:10:00	1	23	45	17	0.444444	45	17	0.444444
24	Canton-S (WT)	Sc+Am (grown)-66 hours	AJM	R	10:15:00	2	24	9	49	-0.666667	49	9	0.666667
25	Canton-S (WT)	Sc+Am (grown)-66 hours	Sc+Am (mixed after growing individually for 66 h)	L	10:20:00	3	25	39	25	0.208955	39	25	0.208955	0.38603
26	Canton-S (WT)	Sc+Am (grown)-66 hours	Sc+Am (mixed after growing individually for 66 h)	R	10:25:00	5	26	24	33	-0.145161	33	24	0.145161
27	Canton-S (WT)	Sc+Am (grown)-66 hours	Sc+Am (mixed after growing individually for 66 h)	L	10:30:00	6	27	48	8	0.645161	48	8	0.645161
28	Canton-S (WT)	Sc+Am (grown)-66 hours	Sc+Am (mixed after growing individually for 66 h)	R	10:35:00	3	28	11	42	-0.553571	42	11	0.553571
29	Canton-S (WT)	Sc+Am (grown)-66 hours	Sc+Am (mixed after growing individually for 66 h)	L	10:40:00	5	29	42	13	0.483333	42	13	0.483333
30	Canton-S (WT)	Sc+Am (grown)-66 hours	Sc+Am (mixed after growing individually for 66 h)	R	10:45:00	4	30	16	30	-0.28	30	16	0.28
31	Canton-S (WT)	Sc+Am (grown)-60 hours	AJM	L	11:20:00	6	31	49	9	0.625	49	9	0.625	0.635254
32	Canton-S (WT)	Sc+Am (grown)-60 hours	AJM	R	11:25:00	2	32	9	57	-0.705882	57	9	0.705882
33	Canton-S (WT)	Sc+Am (grown)-60 hours	AJM	L	11:30:00	2	33	46	10	0.62069	46	10	0.62069
34	Canton-S (WT)	Sc+Am (grown)-60 hours	AJM	R	11:35:00	4	34	6	53	-0.746032	53	6	0.746032
35	Canton-S (WT)	Sc+Am (grown)-60 hours	AJM	L	11:40:00	2	35	40	15	0.438596	40	15	0.438596
36	Canton-S (WT)	Sc+Am (grown)-60 hours	AJM	R	11:45:00	3	36	11	63	-0.675325	63	11	0.675325
37	Canton-S (WT)	Sc+Am (grown)-60 hours	Sc+Am (mixed after growing individually for 60 h)	L	11:50:00	3	37	54	14	0.56338	54	14	0.56338	0.481194
38	Canton-S (WT)	Sc+Am (grown)-60 hours	Sc+Am (mixed after growing individually for 60 h)	R	11:55:00	1	38	13	49	-0.571429	49	13	0.571429
39	Canton-S (WT)	Sc+Am (grown)-60 hours	Sc+Am (mixed after growing individually for 60 h)	L	12:00:00	6	39	32	14	0.346154	32	14	0.346154
40	Canton-S (WT)	Sc+Am (grown)-60 hours	Sc+Am (mixed after growing individually for 60 h)	R	12:05:00	2	40	18	32	-0.269231	32	18	0.269231
41	Canton-S (WT)	Sc+Am (grown)-60 hours	Sc+Am (mixed after growing individually for 60 h)	L	12:10:00	3	41	46	14	0.507937	46	14	0.507937
42	Canton-S (WT)	Sc+Am (grown)-60 hours	Sc+Am (mixed after growing individually for 60 h)	R	12:15:00	5	42	9	48	-0.629032	48	9	0.629032
43	Canton-S (WT)	Sc+Am (grown)-72 hours	AJM	L	12:50:00	3	43	46	8	0.666667	46	8	0.666667	0.673393
44	Canton-S (WT)	Sc+Am (grown)-72 hours	AJM	R	12:55:00	4	44	5	62	-0.802817	62	5	0.802817
45	Canton-S (WT)	Sc+Am (grown)-72 hours	AJM	L	13:00:00	1	45	62	4	0.865672	62	4	0.865672
46	Canton-S (WT)	Sc+Am (grown)-72 hours	AJM	R	13:05:00	1	46	10	50	-0.655738	50	10	0.655738
47	Canton-S (WT)	Sc+Am (grown)-72 hours	AJM	L	13:10:00	2	47	46	14	0.516129	46	14	0.516129
48	Canton-S (WT)	Sc+Am (grown)-72 hours	AJM	R	13:15:00	4	48	12	44	-0.533333	44	12	0.533333
49	Canton-S (WT)	Sc+Am (grown)-72 hours	Sc+Am (mixed after growing individually for 72 h)	L	13:20:00	6	49	47	21	0.351351	47	21	0.351351	0.330893
50	Canton-S (WT)	Sc+Am (grown)-72 hours	Sc+Am (mixed after growing individually for 72 h)	R	13:25:00	3	50	15	51	-0.521739	51	15	0.521739
51	Canton-S (WT)	Sc+Am (grown)-72 hours	Sc+Am (mixed after growing individually for 72 h)	L	13:30:00	8	51	35	21	0.21875	35	21	0.21875
52	Canton-S (WT)	Sc+Am (grown)-72 hours	Sc+Am (mixed after growing individually for 72 h)	R	13:35:00	2	52	12	40	-0.518519	40	12	0.518519
53	Canton-S (WT)	Sc+Am (grown)-72 hours	Sc+Am (mixed after growing individually for 72 h)	L	13:40:00	6	53	29	29	0	29	29	0
54	Canton-S (WT)	Sc+Am (grown)-72 hours	Sc+Am (mixed after growing individually for 72 h)	R	13:45:00	5	54	15	36	-0.375	36	15	0.375
55	Canton-S (WT)	Sc+Am (grown)-54 hours	AJM	L	14:20:00	5	55	52	5	0.758065	52	5	0.758065	0.675352
56	Canton-S (WT)	Sc+Am (grown)-54 hours	AJM	R	14:25:00	2	56	7	46	-0.709091	46	7	0.709091
57	Canton-S (WT)	Sc+Am (grown)-54 hours	AJM	L	14:30:00	2	57	44	7	0.698113	44	7	0.698113
58	Canton-S (WT)	Sc+Am (grown)-54 hours	AJM	R	14:35:00	4	58	13	48	-0.538462	48	13	0.538462
59	Canton-S (WT)	Sc+Am (grown)-54 hours	AJM	L	14:40:00	4	59	58	11	0.643836	58	11	0.643836
60	Canton-S (WT)	Sc+Am (grown)-54 hours	AJM	R	14:45:00	1	60	6	37	-0.704545	37	6	0.704545
61	Canton-S (WT)	Sc+Am (grown)-54 hours	Sc+Am (mixed after growing individually for 54 h)	L	14:50:00	3	61	25	17	0.177778	25	17	0.177778	0.360885
62	Canton-S (WT)	Sc+Am (grown)-54 hours	Sc+Am (mixed after growing individually for 54 h)	R	14:55:00	5	62	19	44	-0.367647	44	19	0.367647
63	Canton-S (WT)	Sc+Am (grown)-54 hours	Sc+Am (mixed after growing individually for 54 h)	L	15:00:00	7	63	41	24	0.236111	41	24	0.236111
64	Canton-S (WT)	Sc+Am (grown)-54 hours	Sc+Am (mixed after growing individually for 54 h)	R	15:05:00	5	64	13	49	-0.537313	49	13	0.537313
65	Canton-S (WT)	Sc+Am (grown)-54 hours	Sc+Am (mixed after growing individually for 54 h)	L	15:10:00	3	65	50	10	0.634921	50	10	0.634921
66	Canton-S (WT)	Sc+Am (grown)-54 hours	Sc+Am (mixed after growing individually for 54 h)	R	15:15:00	3	66	19	30	-0.211538	30	19	0.211538
67	Canton-S (WT)	ACV (25%)	Water	L	15:45:00	4	67	48	14	0.515152	48	14	0.515152	0.682529
68	Canton-S (WT)	ACV (25%)	Water	R	15:50:00	7	68	9	56	-0.652778	56	9	0.652778
69	Canton-S (WT)	ACV (25%)	Water	L	15:55:00	2	69	56	3	0.868852	56	3	0.868852
70	Canton-S (WT)	ACV (25%)	Water	R	16:00:00	3	70	10	62	-0.693333	62	10	0.693333
71	Canton-S (WT)	Benzaldehyde (-2)	Paraffin Oil	L	16:05:00	10	71	3	36	-0.673469	3	36	-0.673469	-0.592727
72	Canton-S (WT)	Benzaldehyde (-2)	Paraffin Oil	R	16:10:00	11	72	34	16	0.295082	16	34	-0.295082
73	Canton-S (WT)	Benzaldehyde (-2)	Paraffin Oil	L	16:15:00	2	73	3	41	-0.826087	3	41	-0.826087
74	Canton-S (WT)	Benzaldehyde (-2)	Paraffin Oil	R	16:20:00	7	74	43	9	0.576271	9	43	-0.576271
75	Canton-S (WT)	Sc+Am (grown)-80 hours	AJM	L	17:20:00	0	75	50	10	0.666667	50	10	0.666667	0.671346
76	Canton-S (WT)	Sc+Am (grown)-80 hours	AJM	R	17:25:00	3	76	9	61	-0.712329	61	9	0.712329
77	Canton-S (WT)	Sc+Am (grown)-80 hours	AJM	L	17:30:00	5	77	46	7	0.672414	46	7	0.672414
78	Canton-S (WT)	Sc+Am (grown)-80 hours	AJM	R	17:35:00	3	78	7	40	-0.66	40	7	0.66
79	Canton-S (WT)	Sc+Am (grown)-80 hours	AJM	L	17:40:00	3	79	48	9	0.65	48	9	0.65
80	Canton-S (WT)	Sc+Am (grown)-80 hours	AJM	R	17:45:00	4	80	9	53	-0.666667	53	9	0.666667
81	Canton-S (WT)	Sc+Am (grown)-80 hours	Sc+Am (mixed after growing individually for 80 h)	L	17:50:00	8	81	43	24	0.253333	43	24	0.253333	0.303746
82	Canton-S (WT)	Sc+Am (grown)-80 hours	Sc+Am (mixed after growing individually for 80 h)	R	17:55:00	5	82	24	43	-0.263889	43	24	0.263889
83	Canton-S (WT)	Sc+Am (grown)-80 hours	Sc+Am (mixed after growing individually for 80 h)	L	18:00:00	6	83	30	15	0.294118	30	15	0.294118
84	Canton-S (WT)	Sc+Am (grown)-80 hours	Sc+Am (mixed after growing individually for 80 h)	R	18:05:00	5	84	14	39	-0.431034	39	14	0.431034
85	Canton-S (WT)	Sc+Am (grown)-80 hours	Sc+Am (mixed after growing individually for 80 h)	L	18:10:00	2	85	30	23	0.127273	30	23	0.127273
86	Canton-S (WT)	Sc+Am (grown)-80 hours	Sc+Am (mixed after growing individually for 80 h)	R	18:15:00	3	86	13	37	-0.45283	37	13	0.45283

## Sheet: Exp4
Experiment #	Fly Strain	Test Arm	Control Arm	Test Side	Time_Experiment	Center Flies	Experiment #	Left Arm	Right Arm	Left Side RI	Test Arm	Control Arm	Test Arm RI
1	Canton-S (WT)	Mock (empty tube)	Mock (empty tube)	L	07:30:00	7	1	40	32	0.101266	40	32	0.101266	0.0389405
2	Canton-S (WT)	Mock (empty tube)	Mock (empty tube)	R	07:35:00	10	2	19	21	-0.04	21	19	0.04	0.0656071
3	Canton-S (WT)	Mock (empty tube)	Mock (empty tube)	L	07:40:00	11	3	23	20	0.0555556	23	20	0.0555556
4	Canton-S (WT)	Mock (empty tube)	Mock (empty tube)	R	07:45:00		4			#DIV/0!	0	0	#DIV/0!
5	Canton-S (WT)	Mock (empty tube)	Mock (empty tube)	L	07:50:00		5			#DIV/0!	0	0	#DIV/0!
6	Canton-S (WT)	Mock (empty tube)	Mock (empty tube)	R	07:55:00		6			#DIV/0!	0	0	#DIV/0!
7	Canton-S (WT)	Sc+Am (grown)-34 hours	AJM	L	08:20:00	10	7	30	23	0.111111	30	23	0.111111	-0.0432426
8	Canton-S (WT)	Sc+Am (grown)-34 hours	AJM	R	08:25:00	7	8	29	20	0.160714	20	29	-0.160714
9	Canton-S (WT)	Sc+Am (grown)-34 hours	AJM	L	08:30:00	4	9	29	26	0.0508475	29	26	0.0508475
10	Canton-S (WT)	Sc+Am (grown)-34 hours	AJM	R	08:35:00	9	10	41	23	0.246575	23	41	-0.246575
11	Canton-S (WT)	Sc+Am (grown)-34 hours	AJM	L	08:40:00	2	11	24	34	-0.166667	24	34	-0.166667
12	Canton-S (WT)	Sc+Am (grown)-34 hours	AJM	R	08:45:00	10	12	20	29	-0.152542	29	20	0.152542
13	Canton-S (WT)	Sc+Am (grown)-34 hours	Sc+Am (mixed after growing individually for 34 h)	L	08:50:00	5	13	22	27	-0.0925926	22	27	-0.0925926	-0.206373
14	Canton-S (WT)	Sc+Am (grown)-34 hours	Sc+Am (mixed after growing individually for 34 h)	R	08:55:00	9	14	34	18	0.262295	18	34	-0.262295
15	Canton-S (WT)	Sc+Am (grown)-34 hours	Sc+Am (mixed after growing individually for 34 h)	L	09:00:00	7	15	16	30	-0.264151	16	30	-0.264151
16	Canton-S (WT)	Sc+Am (grown)-34 hours	Sc+Am (mixed after growing individually for 34 h)	R	09:05:00	8	16	32	31	0.0140845	31	32	-0.0140845
17	Canton-S (WT)	Sc+Am (grown)-34 hours	Sc+Am (mixed after growing individually for 34 h)	L	09:10:00	2	17	16	46	-0.46875	16	46	-0.46875
18	Canton-S (WT)	Sc+Am (grown)-34 hours	Sc+Am (mixed after growing individually for 34 h)	R	09:15:00	5	18	35	26	0.136364	26	35	-0.136364
19	Canton-S (WT)	Sc+Am (grown)-96 hours	AJM	L	11:50:00	5	19	45	4	0.759259	45	4	0.759259	0.720144
20	Canton-S (WT)	Sc+Am (grown)-96 hours	AJM	R	11:55:00	6	20	11	53	-0.6	53	11	0.6
21	Canton-S (WT)	Sc+Am (grown)-96 hours	AJM	L	12:00:00	7	21	56	10	0.630137	56	10	0.630137
22	Canton-S (WT)	Sc+Am (grown)-96 hours	AJM	R	12:05:00	4	22	5	57	-0.787879	57	5	0.787879
23	Canton-S (WT)	Sc+Am (grown)-96 hours	AJM	L	12:10:00	4	23	59	2	0.876923	59	2	0.876923
24	Canton-S (WT)	Sc+Am (grown)-96 hours	AJM	R	12:15:00	7	24	6	44	-0.666667	44	6	0.666667
25	Canton-S (WT)	Sc+Am (grown)-96 hours	Sc+Am (mixed after growing individually for 96 h)	L	12:20:00	9	25	43	9	0.557377	43	9	0.557377	0.496029
26	Canton-S (WT)	Sc+Am (grown)-96 hours	Sc+Am (mixed after growing individually for 96 h)	R	12:25:00	10	26	9	47	-0.575758	47	9	0.575758
27	Canton-S (WT)	Sc+Am (grown)-96 hours	Sc+Am (mixed after growing individually for 96 h)	L	12:30:00	10	27	40	14	0.40625	40	14	0.40625
28	Canton-S (WT)	Sc+Am (grown)-96 hours	Sc+Am (mixed after growing individually for 96 h)	R	12:35:00	4	28	16	33	-0.320755	33	16	0.320755
29	Canton-S (WT)	Sc+Am (grown)-96 hours	Sc+Am (mixed after growing individually for 96 h)	L	12:40:00	8	29	41	12	0.47541	41	12	0.47541
30	Canton-S (WT)	Sc+Am (grown)-96 hours	Sc+Am (mixed after growing individually for 96 h)	R	12:45:00	5	30	9	50	-0.640625	50	9	0.640625
31	Canton-S (WT)	Sc+Am (grown)-127 hours	AJM	L	16:00:00	4	31	52	10	0.636364	52	10	0.636364	0.568542
32	Canton-S (WT)	Sc+Am (grown)-127 hours	AJM	R	16:05:00	5	32	11	42	-0.534483	42	11	0.534483
33	Canton-S (WT)	Sc+Am (grown)-127 hours	AJM	L	16:10:00	1	33	42	11	0.574074	42	11	0.574074
34	Canton-S (WT)	Sc+Am (grown)-127 hours	AJM	R	16:15:00	4	34	9	53	-0.666667	53	9	0.666667
35	Canton-S (WT)	Sc+Am (grown)-127 hours	AJM	L	16:20:00	3	35	40	9	0.596154	40	9	0.596154
36	Canton-S (WT)	Sc+Am (grown)-127 hours	AJM	R	16:25:00	10	36	12	35	-0.403509	35	12	0.403509
37	Canton-S (WT)	Sc+Am (grown)-127 hours	Sc+Am (mixed after growing individually for 127 h)	L	16:30:00	2	37	46	11	0.59322	46	11	0.59322	0.352538
38	Canton-S (WT)	Sc+Am (grown)-127 hours	Sc+Am (mixed after growing individually for 127 h)	R	16:35:00	8	38	16	41	-0.384615	41	16	0.384615
39	Canton-S (WT)	Sc+Am (grown)-127 hours	Sc+Am (mixed after growing individually for 127 h)	L	16:40:00	8	39	32	19	0.220339	32	19	0.220339
40	Canton-S (WT)	Sc+Am (grown)-127 hours	Sc+Am (mixed after growing individually for 127 h)	R	16:45:00	11	40	15	35	-0.327869	35	15	0.327869
41	Canton-S (WT)	Sc+Am (grown)-127 hours	Sc+Am (mixed after growing individually for 127 h)	L	16:50:00	9	41	37	18	0.296875	37	18	0.296875
42	Canton-S (WT)	Sc+Am (grown)-127 hours	Sc+Am (mixed after growing individually for 127 h)	R	16:55:00	8	42	19	38	-0.292308	38	19	0.292308

## Sheet: Exp5
Experiment #	Fly Strain	Test Arm	Control Arm	Test Side	Time_Experiment	Center Flies	Experiment #	Left Arm	Right Arm	Left Side RI	Test Arm	Control Arm	Test Arm RI
1	Canton-S (WT)	Mock (empty tube)	Mock (empty tube)	L	07:00:00	17	1	32	31	0.0125	32	31	0.0125	0.0830385
2	Canton-S (WT)	Mock (empty tube)	Mock (empty tube)	R	07:05:00	12	2	42	29	0.156627	29	42	-0.156627	-0.0116121
3	Canton-S (WT)	Mock (empty tube)	Mock (empty tube)	L	07:10:00	12	3	41	37	0.0444444	41	37	0.0444444
4	Canton-S (WT)	Mock (empty tube)	Mock (empty tube)	R	07:15:00		4				0	0	#DIV/0!
5	Canton-S (WT)	Mock (empty tube)	Mock (empty tube)	L	07:20:00	13	5	35	26	0.121622	35	26	0.121622
6	Canton-S (WT)	Mock (empty tube)	Mock (empty tube)	R	07:25:00	15	6	33	27	0.08	27	33	-0.08
7	Canton-S (WT)	Sc+Am (grown)-48 hours	AJM	L	07:50:00	6	7	31	20	0.192982	31	20	0.192982	0.379409
8	Canton-S (WT)	Sc+Am (grown)-48 hours	AJM	R	07:55:00	5	8	7	47	-0.677966	47	7	0.677966
9	Canton-S (WT)	Sc+Am (grown)-48 hours	AJM	L	08:00:00	2	9	32	14	0.375	32	14	0.375
10	Canton-S (WT)	Sc+Am (grown)-48 hours	AJM	R	08:05:00	7	10	21	45	-0.328767	45	21	0.328767
11	Canton-S (WT)	Sc+Am (grown)-48 hours	AJM	L	08:10:00	8	11	43	12	0.492063	43	12	0.492063
12	Canton-S (WT)	Sc+Am (grown)-48 hours	AJM	R	08:15:00	7	12	21	34	-0.209677	34	21	0.209677
13	Canton-S (WT)	Sc+Am (grown)-48 hours	Sc+Am (mixed after growing individually for 48 h)	L	08:20:00	4	13	25	40	-0.217391	25	40	-0.217391	0.078946
14	Canton-S (WT)	Sc+Am (grown)-48 hours	Sc+Am (mixed after growing individually for 48 h)	R	08:25:00	8	14	27	35	-0.114286	35	27	0.114286
15	Canton-S (WT)	Sc+Am (grown)-48 hours	Sc+Am (mixed after growing individually for 48 h)	L	08:30:00	8	15	36	22	0.212121	36	22	0.212121
16	Canton-S (WT)	Sc+Am (grown)-48 hours	Sc+Am (mixed after growing individually for 48 h)	R	08:35:00		16			#DIV/0!	0	0	#DIV/0!
17	Canton-S (WT)	Sc+Am (grown)-48 hours	Sc+Am (mixed after growing individually for 48 h)	L	08:40:00	3	17	39	21	0.285714	39	21	0.285714
18	Canton-S (WT)	Sc+Am (grown)-48 hours	Sc+Am (mixed after growing individually for 48 h)	R	08:45:00	7	18	30	30	0	30	30	0
19	Canton-S (WT)	Sc+Am (grown)-60 hours	AJM	L	09:20:00	6	19	38	20	0.28125	38	20	0.28125	0.412043
20	Canton-S (WT)	Sc+Am (grown)-60 hours	AJM	R	09:25:00	6	20	28	49	-0.253012	49	28	0.253012
21	Canton-S (WT)	Sc+Am (grown)-60 hours	AJM	L	09:30:00	3	21	60	8	0.732394	60	8	0.732394
22	Canton-S (WT)	Sc+Am (grown)-60 hours	AJM	R	09:35:00	12	22	19	56	-0.425287	56	19	0.425287
23	Canton-S (WT)	Sc+Am (grown)-60 hours	AJM	L	09:40:00	10	23	34	14	0.344828	34	14	0.344828
24	Canton-S (WT)	Sc+Am (grown)-60 hours	AJM	R	09:45:00	7	24	14	41	-0.435484	41	14	0.435484
25	Canton-S (WT)	Sc+Am (grown)-60 hours	Sc+Am (mixed after growing individually for 60 h)	L	09:50:00	14	25	30	25	0.0724638	30	25	0.0724638	-0.0398734
26	Canton-S (WT)	Sc+Am (grown)-60 hours	Sc+Am (mixed after growing individually for 60 h)	R	09:55:00	8	26	27	36	-0.126761	36	27	0.126761
27	Canton-S (WT)	Sc+Am (grown)-60 hours	Sc+Am (mixed after growing individually for 60 h)	L	10:00:00	2	27	33	42	-0.116883	33	42	-0.116883
28	Canton-S (WT)	Sc+Am (grown)-60 hours	Sc+Am (mixed after growing individually for 60 h)	R	10:05:00	9	28	41	21	0.28169	21	41	-0.28169
29	Canton-S (WT)	Sc+Am (grown)-60 hours	Sc+Am (mixed after growing individually for 60 h)	L	10:10:00	4	29	27	32	-0.0793651	27	32	-0.0793651
30	Canton-S (WT)	Sc+Am (grown)-60 hours	Sc+Am (mixed after growing individually for 60 h)	R	10:15:00	13	30	30	33	-0.0394737	33	30	0.0394737
31	Canton-S (WT)	Sc+Am (grown)-72 hours	AJM	L	10:50:00	11	31	53	13	0.519481	53	13	0.519481	0.530136
32	Canton-S (WT)	Sc+Am (grown)-72 hours	AJM	R	10:55:00	3	32	18	68	-0.561798	68	18	0.561798
33	Canton-S (WT)	Sc+Am (grown)-72 hours	AJM	L	11:00:00	6	33	53	15	0.513514	53	15	0.513514
34	Canton-S (WT)	Sc+Am (grown)-72 hours	AJM	R	11:05:00	8	34	18	54	-0.45	54	18	0.45
35	Canton-S (WT)	Sc+Am (grown)-72 hours	AJM	L	11:10:00	7	35	78	15	0.63	78	15	0.63
36	Canton-S (WT)	Sc+Am (grown)-72 hours	AJM	R	11:15:00	5	36	18	60	-0.506024	60	18	0.506024
37	Canton-S (WT)	Sc+Am (grown)-72 hours	Sc+Am (mixed after growing individually for 72 h)	L	11:20:00	8	37	43	22	0.287671	43	22	0.287671	0.294507
38	Canton-S (WT)	Sc+Am (grown)-72 hours	Sc+Am (mixed after growing individually for 72 h)	R	11:25:00	6	38	24	38	-0.205882	38	24	0.205882
39	Canton-S (WT)	Sc+Am (grown)-72 hours	Sc+Am (mixed after growing individually for 72 h)	L	11:30:00		39			#DIV/0!	0	0	#DIV/0!
40	Canton-S (WT)	Sc+Am (grown)-72 hours	Sc+Am (mixed after growing individually for 72 h)	R	11:35:00	6	40	23	43	-0.277778	43	23	0.277778
41	Canton-S (WT)	Sc+Am (grown)-72 hours	Sc+Am (mixed after growing individually for 72 h)	L	11:40:00	9	41	42	23	0.256757	42	23	0.256757
42	Canton-S (WT)	Sc+Am (grown)-72 hours	Sc+Am (mixed after growing individually for 72 h)	R	11:45:00	7	42	14	42	-0.444444	42	14	0.444444
43	Canton-S (WT)	ACV (1/4)	Water	L	12:15:00	6	43	48	6	0.7	48	6	0.7	0.655572
44	Canton-S (WT)	ACV (1/4)	Water	R	12:20:00	8	44	7	58	-0.69863	58	7	0.69863
45	Canton-S (WT)	ACV (1/4)	Water	L	12:25:00	3	45	74	16	0.623656	74	16	0.623656
46	Canton-S (WT)	ACV (1/4)	Water	R	12:30:00	4	46	11	50	-0.6	50	11	0.6
47	Canton-S (WT)	Benzaldehyde (-2)	Paraffin Oil	L	12:35:00	14	47	11	45	-0.485714	11	45	-0.485714	-0.533006
48	Canton-S (WT)	Benzaldehyde (-2)	Paraffin Oil	R	12:40:00	8	48	56	4	0.764706	4	56	-0.764706
49	Canton-S (WT)	Benzaldehyde (-2)	Paraffin Oil	L	12:45:00	15	49	20	36	-0.225352	20	36	-0.225352
50	Canton-S (WT)	Benzaldehyde (-2)	Paraffin Oil	R	12:50:00	16	50	45	3	0.65625	3	45	-0.65625
51	Canton-S (WT)	Sc+Am (grown)-54 hours	AJM	L	13:20:00	5	51	51	12	0.573529	51	12	0.573529	0.544316
52	Canton-S (WT)	Sc+Am (grown)-54 hours	AJM	R	13:25:00	4	52	12	38	-0.481481	38	12	0.481481
53	Canton-S (WT)	Sc+Am (grown)-54 hours	AJM	L	13:30:00	5	53	48	13	0.530303	48	13	0.530303
54	Canton-S (WT)	Sc+Am (grown)-54 hours	AJM	R	13:35:00	7	54	9	50	-0.621212	50	9	0.621212
55	Canton-S (WT)	Sc+Am (grown)-54 hours	AJM	L	13:40:00	7	55	42	12	0.491803	42	12	0.491803
56	Canton-S (WT)	Sc+Am (grown)-54 hours	AJM	R	13:45:00	4	56	14	56	-0.567568	56	14	0.567568
57	Canton-S (WT)	Sc+Am (grown)-54 hours	Sc+Am (mixed after growing individually for 54 h)	L	13:50:00	7	57	25	26	-0.0172414	25	26	-0.0172414	0.0528641
58	Canton-S (WT)	Sc+Am (grown)-54 hours	Sc+Am (mixed after growing individually for 54 h)	R	13:55:00	9	58	13	29	-0.313725	29	13	0.313725
59	Canton-S (WT)	Sc+Am (grown)-54 hours	Sc+Am (mixed after growing individually for 54 h)	L	14:00:00	6	59	26	26	0	26	26	0
60	Canton-S (WT)	Sc+Am (grown)-54 hours	Sc+Am (mixed after growing individually for 54 h)	R	14:05:00	10	60	38	35	0.0361446	35	38	-0.0361446
61	Canton-S (WT)	Sc+Am (grown)-54 hours	Sc+Am (mixed after growing individually for 54 h)	L	14:10:00	2	61	35	28	0.107692	35	28	0.107692
62	Canton-S (WT)	Sc+Am (grown)-54 hours	Sc+Am (mixed after growing individually for 54 h)	R	14:15:00	8	62	27	24	0.0508475	24	27	-0.0508475
63	Canton-S (WT)	Sc+Am (grown)-66 hours	AJM	L	14:50:00	6	63	48	4	0.758621	48	4	0.758621	0.672886
64	Canton-S (WT)	Sc+Am (grown)-66 hours	AJM	R	14:55:00	3	64	9	53	-0.676923	53	9	0.676923
65	Canton-S (WT)	Sc+Am (grown)-66 hours	AJM	L	15:00:00	4	65	48	9	0.639344	48	9	0.639344
66	Canton-S (WT)	Sc+Am (grown)-66 hours	AJM	R	15:05:00	4	66	10	61	-0.68	61	10	0.68
67	Canton-S (WT)	Sc+Am (grown)-66 hours	AJM	L	15:10:00	3	67	53	12	0.602941	53	12	0.602941
68	Canton-S (WT)	Sc+Am (grown)-66 hours	AJM	R	15:15:00	5	68	10	63	-0.679487	63	10	0.679487
69	Canton-S (WT)	Sc+Am (grown)-66 hours	Sc+Am (mixed after growing individually for 66 h)	L	15:20:00	6	69	53	13	0.555556	53	13	0.555556	0.427808
70	Canton-S (WT)	Sc+Am (grown)-66 hours	Sc+Am (mixed after growing individually for 66 h)	R	15:25:00	8	70	11	41	-0.5	41	11	0.5
71	Canton-S (WT)	Sc+Am (grown)-66 hours	Sc+Am (mixed after growing individually for 66 h)	L	15:30:00	5	71	49	15	0.492754	49	15	0.492754
72	Canton-S (WT)	Sc+Am (grown)-66 hours	Sc+Am (mixed after growing individually for 66 h)	R	15:35:00	5	72	14	37	-0.410714	37	14	0.410714
73	Canton-S (WT)	Sc+Am (grown)-66 hours	Sc+Am (mixed after growing individually for 66 h)	L	15:40:00	6	73	38	14	0.413793	38	14	0.413793
74	Canton-S (WT)	Sc+Am (grown)-66 hours	Sc+Am (mixed after growing individually for 66 h)	R	15:45:00	10	74	22	35	-0.19403	35	22	0.19403
75	Canton-S (WT)	Sc+Am (grown)-80 hours	AJM	L	17:20:00	3	75	45	18	0.409091	45	18	0.409091	0.608996
76	Canton-S (WT)	Sc+Am (grown)-80 hours	AJM	R	17:25:00	1	76	8	56	-0.738462	56	8	0.738462
77	Canton-S (WT)	Sc+Am (grown)-80 hours	AJM	L	17:30:00	0	77	51	12	0.619048	51	12	0.619048
78	Canton-S (WT)	Sc+Am (grown)-80 hours	AJM	R	17:35:00	6	78	11	42	-0.525424	42	11	0.525424
79	Canton-S (WT)	Sc+Am (grown)-80 hours	AJM	L	17:40:00	3	79	52	11	0.621212	52	11	0.621212
80	Canton-S (WT)	Sc+Am (grown)-80 hours	AJM	R	17:45:00	2	80	6	46	-0.740741	46	6	0.740741
81	Canton-S (WT)	Sc+Am (grown)-80 hours	Sc+Am (mixed after growing individually for 80 h)	L	17:50:00	6	81	33	21	0.2	33	21	0.2	0.330968
82	Canton-S (WT)	Sc+Am (grown)-80 hours	Sc+Am (mixed after growing individually for 80 h)	R	17:55:00	2	82	10	56	-0.676471	56	10	0.676471
83	Canton-S (WT)	Sc+Am (grown)-80 hours	Sc+Am (mixed after growing individually for 80 h)	L	18:00:00	5	83	34	26	0.123077	34	26	0.123077
84	Canton-S (WT)	Sc+Am (grown)-80 hours	Sc+Am (mixed after growing individually for 80 h)	R	18:05:00		84			#DIV/0!	0	0	#DIV/0!
85	Canton-S (WT)	Sc+Am (grown)-80 hours	Sc+Am (mixed after growing individually for 80 h)	L	18:10:00	3	85	34	13	0.42	34	13	0.42
86	Canton-S (WT)	Sc+Am (grown)-80 hours	Sc+Am (mixed after growing individually for 80 h)	R	18:15:00	7	86	16	28	-0.235294	28	16	0.235294

## Sheet: Exp6
Experiment #	Fly Strain	Test Arm	Control Arm	Test Side	Time_Experiment	Center Flies	Experiment #	Left Arm	Right Arm	Left Side RI	Test Arm	Control Arm	Test Arm RI
1	Canton-S (WT)	Mock (empty tube)	Mock (empty tube)	L	07:30:00	13	1			0	0	0	0	0.0194207
2	Canton-S (WT)	Mock (empty tube)	Mock (empty tube)	R	07:35:00	7	2	35	40	-0.0609756	40	35	0.0609756	0.00305119
3	Canton-S (WT)	Mock (empty tube)	Mock (empty tube)	L	07:40:00	15	3	27	27	0	27	27	0
4	Canton-S (WT)	Mock (empty tube)	Mock (empty tube)	R	07:45:00	12	4	31	30	0.0136986	30	31	-0.0136986
5	Canton-S (WT)	Mock (empty tube)	Mock (empty tube)	L	07:50:00	15	5	40	34	0.0674157	40	34	0.0674157
6	Canton-S (WT)	Mock (empty tube)	Mock (empty tube)	R	07:55:00	13	6	39	31	0.0963855	31	39	-0.0963855
7	Canton-S (WT)	Sc+Am (grown)-96 hours	AJM	L	10:20:00	6	7	74	9	0.730337	74	9	0.730337	0.683378
8	Canton-S (WT)	Sc+Am (grown)-96 hours	AJM	R	10:25:00	6	8	12	56	-0.594595	56	12	0.594595
9	Canton-S (WT)	Sc+Am (grown)-96 hours	AJM	L	10:30:00	2	9	60	8	0.742857	60	8	0.742857
10	Canton-S (WT)	Sc+Am (grown)-96 hours	AJM	R	10:35:00	3	10	10	60	-0.684932	60	10	0.684932
11	Canton-S (WT)	Sc+Am (grown)-96 hours	AJM	L	10:40:00	7	11	57	13	0.571429	57	13	0.571429
12	Canton-S (WT)	Sc+Am (grown)-96 hours	AJM	R	10:45:00	3	12	6	58	-0.776119	58	6	0.776119
13	Canton-S (WT)	Sc+Am (grown)-96 hours	Sc+Am (mixed after growing individually for 96 h)	L	10:50:00	2	13	42	20	0.34375	42	20	0.34375	0.438035
14	Canton-S (WT)	Sc+Am (grown)-96 hours	Sc+Am (mixed after growing individually for 96 h)	R	10:55:00	7	14	13	55	-0.56	55	13	0.56
15	Canton-S (WT)	Sc+Am (grown)-96 hours	Sc+Am (mixed after growing individually for 96 h)	L	11:00:00	7	15	57	18	0.47561	57	18	0.47561
16	Canton-S (WT)	Sc+Am (grown)-96 hours	Sc+Am (mixed after growing individually for 96 h)	R	11:05:00	6	16	13	55	-0.567568	55	13	0.567568
17	Canton-S (WT)	Sc+Am (grown)-96 hours	Sc+Am (mixed after growing individually for 96 h)	L	11:10:00	7	17	72	27	0.424528	72	27	0.424528
18	Canton-S (WT)	Sc+Am (grown)-96 hours	Sc+Am (mixed after growing individually for 96 h)	R	11:15:00	5	18	25	44	-0.256757	44	25	0.256757
19	Canton-S (WT)	ACV (25%)	Water	L	03:00:00	7	19	67	8	0.719512	67	8	0.719512	0.603395
20	Canton-S (WT)	ACV (25%)	Water	R	03:05:00	4	20	14	69	-0.632184	69	14	0.632184
21	Canton-S (WT)	ACV (25%)	Water	L	03:10:00	3	21	58	18	0.506329	58	18	0.506329
22	Canton-S (WT)	ACV (25%)	Water	R	03:15:00	4	22	16	61	-0.555556	61	16	0.555556
23	Canton-S (WT)	Benzaldehyde (-2)	Paraffin Oil	L	03:20:00	6	23	7	47	-0.666667	7	47	-0.666667	-0.642023
24	Canton-S (WT)	Benzaldehyde (-2)	Paraffin Oil	R	03:25:00	11	24	61	17	0.494382	17	61	-0.494382
25	Canton-S (WT)	Benzaldehyde (-2)	Paraffin Oil	L	03:30:00	8	25	2	63	-0.835616	2	63	-0.835616
26	Canton-S (WT)	Benzaldehyde (-2)	Paraffin Oil	R	03:35:00	11	26	55	11	0.571429	11	55	-0.571429
27	Canton-S (WT)	Sc+Am (grown)-127 hours	AJM	L	16:20:00	5	27	64	13	0.621951	64	13	0.621951	0.712572
28	Canton-S (WT)	Sc+Am (grown)-127 hours	AJM	R	16:25:00	4	28	2	60	-0.878788	60	2	0.878788
29	Canton-S (WT)	Sc+Am (grown)-127 hours	AJM	L	16:30:00	3	29	58	9	0.7	58	9	0.7
30	Canton-S (WT)	Sc+Am (grown)-127 hours	AJM	R	16:35:00	4	30	13	74	-0.67033	74	13	0.67033
31	Canton-S (WT)	Sc+Am (grown)-127 hours	AJM	L	16:40:00	5	31	58	11	0.635135	58	11	0.635135
32	Canton-S (WT)	Sc+Am (grown)-127 hours	AJM	R	16:45:00	8	32	5	65	-0.769231	65	5	0.769231
33	Canton-S (WT)	Sc+Am (grown)-127 hours	Sc+Am (mixed after growing individually for 127 h)	L	16:50:00	5	33	56	23	0.392857	56	23	0.392857	0.433958
34	Canton-S (WT)	Sc+Am (grown)-127 hours	Sc+Am (mixed after growing individually for 127 h)	R	16:55:00	4	34	3	66	-0.863014	66	3	0.863014
35	Canton-S (WT)	Sc+Am (grown)-127 hours	Sc+Am (mixed after growing individually for 127 h)	L	17:00:00	11	35	68	26	0.4	68	26	0.4
36	Canton-S (WT)	Sc+Am (grown)-127 hours	Sc+Am (mixed after growing individually for 127 h)	R	17:05:00	4	36	27	43	-0.216216	43	27	0.216216
37	Canton-S (WT)	Sc+Am (grown)-127 hours	Sc+Am (mixed after growing individually for 127 h)	L	17:10:00	11	37	39	26	0.171053	39	26	0.171053
38	Canton-S (WT)	Sc+Am (grown)-127 hours	Sc+Am (mixed after growing individually for 127 h)	R	17:15:00	9	38	10	47	-0.560606	47	10	0.560606

## Sheet: Exp7
Experiment #	Fly Strain	Test Arm	Control Arm	Test Side	Time_Experiment	Center Flies	Experiment #	Left Arm	Right Arm	Left Side RI	Test Arm	Control Arm	Test Arm RI
1	Canton-S (WT)	Mock (empty tube)	Mock (empty tube)	L	07:30:00	13	1	20	26	-0.101695	20	26	-0.101695	-0.0533039
2	Canton-S (WT)	Mock (empty tube)	Mock (empty tube)	R	07:35:00	7	2	23	29	-0.101695	29	23	0.101695	0.0144928
3	Canton-S (WT)	Mock (empty tube)	Mock (empty tube)	L	07:40:00	10	3	43	39	0.0434783	43	39	0.0434783
4	Canton-S (WT)	Sc+Am (grown)-34 hours	AJM	L	08:20:00	4	4	64	25	0.419355	64	25	0.419355	0.347027
5	Canton-S (WT)	Sc+Am (grown)-34 hours	AJM	R	08:25:00	1	5	13	66	-0.6625	66	13	0.6625
6	Canton-S (WT)	Sc+Am (grown)-34 hours	AJM	L	08:30:00	5	6	61	40	0.198113	61	40	0.198113
7	Canton-S (WT)	Sc+Am (grown)-34 hours	AJM	R	08:35:00	8	7	30	43	-0.160494	43	30	0.160494
8	Canton-S (WT)	Sc+Am (grown)-34 hours	AJM	L	08:40:00	3	8	57	13	0.60274	57	13	0.60274
9	Canton-S (WT)	Sc+Am (grown)-34 hours	AJM	R	08:45:00	4	9	35	38	-0.038961	38	35	0.038961
10	Canton-S (WT)	Sc+Am (grown)-34 hours	Sc+Am (mixed after growing individually for 34 h)	L	08:50:00	5	10	54	19	0.448718	54	19	0.448718	0.159719
11	Canton-S (WT)	Sc+Am (grown)-34 hours	Sc+Am (mixed after growing individually for 34 h)	R	08:55:00	6	11	18	54	-0.461538	54	18	0.461538
12	Canton-S (WT)	Sc+Am (grown)-34 hours	Sc+Am (mixed after growing individually for 34 h)	L	09:00:00	5	12	42	30	0.155844	42	30	0.155844
13	Canton-S (WT)	Sc+Am (grown)-34 hours	Sc+Am (mixed after growing individually for 34 h)	R	09:05:00	8	13	33	26	0.104478	26	33	-0.104478
14	Canton-S (WT)	Sc+Am (grown)-34 hours	Sc+Am (mixed after growing individually for 34 h)	L	09:10:00	6	14	24	34	-0.15625	24	34	-0.15625
15	Canton-S (WT)	Sc+Am (grown)-34 hours	Sc+Am (mixed after growing individually for 34 h)	R	09:15:00	10	15	31	44	-0.152941	44	31	0.152941
