# Supplementary material for: Metabolite exchange between microbiome members produces compounds that influence Drosophila behavior
Source: eLife. 2017 Jan 9;6:e18855. doi: 10.7554/eLife.18855 (PMC5222558; doi:10.7554/eLife.18855)
Supplement: Figure 2—source data 2. — DOI: http://dx.doi.org/10.7554/eLife.18855.011 [file elife-18855-fig2-data2.xlsx]

## Sheet: pH_Counts_byGroup
Identifier	Organism	Time	Colonies	Dilution	Total	pH	Behavioral Index (AJM)	Behavioral Index (mixed)	Misc	Date	Average of inoculum per experimental replicate: 3 total
Sc_inoculum_1	Sc	0	193	1	3860				for 80 h	T 1_20_15	3730
Am_inoculum_1	Am	0	864	1	17280				for 80 h	T 1_20_15	21546.7
Sc_inoculum_2	Sc	0	142	1	2840				for 72 h	T 1_20_15
Am_inoculum_2	Am	0	960	1	19200				for 72 h	T 1_20_15	2351.43
Sc_inoculum_3	Sc	0	143	1	2860				for 48, 54 h	T 1_20_15	24960
Am_inoculum_3	Am	0	992	1	19840				for 48, 54 h	T 1_20_15
Sc_inoculum_4	Sc	0	117	1	2340				for 60, 66 h	T 1_20_15	1968.57
Am_inoculum_4	Am	0	928	1	18560				for 60, 66 h	T 1_20_15	20914.3
Sc_inoculum_5	Sc	0	228	1	4560				for 127 h	M_1_26_15
Am_inoculum_5	Am	0	1440	1	28800				for 127 h	M_1_26_15
Sc_inoculum_6	Sc	0	296	1	5920				for 96 h	M_1_26_15
Am_inoculum_6	Am	0	1280	1	25600				for 96 h	M_1_26_15
Sc_inoculum_7	Sc	0	112	1	2240				for 80 h	T_1_27_15
Am_inoculum_7	Am	0	1600	1	32000				for 80 h	T_1_27_15
Sc_inoculum_8	Sc	0	105	1	2100				for 72 h	T_1_27_15
Am_inoculum_8	Am	0	704	1	14080				for 72 h	T_1_27_15
Sc_inoculum_9	Sc	0	84	1	1680				for 66 h	T_1_27_15
Am_inoculum_9	Am	0	816	1	16320				for 66 h	T_1_27_15
Sc_inoculum_10	Sc	0	116	1	2320				for 34 h, 60 h	M_1_26_15, T_1_27_15
Am_inoculum_10	Am	0	1256	1	25120				for 34 h, 60 h	M_1_26_15, T_1_27_15
Sc_inoculum_11	Sc	0	167	1	3340				for 48, 54 h	T_1_27_15
Am_inoculum_11	Am	0	1760	1	35200				for 48, 54 h	T_1_27_15
Sc_inoculum_12	Sc	0	108	1	2160				for 127 h	M_2_2_15
Am_inoculum_12	Am	0	1400	1	28000				for 127 h	M_2_2_15
Sc_inoculum_13	Sc	0	131	1	2620				for 96 h	M_2_2_15
Am_inoculum_13	Am	0	1200	1	24000				for 96 h	M_2_2_15
Sc_inoculum_14	Sc	0	121	1	2420				for 80 h	T_2_3_15
Am_inoculum_14	Am	0	1000	1	20000				for 80 h	T_2_3_15
Sc_inoculum_15	Sc	0	152	1	3040				for 72 h	T_2_3_15
Am_inoculum_15	Am	0	752	1	15040				for 72 h	T_2_3_15
Sc_inoculum_16	Sc	0	59	1	1180				for 60, 66, 34 h	T_2_3_15, M_2_2_15
Am_inoculum_16	Am	0	864	1	17280				for 60, 66, 34 h	T_2_3_15, M_2_2_15
Sc_inoculum_17	Sc	0	80	1	1600				for 48, 54 h	T_2_3_15
Am_inoculum_17	Am	0	600	1	12000				for 48, 54 h	T_2_3_15
Sc_inoculum_18	Sc	0	82	1	1640				for 127 h	M_2_9_15
Am_inoculum_18	Am	0	1224	1	24480				for 127 h	M_2_9_15
Sc_inoculum_19	Sc	0	145	1	2900				for 96 h	M_2_9_15
Am_inoculum_19	Am	0	1624	1	32480				for 96 h	M_2_9_15
Sc_inoculum_20	Sc	0	50	1	1000				for 34 h	W_2_11_15
Am_inoculum_20	Am	0	1256	1	25120				for 34 h	W_2_11_15
AJM_1	NA	34	0	1	0	5.28				M_1_26_15
AJM_2	NA	34	0	1	0	5.3				M_2_2_15
AJM_3	NA	34	0	1	0	5.32				M_2_9_15
Sc_1	Sc	34	54	100000	108000000	4.65				M_1_26_15
Sc_2	Sc	34	198	10000	39600000	4.62				M_2_2_15
Sc_3	Sc	34	28	10000	5600000	5.26				M_2_9_15
Am_1	Am	34	43	100000	86000000	4.21				M_1_26_15
Am_2	Am	34	1264	100	2528000	4.99				M_2_2_15
Am_3	Am	34	31	10000	6200000	5.17				M_2_9_15
ScAm_1	Sc	34	50	100000	100000000	4.14	0.123824	0.127861		M_1_26_15
ScAm_1	Am	34	38	100000	76000000					M_1_26_15
ScAm_2	Sc	34	30	100000	60000000	4.61	-0.0432426	-0.206373		M_2_2_15
ScAm_2	Am	34	23	10000	4600000					M_2_2_15
ScAm_3	Sc	34	179	10000	35800000	4.79	0.347027	0.159719		M_2_9_15
ScAm_3	Am	34	87	10000	17400000					M_2_9_15
AJM_1	NA	48	0	1	0	5.3				T 1_20_15
AJM_2	NA	48	0	1	0	5.15				T_1_27_15
AJM_3	NA	48	0	1	0	5.26				T_2_3_15
Sc_1	Sc	48	32	100000	64000000	4.71				T 1_20_15
Sc_2	Sc	48	75	100000	150000000	4.61				T_1_27_15
Sc_3	Sc	48			0	4.75				T_2_3_15
Am_1	Am	48	96	100000	192000000	3.57				T 1_20_15
Am_2	Am	48	212	100000	424000000	3.42				T_1_27_15
Am_3	Am	48			0	4.37				T_2_3_15
ScAm_1	Sc	48	47	100000	94000000	3.87	0.313304	0.143389		T 1_20_15
ScAm_1	Am	48	174	100000	348000000					T 1_20_15
ScAm_2	Sc	48	72	10000	14400000	3.49	0.425982	0.294537		T_1_27_15
ScAm_2	Am	48	110	100000	220000000					T_1_27_15
ScAm_3	Sc	48			0	4.36	0.379409	0.078946		T_2_3_15
ScAm_3	Am	48			0					T_2_3_15
AJM_1	NA	54	0	1	0	5.31				T 1_20_15
AJM_2	NA	54	0	1	0	5.24				T_1_27_15
AJM_3	NA	54	0	1	0	5.27				T_2_3_15
Sc_1	Sc	54	73	100000	146000000	4.68				T 1_20_15
Sc_2	Sc	54	200	10000	40000000	4.6				T_1_27_15
Sc_3	Sc	54	30	100000	60000000	4.75				T_2_3_15
Am_1	Am	54	181	100000	362000000	3.33				T 1_20_15
Am_2	Am	54	91	100000	182000000	3.34				T_1_27_15
Am_3	Am	54	184	100000	368000000	3.56				T_2_3_15
ScAm_1	Sc	54	77	10000	15400000	3.78	0.521403	0.104876		T 1_20_15
ScAm_1	Am	54	155	100000	310000000					T 1_20_15
ScAm_2	Sc	54	66	100	132000	3.46	0.675352	0.360885		T_1_27_15
ScAm_2	Am	54	134	10000	26800000					T_1_27_15
ScAm_3	Sc	54	43	100000	86000000	4.25	0.544316	0.0528641		T_2_3_15
ScAm_3	Am	54	32	100000	64000000					T_2_3_15
AJM_1	NA	60	0	1	0	5.27				T 1_20_15
AJM_2	NA	60	0	1	0	5.26				T_1_27_15
AJM_3	NA	60	0	1	0	5.26				T_2_3_15
Sc_1	Sc	60	33	100000	66000000	4.68				T 1_20_15
Sc_2	Sc	60	33	100000	66000000	4.58				T_1_27_15
Sc_3	Sc	60	300	10000	60000000	4.75				T_2_3_15
Am_1	Am	60	192	100000	384000000	3.31				T 1_20_15
Am_2	Am	60	85	100000	170000000	3.2				T_1_27_15
Am_3	Am	60	200	100000	400000000	3.58				T_2_3_15
ScAm_1	Sc	60	632	100	1264000	3.79	0.568868	0.462521		T 1_20_15
ScAm_1	Am	60	58	100000	116000000					T 1_20_15
ScAm_2	Sc	60	0	0	0	3.52	0.635254	0.481194		T_1_27_15
ScAm_2	Am	60	30	10000	6000000					T_1_27_15
ScAm_3	Sc	60	37	100000	74000000	4.31	0.412043	-0.0398734		T_2_3_15
ScAm_3	Am	60	105	10000	21000000					T_2_3_15
AJM_1	NA	66	0	1	0	5.37				T 1_20_15
AJM_2	NA	66	0	1	0	5.24				T_1_27_15
AJM_3	NA	66	0	1	0	5.2				T_2_3_15
Sc_1	Sc	66	308	10000	61600000	4.68				T 1_20_15
Sc_2	Sc	66	190	10000	38000000	4.56				T_1_27_15
Sc_3	Sc	66	36	100000	72000000	4.63				T_2_3_15
Am_1	Am	66	142	100000	284000000	3.22				T 1_20_15
Am_2	Am	66	93	100000	186000000	3.13				T_1_27_15
Am_3	Am	66	132	100000	264000000	3.31				T_2_3_15
ScAm_1	Sc	66	44	100	88000	3.84	0.637102	0.270289		T 1_20_15
ScAm_1	Am	66	147	10000	29400000					T 1_20_15
ScAm_2	Sc	66	0	1	0	3.42	0.587732	0.38603		T_1_27_15
ScAm_2	Am	66	137	100	274000					T_1_27_15
ScAm_3	Sc	66	32	100	64000	3.86	0.672886	0.427808		T_2_3_15
ScAm_3	Am	66	78	10000	15600000					T_2_3_15
AJM_1	NA	72	0	1	0	5.33				T 1_20_15
AJM_2	NA	72	0	1	0	5.21				T_1_27_15
AJM_3	NA	72	0	1	0	5.23				T_2_3_15
Sc_1	Sc	72	256	10000	51200000	4.71				T 1_20_15
Sc_2	Sc	72	150	10000	30000000	4.62				T_1_27_15
Sc_3	Sc	72	256	10000	51200000	4.66				T_2_3_15
Am_1	Am	72	152	100000	304000000	3.24				T 1_20_15
Am_2	Am	72	70	100000	140000000	3.02				T_1_27_15
Am_3	Am	72	117	100000	234000000	3.29				T_2_3_15
ScAm_1	Sc	72	0	1	0	3.7	0.673497	0.331178		T 1_20_15
ScAm_1	Am	72	63	10000	12600000					T 1_20_15
ScAm_2	Sc	72	0	1	0	3.35	0.673393	0.330893		T_1_27_15
ScAm_2	Am	72	160	100	320000					T_1_27_15
ScAm_3	Sc	72	53	10000	10600000	4.14	0.530136	0.294507		T_2_3_15
ScAm_3	Am	72	136	10000	27200000					T_2_3_15
AJM_1	NA	80	0	1	0	5.25				T 1_20_15
AJM_2	NA	80	0	1	0	5.22				T_1_27_15
AJM_3	NA	80	0	1	0	5.26				T_2_3_15
Sc_1	Sc	80	196	10000	39200000	4.65				T 1_20_15
Sc_2	Sc	80	163	10000	32600000	4.53				T_1_27_15
Sc_3	Sc	80	35	100000	70000000	4.68				T_2_3_15
Am_1	Am	80	114	10000	22800000	3.17				T 1_20_15
Am_2	Am	80	57	100000	114000000	2.97				T_2_3_15
Am_3	Am	80	92	100000	184000000	3.12				T_2_3_15
ScAm_1	Sc	80	0	1	0	3.57	0.708959	0.436525		T 1_20_15
ScAm_1	Am	80	992	100	1984000					T 1_20_15
ScAm_2	Sc	80	0	1	0	3.28	0.671346	0.303746		T_1_27_15
ScAm_2	Am	80	18	100	36000					T_1_27_15
ScAm_3	Sc	80	692	100	1384000	3.84	0.608996	0.330968		T_2_3_15
ScAm_3	Am	80	68	10000	13600000					T_2_3_15
AJM_1	NA	96	0	1	0	5.24				M_1_26_15
AJM_2	NA	96	0	1	0	5.32				M_2_2_15
AJM_3	NA	96	0	1	0	5.21				M_2_9_15
Sc_1	Sc	96	113	10000	22600000	4.62				M_1_26_15
Sc_2	Sc	96	32	100000	64000000	4.5				M_2_2_15
Sc_3	Sc	96	94	10000	18800000	4.77				M_2_9_15
Am_1	Am	96	124	10000	24800000	2.85				M_1_26_15
Am_2	Am	96	39	10000	7800000	3.05				M_2_2_15
Am_3	Am	96	167	10000	33400000	3.2				M_2_9_15
ScAm_1	Sc	96	0	1	0	3.56	0.751278	0.542888		M_1_26_15
ScAm_1	Am	96	273	100	546000					M_1_26_15
ScAm_2	Sc	96	0	1	0	3.69	0.720144	0.496029		M_2_2_15
ScAm_2	Am	96	76	100	152000					M_2_2_15
ScAm_3	Sc	96	0	1	0	3.47	0.683378	0.438035		M_2_9_15
ScAm_3	Am	96	572	100	1144000					M_2_9_15
AJM_1	NA	127	0	1	0	5.21				M_1_26_15
AJM_2	NA	127	0	1	0	5.22				M_2_2_15
AJM_3	NA	127	0	1	0	5.24				M_2_9_15
Sc_1	Sc	127	59	10000	11800000	4.65				M_1_26_15
Sc_2	Sc	127	128	10000	25600000	4.89				M_2_2_15
Sc_3	Sc	127	30	10000	6000000	4.72				M_2_9_15
Am_1	Am	127	37	10000	7400000	2.85				M_1_26_15
Am_2	Am	127	20	10000	4000000	2.93				M_2_2_15
Am_3	Am	127	75	10000	15000000	2.94				M_2_9_15
ScAm_1	Sc	127	0	1	0	3.55	0.657023	0.329649		M_1_26_15
ScAm_1	Am	127	360	1	7200					M_1_26_15
ScAm_2	Sc	127	0	1	0	3.45	0.568542	0.352538		M_2_2_15
ScAm_2	Am	127	0	1	0					M_2_2_15
ScAm_3	Sc	127	0	1	0	3.4	0.712572	0.433958		M_2_9_15
ScAm_3	Am	127	57	100	114000					M_2_9_15
