# Supplementary material for: Metabolite exchange between microbiome members produces compounds that influence Drosophila behavior
Source: eLife. 2017 Jan 9;6:e18855. doi: 10.7554/eLife.18855 (PMC5222558; doi:10.7554/eLife.18855)
Supplement: Figure 3—source data 1. — DOI: http://dx.doi.org/10.7554/eLife.18855.015 [file elife-18855-fig3-data1.xlsx]

## Sheet: Exp1
Experiment #	Fly Strain	Test Arm	Control Arm	Test Side	Time_Experiment	Center Flies	Experiment #	Left side	right side	Left Side RI	Test Arm	Control Arm	Test Arm RI		Total Flies
1	Canton-S (CR)	Mock	Mock	L	08:20:00	7	1	35	26	0.132353	35	26	0.132353	-0.0148601	68	69
2	Canton-S (CR)	Mock	Mock	R	08:25:00	12	2	30	31	-0.0136986	31	30	0.0136986		73
3	Canton-S (CR)	Mock	Mock	L	08:30:00	7	3	30	31	-0.0147059	30	31	-0.0147059		68
4	Canton-S (CR)	Mock	Mock	R	08:35:00	8	4	32	18	0.241379	18	32	-0.241379		58
5	Canton-S (CR)	Mock	Mock	L	08:40:00	7	5	44	34	0.117647	44	34	0.117647		85
6	Canton-S (CR)	Mock	Mock	R	08:45:00	10	6	29	23	0.0967742	23	29	-0.0967742		62
7	Canton-S (CR)	SCAM 67 h	SC + Am	L	09:00:00	4	7	48	12	0.5625	48	12	0.5625	0.483162	64	63.6667
8	Canton-S (CR)	SCAM 67 h	SC + Am	R	09:05:00	3	8	16	52	-0.507042	52	16	0.507042		71
9	Canton-S (CR)	SCAM 67 h	SC + Am	L	09:10:00	3	9	46	10	0.610169	46	10	0.610169		59
10	Canton-S (CR)	SCAM 67 h	SC + Am	R	09:15:00	1	10	19	44	-0.390625	44	19	0.390625		64
11	Canton-S (CR)	SCAM 67 h	SC + Am	L	09:20:00	3	11	35	13	0.431373	35	13	0.431373		51
12	Canton-S (CR)	SCAM 67 h	SC + Am	R	09:25:00	2	12	21	50	-0.39726	50	21	0.39726		73
13	Or83b2	SCAM 67 h	SC + Am	L	09:50:00	1	13	30	24	0.109091	30	24	0.109091	0.127612	55	55.6667
14	or83b2	SCAM 67 h	SC + Am	R	09:55:00	2	14	16	36	-0.37037	36	16	0.37037		54
15	or83b2	SCAM 67 h	SC + Am	L	10:00:00	1	15	35	31	0.0597015	35	31	0.0597015		67
16	or83b2	SCAM 67 h	SC + Am	R	10:05:00	0	16	26	25	0.0196078	25	26	-0.0196078		51
17	or83b2	SCAM 67 h	SC + Am	L	10:10:00	1	17	29	18	0.229167	29	18	0.229167		48
18	or83b2	SCAM 67 h	SC + Am	R	10:15:00	2	18	28	29	-0.0169492	29	28	0.0169492		59
19	or35a	SCAM 67 h	SC + Am	L	10:40:00	2	19	38	15	0.418182	38	15	0.418182	0.469551	55	65.8333
20	or35a	SCAM 67 h	SC + Am	R	10:45:00	9	20	23	50	-0.329268	50	23	0.329268		82
21	or35a	SCAM 67 h	SC + Am	L	10:50:00	5	21	51	15	0.507042	51	15	0.507042		71
22	or35a	SCAM 67 h	SC + Am	R	10:55:00	1	22	12	47	-0.583333	47	12	0.583333		60
23	or35a	SCAM 67 h	SC + Am	L	11:00:00	5	23	34	11	0.46	34	11	0.46		50
24	or35a	SCAM 67 h	SC + Am	R	11:05:00	3	24	17	57	-0.519481	57	17	0.519481		77
25	or42b	SCAM 67 h	SC + Am	L	11:30:00	3	25	42	16	0.42623	42	16	0.42623	0.197569	61	63.5
26	or42b	SCAM 67 h	SC + Am	R	11:35:00	3	26	35	46	-0.130952	46	35	0.130952		84
27	or42b	SCAM 67 h	SC + Am	L	11:40:00	6	27	34	18	0.275862	34	18	0.275862		58
28	or42b	SCAM 67 h	SC + Am	R	11:45:00	3	28	22	29	-0.12963	29	22	0.12963		54
29	or42b	SCAM 67 h	SC + Am	L	11:50:00	4	29	36	23	0.206349	36	23	0.206349		63
30	or42b	SCAM 67 h	SC + Am	R	11:55:00	6	30	27	28	-0.0163934	28	27	0.0163934		61
31	Canton-S (CR)	SCAM 74 h	SC + Am	L	16:00:00	4	31	36	18	0.310345	36	18	0.310345	0.447701	58	69.1667
32	Canton-S (CR)	SCAM 74 h	SC + Am	R	16:05:00	4	32	11	56	-0.633803	56	11	0.633803		71
33	Canton-S (CR)	SCAM 74 h	SC + Am	L	16:10:00	5	33	45	28	0.217949	45	28	0.217949		78
34	Canton-S (CR)	SCAM 74 h	SC + Am	R	16:15:00	1	34	16	51	-0.514706	51	16	0.514706		68
35	Canton-S (CR)	SCAM 74 h	SC + Am	L	16:20:00	0	35	57	16	0.561644	57	16	0.561644		73
36	Canton-S (CR)	SCAM 74 h	SC + Am	R	16:25:00	3	36	17	47	-0.447761	47	17	0.447761		67

## Sheet: Exp2
Experiment #	Fly Strain	Test Arm	Control Arm	Test Side	Time_Experiment	Center Flies	Experiment #	Left side	right side	Left Side RI	Test Arm	Control Arm	Test Arm RI		Total Flies
1	Canton-S (CR)	Mock	Mock	L	08:20:00	5	1	28	33	-0.0757576	28	33	-0.0757576	-0.0186497	66	71.8333
2	Canton-S (CR)	Mock	Mock	R	08:25:00	8	2	30	27	0.0461538	27	30	-0.0461538		65
3	Canton-S (CR)	Mock	Mock	L	08:30:00	6	3	45	31	0.170732	45	31	0.170732		82
4	Canton-S (CR)	Mock	Mock	R	08:35:00	2	4	35	30	0.0746269	30	35	-0.0746269		67
5	Canton-S (CR)	Mock	Mock	L	08:40:00	5	5	38	37	0.0125	38	37	0.0125		80
6	Canton-S (CR)	Mock	Mock	R	08:45:00	4	6	37	30	0.0985915	30	37	-0.0985915		71
7	Canton-S (CR)	SCAM 91 h	SC + Am	L	09:00:00	1	7	49	24	0.337838	49	24	0.337838	0.381041	74	77.6667
8	Canton-S (CR)	SCAM 91 h	SC + Am	R	09:05:00	6	8	30	55	-0.274725	55	30	0.274725		91
9	Canton-S (CR)	SCAM 91 h	SC + Am	L	09:10:00	0	9	51	24	0.36	51	24	0.36		75
10	Canton-S (CR)	SCAM 91 h	SC + Am	R	09:15:00	4	10	18	54	-0.473684	54	18	0.473684		76
11	Canton-S (CR)	SCAM 91 h	SC + Am	L	09:20:00	3	11	50	22	0.373333	50	22	0.373333		75
12	Canton-S (CR)	SCAM 91 h	SC + Am	R	09:25:00	4	12	18	53	-0.466667	53	18	0.466667		75
13	Or83b2	SCAM 91 h	SC + Am	L	09:50:00	3	13	29	26	0.0517241	29	26	0.0517241	0.078371	58	55
14	or83b2	SCAM 91 h	SC + Am	R	09:55:00	0	14	28	33	-0.0819672	33	28	0.0819672		61
15	or83b2	SCAM 91 h	SC + Am	L	10:00:00	2	15	31	10	0.488372	31	10	0.488372		43
16	or83b2	SCAM 91 h	SC + Am	R	10:05:00	1	16	29	28	0.0172414	28	29	-0.0172414		58
17	or83b2	SCAM 91 h	SC + Am	L	10:10:00	0	17	29	30	-0.0169492	29	30	-0.0169492		59
18	or83b2	SCAM 91 h	SC + Am	R	10:15:00	1	18	28	22	0.117647	22	28	-0.117647		51
19	or35a	SCAM 91 h	SC + Am	L	10:40:00	4	19	53	16	0.506849	53	16	0.506849	0.439584	73	73.3333
20	or35a	SCAM 91 h	SC + Am	R	10:45:00	4	20	21	47	-0.361111	47	21	0.361111		72
21	or35a	SCAM 91 h	SC + Am	L	10:50:00	3	21	40	25	0.220588	40	25	0.220588		68
22	or35a	SCAM 91 h	SC + Am	R	10:55:00	4	22	16	55	-0.52	55	16	0.52		75
23	or35a	SCAM 91 h	SC + Am	L	11:00:00	3	23	55	15	0.547945	55	15	0.547945		73
24	or35a	SCAM 91 h	SC + Am	R	11:05:00	1	24	20	58	-0.481013	58	20	0.481013		79
25	or42b	SCAM 91 h	SC + Am	L	11:30:00	2	25	54	33	0.235955	54	33	0.235955	0.213185	89	69.1667
26	or42b	SCAM 91 h	SC + Am	R	11:35:00	3	26	23	33	-0.169492	33	23	0.169492		59
27	or42b	SCAM 91 h	SC + Am	L	11:40:00	1	27	42	11	0.574074	42	11	0.574074		54
28	or42b	SCAM 91 h	SC + Am	R	11:45:00	5	28	33	38	-0.0657895	38	33	0.0657895		76
29	or42b	SCAM 91 h	SC + Am	L	11:50:00	3	29	37	28	0.132353	37	28	0.132353		68
30	or42b	SCAM 91 h	SC + Am	R	11:55:00	2	30	30	37	-0.101449	37	30	0.101449		69
31	Canton-S (CR)	SCAM 98 h	SC + Am	L	16:00:00	3	31	61	20	0.488095	61	20	0.488095	0.501967	84	73.5
32	Canton-S (CR)	SCAM 98 h	SC + Am	R	16:05:00	6	32	10	57	-0.643836	57	10	0.643836		73
33	Canton-S (CR)	SCAM 98 h	SC + Am	L	16:10:00	3	33	41	19	0.349206	41	19	0.349206		63
34	Canton-S (CR)	SCAM 98 h	SC + Am	R	16:15:00	6	34	15	51	-0.5	51	15	0.5		72
35	Canton-S (CR)	SCAM 98 h	SC + Am	L	16:20:00	4	35	51	17	0.472222	51	17	0.472222		72
36	Canton-S (CR)	SCAM 98 h	SC + Am	R	16:25:00	2	36	16	59	-0.558442	59	16	0.558442		77

## Sheet: Exp3
Experiment #	Fly Strain	Test Arm	Control Arm	Test Side	Time_Experiment	Center Flies	Experiment #	Left side	right side	Left Side RI	Test Arm	Control Arm	Test Arm RI		Total Flies
1	Canton-S (CR)	Mock	Mock	L	08:20:00	8	1	35	24	0.164179	35	24	0.164179	0.045973	67
2	Canton-S (CR)	Mock	Mock	R	08:25:00	4	2	26	40	-0.2	40	26	0.2		70
3	Canton-S (CR)	Mock	Mock	L	08:30:00	2	3	25	33	-0.133333	25	33	-0.133333		60
4	Canton-S (CR)	Mock	Mock	R	08:35:00	4	4	40	26	0.2	26	40	-0.2		70
5	Canton-S (CR)	Mock	Mock	L	08:40:00	4	5	43	19	0.363636	43	19	0.363636		66
6	Canton-S (CR)	Mock	Mock	R	08:45:00	6	6	30	23	0.118644	23	30	-0.118644		59
7	Canton-S (CR)	SCAM 115 h	SC + Am	L	09:00:00	2	7	42	17	0.409836	42	17	0.409836	0.325991	61
8	Canton-S (CR)	SCAM 115 h	SC + Am	R	09:05:00	7	8	25	44	-0.25	44	25	0.25		76
9	Canton-S (CR)	SCAM 115 h	SC + Am	L	09:10:00	1	9	58	24	0.409639	58	24	0.409639		83
10	Canton-S (CR)	SCAM 115 h	SC + Am	R	09:15:00	0	10	25	40	-0.230769	40	25	0.230769		65
11	Canton-S (CR)	SCAM 115 h	SC + Am	L	09:20:00	2	11	54	20	0.447368	54	20	0.447368		76
12	Canton-S (CR)	SCAM 115 h	SC + Am	R	09:25:00	3	12	27	42	-0.208333	42	27	0.208333		72
13	Or83b2	SCAM 115 h	SC + Am	L	09:50:00	1	13	34	24	0.169492	34	24	0.169492	0.15789	59
14	or83b2	SCAM 115 h	SC + Am	R	09:55:00	4	14	30	33	-0.0447761	33	30	0.0447761		67
15	or83b2	SCAM 115 h	SC + Am	L	10:00:00	2	15	37	20	0.288136	37	20	0.288136		59
16	or83b2	SCAM 115 h	SC + Am	R	10:05:00	3	16	28	31	-0.0483871	31	28	0.0483871		62
17	or83b2	SCAM 115 h	SC + Am	L	10:10:00	2	17	40	16	0.413793	40	16	0.413793		58
18	or83b2	SCAM 115 h	SC + Am	R	10:15:00	1	18	29	28	0.0172414	28	29	-0.0172414		58
19	or35a	SCAM 115 h	SC + Am	L	10:40:00	2	19	56	15	0.561644	56	15	0.561644	0.394099	73
20	or35a	SCAM 115 h	SC + Am	R	10:45:00	2	20	17	48	-0.462687	48	17	0.462687		67
21	or35a	SCAM 115 h	SC + Am	L	10:50:00	5	21	43	27	0.213333	43	27	0.213333		75
22	or35a	SCAM 115 h	SC + Am	R	10:55:00	2	22	19	46	-0.402985	46	19	0.402985		67
23	or35a	SCAM 115 h	SC + Am	L	11:00:00	1	23	59	22	0.45122	59	22	0.45122		82
24	or35a	SCAM 115 h	SC + Am	R	11:05:00	0	24	24	42	-0.272727	42	24	0.272727		66
25	or42b	SCAM 115 h	SC + Am	L	11:30:00	3	25	33	23	0.169492	33	23	0.169492	0.157241	59
26	or42b	SCAM 115 h	SC + Am	R	11:35:00	2	26	24	28	-0.0740741	28	24	0.0740741		54
27	or42b	SCAM 115 h	SC + Am	L	11:40:00	3	27	47	13	0.539683	47	13	0.539683		63
28	or42b	SCAM 115 h	SC + Am	R	11:45:00	3	28	44	37	0.0833333	37	44	-0.0833333		84
29	or42b	SCAM 115 h	SC + Am	L	11:50:00	3	29	42	26	0.225352	42	26	0.225352		71
30	or42b	SCAM 115 h	SC + Am	R	11:55:00	4	30	25	26	-0.0181818	26	25	0.0181818		55

## Sheet: Dec21_23_populations
DATE	Condition	Microbe	Counts	Dilution	Fraction/mL	CFU/mL	RI
2016-12-21	Sc_67	Sc	49	100000	20	98000000
2016-12-21	Am_67	Am	54	100000	20	108000000
2016-12-21	ScAm_67	Sc	0	1	20	0	0.483162
2016-12-21	ScAm_67	Am	17	10000	20	3400000	0.483162			3400000	0.483162
2016-12-21	Sc_74	Sc	51	100000	20	102000000
2016-12-21	Am_74	Am	34	100000	20	68000000
2016-12-21	ScAm_74	Sc	0	1	20	0	0.447701
2016-12-21	ScAm_74	Am	22	10000	20	4400000	0.447701			4400000	0.447701
2016-12-22	Sc_91	Sc	76	10000	20	15200000
2016-12-22	Am_91	Am	26	100000	20	52000000
2016-12-22	ScAm_91	Sc	0	1	20	0	0.381041
2016-12-22	ScAm_91	Am	257	100	20	514000	0.381041			514000	0.381041
2016-12-22	Sc_98	Sc	67	100000	20	134000000
2016-12-22	Am_98	Am	25	100000	20	50000000
2016-12-22	ScAm_98	Sc	0	1	20	0	0.501967
2016-12-22	ScAm_98	Am	40	100	20	80000	0.501967			80000	0.501967
2016-12-23	Sc_115	Sc	91	10000	20	18200000
2016-12-23	Am_115	Am	18	100000	20	36000000
2016-12-23	ScAm_115	Sc	0	1	20	0	0.325991
2016-12-23	ScAm_115	Am	32	10000	20	6400000	0.325991			6400000	0.325991
2016-01-04	Sc_67	Sc	102	100000	20	204000000
2016-01-04	Am_67	Am	31	100000	20	62000000
2016-01-04	SCAM_67	Sc	0	0	20	0	0.515483
2016-01-04	SCAM_67	Am	96	10000	20	19200000	0.515483			19200000	0.515483
2016-01-04	Sc_74	Sc	54	100000	20	108000000
2016-01-04	Am_74	Am	66	100000	20	132000000
2016-01-04	SCAM_74	Sc	0	1	20	0	0.560105
2016-01-04	SCAM_74	Am	29	10000	20	5800000	0.560105			5800000	0.560105
2016-01-05	Sc_91	Sc	178	10000	20	35600000
2016-01-05	Am_91	Am	187	10000	20	37400000
2016-01-05	SCAM_91	Sc	0	1	20	0	0.54477
2016-01-05	SCAM_91	Am	85	1	20	1700	0.54477			1700	0.54477
2016-01-05	Sc_98	Sc	236	10000	20	47200000
2016-01-05	Am_98	Am	120	10000	20	24000000
2016-01-05	SCAM_98	Sc	0	1	20	0	0.470612
2016-01-05	SCAM_98	Am	700	100	20	1400000	0.470612			1400000	0.470612
2016-01-06	Sc_115	Sc	112	10000	20	22400000
2016-01-06	Am_115	Am	280	10000	20	56000000
2016-01-06	SCAM_115	Sc	0	1	20	0	0.281458
2016-01-06	SCAM_115	Am	0	1	20	0	0.281458			0	0.281458
2016-01-07	Sc_139	Sc	91	10000	20	18200000
2016-01-07	Am_139	Am	114	10000	20	22800000
2016-01-07	SCAM_139	Sc	0	1	20	0	0.0372088
2016-01-07	SCAM_139	Am	0	1	20	0	0.0372088			0	0.0372088
2016-01-08	Sc_163	Sc	18	10000	20	3600000
2016-01-08	Am_163	Am	31	10000	20	6200000
2016-01-08	SCAM_163	Sc	0	1	20	0	0.16022
2016-01-08	SCAM_163	Am	0	1	20	0	0.16022			0	0.16022
2016-01-25	SCAM_67	Sc	13	1	20	260	0.426544
2016-01-25	SCAM_67	Am	168	10000	20	33600000	0.426544			33600000	0.426544
2016-01-26	SCAM_91	SC	0	1	20	0	0.406007
2016-01-26	SCAM_91	Am	373	100	20	746000	0.406007			746000	0.406007
2016-01-27	SCAM_115	SC	0	1	20	0	0.42824
2016-01-27	SCAM_115	Am	192	100	20	384000	0.42824			384000	0.42824
2016-01-28	SCAM_139	SC	0	1	20	0	0.444871
2016-01-28	SCAM_139	Am	494	100	20	988000	0.444871			988000	0.444871
2016-01-29	SCAM_163	SC	0	1	20	0	0.431393
2016-01-29	SCAM_163	Am	88	100	20	176000	0.431393			176000	0.431393
2016-01-29	SC_163	SC	50	10000	20	10000000
2016-01-29	AM_163	Am	73	10000	20	14600000
2016-02-01	SC_67	SC	568	10000	20	113600000
2016-02-01	AM_67	Am	444	10000	20	88800000
2016-02-01	SCAM_67	Sc	0	1	20	0	0.455609
2016-02-01	SCAM_67	Am	47	10000	20	9400000	0.455609			9400000	0.455609
2016-02-02	SCAM_91	Sc	0	1	20	0	0.389885
2016-02-02	SCAM_91	Am	21	10000	20	4200000	0.389885			4200000	0.389885
2016-02-03	SCAM_115	Sc	0	1	20	0	0.374962
2016-02-03	SCAM_115	Am	15	10000	20	3000000	0.374962			3000000	0.374962
2016-02-04	SCAM_139	Sc	0	1	20	0	0.137497
2016-02-04	SCAM_139	Am	45	10000	20	9000000	0.137497			9000000	0.137497
2016-02-05	SCAM_163	Sc	0	1	20	0	0.32707
2016-02-05	SCAM_163	Am	20	10000	20	4000000	0.32707			4000000	0.32707
2016-02-05	SC_163	Sc	198	10000	20	39600000
2016-02-05	Am_163	Am	76	10000	20	15200000

## Sheet: Exp4
Experiment #	Fly Strain	Test Arm	Control Arm	Test Side	Time_Experiment	Center Flies	Experiment #	Left side	right side	Left Side RI	Test Arm	Control Arm	Test Arm RI		Total Flies
1	Canton-S (CR)	Mock	Mock	L	08:20:00	5	1	39	25	0.202899	39	25	0.202899	0.0285971	69	64.8333
2	Canton-S (CR)	Mock	Mock	R	08:25:00	8	2	28	28	0	28	28	0		64
3	Canton-S (CR)	Mock	Mock	L	08:30:00	5	3	27	27	0	27	27	0		59
4	Canton-S (CR)	Mock	Mock	R	08:35:00	6	4	26	26	0	26	26	0		58
5	Canton-S (CR)	Mock	Mock	L	08:40:00	9	5	27	25	0.0327869	27	25	0.0327869		61
6	Canton-S (CR)	Mock	Mock	R	08:45:00	7	6	38	33	0.0641026	33	38	-0.0641026		78
7	Canton-S (CR)	SCAM 67 h	SC + Am	L	09:00:00	2	7	55	6	0.777778	55	6	0.777778	0.515483	63	65.6667
8	Canton-S (CR)	SCAM 67 h	SC + Am	R	09:05:00	8	8	19	38	-0.292308	38	19	0.292308		65
9	Canton-S (CR)	SCAM 67 h	SC + Am	L	09:10:00	1	9	52	11	0.640625	52	11	0.640625		64
10	Canton-S (CR)	SCAM 67 h	SC + Am	R	09:15:00	4	10	18	48	-0.428571	48	18	0.428571		70
11	Canton-S (CR)	SCAM 67 h	SC + Am	L	09:20:00	5	11	48	14	0.507463	48	14	0.507463		67
12	Canton-S (CR)	SCAM 67 h	SC + Am	R	09:25:00	2	12	17	46	-0.446154	46	17	0.446154		65
13	Or83b2	SCAM 67 h	SC + Am	L	09:50:00		13			#DIV/0!	0	0	#DIV/0!	0.213522	0	46.6
14	or83b2	SCAM 67 h	SC + Am	R	09:55:00	3	14	17	29	-0.244898	29	17	0.244898		49
15	or83b2	SCAM 67 h	SC + Am	L	10:00:00	2	15	23	16	0.170732	23	16	0.170732		41
16	or83b2	SCAM 67 h	SC + Am	R	10:05:00	1	16	24	32	-0.140351	32	24	0.140351		57
17	or83b2	SCAM 67 h	SC + Am	L	10:10:00	1	17	27	15	0.27907	27	15	0.27907		43
18	or83b2	SCAM 67 h	SC + Am	R	10:15:00	3	18	15	25	-0.232558	25	15	0.232558		43
19	or35a	SCAM 67 h	SC + Am	L	10:40:00	6	19	49	19	0.405405	49	19	0.405405	0.443857	74	63
20	or35a	SCAM 67 h	SC + Am	R	10:45:00	3	20	5	53	-0.786885	53	5	0.786885		61
21	or35a	SCAM 67 h	SC + Am	L	10:50:00	4	21	37	25	0.181818	37	25	0.181818		66
22	or35a	SCAM 67 h	SC + Am	R	10:55:00	6	22	11	56	-0.616438	56	11	0.616438		73
23	or35a	SCAM 67 h	SC + Am	L	11:00:00	4	23	25	21	0.08	25	21	0.08		50
24	or35a	SCAM 67 h	SC + Am	R	11:05:00	8	24	7	39	-0.592593	39	7	0.592593		54
25	or42b	SCAM 67 h	SC + Am	L	11:30:00	5	25	35	24	0.171875	35	24	0.171875	0.174919	64	63.3333
26	or42b	SCAM 67 h	SC + Am	R	11:35:00	1	26	30	39	-0.128571	39	30	0.128571		70
27	or42b	SCAM 67 h	SC + Am	L	11:40:00	5	27	28	25	0.0517241	28	25	0.0517241		58
28	or42b	SCAM 67 h	SC + Am	R	11:45:00	2	28	26	33	-0.114754	33	26	0.114754		61
29	or42b	SCAM 67 h	SC + Am	L	11:50:00	1	29	40	22	0.285714	40	22	0.285714		63
30	or42b	SCAM 67 h	SC + Am	R	11:55:00	3	30	21	40	-0.296875	40	21	0.296875		64
31	Canton-S (CR)	SCAM 74 h	SC + Am	L	16:00:00	8	31	35	15	0.344828	35	15	0.344828	0.560105	58	64.8333
32	Canton-S (CR)	SCAM 74 h	SC + Am	R	16:05:00	2	32	7	50	-0.728814	50	7	0.728814		59
33	Canton-S (CR)	SCAM 74 h	SC + Am	L	16:10:00	0	33	59	9	0.735294	59	9	0.735294		68
34	Canton-S (CR)	SCAM 74 h	SC + Am	R	16:15:00	4	34	14	45	-0.492063	45	14	0.492063		63
35	Canton-S (CR)	SCAM 74 h	SC + Am	L	16:20:00	6	35	47	15	0.470588	47	15	0.470588		68
36	Canton-S (CR)	SCAM 74 h	SC + Am	R	16:25:00	4	36	13	56	-0.589041	56	13	0.589041		73

## Sheet: Exp5
Experiment #	Fly Strain	Test Arm	Control Arm	Test Side	Time_Experiment	Center Flies	Experiment #	Left side	right side	Left Side RI	Test Arm	Control Arm	Test Arm RI		Total Flies
1	Canton-S (CR)	Mock	Mock	L	08:20:00	8	1	34	22	0.1875	34	22	0.1875	-0.0526214	64	60.3333
2	Canton-S (CR)	Mock	Mock	R	08:25:00	4	2	21	23	-0.0416667	23	21	0.0416667		48
3	Canton-S (CR)	Mock	Mock	L	08:30:00	11	3	20	31	-0.177419	20	31	-0.177419		62
4	Canton-S (CR)	Mock	Mock	R	08:35:00	9	4	42	22	0.273973	22	42	-0.273973		73
5	Canton-S (CR)	Mock	Mock	L	08:40:00	8	5	18	35	-0.278689	18	35	-0.278689		61
6	Canton-S (CR)	Mock	Mock	R	08:45:00	6	6	19	29	-0.185185	29	19	0.185185		54
7	Canton-S (CR)	SCAM 91 h	SC + Am	L	09:00:00	5	7	31	16	0.288462	31	16	0.288462	0.54477	52	58.8333
8	Canton-S (CR)	SCAM 91 h	SC + Am	R	09:05:00	1	8	4	45	-0.82	45	4	0.82		50
9	Canton-S (CR)	SCAM 91 h	SC + Am	L	09:10:00	4	9	42	10	0.571429	42	10	0.571429		56
10	Canton-S (CR)	SCAM 91 h	SC + Am	R	09:15:00	2	10	9	51	-0.677419	51	9	0.677419		62
11	Canton-S (CR)	SCAM 91 h	SC + Am	L	09:20:00	2	11	42	21	0.323077	42	21	0.323077		65
12	Canton-S (CR)	SCAM 91 h	SC + Am	R	09:25:00	2	12	13	53	-0.588235	53	13	0.588235		68
13	Or83b2	SCAM 91 h	SC + Am	L	09:50:00	4	13	19	25	-0.125	19	25	-0.125	0.154737	48	50.6667
14	or83b2	SCAM 91 h	SC + Am	R	09:55:00	8	14	14	26	-0.25	26	14	0.25		48
15	or83b2	SCAM 91 h	SC + Am	L	10:00:00	2	15	30	25	0.0877193	30	25	0.0877193		57
16	or83b2	SCAM 91 h	SC + Am	R	10:05:00	3	16	15	32	-0.34	32	15	0.34		50
17	or83b2	SCAM 91 h	SC + Am	L	10:10:00	3	17	24	16	0.186047	24	16	0.186047		43
18	or83b2	SCAM 91 h	SC + Am	R	10:15:00	5	18	21	32	-0.189655	32	21	0.189655		58
19	or35a	SCAM 91 h	SC + Am	L	10:40:00	4	19	18	29	-0.215686	18	29	-0.215686	0.121572	51	53.3333
20	or35a	SCAM 91 h	SC + Am	R	10:45:00	6	20	20	41	-0.313433	41	20	0.313433		67
21	or35a	SCAM 91 h	SC + Am	L	10:50:00	5	21	20	22	-0.0425532	20	22	-0.0425532		47
22	or35a	SCAM 91 h	SC + Am	R	10:55:00	2	22	19	28	-0.183673	28	19	0.183673		49
23	or35a	SCAM 91 h	SC + Am	L	11:00:00	2	23	29	22	0.132075	29	22	0.132075		53
24	or35a	SCAM 91 h	SC + Am	R	11:05:00	4	24	15	34	-0.358491	34	15	0.358491		53
25	or42b	SCAM 91 h	SC + Am	L	11:30:00	8	25	29	24	0.0819672	29	24	0.0819672	0.186167	61	62
26	or42b	SCAM 91 h	SC + Am	R	11:35:00	7	26	25	27	-0.0338983	27	25	0.0338983		59
27	or42b	SCAM 91 h	SC + Am	L	11:40:00	2	27	49	26	0.298701	49	26	0.298701		77
28	or42b	SCAM 91 h	SC + Am	R	11:45:00	4	28	22	27	-0.0943396	27	22	0.0943396		53
29	or42b	SCAM 91 h	SC + Am	L	11:50:00	4	29	40	21	0.292308	40	21	0.292308		65
30	or42b	SCAM 91 h	SC + Am	R	11:55:00	5	30	17	35	-0.315789	35	17	0.315789		57
31	Canton-S (CR)	SCAM 98 h	SC + Am	L	16:00:00	5	31	53	16	0.5	53	16	0.5	0.470612	74	60.5
32	Canton-S (CR)	SCAM 98 h	SC + Am	R	16:05:00	8	32	14	51	-0.506849	51	14	0.506849		73
33	Canton-S (CR)	SCAM 98 h	SC + Am	L	16:10:00	4	33	47	11	0.580645	47	11	0.580645		62
34	Canton-S (CR)	SCAM 98 h	SC + Am	R	16:15:00	7	34	10	26	-0.372093	26	10	0.372093		43
35	Canton-S (CR)	SCAM 98 h	SC + Am	L	16:20:00	6	35	38	19	0.301587	38	19	0.301587		63
36	Canton-S (CR)	SCAM 98 h	SC + Am	R	16:25:00	7	36	7	34	-0.5625	34	7	0.5625		48

## Sheet: Exp6
Experiment #	Fly Strain	Test Arm	Control Arm	Test Side	Time_Experiment	Center Flies	Experiment #	Left side	right side	Left Side RI	Test Arm	Control Arm	Test Arm RI		Total Flies
1	Canton-S (CR)	Mock	Mock	L	08:20:00		1			#DIV/0!	0	0	#DIV/0!	0.0408535	0	47.3333
2	Canton-S (CR)	Mock	Mock	R	08:25:00	9	2	22	32	-0.15873	32	22	0.15873		63
3	Canton-S (CR)	Mock	Mock	L	08:30:00	4	3	30	21	0.163636	30	21	0.163636		55
4	Canton-S (CR)	Mock	Mock	R	08:35:00	9	4	16	28	-0.226415	28	16	0.226415		53
5	Canton-S (CR)	Mock	Mock	L	08:40:00	7	5	25	26	-0.0172414	25	26	-0.0172414		58
6	Canton-S (CR)	Mock	Mock	R	08:45:00	9	6	32	14	0.327273	14	32	-0.327273		55
7	Canton-S (CR)	SCAM 115 h	SC + Am	L	09:00:00	1	7	46	26	0.273973	46	26	0.273973	0.281458	73	62.8333
8	Canton-S (CR)	SCAM 115 h	SC + Am	R	09:05:00	3	8	24	30	-0.105263	30	24	0.105263		57
9	Canton-S (CR)	SCAM 115 h	SC + Am	L	09:10:00	2	9	40	25	0.223881	40	25	0.223881		67
10	Canton-S (CR)	SCAM 115 h	SC + Am	R	09:15:00	2	10	13	44	-0.525424	44	13	0.525424		59
11	Canton-S (CR)	SCAM 115 h	SC + Am	L	09:20:00	2	11	40	21	0.301587	40	21	0.301587		63
12	Canton-S (CR)	SCAM 115 h	SC + Am	R	09:25:00	5	12	19	34	-0.258621	34	19	0.258621		58
13	Or83b2	SCAM 115 h	SC + Am	L	09:50:00	2	13	39	18	0.355932	39	18	0.355932	0.326882	59	59.25
14	or83b2	SCAM 115 h	SC + Am	R	09:55:00	2	14	19	46	-0.402985	46	19	0.402985		67
15	or83b2	SCAM 115 h	SC + Am	L	10:00:00	1	15	26	21	0.104167	26	21	0.104167		48
16	or83b2	SCAM 115 h	SC + Am	R	10:05:00	3	16	16	44	-0.444444	44	16	0.444444		63
17	or35a	SCAM 115 h	SC + Am	L	10:30:00	8	17	31	20	0.186441	31	20	0.186441	0.122064	59	42.3333
18	or35a	SCAM 115 h	SC + Am	R	10:35:00	3	18	9	36	-0.5625	36	9	0.5625		48
19	or35a	SCAM 115 h	SC + Am	L	10:40:00	4	19	15	30	-0.306122	15	30	-0.306122		49
20	or35a	SCAM 115 h	SC + Am	R	10:45:00	9	20	15	24	-0.1875	24	15	0.1875		48
21	or35a	SCAM 115 h	SC + Am	L	10:50:00	7	21	21	22	-0.02	21	22	-0.02		50
22	or35a	SCAM 115 h	SC + Am	R	10:55:00		22			#DIV/0!	0	0	#DIV/0!		0
23	or42b	SCAM 115 h	SC + Am	L	11:20:00	3	23	33	27	0.0952381	33	27	0.0952381	0.258776	63	67
24	or42b	SCAM 115 h	SC + Am	R	11:25:00	7	24	30	27	0.046875	27	30	-0.046875		64
25	or42b	SCAM 115 h	SC + Am	L	11:30:00	1	25	50	18	0.463768	50	18	0.463768		69
26	or42b	SCAM 115 h	SC + Am	R	11:35:00	3	26	24	43	-0.271429	43	24	0.271429		70
27	or42b	SCAM 115 h	SC + Am	L	11:40:00	2	27	52	18	0.472222	52	18	0.472222		72
28	or42b	SCAM 115 h	SC + Am	R	11:45:00	7	28	19	38	-0.296875	38	19	0.296875		64

## Sheet: Exp7
Experiment #	Fly Strain	Test Arm	Control Arm	Test Side	Time_Experiment	Center Flies	Experiment #	Left side	right side	Left Side RI	Test Arm	Control Arm	Test Arm RI		Total Flies
1	Canton-S (CR)	Mock	Mock	L	08:20:00	6	1	35	42	-0.0843373	35	42	-0.0843373	-0.010891	83	62.1667
2	Canton-S (CR)	Mock	Mock	R	08:25:00	7	2	23	26	-0.0535714	26	23	0.0535714		56
3	Canton-S (CR)	Mock	Mock	L	08:30:00	8	3	32	21	0.180328	32	21	0.180328		61
4	Canton-S (CR)	Mock	Mock	R	08:35:00	7	4	25	16	0.1875	16	25	-0.1875		48
5	Canton-S (CR)	Mock	Mock	L	08:40:00	6	5	30	25	0.0819672	30	25	0.0819672		61
6	Canton-S (CR)	Mock	Mock	R	08:45:00	5	6	33	26	0.109375	26	33	-0.109375		64
7	Canton-S (CR)	SCAM 139 h	SC + Am	L	09:00:00	0	7	30	33	-0.047619	30	33	-0.047619	0.0372088	63	66.1667
8	Canton-S (CR)	SCAM 139 h	SC + Am	R	09:05:00	2	8	43	28	0.205479	28	43	-0.205479		73
9	Canton-S (CR)	SCAM 139 h	SC + Am	L	09:10:00	2	9	52	25	0.341772	52	25	0.341772		79
10	Canton-S (CR)	SCAM 139 h	SC + Am	R	09:15:00	3	10	34	29	0.0757576	29	34	-0.0757576		66
11	Canton-S (CR)	SCAM 139 h	SC + Am	L	09:20:00	3	11	28	33	-0.078125	28	33	-0.078125		64
12	Canton-S (CR)	SCAM 139 h	SC + Am	R	09:25:00	3	12	17	32	-0.288462	32	17	0.288462		52
13	Or83b2	SCAM 139 h	SC + Am	L	09:50:00	4	13	27	15	0.26087	27	15	0.26087	0.103803	46	50
14	or83b2	SCAM 139 h	SC + Am	R	09:55:00	5	14	38	30	0.109589	30	38	-0.109589		73
15	or83b2	SCAM 139 h	SC + Am	L	10:00:00	2	15	34	31	0.0447761	34	31	0.0447761		67
16	or83b2	SCAM 139 h	SC + Am	R	10:05:00	1	16	40	26	0.208955	26	40	-0.208955		67
17	or83b2	SCAM 139 h	SC + Am	L	10:10:00	2	17	35	10	0.531915	35	10	0.531915		47
18	or83b2	SCAM 139 h	SC + Am	R	10:15:00		18			#DIV/0!	0	0	#DIV/0!		0
19	or35a	SCAM 139 h	SC + Am	L	10:40:00	4	19	39	20	0.301587	39	20	0.301587	0.0685767	63	43
20	or35a	SCAM 139 h	SC + Am	R	10:45:00	4	20	28	36	-0.117647	36	28	0.117647		68
21	or35a	SCAM 139 h	SC + Am	L	10:50:00	2	21	28	28	0	28	28	0		58
22	or35a	SCAM 139 h	SC + Am	R	10:55:00	3	22	38	28	0.144928	28	38	-0.144928		69
23	or35a	SCAM 139 h	SC + Am	L	11:00:00		23			#DIV/0!	0	0	#DIV/0!		0
24	or35a	SCAM 139 h	SC + Am	R	11:05:00		24			#DIV/0!	0	0	#DIV/0!		0
25	or42b	SCAM 139 h	SC + Am	L	11:30:00	9	25	44	22	0.293333	44	22	0.293333	0.0610204	75	66.6667
26	or42b	SCAM 139 h	SC + Am	R	11:35:00	2	26	29	26	0.0526316	26	29	-0.0526316		57
27	or42b	SCAM 139 h	SC + Am	L	11:40:00	4	27	42	15	0.442623	42	15	0.442623		61
28	or42b	SCAM 139 h	SC + Am	R	11:45:00	5	28	41	28	0.175676	28	41	-0.175676		74
29	or42b	SCAM 139 h	SC + Am	L	11:50:00	9	29	38	24	0.197183	38	24	0.197183		71
30	or42b	SCAM 139 h	SC + Am	R	11:55:00	5	30	39	18	0.33871	18	39	-0.33871		62

## Sheet: Exp8
Experiment #	Fly Strain	Test Arm	Control Arm	Test Side	Time_Experiment	Center Flies	Experiment #	Left side	right side	Left Side RI	Test Arm	Control Arm	Test Arm RI		Total Flies
1	Canton-S (CR)	Mock	Mock	L	08:20:00	7	1	25	16	0.1875	25	16	0.1875	-0.0712021	48	60
2	Canton-S (CR)	Mock	Mock	R	08:25:00	8	2	25	16	0.183673	16	25	-0.183673		49
3	Canton-S (CR)	Mock	Mock	L	08:30:00	9	3	23	35	-0.179104	23	35	-0.179104		67
4	Canton-S (CR)	Mock	Mock	R	08:35:00	4	4	33	28	0.0769231	28	33	-0.0769231		65
5	Canton-S (CR)	Mock	Mock	L	08:40:00	9	5	23	26	-0.0517241	23	26	-0.0517241		58
6	Canton-S (CR)	Mock	Mock	R	08:45:00	10	6	36	27	0.123288	27	36	-0.123288		73
7	Canton-S (CR)	SCAM 163 h	SC + Am	L	09:00:00	3	7	48	20	0.394366	48	20	0.394366	0.16022	71	71
8	Canton-S (CR)	SCAM 163 h	SC + Am	R	09:05:00	3	8	39	46	-0.0795455	46	39	0.0795455		88
9	Canton-S (CR)	SCAM 163 h	SC + Am	L	09:10:00	3	9	44	28	0.213333	44	28	0.213333		75
10	Canton-S (CR)	SCAM 163 h	SC + Am	R	09:15:00	1	10	33	28	0.0806452	28	33	-0.0806452		62
11	Canton-S (CR)	SCAM 163 h	SC + Am	L	09:20:00	2	11	38	17	0.368421	38	17	0.368421		57
12	Canton-S (CR)	SCAM 163 h	SC + Am	R	09:25:00	4	12	35	34	0.0136986	34	35	-0.0136986		73
13	Or83b2	SCAM 163 h	SC + Am	L	09:50:00	3	13	35	14	0.403846	35	14	0.403846	0.208815	52	60.5
14	or83b2	SCAM 163 h	SC + Am	R	09:55:00	4	14	25	34	-0.142857	34	25	0.142857		63
15	or83b2	SCAM 163 h	SC + Am	L	10:00:00	2	15	34	27	0.111111	34	27	0.111111		63
16	or83b2	SCAM 163 h	SC + Am	R	10:05:00	3	16	23	38	-0.234375	38	23	0.234375		64
17	or83b2	SCAM 163 h	SC + Am	L	10:10:00	2	17	38	18	0.344828	38	18	0.344828		58
18	or83b2	SCAM 163 h	SC + Am	R	10:15:00	0	18	31	32	-0.015873	32	31	0.015873		63
19	or35a	SCAM 163 h	SC + Am	L	10:40:00	5	19	15	30	-0.3	15	30	-0.3	-0.017157	50	67.3333
20	or35a	SCAM 163 h	SC + Am	R	10:45:00	4	20	34	38	-0.0526316	38	34	0.0526316		76
21	or35a	SCAM 163 h	SC + Am	L	10:50:00	6	21	38	29	0.123288	38	29	0.123288		73
22	or35a	SCAM 163 h	SC + Am	R	10:55:00	5	22	30	27	0.0483871	27	30	-0.0483871		62
23	or35a	SCAM 163 h	SC + Am	L	11:00:00	9	23	31	29	0.0289855	31	29	0.0289855		69
24	or35a	SCAM 163 h	SC + Am	R	11:05:00	11	24	30	33	-0.0405405	33	30	0.0405405		74
25	or42b	SCAM 163 h	SC + Am	L	11:30:00	8	25	43	21	0.305556	43	21	0.305556	0.188558	72	57.1667
26	or42b	SCAM 163 h	SC + Am	R	11:35:00	5	26			0	0	0	0		5
27	or42b	SCAM 163 h	SC + Am	L	11:40:00	6	27	46	22	0.324324	46	22	0.324324		74
28	or42b	SCAM 163 h	SC + Am	R	11:45:00	5	28	28	28	0	28	28	0		61
29	or42b	SCAM 163 h	SC + Am	L	11:50:00	7	29	38	15	0.383333	38	15	0.383333		60
30	or42b	SCAM 163 h	SC + Am	R	11:55:00	2	30	37	32	0.0704225	32	37	-0.0704225		71

## Sheet: Exp9
Experiment #	Fly Strain	Test Arm	Control Arm	Test Side	Time_Experiment	Center Flies	Experiment #	Left side	right side	Left Side RI	Test Arm	Control Arm	Test Arm RI		Total Flies
1	Canton-S (CR)	Mock	Mock	L	08:20:00	6	1	55	35	0.208333	55	35	0.208333	-0.0035984	96	78.3333
2	Canton-S (CR)	Mock	Mock	R	08:25:00	1	2	40	20	0.327869	20	40	-0.327869		61
3	Canton-S (CR)	Mock	Mock	L	08:30:00	6	3	40	30	0.131579	40	30	0.131579		76
4	Canton-S (CR)	Mock	Mock	R	08:35:00	3	4	43	35	0.0987654	35	43	-0.0987654		81
5	Canton-S (CR)	Mock	Mock	L	08:40:00	0	5	40	36	0.0526316	40	36	0.0526316		76
6	Canton-S (CR)	Mock	Mock	R	08:45:00	3	6	38	39	-0.0125	39	38	0.0125		80
7	Canton-S (CR)	SCAM 67 h	SC + Am	L	09:10:00	2	7	45	20	0.373134	45	20	0.373134	0.426544	67	75.6667
8	Canton-S (CR)	SCAM 67 h	SC + Am	R	09:15:00	2	8	20	53	-0.44	53	20	0.44		75
9	Canton-S (CR)	SCAM 67 h	SC + Am	L	09:20:00	1	9	55	20	0.460526	55	20	0.460526		76
10	Canton-S (CR)	SCAM 67 h	SC + Am	R	09:25:00	3	10	27	47	-0.25974	47	27	0.25974		77
11	Canton-S (CR)	SCAM 67 h	SC + Am	L	09:30:00	0	11	70	17	0.609195	70	17	0.609195		87
12	Canton-S (CR)	SCAM 67 h	SC + Am	R	09:35:00	0	12	21	51	-0.416667	51	21	0.416667		72
13	Or83b2	SCAM 67 h	SC + Am	L	10:00:00	2	13	37	21	0.266667	37	21	0.266667	0.165698	60	71.2
14	or83b2	SCAM 67 h	SC + Am	R	10:05:00	4	14	31	44	-0.164557	44	31	0.164557		79
15	or83b2	SCAM 67 h	SC + Am	L	10:10:00	4	15	43	29	0.184211	43	29	0.184211		76
16	or83b2	SCAM 67 h	SC + Am	R	10:15:00	2	16	31	31	0	31	31	0		64
17	or83b2	SCAM 67 h	SC + Am	L	10:20:00	1	17	35	25	0.163934	35	25	0.163934		61
18	or83b2	SCAM 67 h	SC + Am	R	10:25:00	2	18	25	49	-0.315789	49	25	0.315789		76
19	or35a	SCAM 67 h	SC + Am	L	10:50:00	2	19	46	29	0.220779	46	29	0.220779	0.337054	77	78.8333
20	or35a	SCAM 67 h	SC + Am	R	10:55:00	2	20	25	48	-0.306667	48	25	0.306667		75
21	or35a	SCAM 67 h	SC + Am	L	11:00:00	4	21	62	27	0.376344	62	27	0.376344		93
22	or35a	SCAM 67 h	SC + Am	R	11:05:00	4	22	25	53	-0.341463	53	25	0.341463		82
23	or35a	SCAM 67 h	SC + Am	L	11:10:00	3	23	53	20	0.434211	53	20	0.434211		76
24	or35a	SCAM 67 h	SC + Am	R	11:15:00	0	24	23	47	-0.342857	47	23	0.342857		70
25	or42b	SCAM 67 h	SC + Am	L	11:40:00		25			#DIV/0!	0	0	#DIV/0!	0.157127	0	64.6667
26	or42b	SCAM 67 h	SC + Am	R	11:45:00	8	26	25	43	-0.236842	43	25	0.236842		76
27	or42b	SCAM 67 h	SC + Am	L	11:50:00	3	27	45	24	0.291667	45	24	0.291667		72
28	or42b	SCAM 67 h	SC + Am	R	11:55:00	5	28	31	45	-0.17284	45	31	0.17284		81
29	or42b	SCAM 67 h	SC + Am	L	12:00:00	6	29	39	30	0.12	39	30	0.12		75
30	or42b	SCAM 67 h	SC + Am	R	12:05:00	5	30	41	38	0.0357143	38	41	-0.0357143		84
31	Ir8a	SCAM 67 h	SC + Am	L	12:30:00	6	31	65	21	0.478261	65	21	0.478261	0.491635	92	85.8333
32	Ir8a	SCAM 67 h	SC + Am	R	12:35:00	1	32	24	63	-0.443182	63	24	0.443182		88
33	Ir8a	SCAM 67 h	SC + Am	L	12:40:00	4	33	62	17	0.542169	62	17	0.542169		83
34	Ir8a	SCAM 67 h	SC + Am	R	12:45:00	1	34	22	72	-0.526316	72	22	0.526316		95
35	Ir8a	SCAM 67 h	SC + Am	L	12:50:00	0	35	57	27	0.357143	57	27	0.357143		84
36	Ir8a	SCAM 67 h	SC + Am	R	12:55:00	1	36	14	58	-0.60274	58	14	0.60274		73
37	Ir76b	SCAM 67 h	SC + Am	L	13:20:00	7	37	53	17	0.467532	53	17	0.467532	0.483663	77	79.3333
38	Ir76b	SCAM 67 h	SC + Am	R	13:25:00	4	38	14	60	-0.589744	60	14	0.589744		78
39	Ir76b	SCAM 67 h	SC + Am	L	13:30:00	3	39	65	17	0.564706	65	17	0.564706		85
40	Ir76b	SCAM 67 h	SC + Am	R	13:35:00	3	40	25	56	-0.369048	56	25	0.369048		84
41	Ir76b	SCAM 67 h	SC + Am	L	13:40:00	3	41	53	22	0.397436	53	22	0.397436		78
42	Ir76b	SCAM 67 h	SC + Am	R	13:45:00	0	42	18	56	-0.513514	56	18	0.513514		74
43	Ir25a	SCAM 67 h	SC + Am	L	14:10:00	7	43	79	11	0.701031	79	11	0.701031	0.60951	97	78.5
44	Ir25a	SCAM 67 h	SC + Am	R	14:15:00	5	44	11	69	-0.682353	69	11	0.682353		85
45	Ir25a	SCAM 67 h	SC + Am	L	14:20:00	4	45	62	13	0.620253	62	13	0.620253		79
46	Ir25a	SCAM 67 h	SC + Am	R	14:25:00	2	46	9	46	-0.649123	46	9	0.649123		57
47	Ir25a	SCAM 67 h	SC + Am	L	14:30:00	1	47	57	12	0.642857	57	12	0.642857		70
48	Ir25a	SCAM 67 h	SC + Am	R	14:35:00	9	48	22	52	-0.361446	52	22	0.361446		83

[truncated: 9 more sheets: Exp10, Exp11, Exp12, Exp13, Exp14, Exp15, Exp16, Exp17, Exp18]
