# Supplementary material for: Metabolite exchange between microbiome members produces compounds that influence Drosophila behavior
Source: eLife. 2017 Jan 9;6:e18855. doi: 10.7554/eLife.18855 (PMC5222558; doi:10.7554/eLife.18855)
Supplement: Figure 3—source data 2. — DOI: http://dx.doi.org/10.7554/eLife.18855.016 [file elife-18855-fig3-data2.xlsx]

## Sheet: FrOct7
Experiment #	Fly Strain	Test Arm	Control Arm	Test Side	Time_Experiment	Center Flies	Experiment #	Left side	right side	Left Side RI	Test Arm	Control Arm	Test Arm RI		# Flies	Average
1	Canton-S (CR)	Mock	Mock	L	08:00:00	4	1	41	24	0.246377	41	24	0.246377	-0.0125946	69	68.1667
2	Canton-S (CR)	Mock	Mock	R	08:05:00	0	2	45	36	0.111111	36	45	-0.111111		81
3	Canton-S (CR)	Mock	Mock	L	08:10:00	6	3	35	25	0.151515	35	25	0.151515		66
4	Canton-S (CR)	Mock	Mock	R	08:15:00	3	4	31	31	0	31	31	0		65
5	Canton-S (CR)	Mock	Mock	L	08:20:00	6	5	30	40	-0.131579	30	40	-0.131579		76
6	Canton-S (CR)	Mock	Mock	R	08:25:00	4	6	30	18	0.230769	18	30	-0.230769		52
7	Canton-S (CR)	SCAM67	SC + Am 67	L	08:50:00	0	7	48	21	0.391304	48	21	0.391304	0.339552	69	64.5
8	Canton-S (CR)	SCAM67	SC + Am 67	R	08:55:00	2	8	20	48	-0.4	48	20	0.4		70
9	Canton-S (CR)	SCAM67	SC + Am 67	L	09:00:00	1	9	48	12	0.590164	48	12	0.590164		61
10	Canton-S (CR)	SCAM67	SC + Am 67	R	09:05:00	0	10	20	24	-0.0909091	24	20	0.0909091		44
11	Canton-S (CR)	SCAM67	SC + Am 67	L	09:10:00	1	11	46	19	0.409091	46	19	0.409091		66
12	Canton-S (CR)	SCAM67	SC + Am 67	R	09:15:00	1	12	32	44	-0.155844	44	32	0.155844		77
13	42b/+	SCAM67	SC + Am 67	L	09:40:00	0	13	47	11	0.62069	47	11	0.62069	0.404456	58	59.6667
14	42b/+	SCAM67	SC + Am 67	R	09:45:00	1	14	16	43	-0.45	43	16	0.45		60
15	42b/+	SCAM67	SC + Am 67	L	09:50:00	0	15	47	25	0.305556	47	25	0.305556		72
16	42b/+	SCAM67	SC + Am 67	R	09:55:00	1	16	9	30	-0.525	30	9	0.525		40
17	42b/+	SCAM67	SC + Am 67	L	10:00:00	0	17	44	16	0.466667	44	16	0.466667		60
18	42b/+	SCAM67	SC + Am 67	R	10:05:00	0	18	32	36	-0.0588235	36	32	0.0588235		68
19	orco2/+	SCAM67	SC + Am 67	L	10:30:00	0	19	44	9	0.660377	44	9	0.660377	0.41718	53	65.3333
20	orco2/+	SCAM67	SC + Am 67	R	10:35:00	1	20	26	35	-0.145161	35	26	0.145161		62
21	orco2/+	SCAM67	SC + Am 67	L	10:40:00	0	21	53	23	0.394737	53	23	0.394737		76
22	orco2/+	SCAM67	SC + Am 67	R	10:45:00	3	22	13	63	-0.632911	63	13	0.632911		79
23	orco2/+	SCAM67	SC + Am 67	L	10:50:00	0	23	38	22	0.266667	38	22	0.266667		60
24	orco2/+	SCAM67	SC + Am 67	R	10:55:00	1	24	18	43	-0.403226	43	18	0.403226		62
25	orco1	SCAM67	SC + Am 67	L	11:20:00	6	25	38	17	0.344262	38	17	0.344262	0.172922	61	58.3333
26	orco1	SCAM67	SC + Am 67	R	11:25:00	7	26	21	34	-0.209677	34	21	0.209677		62
27	orco1	SCAM67	SC + Am 67	L	11:30:00	8	27	40	22	0.257143	40	22	0.257143		70
28	orco1	SCAM67	SC + Am 67	R	11:35:00	3	28	22	21	0.0217391	21	22	-0.0217391		46
29	orco1	SCAM67	SC + Am 67	L	11:40:00	6	29	26	17	0.183673	26	17	0.183673		49
30	orco1	SCAM67	SC + Am 67	R	11:45:00	6	30	26	30	-0.0645161	30	26	0.0645161		62

## Sheet: MonOct10th
Experiment #	Fly Strain	Test Arm	Control Arm	Test Side	Time_Experiment	Center Flies	Experiment #	Left side	right side	Left Side RI	Test Arm	Control Arm	Test Arm RI		# Flies	Average
1	Canton-S (CR)	Mock	Mock	L	08:00:00	4	1	35	29	0.0882353	35	29	0.0882353	-0.0131976	68	67.3333
2	Canton-S (CR)	Mock	Mock	R	08:05:00	3	2	34	36	-0.0273973	36	34	0.0273973		73
3	Canton-S (CR)	Mock	Mock	L	08:10:00	3	3	24	26	-0.0377358	24	26	-0.0377358		53
4	Canton-S (CR)	Mock	Mock	R	08:15:00	4	4	33	20	0.22807	20	33	-0.22807		57
5	Canton-S (CR)	Mock	Mock	L	08:20:00	2	5	38	32	0.0833333	38	32	0.0833333		72
6	Canton-S (CR)	Mock	Mock	R	08:25:00	4	6	39	38	0.0123457	38	39	-0.0123457		81
7	orco2/+	SCAM67	SC + Am 67	L	08:50:00	3	7	45	38	0.0813953	45	38	0.0813953	0.285201	86	64
8	orco2/+	SCAM67	SC + Am 67	R	08:55:00	1	8	25	37	-0.190476	37	25	0.190476		63
9	orco2/+	SCAM67	SC + Am 67	L	09:00:00	0	9	51	17	0.5	51	17	0.5		68
10	orco2/+	SCAM67	SC + Am 67	R	09:05:00	1	10	36	52	-0.179775	52	36	0.179775		89
11	orco2/+	SCAM67	SC + Am 67	L	09:10:00	1	11	57	20	0.474359	57	20	0.474359		78
12	orco2/+	SCAM67	SC + Am 67	R	09:15:00		12			#DIV/0!	0	0	#DIV/0!		0
13	Canton-S (CR)	SCAM67	SC + Am 67	L	09:40:00	0	13	34	8	0.619048	34	8	0.619048	0.397163	42	60.3333
14	Canton-S (CR)	SCAM67	SC + Am 67	R	09:45:00	1	14	25	39	-0.215385	39	25	0.215385		65
15	Canton-S (CR)	SCAM67	SC + Am 67	L	09:50:00	1	15	49	20	0.414286	49	20	0.414286		70
16	Canton-S (CR)	SCAM67	SC + Am 67	R	09:55:00	1	16	23	46	-0.328571	46	23	0.328571		70
17	Canton-S (CR)	SCAM67	SC + Am 67	L	10:00:00	2	17	47	10	0.627119	47	10	0.627119		59
18	Canton-S (CR)	SCAM67	SC + Am 67	R	10:05:00	2	18	22	32	-0.178571	32	22	0.178571		56
19	42b/+	SCAM67	SC + Am 67	L	10:30:00	4	19	46	16	0.454545	46	16	0.454545	0.294774	66	65.6667
20	42b/+	SCAM67	SC + Am 67	R	10:35:00	3	20	20	38	-0.295082	38	20	0.295082		61
21	42b/+	SCAM67	SC + Am 67	L	10:40:00	0	21	41	24	0.261538	41	24	0.261538		65
22	42b/+	SCAM67	SC + Am 67	R	10:45:00	0	22	26	41	-0.223881	41	26	0.223881		67
23	42b/+	SCAM67	SC + Am 67	L	10:50:00	0	23	42	24	0.272727	42	24	0.272727		66
24	42b/+	SCAM67	SC + Am 67	R	10:55:00	1	24	25	43	-0.26087	43	25	0.26087		69
25	orco1	SCAM67	SC + Am 67	L	#REF!	8	#REF!	26	17	0.176471	26	17	0.176471	0.115285	51	62.1667
26	orco1	SCAM67	SC + Am 67	R	#REF!	5	#REF!	26	39	-0.185714	39	26	0.185714		70
27	orco1	SCAM67	SC + Am 67	L	#REF!	6	#REF!	30	33	-0.0434783	30	33	-0.0434783		69
28	orco1	SCAM67	SC + Am 67	R	#REF!	7	#REF!	20	26	-0.113208	26	20	0.113208		53
29	orco1	SCAM67	SC + Am 67	L	#REF!	5	#REF!	39	29	0.136986	39	29	0.136986		73
30	orco1	SCAM67	SC + Am 67	R	#REF!	6	#REF!	22	29	-0.122807	29	22	0.122807		57
