# Supplementary material for: Metabolite exchange between microbiome members produces compounds that influence Drosophila behavior
Source: eLife. 2017 Jan 9;6:e18855. doi: 10.7554/eLife.18855 (PMC5222558; doi:10.7554/eLife.18855)
Supplement: Figure 4—figure supplement 1—source data 1. — DOI: http://dx.doi.org/10.7554/eLife.18855.028 [file elife-18855-fig4-figsupp1-data1.xlsx]

## Sheet: Exp1
Experiment #	Fly Strain	Test Arm	Control Arm	Test Side	Time_Experiment	Center flies	Experiment #	Left Arm	Right Arm	Left Side RI	Test Arm	Control Arm	Test Arm RI
1	Canton-S (CR)	Mock	Mock	L	11:00:00	9	1	34	24	0.149254	34	24	0.149254	0.0382458
2	Canton-S (CR)	Mock	Mock	R	11:05:00	8	2	21	29	-0.137931	29	21	0.137931
3	Canton-S (CR)	Mock	Mock	L	11:10:00	12	3	29	22	0.111111	29	22	0.111111
4	Canton-S (CR)	Mock	Mock	R	11:15:00	9	4	37	22	0.220588	22	37	-0.220588
5	Canton-S (CR)	Mock	Mock	L	11:20:00	11	5	30	24	0.0923077	30	24	0.0923077
6	Canton-S (CR)	Mock	Mock	R	11:25:00	15	6	31	28	0.0405405	28	31	-0.0405405
7	Canton-S (CR)	ScAm 72 h	AJM	L	11:20:00	4	7	51	14	0.536232	51	14	0.536232	0.577473
8	Canton-S (CR)	ScAm 72 h	AJM	R	11:25:00	7	8	11	53	-0.591549	53	11	0.591549
9	Canton-S (CR)	ScAm 72 h	AJM	L	11:30:00	6	9	41	4	0.72549	41	4	0.72549
10	Canton-S (CR)	ScAm 72 h	AJM	R	11:30:00	4	10	11	55	-0.628571	55	11	0.628571
11	Canton-S (CR)	ScAm 72 h	AJM	L	11:35:00	7	11	43	17	0.38806	43	17	0.38806
12	Canton-S (CR)	ScAm 72 h	AJM	R	11:35:00	6	12	13	60	-0.594937	60	13	0.594937
13	Canton-S (CR)	ScAp 72 h	AJM	L	12:05:00	4	13	57	1	0.903226	57	1	0.903226	0.67099
14	Canton-S (CR)	ScAp 72 h	AJM	R	11:40:00	4	14	10	56	-0.657143	56	10	0.657143
15	Canton-S (CR)	ScAp 72 h	AJM	L	12:10:00	3	15	64	7	0.77027	64	7	0.77027
16	Canton-S (CR)	ScAp 72 h	AJM	R	11:45:00	7	16	11	32	-0.42	32	11	0.42
17	Canton-S (CR)	ScAp 72 h	AJM	L	12:15:00	4	17	49	9	0.645161	49	9	0.645161
18	Canton-S (CR)	ScAp 72 h	AJM	R	12:20:00	3	18	12	58	-0.630137	58	12	0.630137

## Sheet: Exp2
Experiment #	Fly Strain	Test Arm	Control Arm	Test Side	Time_Experiment	Center flies	Experiment #	Left Arm	Right Arm	Left Side RI	Test Arm	Control Arm	Test Arm RI
1	Canton-S (CR)	Mock	Mock	L	08:00:00	8	1	29	28	0.0153846	29	28	0.0153846	-0.0143671
2	Canton-S (CR)	Mock	Mock	R	08:05:00	10	2	30	28	0.0294118	28	30	-0.0294118
3	Canton-S (CR)	Mock	Mock	L	08:10:00	13	3	29	29	0	29	29	0
4	Canton-S (CR)	Mock	Mock	R	08:15:00	10	4	24	17	0.137255	17	24	-0.137255
5	Canton-S (CR)	Mock	Mock	L	08:20:00	15	5	32	23	0.128571	32	23	0.128571
6	Canton-S (CR)	Mock	Mock	R	08:25:00	11	6	28	24	0.0634921	24	28	-0.0634921
7	Canton-S (CR)	ScAM WT 72 h	AJM	L	08:30:00	3	7	52	10	0.646154	52	10	0.646154	0.574555
8	Canton-S (CR)	ScAM WT 72 h	AJM	R	08:35:00	3	8	15	52	-0.528571	52	15	0.528571
9	Canton-S (CR)	ScAM WT 72 h	AJM	L	08:40:00	11	9	44	10	0.523077	44	10	0.523077
10	Canton-S (CR)	ScAM WT 72 h	AJM	R	08:45:00	5	10	9	54	-0.661765	54	9	0.661765
11	Canton-S (CR)	ScAM WT 72 h	AJM	L	08:50:00	7	11	38	9	0.537037	38	9	0.537037
12	Canton-S (CR)	ScAM WT 72 h	AJM	R	08:55:00	9	12	11	49	-0.550725	49	11	0.550725
13	Canton-S (CR)	ScAP WT 72h	AJM	L	12:00:00	13	13	58	12	0.554217	58	12	0.554217	0.508703
14	Canton-S (CR)	ScAP WT 72h	AJM	R	12:05:00	5	14	19	59	-0.481928	59	19	0.481928
15	Canton-S (CR)	ScAP WT 72h	AJM	L	12:10:00	7	15	29	6	0.547619	29	6	0.547619
16	Canton-S (CR)	ScAP WT 72h	AJM	R	12:15:00	8	16	13	45	-0.484848	45	13	0.484848
17	Canton-S (CR)	ScAP WT 72h	AJM	L	12:20:00	5	17	42	14	0.459016	42	14	0.459016
18	Canton-S (CR)	ScAP WT 72h	AJM	R	12:25:00	5	18	12	44	-0.52459	44	12	0.52459
