# Supplementary material for: Metabolite exchange between microbiome members produces compounds that influence Drosophila behavior
Source: eLife. 2017 Jan 9;6:e18855. doi: 10.7554/eLife.18855 (PMC5222558; doi:10.7554/eLife.18855)
Supplement: Figure 4—source data 1. — DOI: http://dx.doi.org/10.7554/eLife.18855.024 [file elife-18855-fig4-data1.xlsx]

## Sheet: AA_ETOH_timecourse
Experiment 1 (6/16/15)	#AA= acetic acid	#ETOH = ethanol
	Ion abundance of characteristic mz_retention time pair
AA_3%	7147008
AA_0.3%	85584
AA_0.03%	17528
AA lin reg equation (from prism)	Y = 2.488e+006*X - 344526
ETOH_3%	2606080
ETOH_0.3%	311872
ETOH_0.03%	14931
ETOH lin reg equation (from prism)	Y = 863224*X + 19449
T24	Rep 1	Rep 2	Rep 3	AVERAGE	Concentration (%, based on lin regression)
5.9_45.1	877312	319616	1302016	832981	0.942435
6.27_60.05	0	13084	6769	6617.67	0.141135
T36
5.9_45.1	8388096	7745024	6965248	7699456	8.89689
6.27_60.05	251968	301440	359104	304171	0.26073
T48
5.9_45.1	7372800	6005248	6500864	6626304	7.6537
6.27_60.05	1367552	3149312	878592	1.79849e+06	0.861339
T60
5.9_45.1	1976832	1267712	3576320	2.27362e+06	2.61134
6.27_60.05	4168192	8388096	3942912	5.49973e+06	2.34898
T72
5.9_45.1	978688	1091584	1598464	1222912	1.39415
6.27_60.05	8007680	6606336	6293504	6.96917e+06	2.93959
T84
5.9_45.1	1419264	1560064	1541120	1506816	1.72304
6.27_60.05	6740992	8388096	7203840	7.44431e+06	3.13056
T96
5.9_45.1	829312	800576	415296	681728	0.767216
6.27_60.05	8275968	7177216	4910592	6.78793e+06	2.86674
Experiment 2 (6/26/15)
T24	Rep 1	Rep 2	Rep 3	AVERAGE	Concentration (%, based on lin regression)
5.9_45.1	791552	453760	327232	524181	0.467812
6.27_60.05	0	8630	10994	6541.33	0.132443
T36
5.9_45.1	4405248	3941376	2341376	3.56267e+06	3.73424
6.27_60.05	22664	66264	87672	58866.7	0.168184
T48
5.9_45.1	5971456	5497856	8332288	6.60053e+06	7
6.27_60.05	508672	580672	832320	640555	0.565512
T60
5.9_45.1	2307072	3150848	3264512	2.90748e+06	3.0299
6.27_60.05	1477632	2993152	2939392	2.47006e+06	1.81517
T72
5.9_45.1	1498624	1245696	875072	1206464	1.20128
6.27_60.05	3083264	4144128	3516928	3581440	2.57431
T84
5.9_45.1	1140224	1385984	883584	1.1366e+06	1.12617
6.27_60.05	4140032	4914688	4279808	4.44484e+06	3.16407
T96
5.9_45.1	2015232	1276928	1123840	1472000	1.48673
6.27_60.05	3710976	3107328	3277824	3365376	2.42673
T144
5.9_45.1	362048	548608	453120	454592	0.393002
6.27_60.05	4054016	3748864	3975680	3.92619e+06	2.8098
T156
5.9_45.1	193472	182912	225984	200789	0.120159
6.27_60.05	4951040	5876224	3629568	4818944	3.4196
STANDARDS
AA_3%	4675072	2568192	5418496
AA_0.3%	72424	101152	98160
AA_0.03%	3754	3370	2771
Lin regression	Y = 1.464e+006*X - 187355
ETOH_3%	4055040	551232	4035584
ETOH_0.3%	265792	415168	391872
ETOH_0.03%	105824	176384	97112
	Y = 930217*X + 89015
