# Supplementary material for: Metabolite exchange between microbiome members produces compounds that influence Drosophila behavior
Source: eLife. 2017 Jan 9;6:e18855. doi: 10.7554/eLife.18855 (PMC5222558; doi:10.7554/eLife.18855)
Supplement: Figure 4—source data 2. — DOI: http://dx.doi.org/10.7554/eLife.18855.025 [file elife-18855-fig4-data2.xlsx]

## Sheet: Exp1
Experiment #	Fly Strain	Test Arm	Control Arm	Test Side	Time_Experiment	Center Flies	Experiment #	Left Arm	Right Arm	Left Side RI	Test Arm	Control Arm	Test Arm RI
1	Canton-S (CR)	Mock	Mock	L	11:00:00	9	1	21	19	0.0408163	21	19	0.0408163	-0.0464988
2	Canton-S (CR)	Mock	Mock	R	11:05:00	5	2	17	18	-0.025	18	17	0.025
3	Canton-S (CR)	Mock	Mock	L	11:10:00	12	3	16	18	-0.0434783	16	18	-0.0434783
4	Canton-S (CR)	Mock	Mock	R	11:15:00	8	4	25	15	0.208333	15	25	-0.208333
5	Canton-S (CR)	ScAm 72 h (first tp without viable Sc) v ScAm 36	Mock	L	11:20:00	4	5	38	9	0.568627	38	9	0.568627	0.460996
6	Canton-S (CR)	ScAm 72 h (first tp without viable Sc) v ScAm 36	Mock	R	11:25:00	4	6	12	34	-0.44	34	12	0.44
7	Canton-S (CR)	ScAm 72 h (first tp without viable Sc) v ScAm 36	Mock	L	11:30:00	4	7	28	6	0.578947	28	6	0.578947
8	Canton-S (CR)	ScAm 72 h (first tp without viable Sc) v ScAm 36	Mock	R	11:35:00	3	8	13	23	-0.25641	23	13	0.25641
9	Canton-S (CR)	ScAm 72 h (first tp without viable Sc) v ScAm 144	Mock	L	12:05:00	6	9	24	21	0.0588235	24	21	0.0588235	0.225813
10	Canton-S (CR)	ScAm 72 h (first tp without viable Sc) v ScAm 144	Mock	R	12:10:00	4	10	17	35	-0.321429	35	17	0.321429
11	Canton-S (CR)	ScAm 72 h (first tp without viable Sc) v ScAm 144	Mock	L	12:15:00	5	11	32	15	0.326923	32	15	0.326923
12	Canton-S (CR)	ScAm 72 h (first tp without viable Sc) v ScAm 144	Mock	R	12:20:00	3	12	19	29	-0.196078	29	19	0.196078
13	Canton-S (CR)	ScAm 72 h (first tp without viable Sc) v AJM	Mock	L	12:25:00	7	13	54	8	0.666667	54	8	0.666667	0.596491
14	Canton-S (CR)	ScAm 72 h (first tp without viable Sc) v AJM	Mock	R	12:30:00	4	14	14	39	-0.438596	39	14	0.438596
15	Canton-S (CR)	ScAm 72 h (first tp without viable Sc) v AJM	Mock	L	12:35:00	2	15	47	8	0.684211	47	8	0.684211

## Sheet: Exper2
Experiment #	Fly Strain	Test Arm	Control Arm	Test Side	Time_Experiment	Center flies	Experiment #	Left Arm	Right Arm	Left Side RI	Test Arm	Control Arm	Test Arm RI
1	Canton-S (CR)	Mock	Mock	L	11:00:00	5	1	26	24	0.0363636	26	24	0.0363636	-0.0172395
2	Canton-S (CR)	Mock	Mock	R	11:05:00	6	2	22	16	0.136364	16	22	-0.136364
3	Canton-S (CR)	Mock	Mock	L	11:10:00	10	3	18	13	0.121951	18	13	0.121951
4	Canton-S (CR)	Mock	Mock	R	11:15:00	4	4	22	18	0.0909091	18	22	-0.0909091
5	Canton-S (CR)	Mock	Mock	L	11:20:00					#DIV/0!
6	Canton-S (CR)	Mock	Mock	R	11:25:00		1			#DIV/0!	0	0	#DIV/0!
7	Canton-S (CR)	ScAm 72 h (first tp without viable Sc) v AJM	Mock	L	11:50:00	3	5	51	13	0.567164	51	13	0.567164	0.594098
8	Canton-S (CR)	ScAm 72 h (first tp without viable Sc) v AJM	Mock	R	11:55:00	3	6	13	34	-0.42	34	13	0.42
9	Canton-S (CR)	ScAm 72 h (first tp without viable Sc) v AJM	Mock	L	12:00:00	1	7	45	4	0.82	45	4	0.82
10	Canton-S (CR)	ScAm 72 h (first tp without viable Sc) v AJM	Mock	R	12:05:00	0	7	4	42	-0.826087	42	4	0.826087
11	Canton-S (CR)	ScAm 72 h (first tp without viable Sc) v AJM	Mock	L	12:10:00	3	8	30	14	0.340426	30	14	0.340426
12	Canton-S (CR)	ScAm 72 h (first tp without viable Sc) v AJM	Mock	R	12:15:00	5	8	11	50	-0.590909	50	11	0.590909
13	Canton-S (CR)	ScAm 72 h (first tp without viable Sc) v ScAm 144	Mock	L	12:40:00	2	9	45	15	0.483871	45	15	0.483871	0.293027
14	Canton-S (CR)	ScAm 72 h (first tp without viable Sc) v ScAm 144	Mock	R	12:45:00	2	9	13	30	-0.377778	30	13	0.377778
15	Canton-S (CR)	ScAm 72 h (first tp without viable Sc) v ScAm 144	Mock	L	12:50:00	3	10	36	18	0.315789	36	18	0.315789
16	Canton-S (CR)	ScAm 72 h (first tp without viable Sc) v ScAm 144	Mock	R	12:55:00	4	10	16	32	-0.307692	32	16	0.307692
17	Canton-S (CR)	ScAm 72 h (first tp without viable Sc) v ScAm 144	Mock	L	13:00:00	9	11	27	15	0.235294	27	15	0.235294
18	Canton-S (CR)	ScAm 72 h (first tp without viable Sc) v ScAm 144	Mock	R	13:05:00	3	12	24	26	-0.0377358	26	24	0.0377358
19	Canton-S (CR)	ScAm 72 h (first tp without viable Sc) v ScAm 36	Mock	L	13:30:00	3	13	36	4	0.744186	36	4	0.744186	0.509308
20	Canton-S (CR)	ScAm 72 h (first tp without viable Sc) v ScAm 36	Mock	R	13:35:00	5	14	14	42	-0.459016	42	14	0.459016
21	Canton-S (CR)	ScAm 72 h (first tp without viable Sc) v ScAm 36	Mock	L	13:40:00	3	15	39	10	0.557692	39	10	0.557692
22	Canton-S (CR)	ScAm 72 h (first tp without viable Sc) v ScAm 36	Mock	R	13:45:00	6	16	19	33	-0.241379	33	19	0.241379
23	Canton-S (CR)	ScAm 72 h (first tp without viable Sc) v ScAm 36	Mock	L	13:50:00	7	15	40	11	0.5	40	11	0.5
24	Canton-S (CR)	ScAm 72 h (first tp without viable Sc) v ScAm 36	Mock	R	13:55:00	1	16	12	43	-0.553571	43	12	0.553571
