# Supplementary material for: Metabolite exchange between microbiome members produces compounds that influence Drosophila behavior
Source: eLife. 2017 Jan 9;6:e18855. doi: 10.7554/eLife.18855 (PMC5222558; doi:10.7554/eLife.18855)
Supplement: Figure 4—source data 3. — DOI: http://dx.doi.org/10.7554/eLife.18855.026 [file elife-18855-fig4-data3.xlsx]

## Sheet: Exp1
Experiment #	Fly Strain	Test Arm	Control Arm	Test Side	Time_Experiment	Center Flies	Experiment #	Left side	right side	Left Side RI	Test Arm	Control Arm	Test Arm RI
1	Canton-S (CR)	Mock	Mock	L	08:30:00	9	1	38	25	0.180556	38	25	0.180556	0.0270189
2	Canton-S (CR)	Mock	Mock	R	08:35:00	6	2	37	25	0.176471	25	37	-0.176471
3	Canton-S (CR)	Mock	Mock	L	08:40:00	7	3	27	30	-0.046875	27	30	-0.046875
4	Canton-S (CR)	Mock	Mock	R	08:45:00	3	4	28	21	0.134615	21	28	-0.134615
5	Canton-S (CR)	Mock	Mock	L	08:50:00	9	5	36	19	0.265625	36	19	0.265625
6	Canton-S (CR)	Mock	Mock	R	08:55:00	7	6	25	25	0	25	25	0
7	Canton-S (CR)	SCAP WT	SC + Ap Wt	L	09:45:00	2	7	46	15	0.492063	46	15	0.492063	0.333752
8	Canton-S (CR)	SCAP WT	Sc + Ap WT	R	09:50:00	1	8	31	42	-0.148649	42	31	0.148649
9	Canton-S (CR)	SCAP WT	Sc + Ap WT	L	09:55:00	2	9	39	28	0.15942	39	28	0.15942
10	Canton-S (CR)	SCAP WT	Sc + Ap WT	R	10:00:00	4	10	20	48	-0.388889	48	20	0.388889
11	Canton-S (CR)	SCAP WT	Sc + Ap WT	L	10:05:00	6	11	41	16	0.396825	41	16	0.396825
12	Canton-S (CR)	SCAP WT	Sc + Ap WT	R	10:10:00	0	12	21	51	-0.416667	51	21	0.416667
13	Canton-S (CR)	SCAP PQQ-ADH	SC + Ap Wt	L	09:45:00	7	13	32	25	0.109375	32	25	0.109375	-0.00767224
14	Canton-S (CR)	SCAP PQQ-ADH	Sc + Ap WT	R	09:50:00	5	14	29	30	-0.015625	30	29	0.015625
15	Canton-S (CR)	SCAP PQQ-ADH	Sc + Ap WT	L	09:55:00	9	15	21	28	-0.12069	21	28	-0.12069
16	Canton-S (CR)	SCAP PQQ-ADH	Sc + Ap WT	R	10:00:00	6	16	26	36	-0.147059	36	26	0.147059
17	Canton-S (CR)	SCAP PQQ-ADH	Sc + Ap WT	L	10:05:00	5	17	24	41	-0.242857	24	41	-0.242857
18	Canton-S (CR)	SCAP PQQ-ADH	Sc + Ap WT	R	10:10:00	6	18	18	20	-0.0454545	20	18	0.0454545

## Sheet: Exp2
Experiment #	Fly Strain	Test Arm	Control Arm	Test Side	Time_Experiment	Center Flies	Experiment #	Left side	right side	Left Side RI	Test Arm	Control Arm	Test Arm RI
1	Canton-S (CR)	Mock	Mock	L	08:30:00	11	1	22	34	-0.179104	22	34	-0.179104	-0.0467016
2	Canton-S (CR)	Mock	Mock	R	08:35:00	9	2	36	20	0.246154	20	36	-0.246154
3	Canton-S (CR)	Mock	Mock	L	08:40:00	8	3	36	28	0.111111	36	28	0.111111
4	Canton-S (CR)	Mock	Mock	R	08:45:00	8	4	29	29	0	29	29	0
5	Canton-S (CR)	Mock	Mock	L	08:50:00	12	5	36	21	0.217391	36	21	0.217391
6	Canton-S (CR)	Mock	Mock	R	08:55:00	10	6	35	33	0.025641	33	35	-0.025641
7	Canton-S (CR)	SCAP WT	SC + Ap Wt	L	09:45:00	7	7	45	25	0.25974	45	25	0.25974	0.293181
8	Canton-S (CR)	SCAP WT	Sc + Ap WT	R	09:50:00	6	8	18	43	-0.373134	43	18	0.373134
9	Canton-S (CR)	SCAP WT	Sc + Ap WT	L	09:55:00	3	9	45	30	0.192308	45	30	0.192308
10	Canton-S (CR)	SCAP WT	Sc + Ap WT	R	10:00:00	6	10	23	39	-0.235294	39	23	0.235294
11	Canton-S (CR)	SCAP WT	Sc + Ap WT	L	10:05:00	6	11	46	20	0.361111	46	20	0.361111
12	Canton-S (CR)	SCAP WT	Sc + Ap WT	R	10:10:00	3	12	25	52	-0.3375	52	25	0.3375
13	Canton-S (CR)	SCAP PQQ-ADH	SC + Ap Wt	L	#REF!	8	13	26	35	-0.130435	26	35	-0.130435	-0.124044
14	Canton-S (CR)	SCAP PQQ-ADH	Sc + Ap WT	R	#REF!	5	14	25	35	-0.153846	35	25	0.153846
15	Canton-S (CR)	SCAP PQQ-ADH	Sc + Ap WT	L	#REF!	5	15	23	35	-0.190476	23	35	-0.190476
16	Canton-S (CR)	SCAP PQQ-ADH	Sc + Ap WT	R	#REF!	3	16	42	20	0.338462	20	42	-0.338462
17	Canton-S (CR)	SCAP PQQ-ADH	Sc + Ap WT	L	#REF!	5	17	38	31	0.0945946	38	31	0.0945946
18	Canton-S (CR)	SCAP PQQ-ADH	Sc + Ap WT	R	#REF!	8	18	48	22	0.333333	22	48	-0.333333

## Sheet: Exp3
Experiment #	Fly Strain	Test Arm	Control Arm	Test Side	Time_Experiment	Center Flies	Experiment #	Left side	right side	Left Side RI	Test Arm	Control Arm	Test Arm RI
1	Canton-S (CR)	Mock	Mock	L	08:30:00	8	1	30	21	0.152542	30	21	0.152542	0.0341112
2	Canton-S (CR)	Mock	Mock	R	08:35:00	5	2	37	33	0.0533333	33	37	-0.0533333
3	Canton-S (CR)	Mock	Mock	L	08:40:00	5	3	47	25	0.285714	47	25	0.285714
4	Canton-S (CR)	Mock	Mock	R	08:45:00	8	4	45	32	0.152941	32	45	-0.152941
5	Canton-S (CR)	Mock	Mock	L	08:50:00	2	5	35	39	-0.0526316	35	39	-0.0526316
6	Canton-S (CR)	Mock	Mock	R	08:55:00	9	6	34	36	-0.0253165	36	34	0.0253165
7	Canton-S (CR)	SCAP WT	SC + Ap Wt	L	09:45:00	4	7	46	34	0.142857	46	34	0.142857	0.194463
8	Canton-S (CR)	SCAP WT	Sc + Ap WT	R	09:50:00	5	8	28	54	-0.298851	54	28	0.298851
9	Canton-S (CR)	SCAP WT	Sc + Ap WT	L	09:55:00	6	9	45	21	0.333333	45	21	0.333333
10	Canton-S (CR)	SCAP WT	Sc + Ap WT	R	10:00:00	3	10	27	45	-0.24	45	27	0.24
11	Canton-S (CR)	SCAP WT	Sc + Ap WT	L	10:05:00	2	11	48	31	0.209877	48	31	0.209877
12	Canton-S (CR)	SCAP WT	Sc + Ap WT	R	10:10:00	5	12	43	38	0.0581395	38	43	-0.0581395
13	Canton-S (CR)	SCAP PQQ-ADH	SC + Ap Wt	L	09:45:00	4	13	19	43	-0.363636	19	43	-0.363636	-0.115989
14	Canton-S (CR)	SCAP PQQ-ADH	Sc + Ap WT	R	09:50:00	3	14	33	36	-0.0416667	36	33	0.0416667
15	Canton-S (CR)	SCAP PQQ-ADH	Sc + Ap WT	L	09:55:00	3	15	41	36	0.0625	41	36	0.0625
16	Canton-S (CR)	SCAP PQQ-ADH	Sc + Ap WT	R	10:00:00	4	16	41	26	0.211268	26	41	-0.211268
17	Canton-S (CR)	SCAP PQQ-ADH	Sc + Ap WT	L	10:05:00	2	17	36	40	-0.0512821	36	40	-0.0512821
18	Canton-S (CR)	SCAP PQQ-ADH	Sc + Ap WT	R	10:10:00	3	18	39	27	0.173913	27	39	-0.173913

## Sheet: Exp4
Experiment #	Fly Strain	Test Arm	Control Arm	Test Side	Time_Experiment	Center Flies	Experiment #	Left side	right side	Left Side RI	Test Arm	Control Arm	Test Arm RI
1	Canton-S (CR)	Mock	Mock	L	08:30:00	10	1	29	35	-0.0810811	29	35	-0.0810811	-0.0471443
2	Canton-S (CR)	Mock	Mock	R	08:35:00	6	2	33	35	-0.027027	35	33	0.027027
3	Canton-S (CR)	Mock	Mock	L	08:40:00	7	3	39	25	0.197183	39	25	0.197183
4	Canton-S (CR)	Mock	Mock	R	08:45:00	6	4	40	35	0.0617284	35	40	-0.0617284
5	Canton-S (CR)	Mock	Mock	L	08:50:00	7	5	20	18	0.0444444	20	18	0.0444444
6	Canton-S (CR)	Mock	Mock	R	08:55:00	7	6	39	27	0.164384	27	39	-0.164384
7	Canton-S (CR)	SCAP WT	SC + Ap Wt	L	09:45:00	4	7	46	10	0.6	46	10	0.6	0.329464
8	Canton-S (CR)	SCAP WT	Sc + Ap WT	R	09:50:00	5	8	27	48	-0.2625	48	27	0.2625
9	Canton-S (CR)	SCAP WT	Sc + Ap WT	L	09:55:00	3	9	51	19	0.438356	51	19	0.438356
10	Canton-S (CR)	SCAP WT	Sc + Ap WT	R	10:00:00	3	10	43	62	-0.175926	62	43	0.175926
11	Canton-S (CR)	SCAP WT	Sc + Ap WT	L	10:05:00	7	11	51	18	0.434211	51	18	0.434211
12	Canton-S (CR)	SCAP WT	Sc + Ap WT	R	10:10:00	3	12	34	39	-0.0657895	39	34	0.0657895
13	Canton-S (CR)	SCAP PQQ-ADH	SC + Ap Wt	L	09:45:00	9	13	32	35	-0.0394737	32	35	-0.0394737	-0.00712611
14	Canton-S (CR)	SCAP PQQ-ADH	Sc + Ap WT	R	09:50:00	1	14	32	33	-0.0151515	33	32	0.0151515
15	Canton-S (CR)	SCAP PQQ-ADH	Sc + Ap WT	L	09:55:00	1	15	48	37	0.127907	48	37	0.127907
16	Canton-S (CR)	SCAP PQQ-ADH	Sc + Ap WT	R	10:00:00	6	16	44	32	0.146341	32	44	-0.146341
17	Canton-S (CR)	SCAP PQQ-ADH	Sc + Ap WT	L	10:05:00	3	17	38	38	0	38	38	0
18	Canton-S (CR)	SCAP PQQ-ADH	Sc + Ap WT	R	10:10:00	0	18	41	41	0	41	41	0

## Sheet: Exp5
Experiment #	Fly Strain	Test Arm	Control Arm	Test Side	Time_Experiment	Center Flies	Experiment #	Left side	right side	Left Side RI	Test Arm	Control Arm	Test Arm RI
1	Canton-S (CR)	Mock	Mock	L	08:30:00	3	1	34	31	0.0441176	34	31	0.0441176	#DIV/0!
2	Canton-S (CR)	Mock	Mock	R	08:35:00	2	2	40	38	0.025	38	40	-0.025
3	Canton-S (CR)	Mock	Mock	L	08:40:00	5	3	30	30	0	30	30	0
4	Canton-S (CR)	Mock	Mock	R	08:45:00	4	4	30	30	0	30	30	0
5	Canton-S (CR)	Mock	Mock	L	08:50:00		5			#DIV/0!	0	0	#DIV/0!
6	Canton-S (CR)	Mock	Mock	R	08:55:00		6			#DIV/0!	0	0	#DIV/0!
7	Canton-S (CR)	SCAP WT	SC + Ap Wt	L	09:45:00	4	7	41	44	-0.0337079	41	44	-0.0337079	0.351968
8	Canton-S (CR)	SCAP WT	Sc + Ap WT	R	09:50:00	0	8	20	63	-0.518072	63	20	0.518072
9	Canton-S (CR)	SCAP WT	Sc + Ap WT	L	09:55:00	1	9	39	30	0.128571	39	30	0.128571
10	Canton-S (CR)	SCAP WT	Sc + Ap WT	R	10:00:00	3	10	14	52	-0.550725	52	14	0.550725
11	Canton-S (CR)	SCAP WT	Sc + Ap WT	L	10:05:00	1	11	62	24	0.436782	62	24	0.436782
12	Canton-S (CR)	SCAP WT	Sc + Ap WT	R	10:10:00	1	12	21	66	-0.511364	66	21	0.511364
13	Canton-S (CR)	SCAP PQQ-ADH	SC + Ap Wt	L	09:45:00	8	13	43	28	0.189873	43	28	0.189873	0.088929
14	Canton-S (CR)	SCAP PQQ-ADH	Sc + Ap WT	R	09:50:00	5	14	27	31	-0.0634921	31	27	0.0634921
15	Canton-S (CR)	SCAP PQQ-ADH	Sc + Ap WT	L	09:55:00	7	15	48	29	0.22619	48	29	0.22619
16	Canton-S (CR)	SCAP PQQ-ADH	Sc + Ap WT	R	10:00:00	4	16	38	37	0.0126582	37	38	-0.0126582
17	Canton-S (CR)	SCAP PQQ-ADH	Sc + Ap WT	L	10:05:00	6	17	35	38	-0.0379747	35	38	-0.0379747
18	Canton-S (CR)	SCAP PQQ-ADH	Sc + Ap WT	R	10:10:00	7	18	35	44	-0.104651	44	35	0.104651

## Sheet: Exp6
Experiment #	Fly Strain	Test Arm	Control Arm	Test Side	Time_Experiment	Center Flies	Experiment #	Left Arm	Right Arm	Left Side RI	Test Arm	Control Arm	Test Arm RI
1	Canton-S (CR)	Mock	Mock	L	11:00:00	16	1	26	18	0.133333	26	18	0.133333	-0.000111228
2	Canton-S (CR)	Mock	Mock	R	11:05:00	4	2	18	26	-0.166667	26	18	0.166667	0.0562193
3	Canton-S (CR)	Mock	Mock	L	11:10:00	13	3	34	26	0.109589	34	26	0.109589
4	Canton-S (CR)	Mock	Mock	R	11:15:00	6	4	21	25	-0.0769231	25	21	0.0769231
5	Canton-S (CR)	Mock	Mock	L	11:20:00	11	5	19	24	-0.0925926	19	24	-0.0925926
6	Canton-S (CR)	Mock	Mock	R	11:25:00	12	6	22	19	0.0566038	19	22	-0.0566038
7	Canton-S (CR)	SCAP WT	SC + Ap	L	11:30:00	8	7	38	21	0.253731	38	21	0.253731	0.345961
8	Canton-S (CR)	SCAP WT	SC + Ap	R	11:35:00	7	8	15	41	-0.412698	41	15	0.412698
9	Canton-S (CR)	SCAP WT	SC + Ap	L	11:40:00	3	9	29	16	0.270833	29	16	0.270833
10	Canton-S (CR)	SCAP WT	SC + Ap	R	11:45:00	10	10	17	35	-0.290323	35	17	0.290323
11	Canton-S (CR)	SCAP WT	SC + Ap	L	11:50:00	3	11	43	16	0.435484	43	16	0.435484
12	Canton-S (CR)	SCAP WT	SC + Ap	R	11:55:00	5	12	16	42	-0.412698	42	16	0.412698
13	Canton-S (CR)	SCAP PQQ	SC + Ap	L	12:25:00	10	13	17	23	-0.12	17	23	-0.12	-0.0443304
14	Canton-S (CR)	SCAP PQQ	SC + Ap	R	12:30:00	7	14	25	23	0.0363636	23	25	-0.0363636
15	Canton-S (CR)	SCAP PQQ	SC + Ap	b	12:35:00	6	15	17	21	-0.0909091	17	21	-0.0909091
16	Canton-S (CR)	SCAP PQQ	SC + Ap	R	12:40:00	5	16	26	25	0.0178571	25	26	-0.0178571
17	Canton-S (CR)	SCAP PQQ	SC + Ap	L	12:45:00	8	17	28	32	-0.0588235	28	32	-0.0588235
18	Canton-S (CR)	SCAP PQQ	SC + Ap	R	12:50:00	15	18	25	29	-0.057971	29	25	0.057971

## Sheet: Exp7
Experiment #	Fly Strain	Test Arm	Control Arm	Test Side	Time_Experiment	Center Flies	Experiment #	Left Arm	Right Arm	Left Side RI	Test Arm	Control Arm	Test Arm RI
1	Canton-S (CR)	Mock	Mock	L	11:00:00	11	1	38	28	0.12987	38	28	0.12987	0.0346036
2	Canton-S (CR)	Mock	Mock	R	11:05:00	12	2	30	28	0.0285714	28	30	-0.0285714	-0.000958443
3	Canton-S (CR)	Mock	Mock	L	11:10:00	10	3	27	24	0.0491803	27	24	0.0491803
4	Canton-S (CR)	Mock	Mock	R	11:15:00	14	4	26	26	0	26	26	0
5	Canton-S (CR)	Mock	Mock	L	11:20:00	6	5	29	30	-0.0153846	29	30	-0.0153846
6	Canton-S (CR)	Mock	Mock	R	11:25:00	5	6	38	28	0.140845	28	38	-0.140845
7	Canton-S (CR)	SCAP WT	SC + Ap	L	11:30:00	4	7	40	19	0.333333	40	19	0.333333	0.358938
8	Canton-S (CR)	SCAP WT	SC + Ap	R	11:35:00	4	8	18	46	-0.411765	46	18	0.411765
9	Canton-S (CR)	SCAP WT	SC + Ap	L	11:40:00	2	9	56	22	0.425	56	22	0.425
10	Canton-S (CR)	SCAP WT	SC + Ap	R	11:45:00	6	10	22	44	-0.305556	44	22	0.305556
11	Canton-S (CR)	SCAP WT	SC + Ap	L	11:50:00	6	11	44	16	0.424242	44	16	0.424242
12	Canton-S (CR)	SCAP WT	SC + Ap	R	11:55:00	6	12	22	39	-0.253731	39	22	0.253731
13	Canton-S (CR)	SCAP PQQ	SC + Ap	L	12:25:00	4	13	34	33	0.0140845	34	33	0.0140845	-0.0930127
14	Canton-S (CR)	SCAP PQQ	SC + Ap	R	12:30:00	6	14	37	19	0.290323	19	37	-0.290323
15	Canton-S (CR)	SCAP PQQ	SC + Ap	b	12:35:00	7	15	21	44	-0.319444	21	44	-0.319444
16	Canton-S (CR)	SCAP PQQ	SC + Ap	R	12:40:00	2	16	33	28	0.0793651	28	33	-0.0793651
17	Canton-S (CR)	SCAP PQQ	SC + Ap	L	12:45:00	5	17	28	21	0.12963	28	21	0.12963
18	Canton-S (CR)	SCAP PQQ	SC + Ap	R	12:50:00	2	18	39	38	0.0126582	38	39	-0.0126582

## Sheet: Exp8
Experiment #	Fly Strain	Test Arm	Control Arm	Test Side	Time_Experiment	Center Flies	Experiment #	Left side	right side	Left Side RI	Test Arm	Control Arm	Test Arm RI
1	Canton-S (CR)	Mock	Mock	L	08:20:00	5	1	42	28	0.186667	42	28	0.186667	0.0218654
2	Canton-S (CR)	Mock	Mock	R	08:25:00	8	2	40	25	0.205479	25	40	-0.205479
3	Canton-S (CR)	Mock	Mock	L	08:30:00	10	3	40	47	-0.0721649	40	47	-0.0721649
4	Canton-S (CR)	Mock	Mock	R	08:35:00	9	4	37	36	0.0121951	36	37	-0.0121951
5	Canton-S (CR)	Mock	Mock	L	08:40:00	5	5	46	29	0.2125	46	29	0.2125
6	Canton-S (CR)	Mock	Mock	R	08:45:00	4	6	31	36	-0.0704225	36	31	0.0704225
7	Canton-S (CR)	SCAP WT	SCAP ADH	L	#REF!	9	#REF!	54	20	0.409639	54	20	0.409639	0.403478
8	Canton-S (CR)	SCAP WT	SCAP ADH	R	#REF!	10	#REF!	24	69	-0.436893	69	24	0.436893
9	Canton-S (CR)	SCAP WT	SCAP ADH	L	#REF!	1	#REF!	75	26	0.480392	75	26	0.480392
10	Canton-S (CR)	SCAP WT	SCAP ADH	R	#REF!	8	#REF!	31	62	-0.306931	62	31	0.306931
11	Canton-S (CR)	SCAP WT	SCAP ADH	L	#REF!	6	#REF!	50	14	0.514286	50	14	0.514286
12	Canton-S (CR)	SCAP WT	SCAP ADH	R	#REF!	4	#REF!	26	47	-0.272727	47	26	0.272727
13	Canton-S (CR)	SCAP WT	SCAP ADH + esters (SCAM concentration)	L	#REF!	9	#REF!	52	31	0.228261	52	31	0.228261	0.141832
14	Canton-S (CR)	SCAP WT	SCAP ADH + esters (SCAM concentration)	R	#REF!	7	#REF!	33	49	-0.179775	49	33	0.179775
15	Canton-S (CR)	SCAP WT	SCAP ADH + esters (SCAM concentration)	L	#REF!	11	#REF!	50	50	0	50	50	0
16	Canton-S (CR)	SCAP WT	SCAP ADH + esters (SCAM concentration)	R	#REF!	12	#REF!	34	43	-0.101124	43	34	0.101124
17	Canton-S (CR)	SCAP WT	SCAP ADH + esters (SCAM concentration)	L	#REF!	8	#REF!	47	30	0.2	47	30	0.2
18	Canton-S (CR)	SCAP WT	SCAP ADH + esters (SCAM concentration)	R	#REF!	12	#REF!	46	44	0.0196078	44	46	-0.0196078
19	Canton-S (CR)	SCAP WT	SCAP ADH + esters (SCAM concentration) + acid (1.5% final)	L	#REF!	13	#REF!	67	30	0.336364	67	30	0.336364	0.0790223
20	Canton-S (CR)	SCAP WT	SCAP ADH + esters (SCAM concentration) + acid (1.5% final)	R	#REF!	9	#REF!	34	47	-0.144444	47	34	0.144444
21	Canton-S (CR)	SCAP WT	SCAP ADH + esters (SCAM concentration) + acid (1.5% final)	L	#REF!	8	#REF!	44	40	0.0434783	44	40	0.0434783
22	Canton-S (CR)	SCAP WT	SCAP ADH + esters (SCAM concentration) + acid (1.5% final)	R	#REF!	10	#REF!	37	36	0.0120482	36	37	-0.0120482
23	Canton-S (CR)	SCAP WT	SCAP ADH + esters (SCAM concentration) + acid (1.5% final)	L	#REF!	10	#REF!	47	35	0.130435	47	35	0.130435
24	Canton-S (CR)	SCAP WT	SCAP ADH + esters (SCAM concentration) + acid (1.5% final)	R	#REF!	12	#REF!	46	31	0.168539	31	46	-0.168539
25	Canton-S (CR)	SCAP WT + ethanol	SCAP ADH + esters (SCAM concentration)	L	16:00:00	9	#REF!	51	25	0.305882	51	25	0.305882	0.126561
26	Canton-S (CR)	SCAP WT + ethanol	SCAP ADH + esters (SCAM concentration)	R	16:05:00	15	#REF!	28	44	-0.183908	44	28	0.183908
27	Canton-S (CR)	SCAP WT + ethanol	SCAP ADH + esters (SCAM concentration)	L	16:10:00	7	#REF!	43	32	0.134146	43	32	0.134146
28	Canton-S (CR)	SCAP WT + ethanol	SCAP ADH + esters (SCAM concentration)	R	16:15:00	13	#REF!	36	33	0.0365854	33	36	-0.0365854
29	Canton-S (CR)	SCAP WT + ethanol	SCAP ADH + esters (SCAM concentration)	L	16:20:00	10	#REF!	41	37	0.0454545	41	37	0.0454545
30	Canton-S (CR)	SCAP WT + ethanol	SCAP ADH + esters (SCAM concentration)	R	16:25:00	12	#REF!	44	36	0.0869565	36	44	-0.0869565
31	Canton-S (CR)	SCAP WT	SCAP ADH + esters (SCAM concentration) + acetoin (7.5ul/500ul)	L	16:00:00	7	#REF!	34	34	0	34	34	0	0.000784725
32	Canton-S (CR)	SCAP WT	SCAP ADH + esters (SCAM concentration) + acetoin (7.5ul/500ul)	R	16:05:00	9	#REF!	42	45	-0.03125	45	42	0.03125
33	Canton-S (CR)	SCAP WT	SCAP ADH + esters (SCAM concentration) + acetoin (7.5ul/500ul)	L	16:10:00	6	#REF!	52	38	0.145833	52	38	0.145833
34	Canton-S (CR)	SCAP WT	SCAP ADH + esters (SCAM concentration) + acetoin (7.5ul/500ul)	R	16:15:00	11	#REF!	51	39	0.118812	39	51	-0.118812
35	Canton-S (CR)	SCAP WT	SCAP ADH + esters (SCAM concentration) + acetoin (7.5ul/500ul)	L	16:20:00	9	#REF!	39	44	-0.0543478	39	44	-0.0543478
36	Canton-S (CR)	SCAP WT	SCAP ADH + esters (SCAM concentration) + acetoin (7.5ul/500ul)	R	16:25:00	9	#REF!	50	30	0.224719	30	50	-0.224719

## Sheet: Exp9
Experiment #	Fly Strain	Test Arm	Control Arm	Test Side	Time_Experiment	Center Flies	Experiment #	Left side	right side	Left Side RI	Test Arm	Control Arm	Test Arm RI
1	Canton-S (CR)	Mock	Mock	L	08:20:00	1	1	38	44	-0.0722892	38	44	-0.0722892	-0.0281001
2	Canton-S (CR)	Mock	Mock	R	08:25:00	4	2	48	47	0.010101	47	48	-0.010101
3	Canton-S (CR)	Mock	Mock	L	08:30:00	11	3	54	39	0.144231	54	39	0.144231
4	Canton-S (CR)	Mock	Mock	R	08:35:00	6	4	47	39	0.0869565	39	47	-0.0869565
5	Canton-S (CR)	Mock	Mock	L	08:40:00	2	5	45	57	-0.115385	45	57	-0.115385
6	Canton-S (CR)	Mock	Mock	R	08:45:00	8	6	35	31	0.0540541	31	35	-0.0540541
7	Canton-S (CR)	SCAP WT 72 h	SCAP ADH	L	09:00:00	1	7	63	36	0.27	63	36	0.27	0.434986
8	Canton-S (CR)	SCAP WT 72 h	SCAP ADH	R	09:05:00	6	8	34	66	-0.301887	66	34	0.301887
9	Canton-S (CR)	SCAP WT 72 h	SCAP ADH	L	09:10:00	6	9	75	14	0.642105	75	14	0.642105
10	Canton-S (CR)	SCAP WT 72 h	SCAP ADH	R	09:15:00	7	10	27	64	-0.377551	64	27	0.377551
11	Canton-S (CR)	SCAP WT 72 h	SCAP ADH	L	09:20:00	9	11	69	28	0.386792	69	28	0.386792
12	Canton-S (CR)	SCAP WT 72 h	SCAP ADH	R	09:25:00	9	12	13	73	-0.631579	73	13	0.631579
13	Canton-S (CR)	SCAP WT 72 h	SCAP ADH + esters (SCAM concentration)	L	09:50:00	9	13	64	27	0.37	64	27	0.37	0.273346
14	Canton-S (CR)	SCAP WT 72 h	SCAP ADH + esters (SCAM concentration)	R	09:55:00	6	14	39	61	-0.207547	61	39	0.207547
15	Canton-S (CR)	SCAP WT 72 h	SCAP ADH + esters (SCAM concentration)	L	10:00:00	6	15	58	27	0.340659	58	27	0.340659
16	Canton-S (CR)	SCAP WT 72 h	SCAP ADH + esters (SCAM concentration)	R	10:05:00	2	16	25	50	-0.324675	50	25	0.324675
17	Canton-S (CR)	SCAP WT 72 h	SCAP ADH + esters (SCAM concentration)	L	10:10:00	11	17	55	32	0.234694	55	32	0.234694
18	Canton-S (CR)	SCAP WT 72 h	SCAP ADH + esters (SCAM concentration)	R	10:15:00	11	18	28	41	-0.1625	41	28	0.1625
19	Canton-S (CR)	SCAP WT 72 h	SCAP ADH + esters (SCAM concentration) + acid (1.5% final)	L	10:40:00	5	19	57	32	0.265957	57	32	0.265957	0.128254
20	Canton-S (CR)	SCAP WT 72 h	SCAP ADH + esters (SCAM concentration) + acid (1.5% final)	R	10:45:00	4	20	44	50	-0.0612245	50	44	0.0612245
21	Canton-S (CR)	SCAP WT 72 h	SCAP ADH + esters (SCAM concentration) + acid (1.5% final)	L	10:50:00	7	21	45	45	0	45	45	0
22	Canton-S (CR)	SCAP WT 72 h	SCAP ADH + esters (SCAM concentration) + acid (1.5% final)	R	10:55:00	7	22	51	46	0.0480769	46	51	-0.0480769
23	Canton-S (CR)	SCAP WT 72 h	SCAP ADH + esters (SCAM concentration) + acid (1.5% final)	L	11:00:00	10	23	74	31	0.373913	74	31	0.373913
24	Canton-S (CR)	SCAP WT 72 h	SCAP ADH + esters (SCAM concentration) + acid (1.5% final)	R	11:05:00	11	24	40	52	-0.116505	52	40	0.116505
25	Canton-S (CR)	SCAP WT + ethanol	SCAP ADH + esters (SCAM concentration)	L	11:30:00	4	25	60	35	0.252525	60	35	0.252525	0.242015
26	Canton-S (CR)	SCAP WT + ethanol	SCAP ADH + esters (SCAM concentration)	R	11:35:00	9	26	26	52	-0.298851	52	26	0.298851
27	Canton-S (CR)	SCAP WT + ethanol	SCAP ADH + esters (SCAM concentration)	L	11:40:00	2	27	57	25	0.380952	57	25	0.380952
28	Canton-S (CR)	SCAP WT + ethanol	SCAP ADH + esters (SCAM concentration)	R	11:45:00	9	28	35	59	-0.23301	59	35	0.23301
29	Canton-S (CR)	SCAP WT + ethanol	SCAP ADH + esters (SCAM concentration)	L	11:50:00	9	29	51	46	0.0471698	51	46	0.0471698
30	Canton-S (CR)	SCAP WT + ethanol	SCAP ADH + esters (SCAM concentration)	R	11:55:00	7	30	33	56	-0.239583	56	33	0.239583
31	Canton-S (CR)	SCAP WT + ethanol	SCAP ADH + esters (SCAM concentration) + acid (1.5% final)	L	16:00:00	9	31	54	37	0.17	54	37	0.17	0.107837
32	Canton-S (CR)	SCAP WT + ethanol	SCAP ADH + esters (SCAM concentration) + acid (1.5% final)	R	16:05:00	9	32	37	39	-0.0235294	39	37	0.0235294
33	Canton-S (CR)	SCAP WT + ethanol	SCAP ADH + esters (SCAM concentration) + acid (1.5% final)	L	16:10:00	9	33	52	28	0.269663	52	28	0.269663
34	Canton-S (CR)	SCAP WT + ethanol	SCAP ADH + esters (SCAM concentration) + acid (1.5% final)	R	16:15:00	13	34	50	50	0	50	50	0
35	Canton-S (CR)	SCAP WT + ethanol	SCAP ADH + esters (SCAM concentration) + acid (1.5% final)	L	16:20:00	7	35	44	30	0.17284	44	30	0.17284
36	Canton-S (CR)	SCAP WT + ethanol	SCAP ADH + esters (SCAM concentration) + acid (1.5% final)	R	16:25:00	4	36	43	44	-0.010989	44	43	0.010989
37	Canton-S (CR)	SCAP WT	SCAP ADH + esters (SCAM concentration) + acetoin (7.5ul/500ul)	L	16:00:00	10	37	31	29	0.0285714	31	29	0.0285714	0.0570928
38	Canton-S (CR)	SCAP WT	SCAP ADH + esters (SCAM concentration) + acetoin (7.5ul/500ul)	R	16:05:00	7	38	38	47	-0.0978261	47	38	0.0978261
39	Canton-S (CR)	SCAP WT	SCAP ADH + esters (SCAM concentration) + acetoin (7.5ul/500ul)	L	16:10:00	6	39	51	33	0.2	51	33	0.2
40	Canton-S (CR)	SCAP WT	SCAP ADH + esters (SCAM concentration) + acetoin (7.5ul/500ul)	R	16:15:00	6	40	46	30	0.195122	30	46	-0.195122
41	Canton-S (CR)	SCAP WT	SCAP ADH + esters (SCAM concentration) + acetoin (7.5ul/500ul)	L	16:20:00	9	41	47	41	0.0618557	47	41	0.0618557
42	Canton-S (CR)	SCAP WT	SCAP ADH + esters (SCAM concentration) + acetoin (7.5ul/500ul)	R	16:25:00	10	42	32	45	-0.149425	45	32	0.149425
43	Canton-S (CR)	SCAP WT	ScAP ADH+ all esters (SCAM) + acid, ethyl lactate + acetald der (0.75ul)	L	16:00:00	7	43	40	51	-0.112245	40	51	-0.112245	-0.203314
44	Canton-S (CR)	SCAP WT	ScAP ADH+ all esters (SCAM) + acid, ethyl lactate + acetald der (0.75ul)	R	16:05:00	9	44	41	30	0.1375	30	41	-0.1375
45	Canton-S (CR)	SCAP WT	ScAP ADH+ all esters (SCAM) + acid, ethyl lactate + acetald der (0.75ul)	L	16:10:00	13	45	24	50	-0.298851	24	50	-0.298851
46	Canton-S (CR)	SCAP WT	ScAP ADH+ all esters (SCAM) + acid, ethyl lactate + acetald der (0.75ul)	R	16:15:00	4	46	61	27	0.369565	27	61	-0.369565
47	Canton-S (CR)	SCAP WT	ScAP ADH+ all esters (SCAM) + acid, ethyl lactate + acetald der (0.75ul)	L	16:20:00	2	47	54	60	-0.0517241	54	60	-0.0517241
48	Canton-S (CR)	SCAP WT	ScAP ADH+ all esters (SCAM) + acid, ethyl lactate + acetald der (0.75ul)	R	16:25:00	10	48	50	28	0.25	28	50	-0.25

## Sheet: Exp10
Experiment #	Fly Strain	Test Arm	Control Arm	Test Side	Time_Experiment	Center Flies	Experiment #	Left side	right side	Left Side RI	Test Arm	Control Arm	Test Arm RI
1	Canton-S (CR)	Mock	Mock	L	09:00:00	4	1	50	53	-0.0280374	50	53	-0.0280374	-0.0128998
2	Canton-S (CR)	Mock	Mock	R	09:05:00	9	2	60	41	0.172727	41	60	-0.172727
3	Canton-S (CR)	Mock	Mock	L	09:10:00	8	3	51	41	0.1	51	41	0.1
4	Canton-S (CR)	Mock	Mock	R	09:15:00	16	4	46	37	0.0909091	37	46	-0.0909091
5	Canton-S (CR)	Mock	Mock	L	09:20:00	9	5	47	32	0.170455	47	32	0.170455
6	Canton-S (CR)	Mock	Mock	R	09:25:00	6	6	44	39	0.0561798	39	44	-0.0561798
7	Canton-S (CR)	SCAP WT 72 h	SCAP ADH	L	09:55:00	2	7	66	22	0.488889	66	22	0.488889	0.364461
8	Canton-S (CR)	SCAP WT 72 h	SCAP ADH	R	10:00:00	6	8	30	59	-0.305263	59	30	0.305263
9	Canton-S (CR)	SCAP WT 72 h	SCAP ADH	L	10:05:00	7	9	67	32	0.330189	67	32	0.330189
10	Canton-S (CR)	SCAP WT 72 h	SCAP ADH	R	10:10:00	8	10	30	45	-0.180723	45	30	0.180723
11	Canton-S (CR)	SCAP WT 72 h	SCAP ADH	L	10:15:00	8	11	76	21	0.52381	76	21	0.52381
12	Canton-S (CR)	SCAP WT 72 h	SCAP ADH	R	10:20:00	11	12	25	59	-0.357895	59	25	0.357895
13	Canton-S (CR)	SCAP WT 72 h	SCAP ADH + esters (SCAM concentration) no ethyl acetate	L	10:50:00	8	13	62	29	0.333333	62	29	0.333333	0.270584
14	Canton-S (CR)	SCAP WT 72 h	SCAP ADH + esters (SCAM concentration) no ethyl acetate	R	10:55:00	2	14	34	66	-0.313725	66	34	0.313725
15	Canton-S (CR)	SCAP WT 72 h	SCAP ADH + esters (SCAM concentration) no ethyl acetate	L	11:00:00	9	15	68	43	0.208333	68	43	0.208333
16	Canton-S (CR)	SCAP WT 72 h	SCAP ADH + esters (SCAM concentration) no ethyl acetate	R	11:05:00	7	16	35	63	-0.266667	63	35	0.266667
17	Canton-S (CR)	SCAP WT 72 h	SCAP ADH + esters (SCAM concentration) no ethyl acetate	L	11:10:00	9	17	68	32	0.330275	68	32	0.330275
18	Canton-S (CR)	SCAP WT 72 h	SCAP ADH + esters (SCAM concentration) no ethyl acetate	R	11:15:00	10	18	41	60	-0.171171	60	41	0.171171
19	Canton-S (CR)	SCAP WT 72 h	SCAP ADH + esters (SCAM concentration)	L	11:45:00	10	19	58	50	0.0677966	58	50	0.0677966	0.072129
20	Canton-S (CR)	SCAP WT 72 h	SCAP ADH + esters (SCAM concentration)	R	11:50:00	8	20	39	39	0	39	39	0
21	Canton-S (CR)	SCAP WT 72 h	SCAP ADH + esters (SCAM concentration)	L	11:55:00	8	21	46	34	0.136364	46	34	0.136364
22	Canton-S (CR)	SCAP WT 72 h	SCAP ADH + esters (SCAM concentration)	R	12:00:00	12	22	47	54	-0.0619469	54	47	0.0619469
23	Canton-S (CR)	SCAP WT 72 h	SCAP ADH + esters (SCAM concentration)	L	12:05:00	9	23	60	39	0.194444	60	39	0.194444
24	Canton-S (CR)	SCAP WT 72 h	SCAP ADH + esters (SCAM concentration)	R	12:10:00	11	24	50	47	0.0277778	47	50	-0.0277778
25	Canton-S (CR)	SCAP WT 72 h	SCAP ADH + esters (SCAM concentration) + acid (1.5% final)	L	12:40:00	5	25	51	45	0.0594059	51	45	0.0594059	-0.0444173
26	Canton-S (CR)	SCAP WT 72 h	SCAP ADH + esters (SCAM concentration) + acid (1.5% final)	R	12:45:00	7	26	51	49	0.0186916	49	51	-0.0186916
27	Canton-S (CR)	SCAP WT 72 h	SCAP ADH + esters (SCAM concentration) + acid (1.5% final)	L	12:50:00	5	27	60	54	0.0504202	60	54	0.0504202
28	Canton-S (CR)	SCAP WT 72 h	SCAP ADH + esters (SCAM concentration) + acid (1.5% final)	R	12:55:00	6	28	65	51	0.114754	51	65	-0.114754
29	Canton-S (CR)	SCAP WT 72 h	SCAP ADH + esters (SCAM concentration) + acid (1.5% final)	L	13:00:00	5	29	40	48	-0.0860215	40	48	-0.0860215
30	Canton-S (CR)	SCAP WT 72 h	SCAP ADH + esters (SCAM concentration) + acid (1.5% final)	R	13:05:00	8	30	55	39	0.156863	39	55	-0.156863
31	Canton-S (CR)	SCAP WT + ethanol	SCAP ADH + esters (SCAM concentration) + acid (1.5% final)	L	13:35:00	4	31	53	50	0.0280374	53	50	0.0280374	-0.0668604
32	Canton-S (CR)	SCAP WT + ethanol	SCAP ADH + esters (SCAM concentration) + acid (1.5% final)	R	13:40:00	7	32	48	39	0.0957447	39	48	-0.0957447
33	Canton-S (CR)	SCAP WT + ethanol	SCAP ADH + esters (SCAM concentration) + acid (1.5% final)	L	13:45:00	7	33	55	55	0	55	55	0
34	Canton-S (CR)	SCAP WT + ethanol	SCAP ADH + esters (SCAM concentration) + acid (1.5% final)	R	13:50:00	5	34	62	38	0.228571	38	62	-0.228571
35	Canton-S (CR)	SCAP WT + ethanol	SCAP ADH + esters (SCAM concentration) + acid (1.5% final)	L	13:55:00	7	35	38	41	-0.0348837	38	41	-0.0348837
36	Canton-S (CR)	SCAP WT + ethanol	SCAP ADH + esters (SCAM concentration) + acid (1.5% final)	R	14:00:00	5	36	51	44	0.07	44	51	-0.07
37	Canton-S (CR)	SCAP WT	SCAP ADH + esters (SCAM concentration) + acetoin (7.5ul/500ul)	L	14:30:00	7	37	32	50	-0.202247	32	50	-0.202247	0.00879085
38	Canton-S (CR)	SCAP WT	SCAP ADH + esters (SCAM concentration) + acetoin (7.5ul/500ul)	R	14:35:00	5	38	35	62	-0.264706	62	35	0.264706
39	Canton-S (CR)	SCAP WT	SCAP ADH + esters (SCAM concentration) + acetoin (7.5ul/500ul)	L	14:40:00	6	39	47	40	0.0752688	47	40	0.0752688
40	Canton-S (CR)	SCAP WT	SCAP ADH + esters (SCAM concentration) + acetoin (7.5ul/500ul)	R	14:45:00	9	40	60	48	0.102564	48	60	-0.102564
41	Canton-S (CR)	SCAP WT	ScAP ADH+ all esters (SCAM) + acid, ethyl lactate + acetald der (0.75ul)	L	14:50:00	7	41	32	66	-0.32381	32	66	-0.32381
42	Canton-S (CR)	SCAP WT	ScAP ADH+ all esters (SCAM) + acid, ethyl lactate + acetald der (0.75ul)	R	14:55:00	6	42	60	26	0.369565	26	60	-0.369565
43	Canton-S (CR)	SCAP WT	ScAP ADH+ all esters (SCAM) + acid, ethyl lactate + acetald der (0.75ul)	L	15:25:00	8	43	34	65	-0.28972	34	65	-0.28972	-0.480978
44	Canton-S (CR)	SCAP WT	ScAP ADH+ all esters (SCAM) + acid, ethyl lactate + acetald der (0.75ul)	R	15:30:00	6	44	77	34	0.367521	34	77	-0.367521
45	Canton-S (CR)	ACV (25%)	H20_4	L	15:35:00	1	45	16	95	-0.705357	16	95	-0.705357
46	Canton-S (CR)	ACV (25%)	H20_4	R	15:40:00	4	46	83	22	0.559633	22	83	-0.559633
47	Canton-S (CR)	ACV (25%)	H20_4	L	15:45:00	10	47	24	76	-0.472727	24	76	-0.472727
48	Canton-S (CR)	ACV (25%)	H20_4	R	15:50:00	10	48	77	23	0.490909	23	77	-0.490909

[truncated: 1 more sheets: Tmaze_calcs]
