# Supplementary material for: Metabolite exchange between microbiome members produces compounds that influence Drosophila behavior
Source: eLife. 2017 Jan 9;6:e18855. doi: 10.7554/eLife.18855 (PMC5222558; doi:10.7554/eLife.18855)
Supplement: Figure 5—figure supplement 1—source data 1. — DOI: http://dx.doi.org/10.7554/eLife.18855.041 [file elife-18855-fig5-figsupp1-data1.xlsx]

## Sheet: acetoin_88.05
2_18_16_mm1	extract mass 88.05	2_18_16_SCAPWT	extract mass 88.05	2_18_16_mm2	extract mass 88.05	2_18_16_mm3	extract mass 88.05	2_17_16_SCAPWT		2_18_16_SCAM		2_17_16_SCAPWT2		2_17_16_SCAPADH1		2_17_16_SCAPADH2		2_17_16_SCAPWTLP		2_17_16_SCAPADHLP		2_16_16_SCAMLP		2_16_16_SCAM		2_17_mm1		2_17mm2		2_17mm3		2_17ajm50p		2_16ajm		2_16am		2_16_Sc
2.844	0	2.843	0	2.844	1	2.843	0	2.844	0	2.844	0	2.844	0	2.844	0	2.844	0	2.843	0	2.844	0	2.84	0	2.839	0	2.848	0	2.848	2	2.848	0	2.848	0	2.848	0	2.848	0	2.848	0
2.848	0	2.847	0	2.848	1	2.847	0	2.848	0	2.848	0	2.848	0	2.848	0	2.848	0	2.847	1	2.848	0	2.844	0	2.844	0	2.852	0	2.852	1	2.852	0	2.852	0	2.852	0	2.852	0	2.852	0
2.852	0	2.851	0	2.852	1	2.851	0	2.852	0	2.852	0	2.852	0	2.852	0	2.852	0	2.851	1	2.852	0	2.848	0	2.848	0	2.856	0	2.856	1	2.856	0	2.856	0	2.856	0	2.856	0	2.856	0
2.856	0	2.855	0	2.856	1	2.855	0	2.856	0	2.856	0	2.856	0	2.856	0	2.856	0	2.855	1	2.856	0	2.852	0	2.852	0	2.86	0	2.86	0	2.86	0	2.86	0	2.86	0	2.86	0	2.86	0
2.86	0	2.859	0	2.86	1	2.859	0	2.86	0	2.86	0	2.86	0	2.86	0	2.86	0	2.859	1	2.86	0	2.856	0	2.855	0	2.864	0	2.864	0	2.864	0	2.864	0	2.864	0	2.864	0	2.864	0
2.864	0	2.864	0	2.864	1	2.863	0	2.864	0	2.864	0	2.864	0	2.864	0	2.864	0	2.863	1	2.864	0	2.86	0	2.859	0	2.868	0	2.868	0	2.868	0	2.868	0	2.868	0	2.868	0	2.868	0
2.868	0	2.867	0	2.868	0	2.867	0	2.868	0	2.868	0	2.868	0	2.868	0	2.868	0	2.867	0	2.868	0	2.864	0	2.863	0	2.872	0	2.872	0	2.872	0	2.872	0	2.872	0	2.872	0	2.872	0
2.872	0	2.871	0	2.872	0	2.871	0	2.872	0	2.872	0	2.872	0	2.872	0	2.872	0	2.871	0	2.872	0	2.868	0	2.868	0	2.876	0	2.876	0	2.876	0	2.876	0	2.876	0	2.876	0	2.876	0
2.876	0	2.875	0	2.876	0	2.875	1	2.876	0	2.876	0	2.876	0	2.876	0	2.876	0	2.875	0	2.876	0	2.872	0	2.872	1	2.88	0	2.88	0	2.88	0	2.88	0	2.88	0	2.88	0	2.88	0
2.88	0	2.879	2	2.88	0	2.879	4	2.88	0	2.88	0	2.88	0	2.88	0	2.88	0	2.879	2	2.88	0	2.876	0	2.876	1	2.884	0	2.884	0	2.884	0	2.884	0	2.884	0	2.884	0	2.884	0
2.884	0	2.883	10	2.884	0	2.883	13	2.884	0	2.884	0	2.884	0	2.884	0	2.884	0	2.883	28	2.884	0	2.88	0	2.88	1	2.888	0	2.888	0	2.888	0	2.888	0	2.888	0	2.888	0	2.888	0
2.888	0	2.888	28	2.888	0	2.887	24	2.888	0	2.888	0	2.888	0	2.888	0	2.888	0	2.887	84	2.888	13	2.884	0	2.884	0	2.892	0	2.892	1	2.892	0	2.892	0	2.892	0	2.892	0	2.892	0
2.892	0	2.892	56	2.892	0	2.891	35	2.892	0	2.892	0	2.892	0	2.892	0	2.892	0	2.891	174	2.892	62	2.888	0	2.888	0	2.896	0	2.896	1	2.896	4	2.896	0	2.896	0	2.896	0	2.896	2
2.896	0	2.896	104	2.896	0	2.895	49	2.896	0	2.896	0	2.896	0	2.896	0	2.896	0	2.895	319	2.896	134	2.892	6	2.892	0	2.9	0	2.9	2	2.9	13	2.9	0	2.9	0	2.9	0	2.9	5
2.9	0	2.899	171	2.9	0	2.899	63	2.9	0	2.9	0	2.9	3	2.9	0	2.9	6	2.899	561	2.9	242	2.896	27	2.896	0	2.904	0	2.904	2	2.904	24	2.904	0	2.904	0	2.904	0	2.904	10
2.904	0	2.903	240	2.904	0	2.903	77	2.904	0	2.904	0	2.904	7	2.904	0	2.904	17	2.903	1143	2.904	386	2.9	58	2.9	0	2.908	0	2.908	2	2.908	39	2.908	0	2.908	0	2.908	0	2.908	13
2.908	0	2.907	300	2.908	2	2.907	89	2.908	3	2.908	0	2.908	14	2.908	0	2.908	26	2.907	1848	2.908	622	2.904	88	2.904	0	2.912	0	2.912	3	2.912	56	2.912	0	2.912	0	2.912	0	2.912	16
2.912	0	2.911	350	2.912	6	2.911	98	2.912	6	2.912	0	2.912	22	2.912	0	2.912	37	2.911	2609	2.912	961	2.908	130	2.908	0	2.916	2	2.916	7	2.916	86	2.916	0	2.916	0	2.916	0	2.916	20
2.916	0	2.916	385	2.916	12	2.915	106	2.916	10	2.916	0	2.916	29	2.916	0	2.916	47	2.915	3337	2.916	1557	2.912	170	2.912	0	2.92	8	2.92	11	2.92	130	2.92	0	2.92	0	2.92	0	2.92	22
2.92	0	2.92	398	2.92	20	2.919	118	2.92	15	2.92	0	2.92	40	2.92	5	2.92	54	2.919	3840	2.92	2210	2.916	211	2.916	0	2.924	18	2.924	16	2.924	183	2.924	0	2.924	0	2.924	0	2.924	26
2.924	1	2.924	381	2.924	34	2.923	131	2.924	21	2.924	1	2.924	56	2.924	10	2.924	60	2.924	4018	2.924	2828	2.92	254	2.92	0	2.928	31	2.928	22	2.928	240	2.928	0	2.928	0	2.928	0	2.928	28
2.928	4	2.928	342	2.928	48	2.927	152	2.928	27	2.928	5	2.928	76	2.928	17	2.928	63	2.928	4012	2.928	3361	2.924	278	2.924	1	2.932	44	2.932	34	2.932	299	2.932	0	2.932	0	2.932	0	2.932	28
2.932	7	2.932	290	2.932	62	2.931	188	2.932	36	2.932	13	2.932	114	2.932	23	2.932	60	2.932	3612	2.932	3786	2.928	300	2.928	3	2.936	57	2.936	50	2.936	345	2.936	0	2.936	0	2.936	0	2.936	28
2.936	15	2.935	244	2.936	73	2.935	242	2.936	42	2.936	28	2.936	151	2.936	28	2.936	57	2.935	3033	2.936	3866	2.932	315	2.932	4	2.94	67	2.94	69	2.94	379	2.94	0	2.94	0	2.94	0	2.94	28
2.94	26	2.94	198	2.94	83	2.939	312	2.94	48	2.94	40	2.94	194	2.94	32	2.94	50	2.939	2345	2.94	3769	2.936	329	2.936	5	2.944	75	2.944	83	2.944	389	2.944	0	2.944	0	2.944	0	2.944	28
2.944	38	2.943	159	2.944	90	2.943	366	2.944	58	2.944	51	2.944	227	2.944	36	2.944	45	2.943	1638	2.944	3336	2.94	342	2.94	8	2.948	77	2.948	101	2.948	378	2.948	0	2.948	0	2.948	0	2.948	28
2.948	47	2.947	129	2.948	91	2.947	414	2.948	73	2.948	58	2.948	261	2.948	36	2.948	41	2.947	1107	2.948	2775	2.944	354	2.944	11	2.952	74	2.952	120	2.952	349	2.952	0	2.952	0	2.952	0	2.952	25
2.952	56	2.951	105	2.952	83	2.951	445	2.952	95	2.952	64	2.952	275	2.952	34	2.952	38	2.951	836	2.952	2188	2.948	359	2.948	14	2.956	67	2.956	135	2.956	309	2.956	0	2.956	0	2.956	0	2.956	22
2.956	63	2.956	85	2.956	79	2.955	458	2.956	123	2.956	68	2.956	280	2.956	31	2.956	31	2.955	645	2.956	1628	2.952	370	2.952	17	2.96	60	2.96	140	2.96	258	2.96	0	2.96	0	2.96	0	2.96	20
2.96	69	2.96	74	2.96	70	2.959	445	2.96	150	2.96	66	2.96	260	2.96	28	2.96	25	2.96	499	2.96	1125	2.956	384	2.956	23	2.964	52	2.964	140	2.964	213	2.964	0	2.964	0	2.964	0	2.964	20
2.964	69	2.964	66	2.964	63	2.963	409	2.964	176	2.964	58	2.964	234	2.964	25	2.964	22	2.964	402	2.964	860	2.96	405	2.96	31	2.968	47	2.968	134	2.968	178	2.968	0	2.968	0	2.968	0	2.968	17
2.968	64	2.968	60	2.968	53	2.967	347	2.968	197	2.968	51	2.968	200	2.968	25	2.968	20	2.968	327	2.968	664	2.964	417	2.964	40	2.972	41	2.972	128	2.972	152	2.972	0	2.972	0	2.972	0	2.972	14
2.972	60	2.971	50	2.972	44	2.971	295	2.972	210	2.972	46	2.972	174	2.972	23	2.972	18	2.971	274	2.972	529	2.968	434	2.968	50	2.976	35	2.976	115	2.976	129	2.976	0	2.976	0	2.976	0	2.976	12
2.976	57	2.976	43	2.976	40	2.975	240	2.976	214	2.976	42	2.976	141	2.976	19	2.976	15	2.976	234	2.976	423	2.972	464	2.972	58	2.98	30	2.98	97	2.98	109	2.98	0	2.98	0	2.98	0	2.98	11
2.98	50	2.979	38	2.98	35	2.979	194	2.98	203	2.98	39	2.98	119	2.98	16	2.98	15	2.979	198	2.98	352	2.976	493	2.976	65	2.984	26	2.984	82	2.984	92	2.984	0	2.984	0	2.984	0	2.984	9
2.984	43	2.983	33	2.984	28	2.983	159	2.984	183	2.984	33	2.984	99	2.984	15	2.984	13	2.983	168	2.984	298	2.98	524	2.98	67	2.988	21	2.988	70	2.988	80	2.988	0	2.988	0	2.988	0	2.988	8
2.988	38	2.987	32	2.988	24	2.987	130	2.988	162	2.988	29	2.988	85	2.988	13	2.988	12	2.987	146	2.988	256	2.984	566	2.984	66	2.992	17	2.992	58	2.992	70	2.992	0	2.992	0	2.992	0	2.992	7
2.992	34	2.992	27	2.992	20	2.991	105	2.992	139	2.992	25	2.992	75	2.992	12	2.992	11	2.992	129	2.992	227	2.988	662	2.988	64	2.996	13	2.996	47	2.996	58	2.996	0	2.996	0	2.996	0	2.996	8
2.996	28	2.996	23	2.996	17	2.995	86	2.996	117	2.996	21	2.996	66	2.996	11	2.996	9	2.996	114	2.996	201	2.992	843	2.992	59	3	11	3	39	3	48	3	0	3	0	3	0	3	8
3	24	3	23	3	16	2.999	75	3	98	3	19	3	56	3	9	3	9	3	100	3	179	2.996	1255	2.996	50	3.004	10	3.004	34	3.004	44	3.004	0	3.004	0	3.004	0	3.004	6
3.004	18	3.004	21	3.004	14	3.003	65	3.004	80	3.004	15	3.004	51	3.004	9	3.004	9	3.004	89	3.004	160	3	1749	3	43	3.008	8	3.008	32	3.008	39	3.008	0	3.008	0	3.008	0	3.008	6
3.008	16	3.008	20	3.008	14	3.007	59	3.008	71	3.008	13	3.008	45	3.008	10	3.008	7	3.007	83	3.008	144	3.004	2251	3.004	36	3.012	8	3.012	29	3.012	32	3.012	0	3.012	0	3.012	0	3.012	5
3.012	15	3.011	18	3.012	13	3.011	50	3.012	59	3.012	12	3.012	42	3.012	10	3.012	9	3.011	75	3.012	131	3.008	2688	3.008	33	3.016	6	3.016	27	3.016	29	3.016	0	3.016	0	3.016	0	3.016	4
3.016	11	3.015	15	3.016	12	3.015	43	3.016	49	3.016	11	3.016	37	3.016	8	3.016	9	3.015	69	3.016	120	3.012	2886	3.012	29	3.02	6	3.02	24	3.02	25	3.02	0	3.02	0	3.02	0	3.02	3
3.02	8	3.019	13	3.02	12	3.019	40	3.02	43	3.02	10	3.02	33	3.02	8	3.02	9	3.019	62	3.02	110	3.016	2959	3.016	23	3.024	6	3.024	21	3.024	25	3.024	0	3.024	0	3.024	0	3.024	3
3.024	8	3.023	13	3.024	12	3.023	39	3.024	37	3.024	8	3.024	30	3.024	6	3.024	9	3.023	60	3.024	102	3.02	2884	3.02	21	3.028	5	3.028	19	3.028	24	3.028	0	3.028	0	3.028	0	3.028	3
3.028	7	3.028	13	3.028	10	3.027	32	3.028	34	3.028	7	3.028	26	3.028	6	3.028	8	3.028	57	3.028	95	3.024	2531	3.024	19	3.032	5	3.032	17	3.032	20	3.032	0	3.032	0	3.032	0	3.032	3
3.032	5	3.032	12	3.032	7	3.031	30	3.032	30	3.032	6	3.032	23	3.032	6	3.032	8	3.032	51	3.032	90	3.028	2045	3.028	16	3.036	4	3.036	15	3.036	18	3.036	0	3.036	0	3.036	0	3.036	3
3.036	4	3.036	12	3.036	6	3.035	26	3.036	26	3.036	5	3.036	23	3.036	5	3.036	8	3.036	48	3.036	81	3.032	1530	3.032	15	3.04	3	3.04	14	3.04	19	3.04	0	3.04	0	3.04	0	3.04	2
3.04	3	3.04	12	3.04	7	3.039	24	3.04	25	3.04	6	3.04	21	3.04	4	3.04	6	3.04	48	3.04	77	3.036	1060	3.036	12	3.044	3	3.044	13	3.044	16	3.044	0	3.044	0	3.044	0	3.044	2
3.044	3	3.044	11	3.044	6	3.043	24	3.044	21	3.044	5	3.044	20	3.044	3	3.044	5	3.044	45	3.044	72	3.04	799	3.04	11	3.048	3	3.048	13	3.048	16	3.048	0	3.048	0	3.048	0	3.048	3
3.048	4	3.047	11	3.048	6	3.047	23	3.048	19	3.048	5	3.048	18	3.048	3	3.048	5	3.047	43	3.048	67	3.044	603	3.044	11	3.052	2	3.052	13	3.052	14	3.052	0	3.052	0	3.052	0	3.052	2
3.052	4	3.052	11	3.052	6	3.051	20	3.052	17	3.052	5	3.052	16	3.052	2	3.052	4	3.051	40	3.052	63	3.048	461	3.048	9	3.056	2	3.056	12	3.056	13	3.056	0	3.056	0	3.056	0	3.056	2
3.056	3	3.056	8	3.056	5	3.055	19	3.056	15	3.056	4	3.056	15	3.056	2	3.056	3	3.055	39	3.056	56	3.052	359	3.052	8	3.06	2	3.06	11	3.06	12	3.06	0	3.06	0	3.06	0	3.06	2
3.06	4	3.06	9	3.06	6	3.059	18	3.06	13	3.06	4	3.06	14	3.06	1	3.06	3	3.06	37	3.06	54	3.056	288	3.056	6	3.064	3	3.064	10	3.064	12	3.064	0	3.064	0	3.064	0	3.064	1
3.064	4	3.064	8	3.064	6	3.063	19	3.064	12	3.064	4	3.064	12	3.064	1	3.064	2	3.064	35	3.064	52	3.06	241	3.06	6	3.068	3	3.068	9	3.068	12	3.068	0	3.068	0	3.068	0	3.068	2
3.068	4	3.068	8	3.068	6	3.067	19	3.068	12	3.068	3	3.068	12	3.068	0	3.068	3	3.068	33	3.068	49	3.064	206	3.064	6	3.072	3	3.072	8	3.072	13	3.072	0	3.072	0	3.072	0	3.072	2
3.072	4	3.072	8	3.072	5	3.071	17	3.072	13	3.072	2	3.072	10	3.072	1	3.072	2	3.072	32	3.072	46	3.068	176	3.068	6	3.076	3	3.076	8	3.076	13	3.076	0	3.076	0	3.076	0	3.076	1
3.076	4	3.076	8	3.076	4	3.075	16	3.076	13	3.076	2	3.076	10	3.076	1	3.076	2	3.076	32	3.076	43	3.072	150	3.072	5	3.08	3	3.08	8	3.08	13	3.08	0	3.08	0	3.08	0	3.08	2
3.08	3	3.08	7	3.08	4	3.079	15	3.08	12	3.08	2	3.08	9	3.08	1	3.08	2	3.08	31	3.08	42	3.076	131	3.076	5	3.084	3	3.084	7	3.084	12	3.084	0	3.084	0	3.084	0	3.084	2
3.084	2	3.084	7	3.084	4	3.083	14	3.084	12	3.084	3	3.084	9	3.084	1	3.084	2	3.083	28	3.084	41	3.08	114	3.08	4	3.088	2	3.088	6	3.088	12	3.088	0	3.088	0	3.088	0	3.088	2
3.088	2	3.088	5	3.088	4	3.087	11	3.088	13	3.088	3	3.088	9	3.088	1	3.088	1	3.088	28	3.088	37	3.084	103	3.084	5	3.092	2	3.092	7	3.092	10	3.092	0	3.092	0	3.092	0	3.092	2
3.092	2	3.092	6	3.092	4	3.091	10	3.092	11	3.092	3	3.092	9	3.092	1	3.092	1	3.091	26	3.092	36	3.088	91	3.088	4	3.096	2	3.096	7	3.096	9	3.096	0	3.096	0	3.096	0	3.096	2
3.096	2	3.096	5	3.096	4	3.095	9	3.096	8	3.096	3	3.096	7	3.096	1	3.096	1	3.096	24	3.096	34	3.092	82	3.092	3	3.1	1	3.1	7	3.1	9	3.1	0	3.1	0	3.1	0	3.1	1
3.1	2	3.1	4	3.1	5	3.099	10	3.1	7	3.1	4	3.1	8	3.1	1	3.1	1	3.1	21	3.1	32	3.096	74	3.096	3	3.104	1	3.104	6	3.104	8	3.104	0	3.104	0	3.104	0	3.104	1
3.104	1	3.104	4	3.104	5	3.103	10	3.104	7	3.104	4	3.104	6	3.104	1	3.104	1	3.104	21	3.104	31	3.1	67	3.1	3	3.108	1	3.108	5	3.108	7	3.108	0	3.108	0	3.108	0	3.108	1
3.108	1	3.108	4	3.108	6	3.107	10	3.108	6	3.108	3	3.108	6	3.108	1	3.108	1	3.108	19	3.108	27	3.104	60	3.104	3	3.112	1	3.112	5	3.112	7	3.112	0	3.112	0	3.112	0	3.112	1
3.112	2	3.112	4	3.112	6	3.111	10	3.112	6	3.112	3	3.112	5	3.112	1	3.112	1	3.112	19	3.112	27	3.108	56	3.108	2	3.116	1	3.116	4	3.116	9	3.116	0	3.116	0	3.116	0	3.116	0
3.116	2	3.116	4	3.116	6	3.115	11	3.116	5	3.116	3	3.116	5	3.116	1	3.116	1	3.116	18	3.116	28	3.112	51	3.112	2	3.12	1	3.12	4	3.12	10	3.12	0	3.12	0	3.12	0	3.12	0
3.12	1	3.12	4	3.12	7	3.119	10	3.12	5	3.12	3	3.12	4	3.12	1	3.12	1	3.119	18	3.12	25	3.116	46	3.116	2	3.124	1	3.124	4	3.124	8	3.124	0	3.124	0	3.124	0	3.124	0
3.124	1	3.124	4	3.124	6	3.123	10	3.124	5	3.124	2	3.124	4	3.124	1	3.124	0	3.124	17	3.124	25	3.12	42	3.12	2	3.128	1	3.128	4	3.128	7	3.128	0	3.128	0	3.128	0	3.128	0
3.128	2	3.128	4	3.128	5	3.127	9	3.128	5	3.128	1	3.128	3	3.128	1	3.128	1	3.128	18	3.128	22	3.124	38	3.124	1	3.132	2	3.132	4	3.132	6	3.132	0	3.132	0	3.132	0	3.132	0
3.132	2	3.132	4	3.132	4	3.131	8	3.132	4	3.132	1	3.132	3	3.132	1	3.132	1	3.132	15	3.132	23	3.128	34	3.128	1	3.136	2	3.136	4	3.136	6	3.136	0	3.136	0	3.136	0	3.136	0
3.136	2	3.136	4	3.136	3	3.135	7	3.136	4	3.136	1	3.136	2	3.136	1	3.136	1	3.136	16	3.136	23	3.132	33	3.132	2	3.14	2	3.14	6	3.14	6	3.14	0	3.14	0	3.14	0	3.14	0
3.14	2	3.14	3	3.14	3	3.139	7	3.14	3	3.14	0	3.14	2	3.14	1	3.14	1	3.14	14	3.14	21	3.136	31	3.136	2	3.144	2	3.144	7	3.144	4	3.144	0	3.144	0	3.144	0	3.144	0
3.144	2	3.144	3	3.144	2	3.143	7	3.144	3	3.144	0	3.144	3	3.144	1	3.144	1	3.144	13	3.144	18	3.14	29	3.14	2	3.148	2	3.148	6	3.148	4	3.148	0	3.148	0	3.148	0	3.148	0
3.148	2	3.148	3	3.148	1	3.148	5	3.148	3	3.148	0	3.148	4	3.148	1	3.148	1	3.148	13	3.148	18	3.144	27	3.144	2	3.152	2	3.152	5	3.152	3	3.152	0	3.152	0	3.152	0	3.152	0
3.152	2	3.152	3	3.152	1	3.151	4	3.152	3	3.152	0	3.152	3	3.152	1	3.152	1	3.152	13	3.152	17	3.148	28	3.148	2	3.156	2	3.156	4	3.156	4	3.156	0	3.156	0	3.156	0	3.156	0
3.156	2	3.156	3	3.156	1	3.155	4	3.156	3	3.156	0	3.156	3	3.156	1	3.156	1	3.156	14	3.156	17	3.152	27	3.152	2	3.16	1	3.16	4	3.16	4	3.16	0	3.16	0	3.16	0	3.16	0
3.16	2	3.16	3	3.16	1	3.159	3	3.16	3	3.16	0	3.16	3	3.16	2	3.16	1	3.16	14	3.16	15	3.156	25	3.156	1	3.164	1	3.164	4	3.164	3	3.164	0	3.164	0	3.164	0	3.164	0
3.164	2	3.164	2	3.164	1	3.163	3	3.164	3	3.164	0	3.164	4	3.164	1	3.164	0	3.164	14	3.164	15	3.16	24	3.16	0	3.168	1	3.168	3	3.168	3	3.168	0	3.168	0	3.168	0	3.168	0
3.168	1	3.168	3	3.168	1	3.167	3	3.168	2	3.168	0	3.168	4	3.168	2	3.168	0	3.168	14	3.168	16	3.164	22	3.164	0	3.172	1	3.172	3	3.172	4	3.172	0	3.172	0	3.172	0	3.172	0
3.172	1	3.172	3	3.172	1	3.171	3	3.172	2	3.172	0	3.172	3	3.172	2	3.172	0	3.172	14	3.172	15	3.168	22	3.168	1	3.176	1	3.176	3	3.176	4	3.176	0	3.176	0	3.176	0	3.176	0
3.176	1	3.176	3	3.176	1	3.175	4	3.176	2	3.176	0	3.176	2	3.176	2	3.176	0	3.176	13	3.176	15	3.172	19	3.172	1	3.18	1	3.18	3	3.18	3	3.18	0	3.18	0	3.18	0	3.18	0
3.18	1	3.18	2	3.18	1	3.179	4	3.18	2	3.18	0	3.18	2	3.18	2	3.18	0	3.18	12	3.18	16	3.176	17	3.176	1	3.184	1	3.184	3	3.184	3	3.184	0	3.184	0	3.184	0	3.184	0
3.184	1	3.184	2	3.184	1	3.184	4	3.184	2	3.184	0	3.184	3	3.184	1	3.184	0	3.184	12	3.184	16	3.18	16	3.18	1	3.188	1	3.188	3	3.188	2	3.188	0	3.188	0	3.188	0	3.188	0
3.188	1	3.188	2	3.188	1	3.188	3	3.188	2	3.188	0	3.188	3	3.188	1	3.188	0	3.188	11	3.188	16	3.184	15	3.184	2	3.192	1	3.192	2	3.192	2	3.192	0	3.192	0	3.192	0	3.192	0
3.192	1	3.192	2	3.192	0	3.191	3	3.192	2	3.192	0	3.192	3	3.192	1	3.192	0	3.192	10	3.192	16	3.188	15	3.188	2	3.196	1	3.196	3	3.196	2	3.196	0	3.196	0	3.196	0	3.196	0
3.196	1	3.196	1	3.196	0	3.195	4	3.196	2	3.196	0	3.196	2	3.196	0	3.196	0	3.196	9	3.196	14	3.192	15	3.192	2	3.2	0	3.2	3	3.2	2	3.2	0	3.2	0	3.2	0	3.2	0
3.2	1	3.2	0	3.2	0	3.199	3	3.2	2	3.2	0	3.2	2	3.2	0	3.2	0	3.2	9	3.2	14	3.196	14	3.196	1	3.204	0	3.204	2	3.204	2	3.204	0	3.204	0	3.204	0	3.204	0
3.204	1	3.204	1	3.204	0	3.203	3	3.204	2	3.204	0	3.204	3	3.204	0	3.204	0	3.204	9	3.204	15	3.2	13	3.2	1	3.208	0	3.208	2	3.208	2	3.208	0	3.208	0	3.208	0	3.208	0
3.208	1	3.208	1	3.208	0	3.207	3	3.208	2	3.208	0	3.208	3	3.208	0	3.208	0	3.208	9	3.208	14	3.204	12	3.204	1	3.212	0	3.212	2	3.212	2	3.212	0	3.212	0	3.212	0	3.212	0
3.212	1	3.212	0	3.212	1	3.211	3	3.212	2	3.212	0	3.212	2	3.212	0	3.212	0	3.212	7	3.212	14	3.208	12	3.208	1	3.216	0	3.216	2	3.216	2	3.216	0	3.216	0	3.216	0	3.216	0
3.216	0	3.216	0	3.216	1	3.216	2	3.216	2	3.216	0	3.216	3	3.216	0	3.216	0	3.216	6	3.216	13	3.212	12	3.212	0	3.22	0	3.22	2	3.22	2	3.22	0	3.22	0	3.22	0	3.22	0
3.22	0	3.22	1	3.22	1	3.22	2	3.22	2	3.22	0	3.22	3	3.22	0	3.22	0	3.22	6	3.22	13	3.216	11	3.216	0	3.224	0	3.224	2	3.224	2	3.224	0	3.224	0	3.224	0	3.224	0
3.224	0	3.224	1	3.224	2	3.224	1	3.224	2	3.224	0	3.224	3	3.224	0	3.224	0	3.224	8	3.224	14	3.22	11	3.22	0	3.228	0	3.228	2	3.228	2	3.228	0	3.228	0	3.228	0	3.228	0
3.228	0	3.228	1	3.228	1	3.227	1	3.228	3	3.228	0	3.228	3	3.228	0	3.228	0	3.228	9	3.228	13	3.224	11	3.224	1	3.232	0	3.232	2	3.232	1	3.232	0	3.232	0	3.232	0	3.232	0
3.232	0	3.232	1	3.232	2	3.231	1	3.232	2	3.232	0	3.232	3	3.232	0	3.232	0	3.232	8	3.232	11	3.228	12	3.228	1	3.236	0	3.236	2	3.236	2	3.236	0	3.236	0	3.236	0	3.236	0
3.236	0	3.236	1	3.236	2	3.235	1	3.236	2	3.236	0	3.236	3	3.236	0	3.236	0	3.236	9	3.236	11	3.232	11	3.232	0	3.24	0	3.24	1	3.24	1	3.24	0	3.24	0	3.24	0	3.24	0
3.24	0	3.24	2	3.24	2	3.239	2	3.24	1	3.24	0	3.24	2	3.24	0	3.24	0	3.24	10	3.24	11	3.236	11	3.236	1	3.244	0	3.244	1	3.244	1	3.244	0	3.244	0	3.244	0	3.244	0
3.244	0	3.244	2	3.244	2	3.243	2	3.244	1	3.244	0	3.244	2	3.244	0	3.244	0	3.244	10	3.244	12	3.24	10	3.24	1	3.248	0	3.248	1	3.248	2	3.248	0	3.248	0	3.248	0	3.248	0
3.248	1	3.248	1	3.248	2	3.247	2	3.248	0	3.248	0	3.248	1	3.248	0	3.248	1	3.248	10	3.248	11
