# Supplementary material for: Metabolite exchange between microbiome members produces compounds that influence Drosophila behavior
Source: eLife. 2017 Jan 9;6:e18855. doi: 10.7554/eLife.18855 (PMC5222558; doi:10.7554/eLife.18855)
Supplement: Figure 5—source data 1. — DOI: http://dx.doi.org/10.7554/eLife.18855.037 [file elife-18855-fig5-data1.xlsx]

## Sheet: chromats
RT	scamlp	scam	sc	am	ajm	blank6
0.002	637	662	659	625	608	701
0.006	649	660	689	677	613	625
0.01	645	660	648	659	636	661
0.014	673	682	596	633	623	609
0.018	700	661	700	592	647	619
0.022	626	695	632	691	655	651
0.026	585	659	615	651	590	661
0.03	648	629	653	690	643	658
0.034	612	595	656	697	589	657
0.038	657	668	641	648	598	627
0.042	647	673	718	646	629	619
0.046	662	672	624	611	645	621
0.05	621	644	713	653	597	598
0.054	625	677	710	628	600	606
0.058	625	640	673	663	605	648
0.062	695	677	742	656	608	636
0.066	653	654	678	658	586	658
0.07	613	698	675	648	594	644
0.074	613	681	690	663	585	607
0.078	688	657	689	650	641	640
0.082	697	708	714	652	630	647
0.086	642	681	684	678	630	607
0.09	699	706	706	678	573	545
0.094	653	618	681	693	609	629
0.098	643	677	671	661	630	560
0.102	616	686	700	631	617	627
0.106	692	667	688	619	605	601
0.11	714	651	638	697	592	618
0.114	693	706	702	728	631	618
0.118	750	629	686	637	641	607
0.122	643	695	653	631	646	632
0.126	673	728	693	622	635	611
0.13	683	650	646	693	618	610
0.134	651	719	648	659	616	650
0.138	692	681	682	655	648	617
0.142	657	716	617	629	619	679
0.146	691	676	726	665	602	604
0.15	704	687	678	657	605	663
0.154	705	675	695	634	603	613
0.158	673	701	662	676	615	630
0.162	661	691	693	636	635	633
0.166	668	684	632	712	607	612
0.17	622	668	711	622	634	682
0.174	678	680	705	691	687	604
0.178	687	707	642	674	672	648
0.182	662	649	680	680	636	698
0.186	636	706	659	678	627	632
0.19	665	715	701	671	624	642
0.194	715	721	708	691	694	625
0.198	715	662	653	655	646	682
0.202	682	672	693	670	616	631
0.206	671	678	659	721	714	659
0.21	624	690	683	632	594	608
0.214	664	765	688	722	627	623
0.218	636	708	627	729	657	706
0.222	653	696	692	672	634	627
0.226	649	701	641	688	611	697
0.23	692	732	687	654	597	650
0.234	637	648	651	671	645	674
0.238	647	710	661	653	662	634
0.242	681	724	656	645	651	637
0.246	709	699	665	681	613	597
0.25	634	654	669	678	645	628
0.254	714	736	714	684	633	618
0.258	624	721	698	694	665	585
0.262	702	700	684	655	654	658
0.266	644	707	703	652	685	659
0.27	705	730	669	636	655	647
0.274	674	667	648	714	649	634
0.278	666	704	667	664	666	634
0.282	752	737	635	680	636	635
0.286	729	698	640	668	626	629
0.29	635	711	665	709	672	657
0.294	625	667	703	661	665	636
0.298	681	711	695	681	609	612
0.302	625	685	720	721	638	679
0.306	713	683	736	680	620	651
0.31	670	729	681	672	625	644
0.314	708	743	718	722	628	686
0.318	734	731	666	679	631	632
0.322	651	769	680	656	692	661
0.326	688	714	675	702	615	656
0.33	688	677	697	681	642	682
0.334	680	700	728	647	662	645
0.338	681	716	658	667	665	666
0.342	689	711	692	702	654	634
0.346	681	680	712	639	646	639
0.35	700	651	671	724	591	606
0.354	716	815	670	692	684	621
0.358	679	643	686	698	688	556
0.362	691	681	669	677	644	656
0.366	629	708	668	695	627	654
0.37	722	692	690	660	608	687
0.374	642	688	624	677	675	625
0.378	703	681	724	635	625	634
0.382	688	717	700	661	650	682
0.386	647	713	694	647	617	641
0.39	677	697	661	687	676	642
0.394	708	687	666	673	696	663
0.398	703	679	667	642	698	647
0.402	693	683	649	693	676	650
0.406	694	770	710	655	699	642
0.41	634	634	704	695	669	696
0.414	668	730	662	658	683	650
0.418	718	706	684	623	659	633
0.422	718	648	711	611	611	649
0.426	644	653	684	727	654	636
0.43	666	670	650	726	625	636
0.434	684	701	684	695	598	625
0.438	656	676	711	662	660	671
0.442	713	668	689	630	659	677
0.446	713	656	746	700	635	638
0.451	710	712	719	631	666	652
0.454	678	734	656	689	656	664
0.458	747	625	713	691	609	662
0.462	706	690	696	652	682	629
0.466	711	737	700	701	670	595
0.47	678	729	699	689	662	650
0.474	639	700	703	701	665	583
0.478	661	734	702	676	659	659
0.483	689	662	662	675	622	614
0.486	654	733	697	696	652	630
0.491	699	699	672	645	660	658
0.494	700	717	677	680	601	705
0.498	686	704	720	651	645	672
0.502	696	723	701	709	689	609
0.506	665	660	647	674	670	674
0.51	695	761	670	644	625	605
0.514	616	748	699	649	658	669
0.518	699	689	684	690	638	706
0.523	686	704	699	657	725	677
0.526	681	722	734	666	630	682
0.53	684	705	651	665	646	618
0.534	685	712	730	666	706	700
0.538	643	671	694	724	647	672
0.542	664	729	629	646	685	631
0.546	708	758	666	644	671	679
0.551	648	678	652	638	705	652
0.555	687	735	714	684	641	659
0.559	659	720	699	680	721	611
0.563	653	719	662	652	602	673
0.567	651	704	625	647	619	691
0.57	620	723	716	701	627	633
0.574	698	723	655	707	646	616
0.578	709	678	664	650	600	616
0.582	689	722	671	680	651	689
0.587	669	700	688	630	655	636
0.591	693	704	700	635	659	615
0.595	703	701	725	675	626	643
0.599	643	713	705	677	656	641
0.603	726	740	740	672	611	602
0.606	665	708	698	664	670	661
0.61	651	727	671	635	644	660
0.615	672	710	724	710	684	687
0.619	681	657	627	671	664	630
0.623	667	724	697	740	678	659
0.627	750	690	642	661	597	611
0.631	652	767	683	681	655	620
0.635	649	685	707	668	654	657
0.638	704	691	684	681	648	659
0.643	633	675	682	649	683	621
0.647	659	677	711	681	611	664
0.651	671	712	641	737	675	621
0.655	628	715	694	704	677	623
0.659	666	760	725	658	627	653
0.663	730	714	651	703	670	663
0.667	670	676	690	672	627	616
0.671	707	670	742	674	659	618
0.675	669	699	664	642	702	572
0.679	647	697	667	657	654	644
0.683	701	657	644	673	657	632
0.687	655	731	743	657	651	635
0.691	726	740	687	675	693	651
0.695	613	662	662	679	621	649
0.699	705	713	673	731	651	642
0.703	647	673	699	634	669	668
0.707	722	741	709	664	633	641
0.711	689	706	711	671	622	617
0.715	669	718	714	699	604	628
0.719	664	685	707	634	653	629
0.723	695	734	719	669	674	602
0.727	692	704	741	685	657	649
0.731	613	725	676	674	632	615
0.735	640	668	718	685	663	664
0.739	709	729	672	691	650	667
0.743	747	737	680	679	672	689
0.747	706	724	712	682	623	639
0.751	656	712	685	702	681	689
0.755	651	711	665	614	652	606
0.759	635	684	685	684	676	622
0.763	669	740	705	674	661	557
0.767	663	727	671	734	633	671
0.771	592	732	659	638	684	617
0.775	711	676	690	686	658	675
0.779	679	720	696	628	669	605
0.783	677	698	660	651	637	683
0.787	678	717	704	676	665	626
0.791	649	705	681	696	683	642
0.795	753	692	668	683	670	638
0.799	669	704	663	708	667	619
0.803	697	734	682	626	627	623
0.807	687	701	653	649	659	652
0.811	714	738	681	674	645	705
0.815	663	734	732	674	592	635
0.819	664	729	715	705	665	631
0.823	674	723	646	638	673	654
0.827	662	712	659	651	586	699
0.831	719	707	724	669	666	652
0.835	668	660	692	725	645	625
0.839	681	693	673	636	666	705
0.843	677	743	661	669	635	646
0.847	701	670	750	696	693	635
0.851	604	703	680	639	683	678
0.855	700	748	731	679	631	673
0.859	703	689	712	671	656	623
0.863	676	718	659	693	645	616
0.867	703	680	739	680	650	676
0.871	657	680	665	717	661	621
0.875	649	649	702	711	663	597
0.879	668	711	683	637	646	666
0.883	653	698	684	668	588	650
0.887	625	663	681	694	627	650
0.891	667	703	676	675	638	633
0.895	698	751	620	656	607	612
0.899	707	688	686	670	646	627
0.903	657	690	680	696	610	598
0.907	692	663	682	690	667	613
0.911	736	720	663	672	618	677
0.915	685	707	733	676	636	681
0.919	656	698	662	687	657	629
0.923	649	715	680	692	621	621
0.927	704	727	692	659	633	632
0.931	663	747	736	658	647	577
0.935	658	679	681	701	650	633
0.939	644	746	641	734	589	607
0.943	677	737	688	688	648	709
0.947	663	727	668	694	640	621
0.951	631	710	736	683	638	637
0.955	655	664	730	713	659	632
0.959	672	720	669	639	632	648
0.963	719	639	718	660	637	646
0.967	604	718	671	751	663	636
0.971	719	700	689	687	709	704
0.975	638	695	727	645	593	649
0.979	720	652	689	629	639	655
0.983	661	669	636	677	622	639
0.987	711	686	655	635	679	650
0.991	719	762	683	672	660	695
0.995	661	675	728	718	618	660
0.999	689	742	711	678	619	626
1.003	709	719	669	673	634	665
1.007	698	701	713	637	645	651
1.011	677	723	693	633	682	607
1.015	697	687	711	673	699	642
1.019	692	715	694	685	616	631
1.023	680	735	696	696	668	653
1.027	662	745	674	660	661	684
1.031	684	682	686	703	689	616
1.035	654	713	641	668	644	661
1.039	703	714	688	680	668	636
1.043	696	756	659	675	679	715
1.047	683	696	719	687	627	644
1.051	660	711	740	653	634	632
1.055	682	768	725	697	614	718
1.059	710	694	651	627	618	706
1.063	703	661	721	653	658	678
1.067	669	626	671	687	630	625
1.071	657	709	728	617	583	658
1.075	686	693	636	707	627	641
1.079	682	759	688	703	643	639
1.083	644	667	665	645	643	643
1.087	630	717	728	681	605	664
1.091	695	729	691	713	631	619
1.095	681	700	676	686	628	667
1.099	704	702	738	661	667	609
1.103	700	686	706	676	703	647
1.107	689	702	693	715	659	648
1.111	675	647	711	702	603	625
1.115	682	717	698	673	642	639
1.119	693	709	681	729	631	641
1.123	690	699	731	634	651	623
1.127	700	615	658	716	671	708
1.131	691	684	764	716	695	661
1.135	674	690	767	700	598	659
1.139	686	722	691	670	644	610
1.143	660	737	673	719	655	633
1.147	654	695	729	662	687	655
1.151	642	663	682	650	670	636
1.155	699	699	663	705	692	609
1.159	686	706	670	715	650	643
1.163	687	664	696	687	597	670
1.167	676	707	696	647	621	640
1.171	643	695	693	673	630	626
1.175	728	709	677	677	646	614
1.179	642	629	711	672	621	612
1.183	710	695	717	685	647	652
1.187	712	694	683	686	690	668
1.191	741	662	689	647	659	673
1.195	653	701	641	694	624	637
1.199	714	678	666	670	618	610
1.203	662	683	708	744	610	651
1.207	683	689	685	671	620	607
1.211	704	710	691	699	673	611
1.215	654	666	686	674	692	699
1.219	717	664	739	667	620	618
1.223	636	704	695	629	622	556
1.227	679	734	693	683	634	628
1.231	677	726	602	650	620	595
1.235	685	719	618	648	623	654
1.239	633	712	750	736	657	634
1.243	653	709	688	649	686	609
1.247	651	699	762	644	715	654
1.251	672	740	940	670	618	635
1.255	658	711	1395	687	635	613
1.259	696	713	2325	1077	671	609
1.263	699	737	2780	2774	707	710
1.267	983	939	2914	9726	883	798
1.271	1558	1561	6206	14479	1471	1398
1.275	2404	2556	8248	17470	2363	2172
1.279	4931	6117	8692	21479	5123	4899
1.283	7348	8726	7267	23486	7012	7282
1.287	9800	9747	5295	20022	8109	8759
1.291	8842	8502	3637	12558	6907	8031
1.295	4763	4791	2852	7312	4135	5309
1.299	3239	3488	2176	3594	3015	1992
1.303	2727	2848	2029	2672	2647	1249
1.307	2566	2478	1776	2174	2394	1103
1.311	2131	2263	1803	2036	2105	1113
1.315	2011	2115	2262	1869	1920	995
1.319	1875	1919	3294	1723	1764	992
1.323	1793	1797	4628	1624	1710	966
1.327	1818	1871	4752	1669	1739	966
1.331	1990	1934	4964	1753	1617	884
1.335	2407	2539	6672	1924	1644	837
1.339	2964	3299	8477	1793	1692	747
1.343	3857	4546	8589	1831	1657	781
1.347	4977	5483	6438	2057	1664	760
1.351	5072	4827	3866	1887	1725	859
1.355	3771	3528	2306	1892	1685	793
1.359	2598	2563	1620	1687	1696	849
1.363	1903	2054	1425	1699	1620	868
1.367	1753	1800	1328	1808	1571	786
1.371	1710	1764	1489	1820	1574	728
1.375	1682	1773	8372	1713	1393	740
1.379	1803	1623	205286	1665	1302	710
1.383	1680	1754	382958	1536	1192	693
1.387	1808	1662	40453	1456	1114	674
1.391	2018	3157	40136	1423	998	691
1.395	20192	79819	450728	1346	803	714
1.399	25113	204401	445123	1339	818	726
1.403	148546	286258	464722	1211	992	654
1.407	133569	320778	589142	1090	1332	654
1.411	138137	347722	482302	985	1792	715
1.415	127754	361711	40365	1006	2791	603
1.419	173002	355276	618258	1131	3504	693
1.423	173474	311320	292472	1226	3290	765
1.427	79769	224539	159517	1107	2373	884
1.431	14406	140508	65905	904	1765	926
1.435	11223	66140	30527	857	1197	881
1.439	6807	29619	17876	758	958	817
1.443	4323	14365	13017	709	757	782
1.447	3031	4304	10382	687	732	799
1.451	2375	3168	4432	690	678	754
1.455	1855	2566	3832	663	706	778
1.459	1679	2267	3585	635	623	761
1.463	1461	2008	3040	663	569	753
1.467	1279	1723	2672	651	577	721
1.471	1223	1664	2465	604	566	713
1.475	1159	1484	2462	677	613	719
1.479	1106	1577	2374	677	762	722
1.483	1101	1526	2340	736	672	720
1.487	1137	1413	2235	836	728	660
1.491	1108	1431	2133	946	702	716
1.495	1043	1395	1998	972	769	728
1.499	1023	1341	1959	964	831	819
1.503	964	1193	2004	846	758	832
1.507	919	1070	1823	723	638	908
1.511	834	1036	1627	685	593	871
1.515	811	1007	1429	649	596	821
1.519	844	1015	1412	589	577	815
1.523	774	903	1291	630	569	815
1.527	707	947	1251	585	520	713
1.531	733	917	1204	550	487	745
1.535	745	838	1133	547	449	719
1.539	710	916	1212	553	513	728
1.543	751	849	1229	551	461	696
1.547	682	806	1258	530	508	668
1.551	715	831	1152	565	481	678
1.555	719	914	1143	704	502	685
1.559	1017	1041	1237	791	557	728
1.563	2008	1842	1225	939	803	719
1.567	3557	3571	1109	1268	1007	644
1.571	5690	5199	1063	1304	988	680
1.575	11647	5431	1024	1107	852	687
1.579	10441	4507	966	909	707	710
1.583	3950	3245	917	728	628	710
1.587	2313	2010	930	690	576	759
1.591	1500	1381	961	668	562	1036
1.595	1091	1110	942	689	596	1428
1.599	882	942	867	701	663	1677
1.603	807	896	883	628	573	1604
1.607	709	797	803	596	551	1324
1.611	729	800	778	560	522	965
1.615	686	826	812	508	485	801
1.619	660	825	824	517	529	732
1.623	658	764	848	475	418	655
1.627	634	770	854	561	485	692
1.631	659	715	815	501	487	669
1.635	618	711	803	522	471	586
1.639	625	714	845	499	485	698
1.643	643	732	916	514	518	678
1.647	581	676	1111	531	467	593
1.651	584	646	1380	510	515	644
1.655	560	726	1435	559	453	674
1.659	615	704	1650	503	466	592
1.663	597	679	1908	530	477	663
1.667	643	737	1963	567	529	682
1.671	689	845	1742	519	519	649
1.675	787	1024	1601	557	510	716
1.679	851	1127	1337	505	484	704
1.683	807	1084	1132	596	552	665
1.687	810	957	1013	569	496	657
1.691	748	907	958	605	496	652
1.695	714	828	899	567	555	697
1.699	713	777	890	616	574	703
1.703	817	849	849	662	581	719
1.707	784	824	806	662	591	788
1.711	703	796	815	641	637	808
1.715	625	726	828	616	570	793
1.719	597	674	748	537	520	762
1.723	637	689	737	538	502	718
1.727	741	644	698	547	484	715
1.731	753	642	650	531	503	652
1.735	819	634	716	510	497	649
1.739	921	615	700	599	504	686
1.743	919	656	673	539	472	678
1.747	883	623	704	509	506	649
1.751	755	650	693	512	496	667
1.755	716	620	682	501	486	644
1.759	708	638	735	506	391	694
1.763	621	675	661	504	466	610
1.767	697	667	663	467	499	624
1.771	645	664	731	514	499	666
1.775	612	675	699	512	467	723
1.779	727	634	684	538	470	696
1.783	733	562	694	561	495	672
1.787	664	687	752	530	508	696
1.791	641	2583	809	510	466	674
1.795	613	3545	875	558	489	611
1.799	722	4425	887	555	476	720
1.803	2220	5296	887	606	505	634
1.807	3430	6414	2281	580	515	628
1.811	4221	10394	1956	569	503	751
1.815	5041	11190	1592	540	566	748
1.819	5650	12148	1506	512	520	708
1.823	9722	14014	1384	501	535	701
1.827	11108	18648	1349	545	515	710
1.831	12350	20319	1277	478	498	715
1.835	13523	25868	1258	484	532	657
1.839	14702	27529	1209	472	468	606
1.843	18632	29343	1261	504	496	641
1.847	20483	32273	1208	517	464	654
1.851	26200	34815	1113	577	513	656
1.855	28293	35928	1106	626	543	774
1.859	29662	38613	1062	761	628	785
1.863	30627	42008	975	759	569	881
1.867	34057	44976	1001	817	562	837
1.871	36324	47369	946	741	560	821
1.875	38836	49043	978	635	541	801
1.879	42081	53427	915	699	537	744
1.883	43706	54878	916	633	506	667
1.887	45698	57443	997	608	494	624
1.891	48663	64105	898	598	500	711
1.895	53476	68779	917	569	503	679
1.899	54916	72082	902	530	530	646
1.903	56611	75816	850	577	508	630
1.907	61090	82635	876	615	511	651
1.911	65267	88497	875	572	493	627
1.915	76131	118404	898	580	523	680
1.919	131868	264211	1035	554	539	598
1.923	291777	458514	1118	538	522	697
1.927	458254	573605	1288	562	527	663
1.931	386677	443009	1480	552	500	625
1.935	244889	616539	1493	501	473	634
1.939	418248	444793	1443	501	496	631
1.943	588674	439889	1230	595	500	686
1.947	561098	650387	1120	556	453	680
1.951	436900	375462	1045	555	513	661
1.955	292827	396337	1011	577	481	637
1.959	124151	251202	958	613	563	656
1.963	55474	189620	906	639	506	677
1.967	123723	171967	855	540	507	640
1.971	121219	168429	803	557	547	654
1.975	123253	170060	862	506	549	630
1.979	124776	172066	845	554	501	622
1.983	128207	178670	763	613	505	626
1.987	132503	181297	817	539	532	676
1.991	139381	185054	791	568	544	654
1.995	139586	195682	825	521	527	681
1.999	143491	192425	999	568	469	682
2.003	151882	200787	3502	574	479	669
2.007	156459	205324	9635	539	502	702
2.011	159645	207278	31322	512	548	700
2.015	165819	211036	49812	495	536	690
2.019	170004	216522	75206	516	474	658
2.023	175039	224129	96815	536	537	686
2.027	180866	154354	102607	550	503	698
2.031	188390	275457	88426	568	500	666
2.035	195826	246672	63653	556	555	667
2.039	211983	254270	35857	598	507	679
2.043	218182	261381	13071	589	460	651
2.047	222595	262573	8636	586	518	698
2.051	220134	259798	6255	552	498	671
2.055	221945	259173	4573	584	514	682
2.059	221475	261680	3469	589	558	692
2.063	216112	263913	2754	614	580	695
2.067	229722	268304	2341	656	610	751
2.071	230317	273032	2045	617	595	762
2.075	230041	276851	1890	662	636	670
2.079	235455	278055	1676	689	568	659
2.083	245977	280865	1498	653	493	665
2.087	249964	286644	1421	637	503	622
2.091	251045	289842	1432	622	541	636
2.095	250799	292822	1258	582	540	652
2.099	254723	298922	1325	629	556	653
2.103	263597	286638	1248	596	518	635
2.107	270118	287489	1193	646	503	642
2.111	273952	305827	1167	560	562	679
2.115	278016	309825	1035	533	489	629
2.119	283342	311464	1075	618	456	670
2.123	283051	315165	1053	570	528	662
2.127	284225	321888	1089	544	536	661
2.131	286746	324194	1056	581	502	633
2.135	292485	326914	1099	659	529	653
2.139	295162	329398	1102	583	538	679
2.143	296721	330941	1092	572	458	619
2.147	301695	334106	1026	647	495	676
2.151	220021	336553	1072	644	510	655
2.155	224141	199964	1058	738	534	660
2.159	309909	48755	990	869	502	635
2.163	314344	32104	981	979	585	673
2.167	312876	21211	1007	982	711	644
2.171	317938	15069	903	921	719	679
2.175	322037	12706	895	842	701	633
2.179	326156	11014	921	776	703	637
2.183	329975	9756	857	729	666	671
2.187	330744	6975	884	699	627	640
2.191	334344	6323	860	624	608	632
2.195	335248	6202	888	645	568	663
2.199	336349	5753	833	655	578	638
2.203	436080	5390	878	632	510	631
2.207	231068	5161	932	588	565	698
2.211	201538	4893	856	597	528	631
2.215	341967	4677	898	606	506	650
2.219	346763	4632	809	584	552	686
2.223	491357	4372	872	617	560	639
2.227	351997	4248	891	593	525	593
2.231	355030	4162	847	609	538	598
2.235	358676	3956	902	636	514	666
2.239	382040	3866	828	570	528	723
2.243	652368	3863	850	602	539	720
2.247	320555	3655	902	617	512	670
2.251	188012	3596	918	620	550	687
2.255	97416	3433	1099	618	555	660
2.259	39084	3370	1336	623	506	762
2.263	28444	3248	1619	559	523	682
2.267	20052	3202	1946	588	503	670
2.271	14439	3113	2326	545	472	616
2.275	12476	3030	2416	598	514	621
2.279	10955	3130	2357	644	517	628
2.283	10523	3013	1952	578	529	605
2.287	10030	3048	1538	600	602	618
2.291	6780	2932	1234	612	662	665
2.295	6319	3005	1129	629	843	677
2.299	6140	3005	944	656	917	682
2.303	5718	2811	951	662	901	607
2.307	5322	2673	848	608	735	694
2.311	4840	2728	864	632	748	626
2.315	4758	2599	825	615	642	663
2.319	4653	2554	867	623	620	617
2.323	4413	2564	893	602	638	628
2.327	4324	2544	931	597	601	641
2.331	4097	2473	915	588	500	610
2.335	4071	2526	985	610	554	655
2.339	3937	2427	1018	591	541	703
2.343	3801	2337	1146	561	575	715
2.347	3783	2348	1394	656	571	689
2.351	3756	2367	1522	582	512	662
2.355	3580	2413	1765	568	535	664
2.359	3414	2288	1916	650	526	709
2.363	3488	2285	1934	663	607	706
2.367	3388	2213	1826	559	588	709
2.371	3504	2350	1743	603	1151	751
2.375	3183	2377	1434	636	1509	670
2.379	3174	2302	1267	631	1635	710
2.383	3101	2304	1088	716	1687	762
2.387	3133	2274	1026	652	1506	693
2.391	3001	2179	901	661	1381	755
2.395	2953	2137	820	624	1223	730
2.399	2840	2057	844	625	1056	691
2.403	2649	2076	930	598	968	704
2.407	2674	2046	885	623	926	658
2.411	2620	2033	909	609	798	656
2.415	2609	1994	846	614	885	675
2.419	2537	1990	849	609	800	700
2.423	2617	1979	857	596	847	622
2.427	2538	1988	795	586	756	625
2.431	2562	1905	754	648	734	611
2.435	2554	1921	806	600	708	658
2.439	2348	1844	801	591	690	688
2.443	2552	1857	782	613	704	698
2.447	2403	1827	809	578	658	661
2.451	2426	1856	812	572	681	621
2.455	2348	1862	826	589	638	661
2.459	2383	1822	771	625	637	655
2.463	2371	1886	773	613	677	691
2.467	2327	1889	749	622	669	628
2.471	2357	1819	719	627	624	655
2.475	2211	1797	717	625	718	746
2.479	2291	1870	754	609	652	736
2.483	2261	1791	758	628	667	724
2.487	2223	1919	767	646	632	691
2.491	2069	1752	741	595	613	617
2.495	2161	1734	725	555	642	674
2.499	2138	1697	767	620	575	648
2.503	2158	1685	714	606	633	610
2.507	2149	1741	700	567	579	675
2.512	2135	1729	724	614	622	626
2.516	2107	1700	812	564	539	633
2.52	1988	1733	767	575	632	603
2.523	2128	1703	644	546	618	657
2.527	2075	1687	714	575	656	685
2.531	2110	1661	718	609	578	611
2.535	1993	1655	692	559	576	631
2.54	1931	1578	688	587	544	583
2.544	2071	1692	738	569	586	635
2.548	2063	1667	699	633	538	615
2.552	1972	1581	705	593	581	644
2.556	1890	1656	746	602	603	633
2.56	1790	1505	731	594	539	698
2.563	1841	1582	706	584	585	636
2.567	1835	1545	760	573	549	649
2.571	1790	1601	723	591	614	602
2.576	1745	1600	700	577	547	630
2.58	1757	1540	722	577	533	636
2.584	1826	1480	751	579	560	666
2.588	1808	1525	710	578	578	695
2.592	1789	1519	757	617	542	617
2.596	1843	1565	809	607	613	689
2.599	1746	1644	722	660	614	655
2.604	1747	1537	815	596	551	599
2.608	1726	1558	839	608	574	642
2.612	1773	1563	835	636	603	654
2.616	1778	1512	801	683	599	665
2.62	1794	1516	856	692	613	653
2.624	1798	1563	2138	781	543	666
2.628	1742	1488	2677	870	606	668
2.632	1713	1497	2671	897	606	708
2.636	1697	1716	2467	926	585	600
2.64	1731	1706	2237	832	536	657
2.644	1623	1678	2216	840	592	674
2.648	1552	1534	2013	787	587	645
2.652	1691	1580	1961	791	546	684
2.656	1575	1595	1727	837	605	677
2.66	1711	1605	1742	939	658	609
2.664	1657	1619	1591	2176	586	678
2.668	1622	1630	1508	2362	628	657
2.672	1594	2080	1432	2323	589	671
2.676	1698	2355	1396	2314	657	702
2.68	1540	2488	1286	2130	612	622
2.684	1748	2448	1217	2021	580	625
2.688	1907	2330	1270	1928	597	660
2.692	1931	2179	1199	1733	572	693
2.696	1745	2125	1222	1592	547	660
2.7	1782	2126	1086	1533	585	617
2.704	1899	1963	1087	1488	622	687
2.708	1720	2012	1049	1337	522	640
2.712	1780	1934	1062	1353	546	645
2.716	1727	1829	1024	1271	594	676
2.72	1713	1821	1080	1154	602	723
2.724	2139	1740	1078	1175	591	789
2.728	2660	1794	1085	1182	570	675
2.732	2686	1749	1054	1203	588	733
2.736	2693	1630	1016	1083	567	737
2.74	2610	1608	919	1114	658	735
2.744	2389	1626	962	950	693	730
2.748	2419	1606	982	1088	735	738
2.752	2210	1519	907	997	743	769
2.756	2264	1563	948	1066	815	771
2.76	2155	1574	1001	998	787	775
2.764	2001	1632	989	1009	804	654
2.768	1950	1611	1061	1027	849	718
2.772	1973	1556	937	984	858	771
2.776	1998	1546	930	958	876	762
2.78	2006	1583	853	959	910	776
2.784	1994	1565	888	1021	914	778
2.788	1868	1486	887	941	904	846
2.792	1768	1482	873	944	847	816
2.796	1668	1446	881	907	844	761
2.8	1730	1437	812	858	858	802
2.804	1679	1390	826	874	787	820
2.808	1655	1435	843	864	803	736
2.812	1722	1395	818	855	785	769
2.816	1646	1394	860	892	821	794
2.82	1612	1407	789	894	789	704
2.824	1637	1309	840	881	801	827
2.828	1650	1340	758	871	854	790
2.832	1574	1378	744	845	834	732
2.836	1617	1347	743	790	801	749
2.84	1625	1299	728	869	884	733
2.844	1535	1284	755	786	773	738
2.848	1451	1328	798	731	808	784
2.852	1454	1246	739	720	828	758
2.856	1528	1313	748	780	862	727
2.86	1583	1348	683	833	791	737
2.864	1568	1269	689	715	774	709
2.868	1600	1252	746	759	782	695
2.872	1467	1325	722	766	826	754
2.876	1571	1253	725	784	760	694
2.88	1442	1250	739	812	748	788
2.884	1512	1249	732	737	788	706
2.888	1492	1309	717	757	746	735
2.892	1547	1232	739	709	776	762
2.896	1551	1317	718	710	750	744
2.9	1532	1259	692	738	760	650
2.904	2000	1253	659	668	754	660
2.908	3199	1266	772	712	709	731
2.912	3917	1178	814	683	755	667
2.916	4549	1231	864	687	763	632
2.92	4837	1242	847	688	665	668
2.924	5073	1281	1069	725	706	685
2.928	5327	1259	1022	706	694	680
2.932	5627	1328	1106	713	732	669
2.936	5755	1407	1152	691	672	654
2.94	6008	1435	1280	717	688	706
2.944	6162	1542	1310	695	752	716
2.948	6297	1701	1309	800	714	724
2.952	6337	1853	1357	783	692	699
2.956	6520	1770	1318	798	686	744
2.96	6637	1819	1324	807	739	704
2.964	6816	1946	1340	808	737	669
2.968	7149	2105	1392	764	726	688
2.972	7163	2360	1395	737	723	680
2.976	7749	2548	1300	768	690	759
2.98	7907	2750	1123	783	684	752
2.984	8378	2810	1084	765	728	691
2.988	8900	3147	1001	804	745	726
2.992	14726	3427	932	819	637	746
2.996	17475	3683	961	869	708	733
3	24075	3614	925	898	731	708
3.004	33860	3388	894	879	735	745
3.008	47303	2976	818	848	735	766
3.012	56216	2605	948	823	720	715
3.016	58246	2273	845	766	637	642
3.02	54024	1970	831	730	702	749
3.024	43482	1825	870	652	672	665
3.028	33327	1712	808	618	684	638
3.032	25549	1598	837	687	650	701
3.036	19860	1548	806	659	699	701
3.04	14951	1497	778	616	692	705
3.044	8537	1384	817	670	652	668
3.048	7317	1385	804	651	656	683
3.052	6251	1393	832	631	573	689
3.056	5744	1392	765	619	700	649
3.06	5038	1339	756	603	619	647
3.064	4750	1373	766	603	637	655
3.068	4263	1245	746	662	611	686
3.072	3738	1265	737	680	669	724
3.076	3723	1319	774	607	652	690
3.08	3486	1244	756	625	681	705
3.084	3331	1289	704	641	664	657
3.088	3090	1243	795	673	604	668
3.092	2953	1313	720	652	657	686
3.096	2819	1267	683	690	638	647
3.1	2663	1203	745	637	630	702
3.104	2620	1212	743	641	560	733
3.108	2424	1197	741	657	639	690
3.112	2581	1250	723	642	592	689
3.116	2394	1248	723	646	611	675
3.12	2303	1173	685	636	660	712
3.124	2359	1161	734	604	624	675
3.128	2241	1171	732	650	584	662
3.132	2180	1147	738	596	630	706
3.136	2015	1169	751	612	590	669
3.14	1994	1134	731	640	622	670
3.144	2066	1136	675	587	641	646
3.148	1897	1166	768	608	598	679
3.152	2066	1116	705	601	575	646
3.156	1864	1164	693	589	566	645
3.16	1941	1209	726	642	653	608
3.164	1845	1122	715	635	609	675
3.168	1838	1092	727	666	649	602
3.172	1820	1159	704	655	602	656
3.176	1763	1117	756	630	647	633
3.18	1782	1117	713	625	615	689
3.184	1735	1070	773	683	670	662
3.188	1753	1198	753	602	594	636
3.192	1720	1131	716	586	609	705
3.196	1666	1136	816	701	633	680
3.2	1781	1188	818	676	674	745
3.204	1752	1178	915	672	643	719
3.208	1705	1153	1043	693	639	810
3.212	1688	1096	1240	622	637	711
3.216	1843	1183	1373	701	633	767
3.22	2144	1159	1614	609	627	705
3.224	2794	1406	1710	677	601	695
3.228	3637	1612	1831	633	568	696
3.232	4372	1885	1777	657	583	665
3.236	4936	2010	1835	622	586	690
3.24	4990	2101	1720	598	611	686
3.244	4550	1993	1626	616	626	689
3.248	3752	1805	1522	644	561	664
3.252	3188	1679	1640	596	550	663
3.256	2565	1515	1803	654	591	647
3.26	2164	1339	1897	631	635	667
3.264	1804	1319	1956	619	614	665
3.268	1781	1176	1959	654	619	642
3.272	1522	1139	1774	602	603	647
3.276	1569	1147	1699	626	562	663
3.28	1488	1164	1542	636	593	602
3.284	1500	1064	1391	609	640	625
3.288	1481	1110	1292	650	586	638
3.292	1452	1100	1168	617	620	582
3.296	1517	1052	1099	652	599	652
3.3	1468	1126	1047	622	611	643
3.304	1494	1138	996	607	602	701
3.308	1405	1061	902	627	610	613
3.312	1421	1067	933	651	611	629
3.316	1397	1115	909	626	620	625
3.32	1430	1241	886	591	615	640
3.324	1445	1176	858	623	623	620
3.328	1518	1145	928	610	585	586
3.332	1413	1144	1872	627	651	658
3.336	1427	1175	11748	621	540	666
3.34	1427	1147	36052	640	591	644
3.344	1410	1223	69267	610	572	661
3.348	1405	1123	136118	633	600	689
3.352	1356	1085	208484	596	634	638
3.356	1337	1064	270349	645	662	660
3.36	1438	1058	247817	595	652	634
3.364	1377	1079	369748	568	668	678
3.368	1388	1085	217914	619	674	642
3.372	1349	1268	235711	650	727	637
3.376	1409	4442	479386	601	706	603
3.38	2041	20427	492745	646	691	638
3.384	6385	46194	485025	702	769	676
3.388	21087	97482	381883	718	728	626
3.392	39201	150278	439773	735	723	668
3.396	65786	145979	371657	739	741	675
3.4	88931	242325	421043	688	705	671
3.404	102650	257115	272796	647	724	598
3.408	103783	238947	141915	643	692	661
3.412	76906	197172	71814	644	708	640
3.416	64210	141531	41769	615	674	665
3.42	49776	94918	32728	644	645	698
3.424	35656	51318	33171	659	674	652
3.428	25346	32299	41185	659	602	682
3.432	17868	23027	66671	631	724	709
3.436	12641	16934	101023	601	716	636
3.44	8329	10412	143372	621	813	649
3.444	6774	8952	191736	613	826	622
3.448	5684	7890	234955	597	777	627
3.452	5139	7311	259677	682	767	625
3.456	5815	8973	257341	656	751	690
3.46	8647	20532	224528	644	826	610
3.464	20533	38885	173842	681	751	647
3.468	39180	65687	118730	640	753	620
3.472	61910	90851	73581	661	864	664
3.476	81284	108568	45023	703	1128	637
3.48	94462	112389	30705	717	1877	618
3.484	97982	103752	21892	840	2615	641
3.488	87408	85163	16262	895	3113	636
3.492	71298	65187	10030	972	3259	664
3.496	52242	44929	8960	1085	3126	666
3.5	38251	32035	7670	1172	2985	647
3.504	24104	20262	6967	1179	2636	632
3.508	13959	11871	6489	1146	2432	662
3.512	10624	9353	6089	1091	2294	665
3.516	8041	7317	5568	1014	1935	700
3.52	6856	6221	5339	1012	1747	656
3.524	5742	5534	4759	889	1618	688
3.528	4875	4751	4708	863	1421	648
3.532	4308	4352	4369	857	1437	685
3.536	3889	4010	4164	806	1325	639
3.54	3573	3729	4040	748	1219	653
3.544	3249	3399	3818	782	1121	584
3.548	3061	3185	3807	780	1058	657
3.552	2900	3041	3598	806	1057	623
3.556	2837	2938	3354	786	1020	631
3.56	2638	2755	3280	724	998	675
3.564	2575	2669	3239	754	956	642
3.568	2476	2566	3001	681	951	644
3.572	2326	2508	2977	728	855	643
3.576	2265	2413	2832	738	844	625
3.58	2169	2361	2830	681	819	664
3.584	2168	2274	2819	699	797	629
3.588	2051	2191	2726	685	815	613
3.592	1947	2056	2611	651	807	711
3.596	1929	2154	2564	725	801	624
3.6	1838	2014	2590	674	788	655
3.604	1846	1919	2446	611	747	634
3.608	1892	2018	2349	611	728	644
3.612	1804	1860	2414	682	731	656
3.616	1820	1861	2486	664	726	645
3.62	1743	1721	2296	623	778	671
3.624	1732	1875	2349	612	741	629
3.628	1787	1786	2222	621	700	622
3.632	1636	1774	2189	652	726	640
3.636	1684	1752	2190	703	720	643
3.64	1571	1758	2086	586	699	628
3.644	1618	1718	2005	695	702	678
3.648	1653	1646	2010	652	693	668
3.652	1500	1603	2025	681	676	612
3.656	1589	1670	1856	666	727	625
3.66	1529	1610	1925	617	699	607
3.664	1559	1514	1895	617	680	602
3.668	1544	1554	1921	614	626	662
3.672	1500	1606	1878	616	663	670
3.676	1526	1525	1820	658	686	632
3.68	1560	1525	1843	687	657	721
3.684	1528	1515	1703	613	674	657
3.688	1533	1533	1700	629	701	696
3.692	1450	1458	1763	575	689	643
3.696	1315	1510	1750	684	675	609
3.7	1372	1484	1694	626	705	604
3.704	1467	1450	1724	618	694	679
3.708	1425	1424	1625	636	630	631
3.712	1412	1479	1652	635	609	632
3.716	1343	1578	1680	644	711	632
3.72	1376	1546	1588	599	636	657
3.724	1440	1618	1584	758	675	643
3.728	1481	1725	1562	695	641	638
3.732	1508	1723	1540	724	685	620
3.736	1501	1813	1546	741	641	644
3.74	1590	1797	1589	711	626	691
3.744	1600	1785	1528	708	681	616
3.748	1667	1847	1597	683	660	642
3.752	1661	1867	1522	748	646	645
3.756	1642	1774	1562	707	666	648
3.76	1770	1811	1461	696	596	627
3.764	1765	1691	1581	694	619	593
3.768	1783	1620	1502	695	613	651
3.772	1696	1588	1555	729	660	646
3.776	1777	1537	1497	715	617	678
3.78	1724	1545	1529	643	672	635
3.784	1618	1470	1435	673	647	655
3.788	1710	1464	1462	658	681	624
3.792	1623	1461	1452	645	613	599
3.796	1615	1553	1444	620	603	678
3.8	1544	1452	1369	728	660	629
3.804	1475	1443	1413	708	621	694
3.808	1605	1424	1489	719	637	622
3.812	1462	1425	1404	797	604	550
3.816	1469	1430	1325	940	617	630
3.82	1449	1283	1481	1008	606	668
3.824	1409	1343	1414	1105	620	634
3.828	1416	1379	1328	1152	614	658
3.832	1321	1312	1257	1159	576	602
3.836	1401	1285	1312	1231	615	611
3.84	1339	1286	1360	1310	634	628
3.844	1295	1391	1372	1254	674	651
3.848	1355	1524	1333	1420	583	625
3.852	1359	1534	1386	1460	610	634
3.856	1373	1631	1437	1524	589	636
3.86	1433	1595	1495	1538	625	637
3.864	1574	1703	1488	1625	674	656
3.868	1628	1794	1575	1562	722	680
3.872	1601	1744	1561	1641	672	651
3.876	1737	1843	1462	1647	748	644
3.88	1850	1954	1429	1688	679	616
3.884	1789	2092	1442	1824	757	633
3.888	1855	1978	1464	1794	711	648
3.892	1891	1868	1391	1913	732	633
3.896	1960	1757	1383	1912	734	626
3.9	2122	1636	1273	2053	769	644
3.904	2292	1611	1335	2007	757	628
3.908	2385	1566	1247	2071	738	606
3.912	2415	1585	1325	2099	761	632
3.916	2462	1577	1341	2195	764	599
3.92	2562	1514	1358	2318	748	619
3.924	2539	1481	1338	2356	739	632
3.928	2654	1448	1596	2286	722	665
3.932	2650	1441	1771	2330	752	623
3.936	2692	1409	2093	2425	732	624
3.94	2697	1437	2445	2476	772	653
3.944	2655	1388	2852	2371	741	637
3.948	2847	1453	3100	1930	746	615
3.952	2733	1355	3086	1599	727	697
3.956	2780	1334	2938	1438	763	606
3.96	2914	1370	2533	1312	699	624
3.964	2880	1322	2210	1220	729	632
3.968	3110	1412	1932	1150	671	616
3.972	3110	1368	1595	1160	739	646
3.976	3238	1345	1520	1119	743	666
3.98	3263	1354	1395	1023	711	644
3.984	3390	1402	1334	1129	725	646
3.988	3470	1380	1285	1023	743	636
3.992	3301	1273	1272	1067	779	585
3.996	3341	1316	1248	1035	757	622
4	3556	1264	1254	979	738	604
4.004	3499	1376	1203	968	753	626
4.008	3589	1331	1219	957	677	628
4.012	2987	1332	1250	938	659	638
4.016	2653	1192	1230	932	729	620
4.02	2257	1223	1217	946	729	598
4.024	2274	1153	1311	931	727	662
4.028	2010	1266	1133	855	740	640
4.032	1959	1258	1181	916	851	616
4.036	1798	1214	1214	859	725	648
4.04	1848	1229	1231	950	727	635
4.044	1831	1286	1246	901	737	651
4.048	1791	1120	1197	943	702	633
4.052	1742	1158	1224	864	720	608
4.056	1791	1244	1236	910	693	634
4.06	1743	1186	1330	894	733	602
4.064	1767	1147	1227	876	723	704
4.068	1812	1164	1235	891	769	644
4.072	1699	1222	1235	913	791	696
4.076	1694	1230	1220	845	791	659
4.08	1683	1234	1242	944	771	644
4.084	1720	1247	1219	922	766	642
4.088	1655	1145	1131	951	758	663
4.092	1559	1207	1173	993	813	640
4.096	1638	1301	1078	981	785	611
4.1	1613	1267	1194	966	779	680
4.104	1564	1265	1118	1018	774	639
4.108	1587	1222	1180	960	735	664
4.112	1523	1178	1053	899	749	667
4.116	1469	1177	1075	962	740	683
4.12	1448	1135	1033	881	701	660
4.124	1493	1172	1000	887	693	662
4.128	1446	1078	1062	916	661	682
4.132	1446	1169	1110	873	728	695
4.136	1423	1153	1155	853	663	603
4.14	1332	1165	1087	884	699	576
4.144	1355	1148	1097	870	690	678
4.148	1389	1108	1097	833	672	637
4.152	1437	1073	1046	777	670	607
4.156	1390	1122	1050	797	664	646
4.16	1416	1119	1131	818	751	674
4.164	1402	1057	1122	828	694	660
4.168	1336	1081	1157	813	728	627
4.172	1307	1109	1063	826	634	630
4.176	1338	1145	1111	795	702	621
4.18	1368	1057	1048	791	684	640
4.184	1280	1092	1105	785	657	618
4.188	1317	1043	1126	799	672	652
4.192	1254	1120	1147	793	653	661
4.196	1313	1004	1138	743	699	647
4.2	1280	1090	1001	757	658	639
4.204	1338	1083	1131	786	704	669
4.208	1180	1028	1062	813	659	654
4.212	1251	1074	1037	789	671	620
4.216	1281	1075	1073	765	668	646
4.22	1304	1021	1125	756	694	659
4.224	1237	1094	1057	779	692	626
4.228	1263	1062	1024	773	690	596
4.232	1215	1057	1008	765	636	655
4.236	1183	1000	1059	719	660	631
4.24	1263	1041	1032	785	667	604
4.244	1245	1053	963	796	691	650
4.248	1263	1030	1025	819	699	629
4.252	1266	1138	961	747	658	628
4.256	1170	1063	1056	745	676	631
4.26	1208	1060	994	724	626	613
4.264	1195	1034	992	731	711	634
4.268	1169	1066	1048	739	639	672
4.272	1210	1077	994	759	705	570
4.276	1213	1066	1021	728	641	685
4.28	1265	1115	1001	728	720	670
4.284	1555	1333	956	739	688	629
4.288	2580	2122	938	772	674	682
4.292	4954	3918	942	743	676	655
4.296	9313	7478	912	736	645	659
4.3	20340	16192	906	765	681	633
4.305	33049	25449	1012	761	684	604
4.308	44193	34310	944	734	627	660
4.312	53789	40409	940	807	665	606
4.316	58413	75531	938	707	691	627
4.32	58870	43764	996	659	681	649
4.325	54821	40096	943	719	682	678
4.329	32951	33020	932	695	668	601
4.333	26122	25518	945	650	666	644
4.337	27409	19142	858	751	679	622
4.34	20180	14427	870	726	668	619
4.344	14140	7954	935	764	673	654
4.348	7904	5865	967	737	622	646
4.352	5852	4430	904	768	695	641
4.357	4379	3503	896	694	616	612
4.361	3514	2813	844	680	651	645
4.365	2809	2285	944	727	650	655
4.369	2419	2085	863	777	640	557
4.373	2230	1797	881	730	661	650
4.377	1949	1668	862	680	628	630
4.381	1801	1534	838	732	664	590
4.385	1742	1430	920	749	671	562
4.389	1689	1392	925	726	641	637
4.393	1553	1334	876	702	665	619
4.397	1495	1322	892	742	654	640
4.401	1488	1327	909	701	675	670
4.405	1458	1210	908	737	658	653
4.409	1505	1218	959	691	569	592
4.413	1392	1110	911	719	653	634
4.417	1401	1144	903	766	667	648
4.421	1358	1174	894	744	679	674
4.425	1305	1133	914	700	649	615
4.429	1295	1182	919	680	660	588
4.433	1302	1098	879	737	651	698
4.437	1259	1121	818	729	636	663
4.441	1181	1111	891	717	692	586
4.445	1204	1012	929	688	616	655
4.449	1279	1022	888	749	628	670
4.453	1206	1020	935	663	635	622
4.457	1156	1063	890	705	618	611
4.461	1207	1051	810	702	679	612
4.465	1244	1068	902	705	651	652
4.469	1125	1023	869	699	687	613
4.473	1180	1075	940	726	614	643
4.477	1172	1010	845	705	648	621
4.481	1146	1046	860	717	607	649
4.485	1131	1058	812	713	611	652
4.489	1022	987	891	768	653	625
4.493	1058	1030	843	674	632	614
4.497	1048	1026	883	738	715	661
4.501	1140	927	858	679	697	623
4.505	1188	1028	802	747	662	601
4.509	1106	1005	877	765	692	657
4.513	1100	956	915	708	660	629
4.517	1082	943	805	732	688	619
4.521	1086	987	841	723	664	577
4.525	1122	964	836	790	663	630
4.529	1076	1013	867	661	683	632
4.533	1028	1051	878	719	643	642
4.537	1092	1034	836	706	647	669
4.541	1018	909	872	733	653	621
4.545	1070	1000	873	741	673	673
4.549	1065	983	870	754	672	658
4.553	1074	944	884	684	695	677
4.557	1097	981	794	707	607	594
4.561	976	1056	889	733	610	658
4.565	1017	944	855	666	628	618
4.569	1132	1004	878	718	597	600
4.573	1161	1043	895	764	623	636
4.577	1132	941	863	686	640	630
4.581	1099	1014	794	775	666	608
4.585	1104	1020	827	694	663	632
4.589	1048	1004	775	739	632	645
4.593	1051	948	814	680	660	687
4.597	1119	915	878	776	628	633
4.601	1024	1055	844	751	616	621
4.605	1081	962	855	701	629	661
4.609	1031	986	866	710	586	662
4.613	1037	925	872	728	674	632
4.617	999	875	802	695	638	600
4.621	988	940	851	756	601	587
4.625	1045	921	823	720	614	608
4.629	1014	955	883	741	654	669
4.633	980	944	849	739	633	628
4.637	963	945	864	733	641	617
4.641	1036	1004	881	791	648	606
4.645	966	928	870	734	642	612
4.649	1105	938	890	733	642	626
4.653	1046	957	1038	720	587	616
4.657	1017	981	997	739	632	616
4.661	959	1007	1002	765	682	607
4.665	1043	957	1013	754	630	641
4.669	969	1001	1066	790	635	650
4.673	990	1245	1083	722	654	629
4.677	1069	1287	1089	748	618	639
4.681	2040	1410	1047	725	686	660
4.685	2583	1447	1037	779	644	635
4.689	2730	1437	1088	769	606	669
4.693	2801	1421	1047	789	687	632
4.697	2837	1460	1044	633	667	610
4.701	2734	1427	1067	730	595	672
4.705	2827	1475	997	730	609	661
4.709	2687	1393	1036	735	683	604
4.713	2711	1293	1034	694	609	638
4.717	2616	1369	1012	709	641	632
4.721	2617	1294	1102	673	647	635
4.725	2663	1347	1048	727	655	521
4.729	2607	1358	1015	730	637	607
4.733	2633	1369	1022	698	656	619
4.737	2492	1294	1007	712	635	638
4.741	2479	1257	1024	727	675	628
4.745	2410	1234	1087	670	632	595
4.749	2312	1275	1046	786	590	660
4.753	2208	1188	1056	707	654	630
4.757	2179	1262	1020	750	659	580
4.761	2179	1225	1103	717	625	631
4.765	2129	1250	1028	743	670	635
4.769	2032	1202	1031	744	615	584
4.773	1959	1232	1025	768	619	659
4.777	2050	1188	1079	733	629	645
4.781	1867	1234	1030	743	617	604
4.785	1924	1198	1026	712	654	571
4.789	1766	1212	1018	741	633	625
4.793	1723	1160	1028	735	656	576
4.797	1727	1214	1016	698	659	613
4.801	1694	1212	1068	760	609	639
4.805	1737	1196	988	823	633	610
4.809	1671	1206	1051	774	626	588
4.813	1653	1173	966	775	668	656
4.817	1586	1202	937	759	653	653
4.821	1673	1121	944	769	640	618
4.825	1617	1134	1029	751	645	673
4.829	1546	1112	1022	819	628	575
4.833	1531	1175	883	814	654	601
4.837	1582	1164	1005	807	673	667
4.841	1528	1035	925	738	701	622
4.845	1535	1088	937	822	700	639
4.849	1401	1102	979	832	688	640
4.853	1507	1143	931	805	654	613
4.857	1460	1071	897	805	635	617
4.861	1535	1109	864	832	635	628
4.865	1426	1066	927	765	687	693
4.869	1497	1038	914	769	640	630
4.873	1473	1033	920	848	684	598
4.877	1418	1092	882	822	701	677
4.881	1396	1081	945	792	619	667
4.885	1384	1095	926	775	650	655
4.889	1290	979	908	679	685	629
4.893	1357	1078	930	780	640	600
4.897	1334	1037	963	719	667	667
4.901	1324	1067	904	736	632	634
4.905	1376	992	886	758	570	701
4.909	1380	972	862	688	621	652
4.913	1374	994	922	671	633	622
4.917	1323	1059	942	691	558	634
4.921	1397	1003	856	751	648	637
4.925	1286	1032	889	689	673	618
4.929	1280	1034	929	746	603	634
4.933	1302	999	940	695	621	652
4.937	1248	1036	892	685	647	668
4.941	1178	1068	815	723	629	602
4.945	1263	1014	893	716	624	617
4.949	1294	955	909	665	572	624
4.953	1317	1095	830	681	658	623
4.957	1263	979	905	702	593	603
4.961	1290	1017	914	685	608	618
4.965	1273	1005	894	689	597	635
4.969	1216	988	934	766	643	639
4.973	1196	952	929	643	663	596
4.977	1277	1000	903	673	598	591
4.981	1162	999	907	731	608	668
4.985	1131	940	897	677	632	592
4.989	1150	1006	912	676	595	621
4.993	1251	941	887	746	587	662
4.997	1192	878	875	686	606	608
5.001	1233	992	978	702	616	690
5.005	1198	998	895	676	624	622
5.009	1188	1037	946	727	638	626
5.013	1184	983	949	650	671	614
5.017	1170	922	987	727	637	648
5.021	1181	967	958	769	595	637
5.025	1097	1077	934	669	591	628
5.029	1176	982	963	675	649	641
5.033	1113	1038	945	656	582	624
5.037	1177	962	936	651	616	660
5.041	1102	997	951	678	599	605
5.045	1156	1038	878	675	625	615
5.049	1190	975	1073	665	622	650
5.053	1178	999	915	643	612	609
5.057	1205	989	1011	702	622	628
5.061	1145	994	934	701	615	637
5.065	1150	1053	990	680	631	596
5.069	1199	1071	924	692	596	660
5.073	1175	1030	905	693	637	631
5.077	1133	1028	959	693	647	601
5.081	1220	1052	934	646	602	643
5.085	1139	1019	928	718	614	614
5.089	1222	1042	974	703	631	677
5.093	1194	1082	947	695	603	600
5.097	1166	1096	956	752	583	632
5.101	1171	1057	965	733	632	644
5.105	1206	1061	907	678	611	654
5.109	1239	1077	935	700	648	644
5.113	1332	1042	917	658	604	637
5.117	1233	1057	931	726	615	594
5.121	1307	1065	949	698	630	607
5.125	1163	1096	942	692	620	629
5.129	1266	1101	887	745	596	640
5.133	1265	1073	931	711	584	619
5.137	1296	1043	922	727	570	670
5.141	1313	1013	962	686	581	627
5.145	1283	1051	915	723	665	617
5.149	1326	1098	872	690	662	608
5.153	1310	1030	963	746	670	633
5.157	1293	1071	932	691	688	621
5.161	1299	1015	989	719	626	575
5.165	1337	1011	933	708	673	659
5.169	1284	1055	934	732	666	628
5.173	1290	1042	973	708	710	618
5.177	1300	1069	989	678	646	650
5.181	1209	1045	907	702	643	614
5.185	1241	1019	982	673	630	629
5.189	1189	1060	974	704	641	599
5.193	1216	1094	969	675	604	593
5.197	1284	1060	918	683	655	584
5.201	1166	1020	951	687	616	679
5.205	1158	1039	910	664	637	575
5.209	1204	935	903	687	654	619
5.213	1201	974	908	746	625	635
5.217	1239	1035	916	710	624	650
5.221	1198	959	887	669	667	561
5.225	1192	958	890	685	631	634
5.229	1244	943	890	707	673	614
5.233	1171	959	874	667	616	614
5.237	1223	924	916	703	695	614
5.241	1171	1006	910	715	648	651
5.245	1106	992	845	666	632	618
5.249	1143	946	916	664	615	637
5.253	1146	993	835	646	611	606
5.257	1172	937	916	669	592	600
5.261	1129	963	822	671	622	625
5.265	1090	941	850	673	683	683
5.269	1117	980	905	647	620	616
5.273	1085	937	807	660	594	588
5.277	1035	964	895	660	594	670
5.281	1033	874	909	621	619	619
5.285	1070	912	850	648	656	645
5.289	1052	938	848	720	635	610
5.293	1036	940	877	630	584	596
5.297	1008	922	862	653	685	642
5.301	1077	877	852	592	598	677
5.305	1032	908	839	700	600	631
5.309	1075	933	848	751	581	629
5.313	995	913	887	706	619	603
5.317	1012	847	878	659	581	614
5.321	1064	977	858	682	639	603
5.325	1067	932	813	691	596	615
5.329	1036	909	773	657	573	659
5.333	987	890	855	692	590	617
5.337	987	910	778	676	639	619
5.341	1019	855	782	679	600	602
5.345	950	905	890	643	608	569
5.349	1012	891	852	630	647	649
5.353	1033	902	746	689	619	628
5.357	1031	941	832	662	643	611
5.361	1016	884	902	666	603	635
5.365	999	941	838	677	578	590
5.369	1005	961	821	688	592	627
5.373	997	882	862	671	600	604
5.377	1027	982	789	674	606	586
5.381	1034	888	770	635	590	617
5.385	966	891	851	698	623	633
5.389	1013	902	827	659	567	606
5.393	994	872	818	672	548	638
5.397	983	935	878	652	628	560
5.401	1016	913	839	691	581	588
5.405	914	883	847	635	608	656
5.409	991	945	838	593	595	596
5.413	1001	856	770	674	567	579
5.417	888	847	807	690	609	601
5.421	1014	910	823	646	605	597
5.425	1019	879	774	643	621	601
5.429	992	829	823	657	602	628
5.433	910	937	819	663	572	634
5.437	940	886	823	659	577	611
5.441	971	870	828	675	557	603
5.445	1013	830	841	633	592	615
5.449	946	887	793	678	600	594
5.453	939	943	821	684	641	600
5.457	962	892	829	663	589	592
5.461	939	852	814	646	617	607
5.465	936	974	803	632	599	599
5.469	990	854	802	692	636	571
5.473	961	938	845	676	565	562
5.477	960	863	779	639	555	573
5.481	943	899	823	724	634	586
5.485	916	864	831	631	617	604
5.489	923	847	780	649	591	597
5.493	952	942	797	606	579	634
5.497	976	853	807	654	602	579
5.501	1008	904	805	700	548	561
5.505	933	846	766	657	621	591
5.509	943	848	766	637	570	587
5.513	942	860	846	690	590	602
5.517	1024	880	790	690	618	653
5.521	939	931	794	687	639	551
5.525	1000	873	774	634	598	624
5.529	951	907	736	661	563	623
5.533	965	887	797	643	604	644
5.537	968	855	764	655	626	600
5.541	952	817	797	691	656	612
5.545	973	904	796	675	594	595
5.549	929	832	797	643	572	647
5.553	853	816	809	654	558	601
5.557	924	900	807	680	607	617
5.561	889	880	797	613	631	598
5.565	937	854	770	650	617	597
5.569	975	827	808	575	596	653
5.573	945	862	761	684	615	604
5.577	902	874	814	679	553	601
5.581	894	853	837	601	605	604
5.585	1018	823	775	672	607	563
5.589	902	818	808	663	593	638
5.593	909	895	769	667	622	607
5.597	934	809	765	687	573	622
5.601	896	862	743	687	542	602
5.605	918	843	780	666	579	597
5.609	873	815	786	678	548	553
5.613	937	826	793	652	612	603
5.617	941	836	801	598	548	567
5.621	955	849	770	650	625	623
5.625	858	788	759	630	588	598
5.629	957	816	727	655	574	571
5.633	903	795	748	637	558	588
5.637	945	821	753	667	611	633
5.641	948	836	809	690	571	581
5.645	882	860	776	631	583	621
5.649	929	792	790	678	576	600
5.653	918	845	773	725	624	579
5.657	892	819	764	635	582	579
5.661	971	828	751	617	640	606
5.665	970	770	795	633	581	561
5.669	1009	844	718	639	575	573
5.673	911	849	787	698	622	632
5.677	970	829	722	641	572	597
5.681	993	831	789	656	591	574
5.685	910	831	768	635	581	616
5.689	974	816	751	663	572	616
5.693	916	860	788	694	592	610
5.697	1005	834	774	674	600	621
5.701	924	823	700	642	616	561
5.705	980	834	784	651	612	568
5.709	944	881	743	658	597	604
5.713	1015	865	770	646	606	550
5.717	1034	945	823	638	570	552
5.721	1009	902	886	655	539	586
5.725	1020	897	959	612	552	602
5.729	954	1041	1284	583	610	613
5.733	1090	1000	1664	647	616	613
5.737	956	926	2268	641	594	583
5.741	987	869	3317	686	552	564
5.745	955	873	4923	638	558	628
5.749	962	896	6672	659	554	551
5.753	895	895	9034	648	546	640
5.757	952	897	11995	629	607	582
5.761	984	917	14751	651	593	603
5.765	969	959	17268	687	636	606
5.769	1119	970	19581	841	624	593
5.773	1248	1213	21406	865	702	620
5.777	1381	1410	21994	1056	791	607
5.781	1709	1938	20767	1447	924	598
5.785	2248	2720	18883	1866	1055	631
5.789	3008	3517	17014	2365	1478	637
5.793	3944	4926	14134	3079	1811	734
5.797	5198	6987	11472	4071	2372	804
5.801	7320	8969	9315	4712	2928	778
5.805	8930	10197	7119	5777	3513	958
5.809	10171	11683	5360	6521	4113	925
5.813	10875	13654	4134	6949	4401	1021
5.817	11635	14833	3357	6813	4573	1048
5.821	11609	14472	2758	6829	4710	1013
5.825	10750	13708	2263	6663	4356	1077
5.829	9665	12434	1997	6282	4132	1042
5.833	8088	10749	1883	5047	3530	985
5.837	5891	8790	1746	4329	3095	959
5.841	5051	6707	1613	3663	2604	865
5.845	3923	4665	1476	2947	2163	834
5.849	3048	3656	1399	2370	1720	738
5.853	2390	2730	1441	1980	1455	779
5.857	1949	2236	1296	1711	1192	738
5.861	1624	1813	1282	1495	1132	704
5.865	1403	1572	1230	1353	1009	711
5.869	1393	1368	1149	1255	887	689
5.873	1272	1251	1189	1171	829	675
5.877	1301	1241	1162	1064	822	722
5.881	1228	1105	1132	1016	844	675
5.885	1113	1119	1084	1036	758	638
5.889	1021	1036	1056	925	765	666
5.893	1100	1004	1046	899	759	646
5.897	1085	956	1058	911	774	691
5.901	1047	994	1119	899	681	607
5.905	1033	959	1065	868	721	637
5.909	1030	929	1143	841	733	622
5.913	1016	945	1052	832	739	644
5.917	1008	950	966	767	653	626
5.921	1018	930	925	735	689	625
5.925	1092	930	971	761	692	636
5.929	993	945	935	743	655	624
5.933	924	921	919	768	707	597
5.937	992	884	901	823	696	672
5.941	924	893	962	725	662	600
5.945	999	942	844	779	700	692
5.949	844	794	894	734	693	648
5.953	942	888	886	715	635	661
5.957	922	858	893	757	589	625
5.961	903	811	849	762	694	591
5.965	942	852	922	731	648	640
5.969	928	873	915	690	644	613
5.973	941	838	857	723	611	618
5.977	910	868	815	689	631	605
5.981	868	842	840	652	655	577
5.985	893	890	808	763	704	647
5.989	852	818	825	700	576	611
5.993	922	867	836	668	600	588
5.997	886	866	889	692	612	659
6.001	892	858	807	703	587	629
6.005	869	873	838	695	601	653
6.009	916	871	843	731	583	649
6.013	877	884	864	686	679	613
6.017	887	813	797	719	619	595
6.021	887	888	805	649	624	582
6.025	911	816	834	713	586	655
6.029	824	862	836	660	658	610
6.033	848	830	825	687	555	612
6.037	829	841	819	707	613	592
6.041	819	801	794	704	564	575
6.045	827	819	791	730	629	587
6.049	806	859	794	679	613	612
6.053	899	889	817	666	636	610
6.057	936	883	791	680	614	603
6.061	831	923	782	660	634	572
6.065	876	828	795	664	616	623
6.069	927	790	745	706	620	637
6.073	841	785	767	673	642	601
6.077	843	788	831	716	556	590
6.081	821	828	777	645	600	620
6.085	883	803	760	686	607	527
6.089	858	841	822	679	627	559
6.093	823	765	759	664	610	575
6.097	860	788	792	695	604	593
6.101	892	811	711	696	621	590
6.105	811	777	817	657	626	583
6.109	871	813	836	707	595	637
6.114	815	817	779	656	608	604
6.117	850	837	712	716	595	599
6.121	838	802	736	631	660	591
6.125	886	746	773	708	628	524
6.129	818	841	798	685	610	591
6.133	835	824	720	724	612	608
6.137	835	828	714	658	617	604
6.141	887	774	768	667	614	565
6.146	825	792	744	680	626	616
6.149	754	769	739	703	596	627
6.154	819	793	761	633	584	577
6.157	820	796	729	600	600	608
6.161	859	787	782	581	535	598
6.165	846	783	736	657	606	616
6.169	861	833	737	644	587	624
6.173	761	827	742	648	616	583
6.177	872	779	784	655	590	570
6.182	820	797	718	634	635	598
6.186	862	825	785	665	599	595
6.189	774	765	794	703	627	623
6.193	896	783	776	667	586	614
6.197	822	810	712	639	606	599
6.201	875	787	760	666	671	623
6.205	829	787	731	643	595	618
6.209	818	814	777	673	613	573
6.214	876	800	743	621	677	603
6.218	809	761	786	657	617	583
6.222	817	792	741	731	603	562
6.226	791	743	744	637	665	584
6.229	924	732	736	671	650	590
6.233	903	773	731	670	627	609
6.238	823	778	740	630	661	616
6.242	847	707	774	660	629	621
6.246	837	813	743	693	631	608
6.25	787	824	706	650	621	581
6.254	768	790	725	707	601	609
6.258	839	847	750	653	611	604
6.261	742	763	818	655	596	567
6.266	803	768	711	698	637	593
6.269	812	782	745	641	572	617
6.274	846	818	797	659	623	626
6.278	798	839	754	647	613	669
6.282	833	791	775	647	652	576
6.286	805	765	718	657	567	598
6.29	862	760	734	613	649	620
6.294	759	783	672	664	2607	619
6.298	801	747	681	646	11647	585
6.302	835	725	762	640	18322	632
6.305	839	744	726	607	23544	592
6.309	828	721	745	621	26759	573
6.314	817	755	752	695	29010	573
6.318	791	765	725	642	30220	587
6.322	856	789	707	665	29669	556
6.326	802	776	751	617	28517	612
6.33	805	780	736	652	26340	607
6.334	783	760	715	635	23933	595
6.338	813	756	765	640	21107	596
6.342	753	790	775	648	18453	604
6.346	840	777	807	671	16372	596
6.35	816	790	732	758	14605	616
6.354	833	815	737	672	13139	591
6.358	829	811	713	686	11561	614
6.362	851	726	733	646	10463	580
6.366	833	786	721	683	9321	542
6.37	849	786	747	582	8237	614
6.374	879	741	778	652	7582	591
6.378	766	755	773	642	7205	573
6.382	850	782	753	656	6860	612
6.386	810	808	769	663	6414	585
6.39	844	728	762	655	6049	597
6.394	775	736	732	667	5353	588
6.398	868	865	730	668	5115	547
6.402	788	752	729	658	4716	558
6.406	786	741	715	634	4573	613
6.41	816	733	740	683	4400	577
6.414	787	781	724	706	4069	625
6.418	794	790	704	679	3995	616
6.422	814	733	748	562	3753	571
6.426	760	742	780	665	3471	592
6.43	781	779	696	652	3478	566
6.434	784	781	740	646	3293	653
6.438	815	747	732	674	3193	656
6.442	823	761	756	655	3006	610
6.446	823	771	716	626	2948	566
6.45	796	800	735	624	2785	614
6.454	768	786	699	660	2678	618
6.458	777	759	703	671	2687	599
6.462	808	786	699	687	2526	588
6.466	798	828	705	652	2414	587
6.47	853	765	712	715	2513	606
6.474	826	749	734	677	2352	611
6.478	761	757	697	607	2287	606
6.482	810	759	687	694	2203	676
6.486	808	792	695	661	2069	636
6.49	726	763	740	603	2123	573
6.494	768	732	763	644	2025	569
6.498	803	780	761	623	2047	597
6.502	788	754	680	682	1840	599
6.506	821	740	755	653	1901	605
6.51	859	821	771	698	1775	605
6.514	798	747	727	668	1794	604
6.518	850	771	733	672	1765	645
6.522	748	762	701	658	1688	606
6.526	819	744	720	635	1658	587
6.53	855	754	776	648	1645	604
6.534	790	743	768	681	1551	616
6.538	832	801	683	631	1628	593
6.542	775	766	717	689	1487	617
6.546	786	772	729	654	1483	573
6.55	792	786	765	689	1422	554
6.554	814	835	823	700	1445	659
6.558	837	830	770	605	1387	612
6.562	849	767	736	674	1393	561
6.566	821	785	685	617	1434	591
6.57	793	789	739	626	1379	607
6.574	835	732	779	676	1283	573
6.578	823	779	740	640	1366	571
6.582	796	785	740	631	1273	587
6.586	829	760	752	651	1245	604
6.59	838	735	721	708	1254	624
6.594	840	707	723	662	1199	648
6.598	790	716	737	633	1225	578
6.602	804	865	713	605	1218	559
6.606	727	839	659	601	1226	569
6.61	818	774	703	658	1175	599
6.614	762	737	751	676	1169	614
6.618	797	747	754	628	1153	612
6.622	731	743	744	641	1105	583
6.626	751	744	722	655	1164	615
6.63	838	785	686	636	1105	594
6.634	795	776	747	618	1179	569
6.638	786	772	676	687	1125	613
6.642	836	785	721	624	1076	600
6.646	814	772	734	636	1133	609
6.65	869	727	733	638	1040	585
6.654	858	739	724	650	1122	591
6.658	809	764	711	659	1094	588
6.662	841	794	669	646	1063	554
6.666	781	759	717	678	1095	640
6.67	768	742	693	660	1006	609
6.674	794	777	691	644	1082	620
6.678	845	765	713	627	1110	601
6.682	755	717	761	667	1051	579
6.686	767	747	798	616	998	621
6.69	791	716	810	644	1014	617
6.694	792	752	849	631	984	637
6.698	764	773	853	607	987	599
6.702	858	756	789	629	1011	601
6.706	769	748	853	632	1047	590
6.71	798	741	860	654	991	631
6.714	788	729	848	638	966	591
6.718	842	715	796	719	937	614
6.722	851	781	851	664	935	618
6.726	816	821	812	699	979	607
6.73	801	834	810	670	1013	636
6.734	813	800	754	634	987	589
6.738	802	761	755	756	956	616
6.742	856	813	775	716	944	584
6.746	881	853	748	758	928	551
6.75	879	811	737	736	939	611
6.754	831	913	770	765	886	587
6.758	846	812	763	781	943	631
6.762	854	840	721	745	935	593
6.766	768	868	762	808	983	590
6.77	769	817	705	733	829	632
6.774	797	797	735	702	981	583
6.778	817	863	693	696	935	587
6.782	768	847	769	703	879	593
6.786	801	866	770	741	910	634
6.79	779	899	741	710	836	550
6.794	782	904	708	650	811	598
6.798	832	899	758	700	902	649
6.802	889	910	779	689	846	561
6.806	842	925	737	648	807	591
6.81	884	928	725	652	874	612
6.814	872	983	769	657	869	591
6.818	897	955	697	693	865	564
6.822	920	1005	725	723	833	590
6.826	955	1012	741	670	825	641
6.83	979	968	666	684	827	586
6.834	996	959	763	628	873	639
6.838	1017	946	751	667	818	645
6.842	987	991	699	667	850	595
6.846	957	953	756	640	842	567
6.85	1015	896	765	658	766	568
6.854	1041	916	704	709	744	621
6.858	1050	893	752	664	796	601
6.862	1014	879	696	682	787	588
6.866	996	891	724	680	801	587
6.87	1022	874	768	659	808	589
6.874	1036	863	719	684	839	568
6.878	987	875	758	694	811	581
6.882	936	934	733	768	812	612
6.886	988	907	713	712	760	623
6.89	976	897	773	713	793	637
6.894	856	833	721	676	773	666
6.898	963	882	729	780	761	564
6.902	852	817	734	763	805	599
6.906	870	946	713	802	788	601
6.91	891	857	740	800	749	630
6.914	926	928	710	719	754	612
6.918	869	945	745	816	787	589
6.922	904	947	703	793	744	599
6.926	898	892	728	771	759	598
6.93	862	820	708	722	775	585
6.934	912	898	710	815	806	596
6.938	936	847	736	769	711	600
6.942	935	895	691	803	765	569
6.946	888	922	764	762	728	620
6.95	881	982	738	744	807	586
6.954	912	913	685	766	742	579
6.958	874	909	685	763	767	633
6.962	910	893	695	758	749	638
6.966	871	846	705	767	809	597
6.97	959	930	734	773	686	571
6.974	960	897	715	733	742	588
6.978	950	890	678	718	775	570
6.982	961	878	730	732	747	580
6.986	964	870	697	742	754	622
6.99	909	840	731	703	744	620
6.994	938	913	711	772	736	549
6.998	855	889	725	780	714	581
7.002	939	790	725	795	785	592
7.006	909	859	731	868	702	583
7.01	834	862	735	867	708	594
7.014	889	850	730	911	736	630
7.018	848	812	712	995	721	569
7.022	919	868	719	1008	717	537
7.026	920	931	689	1033	746	652
7.03	893	956	692	1072	682	621
7.034	869	981	715	1147	658	616
7.038	917	918	699	1103	732	642
7.042	831	995	667	1186	654	627
7.046	891	1101	741	1220	718	626
7.05	854	1058	733	1223	739	625
7.054	898	1060	718	1220	699	565
7.058	958	1141	765	1218	711	583
7.062	980	1102	724	1221	736	597
7.066	1061	1155	708	1241	732	626
7.07	1086	1173	747	1223	670	617
7.074	1108	1147	691	1152	735	632
7.078	1075	1254	713	1152	720	635
7.082	1097	1250	684	1085	722	623
7.086	1222	1269	784	1064	759	579
7.09	1289	1354	748	1111	722	604
7.094	1214	1493	746	1095	670	562
7.098	1237	1596	721	1067	710	602
7.102	1334	1715	765	1112	703	590
7.106	1363	1817	747	1021	721	606
7.11	1399	1846	759	1041	725	620
7.114	1390	1896	748	941	674	623
7.118	1555	1901	718	936	755	618
7.122	1590	1942	727	1041	692	622
7.126	1656	2035	701	916	691	640
7.13	1797	2126	730	982	742	618
7.134	1895	2108	705	981	680	541
7.138	1921	2215	759	956	696	573
7.142	1992	2152	721	945	699	563
7.146	2054	2308	745	974	718	600
7.15	2159	2196	824	929	644	613
7.154	2233	2361	743	972	668	547
7.158	2170	2444	730	913	676	634
7.162	2247	2465	727	900	686	628
7.166	2427	2619	718	913	692	614
7.17	2397	2535	712	886	637	645
7.174	2410	2576	728	868	692	584
7.178	2440	2651	683	924	696	607
7.182	2564	2654	697	904	760	583
7.186	2734	2675	709	881	735	627
7.19	2612	2814	729	932	671	625
7.194	2760	2817	725	886	725	543
7.198	2615	2820	672	871	640	561
7.202	2775	2895	690	939	707	604
7.206	2730	2826	770	909	692	610
7.21	2972	2970	725	888	652	624
7.214	2895	2944	731	849	623	622
7.218	2830	3035	731	842	734	658
7.222	2934	3143	784	873	712	597
7.226	3093	3212	748	898	726	597
7.23	3034	3292	747	852	685	598
7.234	3103	3311	680	855	694	579
7.238	3222	3369	704	846	693	611
7.242	3268	3298	666	877	721	577
7.246	3192	3324	758	899	647	571
7.25	3447	3291	735	846	732	626
7.254	3254	3347	743	835	669	577
7.258	3378	3533	766	885	732	593
7.262	3413	3394	651	883	663	613
7.266	3511	3356	721	833	685	567
7.27	3446	3537	685	869	642	631
7.274	3686	3584	687	862	702	574
7.278	3674	3715	716	853	674	570
7.282	3725	3609	741	849	659	602
7.286	3580	3714	680	861	707	625
7.29	3732	3653	713	799	688	595
7.294	3795	3808	711	840	734	597
7.298	3800	3836	700	854	647	595
7.302	3910	4010	729	829	689	629
7.306	3934	3813	655	826	645	605
7.31	3943	3979	660	801	636	583
7.314	4076	3937	743	882	648	592
7.318	4131	4029	708	851	599	590
7.322	4002	4220	731	825	680	585
7.326	4084	4191	818	783	649	591
7.33	4248	4243	676	855	650	598
7.334	4157	4327	753	882	694	631
7.338	4226	4340	692	853	616	597
7.342	4410	4335	735	856	680	559
7.346	4474	4382	709	836	605	573
7.35	4283	4383	734	939	692	654
7.354	4532	4424	710	885	682	602
7.358	4449	4591	668	854	678	611
7.362	4576	4410	746	923	712	619
7.366	4601	4705	695	1002	607	520
7.37	4658	4719	736	1004	696	605
7.374	4631	4827	715	1053	691	584
7.378	4863	4860	714	1005	672	606
7.382	4937	4990	707	992	674	629
7.386	4837	4762	741	1037	691	596
7.39	4977	4965	747	1086	639	593
7.394	5090	4862	729	997	689	594
7.398	4915	4375	707	1048	644	555
7.402	5061	3637	829	1037	619	601
7.406	5243	3223	801	1059	672	611
7.41	5518	2925	861	1157	662	554
7.414	5315	2617	862	1109	619	575
7.418	5395	2455	899	1188	715	610
7.422	5385	2361	908	1207	657	598
7.426	5400	2312	909	1249	686	626
7.43	5530	2292	924	1217	681	598
7.434	5422	2337	922	1287	633	585
7.438	5479	2136	905	1366	588	602
7.442	5452	1976	875	1335	631	601
7.446	5781	2007	901	1301	696	646
7.45	6071	2106	859	1387	629	616
7.454	5994	1969	869	1315	686	599
7.458	5715	1819	864	1382	707	539
7.462	5890	1863	833	1419	647	683
7.466	6091	1877	914	1463	698	614
7.47	5963	1833	851	1529	692	584
7.474	6316	1885	837	1524	694	597
7.478	5984	1865	845	1654	659	596
7.482	6621	1827	840	1622	726	628
7.486	6474	1838	789	1623	678	585
7.49	5981	1823	865	1596	684	570
7.494	6787	1668	818	1626	704	625
7.498	6729	1734	738	1634	657	547
7.502	6393	1682	798	1718	691	639
7.506	6910	1698	809	1680	711	620
7.51	7058	1681	798	1746	690	595
7.514	7266	1608	832	1752	688	631
7.518	7051	1637	837	1773	708	655
7.522	7489	1477	758	1793	660	670
7.526	7589	1665	833	1866	675	582
7.53	7417	1630	802	1853	669	622
7.534	7179	1639	846	1844	649	565
7.538	7285	1695	797	1940	656	571
7.542	7159	1718	773	1917	688	552
7.546	7708	1623	781	1973	710	560
7.55	8003	1740	788	2004	693	569
7.554	7752	1732	806	2065	722	602
7.558	7021	1823	793	2047	706	565
7.562	7024	1691	811	2046	670	606
7.566	7213	1831	753	2015	729	570
7.57	7257	1863	792	2187	661	615
7.574	7617	1924	765	2095	671	592
7.578	7583	1943	718	2161	722	621
7.582	8052	1999	795	2276	727	595
7.586	7949	1998	779	2310	742	551
7.59	7926	1989	754	2283	750	632
7.594	8090	2028	831	2315	713	580
7.598	7941	1980	769	2381	703	644
7.602	7652	1895	760	2411	675	598
7.606	8114	1763	748	2340	681	590
7.61	8297	1821	736	2423	724	591
7.614	8218	1819	781	2557	663	583
7.618	8159	1732	815	2407	691	628
7.622	8457	1671	742	2486	696	574
7.626	8238	1751	799	2530	649	611
7.63	8467	1602	761	2482	668	610
7.634	7917	1527	776	2508	699	596
7.638	8086	1563	740	2725	674	589
7.642	8986	1545	734	2569	675	552
7.646	8904	1470	825	2539	636	588
7.65	8759	1469	773	2669	652	588
7.654	8864	1371	731	2718	697	588
7.658	8704	1541	736	2749	645	578
7.662	8769	1499	716	2787	657	598
7.666	8798	1363	670	2739	645	595
7.67	9099	1373	747	2770	585	586
7.674	9444	1399	730	2904	696	575
7.678	8896	1428	756	2825	613	582
7.682	8606	1440	718	2919	623	535
7.686	8608	1424	702	2899	641	589
7.69	8755	1438	791	3018	680	609
7.694	8865	1346	689	3013	645	595
7.698	9033	1376	732	3119	697	599
7.702	8858	1336	709	2999	663	618
7.706	9098	1290	768	3090	695	575
7.71	7294	1336	728	3208	674	587
7.714	5189	1270	714	3132	685	624
7.718	4419	1334	695	3099	641	586
7.722	4101	1280	724	3200	649	558
7.726	3666	1368	708	3230	643	552
7.73	3466	1334	763	3225	645	591
7.734	3293	1296	773	3267	674	571
7.738	3217	1329	726	3246	628	602
7.742	2909	1281	742	2833	649	560
7.746	2897	1346	716	2386	631	655
7.75	2911	1244	684	2012	657	606
7.754	2657	1282	757	1886	646	613
7.758	2652	1311	674	1736	636	562
7.762	2616	1200	665	1563	664	587
7.766	2647	1223	704	1530	677	589
7.77	2539	1186	750	1501	692	585
7.774	2524	1255	756	1453	651	670
7.778	2590	1198	736	1466	659	592
7.782	2733	1162	716	1395	656	579
7.786	2814	1262	691	1368	614	610
7.79	2778	1152	704	1379	640	630
7.794	2795	1231	746	1309	623	599
7.798	2872	1245	715	1284	666	601
7.802	2861	1226	704	1208	646	606
7.806	2936	1232	715	1203	684	609
7.81	2842	1210	757	1137	652	637
7.814	3046	1198	764	1186	629	585
7.818	2961	1244	740	1242	601	567
7.822	2914	1239	724	1211	677	605
7.826	3008	1167	755	1175	665	600
7.83	3126	1188	672	1173	649	582
7.834	2928	1155	705	1110	646	574
7.838	2966	1181	694	1105	623	584
7.842	2916	1175	773	1067	670	569
7.846	2887	1145	688	1122	657	597
7.85	2984	1180	747	1099	629	562
7.854	3050	1127	781	1133	602	588
7.858	2916	1158	726	1067	622	591
7.862	3042	1144	750	1050	641	605
7.866	3008	1141	687	1045	674	609
7.87	2958	1192	686	1028	626	601
7.874	2878	1140	687	1022	676	616
7.878	2821	1204	731	1073	632	591
7.882	2460	1070	712	1081	669	538
7.886	2398	1116	724	1082	647	598
7.89	2249	1130	782	966	694	597
7.894	2249	1133	744	1025	657	635
7.898	2220	1088	732	960	631	596
7.902	2215	1121	748	1006	640	610
7.906	2065	1186	691	1045	653	569
7.91	2062	1102	673	989	688	592
7.914	1984	1102	712	923	643	569
7.918	2030	1062	740	930	596	600
7.922	1973	1084	722	965	642	602
7.926	1925	1103	704	925	628	586
7.93	1878	1098	696	903	658	622
7.934	1955	1087	699	930	627	645
7.938	1872	1135	753	989	609	600
7.942	1810	1021	719	938	643	586
7.946	1771	1065	720	958	683	601
7.95	1896	1078	706	981	631	588
7.954	1816	1062	706	951	623	592
7.958	1777	1057	682	1021	668	621
7.962	1791	1026	703	971	585	638
7.966	1775	1012	761	955	703	576
7.97	1773	1025	669	964	614	588
7.974	1695	1121	788	990	625	593
7.978	1716	1010	795	890	676	592
7.982	1738	1095	741	957	638	597
7.986	1652	1062	752	945	643	590
7.99	1671	1014	791	916	641	540
7.995	1686	1009	791	848	655	568
7.998	1643	1106	774	911	681	576
[truncated: 7,371 more rows]
