# Supplementary material for: Metabolite exchange between microbiome members produces compounds that influence Drosophila behavior
Source: eLife. 2017 Jan 9;6:e18855. doi: 10.7554/eLife.18855 (PMC5222558; doi:10.7554/eLife.18855)
Supplement: Figure 5—source data 2. — DOI: http://dx.doi.org/10.7554/eLife.18855.038 [file elife-18855-fig5-data2.xlsx]

## Sheet: Peaks_2_16
scamlp	RT	area	scam			sc			am			ajm			blank6
Relative_area	1.287	186.789	Relative_area	1.287	196.371	Relative_area	1.279	191.842		1.283	538.904		1.287	232.631		1.287	150.719
	1.351	107.192		1.347	120.423		1.343	203.531		1.347	47.565		1.419	60.635		1.599	17.669
	1.403	1602.57		1.415	11045		1.383	2453.99		1.371	41.906		2.384	36.456		5.826	24.052
	1.423	2657.53		1.575	100.282		1.407	10024.5		1.423	15.13		3.492	105.1		18.108	7859.48
	1.575	147.881		1.947	26337.4		1.419	4995.88		1.495	11.481		5.821	186.323		24.324	72.693
	1.927	9061.55		2.023	10761.6		1.667	36.253		1.571	11.568		6.318	1908.69		26.257	199.552
	1.943	10245		2.031	7043.04		1.807	36.715		2.167	10.708		8.067	44.332		27.353	35.341
	2.047	15723.2		2.099	13339.9		1.935	16.673		2.668	64.585		8.247	157.127		32.476	24.176
	2.147	23994.5		2.151	17494		2.027	2350.72		3.504	15.898		15.683	107.935		32.512	10.118
	2.203	18621.8		2.295	72.291		2.275	39.795		3.924	110.198		18.108	5897.49		32.916	17.651
	2.223	7194.11		2.375	26.47		2.363	35.795		3.94	55.769		23.499	11.224		32.964	16.35
	2.243	9535.33		2.679	34.857		2.628	68.935		5.813	310.387		24.32	189.144		33.032	13.753
	2.736	39.936	0.0266139	2.996	116.088	0.0127715	2.972	43.815		7.734	277.11		24.876	12.664		33.117	20.125
0.549443	3.016	2290.6		3.24	29.098		3.236	35.523		10.1	15.645		26.253	673.196		33.217	12.934
	3.24	88.805		3.404	7078.26		3.268	40.51		14.118	58.751		26.849	21.425		33.261	14.097
	3.408	2842.98		3.48	3439.96		3.364	5817.29		15.69	203.965		27.349	481.393		33.325	38.008
	3.484	2937.32		3.752	18.978		3.38	15916.7		18.104	6211.67		27.417	60.556		33.469	23.515
	3.988	150.627		3.884	34.477		3.452	8390.6		23.495	20.553		27.621	72.424		33.629	20.157
	4.008	95.038		4.316	1563.44		3.948	58.612		24.323	164.141		28.202	18.217		33.693	17.757
	4.32	1882.78		4.705	29.923		5.777	953.176		24.883	15.508		32.304	11.285		33.749	15.294
	4.697	158.34		5.817	599.274		10.064	42.674		25.632	15.338		32.732	10.914		33.817	14.867
	5.817	443.618		7.238	255.414		15.627	218.766		26.256	655.754		32.752	17.141		33.897	21.546
	7.21	107.178		7.382	559.687		15.643	428.111		26.849	24.511		32.776	12.683		33.937	25.803
	7.282	135.141		7.594	45.044		18.064	3430.7		27.349	466.292		32.8	16.33		34.041	11.492
	7.346	170.795		8.618	6850.18		18.953	155.6		27.425	37.157		32.828	22.424		34.105	36.963
	7.41	234.906		8.714	2269.29		23.399	34876.7		27.625	32.491		32.845	17.214		34.145	15.835
	7.45	165.924		10.127	23.399		23.804	49.299		28.201	15.716		32.868	12.396		34.177	16.396
	7.482	149.078		13.365	32.013		24.212	18.056		32.591	10.982		32.888	16.743		34.221	14.307
	7.526	264.914		15.69	515.399		24.312	3169.26		32.615	11.772		32.904	36.99		34.265	14.853
	7.55	142.381		18.111	4361.94		24.744	26.605		32.655	10.172		32.953	34.416		34.317	13.335
	7.594	245.252		23.382	13813.1		24.864	28.515		32.671	12.709		32.985	37.935		34.393	30.763
	7.61	78.171		23.814	90.105		25.116	10.461		32.939	23.993		33.021	33.557		34.525	14.193
	7.63	134.002		23.894	14.81		25.172	953.947		32.991	16.157		33.041	22.739		34.569	14.123
	7.642	197.557		24.222	23.252		25.433	67.108		33.027	24.317		33.057	17.377		34.653	28.757
	7.674	175.567		24.323	551.359		25.557	199.264		33.067	12.179		33.081	26.412		34.761	32.796
	7.706	279.983		24.755	74.878		25.625	62.281		33.108	15.242		33.097	26.025		34.797	19.045
	7.83	83.313		24.859	17.769		25.713	15.304		33.128	10.662		33.121	27.49		34.833	16.271
	7.854	59.64		24.867	18.923		25.749	66.46		33.16	61.374		33.149	18.836		34.921	17.903
	8.619	5281.14		25.183	261.298		25.817	170.314		33.192	30.146		33.165	22.132		34.993	10.162
	8.719	3448.12		25.555	17.574		25.861	58.95		33.22	23.228		33.177	47.796		35.057	14.114
	15.687	412.592		25.631	35.132		25.905	27.718		33.24	18.077		33.205	18.777		35.181	21.123
	18.112	4168.94		25.755	48.145		26.025	16.115		33.252	18.047		33.233	30.382		35.217	17.747
	23.387	13162.9		25.815	5728.95		26.245	11811.2		33.272	39.44		33.277	67.688		35.285	16.85
	23.732	19.508		25.935	175.741		26.413	24.186		33.312	41.802		33.305	40.575		35.338	18.477
	23.744	40.848		26.256	889.217		26.613	89.547		33.352	59.55		33.333	44.916		35.438	26.972
	23.82	58.803		26.796	17.106		26.661	18.159		33.372	34.476		33.377	57.372		35.522	19.975
	24.224	15.8		26.848	31.25		26.793	20.865		33.4	22.988		33.405	79.412		35.586	24.715
	24.32	638.222		26.884	44.466		26.845	555.148		33.412	24.337		33.453	42.689		35.63	17.279
	24.696	82.048		26.936	361.283		26.877	215.477		33.44	79.15		33.465	23.552		35.714	11.477
	24.752	134.214		27.024	90.358		26.933	622.463		33.492	63.914		33.489	29.434		35.786	20.465
	24.848	22.906		27.348	553.985		27.037	22.574		33.532	49.543		33.513	73.987		35.83	14.835
	24.868	37.164		27.624	42.392		27.065	23.071		33.54	35.371		33.549	53.471		35.886	16.587
	25.185	167.73		27.688	18.899		27.346	8695.12		33.572	34.041		33.577	26.112		35.982	10.773
	25.557	11.934		27.74	17.885		27.63	91.849		33.584	30.084		33.593	41.305		36.078	13.843
	25.633	25.839		28.081	18.808		27.738	214.317		33.612	83.337		33.617	26.572		36.118	27.848
	25.753	49.566		28.113	12.084		28.074	12.053		33.644	24.153		33.629	18.45		36.15	11.343
	25.813	6552.27		28.201	84.165		28.198	1344.27		33.664	43.908		33.653	62.519		36.302	16.897
	26.253	1191.99		29.777	12.421		28.898	53.975		33.688	19.569		33.685	46.192		36.362	26.636
	26.85	36.689		32.651	12.396		32.764	16.212		33.716	31.228		33.717	43.527		36.474	22.504
	26.942	84.108		32.819	10.378		33.092	16.517		33.732	31.094		33.769	44.941		36.518	13.667
	27.022	12.513		33.007	14.364		33.193	10.692		33.748	20.314		33.797	41.231		36.574	21.676
	27.35	758.259		33.035	19.587		33.345	17.85		33.768	16.559		33.817	27.344		36.626	21.404
	27.622	20.143		33.091	12.566		33.389	14.964		33.784	20.066		33.837	18.598		36.686	25.073
	28.199	42.532		33.119	10.96		33.601	10.039		33.804	20.734		33.849	41.331		36.722	21.197
	32.533	11.438		33.336	10.551		33.917	12.22		33.848	26.065		33.893	19.017		36.77	16.543
	32.553	13.756		33.376	10.238		33.949	10.043		33.868	12.022		33.913	27.847		36.842	11.421
	32.601	20.317		33.672	21.815		34.129	19.576		33.88	13.206		33.941	11.859		36.966	42.079
	32.621	12.318		33.78	14.816		34.249	11.487		34.1	12.242		33.961	13.014		36.994	13.064
	32.885	11.445		33.856	10.488		34.409	12.77		34.164	10.873		33.985	23.911		37.059	10.392
	33.25	15.253		34.012	13.792		34.429	11.853		34.324	10.212		34.117	11.11		37.099	11.561
	33.278	15.412		34.06	17.645		34.485	11.48		34.384	26.549		34.145	14.122		37.131	22.696
	33.302	20.641		34.084	27.383		34.677	10.991		34.416	11.386		34.361	11.356		37.199	11.192
	33.318	23.83		34.176	27.572		34.997	11.297		34.436	30.166		34.525	21.486		37.231	17.085
	33.414	10.046		34.288	12.668		35.029	19.923		34.472	27.17		34.754	15.716		37.255	24.122
	33.458	33.819		34.404	17.507		35.058	16.611		34.512	10.008		34.822	19.916		37.327	20.452
	33.49	14.506		34.452	16.247		35.081	19.49		34.536	18.17		34.982	13.23		37.379	13.481
	33.506	16.28		34.464	15.169		35.102	15.028		34.56	21.248		35.062	19.993		37.419	19.134
	33.53	24.64		34.496	29.27		35.13	17.475		34.588	15.486		35.126	15.476		37.479	11.44
	33.546	27.752		34.568	17.374		35.17	16.636		34.612	26.963		35.182	23.696
	33.566	30.35		34.616	13.138		35.33	16.202		34.648	24.367		35.206	25.555
	33.582	27.402		34.752	11.601		35.386	12.244		34.672	20.09		35.23	10.611
	33.606	41.217		34.78	16.449		35.474	12.07		34.692	16.526		35.242	12.616
	33.634	38.294		34.848	15.669		35.534	18.683		34.72	19.742		35.458	15.351
	33.674	41.851		34.88	14.495		35.622	21.974		34.744	34.662		35.546	11.269
	33.698	39.125		34.916	16.58		35.654	15.358		34.78	37.139		35.586	10.341
	33.738	21.193		34.956	19.119		35.918	19.098		34.796	26.732		35.618	11.509
	33.75	22.199		35.013	31.051		35.958	17.824		34.817	18.906		35.69	15.388
	33.778	17.284		35.045	31.799		35.974	12.825		34.844	38.342		35.886	18.45
	33.798	45.312		35.101	32.412		35.998	15.459		34.884	33.477		35.95	10.19
	33.834	22.891		35.141	22.232		36.014	21.727		34.917	16.05		35.962	10.126
	33.85	13.925		35.161	15.654		36.042	14.158		34.937	21.777		35.994	23.193
	33.866	13.255		35.301	11.635		36.07	38.979		34.957	17.523		36.034	19.097
	33.89	25.273		35.341	10.995		36.106	22.737		34.997	21.765		36.503	18.951
	33.922	14.184		35.373	29.873		36.126	20.426		35.017	10.067		36.659	10.577
	33.962	10.308		35.517	18.354		36.146	27.096		35.033	15.133		36.791	16.388
	33.978	10.287		35.585	11.044		36.166	20.685		35.069	27.57		36.955	16.751
	34.05	13.962		35.613	12.626		36.178	16.427		35.221	11.134		36.995	10.543
	34.206	21.282		35.653	12.402		36.194	26.888		35.245	15.87		37.211	13.97
	34.238	11.771		35.685	14.102		36.214	31.895		35.325	16.432		37.259	19.557
	34.254	23.041		35.745	19.455		36.238	49.715		35.805	13.368		37.391	23.464
	34.566	10.411		35.821	11.996		36.286	44.406		35.905	14.588
	34.598	11.671		35.921	21.396		36.306	16.325		35.925	13.363
	34.634	11.226		35.941	13.52		36.338	23.887		35.953	18.116
	34.774	10.462		36.165	13.063		36.35	28.623		35.981	14.93
	34.794	13.628		36.249	40.365		36.382	41.042		36.017	20.426
	34.974	15.127		36.313	16.806		36.458	22.62		36.505	18.729
	35.015	21.228		36.577	17.942		36.578	10.919		36.537	10.254
	35.055	13.621		36.797	13.174		36.634	19.967		36.593	20.468
	35.267	14.011		37.065	12.697		36.666	10.795		36.934	13.943
	35.299	11.449		37.125	11.01		36.702	12.601		36.95	14.01
	35.387	15.881		37.153	10.382		36.714	15.066		37.01	34.154
	35.507	12.925		37.173	10.819		36.738	15.754		37.05	25.798
	35.535	19.192		37.261	13.488		36.778	19.445		37.07	11.766
	35.751	14.452		37.309	15.198		36.814	11.031		37.09	10.619
	35.903	12.447		37.357	32.946		36.907	18.638		37.13	26.687
	35.955	12.066		37.41	20.195		37.027	12.028		37.154	15.12
	36.047	10.213					37.059	14.801		37.174	16.028
	36.087	13.323					37.111	10.297		37.206	25.986
	36.175	29.847					37.167	22.313		37.23	27.082
	36.227	14.439								37.41	11.515
	36.636	11.261								37.442	10.771
	36.664	11.866
	36.688	16.761
	36.74	20.134
	36.792	29.745
	36.808	18.725
	36.836	22.711
	36.852	15.811
	36.876	26.974
	36.908	39.127
	36.956	27.342
	36.976	14.6
	36.996	16.915
	37.02	27.968
	37.16	11.86
	37.28	15.925
	37.388	17.459
	37.428	12.362

## Sheet: Peaks_2_17
co_wt1			co_wt2			co_adh1			co_adh2			co_adh_aa			co_adh_acet			co_adh_aa_acet			mm1			mm2			mm3			ajm50p			blank13			scaplp_WT			scaplp_adh
Relative_area	1.287	115.601	Relative_area	1.283	129.766	Relative_area	1.283	275.766	Relative_area	1.287	275.731		1.283	172.038		1.283	138.826		1.283	135.486		1.287	172.057		1.287	146.628		1.283	125.643		1.287	145.83		1.287	156.39		1.287	141.922		1.283	601.893
	1.351	79.015		1.347	101.393		1.347	28.789		1.351	30.903		1.351	44.113		1.347	12794		1.331	1161.08		1.347	803.748		1.343	414.141		1.347	111.179		1.351	16.306		1.355	18.595		1.347	46.721		1.347	64.621
	1.399	5190.05		1.399	4200.68		1.399	7761.6		1.399	3115.39		1.403	17248.1		1.399	5203.21		1.351	1508		1.415	3416		1.355	242.763		1.415	13439.6		1.419	105.649		1.423	201.004		1.415	9192.55		1.407	8688.67
	1.423	9270.02		1.415	7919.32		1.415	13192.8		1.415	12085.5		1.679	16.217		1.411	7931.35		1.399	3963.61		1.487	250.269		1.419	9155.24		1.487	105.958		1.495	11.821		1.599	12.913		1.571	29.178		1.427	3281.49
	1.679	12.956		1.575	12.832		1.675	16.641		1.675	23.593		1.827	421.469		1.511	237.899		1.415	9438.19		1.575	45.761		1.487	289.277		1.571	85.828		1.683	25.514		5.821	31.993		1.927	15539.8		1.567	14.328
	1.939	17063.6		1.679	18.992		1.943	51.401		1.807	33.925		1.939	8245		1.679	18.406		1.507	221.55		1.679	15.413		1.547	11.448		1.811	570.401		2.288	442.376		18.099	8563.57		1.943	12447.3		1.675	21.6
	2.051	17268.9		1.931	16997.4		2.035	1072.62		1.943	118.9		2.043	26179.5		1.779	172.778		1.675	23.12		1.939	15772.5		1.575	38.367		1.935	27302.5		2.375	241.834		24.323	114.068		2.055	19925.3		1.851	22.942
	2.115	14561.5		1.943	8344.67		2.376	15.303		2.039	1108.09		2.323	38.513		1.939	138.185		1.939	6302.31		1.967	2122.76		1.595	22.735		2.011	9678.63		2.808	16.227		26.256	381.841		2.087	10929.9		1.939	197.056
	2.695	24.514		2.043	16017.6		2.64	51.868		2.372	19.158		2.371	17.105		2.039	318.029		2.099	29188.7		2.043	21552.6		1.807	1841.7		2.288	102.719		3.476	435.006		27.352	61.076		2.655	54.532		2.039	793.716
0.0420915	2.968	129.447		2.091	12786.2	0.00616543	2.944	19.013		2.62	65.069		2.668	27.257		2.288	59.682		2.247	32.937		2.287	133.732		1.919	10165.4		2.319	29.678		5.177	57.627		27.42	43.101	0.38435	2.924	1453.02		2.367	37.501
	3.236	76.824		2.671	25.408		3.28	57.58	0.0111684	2.924	36.744		2.736	41.789		2.375	43.162		2.295	12.431		2.323	60.002		1.931	5253.25		2.375	54.317		5.817	243.342		31.05	16.874		2.987	105.973		2.655	84.341
	3.412	14820.8	0.0333536	2.952	111.474		3.392	7884.24		3.276	135.502		2.956	33.101		2.644	32.76		2.327	19.015		2.375	75.75		1.955	9809.42		2.668	21.606		6.314	1413.57		31.491	11.015		3.232	190.086	0.456706	2.936	1582.05
	3.48	4034.03		2.992	47.311		3.408	10961.4		3.408	17901.4		2.992	967.598		2.912	87.153		2.736	40.172		2.664	22.632		2.119	35722.8		2.716	61.4		7.37	73.53		31.907	15.951		3.4	8188.85		3.28	63.091
	3.88	15.608		3.232	93.418		3.472	5896.04		3.472	5659.99		3.408	16717.4		3.248	4426.63		2.992	654.712		2.732	43.394		2.223	65.074		2.94	125.709		8.047	57.15		31.967	11.681		3.412	3012.16		3.404	14548.9
	4.324	101.533		3.4	9547.15		3.972	32.864		3.628	14.193		3.476	4447.7		3.396	9876.2		3.248	7587.16		2.948	30.917		2.291	105.024		2.988	1018.29		8.207	1074.28		32.099	14.351		3.476	3617.51		3.472	5504.33
	5.813	383.954		3.476	3254.9		5.814	414.561		3.916	32.466		3.792	122.359		3.472	2595.81		3.396	4884.95		2.988	1695.86		2.327	136.558		3.396	9163.08		15.687	149.277		32.131	13.544		3.752	13.94		3.912	533.954
	8.619	1109.05		4.316	175.782		8.255	57.932		3.98	39.577		3.876	10.595		3.92	22.023		3.408	7566.58		3.396	1843.27		2.379	49.238		3.472	7744.83		18.1	5770.86		32.175	29.685		3.86	10.176		3.976	51.402
	8.719	147.064		5.813	445.047		8.623	55.226		4.625	21.295		3.976	28.157		4.041	21.408		3.48	3232.2		3.472	688.341		2.603	14.266		3.788	128.675		23.503	15.424		32.303	18.158		4.308	1068.24		4.649	19.474
	15.678	161.624		8.615	2137.3		15.675	376.755		5.817	370.181		4.325	18.747		4.621	29153.7		3.792	119.591		3.788	244.48		2.715	316.445		4.316	186.373		24.323	133.313		32.339	13.016		4.644	90.449		5.809	381.873
	15.694	211.454		8.715	359.398		18.096	3083.81		8.631	74.987		5.041	113.356		4.641	17391.9		3.989	10.696		4.309	2677.7		2.992	1856.66		4.593	2136.83		26.072	29.489		32.379	12.371		5.813	411.727		7.582	56.018
	18.104	3075.37		15.687	447.173		23.383	18108.3		15.686	354.857		5.201	44.4		4.657	8835.78		4.032	40.796		4.597	7503.43		3.08	12.453		4.849	72.415		26.253	525.551		32.423	10.762		8.606	10720.1		8.23	151.663
	23.387	16853.6		18.104	3342.19		24.219	10.317		16.335	22.211		5.513	585.974		4.681	10039.2		4.629	31996.7		4.845	40.194		3.152	20.24		5.041	108.185		26.365	25.035		32.535	32.22		8.706	1407.77		8.623	127.036
	24.219	13.504		23.375	8978.16		24.319	274.668		18.104	3290		5.709	33.869		4.705	14169.8		4.653	20948.9		5.041	210.279		3.236	84.163		5.205	51.405		26.845	15.417		32.555	13.799		15.682	404.767		15.682	299.874
	24.323	463.837		23.491	726.281		25.176	637.59		23.39	20405.6		5.813	424.149		4.733	17381.5		4.673	11477.5		5.201	84.202		3.396	3465.12		5.389	40.432		27.349	321.435		32.591	28.766		18.103	3780.46		17.219	119.306
	24.748	348.914		23.723	31.403		25.632	21.189		24.323	700.4		6.89	997.54		4.753	13053.3		4.725	31196		5.389	143.842		3.476	3060.61		5.513	619.742		27.413	85.856		32.627	10.205		23.371	13413.1		18.096	3464.05
	24.844	106.665		24.223	16.254		25.756	18.811		25.183	627.932		8.255	38.163		5.405	13481.7		4.737	5988.2		5.509	1080.54		3.788	395.685		5.709	47.46		27.621	138.417		32.655	14.065		23.483	904.144		23.37	10152.3
	25.188	141.311		24.319	738.21		26.253	405.642		25.56	15.924		8.631	67.797		5.818	381.084		5.057	55.345		5.709	76.708		4.088	28.411		5.809	396.261		28.198	26.503		32.679	12.967		24.315	298.947		23.478	767.098
	25.332	39.416		24.411	10.09		26.901	20.403		25.632	23.329		15.687	453.584		8.635	34.146		5.213	19.804		5.809	343.854		4.316	580.125		6.322	607.243		31.912	24.143		32.739	19.475		24.7	55.756		24.319	221.709
	25.628	22.028		24.751	285.754		26.937	79.054		25.756	17.608		18.104	3337.74		15.671	128.238		5.402	10526.6		6.322	541.068		4.845	18.952		6.886	1028.86		31.948	14.034		32.783	14.114		24.748	314		24.691	157.268
	25.756	18.252		24.843	79.893		27.041	10.069		25.864	13.123		23.391	18856.1		15.691	262.154		5.518	313.303		6.89	1873.87		4.853	27.91		7.026	28.531		32.012	18.204		32.847	15.38		24.848	90.149		25.179	746.533
	25.824	361.962		25.18	412.517		27.349	450.164		26.256	1755.34		23.771	27.002		15.851	567.132		5.818	429.862		7.386	21.409		5.045	248.141		8.227	204.752		32.112	10.491		33.059	10.691		25.184	117.196		25.34	16.843
	25.908	31.266		25.332	29.114		28.202	101.58		26.848	28.514		24.223	11.044		16.127	185.414		6.89	562.715		8.235	175.17		5.197	101.293		8.623	21892		32.132	10.884		33.167	16.385		25.336	22.554		25.628	21.668
	25.928	64.439		25.56	18.291		28.462	13.013		26.892	24.467		24.319	756.922		18.104	2977.74		8.263	82.873		8.623	20225.9		5.513	1183.47		8.631	17766.9		32.204	10.707		33.231	22.723		25.636	23.558		25.716	11.732
	26.256	838.572		25.632	32.002		31.908	10.859		26.94	156.458		25.18	383.775		19.037	72.429		14.267	41.937		8.687	1889.65		5.705	91.988		8.711	3250.2		32.292	10.546		33.283	15.05		25.752	18.315		25.756	23.749
	26.801	10.972		25.756	20.255		32.288	15.38		27.036	13.004		25.556	15.546		23.371	9772.33		14.403	219.807		8.731	16976.5		5.809	460.637		9.139	65.921		32.304	15.094		33.327	11.393		25.812	3106.88		26.252	438.405
	26.845	22.945		25.82	719.223		32.908	10.194		27.349	1004.63		25.632	26.869		24.215	10.354		15.684	503.581		8.743	8495.48		6.329	402.12		13.381	124.972		32.336	14.088		33.427	29.4		26.012	51.913		26.796	10.573
	27.013	23.595		25.94	57.928		33.048	10.125		27.621	11.433		25.756	25.401		24.323	3252.19		15.852	347.681		9.135	115.107		6.545	30.606		15.679	324.995		32.368	14.103		33.444	16.246		26.252	465.849		26.888	25.207
	27.349	334.322		26.252	1719.11		33.088	10.804		28.201	95.856		25.912	12.099		24.475	23.95		16.136	138.436		13.369	356.637		6.742	28.222		18.1	3594.19		32.44	10.501		33.488	50.32		26.797	11.555		26.936	244.997
	27.433	19.649		26.797	12.63		33.409	12.381		32.015	10.655		26.252	1724.54		24.752	195.557		18.105	2963.61		13.906	114.931		6.89	2245.26		23.307	18.461		32.516	12.228		33.54	60.407		26.849	21.67		27.041	20.35
	28.201	43.397		26.849	50.771		33.493	42.629		32.023	10.232		26.369	22.394		24.852	46.116		23.376	11340.9		15.687	307.089		7.026	49.91		23.367	835.412		32.544	17.047		33.576	47.975		27.349	484.919		27.349	360.697
	31.051	12.013		26.885	18.462		33.545	18.297		32.192	16.691		26.621	17.159		24.956	29.356		23.8	23.424		18.1	3419.22		8.226	121.42		23.399	1781.08		32.568	12.681		33.632	45.162		27.417	60.353		27.621	42.535
	31.912	13.385		26.933	783.398		33.669	11.512		32.304	13.649		26.845	34.433		25.18	640.444		24.224	12.305		19.013	152.413		8.611	4293.71		23.491	382.682		32.588	16.149		33.66	24.864		27.617	13.108		28.105	60.637
	32.096	14.385		27.085	19.596		33.701	13.591		32.412	10.583		26.957	59.517		25.332	43.118		24.321	2908.69		23.303	37.491		8.687	1610.21		24.32	286.514		32.616	15.427		33.716	39.219		28.198	69.162		28.197	70.12
	32.328	13.087		27.101	59.327		33.853	15.126		32.46	21.595		27.349	781.036		25.56	115.214		24.477	46.826		23.379	13987.5		8.711	6581.79		24.392	19.272		32.664	11.009		33.736	28.889		28.898	10.099		28.901	13.326
	32.488	10.542		27.349	1861.73		33.917	13.079		32.62	15.665		27.417	73.745		25.628	37.275		24.749	1243.04		23.631	62.043		9.143	103.876		24.416	25.913		32.704	10.053		33.78	19.65		29.775	25.35		29.774	25.525
	32.58	23.928		27.625	17.76		34.369	17.379		32.648	10.393		28.198	52.143		25.716	11.62		24.845	183.9		23.671	40.1		13.394	42.942		24.756	12.172		32.732	11.382		33.804	21.957		31.043	15.275		31.495	10.46
	32.708	12.606		27.741	41.531		34.461	11.733		32.672	23.37		31.919	12.479		25.756	14.564		24.953	15.014		23.715	34.36		13.906	112.05		24.864	21.663		33.005	20.4		33.9	36.679		31.492	15.598		31.815	10.579
	32.748	19.102		28.105	118.556		34.677	10.148		32.936	10.13		32.004	14.749		25.864	12.604		25.181	432.841		23.751	12.872		15.671	161.969		24.908	31.44		33.028	12.73		33.924	24.85		31.908	17.028		32.367	14.98
	32.764	15.05		28.197	642.927		34.781	20.479		33.044	20.922		32.292	12.319		26.257	9988.24		25.329	91.846		24.319	285.736		15.683	258.403		24.972	21.955		33.048	15.105		33.976	53.532		32.316	15.57		32.387	11.88
	32.776	15.445		28.898	32.142		34.857	12.66		33.148	16.268		32.412	18.209		26.413	35.218		25.561	107.216		24.752	53.822		18.1	3437.17		25.02	16.042		33.073	25.519		34.02	77.253		32.424	16.344		32.924	25.763
	32.8	17.666		31.047	15.397		35.27	10.452		33.22	13.128		32.464	13.088		26.617	131.38		25.633	26.774		24.84	65.78		23.327	31.272		25.052	105.917		33.096	42.118		34.068	65.528		32.576	11.74		32.948	59.087
	32.828	17.698		32.284	12.209		35.438	11.857		33.304	11.433		32.5	23.206		26.849	502.14		25.753	18.053		24.904	18.702		23.411	502.422		25.112	136.798		33.136	28.424		34.088	60.504		32.588	22.12		32.972	24.536
	32.844	17.675		32.3	14.898		35.61	15.178		33.376	16.811		32.532	27.378		26.885	150.662		25.865	13.235		24.98	16.711		23.499	187.558		25.176	23.267		33.153	10.354		34.128	56.739		32.696	10.67		33.008	62.767
	32.88	16.052		32.324	11.83		35.654	12.288		33.452	11.415		32.548	19.79		26.937	375.91		25.909	14.85		25.024	25.72		24.32	409.396		25.232	23.153		33.181	21.493		34.188	50.98		32.72	20.154		33.04	57.734
	33	13.189		32.34	10.655		35.666	14.481		33.476	12.714		32.58	29.784		27.349	13329.8		26.253	12722.3		25.052	134.542		24.432	13.581		25.3	53.771		33.208	10.554		34.216	55.617		32.76	17.279		33.056	57.242
	33.1	11.675		32.36	19.333		35.738	10.239		33.492	10.169		32.612	36.728		27.737	541.229		26.414	35.93		25.124	19.673		24.752	184.728		25.56	17.037		33.232	25.88		34.252	38.389		32.772	12.061		33.108	108.902
	33.356	17.398		32.4	27.625		36.01	12.42		33.508	16.347		32.636	12.412		28.197	3185.4		26.618	128.147		25.228	20.832		24.848	26.244		25.624	50.746		33.264	21.053		34.288	18.622		32.808	22.079		33.156	164.505
	33.368	14.218		32.416	18.816		36.122	11.733		33.54	23.832		32.676	32.583		28.317	33.032		26.846	480.59		25.3	97.445		24.908	13.17		25.825	310.639		33.305	15.998		34.312	36.806		32.864	13.984		33.184	80.626
	33.38	27.659		32.448	21.439		36.146	19.589		33.564	27.864		32.688	21.018		28.482	23.245		26.942	149.109		25.556	17.083		25.02	23.393		26.073	42.61		33.437	10.18		34.356	46.424		32.888	13.718		33.216	90.291
	33.424	38.153		32.48	25.606		36.394	15.499		33.588	24.821		32.708	11.367		28.902	166.943		26.978	86.808		25.624	34.083		25.052	172.181		26.253	2577.62		33.465	14.836		34.408	11.836		32.996	47.86		33.24	92.135
	33.444	16.018		32.5	28.692		36.51	16.629		33.596	33.62		32.736	22.327		29.518	17.235		27.042	102.539		25.752	11.699		25.117	57.979		26.613	5290.24		33.485	17.731		34.444	11.791		33.02	32.401		33.26	83.465
	33.46	18.405		32.528	35.259		36.566	13.512		33.628	19.613		32.756	16.986		31.491	12.418		27.098	92.322		25.812	5608.31		25.229	66.969		26.845	156.417		33.533	16.365		34.488	14.499		33.032	26.533		33.284	145.195
	33.484	16.149		32.544	31.898		37.079	11.451		33.648	28.982		32.772	19.101		31.903	11.753		27.35	8866.63		26.024	30.436		25.301	116.222		27.349	4061.76		33.561	14.468		34.528	25.116		33.052	45.553		33.312	92.897
	33.504	15.112		32.556	41.229		37.155	12.762		33.676	41.882		32.816	17.903		32.295	12.931		27.738	139.386		26.072	76.767		25.557	15.004		27.417	306.947		33.589	11.678		34.584	27.295		33.068	45.567		33.328	92.568
	33.592	10.709		32.592	40.32		37.379	12.165		33.696	24.029		32.84	11.925		32.327	11.976		28.198	1310.95		26.253	3932.76		25.629	47.906		27.621	112.441		33.673	22.732		34.612	36.675		33.1	62.906		33.36	178.53
	33.725	17.52		32.624	63.134		37.399	15.218		33.721	17.363		32.956	26.029		32.568	12.495		28.899	85.341		26.617	9836.64		25.817	989.324		27.738	32.659		33.701	27.772		34.656	30.433		33.12	69.432		33.392	159.962
	33.741	14.164		32.652	55.281		37.423	10.337		33.736	48.89		33.004	28.231		32.76	15.722		29.519	10.401		26.845	69.327		25.909	63.277		27.778	10.09		33.725	13.441		34.716	25.751		33.136	58.669		33.428	147.085
	33.765	15.868		32.692	33.708		37.435	15.711		33.777	22.77		33.052	25.224		33.04	14.95		31.492	10.994		27.349	3637.97		25.941	32.391		28.198	625.954		33.753	18.85		34.744	15.473		33.156	48.137		33.444	114.449
	33.797	18.032		32.704	44.549		37.463	16.958		33.797	18.662		33.072	14.61		33.092	18.177		32.201	14.36		27.621	104.406		25.977	51.515		28.902	58.185		33.769	12.889		34.78	21.241		33.184	85.038		33.468	117.039
	33.825	30.81		32.732	33.477					33.817	46.864		33.108	11.575		33.116	16.701		32.625	28.115		27.737	18.257		26.021	12.6		30.071	15.552		33.841	14.98		34.884	26.678		33.192	58.467		33.48	121.213
	33.873	14.889		32.748	52.575					33.861	23.33		33.208	10.531		33.136	17.334		32.793	10.833		28.198	600.894		26.073	45.756		30.579	10.584		33.897	17.54		35	31.787		33.212	59.749		33.516	177.738
	34.129	15.13		32.776	29.671					33.877	26.48		33.224	11.215		33.156	20.941		32.829	16.921		28.902	70.78		26.253	12171.4		31.052	15.426		33.941	10.171		35.081	28.162		33.252	165.821		33.528	104.777
	34.145	12.039		32.792	30.502					33.909	42.795		33.308	17.151		33.192	30.549		32.853	25.581		29.518	18.538		26.385	42.072		31.492	29.927		33.957	11.428		35.14	13.242		33.272	75.589		33.552	134.937
	34.285	22.722		32.816	49.878					33.941	14.599		33.36	18.547		33.212	33.233		32.877	19.466		31.051	12.05		26.421	38.684		31.564	15.405		33.977	18.98		35.172	26.577		33.292	99.099		33.564	106.291
	34.321	12.693		32.832	61.338					33.969	44.548		33.4	13.523		33.232	37.413		32.897	16.027		31.727	10.83		26.457	34.383		31.668	14.418		34.113	19.699		35.301	13.287		33.316	141.722		33.588	134.149
	34.397	11.61		32.856	44.004					34.001	14.081		33.416	13.136		33.268	17.548		32.925	41.377		31.779	14.455		26.481	18.212		31.708	19.527		34.141	17.114		35.425	12.219		33.36	250.7		33.604	107.908
	34.453	10.615		32.9	50.143					34.029	29.851		33.524	19.598		33.28	24.681		32.961	48.362		31.815	12.939		26.549	93.727		31.808	13.606		34.173	13.745		35.461	16.485		33.388	148.733		33.62	80.755
	34.621	19.424		32.916	55.603					34.049	19.442		33.568	24.03		33.32	46.48		33.005	100.624		31.903	20.119		26.617	10735		31.86	15.108		34.289	16.856		35.477	20.996		33.424	273.523		33.644	271.836
	34.653	14.137		32.936	45.349					34.089	24.512		33.584	33.166		33.352	79.399		33.021	32.674		31.995	15.34		26.846	181.487		31.908	18.279		34.313	13.546		35.549	30.729		33.441	143.277		33.668	101.299
	34.669	12.317		32.956	38.231					34.113	22.408		33.616	24.283		33.392	38.393		33.033	47.671		32.063	12.48		26.978	13.355		32.092	14.708		34.329	11.549		35.601	12.451		33.457	114.684		33.684	122.435
	34.753	17.131		32.972	46.352					34.133	14.627		33.636	20.408		33.412	43.301		33.049	45.368		32.183	19.555		27.138	11.062		32.237	10.674		34.353	29.423		35.681	10.302		33.481	144.792		33.744	296.518
	34.769	10.115		33	69.223					34.149	21.526		33.676	24.138		33.432	42.422		33.069	45.16		32.223	22.753		27.346	9649.84		32.289	33.331		34.409	10.091		35.729	27.905		33.509	211.304		33.756	100.805
	34.809	10.054		33.02	82.205					34.173	17.851		33.696	31.14		33.452	32.939		33.081	34.733		32.239	23.188		27.51	35.049		32.329	10.041		34.429	13.329		35.801	37.898		33.553	412.424		33.776	179.067
	34.909	15.685		33.056	60.94					34.205	11.568		33.744	16.738		33.468	50.729		33.113	120.092		32.272	12.678		27.622	98.054		32.381	12.605		34.441	19.877		35.845	36.94		33.577	200.4		33.8	100.599
	35.029	30.924		33.076	53.301					34.221	21.806		33.8	19.015		33.484	52.947		33.129	57.245		32.424	13.697		27.738	156.471		32.417	18.162		34.461	17.673		35.885	17.712		33.601	171.599		33.816	93.38
	35.049	13.509		33.108	94.022					34.241	25.376		33.825	17.654		33.508	24.879		33.149	58.641		32.504	43.426		28.118	13.813		32.445	17.919		34.509	14.485		35.973	13.613		33.621	129.028		33.836	191.89
	35.073	10.71		33.124	44.328					34.265	15.205		33.849	16.143		33.52	36.43		33.181	186.073		32.532	11.495		28.134	17.543		32.493	38.382		34.589	12.716		36.009	29.305		33.645	284.966		33.868	112.224
	35.113	10.303		33.144	54.731					34.281	16.607		33.881	20.588		33.544	56.611		33.233	213.795		32.544	39.444		28.198	4022.5		32.521	41.967		34.738	12.976		36.061	58.175		33.673	88.588		33.888	91.542
	35.181	12.235		33.16	51.063					34.301	14.531		34.109	15.652		33.56	44.698		33.257	80.94		32.568	36.024		28.482	31.509		32.561	19.31		34.934	11.835		36.113	15.947		33.681	89.698		33.9	94.163
	35.309	12.471		33.176	53.88					34.325	23.234		34.157	17.824		33.588	95.975		33.273	83.741		32.592	92.128		28.899	612.401		32.601	41.111		34.97	10.263		36.201	13.269		33.701	150.602		33.916	95.549
	35.341	12.253		33.2	91.787					34.353	12.862		34.293	29.021		33.62	49.059		33.289	132.086		32.628	63.125		29.519	65.527		32.633	16.146		35.006	14.977		36.229	15.111		33.721	238.31		33.932	89.367
	35.465	14.547		33.232	105.56					34.369	15.777		34.333	21.208		33.652	49.791		33.317	111.162		32.648	59.793		30.079	11.732		32.685	24.604		35.05	14.492		36.265	22.288		33.753	171.667		33.956	201.726
	35.57	12.373		33.272	110.768					34.393	17.023		34.465	18.688		33.688	90.836		33.337	113.337		32.668	62.213		30.584	11.226		32.721	17.092		35.126	11.092		36.329	24.28		33.777	226.933		33.988	156.46
	35.67	15.026		33.288	57.957					34.637	16.492		34.497	17.555		33.716	48.234		33.365	171.98		32.68	47.586		30.968	12.167		32.765	35.847		35.202	16.394		36.405	16.452		33.805	113.306		34.008	67.381
	35.794	14.594		33.32	180.041					34.697	16.006		34.521	11.68		33.749	40.234		33.381	128.253		32.708	76.466		31.052	14.538		32.797	27.235		35.226	12.4		36.465	39.329		33.829	284.572		34.024	88.293
	35.906	12.26		33.348	55.757					34.729	10.884		34.641	15.632		33.76	23.052		33.405	103.315		32.728	63.153		31.492	17.776		32.873	27.591		35.326	26.966		36.521	35.414		33.857	82.377		34.052	219.582
	35.926	13.054		33.376	107.265					34.753	10.112		34.781	14.892		33.792	48.551		33.425	158.288		32.748	82.102		31.6	12.202		32.901	12.243		35.366	20.107		36.605	24.065		33.869	104.839		34.092	146.98
	36.018	15.115		33.428	235.205					34.869	11.159		34.845	16.021		33.808	24.242		33.441	134.807		32.764	42.281		31.636	11.315		32.921	12.806		35.386	12.333		36.666	50.906		33.885	123.847		34.112	98.623
	36.046	15.789		33.464	120.615					35.053	16.725		34.905	20.462		33.836	39.855		33.469	164.548		32.784	55.883		31.7	15.398		32.977	14.853		35.422	14.606		36.71	44.437		33.909	172.434		34.132	181.88
	36.262	15.454		33.476	75.389					35.089	11.989		34.921	15.236		33.861	23.268		33.489	146.245		32.804	79.036		31.728	24.961		32.997	44.899		35.474	15.266		36.766	20.693		33.937	100.028		34.172	112.373
	36.538	15.809		33.496	91.394					35.129	11.505		34.997	16.479		33.889	26.777		33.513	178.435		32.816	47.227		31.744	18.337		33.081	92.849		35.498	15.715		36.794	12.504		33.949	187.725		34.196	209.052
	36.682	15.053		33.516	70.477					35.309	10.08		35.025	14.206		33.913	21.053		33.533	151.841		32.836	110.529		31.785	53.597		33.113	77.294		35.526	15.913		36.834	29.986		33.985	108.508		34.236	110.62
	36.814	15.342		33.536	71.834					35.482	24.672		35.057	15.097		33.933	17.155		33.557	222.109		32.868	96.381		31.804	26.036		33.133	43.797		35.69	12.575		36.886	28.339		34.005	134.954		34.256	53.972
	36.918	11.645		33.548	96.752					35.69	14.297		35.089	11.876		33.969	29.956		33.585	189.949		32.888	88.726		31.82	38.356		33.189	98.622		35.714	20.766		36.922	19.696		34.033	233.221		34.268	72.358
	36.942	16.931		33.56	93.7					35.862	10.841		35.121	11.547		34.149	13.621		33.605	160.16		32.908	45.948		31.836	39.163		33.205	66.018		35.762	12.508		36.954	15.604		34.077	99.763		34.284	106.416
	36.966	16.146		33.588	92.023					35.882	15.209		35.297	11.319		34.289	16.241		33.633	284.466		32.924	110.933		31.853	23.585		33.237	76.54		35.81	14.573		37.042	29.427		34.089	41.492		34.308	85.502
	36.99	12.319		33.6	55.146					35.926	12.733		35.333	13.439		34.321	12.489		33.661	125.23		32.948	45.639		31.877	45.821		33.269	67.353		35.834	23.127		37.154	46.628		34.101	80.178		34.34	161.662
	37.01	14.68		33.612	55.066					35.95	11.456		35.385	10.676		34.377	24.427		33.669	93.289		32.968	92.468		31.908	147.945		33.297	105.29		36.006	15.084		37.186	28.074		34.117	71.316		34.368	62.536
	37.027	16.02		33.624	140.633					36.182	17.76		35.409	12.994		34.425	13.954		33.693	271.044		32.984	87.079		31.94	63.937		33.321	211.437		36.034	14.043		37.226	11.825		34.137	91.748		34.388	94.406
	37.054	20.977		33.66	98.551					36.254	17.399		35.465	17.329		34.485	14.472		33.725	180.542		33.012	75.332		31.961	81.581		33.397	161.784		36.214	16.168		37.294	18.187		34.149	68.364		34.408	90.485
	37.095	12.449		33.68	74.404					36.266	13.991		35.489	11.683		34.553	11.672		33.746	205.451		33.028	46.433		31.993	112.207		33.425	138.769		36.234	11.673		37.466	42.388		34.173	114.796		34.444	96.419
	37.118	28.899		33.7	78.502					36.346	17.867		35.522	12.693		34.653	12.804		33.774	116.289		33.048	91.106		32.017	103.502		33.469	228.477		36.278	19.917					34.193	59.904		34.468	82.863
	37.135	12.167		33.728	50.02					36.414	17.375		35.554	19.155		34.745	12.503		33.794	174.81		33.084	178.222		32.033	71.962		33.505	109.078		36.426	16.981					34.217	76.953		34.484	43.133
	37.179	13.334		33.744	44.765					36.502	13.496		35.694	18.599		34.765	15.186		33.814	139.973		33.12	138.336		32.077	210.681		33.525	163.642		36.454	26.073					34.233	80.534		34.497	69.372
	37.235	10.484		33.756	54.223					36.742	14.69		35.854	15.455		34.821	21.713		33.854	213.922		33.144	35.941		32.129	287.844		33.561	145.4		36.49	16.652					34.253	87.388		34.537	178.444
	37.251	10.149		33.796	78.907					36.89	20.166		35.89	10.67		34.857	18.391		33.874	160.085		33.164	72.092		32.157	205.57		33.581	121.794		36.502	12.151					34.277	74.476		34.569	62.54
	37.267	14.327		33.82	43.152					36.902	16.283		35.934	18.305		34.957	15.2		33.886	104.231		33.176	71.586		32.177	103.538		33.609	126.34		36.526	15.718					34.297	57.169		34.589	76.833
	37.319	20.353		33.828	31.815					36.93	26.087		36.066	16.568		35.017	21.096		33.902	77.029		33.204	64.504		32.213	257.059		33.629	78.109		36.551	15.11					34.313	53.381		34.613	53.4
	37.339	20.556		33.844	27.176					36.95	28.65		36.114	10.199		35.049	19.153		33.922	129.177		33.236	124.119		32.257	392.387		33.641	85.457		36.575	14.048					34.333	104.78		34.629	63.151
	37.403	20.729		33.86	15.998					37.018	14.619		36.15	21.922		35.146	17.663		33.934	100.462		33.26	82.254		32.309	413.375		33.669	67.543		36.635	32.069					34.365	73.126		34.649	65.222
				33.884	28.583					37.046	21.197		36.202	14.175		35.222	12.702		33.97	251.55		33.284	60.427		32.321	201.125		33.689	107.633		36.675	11.952					34.393	54.885		34.673	63.072
				33.904	12.863					37.102	11.519		36.226	11.01		35.246	14.717		33.99	97.542		33.308	98.889		32.345	171.474		33.709	186.933		36.723	18.637					34.409	79.463		34.697	37.784
				33.92	11.299					37.126	13.543		36.246	15.857		35.298	10.751		34.006	71.761		33.344	100.901		32.377	455.072		33.749	77.855		36.895	13.674					34.449	60.6		34.721	59.445
				34.013	13.066					37.435	19.671		36.286	18.372		35.346	18.016		34.026	170.268		33.368	73.869		32.401	291.758		33.777	81.24		36.919	17.335					34.469	55.086		34.753	117.143
				34.085	13.419					37.467	13.25		36.354	57.193		35.47	18.886		34.05	158.874		33.384	58.917		32.421	201.61		33.813	137.907		36.943	19.756					34.497	36.658		34.781	24.532
				34.105	12.056								36.39	35.598		35.534	16.18		34.074	86.883		33.412	56.119		32.453	372.492		33.841	74.464		36.971	13.49					34.513	48.303		34.793	22.477
				34.133	12.63								36.454	21.708		35.634	14.903		34.094	82.789		33.432	75.398		32.477	386.78		33.861	88.819		37.031	12.198					34.537	42.003		34.817	53.883
				34.209	16.586								36.474	25.892		35.838	18.692		34.11	143.001		33.46	58.138		32.497	291.421		33.905	107.036		37.059	34.013					34.561	32.195		34.841	80.002
				34.237	11.289								36.498	15.495		35.866	11.784		34.142	145.046		33.472	42.445		32.525	435.858		33.929	39.545		37.111	21.271					34.597	33.08		34.869	34.51
				34.269	11.402								36.534	40.307		35.882	12.948		34.17	165.678		33.488	41.878		32.565	1004.98		33.953	48.054		37.139	18.418					34.621	33.362		34.885	36.999
				34.453	14.588								36.562	14.207		35.922	15.631		34.202	122.529		33.5	31.471		32.605	348.049		33.969	44.144		37.167	26.782					34.645	14.768		34.901	30.528
				34.549	11.229								36.578	45.028		35.954	16.474		34.222	55.533		33.516	47.029		32.617	558.035		33.997	32.964		37.199	14.614					34.661	30.643		34.925	57.537
				34.681	20.895								36.63	17.328		36.066	13.582		34.238	93.46		33.536	29.888		32.657	276.056		34.029	77.246		37.211	10.446					34.721	11.861		34.957	60.329
				34.713	13.044								36.67	33.233		36.098	13.803		34.254	170.48		33.56	51.114		32.673	284.81		34.066	28.162		37.275	17.484					34.793	10.411		34.993	43.697
				34.729	11.222								36.734	22.866		36.146	10.703		34.294	125.744		33.588	57.131		32.685	435.29		34.098	26.038		37.299	17.811					34.805	20.107		35.005	28.695
				34.749	10.083								36.794	17.315		36.178	26.597		34.322	84.284		33.604	18.043		32.713	356.14		34.114	28.273		37.327	14.871					34.861	14.049		35.025	24.076
				34.957	13.459								36.846	20.788		36.222	27.157		34.338	86.193		33.624	29.526		32.733	287.092		34.15	56.606		37.427	10.021					34.921	11.658		35.041	34.55
				34.985	17.244								36.866	12.908		36.41	19.919		34.358	63.554		33.652	21.464		32.749	371.766		34.25	19.07		37.487	10.631					34.937	14.509		35.069	25.293
				35.005	12.527								36.906	10.551		36.434	13.813		34.382	115.16		33.728	13.296		32.773	732.582		34.278	15.298								34.989	18.065		35.085	29.288
				35.029	14.04								37.034	32.026		36.47	10.741		34.406	132.635		33.744	12.297		32.805	221.055		34.37	13.339								35.001	10.746		35.105	19.982
				35.309	20.238								37.078	30.523		36.482	13.069		34.43	61.495		33.764	32.866		32.821	297.786		34.446	38.335								35.065	24.624		35.137	25.631
				35.337	10.201								37.179	21.836		36.526	14.145		34.446	44.189		33.784	22.641		32.833	448.105		34.466	16.72								35.089	17.592		35.157	18.694
				35.449	13.638								37.239	13.116		36.606	12.046		34.466	77.062		33.8	14.243		32.853	294.797		34.59	10.118								35.174	20.324		35.189	17.472
				35.473	20.672								37.287	15.209		36.63	20.715		34.478	47.053		33.868	41.141		32.877	370.19		34.638	21.748								35.19	23.935		35.205	11.251
				35.489	16.637								37.319	20.219		36.67	13.097		34.494	57.686		33.9	44.561		32.909	445.385		34.666	13.666								35.222	30.302		35.217	12.403
				35.509	13.094								37.347	12.49		36.69	12.887		34.51	53.498		33.932	26.498		32.921	527.344		34.69	21.156								35.262	14.2		35.381	13.684
				35.525	10.955								37.427	12.367		36.734	11.32		34.526	68.832		33.948	18.353		32.949	602.552		34.71	11.064								35.286	10.007		35.401	11.532
				35.557	11.614								37.447	11.853		36.762	10.095		34.546	55.559		33.976	48.374		32.985	443.817		34.762	12.452								35.31	12.334		35.453	15.038
				35.581	11.354											36.778	17.353		34.562	52.674		33.992	16.602		33.001	293.394		34.79	11.066								35.35	11.748		35.649	16.155
				35.657	26.342											36.806	16.8		34.578	72.224		34.008	27.564		33.013	219.69		34.838	39.267								35.366	15.736		35.717	15.984
				35.693	32.702											36.838	10.96		34.606	58.078		34.024	48.3		33.037	454.584		34.874	22.843								35.378	35.511		35.737	10.792
				35.721	11.119											36.883	19.551		34.634	98.359		34.052	54.99		33.061	459.901		34.95	11.405								35.422	43.393		35.769	13.594
				35.926	10.428											36.919	10.329		34.654	52.631		34.08	44.248		33.085	445.444		34.986	29.672								35.434	33.933		35.897	23.145
				36.142	14.892											36.938	12.098		34.682	65.262		34.097	54.855		33.109	367.332		35.022	13.983								35.462	79.79		35.945	14.512
				36.162	12.864											37.127	12.593		34.698	78.764		34.121	61.565		33.121	292.337		35.042	31.371								35.486	54.284		35.981	14.87
				36.242	13.356											37.199	11.883		34.73	75.21		34.157	78.806		33.141	823.413		35.07	15.318								35.514	116.311		36.013	18.08
				36.27	24.527											37.227	10.04		34.754	36.409		34.176	84.829		33.185	519.796		35.114	13.619								35.538	101.9		36.041	29.912
				36.322	11.925											37.283	23.029		34.766	69.911		34.213	46.528		33.209	516.136		35.138	15.215								35.578	103.682		36.065	29.905
				36.334	15.296											37.367	13.541		34.802	41.625		34.225	48.691		33.237	428.035		35.174	25.884								35.602	87.137		36.101	15.651
				36.378	11.846											37.415	13.643		34.826	78.874		34.249	84.457		33.269	354.501		35.194	20.751								35.638	104.374		36.23	14.306
				36.51	11.622											37.435	19.511		34.866	37.061		34.269	71.564		33.289	603.535		35.234	53.021								35.666	45.583		36.274	16.543
				36.642	11.072											37.483	15.657		34.886	40.514		34.293	70.076		33.317	368.645		35.278	32.846								35.69	88.323		36.298	29.605
				36.674	22.272														34.898	39.754		34.301	59.021		33.345	668.58		35.326	60.32								35.706	66.282		36.378	17.54
				36.702	16.675														34.922	39.663		34.329	111.729		33.373	371.433		35.338	28.236								35.734	55.62		36.406	25.372
				36.718	14.408														34.938	28.142		34.357	76.644		33.385	224.223		35.382	40.581								35.754	45.993		36.434	16.569
				36.762	24.299														34.958	25.534		34.373	106.337		33.417	755.057		35.438	48.729								35.77	31.259		36.45	15.21
				36.798	10.915														34.966	28.442		34.425	213.541		33.442	370.457		35.454	19.702								35.782	27.774		36.506	52.009
				36.822	11.423														34.986	40.277		34.457	63.752		33.457	218.468		35.478	26.093								35.798	59.397		36.53	16.031
				36.862	27.886														35.01	44.033		34.477	79.22		33.469	363.064		35.506	23.628								35.83	45.003		36.554	16.896
				36.93	12.081														35.038	50.852		34.505	121.55		33.497	373.106		35.538	41.769								35.846	46.591		36.594	14.052
				36.974	17.171														35.078	22.609		34.525	45.492		33.514	596.827		35.582	13.037								35.89	72.44		36.67	16.692
				37.19	13.499														35.094	24.331		34.537	60.323		33.554	719.753		35.638	23.918								35.914	45.202		36.702	26.704
				37.31	20.712														35.118	26.671		34.553	55.402		33.59	509.724		35.666	30.403								35.942	40.804		36.734	14.502
				37.394	13.214														35.151	17.286		34.573	72.303		33.618	356.532		35.69	29.894								35.97	42.445		36.746	16.492
				37.418	14.693														35.162	12.009		34.601	119.344		33.638	480.493		35.714	20.281								35.986	17.749		36.79	14.486
				37.459	14.347														35.195	17.738		34.621	55.655		33.662	525.557		35.746	77.183								36.01	40.058		36.93	10.369
																			35.227	20.595		34.641	106.482		33.694	251.976		35.794	10.867								36.038	20.488		36.95	18.326
																			35.247	12.168		34.665	92.268		33.714	318.789		35.806	20.084								36.07	36.029		36.974	13.292
																			35.287	15.411		34.697	61.837		33.73	303.08		35.851	31.98								36.09	28.055		37.13	14.851
																			35.563	10.624		34.721	79.533		33.75	182.358		35.903	24.408								36.122	14.426		37.19	14.982
																			35.607	15.365		34.733	76.6		33.766	307.405		35.939	11.083								36.158	15.51		37.198	10.082
																			35.619	12.812		34.765	64.379		33.782	236.671		35.959	13.622								36.23	12.181		37.222	16.4
																			35.643	11.083		34.777	51.872		33.798	338.938		35.995	26.675								36.262	17.491		37.338	14.24
																			35.679	27.003		34.793	72.967		33.826	226.303		36.015	15.65								36.282	13.953		37.354	19.531
																			35.759	14.897		34.829	80.02		33.838	277.701		36.031	10.095								36.318	14.821
																			35.775	13.863		34.849	64.616		33.858	214.626		36.059	20.786								36.342	21.166
																			35.795	15.115		34.865	49.186		33.87	209.42		36.095	22.136								36.394	23.54
																			35.819	24.567		34.881	78.221		33.894	310.837		36.187	38.106								36.51	18.852
																			35.843	14.491		34.917	70.278		33.91	294.772		36.243	35.053								36.526	12.796
																			35.855	15.943		34.933	51.854		33.934	185.019		36.275	11.601								36.542	12.604
																			35.879	10.424		34.961	67.498		33.954	279.882		36.331	20.543								36.562	19.326
																			35.907	16.395		34.977	104.512		33.978	358.32		36.359	17.731								36.598	14.767
																			35.931	23.487		35.013	52.056		34.006	164.284		36.383	11.183								36.622	20.918
																			36.007	19.889		35.037	48.514		34.03	245.649		36.431	16.762								36.714	16.084
																			36.031	17.992		35.065	93.224		34.05	195.392		36.495	13.852								36.726	22.513
																			36.063	18.309		35.097	40.928		34.082	340.886		36.519	11.501								36.77	23.772
																			36.107	16.29		35.133	110.202		34.106	137.351		36.551	12.691								36.778	22.531
																			36.263	18.842		35.169	44.728		34.126	268.348		36.611	24.333								36.81	55.794
																			36.287	11.548		35.181	37.138		34.162	354.288		36.635	23.017								36.838	48.443
																			36.299	14.634		35.197	31.145		34.202	150.339		36.675	25.201								36.886	18.397
																			36.335	13.788		35.229	47.029		34.222	142.099		36.703	11.209								36.906	30.366
																			36.363	24.479		35.241	22.773		34.238	210.819		36.719	11.312								36.922	28.697
																			36.391	15.498		35.249	28.578		34.278	170.834		36.843	20.079								36.954	43.79
																			36.411	12.165		35.269	24.563		34.302	84.523		36.883	14.361								36.974	16.747
																			36.427	14.39		35.281	26.382		34.33	257.062		36.919	14.458								36.994	18.418
																			36.451	25.114		35.325	101.512		34.358	52.882		36.971	44.958								37.006	28.891
																			36.467	12.119		35.353	30.454		34.374	86.079		37.015	23.309								37.034	32.187
																			36.519	10.058		35.373	37.421		34.398	83.387		37.027	29.627								37.062	15.769
																			36.575	10.338		35.389	26.345		34.414	63.085		37.079	15.219								37.086	54.59
																			36.591	13.594		35.401	26.629		34.434	73.721		37.159	17.761								37.126	41.327
																			36.839	21.496		35.425	28.414		34.458	117.608		37.219	10.388								37.154	19.849
																			36.94	15.979		35.437	18.403		34.486	59.613		37.255	22.778								37.187	24.549
																			36.984	13.323		35.453	22.526		34.51	66.422		37.327	13.334								37.198	19.838
																			37.08	13.586		35.465	63.157		34.55	55.174		37.415	16.775								37.214	18.414
																			37.156	10.47		35.505	50.677		34.578	48.958											37.242	37.862
																			37.18	11.977		35.529	23.949		34.602	29.393											37.271	29.027
																			37.204	14.93		35.553	19.48		34.754	23.454											37.295	18.743
																			37.22	11.349		35.573	64.078		34.79	35.614											37.315	25.044
																			37.256	10.104		35.605	35.351		34.822	34.01											37.339	21.989
																			37.384	11.459		35.621	24.235		34.842	98.452											37.359	28.255
																			37.408	24.387		35.637	26.044		34.874	52.732											37.395	35.109
																			37.436	32.782		35.661	30.382		34.898	37.65											37.415	18.249
																						35.697	22.674		34.922	78.724											37.439	20.188
																						35.709	15.936		34.938	79.101											37.463	35.02
																						35.733	44.091		34.962	41.239
																						35.773	11.978		34.978	77.809
																						35.797	12.395		34.99	48.866
																						35.817	25.027		35.018	126.168
																						35.837	27.846		35.054	225.206
																						35.897	20.864		35.09	133.524
																						35.914	12.542		35.106	58.38
																						35.941	13.86		35.19	24.505
																						35.997	13.324		35.299	13.133
																						36.218	19.414		35.323	27.456
																						36.25	14.062		35.347	24.172
																						36.27	12.745		35.395	10.181
																						36.426	22.954		35.423	11.543
																						36.462	30.278		35.471	21.2
																						36.486	17.37		35.487	12.608
																						36.506	16.963		35.507	18.644
																						36.518	13.974		35.651	19.48
																						36.534	13.457		35.683	17.131
																						36.554	35.462		35.711	27.43
																						36.594	10.663		35.723	18.376
																						36.614	14.797		35.763	24.583
																						36.65	15.718		35.799	19.411
																						36.658	11.696		35.819	15.001
																						36.678	19.61		35.843	12.566
																						36.71	28.848		35.891	25.137
																						36.75	13.338		35.911	23.896
																						36.858	34.324		35.943	16.284
																						36.886	22.918		35.999	16.531
																						36.902	28.388		36.019	15.713
																						36.93	11.429		36.047	17.175
																						36.942	19.575		36.067	13.027
																						36.954	18.26		36.079	14.894
																						36.978	37.39		36.091	21.452
																						37.038	21.658		36.123	10.568
																						37.266	21.712		36.135	12.713
																						37.286	15.741		36.183	18.303
																						37.314	11.026		36.207	14.994
																						37.374	29.2		36.227	14.473
																						37.394	10.36		36.251	26.73
																						37.41	19.324		36.271	14.471
																						37.458	25.61		36.295	25.285
																						37.482	15.881		36.303	19.623
																									36.363	18.965
																									36.419	12.554
																									36.447	28.605
																									36.487	25.442
																									36.503	17.112
																									36.579	12.468
																									36.727	28.758
																									36.783	11.905
																									36.819	17.484
																									36.851	25.594
																									36.867	21.023
																									36.964	22.678
																									37.016	14.79
																									37.044	32.486
																									37.06	15.758
																									37.08	30.91
																									37.116	12.067
																									37.2	10.57
																									37.244	11.587
																									37.272	29.229
																									37.364	19.628
																									37.388	12.513
