# Supplementary material for: Metabolite exchange between microbiome members produces compounds that influence Drosophila behavior
Source: eLife. 2017 Jan 9;6:e18855. doi: 10.7554/eLife.18855 (PMC5222558; doi:10.7554/eLife.18855)
Supplement: Figure 5—source data 3. — DOI: http://dx.doi.org/10.7554/eLife.18855.039 [file elife-18855-fig5-data3.xlsx]

## Sheet: Tmaze_Mon_2_22
Experiment #	Fly Strain	Test Arm	Control Arm	Test Side	Time_Experiment	Center Flies	Experiment #	Left side	right side	Left Side RI	Test Arm	Control Arm	Test Arm RI
1	Canton-S (CR)	Mock	Mock	L	08:20:00	5	1	42	28	0.186667	42	28	0.186667	0.0218654
2	Canton-S (CR)	Mock	Mock	R	08:25:00	8	2	40	25	0.205479	25	40	-0.205479
3	Canton-S (CR)	Mock	Mock	L	08:30:00	10	3	40	47	-0.0721649	40	47	-0.0721649
4	Canton-S (CR)	Mock	Mock	R	08:35:00	9	4	37	36	0.0121951	36	37	-0.0121951
5	Canton-S (CR)	Mock	Mock	L	08:40:00	5	5	46	29	0.2125	46	29	0.2125
6	Canton-S (CR)	Mock	Mock	R	08:45:00	4	6	31	36	-0.0704225	36	31	0.0704225
#REF!	Canton-S (CR)	SCAP WT	SCAP ADH	L	#REF!	9	#REF!	54	20	0.409639	54	20	0.409639	0.429628
#REF!	Canton-S (CR)	SCAP WT	SCAP ADH	R	#REF!	10	#REF!	24	69	-0.436893	69	24	0.436893
#REF!	Canton-S (CR)	SCAP WT	SCAP ADH	L	#REF!	1	#REF!	75	26	0.480392	75	26	0.480392
#REF!	Canton-S (CR)	SCAP WT	SCAP ADH	R	#REF!	8	#REF!	31	62	-0.306931	62	31	0.306931
#REF!	Canton-S (CR)	SCAP WT	SCAP ADH	L	#REF!	6	#REF!	50	14	0.514286	50	14	0.514286
#REF!	Canton-S (CR)	SCAP WT	SCAP ADH	R	#REF!	4	#REF!	26	47	-0.272727	47	26	0.272727
#REF!	Canton-S (CR)	SCAP WT	SCAP ADH + esters (SCAM concentration)	L	#REF!	9	#REF!	52	31	0.228261	52	31	0.228261	0.141832
#REF!	Canton-S (CR)	SCAP WT	SCAP ADH + esters (SCAM concentration)	R	#REF!	7	#REF!	33	49	-0.179775	49	33	0.179775
#REF!	Canton-S (CR)	SCAP WT	SCAP ADH + esters (SCAM concentration)	L	#REF!	11	#REF!	50	50	0	50	50	0
#REF!	Canton-S (CR)	SCAP WT	SCAP ADH + esters (SCAM concentration)	R	#REF!	12	#REF!	34	43	-0.101124	43	34	0.101124
#REF!	Canton-S (CR)	SCAP WT	SCAP ADH + esters (SCAM concentration)	L	#REF!	8	#REF!	47	30	0.2	47	30	0.2
#REF!	Canton-S (CR)	SCAP WT	SCAP ADH + esters (SCAM concentration)	R	#REF!	12	#REF!	46	44	0.0196078	44	46	-0.0196078
#REF!	Canton-S (CR)	SCAP WT	SCAP ADH + esters (SCAM concentration) + acid (1.5% final)	L	#REF!	13	#REF!	67	30	0.336364	67	30	0.336364	0.128535
#REF!	Canton-S (CR)	SCAP WT	SCAP ADH + esters (SCAM concentration) + acid (1.5% final)	R	#REF!	9	#REF!	34	47	-0.144444	47	34	0.144444
#REF!	Canton-S (CR)	SCAP WT	SCAP ADH + esters (SCAM concentration) + acid (1.5% final)	L	#REF!	8	#REF!	44	40	0.0434783	44	40	0.0434783
#REF!	Canton-S (CR)	SCAP WT	SCAP ADH + esters (SCAM concentration) + acid (1.5% final)	R	#REF!	10	#REF!	37	36	0.0120482	36	37	-0.0120482
#REF!	Canton-S (CR)	SCAP WT	SCAP ADH + esters (SCAM concentration) + acid (1.5% final)	L	#REF!	10	#REF!	47	35	0.130435	47	35	0.130435
#REF!	Canton-S (CR)	SCAP WT	SCAP ADH + esters (SCAM concentration) + acid (1.5% final)	R	#REF!	12	#REF!	46	31	0.168539	31	46	-0.168539
#REF!	Canton-S (CR)	SCAP WT	SCAP ADH + esters (SCAM concentration) + acetoin (7.5ul/500ul)	L	16:00:00	7	#REF!	34	34	0	34	34	0	0.000784725
#REF!	Canton-S (CR)	SCAP WT	SCAP ADH + esters (SCAM concentration) + acetoin (7.5ul/500ul)	R	16:05:00	9	#REF!	42	45	-0.03125	45	42	0.03125
#REF!	Canton-S (CR)	SCAP WT	SCAP ADH + esters (SCAM concentration) + acetoin (7.5ul/500ul)	L	16:10:00	6	#REF!	52	38	0.145833	52	38	0.145833
#REF!	Canton-S (CR)	SCAP WT	SCAP ADH + esters (SCAM concentration) + acetoin (7.5ul/500ul)	R	16:15:00	11	#REF!	51	39	0.118812	39	51	-0.118812
#REF!	Canton-S (CR)	SCAP WT	SCAP ADH + esters (SCAM concentration) + acetoin (7.5ul/500ul)	L	16:20:00	9	#REF!	39	44	-0.0543478	39	44	-0.0543478
#REF!	Canton-S (CR)	SCAP WT	SCAP ADH + esters (SCAM concentration) + acetoin (7.5ul/500ul)	R	16:25:00	9	#REF!	50	30	0.224719	30	50	-0.224719

## Sheet: Tmaze_Tue_2_23
Experiment #	Fly Strain	Test Arm	Control Arm	Test Side	Time_Experiment	Center Flies	Experiment #	Left side	right side	Left Side RI	Test Arm	Control Arm	Test Arm RI
1	Canton-S (CR)	Mock	Mock	L	08:20:00	1	1	38	44	-0.0722892	38	44	-0.0722892	-0.0281001
2	Canton-S (CR)	Mock	Mock	R	08:25:00	4	2	48	47	0.010101	47	48	-0.010101
3	Canton-S (CR)	Mock	Mock	L	08:30:00	11	3	54	39	0.144231	54	39	0.144231
4	Canton-S (CR)	Mock	Mock	R	08:35:00	6	4	47	39	0.0869565	39	47	-0.0869565
5	Canton-S (CR)	Mock	Mock	L	08:40:00	2	5	45	57	-0.115385	45	57	-0.115385
6	Canton-S (CR)	Mock	Mock	R	08:45:00	8	6	35	31	0.0540541	31	35	-0.0540541
7	Canton-S (CR)	SCAP WT 72 h	SCAP ADH	L	09:00:00	1	7	63	36	0.27	63	36	0.27	0.395667
8	Canton-S (CR)	SCAP WT 72 h	SCAP ADH	R	09:05:00	6	8	34	66	-0.301887	66	34	0.301887
9	Canton-S (CR)	SCAP WT 72 h	SCAP ADH	L	09:10:00	6	9	75	14	0.642105	75	14	0.642105
10	Canton-S (CR)	SCAP WT 72 h	SCAP ADH	R	09:15:00	7	10	27	64	-0.377551	64	27	0.377551
11	Canton-S (CR)	SCAP WT 72 h	SCAP ADH	L	09:20:00	9	11	69	28	0.386792	69	28	0.386792
12	Canton-S (CR)	SCAP WT 72 h	SCAP ADH	R	09:25:00	9	12	13	73	-0.631579	73	13	0.631579
13	Canton-S (CR)	SCAP WT 72 h	SCAP ADH + esters (SCAM concentration)	L	09:50:00	9	13	64	27	0.37	64	27	0.37	0.295515
14	Canton-S (CR)	SCAP WT 72 h	SCAP ADH + esters (SCAM concentration)	R	09:55:00	6	14	39	61	-0.207547	61	39	0.207547
15	Canton-S (CR)	SCAP WT 72 h	SCAP ADH + esters (SCAM concentration)	L	10:00:00	6	15	58	27	0.340659	58	27	0.340659
16	Canton-S (CR)	SCAP WT 72 h	SCAP ADH + esters (SCAM concentration)	R	10:05:00	2	16	25	50	-0.324675	50	25	0.324675
17	Canton-S (CR)	SCAP WT 72 h	SCAP ADH + esters (SCAM concentration)	L	10:10:00	11	17	55	32	0.234694	55	32	0.234694
18	Canton-S (CR)	SCAP WT 72 h	SCAP ADH + esters (SCAM concentration)	R	10:15:00	11	18	28	41	-0.1625	41	28	0.1625
19	Canton-S (CR)	SCAP WT 72 h	SCAP ADH + esters (SCAM concentration) + acid (1.5% final)	L	10:40:00	5	19	57	32	0.265957	57	32	0.265957	0.130604
20	Canton-S (CR)	SCAP WT 72 h	SCAP ADH + esters (SCAM concentration) + acid (1.5% final)	R	10:45:00	4	20	44	50	-0.0612245	50	44	0.0612245
21	Canton-S (CR)	SCAP WT 72 h	SCAP ADH + esters (SCAM concentration) + acid (1.5% final)	L	10:50:00	7	21	45	45	0	45	45	0
22	Canton-S (CR)	SCAP WT 72 h	SCAP ADH + esters (SCAM concentration) + acid (1.5% final)	R	10:55:00	7	22	51	46	0.0480769	46	51	-0.0480769
23	Canton-S (CR)	SCAP WT 72 h	SCAP ADH + esters (SCAM concentration) + acid (1.5% final)	L	11:00:00	10	23	74	31	0.373913	74	31	0.373913
24	Canton-S (CR)	SCAP WT 72 h	SCAP ADH + esters (SCAM concentration) + acid (1.5% final)	R	11:05:00	11	24	40	52	-0.116505	52	40	0.116505
25	Canton-S (CR)	SCAP WT	SCAP ADH + esters (SCAM concentration) + acetoin (7.5ul/500ul)	L	16:00:00	10	#REF!	31	29	0.0285714	31	29	0.0285714	0.0386262
26	Canton-S (CR)	SCAP WT	SCAP ADH + esters (SCAM concentration) + acetoin (7.5ul/500ul)	R	16:05:00	7	#REF!	38	47	-0.0978261	47	38	0.0978261
27	Canton-S (CR)	SCAP WT	SCAP ADH + esters (SCAM concentration) + acetoin (7.5ul/500ul)	L	16:10:00	6	#REF!	51	33	0.2	51	33	0.2
28	Canton-S (CR)	SCAP WT	SCAP ADH + esters (SCAM concentration) + acetoin (7.5ul/500ul)	R	16:15:00	6	#REF!	46	30	0.195122	30	46	-0.195122
29	Canton-S (CR)	SCAP WT	SCAP ADH + esters (SCAM concentration) + acetoin (7.5ul/500ul)	L	16:20:00	9	#REF!	47	41	0.0618557	47	41	0.0618557
30	Canton-S (CR)	SCAP WT	SCAP ADH + esters (SCAM concentration) + acetoin (7.5ul/500ul)	R	16:25:00	10	#REF!	32	45	-0.149425	45	32	0.149425

## Sheet: Tmaze_Thur_2_25
Experiment #	Fly Strain	Test Arm	Control Arm	Test Side	Time_Experiment	Center Flies	Experiment #	Left side	right side	Left Side RI	Test Arm	Control Arm	Test Arm RI
1	Canton-S (CR)	Mock	Mock	L	09:00:00	4	1	50	53	-0.0280374	50	53	-0.0280374	-0.0128998
2	Canton-S (CR)	Mock	Mock	R	09:05:00	9	2	60	41	0.172727	41	60	-0.172727
3	Canton-S (CR)	Mock	Mock	L	09:10:00	8	3	51	41	0.1	51	41	0.1
4	Canton-S (CR)	Mock	Mock	R	09:15:00	16	4	46	37	0.0909091	37	46	-0.0909091
5	Canton-S (CR)	Mock	Mock	L	09:20:00	9	5	47	32	0.170455	47	32	0.170455
6	Canton-S (CR)	Mock	Mock	R	09:25:00	6	6	44	39	0.0561798	39	44	-0.0561798
7	Canton-S (CR)	SCAP WT 72 h	SCAP ADH	L	09:55:00	2	7	66	22	0.488889	66	22	0.488889	0.364461
8	Canton-S (CR)	SCAP WT 72 h	SCAP ADH	R	10:00:00	6	8	30	59	-0.305263	59	30	0.305263
9	Canton-S (CR)	SCAP WT 72 h	SCAP ADH	L	10:05:00	7	9	67	32	0.330189	67	32	0.330189
10	Canton-S (CR)	SCAP WT 72 h	SCAP ADH	R	10:10:00	8	10	30	45	-0.180723	45	30	0.180723
11	Canton-S (CR)	SCAP WT 72 h	SCAP ADH	L	10:15:00	8	11	76	21	0.52381	76	21	0.52381
12	Canton-S (CR)	SCAP WT 72 h	SCAP ADH	R	10:20:00	11	12	25	59	-0.357895	59	25	0.357895
13	Canton-S (CR)	SCAP WT 72 h	SCAP ADH + esters (SCAM concentration) no ethyl acetate	L	10:50:00	8	13	62	29	0.333333	62	29	0.333333	0.270584
14	Canton-S (CR)	SCAP WT 72 h	SCAP ADH + esters (SCAM concentration) no ethyl acetate	R	10:55:00	2	14	34	66	-0.313725	66	34	0.313725
15	Canton-S (CR)	SCAP WT 72 h	SCAP ADH + esters (SCAM concentration) no ethyl acetate	L	11:00:00	9	15	68	43	0.208333	68	43	0.208333
16	Canton-S (CR)	SCAP WT 72 h	SCAP ADH + esters (SCAM concentration) no ethyl acetate	R	11:05:00	7	16	35	63	-0.266667	63	35	0.266667
17	Canton-S (CR)	SCAP WT 72 h	SCAP ADH + esters (SCAM concentration) no ethyl acetate	L	11:10:00	9	17	68	32	0.330275	68	32	0.330275
18	Canton-S (CR)	SCAP WT 72 h	SCAP ADH + esters (SCAM concentration) no ethyl acetate	R	11:15:00	10	18	41	60	-0.171171	60	41	0.171171
19	Canton-S (CR)	SCAP WT 72 h	SCAP ADH + esters (SCAM concentration)	L	11:45:00	10	19	58	50	0.0677966	58	50	0.0677966	0.072129
20	Canton-S (CR)	SCAP WT 72 h	SCAP ADH + esters (SCAM concentration)	R	11:50:00	8	20	39	39	0	39	39	0
21	Canton-S (CR)	SCAP WT 72 h	SCAP ADH + esters (SCAM concentration)	L	11:55:00	8	21	46	34	0.136364	46	34	0.136364
22	Canton-S (CR)	SCAP WT 72 h	SCAP ADH + esters (SCAM concentration)	R	12:00:00	12	22	47	54	-0.0619469	54	47	0.0619469
23	Canton-S (CR)	SCAP WT 72 h	SCAP ADH + esters (SCAM concentration)	L	12:05:00	9	23	60	39	0.194444	60	39	0.194444
24	Canton-S (CR)	SCAP WT 72 h	SCAP ADH + esters (SCAM concentration)	R	12:10:00	11	24	50	47	0.0277778	47	50	-0.0277778
25	Canton-S (CR)	SCAP WT 72 h	SCAP ADH + esters (SCAM concentration) + acid (1.5% final)	L	12:40:00	5	25	51	45	0.0594059	51	45	0.0594059	-0.0444173
26	Canton-S (CR)	SCAP WT 72 h	SCAP ADH + esters (SCAM concentration) + acid (1.5% final)	R	12:45:00	7	26	51	49	0.0186916	49	51	-0.0186916
27	Canton-S (CR)	SCAP WT 72 h	SCAP ADH + esters (SCAM concentration) + acid (1.5% final)	L	12:50:00	5	27	60	54	0.0504202	60	54	0.0504202
28	Canton-S (CR)	SCAP WT 72 h	SCAP ADH + esters (SCAM concentration) + acid (1.5% final)	R	12:55:00	6	28	65	51	0.114754	51	65	-0.114754
29	Canton-S (CR)	SCAP WT 72 h	SCAP ADH + esters (SCAM concentration) + acid (1.5% final)	L	13:00:00	5	29	40	48	-0.0860215	40	48	-0.0860215
30	Canton-S (CR)	SCAP WT 72 h	SCAP ADH + esters (SCAM concentration) + acid (1.5% final)	R	13:05:00	8	30	55	39	0.156863	39	55	-0.156863
31	Canton-S (CR)	SCAP WT	SCAP ADH + esters (SCAM concentration) + acetoin (7.5ul/500ul)	L	#REF!	7	#REF!	32	50	-0.202247	32	50	-0.202247	0.00879085
32	Canton-S (CR)	SCAP WT	SCAP ADH + esters (SCAM concentration) + acetoin (7.5ul/500ul)	R	#REF!	5	#REF!	35	62	-0.264706	62	35	0.264706
33	Canton-S (CR)	SCAP WT	SCAP ADH + esters (SCAM concentration) + acetoin (7.5ul/500ul)	L	#REF!	6	#REF!	47	40	0.0752688	47	40	0.0752688
34	Canton-S (CR)	SCAP WT	SCAP ADH + esters (SCAM concentration) + acetoin (7.5ul/500ul)	R	#REF!	9	#REF!	60	48	0.102564	48	60	-0.102564
