# Supplementary material for: Metabolite exchange between microbiome members produces compounds that influence Drosophila behavior
Source: eLife. 2017 Jan 9;6:e18855. doi: 10.7554/eLife.18855 (PMC5222558; doi:10.7554/eLife.18855)
Supplement: Figure 6—figure supplement 1—source data 1. — DOI: http://dx.doi.org/10.7554/eLife.18855.045 [file elife-18855-fig6-figsupp1-data1.xlsx]

## Sheet: 11_18_15
Experiment #	Fly Strain	Test Arm	Control Arm	Test Side	Time_Experiment	Center Flies	Experiment #	Left side	right side	Left Side RI	Test Arm	Control Arm	Test Arm RI
1	Canton-S (CR)	Mock	Mock	L	08:30:00	9	1	38	25	0.180556	38	25	0.180556	0.0270189
2	Canton-S (CR)	Mock	Mock	R	08:35:00	6	2	37	25	0.176471	25	37	-0.176471
3	Canton-S (CR)	Mock	Mock	L	08:40:00	7	3	27	30	-0.046875	27	30	-0.046875
4	Canton-S (CR)	Mock	Mock	R	08:45:00	3	4	28	21	0.134615	21	28	-0.134615
5	Canton-S (CR)	Mock	Mock	L	08:50:00	9	5	36	19	0.265625	36	19	0.265625
6	Canton-S (CR)	Mock	Mock	R	08:55:00	7	6	25	25	0	25	25	0
7	Canton-S (CR)	SCAP WT	SC + Ap Wt	L	09:45:00	2	7	46	15	0.492063	46	15	0.492063	0.333752
8	Canton-S (CR)	SCAP WT	Sc + Ap WT	R	09:50:00	1	8	31	42	-0.148649	42	31	0.148649
9	Canton-S (CR)	SCAP WT	Sc + Ap WT	L	09:55:00	2	9	39	28	0.15942	39	28	0.15942
10	Canton-S (CR)	SCAP WT	Sc + Ap WT	R	10:00:00	4	10	20	48	-0.388889	48	20	0.388889
11	Canton-S (CR)	SCAP WT	Sc + Ap WT	L	10:05:00	6	11	41	16	0.396825	41	16	0.396825
12	Canton-S (CR)	SCAP WT	Sc + Ap WT	R	10:10:00	0	12	21	51	-0.416667	51	21	0.416667
13	Canton-S (CR)	SCAP PQQ-ADH	SC + Ap Wt	L	09:45:00	7	13	32	25	0.109375	32	25	0.109375	-0.00767224
14	Canton-S (CR)	SCAP PQQ-ADH	Sc + Ap WT	R	09:50:00	5	14	29	30	-0.015625	30	29	0.015625
15	Canton-S (CR)	SCAP PQQ-ADH	Sc + Ap WT	L	09:55:00	9	15	21	28	-0.12069	21	28	-0.12069
16	Canton-S (CR)	SCAP PQQ-ADH	Sc + Ap WT	R	10:00:00	6	16	26	36	-0.147059	36	26	0.147059
17	Canton-S (CR)	SCAP PQQ-ADH	Sc + Ap WT	L	10:05:00	5	17	24	41	-0.242857	24	41	-0.242857
18	Canton-S (CR)	SCAP PQQ-ADH	Sc + Ap WT	R	10:10:00	6	18	18	20	-0.0454545	20	18	0.0454545
19	Canton-S (CR)	SCAP PQQ-ADH + 0.75% acetald + 3% acet acid	SC + Ap Wt	L	10:35:00	9	19	48	8	0.615385	48	8	0.615385	0.346751
20	Canton-S (CR)	SCAP PQQ-ADH + 0.75% acetald + 3% acet acid	Sc + Ap WT	R	10:40:00	10	20	23	33	-0.151515	33	23	0.151515
21	Canton-S (CR)	SCAP PQQ-ADH + 0.75% acetald + 3% acet acid	Sc + Ap WT	L	10:45:00	7	21	53	27	0.298851	53	27	0.298851
22	Canton-S (CR)	SCAP PQQ-ADH + 0.75% acetald + 3% acet acid	Sc + Ap WT	R	10:50:00	5	22	20	48	-0.383562	48	20	0.383562
23	Canton-S (CR)	SCAP PQQ-ADH + 0.75% acetald + 3% acet acid	Sc + Ap WT	L	10:55:00	3	23	55	16	0.527027	55	16	0.527027
24	Canton-S (CR)	SCAP PQQ-ADH + 0.75% acetald + 3% acet acid	Sc + Ap WT	R	11:00:00	11	24	16	21	-0.104167	21	16	0.104167
25	Canton-S (CR)	SCAP PQQ-ADH +0.75% acetald	SC + Ap Wt	L	11:25:00	11	25	40	22	0.246575	40	22	0.246575	0.25568
26	Canton-S (CR)	SCAP PQQ-ADH + 0.75% acetald	Sc + Ap WT	R	11:30:00	8	26	22	48	-0.333333	48	22	0.333333
27	Canton-S (CR)	SCAP PQQ-ADH + 0.75% acetald	Sc + Ap WT	L	11:35:00	4	27	57	14	0.573333	57	14	0.573333
28	Canton-S (CR)	SCAP PQQ-ADH + 0.75% acetald	Sc + Ap WT	R	11:40:00	6	28	31	24	0.114754	24	31	-0.114754
29	Canton-S (CR)	SCAP PQQ-ADH + 0.75% acetald	Sc + Ap WT	L	11:45:00	12	29	54	21	0.37931	54	21	0.37931
30	Canton-S (CR)	SCAP PQQ-ADH + 0.75% acetald	Sc + Ap WT	R	11:50:00	6	30	16	21	-0.116279	21	16	0.116279
31	Canton-S (CR)	SCAP PQQ-ADH + 3% acet acid	SC + Ap Wt	L	12:15:00	13	31	34	37	-0.0357143	34	37	-0.0357143	0.253132
32	Canton-S (CR)	SCAP PQQ-ADH + 3% acet acid	Sc + Ap WT	R	12:20:00	8	32	19	53	-0.425	53	19	0.425
33	Canton-S (CR)	SCAP PQQ-ADH + 3% acet acid	Sc + Ap WT	L	12:25:00	6	33	49	12	0.552239	49	12	0.552239
34	Canton-S (CR)	SCAP PQQ-ADH + 3% acet acid	Sc + Ap WT	R	12:30:00	5	34	28	28	0	28	28	0
35	Canton-S (CR)	SCAP PQQ-ADH + 3% acet acid	Sc + Ap WT	L	12:35:00	6	35	50	19	0.413333	50	19	0.413333
36	Canton-S (CR)	SCAP PQQ-ADH + 3% acet acid	Sc + Ap WT	R	12:40:00	3	36	24	34	-0.163934	34	24	0.163934

## Sheet: 11_19_15
Experiment #	Fly Strain	Test Arm	Control Arm	Test Side	Time_Experiment	Center Flies	Experiment #	Left side	right side	Left Side RI	Test Arm	Control Arm	Test Arm RI
1	Canton-S (CR)	Mock	Mock	L	08:30:00	11	1	22	34	-0.179104	22	34	-0.179104	-0.0467016
2	Canton-S (CR)	Mock	Mock	R	08:35:00	9	2	36	20	0.246154	20	36	-0.246154
3	Canton-S (CR)	Mock	Mock	L	08:40:00	8	3	36	28	0.111111	36	28	0.111111
4	Canton-S (CR)	Mock	Mock	R	08:45:00	8	4	29	29	0	29	29	0
5	Canton-S (CR)	Mock	Mock	L	08:50:00	12	5	36	21	0.217391	36	21	0.217391
6	Canton-S (CR)	Mock	Mock	R	08:55:00	10	6	35	33	0.025641	33	35	-0.025641
7	Canton-S (CR)	SCAP WT, fresh, top	SC + Ap Wt	L	09:45:00	7	7	45	25	0.25974	45	25	0.25974	0.293181
8	Canton-S (CR)	SCAP WT, fresh, top	Sc + Ap WT	R	09:50:00	6	8	18	43	-0.373134	43	18	0.373134
9	Canton-S (CR)	SCAP WT, fresh, top	Sc + Ap WT	L	09:55:00	3	9	45	30	0.192308	45	30	0.192308
10	Canton-S (CR)	SCAP WT, fresh, top	Sc + Ap WT	R	10:00:00	6	10	23	39	-0.235294	39	23	0.235294
11	Canton-S (CR)	SCAP WT, fresh, top	Sc + Ap WT	L	10:05:00	6	11	46	20	0.361111	46	20	0.361111
12	Canton-S (CR)	SCAP WT, fresh, top	Sc + Ap WT	R	10:10:00	3	12	25	52	-0.3375	52	25	0.3375
13	Canton-S (CR)	SCAP PQQ-ADH	SC + Ap Wt	L	#REF!	8	13	26	35	-0.130435	26	35	-0.130435	-0.124044
14	Canton-S (CR)	SCAP PQQ-ADH	Sc + Ap WT	R	#REF!	5	14	25	35	-0.153846	35	25	0.153846
15	Canton-S (CR)	SCAP PQQ-ADH	Sc + Ap WT	L	#REF!	5	15	23	35	-0.190476	23	35	-0.190476
16	Canton-S (CR)	SCAP PQQ-ADH	Sc + Ap WT	R	#REF!	3	16	42	20	0.338462	20	42	-0.338462
17	Canton-S (CR)	SCAP PQQ-ADH	Sc + Ap WT	L	#REF!	5	17	38	31	0.0945946	38	31	0.0945946
18	Canton-S (CR)	SCAP PQQ-ADH	Sc + Ap WT	R	#REF!	8	18	48	22	0.333333	22	48	-0.333333
19	Canton-S (CR)	SCAP PQQ-ADH +0.75% acetald	SC + Ap Wt	L	#REF!	5	19	39	18	0.33871	39	18	0.33871	0.274801
20	Canton-S (CR)	SCAP PQQ-ADH + 0.75% acetald	Sc + Ap WT	R	#REF!	5	20	29	46	-0.2125	46	29	0.2125
21	Canton-S (CR)	SCAP PQQ-ADH + 0.75% acetald	Sc + Ap WT	L	#REF!	6	21	53	23	0.365854	53	23	0.365854
22	Canton-S (CR)	SCAP PQQ-ADH + 0.75% acetald	Sc + Ap WT	R	#REF!	4	22	29	28	0.0163934	28	29	-0.0163934
23	Canton-S (CR)	SCAP PQQ-ADH + 0.75% acetald	Sc + Ap WT	L	#REF!	2	23	44	15	0.47541	44	15	0.47541
24	Canton-S (CR)	SCAP PQQ-ADH + 0.75% acetald	Sc + Ap WT	R	#REF!	4	24	26	47	-0.272727	47	26	0.272727
25	Canton-S (CR)	SCAP PQQ-ADH + 3% acet acid	SC + Ap Wt	L	#REF!	7	25	37	38	-0.0121951	37	38	-0.0121951	-0.0272041
26	Canton-S (CR)	SCAP PQQ-ADH + 3% acet acid	Sc + Ap WT	R	#REF!	4	26	40	27	0.183099	27	40	-0.183099
27	Canton-S (CR)	SCAP PQQ-ADH + 3% acet acid	Sc + Ap WT	L	#REF!	3	27	35	35	0	35	35	0
28	Canton-S (CR)	SCAP PQQ-ADH + 3% acet acid	Sc + Ap WT	R	#REF!	4	28	41	38	0.0361446	38	41	-0.0361446
29	Canton-S (CR)	SCAP PQQ-ADH + 3% acet acid	Sc + Ap WT	L	#REF!	7	29	44	39	0.0555556	44	39	0.0555556
30	Canton-S (CR)	SCAP PQQ-ADH + 3% acet acid	Sc + Ap WT	R	#REF!	10	30	34	35	-0.0126582	35	34	0.0126582
31	Canton-S (CR)	SCAP PQQ-ADH + 0.75% acetald + 3% acet acid	SC + Ap Wt	L	#REF!	6	#REF!	48	13	0.522388	48	13	0.522388	0.366829
32	Canton-S (CR)	SCAP PQQ-ADH + 0.75% acetald + 3% acet acid	Sc + Ap WT	R	#REF!	7	#REF!	21	42	-0.3	42	21	0.3
33	Canton-S (CR)	SCAP PQQ-ADH + 0.75% acetald + 3% acet acid	Sc + Ap WT	L	#REF!	3	#REF!	42	19	0.359375	42	19	0.359375
34	Canton-S (CR)	SCAP PQQ-ADH + 0.75% acetald + 3% acet acid	Sc + Ap WT	R	#REF!	6	#REF!	20	38	-0.28125	38	20	0.28125
35	Canton-S (CR)	SCAP PQQ-ADH + 0.75% acetald + 3% acet acid	Sc + Ap WT	L	#REF!	3	#REF!	38	13	0.462963	38	13	0.462963
36	Canton-S (CR)	SCAP PQQ-ADH + 0.75% acetald + 3% acet acid	Sc + Ap WT	R	#REF!	6	#REF!	26	48	-0.275	48	26	0.275

## Sheet: 11_20_15
Experiment #	Fly Strain	Test Arm	Control Arm	Test Side	Time_Experiment	Center Flies	Experiment #	Left side	right side	Left Side RI	Test Arm	Control Arm	Test Arm RI
1	Canton-S (CR)	Mock	Mock	L	08:30:00	8	1	30	21	0.152542	30	21	0.152542	0.0341112
2	Canton-S (CR)	Mock	Mock	R	08:35:00	5	2	37	33	0.0533333	33	37	-0.0533333
3	Canton-S (CR)	Mock	Mock	L	08:40:00	5	3	47	25	0.285714	47	25	0.285714
4	Canton-S (CR)	Mock	Mock	R	08:45:00	8	4	45	32	0.152941	32	45	-0.152941
5	Canton-S (CR)	Mock	Mock	L	08:50:00	2	5	35	39	-0.0526316	35	39	-0.0526316
6	Canton-S (CR)	Mock	Mock	R	08:55:00	9	6	34	36	-0.0253165	36	34	0.0253165
7	Canton-S (CR)	SCAP WT	SC + Ap Wt	L	09:45:00	4	7	46	34	0.142857	46	34	0.142857	0.194463
8	Canton-S (CR)	SCAP WT	Sc + Ap WT	R	09:50:00	5	8	28	54	-0.298851	54	28	0.298851
9	Canton-S (CR)	SCAP WT	Sc + Ap WT	L	09:55:00	6	9	45	21	0.333333	45	21	0.333333
10	Canton-S (CR)	SCAP WT	Sc + Ap WT	R	10:00:00	3	10	27	45	-0.24	45	27	0.24
11	Canton-S (CR)	SCAP WT	Sc + Ap WT	L	10:05:00	2	11	48	31	0.209877	48	31	0.209877
12	Canton-S (CR)	SCAP WT	Sc + Ap WT	R	10:10:00	5	12	43	38	0.0581395	38	43	-0.0581395
13	Canton-S (CR)	SCAP PQQ-ADH	SC + Ap Wt	L	09:45:00	4	13	19	43	-0.363636	19	43	-0.363636	-0.115989
14	Canton-S (CR)	SCAP PQQ-ADH	Sc + Ap WT	R	09:50:00	3	14	33	36	-0.0416667	36	33	0.0416667
15	Canton-S (CR)	SCAP PQQ-ADH	Sc + Ap WT	L	09:55:00	3	15	41	36	0.0625	41	36	0.0625
16	Canton-S (CR)	SCAP PQQ-ADH	Sc + Ap WT	R	10:00:00	4	16	41	26	0.211268	26	41	-0.211268
17	Canton-S (CR)	SCAP PQQ-ADH	Sc + Ap WT	L	10:05:00	2	17	36	40	-0.0512821	36	40	-0.0512821
18	Canton-S (CR)	SCAP PQQ-ADH	Sc + Ap WT	R	10:10:00	3	18	39	27	0.173913	27	39	-0.173913
19	Canton-S (CR)	SCAP PQQ-ADH + 3% acet acid	SC + Ap Wt	L	10:35:00	8	19	33	42	-0.108434	33	42	-0.108434	-0.031601
20	Canton-S (CR)	SCAP PQQ-ADH + 3% acet acid	Sc + Ap WT	R	10:40:00	4	20	32	25	0.114754	25	32	-0.114754
21	Canton-S (CR)	SCAP PQQ-ADH + 3% acet acid	Sc + Ap WT	L	10:45:00	4	21	42	39	0.0352941	42	39	0.0352941
22	Canton-S (CR)	SCAP PQQ-ADH + 3% acet acid	Sc + Ap WT	R	10:50:00	9	22	36	33	0.0384615	33	36	-0.0384615
23	Canton-S (CR)	SCAP PQQ-ADH + 3% acet acid	Sc + Ap WT	L	10:55:00	6	23	34	29	0.0724638	34	29	0.0724638
24	Canton-S (CR)	SCAP PQQ-ADH + 3% acet acid	Sc + Ap WT	R	11:00:00	5	24	41	38	0.0357143	38	41	-0.0357143
25	Canton-S (CR)	SCAP PQQ-ADH + 0.75% acetaldehyde	SC + Ap Wt	L	11:25:00	3	25	57	15	0.56	57	15	0.56	0.341058
26	Canton-S (CR)	SCAP PQQ-ADH + 0.75% acetaldehyde	Sc + Ap WT	R	11:30:00	5	26	23	31	-0.135593	31	23	0.135593
27	Canton-S (CR)	SCAP PQQ-ADH + 0.75% acetaldehyde	Sc + Ap WT	L	11:35:00	3	27	53	27	0.313253	53	27	0.313253
28	Canton-S (CR)	SCAP PQQ-ADH + 0.75% acetaldehyde	Sc + Ap WT	R	11:40:00	1	28	24	48	-0.328767	48	24	0.328767
29	Canton-S (CR)	SCAP PQQ-ADH + 0.75% acetaldehyde	Sc + Ap WT	L	11:45:00	2	29	50	21	0.39726	50	21	0.39726
30	Canton-S (CR)	SCAP PQQ-ADH + 0.75% acetaldehyde	Sc + Ap WT	R	11:50:00	2	30	20	39	-0.311475	39	20	0.311475
31	Canton-S (CR)	SCAP PQQ-ADH + 3% acet acid +0.75% acetaldehyde	SC + Ap Wt	L	12:15:00	4	31	66	22	0.478261	66	22	0.478261	0.3453
32	Canton-S (CR)	SCAP PQQ-ADH + 3% acet acid + 0.75% acetaldehyde	Sc + Ap WT	R	12:20:00	4	32	25	40	-0.217391	40	25	0.217391
33	Canton-S (CR)	SCAP PQQ-ADH + 3% acet acid + 0.75% acetaldehyde	Sc + Ap WT	L	12:25:00	2	33	53	29	0.285714	53	29	0.285714
34	Canton-S (CR)	SCAP PQQ-ADH + 3% acet acid + 0.75% acetaldehyde	Sc + Ap WT	R	12:30:00	1	34	18	62	-0.54321	62	18	0.54321
35	Canton-S (CR)	SCAP PQQ-ADH + 3% acet acid + 0.75% acetaldehyde	Sc + Ap WT	L	12:35:00	6	35	48	31	0.2	48	31	0.2
36	Canton-S (CR)	SCAP PQQ-ADH + 3% acet acid + 0.75% acetaldehyde	Sc + Ap WT	R	12:40:00	3	36	22	47	-0.347222	47	22	0.347222
37	Canton-S (CR)	SCAP PQQ-ADH + 3% acet acid + 1.5% acetaldehyde	SC + Ap Wt	L	13:05:00	8	37	59	16	0.518072	59	16	0.518072	0.52253
38	Canton-S (CR)	SCAP PQQ-ADH + 3% acet acid + 1.5% acetaldehyde	Sc + Ap WT	R	13:10:00	3	38	13	47	-0.539683	47	13	0.539683
39	Canton-S (CR)	SCAP PQQ-ADH + 3% acet acid + 1.5% acetaldehyde	Sc + Ap WT	L	13:15:00	3	39	51	16	0.5	51	16	0.5
40	Canton-S (CR)	SCAP PQQ-ADH + 3% acet acid + 1.5% acetaldehyde	Sc + Ap WT	R	13:20:00	5	40	17	59	-0.518519	59	17	0.518519
41	Canton-S (CR)	SCAP PQQ-ADH + 3% acet acid + 1.5% acetaldehyde	Sc + Ap WT	L	13:25:00	0	41	51	18	0.478261	51	18	0.478261
42	Canton-S (CR)	SCAP PQQ-ADH + 3% acet acid + 1.5% acetaldehyde	Sc + Ap WT	R	13:30:00	2	42	12	48	-0.580645	48	12	0.580645

## Sheet: 11_22_15
Experiment #	Fly Strain	Test Arm	Control Arm	Test Side	Time_Experiment	Center Flies	Experiment #	Left side	right side	Left Side RI	Test Arm	Control Arm	Test Arm RI
1	Canton-S (CR)	Mock	Mock	L	08:30:00	10	1	29	35	-0.0810811	29	35	-0.0810811	-0.0471443
2	Canton-S (CR)	Mock	Mock	R	08:35:00	6	2	33	35	-0.027027	35	33	0.027027
3	Canton-S (CR)	Mock	Mock	L	08:40:00	7	3	39	25	0.197183	39	25	0.197183
4	Canton-S (CR)	Mock	Mock	R	08:45:00	6	4	40	35	0.0617284	35	40	-0.0617284
5	Canton-S (CR)	Mock	Mock	L	08:50:00	7	5	20	18	0.0444444	20	18	0.0444444
6	Canton-S (CR)	Mock	Mock	R	08:55:00	7	6	39	27	0.164384	27	39	-0.164384
7	Canton-S (CR)	SCAP WT	SC + Ap Wt	L	09:45:00	4	7	46	10	0.6	46	10	0.6	0.329464
8	Canton-S (CR)	SCAP WT	Sc + Ap WT	R	09:50:00	5	8	27	48	-0.2625	48	27	0.2625
9	Canton-S (CR)	SCAP WT	Sc + Ap WT	L	09:55:00	3	9	51	19	0.438356	51	19	0.438356
10	Canton-S (CR)	SCAP WT	Sc + Ap WT	R	10:00:00	3	10	43	62	-0.175926	62	43	0.175926
11	Canton-S (CR)	SCAP WT	Sc + Ap WT	L	10:05:00	7	11	51	18	0.434211	51	18	0.434211
12	Canton-S (CR)	SCAP WT	Sc + Ap WT	R	10:10:00	3	12	34	39	-0.0657895	39	34	0.0657895
13	Canton-S (CR)	SCAP PQQ-ADH	SC + Ap Wt	L	09:45:00	9	13	32	35	-0.0394737	32	35	-0.0394737	-0.00712611
14	Canton-S (CR)	SCAP PQQ-ADH	Sc + Ap WT	R	09:50:00	1	14	32	33	-0.0151515	33	32	0.0151515
15	Canton-S (CR)	SCAP PQQ-ADH	Sc + Ap WT	L	09:55:00	1	15	48	37	0.127907	48	37	0.127907
16	Canton-S (CR)	SCAP PQQ-ADH	Sc + Ap WT	R	10:00:00	6	16	44	32	0.146341	32	44	-0.146341
17	Canton-S (CR)	SCAP PQQ-ADH	Sc + Ap WT	L	10:05:00	3	17	38	38	0	38	38	0
18	Canton-S (CR)	SCAP PQQ-ADH	Sc + Ap WT	R	10:10:00	0	18	41	41	0	41	41	0
19	Canton-S (CR)	SCAP PQQ-ADH + 3% acet acid	SC + Ap Wt	L	10:35:00	3	19	45	41	0.0449438	45	41	0.0449438	-0.00673235
20	Canton-S (CR)	SCAP PQQ-ADH + 3% acet acid	Sc + Ap WT	R	10:40:00	8	20	47	39	0.0851064	39	47	-0.0851064
21	Canton-S (CR)	SCAP PQQ-ADH + 3% acet acid	Sc + Ap WT	L	10:45:00	7	21	47	34	0.147727	47	34	0.147727
22	Canton-S (CR)	SCAP PQQ-ADH + 3% acet acid	Sc + Ap WT	R	10:50:00	5	22	33	42	-0.1125	42	33	0.1125
23	Canton-S (CR)	SCAP PQQ-ADH + 3% acet acid	Sc + Ap WT	L	10:55:00	10	23	30	38	-0.102564	30	38	-0.102564
24	Canton-S (CR)	SCAP PQQ-ADH + 3% acet acid	Sc + Ap WT	R	11:00:00	4	24	42	30	0.157895	30	42	-0.157895
25	Canton-S (CR)	SCAP PQQ-ADH + 3% acet acid +0.75% acetaldehyde	SC + Ap Wt	L	11:25:00	3	25	62	19	0.511905	62	19	0.511905	0.279396
26	Canton-S (CR)	SCAP PQQ-ADH + 3% acet acid + 0.75% acetaldehyde	Sc + Ap WT	R	11:30:00	10	26	33	52	-0.2	52	33	0.2
27	Canton-S (CR)	SCAP PQQ-ADH + 3% acet acid + 0.75% acetaldehyde	Sc + Ap WT	L	11:35:00	6	27	40	20	0.30303	40	20	0.30303
28	Canton-S (CR)	SCAP PQQ-ADH + 3% acet acid + 0.75% acetaldehyde	Sc + Ap WT	R	11:40:00	4	28	25	26	-0.0181818	26	25	0.0181818
29	Canton-S (CR)	SCAP PQQ-ADH + 3% acet acid + 0.75% acetaldehyde	Sc + Ap WT	L	11:45:00	2	29	61	26	0.393258	61	26	0.393258
30	Canton-S (CR)	SCAP PQQ-ADH + 3% acet acid + 0.75% acetaldehyde	Sc + Ap WT	R	11:50:00	3	30	27	46	-0.25	46	27	0.25
31	Canton-S (CR)	SCAP PQQ-ADH, 0.75% acetaldehyde	SC + Ap Wt	L	12:15:00	1	31	47	31	0.202532	47	31	0.202532	0.239381
32	Canton-S (CR)	SCAP PQQ-ADH, 0.75% acetaldehyde	Sc + Ap WT	R	12:20:00	8	32	30	49	-0.218391	49	30	0.218391
33	Canton-S (CR)	SCAP PQQ-ADH, 0.75% acetaldehyde	Sc + Ap WT	L	12:25:00	6	33	57	14	0.558442	57	14	0.558442
34	Canton-S (CR)	SCAP PQQ-ADH, 0.75% acetaldehyde	Sc + Ap WT	R	12:30:00	7	34	36	40	-0.0481928	40	36	0.0481928
35	Canton-S (CR)	SCAP PQQ-ADH, 0.75% acetaldehyde	Sc + Ap WT	L	12:35:00	5	35	40	18	0.349206	40	18	0.349206
36	Canton-S (CR)	SCAP PQQ-ADH, 0.75% acetaldehyde	Sc + Ap WT	R	12:40:00	7	36	36	41	-0.0595238	41	36	0.0595238

## Sheet: 11_23_15
Experiment #	Fly Strain	Test Arm	Control Arm	Test Side	Time_Experiment	Center Flies	Experiment #	Left side	right side	Left Side RI	Test Arm	Control Arm	Test Arm RI
1	Canton-S (CR)	Mock	Mock	L	08:30:00	3	1	34	31	0.0441176	34	31	0.0441176	#DIV/0!
2	Canton-S (CR)	Mock	Mock	R	08:35:00	2	2	40	38	0.025	38	40	-0.025
3	Canton-S (CR)	Mock	Mock	L	08:40:00	5	3	30	30	0	30	30	0
4	Canton-S (CR)	Mock	Mock	R	08:45:00	4	4	30	30	0	30	30	0
5	Canton-S (CR)	Mock	Mock	L	08:50:00		5			#DIV/0!	0	0	#DIV/0!
6	Canton-S (CR)	Mock	Mock	R	08:55:00		6			#DIV/0!	0	0	#DIV/0!
7	Canton-S (CR)	SCAP WT	SC + Ap Wt	L	09:45:00	4	7	41	44	-0.0337079	41	44	-0.0337079	0.351968
8	Canton-S (CR)	SCAP WT	Sc + Ap WT	R	09:50:00	0	8	20	63	-0.518072	63	20	0.518072
9	Canton-S (CR)	SCAP WT	Sc + Ap WT	L	09:55:00	1	9	39	30	0.128571	39	30	0.128571
10	Canton-S (CR)	SCAP WT	Sc + Ap WT	R	10:00:00	3	10	14	52	-0.550725	52	14	0.550725
11	Canton-S (CR)	SCAP WT	Sc + Ap WT	L	10:05:00	1	11	62	24	0.436782	62	24	0.436782
12	Canton-S (CR)	SCAP WT	Sc + Ap WT	R	10:10:00	1	12	21	66	-0.511364	66	21	0.511364
13	Canton-S (CR)	SCAP PQQ-ADH	SC + Ap Wt	L	09:45:00	8	13	43	28	0.189873	43	28	0.189873	0.088929
14	Canton-S (CR)	SCAP PQQ-ADH	Sc + Ap WT	R	09:50:00	5	14	27	31	-0.0634921	31	27	0.0634921
15	Canton-S (CR)	SCAP PQQ-ADH	Sc + Ap WT	L	09:55:00	7	15	48	29	0.22619	48	29	0.22619
16	Canton-S (CR)	SCAP PQQ-ADH	Sc + Ap WT	R	10:00:00	4	16	38	37	0.0126582	37	38	-0.0126582
17	Canton-S (CR)	SCAP PQQ-ADH	Sc + Ap WT	L	10:05:00	6	17	35	38	-0.0379747	35	38	-0.0379747
18	Canton-S (CR)	SCAP PQQ-ADH	Sc + Ap WT	R	10:10:00	7	18	35	44	-0.104651	44	35	0.104651
19	Canton-S (CR)	SCAP PQQ-ADH + 3% acet acid +0.75% acetaldehyde	SC + Ap Wt	L	10:35:00	9	19	40	32	0.0987654	40	32	0.0987654	0.401774
20	Canton-S (CR)	SCAP PQQ-ADH + 3% acet acid + 0.75% acetaldehyde	Sc + Ap WT	R	10:40:00	10	20	18	63	-0.494505	63	18	0.494505
21	Canton-S (CR)	SCAP PQQ-ADH + 3% acet acid + 0.75% acetaldehyde	Sc + Ap WT	L	10:45:00	4	21	44	22	0.314286	44	22	0.314286
22	Canton-S (CR)	SCAP PQQ-ADH + 3% acet acid + 0.75% acetaldehyde	Sc + Ap WT	R	10:50:00	2	22	19	66	-0.54023	66	19	0.54023
23	Canton-S (CR)	SCAP PQQ-ADH + 3% acet acid + 0.75% acetaldehyde	Sc + Ap WT	L	10:55:00	7	23	48	21	0.355263	48	21	0.355263
24	Canton-S (CR)	SCAP PQQ-ADH + 3% acet acid + 0.75% acetaldehyde	Sc + Ap WT	R	11:00:00	7	24	12	60	-0.607595	60	12	0.607595
25	Canton-S (CR)	SCAP PQQ-ADH + 3% acet acid +1.5% acetaldehyde	SC + Ap Wt	L	11:25:00	8	25	33	30	0.0422535	33	30	0.0422535	0.490379
26	Canton-S (CR)	SCAP PQQ-ADH + 3% acet acid + 1.5% acetaldehyde	Sc + Ap WT	R	11:30:00	4	26	18	68	-0.555556	68	18	0.555556
27	Canton-S (CR)	SCAP PQQ-ADH + 3% acet acid + 1.5% acetaldehyde	Sc + Ap WT	L	11:35:00	3	27	71	17	0.593407	71	17	0.593407
28	Canton-S (CR)	SCAP PQQ-ADH + 3% acet acid + 1.5% acetaldehyde	Sc + Ap WT	R	11:40:00		28			#DIV/0!	0	0
29	Canton-S (CR)	SCAP PQQ-ADH + 3% acet acid + 1.5% acetaldehyde	Sc + Ap WT	L	11:45:00	4	29	62	10	0.684211	62	10	0.684211
30	Canton-S (CR)	SCAP PQQ-ADH + 3% acet acid + 1.5% acetaldehyde	Sc + Ap WT	R	11:50:00	4	30	16	65	-0.576471	65	16	0.576471
31	Canton-S (CR)	SCAP PQQ-ADH + 3% acet acid +0.2% acetaldehyde	SC + Ap Wt	L	12:15:00	11	31	32	23	0.136364	32	23	0.136364	0.244514
32	Canton-S (CR)	SCAP PQQ-ADH + 3% acet acid + 0.2% acetaldehyde	Sc + Ap WT	R	12:20:00	4	32	30	51	-0.247059	51	30	0.247059
33	Canton-S (CR)	SCAP PQQ-ADH + 3% acet acid + 0.2% acetaldehyde	Sc + Ap WT	L	12:25:00	8	33	24	31	-0.111111	24	31	-0.111111
34	Canton-S (CR)	SCAP PQQ-ADH + 3% acet acid + 0.2% acetaldehyde	Sc + Ap WT	R	12:30:00	1	34	19	53	-0.465753	53	19	0.465753
35	Canton-S (CR)	SCAP PQQ-ADH + 3% acet acid + 0.2% acetaldehyde	Sc + Ap WT	L	12:35:00	6	35	41	20	0.313433	41	20	0.313433
36	Canton-S (CR)	SCAP PQQ-ADH + 3% acet acid + 0.2% acetaldehyde	Sc + Ap WT	R	12:40:00	5	36	20	52	-0.415584	52	20	0.415584
37	Canton-S (CR)	SCAP PQQ-ADH + 3% acet acid +3% acetaldehyde	SC + Ap Wt	L	13:05:00	7	37	46	13	0.5	46	13	0.5	0.367347
38	Canton-S (CR)	SCAP PQQ-ADH + 3% acet acid + 3% acetaldehyde	Sc + Ap WT	R	13:10:00	6	38	25	48	-0.291139	48	25	0.291139
39	Canton-S (CR)	SCAP PQQ-ADH + 3% acet acid + 3% acetaldehyde	Sc + Ap WT	L	13:15:00	8	39	40	30	0.128205	40	30	0.128205
40	Canton-S (CR)	SCAP PQQ-ADH + 3% acet acid + 3% acetaldehyde	Sc + Ap WT	R	13:20:00	5	40	23	60	-0.420455	60	23	0.420455
41	Canton-S (CR)	SCAP PQQ-ADH + 3% acet acid + 3% acetaldehyde	Sc + Ap WT	L	13:25:00	7	41	43	20	0.328571	43	20	0.328571
42	Canton-S (CR)	SCAP PQQ-ADH + 3% acet acid + 3% acetaldehyde	Sc + Ap WT	R	13:30:00	5	42	17	62	-0.535714	62	17	0.535714
43	Canton-S (CR)	SCAP PQQ-ADH + 3% acet acid +0.2% acetaldehyde	SC + Ap Wt	L	13:55:00	4	43	50	22	0.368421	50	22	0.368421	0.255763
44	Canton-S (CR)	SCAP PQQ-ADH + 3% acet acid + 0.2% acetaldehyde	Sc + Ap WT	R	14:00:00	3	44	34	41	-0.0897436	41	34	0.0897436
45	Canton-S (CR)	SCAP PQQ-ADH + 3% acet acid + 0.2% acetaldehyde	Sc + Ap WT	L	14:05:00	3	45	47	15	0.492308	44	18	0.4
46	Canton-S (CR)	SCAP PQQ-ADH + 3% acet acid + 0.2% acetaldehyde	Sc + Ap WT	R	14:10:00	6	46	32	52	-0.222222	52	32	0.222222
47	Canton-S (CR)	SCAP PQQ-ADH + 3% acet acid + 0.2% acetaldehyde	Sc + Ap WT	L	14:15:00	4	47	42	30	0.157895	42	30	0.157895
48	Canton-S (CR)	SCAP PQQ-ADH + 3% acet acid + 0.2% acetaldehyde	Sc + Ap WT	R	14:20:00	5	48	26	50	-0.296296	50	26	0.296296
49	Canton-S (CR)	SCAP PQQ-ADH + 3% acet acid +3% acetaldehyde	SC + Ap Wt	L	14:45:00	2	49	52	16	0.514286	52	16	0.514286	0.395283
50	Canton-S (CR)	SCAP PQQ-ADH + 3% acet acid + 3% acetaldehyde	Sc + Ap WT	R	14:50:00	10	50	31	36	-0.0649351	36	31	0.0649351
51	Canton-S (CR)	SCAP PQQ-ADH + 3% acet acid + 3% acetaldehyde	Sc + Ap WT	L	14:55:00	4	51	69	20	0.526882	69	20	0.526882
52	Canton-S (CR)	SCAP PQQ-ADH + 3% acet acid + 3% acetaldehyde	Sc + Ap WT	R	15:00:00	8	52	17	46	-0.408451	46	17	0.408451
53	Canton-S (CR)	SCAP PQQ-ADH + 3% acet acid + 3% acetaldehyde	Sc + Ap WT	L	15:05:00	8	53	44	11	0.52381	44	11	0.52381
54	Canton-S (CR)	SCAP PQQ-ADH + 3% acet acid + 3% acetaldehyde	Sc + Ap WT	R	15:10:00	6	54	24	51	-0.333333	51	24	0.333333

## Sheet: 11_1_acetald_der_separate_Exp
Experiment #	Fly Strain	Test Arm	Control Arm	Test Side	Time_Experiment	Center Flies	Experiment #	Left Arm	Right Arm	Left Side RI	Test Arm	Control Arm	Test Arm RI
1	Canton-S (CR)	Mock	Mock	L	11:00:00	16	1	26	18	0.133333	26	18	0.133333	-0.000111228
2	Canton-S (CR)	Mock	Mock	R	11:05:00	4	2	18	26	-0.166667	26	18	0.166667	0.0562193
3	Canton-S (CR)	Mock	Mock	L	11:10:00	13	3	34	26	0.109589	34	26	0.109589
4	Canton-S (CR)	Mock	Mock	R	11:15:00	6	4	21	25	-0.0769231	25	21	0.0769231
5	Canton-S (CR)	Mock	Mock	L	11:20:00	11	5	19	24	-0.0925926	19	24	-0.0925926
6	Canton-S (CR)	Mock	Mock	R	11:25:00	12	6	22	19	0.0566038	19	22	-0.0566038
7	Canton-S (CR)	SCAP WT	SC + Ap	L	11:30:00	8	7	38	21	0.253731	38	21	0.253731	0.345961
8	Canton-S (CR)	SCAP WT	SC + Ap	R	11:35:00	7	8	15	41	-0.412698	41	15	0.412698
9	Canton-S (CR)	SCAP WT	SC + Ap	L	11:40:00	3	9	29	16	0.270833	29	16	0.270833
10	Canton-S (CR)	SCAP WT	SC + Ap	R	11:45:00	10	10	17	35	-0.290323	35	17	0.290323
11	Canton-S (CR)	SCAP WT	SC + Ap	L	11:50:00	3	11	43	16	0.435484	43	16	0.435484
12	Canton-S (CR)	SCAP WT	SC + Ap	R	11:55:00	5	12	16	42	-0.412698	42	16	0.412698
13	Canton-S (CR)	SCAP PQQ	SC + Ap	L	12:25:00	10	13	17	23	-0.12	17	23	-0.12	-0.0443304
14	Canton-S (CR)	SCAP PQQ	SC + Ap	R	12:30:00	7	14	25	23	0.0363636	23	25	-0.0363636
15	Canton-S (CR)	SCAP PQQ	SC + Ap	b	12:35:00	6	15	17	21	-0.0909091	17	21	-0.0909091
16	Canton-S (CR)	SCAP PQQ	SC + Ap	R	12:40:00	5	16	26	25	0.0178571	25	26	-0.0178571
17	Canton-S (CR)	SCAP PQQ	SC + Ap	L	12:45:00	8	17	28	32	-0.0588235	28	32	-0.0588235
18	Canton-S (CR)	SCAP PQQ	SC + Ap	R	12:50:00	15	18	25	29	-0.057971	29	25	0.057971
19	Canton-S (CR)	SCAP PQQ + acetal, 2,3butanedione, acetion	SC + Ap	L	13:20:00	10	#REF!	45	19	0.351351	45	19	0.351351	0.369017
20	Canton-S (CR)	SCAP PQQ + acetal, 2,3butanedione, acetoin	SC + Ap	R	13:25:00	7	#REF!	9	35	-0.509804	35	9	0.509804
21	Canton-S (CR)	SCAP PQQ + acetal, 2,3butanedione, acetoin	SC + Ap	b	13:30:00	4	#REF!	40	22	0.272727	40	22	0.272727
22	Canton-S (CR)	SCAP PQQ + acetal, 2,3butanedione, acetoin	SC + Ap	R	13:35:00	2	#REF!	9	35	-0.565217	35	9	0.565217
23	Canton-S (CR)	SCAP PQQ + acetal, 2,3butanedione, acetoin	SC + Ap	L	13:40:00	7	#REF!	31	15	0.301887	31	15	0.301887
24	Canton-S (CR)	SCAP PQQ + acetal, 2,3butanedione, acetoin	SC + Ap	R	13:45:00	6	#REF!	21	34	-0.213115	34	21	0.213115

## Sheet: 11_2_acetald_der_separateExp
Experiment #	Fly Strain	Test Arm	Control Arm	Test Side	Time_Experiment	Center Flies	Experiment #	Left Arm	Right Arm	Left Side RI	Test Arm	Control Arm	Test Arm RI
1	Canton-S (CR)	Mock	Mock	L	11:00:00	11	1	38	28	0.12987	38	28	0.12987	0.0346036
2	Canton-S (CR)	Mock	Mock	R	11:05:00	12	2	30	28	0.0285714	28	30	-0.0285714	-0.000958443
3	Canton-S (CR)	Mock	Mock	L	11:10:00	10	3	27	24	0.0491803	27	24	0.0491803
4	Canton-S (CR)	Mock	Mock	R	11:15:00	14	4	26	26	0	26	26	0
5	Canton-S (CR)	Mock	Mock	L	11:20:00	6	5	29	30	-0.0153846	29	30	-0.0153846
6	Canton-S (CR)	Mock	Mock	R	11:25:00	5	6	38	28	0.140845	28	38	-0.140845
7	Canton-S (CR)	SCAP WT	SC + Ap	L	11:30:00	4	7	40	19	0.333333	40	19	0.333333	0.358938
8	Canton-S (CR)	SCAP WT	SC + Ap	R	11:35:00	4	8	18	46	-0.411765	46	18	0.411765
9	Canton-S (CR)	SCAP WT	SC + Ap	L	11:40:00	2	9	56	22	0.425	56	22	0.425
10	Canton-S (CR)	SCAP WT	SC + Ap	R	11:45:00	6	10	22	44	-0.305556	44	22	0.305556
11	Canton-S (CR)	SCAP WT	SC + Ap	L	11:50:00	6	11	44	16	0.424242	44	16	0.424242
12	Canton-S (CR)	SCAP WT	SC + Ap	R	11:55:00	6	12	22	39	-0.253731	39	22	0.253731
13	Canton-S (CR)	SCAP PQQ	SC + Ap	L	12:25:00	4	13	34	33	0.0140845	34	33	0.0140845	-0.0930127
14	Canton-S (CR)	SCAP PQQ	SC + Ap	R	12:30:00	6	14	37	19	0.290323	19	37	-0.290323
15	Canton-S (CR)	SCAP PQQ	SC + Ap	b	12:35:00	7	15	21	44	-0.319444	21	44	-0.319444
16	Canton-S (CR)	SCAP PQQ	SC + Ap	R	12:40:00	2	16	33	28	0.0793651	28	33	-0.0793651
17	Canton-S (CR)	SCAP PQQ	SC + Ap	L	12:45:00	5	17	28	21	0.12963	28	21	0.12963
18	Canton-S (CR)	SCAP PQQ	SC + Ap	R	12:50:00	2	18	39	38	0.0126582	38	39	-0.0126582
19	Canton-S (CR)	SCAP PQQ + acetal, 2,3butanedione, acetion	SC + Ap	L	13:20:00	4	#REF!	60	17	0.530864	60	17	0.530864	0.381377
20	Canton-S (CR)	SCAP PQQ + acetal, 2,3butanedione, acetoin	SC + Ap	R	13:25:00	4	#REF!	13	31	-0.375	31	13	0.375
21	Canton-S (CR)	SCAP PQQ + acetal, 2,3butanedione, acetoin	SC + Ap	b	13:30:00	4	#REF!	43	20	0.343284	43	20	0.343284
22	Canton-S (CR)	SCAP PQQ + acetal, 2,3butanedione, acetoin	SC + Ap	R	13:35:00	11	#REF!	17	37	-0.307692	37	17	0.307692
23	Canton-S (CR)	SCAP PQQ + acetal, 2,3butanedione, acetoin	SC + Ap	L	13:40:00	4	#REF!	40	15	0.423729	40	15	0.423729
24	Canton-S (CR)	SCAP PQQ + acetal, 2,3butanedione, acetoin	SC + Ap	R	13:45:00	6	#REF!	24	48	-0.307692	48	24	0.307692
