# Supplementary material for: Metabolite exchange between microbiome members produces compounds that influence Drosophila behavior
Source: eLife. 2017 Jan 9;6:e18855. doi: 10.7554/eLife.18855 (PMC5222558; doi:10.7554/eLife.18855)
Supplement: Figure 6—figure supplement 2—source data 1. — DOI: http://dx.doi.org/10.7554/eLife.18855.047 [file elife-18855-fig6-figsupp2-data1.xlsx]

## Sheet: Monday_2_29
Experiment #	Fly Strain	Test Arm	Control Arm	Test Side	Time_Experiment	Center Flies	Experiment #	Left side	right side	Left Side RI	Test Arm	Control Arm	Test Arm RI
1	Canton-S (CR)	Mock	Mock	L	09:00:00	7	1	58	50	0.0695652	58	50	0.0695652	0.0151362
2	Canton-S (CR)	Mock	Mock	R	09:05:00	7	2	54	41	0.127451	41	54	-0.127451
3	Canton-S (CR)	Mock	Mock	L	09:10:00	13	3	38	48	-0.10101	38	48	-0.10101
4	Canton-S (CR)	Mock	Mock	R	09:15:00	11	4	41	44	-0.03125	44	41	0.03125
5	Canton-S (CR)	Mock	Mock	L	09:20:00	7	5	69	50	0.150794	69	50	0.150794
6	Canton-S (CR)	Mock	Mock	R	09:25:00	6	6	59	68	-0.0676692	68	59	0.0676692
7	Canton-S (CR)	H20_4	ACV (25%) (italian)	L	09:55:00	3	7	78	19	0.59	78	19	0.59	0.569844
8	Canton-S (CR)	H20_4	ACV (25%) (italian)	R	10:00:00	0	8	26	93	-0.563025	93	26	0.563025
9	Canton-S (CR)	H20_4	ACV (25%) (italian)	L	10:05:00	0	9	96	28	0.548387	96	28	0.548387
10	Canton-S (CR)	H20_4	ACV (25%) (italian)	R	10:10:00	3	10	23	71	-0.494845	71	23	0.494845
11	Canton-S (CR)	H20_4	ACV (25%) (italian)	L	10:15:00	3	11	84	28	0.486957	84	28	0.486957
12	Canton-S (CR)	H20_4	ACV (25%) (italian)	R	10:20:00	0	12	14	92	-0.735849	92	14	0.735849
13	Canton-S (CR)	H20_4	ACV (25%) (heinz)	L	10:50:00	4	13	64	35	0.281553	64	35	0.281553	0.345731
14	Canton-S (CR)	H20_4	ACV (25%) (heinz)	R	10:55:00	0	14	42	65	-0.214953	65	42	0.214953
15	Canton-S (CR)	H20_4	ACV (25%) (heinz)	L	11:00:00	4	15	79	23	0.528302	79	23	0.528302
16	Canton-S (CR)	H20_4	ACV (25%) (heinz)	R	11:05:00	3	16	28	72	-0.427184	72	28	0.427184
17	Canton-S (CR)	H20_4	ACV (25%) (heinz)	L	11:10:00	3	17	75	32	0.390909	75	32	0.390909
18	Canton-S (CR)	H20_4	ACV (25%) (heinz)	R	11:15:00	5	18	39	64	-0.231481	64	39	0.231481
19	Canton-S (CR)	H20_4	ACV (25%) (bragg)	L	11:45:00	3	19	58	42	0.15534	58	42	0.15534	0.310617
20	Canton-S (CR)	H20_4	ACV (25%) (bragg)	R	11:50:00	3	20	34	68	-0.32381	68	34	0.32381
21	Canton-S (CR)	H20_4	ACV (25%) (bragg)	L	11:55:00	6	21	79	24	0.504587	79	24	0.504587
22	Canton-S (CR)	H20_4	ACV (25%) (bragg)	R	12:00:00	5	22	34	48	-0.16092	48	34	0.16092
23	Canton-S (CR)	H20_4	ACV (25%) (bragg)	L	12:05:00	5	23	72	28	0.419048	72	28	0.419048
24	Canton-S (CR)	H20_4	ACV (25%) (bragg)	R	12:10:00	5	24	36	69	-0.3	69	36	0.3
25	Canton-S (CR)	H20_4	SCAM 72 h	L	12:40:00	3	25	79	38	0.341667	79	38	0.341667	0.0793616
26	Canton-S (CR)	H20_4	SCAM 72 h	R	12:45:00	4	26	47	52	-0.0485437	52	47	0.0485437
27	Canton-S (CR)	H20_4	SCAM 72 h	L	12:50:00	7	27	60	63	-0.0230769	60	63	-0.0230769
28	Canton-S (CR)	H20_4	SCAM 72 h	R	12:55:00	6	28	48	43	0.0515464	43	48	-0.0515464
29	Canton-S (CR)	H20_4	SCAM 72 h	L	13:00:00	6	29	56	38	0.18	56	38	0.18
30	Canton-S (CR)	H20_4	SCAM 72 h	R	13:05:00	9	30	48	46	0.0194175	46	48	-0.0194175
31	Canton-S (CR)	H20_4	SCAMLP 72 h	L	13:35:00	0	31	47	61	-0.12963	47	61	-0.12963	0.0800966
32	Canton-S (CR)	H20_4	SCAMLP 72 h	R	13:40:00	4	32	61	50	0.0956522	50	61	-0.0956522
33	Canton-S (CR)	H20_4	SCAMLP 72 h	L	13:45:00	2	33	55	44	0.108911	55	44	0.108911
34	Canton-S (CR)	H20_4	SCAMLP 72 h	R	13:50:00	5	34	34	72	-0.342342	72	34	0.342342
35	Canton-S (CR)	H20_4	SCAMLP 72 h	L	13:55:00	4	35	55	40	0.151515	55	40	0.151515
36	Canton-S (CR)	H20_4	SCAMLP 72 h	R	14:00:00	3	36	42	52	-0.103093	52	42	0.103093
37	Canton-S (CR)	SCAMLP 72 h	ACV (25%) (bragg)	L	14:30:00	4	37	73	43	0.25	73	43	0.25	0.321447
38	Canton-S (CR)	SCAMLP 72 h	ACV (25%) (bragg)	R	14:35:00	7	38	38	64	-0.238532	64	38	0.238532
39	Canton-S (CR)	SCAMLP 72 h	ACV (25%) (bragg)	L	14:40:00	3	39	73	27	0.446602	73	27	0.446602
40	Canton-S (CR)	SCAMLP 72 h	ACV (25%) (bragg)	R	14:45:00	4	40	39	62	-0.219048	62	39	0.219048
41	Canton-S (CR)	SCAMLP 72 h	ACV (25%) (bragg)	L	14:50:00	6	41	66	29	0.366337	66	29	0.366337
42	Canton-S (CR)	SCAMLP 72 h	ACV (25%) (bragg)	R	14:55:00	2	42	28	68	-0.408163	68	28	0.408163
43	Canton-S (CR)	H20_4	water	L	15:25:00	4	43	107	5	0.87931	107	5	0.87931	0.813203
44	Canton-S (CR)	H20_4	water	R	15:30:00	5	44	16	89	-0.663636	89	16	0.663636
45	Canton-S (CR)	H20_4	water	L	15:35:00	2	45	99	0	0.980198	99	0	0.980198
46	Canton-S (CR)	H20_4	water	R	15:40:00	8	46	7	99	-0.807018	99	7	0.807018
47	Canton-S (CR)	H20_4	water	L	15:45:00	5	47	89	11	0.742857	89	11	0.742857
48	Canton-S (CR)	H20_4	water	R	15:50:00	9	48	8	112	-0.806202	112	8	0.806202

## Sheet: Thur_3_3
Experiment #	Fly Strain	Test Arm	Control Arm	Test Side	Time_Experiment	Center Flies	Experiment #	Left side	right side	Left Side RI	Test Arm	Control Arm	Test Arm RI
1	Canton-S (CR)	Mock	Mock	L	09:00:00	3	1	51	49	0.0194175	51	49	0.0194175	-0.0524607
2	Canton-S (CR)	Mock	Mock	R	09:05:00	6	2	41	41	0	41	41	0
3	Canton-S (CR)	Mock	Mock	L	09:10:00	5	3	46	56	-0.0934579	46	56	-0.0934579
4	Canton-S (CR)	Mock	Mock	R	09:15:00	1	4	62	44	0.168224	44	62	-0.168224
5	Canton-S (CR)	Mock	Mock	L	09:20:00	7	5	48	44	0.040404	48	44	0.040404
6	Canton-S (CR)	Mock	Mock	R	09:25:00	8	6	65	51	0.112903	51	65	-0.112903
7	Canton-S (CR)	H20_4	ACV (25%) (italian)	L	09:55:00	7	7	102	18	0.661417	102	18	0.661417	0.536813
8	Canton-S (CR)	H20_4	ACV (25%) (italian)	R	10:00:00	5	8	29	78	-0.4375	78	29	0.4375
9	Canton-S (CR)	H20_4	ACV (25%) (italian)	L	10:05:00	6	9	80	22	0.537037	80	22	0.537037
10	Canton-S (CR)	H20_4	ACV (25%) (italian)	R	10:10:00	12	10	18	63	-0.483871	63	18	0.483871
11	Canton-S (CR)	H20_4	ACV (25%) (italian)	L	10:15:00	12	11	92	20	0.580645	92	20	0.580645
12	Canton-S (CR)	H20_4	ACV (25%) (italian)	R	10:20:00	11	12	18	69	-0.520408	69	18	0.520408
13	Canton-S (CR)	H20_4	ACV (25%) (heinz)	L	10:50:00	8	13	86	43	0.313869	86	43	0.313869	0.324431
14	Canton-S (CR)	H20_4	ACV (25%) (heinz)	R	10:55:00	4	14	40	86	-0.353846	86	40	0.353846
15	Canton-S (CR)	H20_4	ACV (25%) (heinz)	L	11:00:00	9	15	69	42	0.225	69	42	0.225
16	Canton-S (CR)	H20_4	ACV (25%) (heinz)	R	11:05:00	8	16	29	76	-0.415929	76	29	0.415929
17	Canton-S (CR)	H20_4	ACV (25%) (heinz)	L	11:10:00	11	17	59	43	0.141593	59	43	0.141593
18	Canton-S (CR)	H20_4	ACV (25%) (heinz)	R	11:15:00	9	18	30	98	-0.49635	98	30	0.49635
19	Canton-S (CR)	H20_4	ACV (25%) (bragg)	L	11:45:00	7	19	69	40	0.25	69	40	0.25	0.337124
20	Canton-S (CR)	H20_4	ACV (25%) (bragg)	R	11:50:00	8	20	48	69	-0.168	69	48	0.168
21	Canton-S (CR)	H20_4	ACV (25%) (bragg)	L	11:55:00	2	21	81	31	0.438596	81	31	0.438596
22	Canton-S (CR)	H20_4	ACV (25%) (bragg)	R	12:00:00	9	22	44	78	-0.259542	78	44	0.259542
23	Canton-S (CR)	H20_4	ACV (25%) (bragg)	L	12:05:00	6	23	80	31	0.418803	80	31	0.418803
24	Canton-S (CR)	H20_4	ACV (25%) (bragg)	R	12:10:00	6	24	18	58	-0.487805	58	18	0.487805
25	Canton-S (CR)	H20_4	SCAM 72 h	L	12:40:00	8	25	54	41	0.126214	54	41	0.126214	0.314769
26	Canton-S (CR)	H20_4	SCAM 72 h	R	12:45:00	3	26	42	51	-0.09375	51	42	0.09375
27	Canton-S (CR)	H20_4	SCAM 72 h	L	12:50:00	4	27	61	37	0.235294	61	37	0.235294
28	Canton-S (CR)	H20_4	SCAM 72 h	R	12:55:00	6	28	17	91	-0.649123	91	17	0.649123
29	Canton-S (CR)	H20_4	SCAM 72 h	L	13:00:00	8	29	68	25	0.425743	68	25	0.425743
30	Canton-S (CR)	H20_4	SCAM 72 h	R	13:05:00	6	30	31	69	-0.358491	69	31	0.358491
31	Canton-S (CR)	H20_4	SCAMLP 72 h	L	13:35:00	7	31	65	44	0.181034	65	44	0.181034	0.24938
32	Canton-S (CR)	H20_4	SCAMLP 72 h	R	13:40:00	3	32	33	78	-0.394737	78	33	0.394737
33	Canton-S (CR)	H20_4	SCAMLP 72 h	L	13:45:00	4	33	56	40	0.16	56	40	0.16
34	Canton-S (CR)	H20_4	SCAMLP 72 h	R	13:50:00	4	34	38	72	-0.298246	72	38	0.298246
35	Canton-S (CR)	H20_4	SCAMLP 72 h	L	13:55:00	6	35	62	39	0.214953	62	39	0.214953
36	Canton-S (CR)	H20_4	SCAMLP 72 h	R	14:00:00	4	36	33	56	-0.247312	56	33	0.247312
37	Canton-S (CR)	SCAMLP 72 h	ACV (25%) (bragg)	L	14:30:00	2	37	54	40	0.145833	54	40	0.145833	0.0768247
38	Canton-S (CR)	SCAMLP 72 h	ACV (25%) (bragg)	R	14:35:00	1	38	56	62	-0.0504202	62	56	0.0504202
39	Canton-S (CR)	SCAMLP 72 h	ACV (25%) (bragg)	L	14:40:00	6	39	58	40	0.173077	58	40	0.173077
40	Canton-S (CR)	SCAMLP 72 h	ACV (25%) (bragg)	R	14:45:00	6	40	47	55	-0.0740741	55	47	0.0740741
41	Canton-S (CR)	SCAMLP 72 h	ACV (25%) (bragg)	L	14:50:00	2	41	50	62	-0.105263	50	62	-0.105263
42	Canton-S (CR)	SCAMLP 72 h	ACV (25%) (bragg)	R	14:55:00	8	42	46	60	-0.122807	60	46	0.122807
43	Canton-S (CR)	H20_4	water	L	15:25:00	1	43	94	4	0.909091	94	4	0.909091	0.804034
44	Canton-S (CR)	H20_4	water	R	15:30:00	4	44	7	89	-0.82	89	7	0.82
45	Canton-S (CR)	H20_4	water	L	15:35:00	2	45	94	7	0.84466	94	7	0.84466
46	Canton-S (CR)	H20_4	water	R	15:40:00	3	46	13	83	-0.707071	83	13	0.707071
47	Canton-S (CR)	H20_4	water	L	15:45:00	3	47	118	9	0.838462	118	9	0.838462
48	Canton-S (CR)	H20_4	water	R	15:50:00	4	48	16	102	-0.704918	102	16	0.704918
