# Supplementary material for: Metabolite exchange between microbiome members produces compounds that influence Drosophila behavior
Source: eLife. 2017 Jan 9;6:e18855. doi: 10.7554/eLife.18855 (PMC5222558; doi:10.7554/eLife.18855)
Supplement: Figure 6—source data 1. — DOI: http://dx.doi.org/10.7554/eLife.18855.043 [file elife-18855-fig6-data1.xlsx]

## Sheet: mm_#1_21_concentrations
Volatile	Metabolite mixture
	1	2	3	4	5	6	7	8	9	10	11	12	13	14	15	16	17	18	19	20	21
ethanol	0.0057	0.0057	0.0057	0.0057	0.0057	0.0057	0.0057	0.0057	0.0057	0.0057	0.00285	0.00285	0.00285	0.00285	0.00285	0.00285	0.0057	0.0057	0.0057	0.0057	0.0057
isobutanol	7e-06	7e-06	7e-06	7e-06	7e-06	7e-06	7e-06	7e-06	7e-06	7e-06	3.5e-06	3.5e-06	3.5e-06	3.5e-06	None	3.5e-06	5e-06	7e-06	7e-06	7e-06	7e-06
acetic acid	0.0144	0.0144	0.0144	0.0144	0.0144	0.0144	0.0144	0.0144	0.0144	0.0144	0.0144	0.0144	0.0144	0.0144	0.0144	0.0144	0.0144	0.0144	0.0144	0.0144	0.0144
isoamyl alcohol	1e-05	1e-05	1e-05	1e-05	1e-05	1e-05	1e-05	1e-05	1e-05	5e-06	5e-06	5e-06	5e-06	5e-06	2e-06	5e-06	5e-06	1e-05	1e-05	1e-05	1e-05
isoamyl acetate	6.5e-06	6.5e-06	6.5e-06	6.5e-06	6.5e-06	6.5e-06	6.5e-06	6.5e-06	1e-05	6.5e-06	5e-06	6.5e-06	6.5e-06	6.5e-06	6.5e-06	6.5e-06	6.5e-06	6.5e-06	6.5e-06	6.5e-06	6.5e-06
1,1-diethoxyethane	0.0001	0.0003	0.0001	None	3.3e-05	0.0001	0.0001	1e-05	0.0002	0.0001	5e-05	0.0001	0.0003	0.0005	0.0005	3e-05	3e-05	3e-05	9.99999e-05	9.99999e-05	9.99999e-05
acetaldehyde	0.0001	0.0001	0.0001	0.0001	0.0001	0.0001	0.0001	1e-05	0.0001	0.0001	5e-05	5e-05	5e-05	5e-05	2.5e-05	2.5e-05	None	None	None	None	None
ethyl acetate	1e-05	1e-05	1e-05	1e-05	1e-05	1e-05	1e-05	1e-05	2e-05	1e-05	5e-06	1e-05	1e-05	1e-05	1e-05	1e-05	1e-05	6.5e-06	6.5e-06	6.5e-06	6.5e-06
1-pentanol	1e-05	1e-05	1e-05	1e-05	1e-05	1e-05	1e-05	1e-05	1e-05	5e-06	2.5e-06	5e-06	5e-06	5e-06	2e-06	None	None	None	None	None	None
benzeneethanol	1e-05	1e-05	1e-05	1e-05	1e-05	1e-05	1e-05	1e-05	1e-05	5e-06	2.5e-06	5e-06	5e-06	5e-06	2e-06	5e-06	5e-06	5e-06	5e-06	5e-06	5e-06
isobutyl acetate	1e-05	1e-05	1e-05	1e-05	1e-05	1e-05	1e-05	1e-05	1e-05	1e-05	5e-06	1e-05	1e-05	1e-05	1e-05	1e-05	1e-05	6.5e-06	6.5e-06	6.5e-06	6.5e-06
2-phenethyl acetate	1e-05	1e-05	1e-05	1e-05	1e-05	1e-05	None	1e-05	None	None	5e-06	1e-05	1e-05	1e-05	1e-05	1e-05	1e-05	6.5e-06	6.5e-06	6.5e-06	6.5e-06
butyl acetate	1e-05	1e-05	1e-05	1e-05	1e-05	1e-05	None	1e-05	None	None	5e-06	1e-05	1e-05	1e-05	1e-05	1e-05	1e-05	6.5e-06	6.5e-06	6.5e-06	6.5e-06
2-methylbutyl acetate	1e-05	1e-05	1e-05	1e-05	1e-05	1e-05	1e-05	1e-05	2e-05	1e-05	5e-06	1e-05	1e-05	1e-05	1e-05	1e-05	1e-05	6.5e-06	6.5e-06	6.5e-06	6.5e-06
methyl acetate	1e-05	1e-05	1e-05	1e-05	1e-05	1e-05	1e-05	1e-05	1e-05	1e-05	5e-06	1e-05	1e-05	1e-05	1e-05	1e-05	1e-05	6.5e-06	6.5e-06	6.5e-06	6.5e-06
2-acetoxy-3-butanone	None	None	1e-05	1e-05	1e-05	1e-05	None	1e-05	None	None	5e-06	1e-05	1e-05	1e-05	1e-05	None	None	None	None	None	None
phenethyl formate	None	None	1e-05	1e-05	1e-05	1e-05	None	1e-05	None	None	5e-06	None	None	None	None	None	None	None	None	None	None
phenethyl benzoate	None	None	1e-05	1e-05	1e-05	1e-05	1e-05	1e-05	1e-05	1e-05	5e-06	1e-05	1e-05	1e-05	2e-06	1e-05	1e-05	6.5e-06	6.5e-06	6.5e-06	6.5e-06
2-methy, 1-butanol	None	None	None	None	None	1e-05	1e-05	1e-05	1e-05	5e-06	5e-06	5e-06	5e-06	5e-06	5e-06	5e-06	5e-06	5e-06	5e-06	5e-06	5e-06
2,3-butanedione	None	None	None	None	None	1e-05	1e-05	1e-05	1e-05	1e-05	5e-06	1e-05	3e-05	5e-05	5e-05	3e-05	3e-05	3e-05	9.9999e-05	0.000499995	0.00149999
acetoin (1g/10mL h20, 10%)	None	None	None	None	None	1e-05	1e-05	1e-05	2e-05	1e-05	5e-06	1e-05	3e-05	5e-05	5e-05	3e-05	3e-05	3e-05	9.99999e-05	0.0005	0.0015
2,3-butanediol	None	None	None	None	None	None	None	None	None	None	None	None	None	None	None	None	None	None	None	None	None
propyl acetate	None	None	None	None	None	None	None	None	None	None	None	None	None	None	None	None	1e-05	6.5e-06	6.5e-06	6.5e-06	6.5e-06
ethyl isobutyrate	None	None	None	None	None	None	None	None	None	None	None	None	None	None	None	None	1e-05	6.5e-06	6.5e-06	6.5e-06	6.5e-06
ethyl hexanoate	None	None	None	None	None	None	None	None	None	None	None	None	None	None	None	None	1e-05	6.5e-06	6.5e-06	6.5e-06	6.5e-06
isovaleric acid, butyl ester	None	None	None	None	None	None	None	None	None	None	None	None	None	None	None	None	None	None	6.5e-06	6.5e-06	6.5e-06
ethyl octanoate	None	None	None	None	None	None	None	None	None	None	None	None	None	None	None	None	1e-05	6.5e-06	6.5e-06	6.5e-06	6.5e-06
ethyl decanoate	None	None	None	None	None	None	None	None	None	None	None	None	None	None	None	None	1e-05	6.5e-06	6.5e-06	6.5e-06	6.5e-06
ethyl laurate	None	None	None	None	None	None	None	None	None	None	None	None	None	None	None	None	1e-05	6.5e-06	6.5e-06	6.5e-06	6.5e-06

## Sheet: Calcs_#21_necessity
Volatile #	*make in 250ul of water; then mix with 250ul of AJM to achieve final	Concentration in culture (%)	Concentration in T-maze (%)	Concentration in T-maze (fraction)	metabolite added to H20 (ul)	Amount added of 0.1% dilution (5ul in 5mL) (except acetoin, which is 50ul in 5mL due to 10% solution)	#21	complete (=#21) = 27.7 h20; 222.3 with diluted water (all mixed with 250ul AJM)	No acid = 34.9 h20; 215.1 with diluted water (all mixed with 250ul AJM)	No purple = 177.7 h20; 72.3 with diluted water (all mixed with 250ul AJM)	No OH = 44.05 h20; 205.95 with diluted water (all mixed with 250ul AJM)	No ester = 76.45 h20; 173.55 with diluted water (all mixed with 250ul AJM)
1	Ethanol	1.14	0.57	0.0057	2.85	NA	2.85	2.85	2.85	2.85	REPLACE WITH H20	2.85
2	Isobutanol	0.0014	0.0007	7e-06	0.0035	3.5	3.5	3.5	3.5	3.5	REPLACE WITH H20	3.5
3	Acetic acid	2.88	1.44	0.0144	7.2	NA	7.2	7.2	REPLACE WITH H20	7.2	7.2	7.2
4	Isoamyl alcohol	0.0064	0.0032	3.2e-05	0.016	16	5	5	5	5	REPLACE WITH H20	5
5	Isoamyl acetate (1-butanol, 3-methyl acetate)	0.0013	0.00065	6.5e-06	0.00325	3.25	3.25	3.25	3.25	3.25	3.25	REPLACE WITH H20
6	acetal (1,1-Diethoxyethane)	?	0.01	0.0001	0.05	50	50	50	50	REPLACE WITH H20	50	50
7	acetaldehyde	?	0.01	0.0001	0.05	50	0	0	0	0	0	0
8	ethyl acetate	?	0.001	1e-05	0.005	5	3.25	3.25	3.25	3.25	3.25	REPLACE WITH H20
9	1-pentanol	?	0.001	1e-05	0.005	5	0	0	0	0	0	0
10	benzeneethanol (2-phenylethanol)	?	0.001	1e-05	0.005	5	2.5	2.5	2.5	2.5	REPLACE WITH H20	2.5
11	isobutyl acetate	?	0.001	1e-05	0.005	5	3.25	3.25	3.25	3.25	3.25	REPLACE WITH H20
12	2-phenethyl acetate	?	0.001	1e-05	0.005	5	3.25	3.25	3.25	3.25	3.25	REPLACE WITH H20
13	butyl acetate	?	0.001	1e-05	0.005	5	3.25	3.25	3.25	3.25	3.25	REPLACE WITH H20
14	2-methylbutyl acetate (1- butanol 2-methyl acetate)	?	0.001	1e-05	0.005	5	3.25	3.25	3.25	3.25	3.25	REPLACE WITH H20
15	methyl acetate	?	0.001	1e-05	0.005	5	3.25	3.25	3.25	3.25	3.25	REPLACE WITH H20
16	2-acetoxy-3-butanone (acetoin acetate)	?	0.001	1e-05	0.005	5	0	0	0	0	0	0
17	phenethyl formate	?	0.001	1e-05	0.005	5	0	0	0	0	0	0
18	phenethyl benzoate	?	0.001	1e-05	0.005	5	3.25	3.25	3.25	3.25	3.25	REPLACE WITH H20
19	2-methy, 1-butanol	?	0.001	1e-05	0.005	5	2.5	2.5	2.5	2.5	REPLACE WITH H20	2.5
20	2,3butanedione	?	0.001	1e-05	0.005	5	50 (5ul in 333ul)	50 (5ul in 333ul)	50 (5ul in 333ul)	REPLACE WITH H20	50 (5ul in 333ul)	50 (5ul in 333ul)
21	acetion (1g/10mL h20, 10%)	?	0.001	1e-05	0.005	5	50 (50ul in 333ul)	50 (50ul in 333ul)	50 (50ul in 333ul)	REPLACE WITH H20	50 (50ul in 333ul)	50 (50ul in 333ul)
22	2,3-butanediol	?	0.001	1e-05	0.005	5	0	0	0	0	0	0
23	propyl acetate						3.25	3.25	3.25	3.25	3.25	REPLACE WITH H20
24	valeric acid, 3 methyl						0	0	0	0	0	0
25	ethyl isobutyrate (410, box 8, Dennis, W242802)						3.25	3.25	3.25	3.25	3.25	REPLACE WITH H20
26	ethyl hexanoate						3.25	3.25	3.25	3.25	3.25	REPLACE WITH H20
27	isovaleric acid, butyl ester						3.25	3.25	3.25	3.25	3.25	REPLACE WITH H20
28	ethyl octanoate						3.25	3.25	3.25	3.25	3.25	REPLACE WITH H20
29	ethyl decanoate (1001, Nikki)						3.25	3.25	3.25	3.25	3.25	REPLACE WITH H20
30	ethyl laurate (734, Dennis, W244104, box 12)						3.25	3.25	3.25	3.25	3.25	REPLACE WITH H20

## Sheet: Calcs_#21_sufficiency
Volatile #	*make in 250ul of water; then mix with 250ul of AJM to achieve final	Concentration in culture (%)	Concentration in T-maze (%)	Concentration in T-maze (fraction)	metabolite added to H20 (ul)	Amount added of 0.1% dilution (5ul in 5mL) (except acetoin, which is 50ul in 5mL due to 10% solution)	#21	complete (=#21) = 27.7 h20; 222.3 metabolites in water (all mixed with 250ul AJM)	Acid only = 7.2 acid with 242.8 h20 (all mixed with 250ul AJM)	Acetaldehyde derivatives only = 100ul h20; 150 metabolites in water (all mixed with 250ul AJM)	OHs only = 233.65 H20; 16.35 metabolites in water (all mixed with 250ul AJM)	Ester only = 201.25 h20; 48.75 metabolites in water (all mixed with 250ul AJM)
1	Ethanol	1.14	0.57	0.0057	2.85	NA	2.85	2.85	0	0	2.85	0
2	Isobutanol	0.0014	0.0007	7e-06	0.0035	3.5	3.5	3.5	0	0	3.5	0
3	Acetic acid	2.88	1.44	0.0144	7.2	NA	7.2	7.2	7.2	0	0	0
4	Isoamyl alcohol	0.0064	0.0032	3.2e-05	0.016	16	5	5	0	0	5	0
5	Isoamyl acetate (1-butanol, 3-methyl acetate)	0.0013	0.00065	6.5e-06	0.00325	3.25	3.25	3.25	0	0	0	3.25
6	acetal (1,1-Diethoxyethane)	?	0.01	0.0001	0.05	50	50	50	0	50	0	0
7	acetaldehyde	?	0.01	0.0001	0.05	50	0	0	0	0	0	0
8	ethyl acetate	?	0.001	1e-05	0.005	5	3.25	3.25	0	0	0	3.25
9	1-pentanol	?	0.001	1e-05	0.005	5	0	0	0	0	0	0
10	benzeneethanol (2-phenylethanol)	?	0.001	1e-05	0.005	5	2.5	2.5	0	0	2.5	0
11	isobutyl acetate	?	0.001	1e-05	0.005	5	3.25	3.25	0	0	0	3.25
12	2-phenethyl acetate	?	0.001	1e-05	0.005	5	3.25	3.25	0	0	0	3.25
13	butyl acetate	?	0.001	1e-05	0.005	5	3.25	3.25	0	0	0	3.25
14	2-methylbutyl acetate (1- butanol 2-methyl acetate)	?	0.001	1e-05	0.005	5	3.25	3.25	0	0	0	3.25
15	methyl acetate	?	0.001	1e-05	0.005	5	3.25	3.25	0	0	0	3.25
16	2-acetoxy-3-butanone (acetoin acetate)	?	0.001	1e-05	0.005	5	0	0	0	0	0	0
17	phenethyl formate	?	0.001	1e-05	0.005	5	0	0	0	0	0	0
18	phenethyl benzoate	?	0.001	1e-05	0.005	5	3.25	3.25	0	0	0	3.25
19	2-methy, 1-butanol	?	0.001	1e-05	0.005	5	2.5	2.5	0	0	2.5	0
20	2,3butanedione	?	0.001	1e-05	0.005	5	50 (5ul in 333ul)	50 (5ul in 333ul)	0	50 (5ul in 333ul)	0	0
21	acetion (1g/10mL h20, 10%)	?	0.001	1e-05	0.005	5	50 (50ul in 333ul)	50 (50ul in 333ul)	0	50 (50ul in 333ul)	0	0
22	2,3-butanediol	?	0.001	1e-05	0.005	5	0	0	0	0	0	0
23	propyl acetate						3.25	3.25	0	0	0	3.25
24	valeric acid, 3 methyl						0	0	0	0	0	0
25	ethyl isobutyrate (410, box 8, Dennis, W242802)						3.25	3.25	0	0	0	3.25
26	ethyl hexanoate						3.25	3.25	0	0	0	3.25
27	isovaleric acid, butyl ester						3.25	3.25	0	0	0	3.25
28	ethyl octanoate						3.25	3.25	0	0	0	3.25
29	ethyl decanoate (1001, Nikki)						3.25	3.25	0	0	0	3.25
30	ethyl laurate (734, Dennis, W244104, box 12)						3.25	3.25	0	0	0	3.25

## Sheet: 10_6_mm_1_5
Experiment #	Fly Strain	Test Arm	Control Arm	Test Side	Time_Experiment	Center Flies	Experiment #	Left Arm	Right Arm	Left Side RI	Test Arm	Control Arm	Test Arm RI
1	Canton-S (CR)	Mock	Mock	L	11:00:00	7	1	26	26	0	26	26	0	0.134351
2	Canton-S (CR)	Mock	Mock	R	11:05:00	9	2	31	13	0.339623	13	31	-0.339623	#DIV/0!
3	Canton-S (CR)	Mock	Mock	L	11:10:00	11	3	22	13	0.195652	22	13	0.195652
4	Canton-S (CR)	Mock	Mock	R	11:15:00	11	4	25	12	0.270833	12	25	-0.270833
5	Canton-S (CR)	Mock	Mock	L	11:20:00		5			#DIV/0!	0	0	#DIV/0!
6	Canton-S (CR)	Mock	Mock	R	11:25:00		6			#DIV/0!	0	0	#DIV/0!
7	Canton-S (CR)	ScAm 96 h	AJM	L	11:55:00	0	7	44	18	0.419355	44	18	0.419355	0.507156
8	Canton-S (CR)	ScAm 96 h	AJM	R	12:00:00	3	8	9	37	-0.571429	37	9	0.571429
9	Canton-S (CR)	ScAm 96 h	AJM	L	12:05:00	2	9	47	17	0.454545	47	17	0.454545
10	Canton-S (CR)	ScAm 96 h	AJM	R	12:10:00	5	10	8	33	-0.543478	33	8	0.543478
11	Canton-S (CR)	ScAm 96 h	AJM	L	12:15:00	4	11	41	9	0.592593	41	9	0.592593
12	Canton-S (CR)	ScAm 96 h	AJM	R	12:20:00	6	12	11	35	-0.461538	35	11	0.461538
13	Canton-S (CR)	mm #1	AJM	L	12:50:00	6	13	35	15	0.357143	35	15	0.357143	0.427978
14	Canton-S (CR)	mm #1	AJM	R	12:55:00	3	14	17	40	-0.383333	40	17	0.383333
15	Canton-S (CR)	mm #1	AJM	b	13:00:00	2	15	41	30	0.150685	41	30	0.150685
16	Canton-S (CR)	mm #1	AJM	R	13:05:00	3	16	13	43	-0.508475	43	13	0.508475
17	Canton-S (CR)	mm #1	AJM	L	13:10:00	3	17	38	9	0.58	38	9	0.58
18	Canton-S (CR)	mm #1	AJM	R	13:15:00	9	18	6	36	-0.588235	36	6	0.588235
19	Canton-S (CR)	mm #2	AJM	L	13:45:00	8	19	32	19	0.220339	32	19	0.220339	0.275886
20	Canton-S (CR)	mm#2	AJM	R	13:50:00	4	20	14	34	-0.384615	34	14	0.384615
21	Canton-S (CR)	mm #2	AJM	L	13:55:00	2	21	26	16	0.227273	26	16	0.227273
22	Canton-S (CR)	mm #2	AJM	R	14:00:00	10	22	23	22	0.0181818	22	23	-0.0181818
23	Canton-S (CR)	mm #2	AJM	L	14:05:00	8	23	32	14	0.333333	32	14	0.333333
24	Canton-S (CR)	mm #2	AJM	R	14:10:00	5	24	13	45	-0.507937	45	13	0.507937
25	Canton-S (CR)	mm #3	AJM	L	14:40:00	3	25	36	12	0.470588	36	12	0.470588	0.42053
26	Canton-S (CR)	mm #3	AJM	R	14:45:00	2	26	18	35	-0.309091	35	18	0.309091
27	Canton-S (CR)	mm #3	AJM	L	14:50:00	2	27	39	6	0.702128	39	6	0.702128
28	Canton-S (CR)	mm #3	AJM	R	14:55:00	3	28	25	36	-0.171875	36	25	0.171875
29	Canton-S (CR)	mm #3	AJM	L	15:00:00	5	29	36	12	0.45283	36	12	0.45283
30	Canton-S (CR)	mm #3	AJM	R	15:05:00	4	30	12	32	-0.416667	32	12	0.416667
31	Canton-S (CR)	mm# 4	AJM	L	15:35:00	8	31	33	17	0.275862	33	17	0.275862	0.344887
32	Canton-S (CR)	mm #4	AJM	R	15:40:00	5	32	9	39	-0.566038	39	9	0.566038
33	Canton-S (CR)	mm #4	AJM	L	15:45:00	6	33	20	21	-0.0212766	20	21	-0.0212766
34	Canton-S (CR)	mm #4	AJM	R	15:50:00	5	34	15	32	-0.326923	32	15	0.326923
35	Canton-S (CR)	mm #4	AJM	L	15:55:00	7	35	34	14	0.363636	34	14	0.363636
36	Canton-S (CR)	mm #4	AJM	R	16:00:00	5	36	7	31	-0.55814	31	7	0.55814
37	Canton-S (CR)	mm #5	AJM	L	16:30:00	5	37	34	6	0.622222	34	6	0.622222	0.411909
38	Canton-S (CR)	mm #5	AJM	R	16:35:00	5	38	19	36	-0.283333	36	19	0.283333
39	Canton-S (CR)	mm #5	AJM	L	16:40:00	2	39	42	16	0.433333	42	16	0.433333
40	Canton-S (CR)	mm #5	AJM	R	16:45:00	4	40	16	48	-0.470588	48	16	0.470588
41	Canton-S (CR)	mm #5	AJM	L	16:50:00	7	41	23	16	0.152174	23	16	0.152174
42	Canton-S (CR)	mm #5	AJM	R	16:55:00	5	42	10	36	-0.509804	36	10	0.509804

## Sheet: 10_12_15_mm_6
Experiment #	Fly Strain	Test Arm	Control Arm	Test Side	Time_Experiment	Center Flies	Experiment #	Left Arm	Right Arm	Left Side RI	Test Arm	Control Arm	Test Arm RI
1	Canton-S (CR)	Mock	Mock	L	11:00:00	12	1	13	18	-0.116279	13	18	-0.116279	-0.0239433
2	Canton-S (CR)	Mock	Mock	R	11:05:00	11	2	17	19	-0.0425532	19	17	0.0425532	0.0719638
3	Canton-S (CR)	Mock	Mock	L	11:10:00	15	3	26	17	0.155172	26	17	0.155172
4	Canton-S (CR)	Mock	Mock	R	11:15:00	13	4	15	22	-0.14	22	15	0.14
5	Canton-S (CR)	Mock	Mock	L	11:20:00	16	5	19	17	0.0384615	19	17	0.0384615
6	Canton-S (CR)	Mock	Mock	R	11:25:00	13	6	20	31	-0.171875	31	20	0.171875
7	Canton-S (CR)	ScAm 96 h	AJM	L	11:30:00	7	7	35	13	0.4	35	13	0.4	0.489081
8	Canton-S (CR)	ScAm 96 h	AJM	R	11:35:00	6	8	10	43	-0.559322	43	10	0.559322
9	Canton-S (CR)	ScAm 96 h	AJM	L	11:40:00	5	9	51	17	0.465753	51	17	0.465753
10	Canton-S (CR)	ScAm 96 h	AJM	R	11:45:00	12	10	9	43	-0.53125	43	9	0.53125
11	Canton-S (CR)	ScAm 96 h	AJM	L	11:50:00		11			#DIV/0!	0	0	#DIV/0!
12	Canton-S (CR)	ScAm 96 h	AJM	R	11:55:00		12			#DIV/0!	0	0	#DIV/0!
13	Canton-S (CR)	Mix #6	AJM	L	12:25:00	8	13	44	12	0.5	44	12	0.5	0.450043
14	Canton-S (CR)	Mix #6	AJM	R	12:30:00	6	14	14	41	-0.442623	41	14	0.442623
15	Canton-S (CR)	Mix #6	AJM	L	12:35:00	8	15	39	11	0.482759	39	11	0.482759
16	Canton-S (CR)	Mix #6	AJM	R	12:40:00	3	16	22	47	-0.347222	47	22	0.347222
17	Canton-S (CR)	Mix #6	AJM	L	12:45:00	5	17	47	15	0.477612	47	15	0.477612
18	Canton-S (CR)	Mix #6	AJM	R	12:50:00		18			#DIV/0!	0	0	#DIV/0!
19	Canton-S (CR)	ScAm 96 h	Mix #6	L	13:20:00	6	1	27	13	0.304348	27	13	0.304348	0.237626
20	Canton-S (CR)	ScAm 96 h	Mix #6	R	13:25:00	7	2	36	33	0.0394737	33	36	-0.0394737
21	Canton-S (CR)	ScAm 96 h	Mix #6	L	13:30:00	9	3	33	15	0.315789	33	15	0.315789
22	Canton-S (CR)	ScAm 96 h	Mix #6	R	13:35:00	11	4	13	25	-0.244898	25	13	0.244898
23	Canton-S (CR)	ScAm 96 h	Mix #6	L	13:40:00	9	5	39	14	0.403226	39	14	0.403226
24	Canton-S (CR)	ScAm 96 h	Mix #6	R	13:45:00	9	6	22	35	-0.19697	35	22	0.19697

## Sheet: 10_19_mm_7_9
Experiment #	Fly Strain	Test Arm	Control Arm	Test Side	Time_Experiment	Center Flies	Experiment #	Left Arm	Right Arm	Left Side RI	Test Arm	Control Arm	Test Arm RI
1	Canton-S (CR)	Mock	Mock	L	11:00:00	8	1	18	24	-0.12	18	24	-0.12	-0.00698044
2	Canton-S (CR)	Mock	Mock	R	11:05:00	6	2	30	21	0.157895	21	30	-0.157895	0.0162718
3	Canton-S (CR)	Mock	Mock	L	11:10:00	10	3	22	17	0.102041	22	17	0.102041
4	Canton-S (CR)	Mock	Mock	R	11:15:00	9	4	18	28	-0.181818	28	18	0.181818
5	Canton-S (CR)	Mock	Mock	L	11:20:00	5	5	25	30	-0.0833333	25	30	-0.0833333
6	Canton-S (CR)	Mock	Mock	R	11:25:00	1	6	16	23	-0.175	23	16	0.175
7	Canton-S (CR)	ACV (25%)	H20	L	11:30:00	1	7	43	10	0.611111	43	10	0.611111	0.435587
8	Canton-S (CR)	ACV (25%)	H20	R	11:35:00	2	8	19	30	-0.215686	30	19	0.215686
9	Canton-S (CR)	ACV (25%)	H20	L	11:40:00	3	9	42	14	0.474576	42	14	0.474576
10	Canton-S (CR)	ACV (25%)	H20	R	11:45:00	2	10	13	35	-0.44	35	13	0.44
11	Canton-S (CR)	ACV (25%)	H20	L	11:50:00	1	11	44	10	0.618182	44	10	0.618182
12	Canton-S (CR)	ACV (25%)	H20	R	11:55:00	3	12	22	38	-0.253968	38	22	0.253968
13	Canton-S (CR)	Metabolite mixture 7	AJM	L	12:25:00	6	13	24	15	0.2	24	15	0.2	0.556484
14	Canton-S (CR)	Metabolite mixture 7	AJM	R	12:30:00	5	14	9	42	-0.589286	42	9	0.589286
15	Canton-S (CR)	Metabolite mixture 7	AJM	L	12:35:00	0	15	42	2	0.909091	42	2	0.909091
16	Canton-S (CR)	Metabolite mixture 7	AJM	R	12:40:00	1	16	11	43	-0.581818	43	11	0.581818
17	Canton-S (CR)	Metabolite mixture 7	AJM	L	12:45:00	1	17	53	12	0.621212	53	12	0.621212
18	Canton-S (CR)	Metabolite mixture 7	AJM	R	12:50:00	4	18	16	44	-0.4375	44	16	0.4375
19	Canton-S (CR)	Metabolite mixture 8	AJM	L	13:20:00	2	19	49	4	0.818182	49	4	0.818182	0.437262
20	Canton-S (CR)	Metabolite mixture 8	AJM	R	13:25:00	3	20	20	41	-0.328125	41	20	0.328125
21	Canton-S (CR)	Metabolite mixture 8	AJM	L	13:30:00	1	21	34	21	0.232143	34	21	0.232143
22	Canton-S (CR)	Metabolite mixture 8	AJM	R	13:35:00	2	22	11	32	-0.466667	32	11	0.466667
23	Canton-S (CR)	Metabolite mixture 8	AJM	L	13:40:00	1	23	26	20	0.12766	26	20	0.12766
24	Canton-S (CR)	Metabolite mixture 8	AJM	R	13:45:00	4	24	9	50	-0.650794	50	9	0.650794
25	Canton-S (CR)	Metabolite mixture 9	AJM	L	14:15:00	2	25	46	5	0.773585	46	5	0.773585	0.511924
26	Canton-S (CR)	Metabolite mixture 9	AJM	R	14:20:00	5	26	17	35	-0.315789	35	17	0.315789
27	Canton-S (CR)	Metabolite mixture 9	AJM	L	14:25:00	4	27	43	15	0.451613	43	15	0.451613
28	Canton-S (CR)	Metabolite mixture 9	AJM	R	14:30:00	3	28	15	33	-0.352941	33	15	0.352941
29	Canton-S (CR)	Metabolite mixture 9	AJM	L	14:35:00	5	29	45	8	0.637931	45	8	0.637931
30	Canton-S (CR)	Metabolite mixture 9	AJM	R	14:40:00	1	30	14	48	-0.539683	48	14	0.539683

## Sheet: 10_20_mm_10_15
Experiment #	Fly Strain	Test Arm	Control Arm	Test Side	Time_Experiment	Center Flies	Experiment #	Left Arm	Right Arm	Left Side RI	Test Arm	Control Arm	Test Arm RI
1	Canton-S (CR)	Mock	Mock	L	09:00:00	7	1	24	31	-0.112903	24	31	-0.112903	-0.0275891
2	Canton-S (CR)	Mock	Mock	R	09:05:00	10	2	25	25	0	25	25	0	-0.0549523
3	Canton-S (CR)	Mock	Mock	L	09:10:00	4	3	25	28	-0.0526316	25	28	-0.0526316
4	Canton-S (CR)	Mock	Mock	R	09:15:00	5	4	27	27	0	27	27	0
5	Canton-S (CR)	Mock	Mock	L	09:20:00	8	5	32	32	0	32	32	0
6	Canton-S (CR)	Mock	Mock	R	09:25:00	4	6	37	26	0.164179	26	37	-0.164179
7	Canton-S (CR)	Metabolite mixture 7	AJM	L	09:55:00		7			#DIV/0!	0	0	#DIV/0!	0.448927
8	Canton-S (CR)	Metabolite mixture 7	AJM	R	10:00:00	4	8	7	37	-0.625	37	7	0.625
9	Canton-S (CR)	Metabolite mixture 7	AJM	L	10:05:00	1	9	58	20	0.481013	58	20	0.481013
10	Canton-S (CR)	Metabolite mixture 7	AJM	R	10:10:00	2	10	20	49	-0.408451	49	20	0.408451
11	Canton-S (CR)	Metabolite mixture 7	AJM	L	10:15:00	1	11	47	11	0.610169	47	11	0.610169
12	Canton-S (CR)	Metabolite mixture 7	AJM	R	10:20:00	4	12	31	40	-0.12	40	31	0.12
13	Canton-S (CR)	Metabolite mixture 10	AJM	L	10:50:00	6	13	37	8	0.568627	37	8	0.568627	0.449058
14	Canton-S (CR)	Metabolite mixture 10	AJM	R	10:55:00	0	14	21	40	-0.311475	40	21	0.311475
15	Canton-S (CR)	Metabolite mixture 10	AJM	L	11:00:00	6	15	29	12	0.361702	29	12	0.361702
16	Canton-S (CR)	Metabolite mixture 10	AJM	R	11:05:00	3	16	17	48	-0.455882	48	17	0.455882
17	Canton-S (CR)	Metabolite mixture 10	AJM	L	11:10:00	4	17	40	11	0.527273	40	11	0.527273
18	Canton-S (CR)	Metabolite mixture 10	AJM	R	11:15:00	6	18	10	33	-0.469388	33	10	0.469388
19	Canton-S (CR)	Metabolite mixture 11	AJM	L	11:45:00	4	19	45	19	0.382353	45	19	0.382353	0.471163
20	Canton-S (CR)	Metabolite mixture 11	AJM	R	11:50:00	5	20	17	39	-0.360656	39	17	0.360656
21	Canton-S (CR)	Metabolite mixture 11	AJM	L	11:55:00	6	21	52	9	0.641791	52	9	0.641791
22	Canton-S (CR)	Metabolite mixture 11	AJM	R	12:00:00	4	22	11	37	-0.5	37	11	0.5
23	Canton-S (CR)	Metabolite mixture 11	AJM	L	12:05:00	3	23	38	12	0.490566	38	12	0.490566
24	Canton-S (CR)	Metabolite mixture 11	AJM	R	12:10:00	2	24	16	44	-0.451613	44	16	0.451613
25	Canton-S (CR)	Metabolite mixture 12	AJM	L	12:40:00	4	25	46	10	0.6	46	10	0.6	0.451428
26	Canton-S (CR)	Metabolite mixture 12	AJM	R	12:45:00	7	26	13	35	-0.4	35	13	0.4
27	Canton-S (CR)	Metabolite mixture 12	AJM	L	12:50:00	4	27	38	10	0.538462	38	10	0.538462
28	Canton-S (CR)	Metabolite mixture 12	AJM	R	12:55:00	1	28	13	41	-0.509091	41	13	0.509091
29	Canton-S (CR)	Metabolite mixture 12	AJM	L	13:00:00	4	29	38	17	0.355932	38	17	0.355932
30	Canton-S (CR)	Metabolite mixture 12	AJM	R	13:05:00	3	30	19	37	-0.305085	37	19	0.305085
31	Canton-S (CR)	Metabolite mixture 13	AJM	L	13:35:00	6	31	56	5	0.761194	56	5	0.761194	0.556428
32	Canton-S (CR)	Metabolite mixture 13	AJM	R	13:40:00	3	32	4	58	-0.830769	58	4	0.830769
33	Canton-S (CR)	Metabolite mixture 13	AJM	L	13:45:00	4	33	41	13	0.482759	41	13	0.482759
34	Canton-S (CR)	Metabolite mixture 13	AJM	R	13:50:00	1	34	15	36	-0.403846	36	15	0.403846
35	Canton-S (CR)	Metabolite mixture 13	AJM	L	13:55:00	1	35	33	16	0.34	33	16	0.34
36	Canton-S (CR)	Metabolite mixture 13	AJM	R	14:00:00	6	36	15	54	-0.52	54	15	0.52
37	Canton-S (CR)	Metabolite mixture 14	AJM	L	14:30:00	6	37	54	11	0.605634	54	11	0.605634	0.52587
38	Canton-S (CR)	Metabolite mixture 14	AJM	R	14:35:00	3	38	11	46	-0.583333	46	11	0.583333
39	Canton-S (CR)	Metabolite mixture 14	AJM	L	14:40:00	3	39	42	10	0.581818	42	10	0.581818
40	Canton-S (CR)	Metabolite mixture 14	AJM	R	14:45:00	3	40	13	39	-0.472727	39	13	0.472727
41	Canton-S (CR)	Metabolite mixture 14	AJM	L	14:50:00	2	41	47	16	0.476923	47	16	0.476923
42	Canton-S (CR)	Metabolite mixture 14	AJM	R	14:55:00	5	42	17	47	-0.434783	47	17	0.434783
43	Canton-S (CR)	Metabolite mixture 15	AJM	L	15:25:00	3	43	60	7	0.757143	60	7	0.757143	0.501954
44	Canton-S (CR)	Metabolite mixture 15	AJM	R	15:30:00	2	44	16	53	-0.521127	53	16	0.521127
45	Canton-S (CR)	Metabolite mixture 15	AJM	L	15:35:00	2	45	46	11	0.59322	46	11	0.59322
46	Canton-S (CR)	Metabolite mixture 15	AJM	R	15:40:00	5	46	15	35	-0.363636	35	15	0.363636
47	Canton-S (CR)	Metabolite mixture 15	AJM	L	15:45:00	4	47	28	15	0.276596	28	15	0.276596
48	Canton-S (CR)	Metabolite mixture 15	AJM	R	15:50:00	3	48	17	54	-0.5	54	17	0.5

## Sheet: M_10_26_15_mm_16_21
Experiment #	Fly Strain	Test Arm	Control Arm	Test Side	Time_Experiment	Center Flies	Experiment #	Left Arm	Right Arm	Left Side RI	Test Arm	Control Arm	Test Arm RI
1	Canton-S (CR)	Mock	Mock	L	09:00:00	7	1	31	32	-0.0142857	31	32	-0.0142857	0.0457439
2	Canton-S (CR)	Mock	Mock	R	09:05:00	7	2	29	29	0	29	29	0	-0.00489863
3	Canton-S (CR)	Mock	Mock	L	09:10:00	9	3	35	24	0.161765	35	24	0.161765
4	Canton-S (CR)	Mock	Mock	R	09:15:00	13	4	29	21	0.126984	21	29	-0.126984
5	Canton-S (CR)	Mock	Mock	L	09:20:00	8	5	22	19	0.0612245	22	19	0.0612245
6	Canton-S (CR)	Mock	Mock	R	09:25:00	6	6	32	25	0.111111	25	32	-0.111111
7	Canton-S (CR)	SCAM 96 h	AJM	L	09:55:00	5	7	57	8	0.7	57	8	0.7	0.694186
8	Canton-S (CR)	SCAM 96 h	AJM	R	10:00:00	3	8	1	47	-0.901961	47	1	0.901961
9	Canton-S (CR)	SCAM 96 h	AJM	L	10:05:00	1	9	50	10	0.655738	50	10	0.655738
10	Canton-S (CR)	SCAM 96 h	AJM	R	10:10:00	1	10	6	41	-0.729167	41	6	0.729167
11	Canton-S (CR)	SCAM 96 h	AJM	L	10:15:00	3	11	44	2	0.857143	44	2	0.857143
12	Canton-S (CR)	SCAM 96 h	AJM	R	10:20:00	1	12	17	34	-0.326923	34	17	0.326923
13	Canton-S (CR)	Metabolite mixture 16	AJM	L	10:50:00	4	13	47	15	0.484848	47	15	0.484848	0.424065
14	Canton-S (CR)	Metabolite mixture 16	AJM	R	10:55:00	3	14	22	37	-0.241935	37	22	0.241935
15	Canton-S (CR)	Metabolite mixture 16	AJM	b	11:00:00	4	15	42	19	0.353846	42	19	0.353846
16	Canton-S (CR)	Metabolite mixture 16	AJM	R	11:05:00	5	16	14	42	-0.459016	42	14	0.459016
17	Canton-S (CR)	Metabolite mixture 16	AJM	L	11:10:00	4	17	53	11	0.617647	53	11	0.617647
18	Canton-S (CR)	Metabolite mixture 16	AJM	R	11:15:00	2	18	18	42	-0.387097	42	18	0.387097
19	Canton-S (CR)	Metabolite mixture 17	AJM	L	11:45:00	3	19	37	16	0.375	37	16	0.375	0.41882
20	Canton-S (CR)	Metabolite mixture 17	AJM	R	11:50:00	3	20	19	49	-0.422535	49	19	0.422535
21	Canton-S (CR)	Metabolite mixture 17	AJM	L	11:55:00	4	21	44	14	0.483871	44	14	0.483871
22	Canton-S (CR)	Metabolite mixture 17	AJM	R	12:00:00	6	22	26	38	-0.171429	38	26	0.171429
23	Canton-S (CR)	Metabolite mixture 17	AJM	L	12:05:00	4	23	49	17	0.457143	49	17	0.457143
24	Canton-S (CR)	Metabolite mixture 17	AJM	R	12:10:00	3	24	12	53	-0.602941	53	12	0.602941
25	Canton-S (CR)	Metabolite mixture 18	AJM	L	12:40:00	4	25	51	16	0.492958	51	16	0.492958	0.440154
26	Canton-S (CR)	Metabolite mixture 18	AJM	R	12:45:00	5	26	16	36	-0.350877	36	16	0.350877
27	Canton-S (CR)	Metabolite mixture 18	AJM	L	12:50:00	2	27	46	18	0.424242	46	18	0.424242
28	Canton-S (CR)	Metabolite mixture 18	AJM	R	12:55:00	4	28	15	48	-0.492537	48	15	0.492537
29	Canton-S (CR)	Metabolite mixture 18	AJM	L	13:00:00		29			#DIV/0!	0	0	#DIV/0!
30	Canton-S (CR)	Metabolite mixture 18	AJM	R	13:05:00		30			#DIV/0!	0	0	#DIV/0!
31	Canton-S (CR)	Metabolite mixture 19	AJM	L	13:35:00	3	31	52	13	0.573529	52	13	0.573529	0.553625
32	Canton-S (CR)	Metabolite mixture 19	AJM	R	13:40:00	5	32	18	48	-0.422535	48	18	0.422535
33	Canton-S (CR)	Metabolite mixture 19	AJM	L	13:45:00	4	33	46	16	0.454545	46	16	0.454545
34	Canton-S (CR)	Metabolite mixture 19	AJM	R	13:50:00	5	34	6	61	-0.763889	61	6	0.763889
35	Canton-S (CR)	Metabolite mixture 19	AJM	L	13:55:00		35			#DIV/0!	0	0	#DIV/0!
36	Canton-S (CR)	Metabolite mixture 19	AJM	R	14:00:00		36			#DIV/0!	0	0	#DIV/0!
37	Canton-S (CR)	Metabolite mixture 20	AJM	L	14:30:00	1	37	58	5	0.828125	58	5	0.828125	0.647305
38	Canton-S (CR)	Metabolite mixture 20	AJM	R	14:35:00	2	38	14	49	-0.538462	49	14	0.538462
39	Canton-S (CR)	Metabolite mixture 20	AJM	L	14:40:00	3	39	56	10	0.666667	56	10	0.666667
40	Canton-S (CR)	Metabolite mixture 20	AJM	R	14:45:00	2	40	13	43	-0.517241	43	13	0.517241
41	Canton-S (CR)	Metabolite mixture 20	AJM	L	14:50:00	6	41	49	5	0.733333	49	5	0.733333
42	Canton-S (CR)	Metabolite mixture 20	AJM	R	14:55:00	2	42	12	51	-0.6	51	12	0.6
43	Canton-S (CR)	Metabolite mixture 21	AJM	L	15:25:00	0	43	66	9	0.76	66	9	0.76	0.750404
44	Canton-S (CR)	Metabolite mixture 21	AJM	R	15:30:00	4	44	7	57	-0.735294	57	7	0.735294
45	Canton-S (CR)	Metabolite mixture 21	AJM	L	15:35:00	3	45	43	9	0.618182	43	9	0.618182
46	Canton-S (CR)	Metabolite mixture 21	AJM	R	15:40:00	0	46	5	67	-0.861111	67	5	0.861111
47	Canton-S (CR)	Metabolite mixture 21	AJM	L	15:45:00	2	47	57	4	0.84127	57	4	0.84127
48	Canton-S (CR)	Metabolite mixture 21	AJM	R	15:50:00	1	48	10	56	-0.686567	56	10	0.686567

## Sheet: T_10_27_15
Experiment #	Fly Strain	Test Arm	Control Arm	Test Side	Time_Experiment	Center Flies	Experiment #	Left Arm	Right Arm	Left Side RI	Test Arm	Control Arm	Test Arm RI
1	Canton-S (CR)	Mock	Mock	L	09:00:00	8	1	38	24	0.2	38	24	0.2	0.0890853
2	Canton-S (CR)	Mock	Mock	R	09:05:00	13	2	36	24	0.164384	24	36	-0.164384	-0.0233315
3	Canton-S (CR)	Mock	Mock	L	09:10:00	8	3	34	31	0.0410959	34	31	0.0410959
4	Canton-S (CR)	Mock	Mock	R	09:15:00	8	4	31	23	0.129032	23	31	-0.129032
5	Canton-S (CR)	Mock	Mock	L	09:20:00	6	5	33	30	0.0434783	33	30	0.0434783
6	Canton-S (CR)	Mock	Mock	R	09:25:00	5	6	32	24	0.131148	24	32	-0.131148
7	Canton-S (CR)	SCAM 96 h	AJM	L	09:55:00	4	7	56	9	0.681159	56	9	0.681159	0.663742
8	Canton-S (CR)	SCAM 96 h	AJM	R	10:00:00	2	8	11	54	-0.641791	54	11	0.641791
9	Canton-S (CR)	SCAM 96 h	AJM	L	10:05:00	6	9	56	6	0.735294	56	6	0.735294
10	Canton-S (CR)	SCAM 96 h	AJM	R	10:10:00	5	10	11	57	-0.630137	57	11	0.630137
11	Canton-S (CR)	SCAM 96 h	AJM	L	10:15:00	1	11	58	8	0.746269	58	8	0.746269
12	Canton-S (CR)	SCAM 96 h	AJM	R	10:20:00	4	12	13	52	-0.565217	52	13	0.565217
13	Canton-S (CR)	Metabolite mixture 21	AJM	L	10:50:00	3	13	64	6	0.794521	64	6	0.794521	0.688217
14	Canton-S (CR)	Metabolite mixture 21	AJM	R	10:55:00	7	14	8	52	-0.656716	52	8	0.656716
15	Canton-S (CR)	Metabolite mixture 21	AJM	b	11:00:00	3	15	68	12	0.674699	68	12	0.674699
16	Canton-S (CR)	Metabolite mixture 21	AJM	R	11:05:00	5	16	9	46	-0.616667	46	9	0.616667
17	Canton-S (CR)	Metabolite mixture 21	AJM	L	11:10:00	4	17	58	8	0.714286	58	8	0.714286
18	Canton-S (CR)	Metabolite mixture 21	AJM	R	11:15:00	5	18	7	46	-0.672414	46	7	0.672414
19	Canton-S (CR)	SCAM 96 h	Metabolite mixture 21	L	11:45:00	8	19	25	29	-0.0645161	25	29	-0.0645161	-0.0834439
20	Canton-S (CR)	SCAM 96 h	Metabolite mixture 21	R	11:50:00	6	20	39	24	0.217391	24	39	-0.217391
21	Canton-S (CR)	SCAM 96 h	Metabolite mixture 21	L	11:55:00	2	21	43	41	0.0232558	43	41	0.0232558
22	Canton-S (CR)	SCAM 96 h	Metabolite mixture 21	R	12:00:00	4	22	41	27	0.194444	27	41	-0.194444
23	Canton-S (CR)	SCAM 96 h	Metabolite mixture 21	L	12:05:00	4	23	33	44	-0.135802	33	44	-0.135802
24	Canton-S (CR)	SCAM 96 h	Metabolite mixture 21	R	12:10:00	6	24	28	34	-0.0882353	34	28	0.0882353
25	Canton-S (CR)	Metabolite mixture 21 (No Acid)	AJM	L	12:40:00	5	25	45	6	0.696429	45	6	0.696429	0.662534
26	Canton-S (CR)	Metabolite mixture 21 (NoAcid)	AJM	R	12:45:00	8	26	9	55	-0.638889	55	9	0.638889
27	Canton-S (CR)	Metabolite mixture 21 (NoAcid)	AJM	L	12:50:00	4	27	65	9	0.717949	65	9	0.717949
28	Canton-S (CR)	Metabolite mixture 21 (NoAcid)	AJM	R	12:55:00	6	28	11	44	-0.540984	44	11	0.540984
29	Canton-S (CR)	Metabolite mixture 21 (NoAcid)	AJM	L	13:00:00	4	29	52	7	0.714286	52	7	0.714286
30	Canton-S (CR)	Metabolite mixture 21 (NoAcid)	AJM	R	13:05:00	1	30	9	47	-0.666667	47	9	0.666667
31	Canton-S (CR)	Metabolite mixture 21 (No Acetoin, acetal, 2,3 butanedione)	AJM	L	13:35:00	4	31	51	18	0.452055	51	18	0.452055	0.36969
32	Canton-S (CR)	Metabolite mixture 21 (No Acetoin, acetal, 2,3 butanedione)	AJM	R	13:40:00	4	32	17	33	-0.296296	33	17	0.296296
33	Canton-S (CR)	Metabolite mixture 21 (No Acetoin, acetal, 2,3 butanedione)	AJM	L	13:45:00	7	33	39	18	0.328125	39	18	0.328125
34	Canton-S (CR)	Metabolite mixture 21 (No Acetoin, acetal, 2,3 butanedione)	AJM	R	13:50:00	7	34	22	41	-0.271429	41	22	0.271429
35	Canton-S (CR)	Metabolite mixture 21 (No Acetoin, acetal, 2,3 butanedione)	AJM	L	13:55:00	4	35	54	18	0.473684	54	18	0.473684
36	Canton-S (CR)	Metabolite mixture 21 (No Acetoin, acetal, 2,3 butanedione)	AJM	R	14:00:00	5	36	15	38	-0.396552	38	15	0.396552
37	Canton-S (CR)	Metabolite mixture 21 (No esters)	AJM	L	14:30:00	3	37	62	5	0.814286	62	5	0.814286	0.703505
38	Canton-S (CR)	Metabolite mixture 21 (No esters)	AJM	R	14:35:00	4	38	13	47	-0.53125	47	13	0.53125
39	Canton-S (CR)	Metabolite mixture 21 (No esters)	AJM	L	14:40:00	0	39	65	5	0.857143	65	5	0.857143
40	Canton-S (CR)	Metabolite mixture 21 (No esters)	AJM	R	14:45:00	5	40	9	48	-0.629032	48	9	0.629032
41	Canton-S (CR)	Metabolite mixture 21 (No esters)	AJM	L	14:50:00	3	41	45	3	0.823529	45	3	0.823529
42	Canton-S (CR)	Metabolite mixture 21 (No esters)	AJM	R	14:55:00	3	42	15	58	-0.565789	58	15	0.565789
43	Canton-S (CR)	Metabolite mixture 21 (No OHs)	AJM	L	15:25:00	2	43	66	9	0.74026	66	9	0.74026	0.747232
44	Canton-S (CR)	Metabolite mixture 21 (No OHs)	AJM	R	15:30:00	3	44	3	53	-0.847458	53	3	0.847458
45	Canton-S (CR)	Metabolite mixture 21 (No OHs)	AJM	L	15:35:00	4	45	53	3	0.833333	53	3	0.833333
46	Canton-S (CR)	Metabolite mixture 21 (No OHs)	AJM	R	15:40:00	6	46	11	53	-0.6	53	11	0.6
47	Canton-S (CR)	Metabolite mixture 21 (No OHs)	AJM	L	15:45:00	5	47	57	7	0.724638	57	7	0.724638
48	Canton-S (CR)	Metabolite mixture 21 (No OHs)	AJM	R	15:50:00	6	48	5	50	-0.737705	50	5	0.737705

## Sheet: W_10_28_15
Experiment #	Fly Strain	Test Arm	Control Arm	Test Side	Time_Experiment	Center Flies	Experiment #	Left Arm	Right Arm	Left Side RI	Test Arm	Control Arm	Test Arm RI
1	Canton-S (CR)	Mock	Mock	L	09:00:00	6	1	31	26	0.0793651	31	26	0.0793651	0.0498626
2	Canton-S (CR)	Mock	Mock	R	09:05:00	4	2	34	23	0.180328	23	34	-0.180328	-0.0590565
3	Canton-S (CR)	Mock	Mock	L	09:10:00	5	3	22	27	-0.0925926	22	27	-0.0925926
4	Canton-S (CR)	Mock	Mock	R	09:15:00	8	4	26	19	0.132075	19	26	-0.132075
5	Canton-S (CR)	Mock	Mock	L	09:20:00	6	5	36	24	0.181818	36	24	0.181818
6	Canton-S (CR)	Mock	Mock	R	09:25:00	12	6	40	24	0.210526	24	40	-0.210526
7	Canton-S (CR)	SCAM 96 h	AJM	L	09:55:00	4	7	49	2	0.854545	49	2	0.854545	0.597542
8	Canton-S (CR)	SCAM 96 h	AJM	R	10:00:00	3	8	12	55	-0.614286	55	12	0.614286
9	Canton-S (CR)	SCAM 96 h	AJM	L	10:05:00	6	9	37	10	0.509434	37	10	0.509434
10	Canton-S (CR)	SCAM 96 h	AJM	R	10:10:00	2	10	11	52	-0.630769	52	11	0.630769
11	Canton-S (CR)	SCAM 96 h	AJM	L	10:15:00	2	11	58	9	0.710145	58	9	0.710145
12	Canton-S (CR)	SCAM 96 h	AJM	R	10:20:00	3	12	14	48	-0.523077	48	14	0.523077
13	Canton-S (CR)	Metabolite mixture 21	AJM	L	10:50:00	6	13	43	7	0.642857	43	7	0.642857	0.686393
14	Canton-S (CR)	Metabolite mixture 21	AJM	R	10:55:00	5	14	7	48	-0.683333	48	7	0.683333
15	Canton-S (CR)	Metabolite mixture 21	AJM	b	11:00:00	1	15	33	7	0.634146	33	7	0.634146
16	Canton-S (CR)	Metabolite mixture 21	AJM	R	11:05:00	1	16	7	58	-0.772727	58	7	0.772727
17	Canton-S (CR)	Metabolite mixture 21	AJM	L	11:10:00	1	17	52	6	0.779661	52	6	0.779661
18	Canton-S (CR)	Metabolite mixture 21	AJM	R	11:15:00	2	18	13	56	-0.605634	56	13	0.605634
19	Canton-S (CR)	SCAM 96 h	Metabolite mixture 21	L	11:45:00	4	19	42	19	0.353846	42	19	0.353846	0.333542
20	Canton-S (CR)	SCAM 96 h	Metabolite mixture 21	R	11:50:00	8	20	23	38	-0.217391	38	23	0.217391
21	Canton-S (CR)	SCAM 96 h	Metabolite mixture 21	L	11:55:00	5	21	36	20	0.262295	36	20	0.262295
22	Canton-S (CR)	SCAM 96 h	Metabolite mixture 21	R	12:00:00	8	22	19	52	-0.417722	52	19	0.417722
23	Canton-S (CR)	SCAM 96 h	Metabolite mixture 21	L	12:05:00	9	23	38	21	0.25	38	21	0.25
24	Canton-S (CR)	SCAM 96 h	Metabolite mixture 21	R	12:10:00	6	24	10	36	-0.5	36	10	0.5
25	Canton-S (CR)	SCAM 96 h	Metabolite mixture 21 (2X acetoin and 2,3 butanedione)	L	12:40:00	11	25	26	25	0.016129	26	25	0.016129	0.186213
26	Canton-S (CR)	SCAM 96 h	Metabolite mixture 21 (2X acetoin and 2,3 butanedione)	R	12:45:00	9	26	16	43	-0.397059	43	16	0.397059
27	Canton-S (CR)	SCAM 96 h	Metabolite mixture 21 (2X acetoin and 2,3 butanedione)	L	12:50:00	7	27	39	22	0.25	39	22	0.25
28	Canton-S (CR)	SCAM 96 h	Metabolite mixture 21 (2X acetoin and 2,3 butanedione)	R	12:55:00	6	28	19	38	-0.301587	38	19	0.301587
29	Canton-S (CR)	SCAM 96 h	Metabolite mixture 21 (2X acetoin and 2,3 butanedione)	L	13:00:00	2	29	28	24	0.0740741	28	24	0.0740741
30	Canton-S (CR)	SCAM 96 h	Metabolite mixture 21 (2X acetoin and 2,3 butanedione)	R	13:05:00	7	30	20	24	-0.0784314	24	20	0.0784314
31	Canton-S (CR)	Metabolite mixture 21 (Acetoin, acetal, 2,3 butanedione only)	AJM	L	13:35:00	6	31	49	8	0.650794	49	8	0.650794	0.594411
32	Canton-S (CR)	Metabolite mixture 21 (Acetoin, acetal, 2,3 butanedione only)	AJM	R	13:40:00	1	32	11	35	-0.510638	35	11	0.510638
33	Canton-S (CR)	Metabolite mixture 21 (Acetoin, acetal, 2,3 butanedione only)	AJM	L	13:45:00	3	33	51	8	0.693548	51	8	0.693548
34	Canton-S (CR)	Metabolite mixture 21 (Acetoin, acetal, 2,3 butanedione only)	AJM	R	13:50:00	10	34	12	38	-0.433333	38	12	0.433333
35	Canton-S (CR)	Metabolite mixture 21 (Acetoin, acetal, 2,3 butanedione only)	AJM	L	13:55:00	4	35	52	10	0.636364	52	10	0.636364
36	Canton-S (CR)	Metabolite mixture 21 (Acetoin, acetal, 2,3 butanedione only)	AJM	R	14:00:00	6	36	9	52	-0.641791	52	9	0.641791
37	Canton-S (CR)	SCAM 96 h	Metabolite mixture 21 (5X acetoin and 2,3 butanedione)	L	14:30:00	9	37	27	10	0.369565	27	10	0.369565	0.333681
38	Canton-S (CR)	SCAM 96 h	Metabolite mixture 21 (5X acetoin and 2,3 butanedione)	R	14:35:00	7	38	19	34	-0.25	34	19	0.25
39	Canton-S (CR)	SCAM 96 h	Metabolite mixture 21 (5X acetoin and 2,3 butanedione)	L	14:40:00	6	39	42	15	0.428571	42	15	0.428571
40	Canton-S (CR)	SCAM 96 h	Metabolite mixture 21 (5X acetoin and 2,3 butanedione)	R	14:45:00	9	40	17	31	-0.245614	31	17	0.245614
41	Canton-S (CR)	SCAM 96 h	Metabolite mixture 21 (5X acetoin and 2,3 butanedione)	L	14:50:00	12	41	38	14	0.375	38	14	0.375
42	Canton-S (CR)	SCAM 96 h	Metabolite mixture 21 (5X acetoin and 2,3 butanedione)	R	14:55:00	2	42	18	37	-0.333333	37	18	0.333333
43	Canton-S (CR)	SCAM 96 h	Metabolite mixture 21 (5X acetal)	L	15:25:00	11	43	32	17	0.25	32	17	0.25	0.189643
44	Canton-S (CR)	SCAM 96 h	Metabolite mixture 21 (5X acetal)	R	15:30:00	6	44	19	33	-0.241379	33	19	0.241379
45	Canton-S (CR)	SCAM 96 h	Metabolite mixture 21 (5X acetal)	L	15:35:00	7	45	33	30	0.0428571	33	30	0.0428571
46	Canton-S (CR)	SCAM 96 h	Metabolite mixture 21 (5X acetal)	R	15:40:00	6	46	16	29	-0.254902	29	16	0.254902
47	Canton-S (CR)	SCAM 96 h	Metabolite mixture 21 (5X acetal)	L	15:45:00	8	47	42	28	0.179487	42	28	0.179487
48	Canton-S (CR)	SCAM 96 h	Metabolite mixture 21 (5X acetal)	R	15:50:00	6	48	24	35	-0.169231	35	24	0.169231

[truncated: 1 more sheets: R_10_29_15]
