# Supplementary material for: Metabolite exchange between microbiome members produces compounds that influence Drosophila behavior
Source: eLife. 2017 Jan 9;6:e18855. doi: 10.7554/eLife.18855 (PMC5222558; doi:10.7554/eLife.18855)
Supplement: Figure 7—figure supplement 1—source data 1. — DOI: http://dx.doi.org/10.7554/eLife.18855.052 [file elife-18855-fig7-figsupp1-data1.xlsx]

## Sheet: Sheet1
#proportion alive
Time (h)	Ethanol							Ethanol/Acid							Acid							Water						Sang's
12	1	1	1	0.923077	1	1		1	1	1	0.944444	1	1		1	1	1	1	1	1		1	1	1	1	1		1	1	1	0.92	1
24	0.92	1	1	0.923077	1	1		1	1	1	0.888889	1	1		0.965517	0.96	1	1	1	1		1	0.903226	1	1	1		1	1	1	0.92	1
36	0.92	0.961538	1	0.923077	1	1		1	1	1	0.888889	1	1		0.931034	0.92	1	1	1	1		0.384615	0.451613	0.7	0.545455	0.85		1	1	1	0.92	1
48	0.92	0.961538	0.882353	0.923077	1	1		1	1	1	0.888889	1	1		0.931034	0.92	0.863636	1	1	1		0.153846	0.258064	0.35	0.272727	0.25		1	0.947368	1	0.92	1
60	0.88	0.961538	0.882353	0.923077	1	1		1	1	1	0.888889	1	1		0.896552	0.84	0.727273	1	1	1		0.0769231	0.225806	0.2	0.227273	0.1		1	0.947368	1	0.92	1
72	0.88	0.884615	0.882353	0.923077	0.875	1		1	1	1	0.888889	1	1		0.827586	0.52	0.681818	0.846154	0.941176	0.95		0.0384615	0.129032	0	0.181818	0.05		1	0.947368	1	0.92	0.947368
84	0.88	0.884615	0.882353	0.923077	0.875	0.933333		1	1	1	0.888889	1	1		0.689655	0.4	0.681818	0.769231	0.941176	0.85		0	0	0	0.136364	0		1	0.947368	1	0.92	0.947368
96	0.76	0.807692	0.823529	0.923077	0.875	0.866667		1	1	1	0.888889	0.954545	0.9375		0.551724	0.2	0.545455	0.538462	0.941176	0.7		0	0	0	0	0		1	0.947368	1	0.92	0.894737
108	0.72	0.769231	0.705882	0.769231	0.875	0.866667		0.909091	1	1	0.888889	0.954545	0.9375		0.344828	0.16	0.409091	0.153846	0.705882	0.6		0	0	0	0	0		1	0.947368	1	0.92	0.894737
120	0.48	0.5	0.588235	0.538462	0.75	0.733333		0.909091	1	0.958333	0.888889	0.863636	0.8125		0.241379	0.12	0.363636	0.0769231	0.470588	0.5		0	0	0	0	0		1	0.947368	1	0.92	0.894737
132	0.44	0.307692	0.588235	0.461539	0.25	0.533333		0.909091	1	0.916667	0.666667	0.863636	0.75		0.172414	0.08	0.363636	0.0769231	0.176471	0.3		0	0	0	0	0		1	0.947368	1	0.92	0.894737
144	0.2	0.153846	0.352941	0.307692	0.125	0.333333		0.909091	1	0.875	0.388889	0.636364	0.625		0.103448	0	0.181818	0.0769231	0.117647	0.15		0	0	0	0	0		1	0.947368	1	0.92	0.894737
156	0.12	0.0384615	0.294118	0.307692	0	0.2		0.818182	1	0.833333	0.388889	0.545455	0.5625		0	0	0.136364	0	0.117647	0.1		0	0	0	0	0		1	0.947368	1	0.92	0.842105
168	0.04	0.0384615	0.235294	0.153846	0	0.133333		0.818182	0.95	0.75	0.166667	0.318182	0.4375		0	0	0	0	0.117647	0.1		0	0	0	0	0		1	0.947368	1	0.88	0.631579
