# Supplementary material for: Metabolite exchange between microbiome members produces compounds that influence Drosophila behavior
Source: eLife. 2017 Jan 9;6:e18855. doi: 10.7554/eLife.18855 (PMC5222558; doi:10.7554/eLife.18855)
Supplement: Figure 7—source data 1. — DOI: http://dx.doi.org/10.7554/eLife.18855.049 [file elife-18855-fig7-data1.xlsx]

## Sheet: EXP1
CONDITION	EXPERIMENT NUMBER	TEST ARM	CONTROL ARM	RI	# FEMALES	# EGGS/ FEMALE
Mock (AJM vAJM)	1	71	83	-0.0779221	12	12.8333
Mock	2	131	108	0.0962343	23	10.3913
Mock	3	21	62	-0.493976	12	6.91667
Mock	4	35	97	-0.469697	11	12
Mock	5	100	38	0.449275	7	19.7143
Mock	6	47	24	0.323944	7	10.1429
Mock	7	143	77	0.3	16	13.75
WT v ADH	8	181	18	0.819095	13	15.3077
WT v ADH	9	184	16	0.84	14	14.2857
WT v ADH	10	110	4	0.929825	9	12.6667
WT v ADH	11	234	13	0.894737	24	10.2917
WT v ADH	12	273	24	0.838384	23	12.913
WT v ADH	13	170	6	0.931818	12	14.6667
WT v ADH	14	146	14	0.825	19	8.42105
WT v ADH	15	80	9	0.797753	9	9.88889

## Sheet: EXP2
	Test Arm	Cotnrol Arm	RI	Females
WT v ADH Co
1	45	0	1	6	7.5	0.993772
2	102	1	0.980583	15	6.86667
3	175	0	1	19	9.21053
4	156	2	0.974684	13	12.1538
5	96	0	1	11	8.72727
6	94	0	1	11	8.54545
7	125	0	1	8	15.625
8	144	0	1	20	7.2
9	76	0	1	14	5.42857
10	113	1	0.982456	22	5.18182
AJM v AJM
11	9	11	-0.1	13	1.53846	0.0638988
12	8	6	0.142857	13	1.07692
13	5	6	-0.0909091	15	0.733333
14	7	5	0.166667	7	1.71429
15	6	6	0	8	1.5
16	11	9	0.1	17	1.17647
17	23	9	0.4375	18	1.77778
18	39	11	0.56	17	2.94118
19	7	32	-0.641026	10	3.9
