# Supplementary material for: Metabolite exchange between microbiome members produces compounds that influence Drosophila behavior
Source: eLife. 2017 Jan 9;6:e18855. doi: 10.7554/eLife.18855 (PMC5222558; doi:10.7554/eLife.18855)
Supplement: Figure 7—source data 2. — DOI: http://dx.doi.org/10.7554/eLife.18855.050 [file elife-18855-fig7-data2.xlsx]

## Sheet: Exp1_ExposuretoPathogen
Egg Laying				Larval hatching							Larval development					Total Pupae												Total Adults (Cumulative)
Condition	Number	# Eggs		# Hatch 14 h	Proportion Hatch 14 h	# Hatch 19 h	Proportion Hatch 19 h	# Hatch 24 h	Proportion Hatch 24 h		3d (Wed September 9/21)	4d	5d	10 d Wed 9/28		11 d	12 d	13 d	14 d	15 d	16 d	17 d	18 d	19 d	20d	21d		12 d	13 d (10/1)	14 d	15 d	16 d	17 d	18 d	19 d	20d	21 d (10/9)
WT	1	49		3	0.0612245	8	0.163265	31	0.632653		All similar (dropped all plates)	All similar	All similar	33		0	7	13	22	28	29	29						0	0	0	0	3	9	15	23	27	27
WT	2	87		1	0.0114943	13	0.149425	63	0.724138					15		0	3	8	11	13	13	17						0	0	0	0	2	6	7	10	11	12
WT	3	105		1	0.00952381	20	0.190476	84	0.8					75		0	1	4	17	40	44	54						0	0	0	0	1	3	10	30	41	42
WT	4	90		1	0.0111111	20	0.222222	64	0.711111					15		0	2	6	8	9	12	12						0	0	0	0	1	3	5	6	7	7
WT	5	91		1	0.010989	15	0.164835	67	0.736264					29		1	8	11	18	23	26	26						0	0	0	3	4	8	11	18	20	22
WT	6	108		1	0.00925926	16	0.148148	86	0.796296					46		0	2	5	14	23	32	34						0	0	0	0	2	5	8	24	31	33
adhA	1	65		1	0.0153846	15	0.230769	42	0.646154					2		1	1	1	2	0	1	0						0	1	2	2	2	2	2	2	2	2
adhA	2	69		2	0.0289855	17	0.246377	52	0.753623					4		3	2	2	2	2	2	2						0	0	0	0	0	0	0	0	0	0
adhA	3	38		2	0.0526316	15	0.394737	23	0.605263					0		0	1	0	0	0	1	0						0	0	0	0	0	0	0	0	0	0
adhA	4	89		1	0.011236	17	0.191011	60	0.674157					3		2	3	3	2	1	1	1						0	0	0	1	1	1	1	1	1	1
adhA	5	59		1	0.0169492	12	0.20339	40	0.677966					1		1	0	1	1	1	1	1						0	0	0	0	0	0	0	0	0	0
adhA	6	65		2	0.0307692	18	0.276923	49	0.753846					0		0	0	0	1	1	0	0						0	0	0	0	0	0	0	0	0	0
WT	1	90		1	0.0111111	15	0.166667	62	0.688889					20		1	6	7	9	10	9	9						0	0	1	0	3	5	6	7	7	7
WT	2	72		3	0.0416667	18	0.25	52	0.722222					42		0	5	7	19	35	40	41						0	0	0	2	2	3	11	28	34	36
WT	3	114		1	0.00877193	16	0.140351	74	0.649123					30		0	3	4	13	22	29	30						0	2	2	2	3	6	10	19	21	22
WT	4	78		3	0.0384615	15	0.192308	64	0.820513					67		3	4	13	39	51	55	57						0	0	0	0	3	8	26	41	45	47
WT	5	84		2	0.0238095	20	0.238095	56	0.666667					34		0	3	5	16	25	31	33						0	0	0	0	3	4	9	19	26	28
WT	6	101		0	0	14	0.138614	69	0.683168					41		0	1	5	9	16	18	24						0	0	0	0	0	3	6	11	14	18
adhA	1	72		2	0.0277778	15	0.208333	48	0.666667					3		0	2	2	2	1	1	1						0	0	0	0	1	1	1	1	1	1
adhA	2	63		0	0	7	0.111111	43	0.68254					8		1	2	2	1	1	1	1						0	0	0	0	0	0	0	0	0	0
adhA	3	79		0	0	15	0.189873	51	0.64557					0		0	0	0	0	0	0	0						0	0	0	0	0	0	0	0	0	0
adhA	4	59		3	0.0508475	17	0.288136	35	0.59322					5		0	0	0	0	0	0	0						0	0	0	0	0	0	0	0	0	0
adhA	5	44		3	0.0681818	12	0.272727	29	0.659091					9		3	10	11	11	11	8	8						0	0	1	4	6	6	6	6	6	6
adhA	6	91		1	0.010989	13	0.142857	62	0.681319					1		1	3	3	3	1	1	0						0	0	0	1	1	1	1	1	1	1
General observations														See pics;All WT = free of fungal growth; All adh = fungal growth; same of single replicates with no eggs
Observations Larvae

## Sheet: Exp2_ExposureNoExposure
PLATES
Egg Laying			Larval hatching			Larval development (Total pupae)												Larval development (Total adults)
Condition	# Eggs		# Hatch 24 h	Proportion Hatch 24 h		Treatment (D3)	Condition	Observ	D11 (Thur 10/13)	D16 (Tue 10/18)	D17	D18	D19	D20				Treatment (D3)	Condition	D16 (Tue 10/18)	D17	D18 Thu	D19	D20	D21
WT_1	141		110	0.780142		Floor exposure	WT_1			44	50	52						Floor exposure	WT_1	3	6	21	31	36	4
WT_2	153		132	0.862745		Floor exposure	WT_2			29	32	40						Floor exposure	WT_2	1	3	13	19	33	40
WT_3	131		108	0.824427		Floor exposure	WT_3			31	35	41						Floor exposure	WT_3	15	22	24	26	27	27
WT_4	131		97	0.740458		Floor exposure	WT_4			36	41	44						Floor exposure	WT_4	3	5	16	22	32	35
WT_5	90		64	0.711111		Floor exposure	WT_5			51	56	56						Floor exposure	WT_5	1	1	15	28	42	43
WT_6	138		105	0.76087		Floor exposure	WT_6			51	59	60						Floor exposure	WT_6	2	16	36	48	56	58
adhA_1	108		79	0.731481		Floor exposure	adhA_1	Mold		0	0	0						Floor exposure	adhA_1	0	0	0	0	0	0
adhA_2	79		67	0.848101		Floor exposure	adhA_2	harmful growth? (see pic)		17	17	17						Floor exposure	adhA_2	5	9	9	9	9	10
adhA_3	56		40	0.714286		Floor exposure	adhA_3	harmful growth? (see pic) Mold		2	2	2						Floor exposure	adhA_3	0	0	1	1	1	1
adhA_4	53		31	0.584906		Floor exposure	adhA_4	harmful growth?		3	3	6						Floor exposure	adhA_4	0	0	0	1	1	1
adhA_5	105		75	0.714286		Floor exposure	adhA_5	Mold		16	17	17						Floor exposure	adhA_5	0	0	0	0	0	0
adhA_6	86		70	0.813953		Floor exposure	adhA_6	Mold		16	16	16						Floor exposure	adhA_6	7	9	9	9	9	9
TUBES
Larval development (total pupae)		D6	D7	D8	D9	D10	D11 (Thur 10/13)	D16	Larval development (total adults)		D10	D11 (Thur 10.13	D16 Tue
Condition	Treatment (D3)								Condition	Treatment (D3)
No exposure	WT_1	0	0	0	0	0	0	0	No exposure	WT_1	0	0	0
No exposure	WT_2	0	0	0	0	0	0	14	No exposure	WT_2	0	0	0
No exposure	WT_3	0	0	0	0	0	0	4	No exposure	WT_3	0	0	0
No exposure	WT_4	0	0	0	0	0	0	7	No exposure	WT_4	0	0	0
No exposure	WT_5	0	0	0	0	0	0	0	No exposure	WT_5	0	0	0
No exposure	adhA_1	4	22	25	25	25	27	27	No exposure	adhA_1	0	18	22
No exposure	adhA_2	0	0	0	1	2	5	25	No exposure	adhA_2	0	0	0
No exposure	adhA_3	0	8	25	43	47	51	55	No exposure	adhA_3	0	2	36
No exposure	adhA_4	0	10	23	32	32	36	38	No exposure	adhA_4	0	5	34
No exposure	adhA_5	0	9	26	35	39	41	41	No exposure	adhA_5	0	3	31
