# Supplementary material for: Metabolite exchange between microbiome members produces compounds that influence Drosophila behavior
Source: eLife. 2017 Jan 9;6:e18855. doi: 10.7554/eLife.18855 (PMC5222558; doi:10.7554/eLife.18855)
Supplement: Table 1—source data 4. — DOI: http://dx.doi.org/10.7554/eLife.18855.022 [file elife-18855-table1-data4.xlsx]

## Sheet: 6_16_15
	Rep 1		Rep 2		Rep 3
Solvent	m/z Abundance	RT	m/z Abundance	RT	m/z Abundance	RT
5.9_45.1	0	NA	0	NA	0	NA
6.13_74.1	0	NA	0	NA	0	NA
6.27_60.05	0	NA	0	NA	0	NA
6.67_70.1	0	NA	0	NA	0	NA
8.33_87.1	0	NA	0	NA	0	NA
Beads
5.9_45.1	0	NA	0	NA	0	NA
6.13_74.1	0	NA	0	NA	0	NA
6.27_60.05	0	NA	0	NA	0	NA
6.67_70.1	0	NA	0	NA	0	NA
8.33_87.1	0	NA	0	NA	0	NA
AJM_24
5.9_45.1	174336	5.913	100696	6.18	122672	6.148
6.13_74.1	0	NA	0	NA	0	NA
6.27_60.05	0	NA	0	NA	0	NA
6.67_70.1	38624	6.591	10856	6.813	20200	6.772
8.33_87.1	0	NA	0	NA	0	NA
AJM_36
5.9_45.1	117104	5.884	248512	5.9	108864	6.077
6.13_74.1	0	NA	0	NA	0	NA
6.27_60.05	0	NA	0	NA	0	NA
6.67_70.1	2353	6.563	5207	6.576	2127	6.717
8.33_87.1	0	NA	0	NA	0	NA
AJM_48
5.9_45.1	123216	5.913	58984	6.18	91768	5.897
6.13_74.1	0	NA	0	NA	0	NA
6.27_60.05	0	NA	0	NA	0	NA
6.67_70.1	4027	6.595	1937	6.836	2724	6.575
8.33_87.1	0	NA	0	NA	0	NA
AJM_60
5.9_45.1	136576	5.916	88776	6.157	69832	6.164
6.13_74.1	0	NA	0	NA	0	NA
6.27_60.05	0	NA	0	NA	0	NA
6.67_70.1	2003	6.607	0	NA	0	NA
8.33_87.1	0	NA	0	NA	0	NA
AJM_72
5.9_45.1	186496	5.916	64504	5.891	35208	6.167
6.13_74.1	0	NA	0	NA	0	NA
6.27_60.05	0	NA	0	NA	0	NA
6.67_70.1	0	NA	0	NA	0	NA
8.33_87.1	0	NA	0	NA	0	NA
AJM_84
5.9_45.1	47912	5.9	86312	6.148	187776	5.894
6.13_74.1	0	NA	0	NA	0	NA
6.27_60.05	0	NA	0	NA	0	NA
6.67_70.1	0	NA	0	NA	0	NA
8.33_87.1	0	NA	0	NA	0	NA
AJM_96
5.9_45.1	28760	5.91	27776	6.157	35568	6.08
6.13_74.1	0	NA	0	NA	0	NA
6.27_60.05	0	NA	0	NA	0	NA
6.67_70.1	0	NA	0	NA	0	NA
8.33_87.1	0	NA	0	NA	0	NA
SC_24
5.9_45.1	402496	5.884	305984	5.888	382784	5.875
6.13_74.1	2061	6.09	2343	6.087	1435	6.103
6.27_60.05
6.67_70.1	38768	6.527	47440	6.527	43144	6.514
8.33_87.1
SC_36
5.9_45.1	398080	6.103	4583424	5.884	7123968	5.884
6.13_74.1	15782	6.302	111312	6.087	145728	6.083
6.27_60.05
6.67_70.1	247296	6.714	1350144	6.556	1643008	6.547
8.33_87.1
SC_48
5.9_45.1	8388096 (max?)	5.894	8388096	5.881	8388096	5.878
6.13_74.1	399296	6.099	126952	6.109	182592	6.08
6.27_60.05
6.67_70.1	3491328	6.611	3666944	6.582	2766848	6.572
8.33_87.1	0	NA	1085	8.09	0	NA
SC_60
5.9_45.1	7070720	5.881	8388096	5.874	6899200	5.878
6.13_74.1	146880	6.084	207040	6.074	241536	6.08
6.27_60.05
6.67_70.1	2570752	6.572	3280896	6.575	2955776	6.572
8.33_87.1
SC_72
5.9_45.1	8388096	5.875	8388096	5.874	8388096	5.878
6.13_74.1	310656	6.077	389440	6.08	208384	6.08
6.27_60.05
6.67_70.1	3077120	6.572	3234816	6.579	3055616	6.579
8.33_87.1
SC_84
5.9_45.1	8388096	5.871	8388096	5.868	8373760	5.881
6.13_74.1	226624	6.071	209216	6.071	126392	6.08
6.27_60.05
6.67_70.1	2576896	6.55	2568192	6.556	2402304	6.566
8.33_87.1
SC_96
5.9_45.1	8388096	5.874	8388096	6.006	8388096	5.876
6.13_74.1	113288	6.074	155392	6.202	124024	6.067
6.27_60.05
6.67_70.1	2072576	6.553	2060800	6.662	1952768	6.534
8.33_87.1
AM_24
5.9_45.1	177600	5.884	72560	5.89	122232	5.891
6.13_74.1	0	NA	0	NA	0	NA
6.27_60.05	0	NA	0	NA	0	NA
6.67_70.1	14891	6.553	12779	6.562	11143	6.559
8.33_87.1	0	NA	0	NA	0	NA
AM_36	0	NA	0	NA	0	NA
5.9_45.1	67860	6.084	98120	5.887	46576	5.9
6.13_74.1	0	NA	0	NA	0	NA
6.27_60.05	0	NA	0	NA	0	NA
6.67_70.1	2840	6.723	3048	6.566	4198	6.563
8.33_87.1	0	NA	0	NA	0	NA
AM_48	0	NA	0	NA	0	NA
5.9_45.1	38872	5.884	76448	6.087	60168	5.887
6.13_74.1	0	NA	0	NA	0	NA
6.27_60.05	0	NA	0	NA	0	NA
6.67_70.1	1017	6.553	0	NA	0	NA
8.33_87.1	0	NA	0	NA	0	NA
AM_60
5.9_45.1	85168	5.875	71808	5.894	31304	5.897
6.13_74.1	0	NA	0	NA	0	NA
6.27_60.05	9255	6.042	0	NA	0	NA
6.67_70.1	0	NA	0	NA	0	NA
8.33_87.1	0	NA	0	NA	0	NA
AM_72
5.9_45.1	42856	5.874	32168	5.887	0	NA
6.13_74.1	0	NA	0	NA	0	NA
6.27_60.05	0	NA	0	NA	0	NA
6.67_70.1	0	NA	0	NA	0	NA
8.33_87.1	0	NA	0	NA	0	NA
AM_84
5.9_45.1	29560	5.878	37216	5.897	43416	5.884
6.13_74.1	0	NA	0	NA	7872	6.225
6.27_60.05	0	NA	0	NA	24096	6.071
6.67_70.1	0	NA	0	NA	0	NA
8.33_87.1	0	NA	0	NA	0	NA
AM_96
5.9_45.1	0	NA	0	NA	0	NA
6.13_74.1	0	NA	0	NA	0	NA
6.27_60.05	0	NA	0	NA	0	NA
6.67_70.1	0	NA	0	NA	0	NA
8.33_87.1	0	NA	0	NA	0	NA
SCAM_24
5.9_45.1	877312	5.887	319616	5.871	1302016	5.871
6.13_74.1	1231	6.116	1893	6.215	1375	6.068
6.27_60.05	0	0	13084	6.032	6769	6.039
6.67_70.1	31272	6.534	39120	6.492	35600	6.495
8.33_87.1	0	NA	0	NA	0	NA
SCAM_36
5.9_45.1	8388096	5.913	7745024	5.903	6965248	5.913
6.13_74.1	104240	6.122	70240	6.109	71000	6.119
6.27_60.05	251968	6.161	301440	6.157	359104	6.174
6.67_70.1	2104320	6.62	1293824	6.585	1588224	6.598
8.33_87.1	0	NA	0	NA	0	NA
SCAM_48
5.9_45.1	7372800	5.929	6005248	6.106	6500864	5.923
6.13_74.1	87248	6.145	60000	6.135	69776	6.135
6.27_60.05	1367552	6.215	3149312	6.437	878592	6.238
6.67_70.1	3124736	6.659	3255808	6.794	2945024	6.653
8.33_87.1	0	NA	0	NA	0	NA
SCAM_60
5.9_45.1	1976832	5.926	1267712	5.939	3576320	5.942
6.13_74.1	52176	6.138	29040	6.18	39144	6.164
6.27_60.05	4168192		8388096	6.322	3942912	6.309
6.67_70.1	2604032	6.646	2048512	6.646	2263552	6.678
8.33_87.1	4357	8.18	10401	8.193	1979	8.299
SCAM_72
5.9_45.1	978688	5.942	1091584	5.939	1598464	5.91
6.13_74.1	25240	6.167	10867	6.167	29120	6.138
6.27_60.05	8007680	6.338	6606336	6.331	6293504	6.289
6.67_70.1	2125824	6.669	317632	6.65	2176000	6.627
8.33_87.1	21656	8.225	3843	8.338	15451	8.186
SCAM_84
5.9_45.1	1419264	5.916	1560064	6.141	1541120	5.91
6.13_74.1	17872	6.141	14329	6.357	20424	6.132
6.27_60.05	6740992	6.299	8388096		7203840	6.289
6.67_70.1	786688	6.614	381248	6.807	890624	6.608
8.33_87.1	23864	8.199	12483	8.395	19280	8.189
SCAM_96
5.9_45.1	829312	5.939	800576	5.916	415296	5.936
6.13_74.1	16336	6.138	12948	6.145	5065	6.157
6.27_60.05	8275968	6.341	7177216	6.302	4910592	6.305
6.67_70.1	255040	6.575	325120	6.601	97768	6.63
8.33_87.1	12444	8.103	9367	8.193	3414	8.296
STANDARDS_INJECTED
AA_5MM	1137664	6.228
AA_500UM	86480		13.1552
AA_50UM	1975		43.7873
ETOH_5mM	1561600	5.932
ETOH_500uM	270336		5.77652
ETOH_50uM	21976		12.3014
IAA_5mM	4617216	6.707
IAA_500uM	580288	6.511	7.95677
IAA_50uM	18952		30.6188
IB_5mM	495104
IB_500uM	62008		7.98452
IB_50uM	1976		31.3806
IPA_5mM	1471488
IPA_500uM	119136	8.067	12.3513
IPA_50uM	2432		48.9868
STANDARDS_VOLATILE
AA_3p	7147008	6.363	83.5087
ETOH_3p	2606080	5.952	8.35625
IB_0.03p	162496	6.199	5.68327
IAA_0.03p	4058112	6.746	18.6275
IPA_0.03p	1350144	8.517	11.2392
AA_0.3p	85584	6.077	4.8827
ETOH_0.3p	311872	5.884	20.8875
IB_0.003p	28592	6.077	14.2889
IAA_0.003p	217856	6.505	16.4271
IPA_0.003p	120128	8.08	64.3084
AA_0.03p	17528	6.212
ETOH_0.03p	14931	5.871
IB_0.0003p	2001	6.215
IAA_0.0003p	13262	6.492
IPA_0.0003p	1868	8.077

## Sheet: 6_26_15
	Rep 1		Rep 2		Rep 3
Solvent	m/z Abundance	RT	m/z Abundance	RT	m/z Abundance	RT
5.9_45.1	0	NA	0	NA	0	NA
6.13_74.1	0	NA	0	NA	0	NA
6.27_60.05	0	NA	0	NA	0	NA
6.67_70.1	0	NA	0	NA	0	NA
8.33_87.1	0	NA	0	NA	0	NA
Beads
5.9_45.1	0	NA	0	NA	0	NA
6.13_74.1	0	NA	0	NA	0	NA
6.27_60.05	0	NA	0	NA	0	NA
6.67_70.1	0	NA	0	NA	0	NA
8.33_87.1	0	NA	0	NA	0	NA
AJM_24
5.9_45.1	174336	5.913	100696	6.18	122672	6.148
6.13_74.1	0	NA	0	NA	0	NA
6.27_60.05	0	NA	0	NA	0	NA
6.67_70.1	38624	6.591	10856	6.813	20200	6.772
8.33_87.1	0	NA	0	NA	0	NA
AJM_36
5.9_45.1	117104	5.884	248512	5.9	108864	6.077
6.13_74.1	0	NA	0	NA	0	NA
6.27_60.05	0	NA	0	NA	0	NA
6.67_70.1	2353	6.563	5207	6.576	2127	6.717
8.33_87.1	0	NA	0	NA	0	NA
AJM_48
5.9_45.1	112624	5.881	61944	6.132	81704	5.913
6.13_74.1	0	NA	0	NA	0	NA
6.27_60.05	0	NA	0	NA	0	NA
6.67_70.1	2019	6.534	1946	6.723	971	6.559
8.33_87.1	0	NA	0	NA	0	NA
AJM_60
5.9_45.1	130512	5.894	45784	6.109	32056	6.142
6.13_74.1	0	NA	0	NA	0	NA
6.27_60.05	0	NA	0	NA	0	NA
6.67_70.1	1186	6.553	1634	6.701	1683	6.754
8.33_87.1	0	NA	0	NA	0	NA
AJM_72
5.9_45.1	71920	5.888	36928	6.128	32208	6.132
6.13_74.1	0	NA	0	NA	0	NA
6.27_60.05	0	NA	0	NA	0	NA
6.67_70.1	688	6.547	1517	6.723	0	NA
8.33_87.1	0	NA	0	NA	0	NA
AJM_84
5.9_45.1	65832	5.897	30088	6.1	17864	6.135
6.13_74.1	0	NA	0	NA	0	NA
6.27_60.05	0	NA	0	NA	0	NA
6.67_70.1	0	NA	0	NA	0	NA
8.33_87.1	0	NA	0	NA	0	NA
AJM_96
5.9_45.1	25184	5.891	47288	6.135	20048	6.093
6.13_74.1	0	NA	0	NA	0	NA
6.27_60.05	0	NA	0	NA	0	NA
6.67_70.1	0	NA	3981	6.733	0	NA
8.33_87.1	0	NA	0	NA	0	NA
SC_24
5.9_45.1	534336	5.878	688128	5.878	635520	5.878
6.13_74.1	0	NA	0	NA	937	6.074
6.27_60.05	0	NA	0	NA	0	NA
6.67_70.1	20296	6.514	25992	6.495	26136	6.501
8.33_87.1	0	NA	0	NA	0	NA
SC_36
5.9_45.1	5085696	5.887	5883392	5.878	4959232	5.878
6.13_74.1	33424	6.09	33040	6.074	38416	6.077
6.27_60.05	0	NA	0	NA	0	NA
6.67_70.1	576512	6.55	613056	6.524	644800	6.537
8.33_87.1	0	NA	0	NA	0	NA
SC_48
5.9_45.1	6598144	5.875	8388096	5.884	8388096	5.884
6.13_74.1	83560	6.074	104288	6.08	89856	6.08
6.27_60.05	0	NA	0	NA	0	NA
6.67_70.1	1439232	6.556	1727488	6.559	1673216	6.566
8.33_87.1	0	NA	0	NA	0	NA
SC_60
5.9_45.1	8388096	5.878	8388096	5.881	8104448	5.881
6.13_74.1	143168	6.077	90608	6.08	120192	6.077
6.27_60.05	0	NA	0	NA	0	NA
6.67_70.1	1861120	6.566	1679360		1736192	6.553
8.33_87.1	0	NA	0	NA	0	NA
SC_72
5.9_45.1	8388096	5.865	7871488	5.868	5400064	5.881
6.13_74.1	104520	6.061	89912	6.064	48144	6.077
6.27_60.05	0	NA	0	NA	0	NA
6.67_70.1	1570816	6.537	1504256	6.537	1152512	6.55
8.33_87.1	0	NA	0	NA	0	NA
SC_84
5.9_45.1	8388096		8388096	5.878	8388096	5.884
6.13_74.1	87224	6.071	68192	6.074	51376	6.08
6.27_60.05	0	NA	0	NA	0	NA
6.67_70.1	1448448	6.543	1225728	6.537	1231872	6.553
8.33_87.1	0	NA	0	NA	0	NA
SC_96
5.9_45.1	6624256	6.08	8388096	5.874	5929984	5.878
6.13_74.1	53444	6.27	49976	6.071	19136	6.074
6.27_60.05	0	NA	0	NA	0	NA
6.67_70.1	873152	6.711	1017792	6.527	686016	6.537
8.33_87.1	0	NA	0	NA	0	NA
AM_24
5.9_45.1	69488	5.884	200832	5.868	174464	5.874
6.13_74.1	0	NA	0	NA	0	NA
6.27_60.05	0	NA	0	NA	0	NA
6.67_70.1	11268	6.547	10515	6.508	8058	6.501
8.33_87.1	0	NA	0	NA	0	NA
AM_36
5.9_45.1	141540	5.875	70808	5.881	128288	5.881
6.13_74.1	0	NA	0	NA	0	NA
6.27_60.05	0	NA	0	NA	0	NA
6.67_70.1	2593	6.524	3342	6.543	1781	6.527
8.33_87.1	0	NA	0	NA	0	NA
AM_48
5.9_45.1	59152	5.881	73480	5.881	83880	5.874
6.13_74.1	0	NA	0	NA	0	NA
6.27_60.05	0	NA	0	NA	0	NA
6.67_70.1	1289	6.543	1250	6.527	894	6.53
8.33_87.1	0	NA	0	NA	0	NA
AM_60
5.9_45.1	72800	5.875	82592	5.881	62480	5.881
6.13_74.1	0	NA	0	NA	0	NA
6.27_60.05	0	NA	0	NA	0	NA
6.67_70.1	0	NA	0	NA	0	NA
8.33_87.1	0	NA	0	NA	0	NA
AM_72
5.9_45.1	53288	5.871	47904	5.878	51848	5.871
6.13_74.1	0	NA	0	NA	0	NA
6.27_60.05	0	NA	0	NA	0	NA
6.67_70.1	0	NA	0	NA	0	NA
8.33_87.1	0	NA	0	NA	0	NA
AM_84
5.9_45.1	31632	5.887	27976	5.887	35480	5.884
6.13_74.1	0	NA	0	NA	0	NA
6.27_60.05	0	NA	0	NA	0	NA
6.67_70.1	0	NA	0	NA	0	NA
8.33_87.1	0	NA	0	NA	0	NA
AM_96
5.9_45.1	15576	5.881	15809	5.871	5017	5.875
6.13_74.1	0	NA	0	NA	0	NA
6.27_60.05	0	NA	0	NA	0	NA
6.67_70.1	0	NA	0	NA	0	NA
8.33_87.1	0	NA	0	NA	0	NA
SCAM_24
5.9_45.1	791552		453760	5.871	327232	5.875
6.13_74.1	0	NA	0	NA	0	NA
6.27_60.05	0	NA	8630	6.035	10994	6.045
6.67_70.1	18392	6.524	19744	6.485	15818
8.33_87.1	0	NA	0	NA	0	NA
SCAM_36
5.9_45.1	4405248	5.875	3941376	6.138	2341376	5.897
6.13_74.1	34000	6.074	24208	6.328	16784	6.103
6.27_60.05	22664	6.061	66264	6.347	87672	6.125
6.67_70.1	607104	6.534	353408	6.759	206848	6.563
8.33_87.1	0	NA	0	NA	0	NA
SCAM_48
5.9_45.1	5971456		5497856	5.919	8332288	5.936
6.13_74.1	51352	6.129	21840	6.128	44504	6.151
6.27_60.05	508672	6.219	580672	6.222	832320	6.254
6.67_70.1	1601024	6.624	1294336	6.614	1539584	6.659
8.33_87.1	0	NA	0	NA	0	NA
SCAM_60
5.9_45.1	2307072	5.923	3150848		3264512	5.923
6.13_74.1	15785	6.135	15928	6.135	21568	6.141
6.27_60.05	1477632	6.254	2993152	6.276	2939392	6.283
6.67_70.1	993088	6.621	1136640	6.62	1223168	6.627
8.33_87.1	1697	8.196	925	8.19	1038	8.196
SCAM_72
5.9_45.1	1498624	5.916	1245696	5.913	875072	5.916
6.13_74.1	12299	6.138	9641	6.141	10851	6.138
6.27_60.05	3083264	6.28	4144128	6.292	3516928	6.286
6.67_70.1	816896	6.617	781888	6.614	917056	6.617
8.33_87.1	10592	8.206	10908	8.212	9332	8.186
SCAM_84
5.9_45.1	1140224	5.913	1385984	5.907	883584	5.91
6.13_74.1	7772	6.138	6321	6.199	9826	6.129
6.27_60.05	4140032	6.296	4914688	6.293	4279808	6.286
6.67_70.1	475456	6.614	493440	6.598	577344	6.604
8.33_87.1	16056	8.215	16800	8.183	16336	8.18
SCAM_96
5.9_45.1	2015232	5.907	1276928	5.919	1123840	5.913
6.13_74.1	6511	6.113	4548	6.132	5687	6.132
6.27_60.05	3710976	6.267	3107328	6.276	3277824	6.273
6.67_70.1	412288	6.582	143936	6.591	154944	6.592
8.33_87.1	6885	8.177	8329	8.196	10010	8.17
SCAM_144
5.9_45.1	362048	5.926	548608	5.926	453120	5.926
6.13_74.1	2081	6.151	1616	6.132	2770	6.148
6.27_60.05	4054016	6.309	3748864	6.299	3975680	6.302
6.67_70.1	29240	6.614	33244	6.604	39216	6.608
8.33_87.1	0	NA	0	NA	0	NA
SCAM_156
5.9_45.1	193472	5.939	182912	5.926	225984	5.929
6.13_74.1	1439	6.164	1482	6.164	1607	6.141
6.27_60.05	4951040	6.331	5876224	6.331	3629568	6.299
6.67_70.1	11603	6.627	17672	6.62	14301	6.608
8.33_87.1	0	NA	0	NA	0	NA
STANDARDS_INJECTED
AA_5MM	2258944	6.308
AA_500UM	60720	6.103	37.2026
AA_50UM	1615	6.048	37.5975
ETOH_5mM	2021888	5.942
ETOH_500uM	134848	5.89	14.9938
ETOH_50uM	24464	5.878	5.5121
IAA_5mM	3362304	6.736
IAA_500uM	599104		5.61222
IAA_50uM	29608	6.508	20.2345
IB_5mM	447424	6.164
IB_500uM	41536	6.093	10.772
IB_50uM	2834	6.074	14.6563
IPA_5mM	1008512	8.453
IPA_500uM	41504		24.2992
IPA_50uM	1605	8.106	25.8592
STANDARDS_VOLATILE
AA_3p	4675072	6.379	2568192	6.566	5418496	6.367	4.22059e+06
ETOH_3p	4055040	5.965	551232	6.187	4035584	5.945	2.88062e+06
IB_0.03p	573504	6.193	247936	6.187	684544	6.17	501995
IAA_0.03p	4594176	6.878	3860992	7.026	4840960	6.855	4.43204e+06
IPA_0.03p	1949184	8.823	1936896	8.852	2014208	8.752	1.96676e+06
AA_0.3p	72424		101152	6.106	98160	6.103	90578.7
ETOH_0.3p	265792	6.026	415168	5.9	391872	5.897	357611
IB_0.003p	87520	6.218	127896	6.106	123568	6.103	112995
IAA_0.003p	1209856	6.659	1550336	6.601	1275392	6.591	1.34519e+06
IPA_0.003p	551616	8.199	421056	8.273	401152	8.273	457941
AA_0.03p	3754	6.219	3370	6.048	2771	6.058	3298.33
ETOH_0.03p	105824	6.048	176384	5.875	97112	5.884	126440
IB_0.0003p	11358	6.238	10228	6.071	7296	6.077	9627.33
IAA_0.0003p	62560	6.65	71176	6.511	61904	6.511	65213.3
IPA_0.0003p	13297	8.177	10304	8.103	14608	8.1	12736.3
#4 (mimic)
AA_3.06p	4414464	6.353	5456384	6.318	6161408	6.315	5.34409e+06
ETOH_1.61p	1992192	5.964	2874368	5.92	3380224	5.923	2748928
IB_0.0022p	6689	6.183	9553	6.148	9936	6.135	8726
IAA_0.014p	730240	6.675	833152	6.624	1280000	6.62	947797
IPA_0.00046p	1013	8.273	1920	8.18	1845	8.199	1592.67

## Sheet: Linear_regression_96h_quantify
	Acetic acid	ethanol	isobutanol	isoamyl alcohol	isoamyl acetate
6_16	y=2.488e+006*X-344526	y=863224*X+19449	y=5.224e+006*X+6380	y=1.386e+008*X-109155	y=4.546e+007*X-13906
6_26	y=1.464e+006*X-187355	y=930217*X+89015	y=1.570e+007*X+33957	y=1.338e+0008*X+462602	y=6.177e+007*X+126782
6_26_force to go through 0			Y=1.694e7X	Y=1.507e8X	Y=6.642e7X
6_16	Rep 1	Rep 2	Rep 3	Mean	Concentration	Fold-change to mixed (in reality just Sc)
SCAM 96
ethanol	829312	800576	415296	681728	0.767216	12.6301
isobutanol	16336	12948	5065	11449.7	0.000971	24.7168
acetic acid	8275968	7177216	4910592	6.78793e+06	2.87	unique
isoamyl alcohol	255040	325120	97768	225976	0.0024	6.41667
isoamyl acetate	12444	9367	3414	8408.33	0.00049	unique
AJM 96
ethanol	28760	27776	35568	30701.3	0.00013
isobutanol	0	0	0		ND
acetic acid	0	0	0		ND
isoamyl alcohol	0	0	0		ND
isoamyl acetate	0	0	0		ND
Sc_96
ethanol	8388096	8388096	8388096	8388096	9.69
isobutanol	113288	155392	124024	130901	0.024
acetic acid					ND
isoamyl alcohol	2072576	2060800	1952768	2.02871e+06	0.0154
isoamyl acetate					ND
Am_96
ethanol	0	0	0		ND
isobutanol	0	0	0		ND
acetic acid	0	0	0		ND
isoamyl alcohol	0	0	0		ND
isoamyl acetate	0	0	0		ND
6_26	Rep 1	Rep 2	Rep 3	Mean	Concentration	Fold-change to mixed (in reality just Sc)
SCAM 96
ethanol	2015232	1276928	1123840	1472000	1.487	4.98319
isobutanol	6511	4548	5687	5582	0.00033	7.27273
acetic acid	3710976	3107328	3277824	3365376	2.43	unique
isoamyl alcohol	412288	143936	154944	237056	0.00157	3.63057
isoamyl acetate	6885	8329	10010	8408	0.00013	unique
AJM 96
ethanol	25184	47288	20048	30840	ND
isobutanol	0	0	0		ND
acetic acid	0	0	0		ND
isoamyl alcohol	0	3981	0		ND
isoamyl acetate	0	0	0		ND
Sc_96
ethanol	6624256	8388096	5929984	6.98078e+06	7.41
isobutanol	53444	49976	19136	40852	0.0024
acetic acid	0	0	0		ND
isoamyl alcohol	873152	1017792	686016	858987	0.0057
isoamyl acetate	0	0	0		ND
Am_96
ethanol	15576	15809	5017	12134	ND
isobutanol	0	0	0		ND
acetic acid	0	0	0		ND
isoamyl alcohol	0	0	0		ND
isoamyl acetate	0	0	0		ND
