# Supplementary material for: Metabolite exchange between microbiome members produces compounds that influence Drosophila behavior
Source: eLife. 2017 Jan 9;6:e18855. doi: 10.7554/eLife.18855 (PMC5222558; doi:10.7554/eLife.18855)
Supplement: Table 2—source data 3. — DOI: http://dx.doi.org/10.7554/eLife.18855.032 [file elife-18855-table2-data3.xlsx]

## Sheet: 1_20SCAM
Peak #	RT (approx)	Sc_Area	Sc_NormArea	Am_Area	Am_NormArea	ScAm_Area	ScAm_NormArea
1	1.28	227.368	0.103236	458.732	0.11652	120.38	0.0629376
2	1.35	323.475	0.146874	13.007	0.00330385	675.861	0.353356
3	1.4	10950.4	4.97203	14.017	0.00356039	8163.4	4.26802
4	1.57	10.904	0.00495096	39.337	0.00999181	121.11	0.0633192
5	1.78-2.10	0	0	0	0	COELUTE	#VALUE!
6	1.81	9.057	0.00411233	0	0	COLEUTE	#VALUE!
7	1.95	35.219	0.0159912	0	0	COELUTE	#VALUE!
8	2.04	2141.19	0.972206	0	0	COELUTE	#VALUE!
9	2.92	16.946	0.00769432	0	0	62.63	0.0327445
10	2.99	0	0	0	0	74.443	0.0389206
11	3.22	0	0	0	0	192.946	0.100877
12	3.26	274.013	0.124415	0	0	0	0
13	3.42	28757	13.0571	0	0	6832.61	3.57225
14	3.5	9585.65	4.35236	53.149	0.0135001	6832.61	3.57225
15	3.94	28.457	0.0129209	370.297	0.0940574	0	0
16	4.3	0	0	0	0	4423	2.31245
17	7.77	0	0	318.161	0.0808146	0	0
18	8.61	61.857	0.0280861	0	0	15022.7	7.85424
19	8.71	0	0	0	0	15022.7	7.85424
20	23.41	19275.9	8.7522	0	0	13796.1	7.21295
21	24.76	22.22	0.010089	0	0	372.241	0.194617
22	24.85	0	0	0	0	76.462	0.0399762
23	25.19	540.324	0.245334	0	0	192.663	0.100729
24	25.82	115.66	0.0525154	0	0	5174.35	2.70528
25	26.96	114.419	0.0519519	0	0	56.271	0.0294198
26	28.11	0	0	0	0	44.314	0.0231684
INTERNAL	18.15	2202.4	1	3936.93	1	1912.69	1

## Sheet: 1_30SCAM
Peak	RT (~)	AM	RT	Area	Rel Area		Sc	RT	Area	Rel Area	ScAm	RT	Area	Rel Area
1	1.25		1.283	760.409	0.198116			1.283	160.929	0.094233		1.279	147.33	0.0726696
2	1.32		1.347	26.618	0.00693501			1.347	1196.26	0.700479		1.343	91.195	0.0449813
3	1.42		1.423	25.632	0.00667811			1.407	14232.6	8.334		1.411	4801.1	2.36811
4	1.58		1.567	60.6	0.0157886			1.567	12.932	0.00757242		1.567	109.161	0.053843
5	1.8		NA	0	0			NA	0	0		1.919	15864.5	COELUTE
6	1.82		NA	0	0			1.823	839.053	0.491313		1.927	14376.8	COELUTE
7	1.95		NA	0	0			1.947	53.616	0.0313952		2.035	16904.6	COELUTE
8	2.05		NA	0	0			2.039	3280.64	1.921		2.159	39727.3	COELUTE
9	2.95		NA	0	0			2.92	133.344	0.0780805		2.932	35.143	0.0173341
10	3		NA	0	0			NA	0	0		2.984	34.29	0.0169133
11	3.2		NA	0	0			NA	0	0		3.22	88.423	0.0436141
12	3.22		NA	0	0			3.26	790.678	0.462987		NA	0	0
13	3.42		NA	0	0			3.432	32924	19.2788		3.384	4181.73	2.06261
14	3.5		3.508	33.931	0.00884032			3.496	10518.8	6.15932		3.46	5321.4	2.62475
15	3.75		3.844	419.235	0.109227			3.888	15.586	0.00912648		3.788	213.809	0.10546
16	4.3		NA	0	0			NA	0	0		4.292	3391.98	1.67307
17	7.5		7.122	1194.22	0.311141			NA	0	0		7.446	1030.69	0.508382
18	8.6		NA	0	0			NA	0	0		8.587	9891.7	4.87902
19	8.7		NA	0	0			8.655	57.176	0.0334798		8.687	7331.45	3.61619
20	23.2		NA	0	0			23.419	33714.2	19.7416		23.364	8274.15	4.08117
21	24.75		NA	0	0			24.756	168.702	0.0987846		24.748	258.871	0.127686
22	24.85		NA	0	0			24.852	50.516	0.02958		24.844	76.738	0.0378505
23	25.25		NA	0	0			25.188	270.724	0.158524		25.189	67.989	0.0335351
24	25.85		NA	0	0			25.833	250.434	0.146643		25.813	5182.92	2.55644
25	27		NA	0	0			26.97	43.772	0.025631		26.845	24.854	0.0122591
26	28.1		28.066	76.145	0.0198387			28.114	22.737	0.0133138		NA	0	0
INTERNAL			18.128	3838.21	1			18.128	1707.78	1		18.084	2027.4	1

## Sheet: 1_30SCAP
	ADH_Co			WT_Co			ADH_Co_1.5acetald			ADH_Co_1.5acetald_3%aa			ADH_CO_3%aa
Peak	RT	AREA	NormalizedArea				RT	AREA	Rel Area			Rel Area			Rel area
1_1.25	1.283	392.764	0.21457	1.287	221.367	0.0859804	1.279	248.332	0.207462	1.283	139.041	0.10301	1.287	246.434	0.132173
2_1.32	1.351	15.431	0.00843008	NA	0	0	1.335	11134.7	9.30218	1.347	7802.75	5.78073	1.351	48.938	0.0262476
3_1.41	1.427	10586.6	5.78356	1.427	14.143	0.00549323	1.407	18327.6	15.3113	1.415	15110.3	11.1946	1.411	16974.4	9.1041
4_1.58	NA	0	0	1.575	83.792	0.0325454	NA	0	0	1.579	15.368	0.0113855	1.579	15.294	0.00820284
5_1.8	NA	NA	NA	NA	NA	NA	NA	NA	NA	NA	NA	NA	NA	NA	NA
6_1.82	NA	NA	NA	NA	NA	NA	NA	NA	NA	NA	NA	NA	NA	NA	NA
7_1.95	1.939	815.582	0.445559	NA	NA	NA	1.931	258.179	0.215689	NA	NA	#VALUE!	NA	NA	NA
8_2.05	2.039	1678.8	0.917141	NA	NA	NA	2.031	311.804	0.260488	NA	NA	#VALUE!	NA	NA	NA
9_2.95	NA	0	0	2.916	396.082	0.153841	2.92	61.247	0.0511671	NA	0	0	2.976	15.744	0.00844419
10_3.0	NA	0	0	NA	0	0	NA	0	0	3.004	67.376	0.049916	3.004	144.491	0.0774968
11_3.2	NA	0	0	3.244	147.628	0.0573397	3.232	7141.51	5.96618	3.26	9286.4	6.8799	NA	0	0
12_3.25	3.292	61.258	0.0334657	NA	0	0	NA	0	0	NA	0	0	NA	0	0
13_3.42	3.428	24983.9	13.6489	3.412	9308.95	3.61566	3.392	10905.8	9.11099	3.42	12807.6	9.48858	3.432	20280.4	10.8772
14_3.5	3.488	8481.15	4.63332	3.488	4265.73	1.65684	3.468	2719.87	2.27224	3.496	3042.43	2.25401	3.496	7117.75	3.81756
15_3.75	3.924	401.631	0.219414	3.816	112.529	0.043707	3.908	31.148	0.0260217	3.805	103.468	0.0766551	3.809	332.377	0.178268
16_4.3	NA	0	0	4.324	3351.31	1.30167	NA	0	0	NA	0	0	4.337	34.561	0.0185366
17_7.5	7.494	105.938	0.0578748	7.586	21.228	0.00824509	NA	0	0	NA	0	0	7.495	26.696	0.0143182
18_8.6	8.635	310.862	0.169826	8.643	16270.7	6.31966	8.611	68.526	0.0572482	8.64	180.011	0.133363	8.639	456.544	0.244864
19_8.7	NA	0	0	8.735	3808.34	1.47918	NA	0	0	NA	0	0	8.739	63.815	0.0342268
20_23.2	23.396	20073.5	10.9663	23.379	6929.09	2.6913	23.363	9066.59	7.57443	23.384	9135.93	6.76842	23.388	13091.4	7.02147
21_24.75	NA	0	0	24.759	307.839	0.119567	24.752	263.379	0.220033	24.757	1874.91	1.38904	24.761	80.711	0.0432888
22_24.85	NA	0	0	24.856	128.131	0.0497669	24.848	45.851	0.038305	24.853	216.732	0.160568	NA	0	0
23_25.25	25.193	121.175	0.0661988	25.196	38.152	0.0148185	25.188	191.653	0.160111	25.193	79.979	0.0592531	25.193	204.257	0.109552
24_25.85	25.761	37.42	0.0204428	25.82	2316.89	0.899893	25.757	25.561	0.0213542	25.761	27.674	0.0205025	25.761	29.376	0.0157556
25_27.0	NA	0	0	26.985	11.006	0.0042748	26.957	30.352	0.0253567	26.854	49.68	0.0368058	26.854	66.544	0.0356904
26_28.1	28.127	30.922	0.0168929	NA	0	0	28.07	11.785	0.00984546	NA	0	0	28.107	10.15	0.00544389
INTERNAL	18.125	1830.47		18.136	2574.62		18.088	1197		18.133	1349.79		18.137	1864.48

## Sheet: 2_6SCAP
Peak	adh_co1	area	rel area	adh_co2	area	rel area	WT_co1	area	rel area	wt_co2	area	rel area	mm1	Area	Rel Area	mm2	Area	Rel Area	mm3	Area	Rel Area	50pAJM	Area	Rel Area
1	1.283	218.355	0.152493	1.283	249.701	0.168457	1.279	100.225	0.0859883	1.287	134.66	0.0880513	1.287	113.57	0.105545	1.287	161.891	0.118818	1.287	161.071	0.104663	1.279	141.919	0.0677138
2	1.351	18.884	0.013188	1.347	21.916	0.0147853	1.343	180.759	0.155083	1.347	3403.46	2.22545	1.311	155.641	0.144643	1.347	122.919	0.0902151	1.347	160.352	0.104196	1.343	30.418	0.0145133
3	1.419	18349.4	12.8147	1.403	16790	11.3271	1.411	15431	13.2391	1.419	13828.7	9.04231	1.415	10100.5	9.38678	1.415	11084.9	8.13563	1.415	9591.61	6.2326	1.411	205.343	0.0979753
4	1.567	10.345	0.00722464	1.571	14.423	0.00973029	1.559	11.406	0.00978581	1.571	12.779	0.00835592	1.575	79.613	0.0739873	1.575	404.394	0.296801	1.575	54.925	0.0356901			0
5	NA	NA	#VALUE!	NA	NA	#VALUE!	NA	NA	#VALUE!	NA	NA	#VALUE!	1.931	9097.45	8.45459	1.939	25380.7	18.6279	1.927	10506.9	6.82735			0
6	NA	NA	#VALUE!	NA	NA	#VALUE!	NA	NA	#VALUE!	NA	NA	#VALUE!	1.943	10282.6	9.55604	2.099	33362.8	24.4863	1.943	10245.5	6.65747			0
7	1.943	169.048	0.118058	1.943	96.005	0.0647685	NA	NA	#VALUE!	NA	NA	#VALUE!	2.111	28625.5	26.6028			0	1.955	9296.89	6.04108			0
8	2.039	1592.07	1.11185	2.039	1455.6	0.982001	NA	NA	#VALUE!	NA	NA	#VALUE!			0			0	2.063	19828.5	12.8845			0
9	2.923	37.119	0.0259228	NA	0	0	2.904	213.236	0.182946	2.928	79.924	0.0522606			0	2.932	54.611	0.0400812	2.936	43.027	0.0279588			0
10	NA	0	0	NA	0	0	2.972	29.303	0.0251406	3	36.961	0.024168	3	148.617	0.138115	3	156.314	0.114725	3	153.417	0.0996898			0
11	NA	0	0	NA	0	0	3.212	165.065	0.141618	3.248	1201.13	0.785394			0			0			0			0
12	3.296	60.766	0.0424371	3.292	66.217	0.0446724	NA	0	0	NA	0	0			0			0			0			0
13	3.428	26263	18.3413	3.424	24790.7	16.7247	3.4	23518.5	20.1778	3.424	18564.9	12.1392	3.404	2039.77	1.89563	3.404	3201	2.34934	3.4	3340.05	2.17036	3.396	12.097	0.00577184
14	3.488	7565.27	5.28335	3.484	7679.42	5.18082	3.46	5380.11	4.61588	3.488	6063.3	3.96467	3.48	1789.82	1.66335	3.48	2923.42	2.14561	3.476	2962.86	1.92525			0
15	3.904	180.172	0.125827	3.824	27.108	0.0182881	3.776	23.604	0.0202511	3.8	68.693	0.0449169			0			0			0			0
16	NA	0	0	NA	0	0	4.285	253.776	0.217728	4.325	520.54	0.34037	4.321	2321.88	2.15781	4.317	11255.2	8.26064	4.32	1066.33	0.692896			0
17	NA	0	0	NA	0	0	NA	0	0	NA	0	0			0			0			0			0
18	8.635	184.05	0.128535	8.635	82.813	0.0558687	8.563	5052.73	4.33501	8.623	6351.15	4.15288	8.635	16692.2	15.5127	8.643	4904.34	3.59949	8.655	47980.3	31.1774			0
19	8.727	54.658	0.0381715	NA	0	0	8.663	361.493	0.310144	8.727	655.693	0.428744	8.751	32464.5	30.1704	8.779	76672.9	56.2733	8.747	19012.9	12.3545			0
20	23.39	18656.6	13.0292	23.387	15602.1	10.5258	23.378	21620.3	18.5492	23.386	13225.8	8.64806	23.378	3404.79	3.1642	23.371	6233.6	4.57509	23.375	4884.81	3.17413			0
21	NA	0	0	NA	0	0	24.743	256.612	0.220161	24.751	1096.82	0.717185	24.759	32.278	0.0299971	24.76	27.022	0.0198325	24.756	30.876	0.0200631			0
22	NA	0	0	NA	0	0	24.839	73.067	0.0626881	24.851	184.575	0.12069	24.843	23.447	0.0217902	24.912	14.849	0.0108983	24.856	25.152	0.0163437			0
23	25.191	125.336	0.0875309	25.188	356.561	0.240549	25.183	75.319	0.0646202	25.191	85.171	0.0556915	25.2	13710.4	12.7416	25.188	25780.5	18.9213	25.184	17779.4	11.553			0
24	NA	0	0	NA	0	0	25.82	663.231	0.569021	25.832	221.772	0.145012	25.816	6050.22	5.6227	25.816	3150.45	2.31224	25.821	12619.5	8.20012			0
25	NA	0	0	26.961	53.956	0.0364007	26.968	41.938	0.0359808	NA	0	0	26.937	51352	47.7233	26.925	16568.1	12.16	26.933	20034.3	13.0182			0
26	NA	0	0	NA	0	0	28.065	34.522	0.0296183	NA	0	0	28.065	51953.8	48.2826	28.062	25626.4	18.8083	28.062	18976.3	12.3307	28.065	120.354	0.0574245
INTERNAL	18.124	1431.91		18.124	1482.28		18.067	1165.57		18.123	1529.34		18.12	1076.04		18.12	1362.51		18.125	1538.94		18.076	2095.86

## Sheet: RelArea_2_16
Peak#	RT_identification	COCULTURE RT	AREA	SCAM_REL_AREA	SC RT	SC AREA	SC_REL_AREA	AM RT	AM AREA	AM_REL_AREA
1	1.25_CO2	1.287	196.371	0.0450192	1.279	191.842	0.0559192	1.283	538.904	0.0867566
2	1.32_acetaldehyde	1.347	120.423	0.0276077	1.343	203.531	0.0593264	1.347	47.565	0.00765736
3	1.42_ethanol	1.415	11045	2.53213	1.383	2453.99	0.715303	1.423	15.13	0.00243574
4	1.58_methylacetate	1.575	100.282	0.0229903			0	1.571	11.568	0.0018623
5	1.8_acetic acid			0			0		1.495	0.000240676
6	1.82_2,3butanedione			0			0			0
7	1.95_ethylacetate			0			0			0
8	2.05_isobutanol			0			0			0
9	2.95_acetion	2.996	116.088	0.0266139	2.972	43.815	0.0127715			0
10	3.0_propylacetate	0	0	0
11	3.2_1,3dioxolane,2,4,5trimethyl	3.24	29.098	0.00667089
12	3.22_1,1diethoxyethane			0	3.236	76.033	0.0221626			0
13	3.42_isoamylalcohol	3.404	7078.26	1.62273	3.364	21734	6.33516			0
14	3.50_1methyl2butanol	3.48	3439.96	0.788632	3.452	8390.6	2.44574	3.504	15.898	0.00255937
15	3.75_?acid	3.752	53.455	0.0122549	3.948	58.612	0.0170846	3.924	165.967	0.0267186
16	4.3_isobutylacetate	4.316	1563.44	0.358428	0	0	0			0
17	7.5_?acid	7.594	45.044	0.0103266	3.38	15916.7	4.63951			0
18	8.6_isoamylacetate	8.618	6850.18	1.57044	0	0	0			0
19	8.7_1methyl2butylacetate	8.714	2269.29	0.520248	0	0	0			0
20	23.2_benzeneethanol	23.382	13813.1	3.16673	23.399	34876.7	10.1661			0
21	24.75_?	24.755	74.878	0.0171662	24.744	26.605	0.00775498			0
22	24.85_?	24.859	36.692	0.00841186	24.864	28.515	0.00831172			0
23	25.25_ethyloctanoate	25.183	261.298	0.0599041	25.172	953.947	0.278062			0
24	25.85_2-phenylethyl acetate	25.815	5728.95	1.3134	25.817	170.314	0.0496441			0
25	27.0_ethyldecanoate	27.024	90.358	0.0207151	27.037	22.574	0.00658			0
26	28.1_ethyldodecanoate	28.081	18.808	0.00431185	28.074	12.053	0.00351328			0
	INTERNAL STANDARD	18.111	4361.94	1	18.064	3430.7	1	18.104	6211.67	1

## Sheet: RelArea_2_17
Peak#	RT_identification	co_wt1		CoWT1_relArea	co_wt2		CoWT2_relArea	co_adh1		Coadh1_relArea	co_adh2		Coadh2_relArea	co_adh_aa		Coadh_aa_relArea	co_adh_acet		Coadh_acetald_relArea	co_adh_aa_acet		Coadh_aa_acetald_relArea
1	1.25_CO2	1.287	115.601	0.0375893	1.283	129.766	0.0388267	1.283	275.766	0.0894239	1.287	275.731	0.0838087	1.283	172.038	0.0515433	1.283	138.826	0.0466212	1.283	135.486	0.0457166
2	1.32_acetaldehyde	1.351	79.015	0.0256928	1.347	101.393	0.0303373	1.347	28.789	0.00933554	1.351	30.903	0.009393	1.351	44.113	0.0132164	1.347	12794	4.29655	1.331	2669.08	0.900618
3	1.42_ethanol	1.399	14460.1	4.70189	1.399	12120	3.62637	1.399	20954.4	6.79496	1.399	15200.9	4.62033	1.403	17248.1	5.1676	1.399	13134.6	4.41091	1.399	13401.8	4.52212
4	1.58_methylacetate			0	1.575	12.832	0.0038394			0			0			0			0			0
5	1.8_acetic acid			0			0			0			0			0			0			0
6	1.82_2,3butanedione			0			0			0			0			0			0			0
7	1.95_ethylacetate			0			0			0			0			0			0			0
8	2.05_isobutanol			0			0			0			0			0			0			0
9	2.95_acetion	2.968	129.447	0.0420915	2.952	111.474	0.0333536	2.944	19.013	0.00616543	2.924	36.744	0.0111684	2.956	33.101	0.00991719	2.912	87.153	0.0292681			0
10	3.0_propylacetate			0	2.992	47.311	0.0141557			0			0	2.992	967.598	0.289896			0	2.992	654.712	0.220917
11	3.2_1,3dioxolane,2,4,5trimethyl	3.236	76.824	0.0249804	3.232	93.418	0.0279512			0			0			0			0			0
12	3.22_1,1diethoxyethane			0			0	3.28	57.58	0.0186717	3.276	135.502	0.041186			0	3.248	4426.63	1.48657	3.248	7587.16	2.56011
13	3.42_isoamylalcohol	3.412	14820.8	4.81919	3.4	9547.15	2.85656	3.392	18845.6	6.11115	3.408	17901.4	5.44114	3.408	16717.4	5.00861	3.396	9876.2	3.31667	3.396	12451.5	4.20148
14	3.50_1methyl2butanol	3.48	4034.03	1.31172	3.476	3254.9	0.973885	3.472	5896.04	1.91194	3.472	5659.99	1.72036	3.476	4447.7	1.33255	3.472	2595.81	0.871736	3.48	3232.2	1.09063
15	3.75_?acid			0			0			0			0			0			0			0
16	4.3_isobutylacetate	4.324	101.533	0.0330149	4.316	175.782	0.0525949			0			0	4.325	18.747	0.00561667			0			0
17	7.5_?acid			0			0			0			0			0			0			0
18	8.6_isoamylacetate	8.619	1109.05	0.360622	8.615	2137.3	0.639492	8.623	55.226	0.0179084	8.631	74.987	0.0227924	8.631	67.797	0.0203122	8.635	34.146	0.0114671			0
19	8.7_1methyl2butylacetate	8.719	147.064	0.0478199	8.715	359.398	0.107534			0			0			0			0			0
20	23.2_benzeneethanol	23.387	16853.6	5.48018	23.375	8978.16	2.68631	23.383	18108.3	5.87206	23.39	20405.6	6.2023	23.391	18856.1	5.64935	23.371	9772.33	3.28179	23.376	11340.9	3.82671
21	24.75_?	24.748	348.914	0.113454	24.751	285.754	0.0854991			0			0			0	24.752	195.557	0.0656729	24.749	1243.04	0.419436
22	24.85_?	24.844	106.665	0.0346836	24.843	79.893	0.0239044			0			0			0	24.852	46.116	0.0154869	24.845	183.9	0.0620528
23	25.25_ethyloctanoate	25.188	141.311	0.0459492	25.18	412.517	0.123427	25.176	637.59	0.206754	25.183	627.932	0.190861	25.18	383.775	0.11498	25.18	640.444	0.215077	25.181	432.841	0.146052
24	25.85_2-phenylethyl acetate	25.824	361.962	0.117697	25.82	719.223	0.215195			0	25.864	13.123	0.00398875			0	25.864	12.604	0.00423273	25.865	13.235	0.00446584
25	27.0_ethyldecanoate	27.013	23.595	0.00767224			0	27.041	10.069	0.00326512	26.94	156.458	0.0475556	26.957	59.517	0.0178315	26.937	375.91	0.12624	26.942	149.109	0.0503134
26	28.1_ethyldodecanoate			0	28.105	118.556	0.0354726			0			0			0			0			0
	INTERNAL STANDARD	18.104	3075.37	1	18.104	3342.19	1	18.096	3083.81	1	18.104	3290	1	18.104	3337.74	1	18.104	2977.74	1	18.105	2963.61	1

## Sheet: RelArea_2_18
Peak#	RT_identification	SCAPWT	RT	Area	SCAPWT Rel Area	scam			SCAM Rel Area
1	1.25_CO2		1.283	108.389	0.0409105		1.283	156.491	0.0419621
2	1.32_acetaldehyde		1.343	70.362	0.0265575		1.347	135.737	0.036397
3	1.42_ethanol		1.403	12110.8	4.5711		1.415	3059.31	0.820336
4	1.58_methylacetate				0		1.571	68.073	0.0182534
5	1.8_acetic acid				0
6	1.82_2,3butanedione				0
7	1.95_ethylacetate				0
8	2.05_isobutanol				0
9	2.95_acetion		2.916	125.34	0.0473085		2.948	21.393	0.0057364
10	3.0_propylacetate		2.971	21.63	0.00816406		2.996	14.316	0.00383875
11	3.2_1,3dioxolane,2,4,5trimethyl		3.212	66.72	0.0251829		3.228	54.09	0.0145039
12	3.22_1,1diethoxyethane				0				0
13	3.42_isoamylalcohol		3.388	16606.5	6.268		3.392	3039.78	0.815099
14	3.50_1methyl2butanol		3.452	3287.73	1.24093		3.468	2924.64	0.784224
15	3.75_?acid				0				0
16	4.3_isobutylacetate		4.284	172.301	0.0650336		4.304	1088.98	0.292003
17	7.5_?acid				0				0
18	8.6_isoamylacetate		8.563	3000.36	1.13246		8.599	2890.61	0.775099
19	8.7_1methyl2butylacetate		8.667	226.316	0.0854211		8.699	2070.99	0.555322
20	23.2_benzeneethanol		23.375	24133.5	9.10898		23.367	12334.2	3.30734
21	24.75_?		24.748	219.582	0.0828794		24.747	213.436	0.0572315
22	24.85_?		24.844	60.377	0.0227888		24.844	60.028	0.0160961
23	25.25_ethyloctanoate		25.2	91.735	0.0346246		25.184	68.61	0.0183973
24	25.85_2-phenylethyl acetate		25.852	1689.21	0.637576		25.808	4425.96	1.18679
25	27.0_ethyldecanoate		26.941	27.781	0.0104857				0
26	28.1_ethyldodecanoate				0				0
	INTERNAL STANDARD		18.056	2649.42	1		18.088	3729.34	1

## Sheet: Quantify_2_17_metmixes
Ethyl Acetate	Concentration	linear regression eq	Force through 0,0	Rel Area SCAM_2_18	Est. conc sing exp (2_18)	Average Rel Area All (1_20, 1_30, 2_16_2_18)	Est_conc_All exp.		Ethyl Acetate	Concentration	linear regression eq	Force through 0,0	Rel Area SCAP_2_17	Estimated concentration SCAP_2_17	Avg Rel Area SCAP_All	Estimated concentration SCAP ALL
	4e-05									4e-05
	0.0002									0.0002
	0.001									0.001
Acetic acid	0.0192								Acetic acid	0.0192
	0.0288									0.0288
	0.0432									0.0432
Isobutyl acetate	2.889e-07	y=3252X - 0.07251		0.292003	0.000112089	1.15899	0.00037869		Isobutyl acetate	2.889e-07	y=3252X - 0.07251		0.0428049	3.54597e-05	0.335069	0.000125332
	8.6667e-07									8.6667e-07
	2.6e-06									2.6e-06
Isoamyl acetate	1.66667e-06	y=6826X+ 1.136	y=7800X - 0	0.775099	9.93717e-05	3.7697	0.000483295		Isoamyl acetate	1.66667e-06	y=6826X+ 1.136	y=7800X - 0	0.500057	6.41099e-05	2.82336	0.000361969
	5e-06									5e-06
	1.5e-05									1.5e-05
2-phenethyl acetate	2.889e-07	y=6972X -0.2013		1.18679	0.000200774	1.94048	0.000307197		2-phenethyl acetate	2.889e-07	y=6972X -0.2013		0.166446	5.27462e-05	0.430733	9.0653e-05
	8.6667e-07									8.6667e-07
	2.6e-06									2.6e-06
2-methylbutyl acetate	1.1111e-06	y=8087X-0.1307		0.555322	8.48302e-05	3.1365	0.000404006		2-methylbutyl acetate	1.1111e-06	y=8087X-0.1307		0.0776769	2.57669e-05	0.409808	6.68366e-05
	3.3333e-06									3.3333e-06
	1e-05									1e-05
methyl acetate	2.889e-07	y=56.30X + 0.009093	y=101.3X-0	0.0182534	0.000162706	0.0396015	0.000541891		methyl acetate	2.889e-07	y=56.30X + 0.009093	y=101.3X-0	0.0019197	1.89507e-05	0.00908775	8.97112e-05
	8.6667e-07									8.6667e-07
	2.6e-06									2.6e-06

## Sheet: Quantify_2_18_metmixes
Ethyl Acetate	Concentration	Rel Peak Area	lin reg equation	force through 0,0	Rel Area SCAM_2_18	est conc SCAM_2_18	Average Rel Area All	Average Concentration ALL	Ethyl Acetate	Concentration	Rel Peak Area	lin reg equation	force through 0,0	Rel Area SCAP_2_18	Estimated concentration SCAP_2_18	Avg Rel Area SCAP_All	Estimated concentration SCAP_ALL
	4e-05									4e-05
	0.0002									0.0002
	0.001									0.001
Acetic acid	0.0192								Acetic acid	0.0192
	0.0288									0.0288
	0.0432									0.0432
Isobutyl acetate	2.889e-07	0.0430495	y=4151*X - 0.1319		0.292003	0.000102121	1.15899	0.000310983	Isobutyl acetate	2.889e-07	0.0430495	y=4151*X - 0.1319		0.0650336	4.74424e-05	0.335069	0.000112496
	8.6667e-07	0.154509								8.6667e-07	0.154509
	2.6e-06	0.96564								2.6e-06	0.96564
Isoamyl acetate	1.66667e-06	1.17213	y=7576*X + 0.6798	Y = 8158*X - 0.0	0.775099	1.40187e-05	3.7697	0.000454531	Isoamyl acetate	1.66667e-06	1.17213	y=7576*X + 0.6798	Y = 8158*X - 0.0	1.13246	5.97494e-05	2.82336	0.00028294
	5e-06	5.49452								5e-06	5.49452
	1.5e-05	11.7864								1.5e-05	11.7864
2-phenethyl acetate	2.889e-07	0.151536	y=5129* X -0.04011		1.18679	0.000239209	1.94048	0.000386155	2-phenethyl acetate	2.889e-07	0.151536	y=5129* X -0.04011		0.637576	0.000132128	0.430733	9.18001e-05
	8.6667e-07	0.346494								8.6667e-07	0.346494
	2.6e-06	1.30799								2.6e-06	1.30799
2-methylbutyl acetate	1.1111e-06	1.02078	y=8995 *X - 0.05042		0.555322	6.73421e-05	3.1365	0.000354299	2-methylbutyl acetate	1.1111e-06	1.02078	y=8995 *X - 0.05042		0.0854211	1.51018e-05	0.409808	5.11648e-05
	3.3333e-06	2.85217								3.3333e-06	2.85217
	1e-05	8.96843								1e-05	8.96843
methyl acetate	2.889e-07	0.0089568	y=75.22*X +0.004457		0.0182534	0.000183413	0.0396015	0.000467222	methyl acetate	2.889e-07	0.0089568	y=75.22*X +0.004457		0	-5.92529e-05	0.00908775	6.15627e-05
	8.6667e-07	0.00787467								8.6667e-07	0.00787467
	2.6e-06	0.0247905								2.6e-06	0.0247905

## Sheet: Tmaze_calcs
	Estimate 2_17, single	Estimate 2_17, all	Estimate 2_18, single	Estimate 2_18, all	Concentration_AVERAGE	amount in 250ul	amount (ul) from 1e4 dilution	MISC
	SCAM	SCAM	SCAM	SCAM
Isobutyl acetate	0.000112089	0.00037869	0.000102121	0.000310983	0.00022597	0.000564926	5.64926
Isoamyl acetate	9.93717e-05	0.000483295	1.40187e-05	0.000454531	0.000262804	0.00065701	6.5701
2-phenethyl acetate	0.000200774	0.000307197	0.000239209	0.000386155	0.000283334	0.000708334	7.08334
2-methylbutyl acetate	8.48302e-05	0.000404006	6.73421e-05	0.000354299	0.000227619	0.000569049	5.69049
methyl acetate			0.000183413	0.000467222	0.000325318	0.000813294	8.13294
ethyl acetate (qualitative)					0.02	0.05	NA	5 ul of 1% solution
acetal (qualitative)					0.02	0.05	NA	5 ul of 1% solution
acetoin					0.4	1	NA
acetaldehyde
ethanol						8.03ul
acetic acid						7.5
	Estimate 2_17, single	Estimate 2_17, all	Estimate 2_18, single	Estimate 2_18, all	Concentration_AVERAGE
	SCAP	SCAP	SCAP	SCAP
Isobutyl acetate	3.54597e-05	0.000125332	4.74424e-05	0.000112496	8.01824e-05	0.000200456	2.00456
Isoamyl acetate	6.41099e-05	0.000361969	5.97494e-05	0.00028294	0.000192192	0.00048048	4.8048
2-phenethyl acetate	5.27462e-05	9.0653e-05	0.000132128	9.18001e-05	9.18319e-05	0.00022958	2.2958
2-methylbutyl acetate	2.57669e-05	6.68366e-05	1.51018e-05	5.11648e-05	3.97175e-05	9.92939e-05	0.992939
methyl acetate	1.89507e-05	8.97112e-05	0	6.15627e-05	4.25562e-05	0.00010639	1.0639
