# Supplementary material for: Metabolite exchange between microbiome members produces compounds that influence Drosophila behavior
Source: eLife. 2017 Jan 9;6:e18855. doi: 10.7554/eLife.18855 (PMC5222558; doi:10.7554/eLife.18855)
Supplement: Table 2—source data 4. — DOI: http://dx.doi.org/10.7554/eLife.18855.033 [file elife-18855-table2-data4.xlsx]

## Sheet: acetoin_88.05
2_18_16_mm1	extract mass 88.05	2_18_16_SCAPWT	extract mass 88.05	2_18_16_mm2	extract mass 88.05	2_18_16_mm3	extract mass 88.05	2_17_16_SCAPWT		2_18_16_SCAM		2_17_16_SCAPWT2		2_17_16_SCAPADH1		2_17_16_SCAPADH2		2_17_16_SCAPWTLP		2_17_16_SCAPADHLP		2_16_16_SCAMLP		2_16_16_SCAM		2_17_mm1		2_17mm2		2_17mm3		2_17ajm50p		2_16ajm		2_16am		2_16_Sc
2.844	0	2.843	0	2.844	1	2.843	0	2.844	0	2.844	0	2.844	0	2.844	0	2.844	0	2.843	0	2.844	0	2.84	0	2.839	0	2.848	0	2.848	2	2.848	0	2.848	0	2.848	0	2.848	0	2.848	0
2.848	0	2.847	0	2.848	1	2.847	0	2.848	0	2.848	0	2.848	0	2.848	0	2.848	0	2.847	1	2.848	0	2.844	0	2.844	0	2.852	0	2.852	1	2.852	0	2.852	0	2.852	0	2.852	0	2.852	0
2.852	0	2.851	0	2.852	1	2.851	0	2.852	0	2.852	0	2.852	0	2.852	0	2.852	0	2.851	1	2.852	0	2.848	0	2.848	0	2.856	0	2.856	1	2.856	0	2.856	0	2.856	0	2.856	0	2.856	0
2.856	0	2.855	0	2.856	1	2.855	0	2.856	0	2.856	0	2.856	0	2.856	0	2.856	0	2.855	1	2.856	0	2.852	0	2.852	0	2.86	0	2.86	0	2.86	0	2.86	0	2.86	0	2.86	0	2.86	0
2.86	0	2.859	0	2.86	1	2.859	0	2.86	0	2.86	0	2.86	0	2.86	0	2.86	0	2.859	1	2.86	0	2.856	0	2.855	0	2.864	0	2.864	0	2.864	0	2.864	0	2.864	0	2.864	0	2.864	0
2.864	0	2.864	0	2.864	1	2.863	0	2.864	0	2.864	0	2.864	0	2.864	0	2.864	0	2.863	1	2.864	0	2.86	0	2.859	0	2.868	0	2.868	0	2.868	0	2.868	0	2.868	0	2.868	0	2.868	0
2.868	0	2.867	0	2.868	0	2.867	0	2.868	0	2.868	0	2.868	0	2.868	0	2.868	0	2.867	0	2.868	0	2.864	0	2.863	0	2.872	0	2.872	0	2.872	0	2.872	0	2.872	0	2.872	0	2.872	0
2.872	0	2.871	0	2.872	0	2.871	0	2.872	0	2.872	0	2.872	0	2.872	0	2.872	0	2.871	0	2.872	0	2.868	0	2.868	0	2.876	0	2.876	0	2.876	0	2.876	0	2.876	0	2.876	0	2.876	0
2.876	0	2.875	0	2.876	0	2.875	1	2.876	0	2.876	0	2.876	0	2.876	0	2.876	0	2.875	0	2.876	0	2.872	0	2.872	1	2.88	0	2.88	0	2.88	0	2.88	0	2.88	0	2.88	0	2.88	0
2.88	0	2.879	2	2.88	0	2.879	4	2.88	0	2.88	0	2.88	0	2.88	0	2.88	0	2.879	2	2.88	0	2.876	0	2.876	1	2.884	0	2.884	0	2.884	0	2.884	0	2.884	0	2.884	0	2.884	0
2.884	0	2.883	10	2.884	0	2.883	13	2.884	0	2.884	0	2.884	0	2.884	0	2.884	0	2.883	28	2.884	0	2.88	0	2.88	1	2.888	0	2.888	0	2.888	0	2.888	0	2.888	0	2.888	0	2.888	0
2.888	0	2.888	28	2.888	0	2.887	24	2.888	0	2.888	0	2.888	0	2.888	0	2.888	0	2.887	84	2.888	13	2.884	0	2.884	0	2.892	0	2.892	1	2.892	0	2.892	0	2.892	0	2.892	0	2.892	0
2.892	0	2.892	56	2.892	0	2.891	35	2.892	0	2.892	0	2.892	0	2.892	0	2.892	0	2.891	174	2.892	62	2.888	0	2.888	0	2.896	0	2.896	1	2.896	4	2.896	0	2.896	0	2.896	0	2.896	2
2.896	0	2.896	104	2.896	0	2.895	49	2.896	0	2.896	0	2.896	0	2.896	0	2.896	0	2.895	319	2.896	134	2.892	6	2.892	0	2.9	0	2.9	2	2.9	13	2.9	0	2.9	0	2.9	0	2.9	5
2.9	0	2.899	171	2.9	0	2.899	63	2.9	0	2.9	0	2.9	3	2.9	0	2.9	6	2.899	561	2.9	242	2.896	27	2.896	0	2.904	0	2.904	2	2.904	24	2.904	0	2.904	0	2.904	0	2.904	10
2.904	0	2.903	240	2.904	0	2.903	77	2.904	0	2.904	0	2.904	7	2.904	0	2.904	17	2.903	1143	2.904	386	2.9	58	2.9	0	2.908	0	2.908	2	2.908	39	2.908	0	2.908	0	2.908	0	2.908	13
2.908	0	2.907	300	2.908	2	2.907	89	2.908	3	2.908	0	2.908	14	2.908	0	2.908	26	2.907	1848	2.908	622	2.904	88	2.904	0	2.912	0	2.912	3	2.912	56	2.912	0	2.912	0	2.912	0	2.912	16
2.912	0	2.911	350	2.912	6	2.911	98	2.912	6	2.912	0	2.912	22	2.912	0	2.912	37	2.911	2609	2.912	961	2.908	130	2.908	0	2.916	2	2.916	7	2.916	86	2.916	0	2.916	0	2.916	0	2.916	20
2.916	0	2.916	385	2.916	12	2.915	106	2.916	10	2.916	0	2.916	29	2.916	0	2.916	47	2.915	3337	2.916	1557	2.912	170	2.912	0	2.92	8	2.92	11	2.92	130	2.92	0	2.92	0	2.92	0	2.92	22
2.92	0	2.92	398	2.92	20	2.919	118	2.92	15	2.92	0	2.92	40	2.92	5	2.92	54	2.919	3840	2.92	2210	2.916	211	2.916	0	2.924	18	2.924	16	2.924	183	2.924	0	2.924	0	2.924	0	2.924	26
2.924	1	2.924	381	2.924	34	2.923	131	2.924	21	2.924	1	2.924	56	2.924	10	2.924	60	2.924	4018	2.924	2828	2.92	254	2.92	0	2.928	31	2.928	22	2.928	240	2.928	0	2.928	0	2.928	0	2.928	28
2.928	4	2.928	342	2.928	48	2.927	152	2.928	27	2.928	5	2.928	76	2.928	17	2.928	63	2.928	4012	2.928	3361	2.924	278	2.924	1	2.932	44	2.932	34	2.932	299	2.932	0	2.932	0	2.932	0	2.932	28
2.932	7	2.932	290	2.932	62	2.931	188	2.932	36	2.932	13	2.932	114	2.932	23	2.932	60	2.932	3612	2.932	3786	2.928	300	2.928	3	2.936	57	2.936	50	2.936	345	2.936	0	2.936	0	2.936	0	2.936	28
2.936	15	2.935	244	2.936	73	2.935	242	2.936	42	2.936	28	2.936	151	2.936	28	2.936	57	2.935	3033	2.936	3866	2.932	315	2.932	4	2.94	67	2.94	69	2.94	379	2.94	0	2.94	0	2.94	0	2.94	28
2.94	26	2.94	198	2.94	83	2.939	312	2.94	48	2.94	40	2.94	194	2.94	32	2.94	50	2.939	2345	2.94	3769	2.936	329	2.936	5	2.944	75	2.944	83	2.944	389	2.944	0	2.944	0	2.944	0	2.944	28
2.944	38	2.943	159	2.944	90	2.943	366	2.944	58	2.944	51	2.944	227	2.944	36	2.944	45	2.943	1638	2.944	3336	2.94	342	2.94	8	2.948	77	2.948	101	2.948	378	2.948	0	2.948	0	2.948	0	2.948	28
2.948	47	2.947	129	2.948	91	2.947	414	2.948	73	2.948	58	2.948	261	2.948	36	2.948	41	2.947	1107	2.948	2775	2.944	354	2.944	11	2.952	74	2.952	120	2.952	349	2.952	0	2.952	0	2.952	0	2.952	25
2.952	56	2.951	105	2.952	83	2.951	445	2.952	95	2.952	64	2.952	275	2.952	34	2.952	38	2.951	836	2.952	2188	2.948	359	2.948	14	2.956	67	2.956	135	2.956	309	2.956	0	2.956	0	2.956	0	2.956	22
2.956	63	2.956	85	2.956	79	2.955	458	2.956	123	2.956	68	2.956	280	2.956	31	2.956	31	2.955	645	2.956	1628	2.952	370	2.952	17	2.96	60	2.96	140	2.96	258	2.96	0	2.96	0	2.96	0	2.96	20
2.96	69	2.96	74	2.96	70	2.959	445	2.96	150	2.96	66	2.96	260	2.96	28	2.96	25	2.96	499	2.96	1125	2.956	384	2.956	23	2.964	52	2.964	140	2.964	213	2.964	0	2.964	0	2.964	0	2.964	20
2.964	69	2.964	66	2.964	63	2.963	409	2.964	176	2.964	58	2.964	234	2.964	25	2.964	22	2.964	402	2.964	860	2.96	405	2.96	31	2.968	47	2.968	134	2.968	178	2.968	0	2.968	0	2.968	0	2.968	17
2.968	64	2.968	60	2.968	53	2.967	347	2.968	197	2.968	51	2.968	200	2.968	25	2.968	20	2.968	327	2.968	664	2.964	417	2.964	40	2.972	41	2.972	128	2.972	152	2.972	0	2.972	0	2.972	0	2.972	14
2.972	60	2.971	50	2.972	44	2.971	295	2.972	210	2.972	46	2.972	174	2.972	23	2.972	18	2.971	274	2.972	529	2.968	434	2.968	50	2.976	35	2.976	115	2.976	129	2.976	0	2.976	0	2.976	0	2.976	12
2.976	57	2.976	43	2.976	40	2.975	240	2.976	214	2.976	42	2.976	141	2.976	19	2.976	15	2.976	234	2.976	423	2.972	464	2.972	58	2.98	30	2.98	97	2.98	109	2.98	0	2.98	0	2.98	0	2.98	11
2.98	50	2.979	38	2.98	35	2.979	194	2.98	203	2.98	39	2.98	119	2.98	16	2.98	15	2.979	198	2.98	352	2.976	493	2.976	65	2.984	26	2.984	82	2.984	92	2.984	0	2.984	0	2.984	0	2.984	9
2.984	43	2.983	33	2.984	28	2.983	159	2.984	183	2.984	33	2.984	99	2.984	15	2.984	13	2.983	168	2.984	298	2.98	524	2.98	67	2.988	21	2.988	70	2.988	80	2.988	0	2.988	0	2.988	0	2.988	8
2.988	38	2.987	32	2.988	24	2.987	130	2.988	162	2.988	29	2.988	85	2.988	13	2.988	12	2.987	146	2.988	256	2.984	566	2.984	66	2.992	17	2.992	58	2.992	70	2.992	0	2.992	0	2.992	0	2.992	7
2.992	34	2.992	27	2.992	20	2.991	105	2.992	139	2.992	25	2.992	75	2.992	12	2.992	11	2.992	129	2.992	227	2.988	662	2.988	64	2.996	13	2.996	47	2.996	58	2.996	0	2.996	0	2.996	0	2.996	8
2.996	28	2.996	23	2.996	17	2.995	86	2.996	117	2.996	21	2.996	66	2.996	11	2.996	9	2.996	114	2.996	201	2.992	843	2.992	59	3	11	3	39	3	48	3	0	3	0	3	0	3	8
3	24	3	23	3	16	2.999	75	3	98	3	19	3	56	3	9	3	9	3	100	3	179	2.996	1255	2.996	50	3.004	10	3.004	34	3.004	44	3.004	0	3.004	0	3.004	0	3.004	6
3.004	18	3.004	21	3.004	14	3.003	65	3.004	80	3.004	15	3.004	51	3.004	9	3.004	9	3.004	89	3.004	160	3	1749	3	43	3.008	8	3.008	32	3.008	39	3.008	0	3.008	0	3.008	0	3.008	6
3.008	16	3.008	20	3.008	14	3.007	59	3.008	71	3.008	13	3.008	45	3.008	10	3.008	7	3.007	83	3.008	144	3.004	2251	3.004	36	3.012	8	3.012	29	3.012	32	3.012	0	3.012	0	3.012	0	3.012	5
3.012	15	3.011	18	3.012	13	3.011	50	3.012	59	3.012	12	3.012	42	3.012	10	3.012	9	3.011	75	3.012	131	3.008	2688	3.008	33	3.016	6	3.016	27	3.016	29	3.016	0	3.016	0	3.016	0	3.016	4
3.016	11	3.015	15	3.016	12	3.015	43	3.016	49	3.016	11	3.016	37	3.016	8	3.016	9	3.015	69	3.016	120	3.012	2886	3.012	29	3.02	6	3.02	24	3.02	25	3.02	0	3.02	0	3.02	0	3.02	3
3.02	8	3.019	13	3.02	12	3.019	40	3.02	43	3.02	10	3.02	33	3.02	8	3.02	9	3.019	62	3.02	110	3.016	2959	3.016	23	3.024	6	3.024	21	3.024	25	3.024	0	3.024	0	3.024	0	3.024	3
3.024	8	3.023	13	3.024	12	3.023	39	3.024	37	3.024	8	3.024	30	3.024	6	3.024	9	3.023	60	3.024	102	3.02	2884	3.02	21	3.028	5	3.028	19	3.028	24	3.028	0	3.028	0	3.028	0	3.028	3
3.028	7	3.028	13	3.028	10	3.027	32	3.028	34	3.028	7	3.028	26	3.028	6	3.028	8	3.028	57	3.028	95	3.024	2531	3.024	19	3.032	5	3.032	17	3.032	20	3.032	0	3.032	0	3.032	0	3.032	3
3.032	5	3.032	12	3.032	7	3.031	30	3.032	30	3.032	6	3.032	23	3.032	6	3.032	8	3.032	51	3.032	90	3.028	2045	3.028	16	3.036	4	3.036	15	3.036	18	3.036	0	3.036	0	3.036	0	3.036	3
3.036	4	3.036	12	3.036	6	3.035	26	3.036	26	3.036	5	3.036	23	3.036	5	3.036	8	3.036	48	3.036	81	3.032	1530	3.032	15	3.04	3	3.04	14	3.04	19	3.04	0	3.04	0	3.04	0	3.04	2
3.04	3	3.04	12	3.04	7	3.039	24	3.04	25	3.04	6	3.04	21	3.04	4	3.04	6	3.04	48	3.04	77	3.036	1060	3.036	12	3.044	3	3.044	13	3.044	16	3.044	0	3.044	0	3.044	0	3.044	2
3.044	3	3.044	11	3.044	6	3.043	24	3.044	21	3.044	5	3.044	20	3.044	3	3.044	5	3.044	45	3.044	72	3.04	799	3.04	11	3.048	3	3.048	13	3.048	16	3.048	0	3.048	0	3.048	0	3.048	3
3.048	4	3.047	11	3.048	6	3.047	23	3.048	19	3.048	5	3.048	18	3.048	3	3.048	5	3.047	43	3.048	67	3.044	603	3.044	11	3.052	2	3.052	13	3.052	14	3.052	0	3.052	0	3.052	0	3.052	2
3.052	4	3.052	11	3.052	6	3.051	20	3.052	17	3.052	5	3.052	16	3.052	2	3.052	4	3.051	40	3.052	63	3.048	461	3.048	9	3.056	2	3.056	12	3.056	13	3.056	0	3.056	0	3.056	0	3.056	2
3.056	3	3.056	8	3.056	5	3.055	19	3.056	15	3.056	4	3.056	15	3.056	2	3.056	3	3.055	39	3.056	56	3.052	359	3.052	8	3.06	2	3.06	11	3.06	12	3.06	0	3.06	0	3.06	0	3.06	2
3.06	4	3.06	9	3.06	6	3.059	18	3.06	13	3.06	4	3.06	14	3.06	1	3.06	3	3.06	37	3.06	54	3.056	288	3.056	6	3.064	3	3.064	10	3.064	12	3.064	0	3.064	0	3.064	0	3.064	1
3.064	4	3.064	8	3.064	6	3.063	19	3.064	12	3.064	4	3.064	12	3.064	1	3.064	2	3.064	35	3.064	52	3.06	241	3.06	6	3.068	3	3.068	9	3.068	12	3.068	0	3.068	0	3.068	0	3.068	2
3.068	4	3.068	8	3.068	6	3.067	19	3.068	12	3.068	3	3.068	12	3.068	0	3.068	3	3.068	33	3.068	49	3.064	206	3.064	6	3.072	3	3.072	8	3.072	13	3.072	0	3.072	0	3.072	0	3.072	2
3.072	4	3.072	8	3.072	5	3.071	17	3.072	13	3.072	2	3.072	10	3.072	1	3.072	2	3.072	32	3.072	46	3.068	176	3.068	6	3.076	3	3.076	8	3.076	13	3.076	0	3.076	0	3.076	0	3.076	1
3.076	4	3.076	8	3.076	4	3.075	16	3.076	13	3.076	2	3.076	10	3.076	1	3.076	2	3.076	32	3.076	43	3.072	150	3.072	5	3.08	3	3.08	8	3.08	13	3.08	0	3.08	0	3.08	0	3.08	2
3.08	3	3.08	7	3.08	4	3.079	15	3.08	12	3.08	2	3.08	9	3.08	1	3.08	2	3.08	31	3.08	42	3.076	131	3.076	5	3.084	3	3.084	7	3.084	12	3.084	0	3.084	0	3.084	0	3.084	2
3.084	2	3.084	7	3.084	4	3.083	14	3.084	12	3.084	3	3.084	9	3.084	1	3.084	2	3.083	28	3.084	41	3.08	114	3.08	4	3.088	2	3.088	6	3.088	12	3.088	0	3.088	0	3.088	0	3.088	2
3.088	2	3.088	5	3.088	4	3.087	11	3.088	13	3.088	3	3.088	9	3.088	1	3.088	1	3.088	28	3.088	37	3.084	103	3.084	5	3.092	2	3.092	7	3.092	10	3.092	0	3.092	0	3.092	0	3.092	2
3.092	2	3.092	6	3.092	4	3.091	10	3.092	11	3.092	3	3.092	9	3.092	1	3.092	1	3.091	26	3.092	36	3.088	91	3.088	4	3.096	2	3.096	7	3.096	9	3.096	0	3.096	0	3.096	0	3.096	2
3.096	2	3.096	5	3.096	4	3.095	9	3.096	8	3.096	3	3.096	7	3.096	1	3.096	1	3.096	24	3.096	34	3.092	82	3.092	3	3.1	1	3.1	7	3.1	9	3.1	0	3.1	0	3.1	0	3.1	1
3.1	2	3.1	4	3.1	5	3.099	10	3.1	7	3.1	4	3.1	8	3.1	1	3.1	1	3.1	21	3.1	32	3.096	74	3.096	3	3.104	1	3.104	6	3.104	8	3.104	0	3.104	0	3.104	0	3.104	1
3.104	1	3.104	4	3.104	5	3.103	10	3.104	7	3.104	4	3.104	6	3.104	1	3.104	1	3.104	21	3.104	31	3.1	67	3.1	3	3.108	1	3.108	5	3.108	7	3.108	0	3.108	0	3.108	0	3.108	1
3.108	1	3.108	4	3.108	6	3.107	10	3.108	6	3.108	3	3.108	6	3.108	1	3.108	1	3.108	19	3.108	27	3.104	60	3.104	3	3.112	1	3.112	5	3.112	7	3.112	0	3.112	0	3.112	0	3.112	1
3.112	2	3.112	4	3.112	6	3.111	10	3.112	6	3.112	3	3.112	5	3.112	1	3.112	1	3.112	19	3.112	27	3.108	56	3.108	2	3.116	1	3.116	4	3.116	9	3.116	0	3.116	0	3.116	0	3.116	0
3.116	2	3.116	4	3.116	6	3.115	11	3.116	5	3.116	3	3.116	5	3.116	1	3.116	1	3.116	18	3.116	28	3.112	51	3.112	2	3.12	1	3.12	4	3.12	10	3.12	0	3.12	0	3.12	0	3.12	0
3.12	1	3.12	4	3.12	7	3.119	10	3.12	5	3.12	3	3.12	4	3.12	1	3.12	1	3.119	18	3.12	25	3.116	46	3.116	2	3.124	1	3.124	4	3.124	8	3.124	0	3.124	0	3.124	0	3.124	0
3.124	1	3.124	4	3.124	6	3.123	10	3.124	5	3.124	2	3.124	4	3.124	1	3.124	0	3.124	17	3.124	25	3.12	42	3.12	2	3.128	1	3.128	4	3.128	7	3.128	0	3.128	0	3.128	0	3.128	0
3.128	2	3.128	4	3.128	5	3.127	9	3.128	5	3.128	1	3.128	3	3.128	1	3.128	1	3.128	18	3.128	22	3.124	38	3.124	1	3.132	2	3.132	4	3.132	6	3.132	0	3.132	0	3.132	0	3.132	0
3.132	2	3.132	4	3.132	4	3.131	8	3.132	4	3.132	1	3.132	3	3.132	1	3.132	1	3.132	15	3.132	23	3.128	34	3.128	1	3.136	2	3.136	4	3.136	6	3.136	0	3.136	0	3.136	0	3.136	0
3.136	2	3.136	4	3.136	3	3.135	7	3.136	4	3.136	1	3.136	2	3.136	1	3.136	1	3.136	16	3.136	23	3.132	33	3.132	2	3.14	2	3.14	6	3.14	6	3.14	0	3.14	0	3.14	0	3.14	0
3.14	2	3.14	3	3.14	3	3.139	7	3.14	3	3.14	0	3.14	2	3.14	1	3.14	1	3.14	14	3.14	21	3.136	31	3.136	2	3.144	2	3.144	7	3.144	4	3.144	0	3.144	0	3.144	0	3.144	0
3.144	2	3.144	3	3.144	2	3.143	7	3.144	3	3.144	0	3.144	3	3.144	1	3.144	1	3.144	13	3.144	18	3.14	29	3.14	2	3.148	2	3.148	6	3.148	4	3.148	0	3.148	0	3.148	0	3.148	0
3.148	2	3.148	3	3.148	1	3.148	5	3.148	3	3.148	0	3.148	4	3.148	1	3.148	1	3.148	13	3.148	18	3.144	27	3.144	2	3.152	2	3.152	5	3.152	3	3.152	0	3.152	0	3.152	0	3.152	0
3.152	2	3.152	3	3.152	1	3.151	4	3.152	3	3.152	0	3.152	3	3.152	1	3.152	1	3.152	13	3.152	17	3.148	28	3.148	2	3.156	2	3.156	4	3.156	4	3.156	0	3.156	0	3.156	0	3.156	0
3.156	2	3.156	3	3.156	1	3.155	4	3.156	3	3.156	0	3.156	3	3.156	1	3.156	1	3.156	14	3.156	17	3.152	27	3.152	2	3.16	1	3.16	4	3.16	4	3.16	0	3.16	0	3.16	0	3.16	0
3.16	2	3.16	3	3.16	1	3.159	3	3.16	3	3.16	0	3.16	3	3.16	2	3.16	1	3.16	14	3.16	15	3.156	25	3.156	1	3.164	1	3.164	4	3.164	3	3.164	0	3.164	0	3.164	0	3.164	0
3.164	2	3.164	2	3.164	1	3.163	3	3.164	3	3.164	0	3.164	4	3.164	1	3.164	0	3.164	14	3.164	15	3.16	24	3.16	0	3.168	1	3.168	3	3.168	3	3.168	0	3.168	0	3.168	0	3.168	0
3.168	1	3.168	3	3.168	1	3.167	3	3.168	2	3.168	0	3.168	4	3.168	2	3.168	0	3.168	14	3.168	16	3.164	22	3.164	0	3.172	1	3.172	3	3.172	4	3.172	0	3.172	0	3.172	0	3.172	0
3.172	1	3.172	3	3.172	1	3.171	3	3.172	2	3.172	0	3.172	3	3.172	2	3.172	0	3.172	14	3.172	15	3.168	22	3.168	1	3.176	1	3.176	3	3.176	4	3.176	0	3.176	0	3.176	0	3.176	0
3.176	1	3.176	3	3.176	1	3.175	4	3.176	2	3.176	0	3.176	2	3.176	2	3.176	0	3.176	13	3.176	15	3.172	19	3.172	1	3.18	1	3.18	3	3.18	3	3.18	0	3.18	0	3.18	0	3.18	0
3.18	1	3.18	2	3.18	1	3.179	4	3.18	2	3.18	0	3.18	2	3.18	2	3.18	0	3.18	12	3.18	16	3.176	17	3.176	1	3.184	1	3.184	3	3.184	3	3.184	0	3.184	0	3.184	0	3.184	0
3.184	1	3.184	2	3.184	1	3.184	4	3.184	2	3.184	0	3.184	3	3.184	1	3.184	0	3.184	12	3.184	16	3.18	16	3.18	1	3.188	1	3.188	3	3.188	2	3.188	0	3.188	0	3.188	0	3.188	0
3.188	1	3.188	2	3.188	1	3.188	3	3.188	2	3.188	0	3.188	3	3.188	1	3.188	0	3.188	11	3.188	16	3.184	15	3.184	2	3.192	1	3.192	2	3.192	2	3.192	0	3.192	0	3.192	0	3.192	0
3.192	1	3.192	2	3.192	0	3.191	3	3.192	2	3.192	0	3.192	3	3.192	1	3.192	0	3.192	10	3.192	16	3.188	15	3.188	2	3.196	1	3.196	3	3.196	2	3.196	0	3.196	0	3.196	0	3.196	0
3.196	1	3.196	1	3.196	0	3.195	4	3.196	2	3.196	0	3.196	2	3.196	0	3.196	0	3.196	9	3.196	14	3.192	15	3.192	2	3.2	0	3.2	3	3.2	2	3.2	0	3.2	0	3.2	0	3.2	0
3.2	1	3.2	0	3.2	0	3.199	3	3.2	2	3.2	0	3.2	2	3.2	0	3.2	0	3.2	9	3.2	14	3.196	14	3.196	1	3.204	0	3.204	2	3.204	2	3.204	0	3.204	0	3.204	0	3.204	0
3.204	1	3.204	1	3.204	0	3.203	3	3.204	2	3.204	0	3.204	3	3.204	0	3.204	0	3.204	9	3.204	15	3.2	13	3.2	1	3.208	0	3.208	2	3.208	2	3.208	0	3.208	0	3.208	0	3.208	0
3.208	1	3.208	1	3.208	0	3.207	3	3.208	2	3.208	0	3.208	3	3.208	0	3.208	0	3.208	9	3.208	14	3.204	12	3.204	1	3.212	0	3.212	2	3.212	2	3.212	0	3.212	0	3.212	0	3.212	0
3.212	1	3.212	0	3.212	1	3.211	3	3.212	2	3.212	0	3.212	2	3.212	0	3.212	0	3.212	7	3.212	14	3.208	12	3.208	1	3.216	0	3.216	2	3.216	2	3.216	0	3.216	0	3.216	0	3.216	0
3.216	0	3.216	0	3.216	1	3.216	2	3.216	2	3.216	0	3.216	3	3.216	0	3.216	0	3.216	6	3.216	13	3.212	12	3.212	0	3.22	0	3.22	2	3.22	2	3.22	0	3.22	0	3.22	0	3.22	0
3.22	0	3.22	1	3.22	1	3.22	2	3.22	2	3.22	0	3.22	3	3.22	0	3.22	0	3.22	6	3.22	13	3.216	11	3.216	0	3.224	0	3.224	2	3.224	2	3.224	0	3.224	0	3.224	0	3.224	0
3.224	0	3.224	1	3.224	2	3.224	1	3.224	2	3.224	0	3.224	3	3.224	0	3.224	0	3.224	8	3.224	14	3.22	11	3.22	0	3.228	0	3.228	2	3.228	2	3.228	0	3.228	0	3.228	0	3.228	0
3.228	0	3.228	1	3.228	1	3.227	1	3.228	3	3.228	0	3.228	3	3.228	0	3.228	0	3.228	9	3.228	13	3.224	11	3.224	1	3.232	0	3.232	2	3.232	1	3.232	0	3.232	0	3.232	0	3.232	0
3.232	0	3.232	1	3.232	2	3.231	1	3.232	2	3.232	0	3.232	3	3.232	0	3.232	0	3.232	8	3.232	11	3.228	12	3.228	1	3.236	0	3.236	2	3.236	2	3.236	0	3.236	0	3.236	0	3.236	0
3.236	0	3.236	1	3.236	2	3.235	1	3.236	2	3.236	0	3.236	3	3.236	0	3.236	0	3.236	9	3.236	11	3.232	11	3.232	0	3.24	0	3.24	1	3.24	1	3.24	0	3.24	0	3.24	0	3.24	0
3.24	0	3.24	2	3.24	2	3.239	2	3.24	1	3.24	0	3.24	2	3.24	0	3.24	0	3.24	10	3.24	11	3.236	11	3.236	1	3.244	0	3.244	1	3.244	1	3.244	0	3.244	0	3.244	0	3.244	0
3.244	0	3.244	2	3.244	2	3.243	2	3.244	1	3.244	0	3.244	2	3.244	0	3.244	0	3.244	10	3.244	12	3.24	10	3.24	1	3.248	0	3.248	1	3.248	2	3.248	0	3.248	0	3.248	0	3.248	0
3.248	1	3.248	1	3.248	2	3.247	2	3.248	0	3.248	0	3.248	1	3.248	0	3.248	1	3.248	10	3.248	11

## Sheet: methyl_acetate_74.04
2_17_16_SCAPWT		2_17_16_SCAPADH		2_16_16_SCAM		2_16_16SC		2_16_16_AM		2_18_16_mm1		2_18_16_mm2		2_18_16_mm3		2_17mm1		2_17_mm2		2_17_mm3		2_17ajm50p		2_16_AJM		2_16_SCAMLP		2_17SCAPWT		2_17_SCAPADH
1.467	2	1.463	0	1.467	3	1.467	1	1.467	1	1.467	1	1.467	0	1.467	1	1.459	1	1.459	3	1.459	3	1.459	1	1.459	1	1.455	9	1.455	3	1.455	3
1.471	2	1.467	0	1.471	3	1.471	1	1.471	1	1.471	1	1.471	0	1.471	1	1.463	1	1.463	3	1.463	3	1.463	1	1.463	1	1.459	9	1.459	2	1.459	3
1.475	1	1.471	1	1.475	3	1.475	1	1.475	1	1.475	1	1.475	0	1.475	2	1.467	0	1.467	3	1.467	3	1.467	1	1.467	1	1.463	7	1.463	1	1.463	2
1.479	1	1.475	1	1.479	3	1.479	1	1.479	0	1.479	1	1.479	0	1.479	1	1.471	0	1.471	4	1.471	2	1.471	1	1.471	1	1.467	7	1.467	1	1.467	2
1.483	2	1.479	1	1.483	3	1.483	1	1.483	1	1.483	1	1.483	0	1.483	1	1.475	0	1.475	4	1.475	3	1.475	1	1.475	0	1.471	7	1.471	1	1.471	2
1.487	1	1.483	1	1.487	2	1.487	1	1.487	1	1.487	1	1.487	1	1.487	2	1.479	0	1.479	4	1.479	3	1.479	1	1.479	0	1.475	5	1.475	1	1.475	2
1.491	1	1.487	1	1.491	2	1.491	0	1.491	1	1.491	1	1.491	2	1.491	4	1.483	0	1.483	5	1.483	4	1.483	0	1.483	0	1.479	3	1.479	1	1.479	1
1.495	1	1.491	1	1.495	2	1.495	1	1.495	1	1.495	1	1.495	4	1.495	5	1.487	1	1.487	5	1.487	4	1.487	1	1.487	0	1.483	2	1.483	1	1.483	1
1.499	1	1.495	1	1.499	2	1.499	0	1.499	1	1.499	1	1.499	6	1.499	5	1.491	1	1.491	5	1.491	5	1.491	1	1.491	1	1.487	2	1.487	1	1.487	1
1.503	1	1.499	1	1.503	1	1.503	0	1.503	1	1.503	1	1.503	6	1.503	5	1.495	1	1.495	7	1.495	6	1.495	1	1.495	1	1.491	1	1.491	1	1.491	2
1.507	1	1.503	1	1.507	2	1.507	1	1.507	1	1.507	1	1.507	6	1.507	5	1.499	2	1.499	7	1.499	8	1.499	1	1.499	1	1.495	1	1.495	1	1.495	2
1.511	1	1.507	1	1.511	2	1.511	1	1.511	1	1.511	2	1.511	6	1.511	5	1.503	2	1.503	8	1.503	8	1.503	1	1.503	1	1.499	1	1.499	1	1.499	2
1.515	1	1.511	1	1.515	2	1.515	1	1.515	1	1.515	1	1.515	6	1.515	4	1.507	2	1.507	8	1.507	8	1.507	1	1.507	1	1.503	1	1.503	1	1.503	2
1.519	1	1.515	1	1.519	2	1.519	1	1.519	1	1.519	1	1.519	10	1.519	3	1.511	2	1.511	8	1.511	7	1.511	1	1.511	1	1.507	2	1.507	1	1.507	2
1.523	1	1.519	1	1.523	2	1.523	2	1.523	1	1.523	3	1.523	22	1.523	1	1.515	2	1.515	7	1.515	8	1.515	1	1.515	1	1.511	2	1.511	1	1.511	2
1.527	1	1.523	1	1.527	1	1.527	4	1.527	1	1.527	6	1.527	39	1.527	2	1.519	1	1.519	8	1.519	7	1.519	1	1.519	1	1.515	2	1.515	1	1.515	2
1.531	1	1.527	1	1.531	2	1.531	4	1.531	1	1.531	10	1.531	54	1.531	5	1.523	2	1.523	11	1.523	5	1.523	1	1.523	1	1.519	2	1.519	1	1.519	2
1.535	1	1.531	2	1.535	1	1.535	6	1.535	1	1.535	15	1.535	60	1.535	17	1.527	4	1.527	23	1.527	4	1.527	1	1.527	0	1.523	2	1.523	1	1.523	3
1.539	1	1.535	2	1.539	1	1.539	7	1.539	1	1.539	20	1.539	66	1.539	39	1.531	8	1.531	43	1.531	5	1.531	1	1.531	0	1.527	2	1.527	2	1.527	4
1.543	1	1.539	2	1.543	2	1.543	7	1.543	1	1.543	22	1.543	67	1.543	62	1.535	12	1.535	62	1.535	9	1.535	1	1.535	0	1.531	2	1.531	2	1.531	7
1.547	1	1.543	2	1.547	7	1.547	7	1.547	1	1.547	23	1.547	63	1.547	90	1.539	14	1.539	71	1.539	22	1.539	1	1.539	0	1.535	2	1.535	3	1.535	9
1.551	1	1.547	3	1.551	47	1.551	6	1.551	1	1.551	24	1.551	52	1.551	133	1.543	15	1.543	76	1.543	47	1.543	1	1.543	0	1.539	2	1.539	3	1.539	10
1.555	2	1.551	3	1.555	162	1.555	5	1.555	1	1.555	36	1.555	41	1.555	218	1.547	16	1.547	77	1.547	85	1.547	1	1.547	0	1.543	3	1.543	3	1.543	10
1.559	2	1.555	3	1.559	355	1.559	5	1.559	2	1.559	65	1.559	36	1.559	309	1.551	20	1.551	76	1.551	136	1.551	1	1.551	0	1.547	16	1.547	6	1.547	10
1.563	5	1.559	3	1.563	568	1.563	4	1.563	3	1.563	118	1.563	41	1.563	365	1.555	43	1.555	65	1.555	218	1.555	1	1.555	0	1.551	71	1.551	11	1.551	10
1.567	9	1.563	3	1.567	737	1.567	4	1.567	3	1.567	170	1.567	45	1.567	381	1.559	86	1.559	50	1.559	351	1.559	1	1.559	1	1.555	199	1.555	28	1.555	8
1.571	12	1.567	3	1.571	843	1.571	3	1.571	5	1.571	210	1.571	50	1.571	378	1.563	145	1.563	41	1.563	483	1.563	2	1.563	1	1.559	407	1.559	63	1.559	6
1.575	14	1.571	3	1.575	897	1.575	3	1.575	7	1.575	237	1.575	51	1.575	362	1.567	200	1.567	43	1.567	572	1.567	2	1.567	1	1.563	685	1.563	105	1.563	4
1.579	16	1.575	2	1.579	890	1.579	2	1.579	8	1.579	254	1.579	50	1.579	326	1.571	241	1.571	49	1.571	613	1.571	2	1.571	1	1.567	914	1.567	148	1.567	3
1.583	17	1.579	1	1.583	793	1.583	2	1.583	8	1.583	251	1.583	43	1.583	243	1.575	264	1.575	53	1.575	609	1.575	3	1.575	1	1.571	1057	1.571	175	1.571	3
1.587	18	1.583	1	1.587	608	1.587	2	1.587	8	1.587	223	1.587	34	1.587	151	1.579	274	1.579	54	1.579	577	1.579	3	1.579	2	1.575	1127	1.575	191	1.575	4
1.591	15	1.587	1	1.591	401	1.591	1	1.591	8	1.591	170	1.591	24	1.591	86	1.583	256	1.583	53	1.583	505	1.583	4	1.583	2	1.579	1114	1.579	199	1.579	3
1.595	11	1.591	1	1.595	238	1.595	1	1.595	7	1.595	117	1.595	14	1.595	49	1.587	216	1.587	48	1.587	379	1.587	5	1.587	2	1.583	1008	1.583	189	1.583	3
1.599	8	1.595	1	1.599	134	1.599	1	1.599	4	1.599	77	1.599	8	1.599	29	1.591	157	1.591	41	1.591	246	1.591	5	1.591	2	1.587	810	1.587	159	1.587	3
1.603	5	1.599	1	1.603	78	1.603	0	1.603	3	1.603	51	1.603	5	1.603	18	1.595	102	1.595	29	1.595	149	1.595	6	1.595	2	1.591	539	1.591	121	1.591	3
1.607	3	1.603	1	1.607	49	1.607	1	1.607	3	1.607	33	1.607	3	1.607	11	1.599	62	1.599	20	1.599	86	1.599	5	1.599	2	1.595	313	1.595	80	1.595	2
1.611	2	1.607	1	1.611	34	1.611	0	1.611	2	1.611	22	1.611	3	1.611	7	1.603	39	1.603	14	1.603	53	1.603	4	1.603	2	1.599	174	1.599	54	1.599	1
1.615	1	1.611	1	1.615	28	1.615	0	1.615	2	1.615	16	1.615	2	1.615	5	1.607	26	1.607	10	1.607	36	1.607	4	1.607	1	1.603	91	1.603	38	1.603	1
1.619	1	1.615	1	1.619	23	1.619	0	1.619	2	1.619	13	1.619	1	1.619	4	1.611	19	1.611	8	1.611	27	1.611	3	1.611	1	1.607	53	1.607	25	1.607	2
1.623	1	1.619	1	1.623	17	1.623	0	1.623	2	1.623	10	1.623	1	1.623	3	1.615	13	1.615	7	1.615	20	1.615	2	1.615	1	1.611	33	1.611	18	1.611	2
1.627	1	1.623	1	1.627	15	1.627	0	1.627	2	1.627	8	1.627	1	1.627	2	1.619	10	1.619	6	1.619	17	1.619	2	1.619	1	1.615	24	1.615	13	1.615	2
1.631	1	1.627	1	1.631	14	1.631	0	1.631	2	1.631	6	1.631	1	1.631	2	1.623	8	1.623	4	1.623	14	1.623	1	1.623	1	1.619	20	1.619	10	1.619	2
1.635	1	1.631	1	1.635	11	1.635	0	1.635	1	1.635	6	1.635	0	1.635	2	1.627	7	1.627	4	1.627	11	1.627	2	1.627	1	1.623	18	1.623	8	1.623	2
1.639	1	1.635	0	1.639	9	1.639	0	1.639	1	1.639	5	1.639	0	1.639	2	1.631	5	1.631	3	1.631	9	1.631	2	1.631	1	1.627	15	1.627	8	1.627	2
		1.639	0													1.635	5	1.635	2	1.635	8	1.635	2	1.635	1	1.631	14	1.631	6	1.631	2
																1.639	4	1.639	2	1.639	8	1.639	2	1.639	1	1.635	12	1.635	6	1.635	1

## Sheet: acetic_acid_60.05
SCAPWT1_2_17_16		SCAPADH1_2_17_16		2_17_16_mm1		2_17_16_mm2		2_17_16_mm3		SCAM_2_16_16		SC_2_16_16		AM_2_16_16		AJM_2_16		ajm50p_2_17		scaplpadh_2_17		scaplpWT_2_17		scamlp_2_16
1.755	3	1.755	3	1.787	3378	1.787	599	1.787	59	1.787	507	1.787	4	1.787	1	1.783	0	1.779	0	1.779	2	1.779	722	1.779	1
1.759	3	1.759	2	1.791	4573	1.791	910	1.791	286	1.791	777	1.791	5	1.791	1	1.787	0	1.783	0	1.783	2	1.783	1698	1.783	1
1.763	3	1.763	1	1.795	5928	1.795	1744	1.795	599	1.795	1102	1.795	90	1.795	1	1.791	0	1.787	0	1.787	3	1.787	2836	1.787	1
1.767	2	1.767	2	1.799	7333	1.799	2687	1.799	1489	1.799	1916	1.799	160	1.799	1	1.795	0	1.791	0	1.791	2	1.791	4080	1.791	84
1.771	2	1.771	1	1.803	8833	1.803	3794	1.803	2543	1.803	2766	1.803	212	1.803	1	1.799	0	1.795	0	1.795	2	1.795	5525	1.795	236
1.775	1	1.775	1	1.807	9904	1.807	4847	1.807	3730	1.807	3557	1.807	259	1.807	1	1.803	1	1.799	0	1.799	3	1.799	6958	1.799	432
1.779	2	1.779	1	1.811	10973	1.811	5863	1.811	5074	1.811	4471	1.811	300	1.811	1	1.807	1	1.803	1	1.803	3	1.803	8385	1.803	684
1.783	2	1.783	1	1.815	12158	1.815	7052	1.815	6566	1.815	5514	1.815	337	1.815	0	1.811	1	1.807	1	1.807	3	1.807	9925	1.807	952
1.787	2	1.787	1	1.819	13429	1.819	8353	1.819	8011	1.819	6664	1.819	374	1.819	0	1.815	1	1.811	0	1.811	3	1.811	10970	1.811	1731
1.791	121	1.791	1	1.823	14556	1.823	9115	1.823	9519	1.823	7907	1.823	314	1.823	0	1.819	1	1.815	0	1.815	3	1.815	12067	1.815	2626
1.795	291	1.795	1	1.827	15693	1.827	9914	1.827	10712	1.827	8740	1.827	272	1.827	0	1.823	1	1.819	0	1.819	3	1.819	13232	1.819	3539
1.799	519	1.799	1	1.831	16837	1.831	10759	1.831	11880	1.831	9644	1.831	247	1.831	0	1.827	1	1.823	0	1.823	23	1.823	14237	1.823	4499
1.803	783	1.803	0	1.835	18048	1.835	11600	1.835	13054	1.835	10670	1.835	227	1.835	0	1.831	0	1.827	0	1.827	45	1.827	15428	1.827	5473
1.807	1101	1.807	0	1.839	19381	1.839	12463	1.839	14279	1.839	11708	1.839	209	1.839	1	1.835	0	1.831	0	1.831	72	1.831	16694	1.831	6477
1.811	2050	1.811	0	1.843	20644	1.843	13200	1.843	15400	1.843	12602	1.843	194	1.843	1	1.839	0	1.835	0	1.835	98	1.835	17693	1.835	7626
1.815	3090	1.815	0	1.847	21866	1.847	13954	1.847	16652	1.847	13472	1.847	180	1.847	1	1.843	0	1.839	0	1.839	128	1.839	18870	1.839	8487
1.819	4163	1.819	0	1.851	23087	1.851	14864	1.851	18019	1.851	14447	1.851	174	1.851	1	1.847	0	1.843	0	1.843	155	1.843	20167	1.843	9344
1.823	5339	1.823	1	1.855	24383	1.855	15751	1.855	19199	1.855	15466	1.855	165	1.855	1	1.851	0	1.847	0	1.847	180	1.847	21400	1.847	10141
1.827	6540	1.827	3	1.859	25748	1.859	16538	1.859	20531	1.859	16559	1.859	160	1.859	1	1.855	0	1.851	0	1.851	185	1.851	22856	1.851	10906
1.831	7852	1.831	13	1.863	27067	1.863	17456	1.863	22124	1.863	17571	1.863	152	1.863	1	1.859	0	1.855	0	1.855	187	1.855	24082	1.855	11755
1.835	9209	1.835	23	1.867	28300	1.867	18412	1.867	23662	1.867	18627	1.867	149	1.867	1	1.863	0	1.859	0	1.859	180	1.859	25161	1.859	12648
1.839	10121	1.839	31	1.871	29693	1.871	19426	1.871	25262	1.871	19766	1.871	144	1.871	0	1.867	0	1.863	0	1.863	175	1.863	26674	1.863	13561
1.843	11078	1.843	41	1.875	31095	1.875	20480	1.875	26819	1.875	20878	1.875	139	1.875	0	1.871	0	1.867	0	1.867	163	1.867	28292	1.867	14441
1.847	12071	1.847	50	1.879	32616	1.879	21615	1.879	28409	1.879	22220	1.879	138	1.879	0	1.875	0	1.871	0	1.871	155	1.871	29740	1.871	15265
1.851	13098	1.851	59	1.883	34100	1.883	22749	1.883	30246	1.883	23727	1.883	133	1.883	0	1.879	0	1.875	0	1.875	148	1.875	31170	1.875	16165
1.855	14116	1.855	66	1.887	35500	1.887	23873	1.887	32087	1.887	25195	1.887	125	1.887	0	1.883	0	1.879	0	1.879	140	1.879	32534	1.879	17301
1.859	15173	1.859	66	1.891	36990	1.891	25145	1.891	33689	1.891	26828	1.891	120	1.891	0	1.887	0	1.883	0	1.883	134	1.883	34192	1.883	18565
1.863	16314	1.863	64	1.895	38784	1.895	26761	1.895	35486	1.895	28612	1.895	114	1.895	1	1.891	0	1.887	0	1.887	132	1.887	36097	1.887	19752
1.867	17417	1.867	63	1.899	40646	1.899	28605	1.899	37469	1.899	30525	1.899	111	1.899	1	1.895	0	1.891	0	1.891	127	1.891	38062	1.891	20857
1.871	18503	1.871	61	1.903	42644	1.903	31012	1.903	40056	1.903	32833	1.903	108	1.903	1	1.899	0	1.895	0	1.895	125	1.895	40169	1.895	21939
1.875	19650	1.875	59	1.907	44678	1.907	34034	1.907	43416	1.907	35392	1.907	102	1.907	0	1.903	1	1.899	0	1.899	123	1.899	42307	1.899	23085
1.879	20844	1.879	58	1.911	46657	1.911	31138	1.911	46832	1.911	38169	1.911	104	1.911	0	1.907	0	1.903	0	1.903	118	1.903	45109	1.903	24394
1.883	21976	1.883	56	1.915	48945	1.915	28136	1.915	49821	1.915	34727	1.915	103	1.915	0	1.911	0	1.907	0	1.907	115	1.907	49195	1.907	25722
1.887	23004	1.887	55	1.919	51288	1.919	33092	1.919	52559	1.919	31013	1.919	101	1.919	1	1.915	0	1.911	0	1.911	113	1.911	53977	1.911	27162
1.891	24110	1.891	55	1.923	53731	1.923	29265	1.923	55044	1.923	26871	1.923	101	1.923	0	1.919	0	1.915	0	1.915	109	1.915	58278	1.915	29057
1.895	25162	1.895	55	1.927	56108	1.927	25053	1.927	57187	1.927	22443	1.927	98	1.927	0	1.923	0	1.919	0	1.919	115	1.919	60900	1.919	26476
1.899	26394	1.899	55	1.931	58249	1.931	20060	1.931	59073	1.931	17506	1.931	93	1.931	1	1.927	0	1.923	0	1.923	122	1.923	61945	1.923	23716
1.903	27716	1.903	55	1.935	60529	1.935	14259	1.935	60094	1.935	16616	1.935	92	1.935	1	1.931	0	1.927	0	1.927	135	1.927	55702	1.927	20826
1.907	29180	1.907	55	1.939	62975	1.939	14322	1.939	60817	1.939	10538	1.939	88	1.939	1	1.935	0	1.931	0	1.931	149	1.931	56000	1.931	21715
1.911	30881	1.911	53	1.943	64968	1.943	24819	1.943	62004	1.943	17630	1.943	85	1.943	1	1.939	0	1.935	0	1.935	158	1.935	56411	1.935	22751
1.915	28134	1.915	53	1.947	66813	1.947	26374	1.947	63473	1.947	25145	1.947	83	1.947	1	1.943	0	1.939	0	1.939	158	1.939	56907	1.939	23865
1.919	25106	1.919	53	1.951	68423	1.951	36193	1.951	64899	1.951	33203	1.951	81	1.951	1	1.947	0	1.943	0	1.943	159	1.943	57934	1.943	24927
1.923	27682	1.923	55	1.955	70069	1.955	46120	1.955	66765	1.955	41608	1.955	80	1.955	1	1.951	0	1.947	0	1.947	152	1.947	60022	1.947	30415
1.927	30140	1.927	56	1.959	71726	1.959	55938	1.959	68478	1.959	50400	1.959	79	1.959	1	1.955	0	1.951	1	1.951	140	1.951	63091	1.951	30629
1.931	32555	1.931	60	1.963	63121	1.963	66015	1.963	70054	1.963	54660	1.963	79	1.963	1	1.959	0	1.955	1	1.955	123	1.955	73703	1.955	36514
1.935	34575	1.935	62	1.967	64404	1.967	76374	1.967	71863	1.967	63870	1.967	79	1.967	1	1.963	0	1.959	1	1.959	107	1.959	77011	1.959	38525
1.939	36320	1.939	66	1.971	65810	1.971	76302	1.971	73633	1.971	66692	1.971	74	1.971	1	1.967	0	1.963	1	1.963	96	1.963	78693	1.963	40266
1.943	42548	1.943	64	1.975	67241	1.975	77000	1.975	75409	1.975	69282	1.975	75	1.975	1	1.971	0	1.967	1	1.967	93	1.967	79288	1.967	41781
1.947	49021	1.947	62	1.979	68619	1.979	77897	1.979	77258	1.979	71406	1.979	74	1.979	1	1.975	0	1.971	1	1.971	91	1.971	79720	1.971	43123
1.951	50175	1.951	60	1.983	69583	1.983	78698	1.983	78804	1.983	73515	1.983	72	1.983	1	1.979	0	1.975	1	1.975	89	1.975	80625	1.975	44719
1.955	51270	1.955	57	1.987	70452	1.987	79694	1.987	80009	1.987	75239	1.987	74	1.987	1	1.983	0	1.979	1	1.979	86	1.979	81591	1.979	51835
1.959	52235	1.959	50	1.991	81492	1.991	80685	1.991	81093	1.991	76815	1.991	74	1.991	1	1.987	0	1.983	0	1.983	88	1.983	82191	1.983	53487
1.963	53509	1.963	45	1.995	82318	1.995	81361	1.995	82060	1.995	78325	1.995	76	1.995	1	1.991	0	1.987	0	1.987	86	1.987	82943	1.987	55166
1.967	55032	1.967	44	1.999	83280	1.999	82042	1.999	82733	1.999	79117	1.999	84	1.999	1	1.995	0	1.991	0	1.991	85	1.991	83771	1.991	57181
1.971	56874	1.971	42	2.003	84027	2.003	82693	2.003	78383	2.003	79803	2.003	90	2.003	1	1.999	0	1.995	0	1.995	83	1.995	84469	1.995	59217
1.975	58762	1.975	42	2.007	84392	2.007	83317	2.007	68413	2.007	80745	2.007	111	2.007	2	2.003	1	1.999	0	1.999	79	1.999	85180	1.999	61192
1.979	60415	1.979	42	2.011	85018	2.011	83960	2.011	57652	2.011	81440	2.011	132	2.011	2	2.007	1	2.003	0	2.003	77	2.003	85783	2.003	63486
1.983	62081	1.983	40	2.015	85693	2.015	84556	2.015	46588	2.015	71170	2.015	147	2.015	5	2.011	1	2.007	0	2.007	78	2.007	86443	2.007	65734
1.987	63900	1.987	41	2.019	86104	2.019	84977	2.019	35074	2.019	60933	2.019	161	2.019	6	2.015	1	2.011	0	2.011	76	2.011	87041	2.011	67841
1.991	66131	1.991	42	2.023	86555	2.023	85557	2.023	23308	2.023	61571	2.023	165	2.023	8	2.019	1	2.015	0	2.015	83	2.015	87472	2.015	70059
1.995	68447	1.995	41	2.027	86823	2.027	86059	2.027	11538	2.027	62262	2.027	161	2.027	11	2.023	1	2.019	0	2.019	89	2.019	87988	2.019	72034
1.999	70141	1.999	40	2.031	87201	2.031	86456	2.031	4551	2.031	62880	2.031	155	2.031	14	2.027	1	2.023	0	2.023	95	2.023	88552	2.023	73861
2.003	71864	2.003	40	2.035	87759	2.035	86859	2.035	3040	2.035	63346	2.035	132	2.035	18	2.031	0	2.027	0	2.027	104	2.027	89050	2.027	75613
2.007	73733	2.007	41	2.039	88330	2.039	87559	2.039	2159	2.039	63752	2.039	109	2.039	19	2.035	0	2.031	0	2.031	108	2.031	89469	2.031	76910
2.011	75492	2.011	46	2.043	88977	2.043	88150	2.043	1510	2.043	75135	2.043	89	2.043	21	2.039	0	2.035	0	2.035	109	2.035	89946	2.035	78067
2.015	77116	2.015	52	2.047	89488	2.047	88522	2.047	1343	2.047	86450	2.047	69	2.047	21	2.043	0	2.039	0	2.039	107	2.039	90571	2.039	79249
2.019	78253	2.019	58	2.051	89912	2.051	89018	2.051	1225	2.051	86714	2.051	58	2.051	21	2.047	0	2.043	0	2.043	99	2.043	91364	2.043	80151
2.023	79095	2.023	65	2.055	85021	2.055	89583	2.055	1115	2.055	87094	2.055	51	2.055	21	2.051	0	2.047	1	2.047	87	2.047	91831	2.047	80919
2.027	80268	2.027	73	2.059	73996	2.059	90244	2.059	1034	2.059	87620	2.059	49	2.059	19	2.055	0	2.051	1	2.051	77	2.051	92369	2.051	81685
2.031	81276	2.031	78	2.063	62335	2.063	90943	2.063	966	2.063	88051	2.063	46	2.063	18	2.059	0	2.055	1	2.055	63	2.055	92914	2.055	82409
2.035	82119	2.035	78	2.067	50260	2.067	91246	2.067	915	2.067	88714	2.067	45	2.067	18	2.063	0	2.059	1	2.059	56	2.059	93427	2.059	83043
2.039	82993	2.039	79	2.071	37899	2.071	91696	2.071	864	2.071	89246	2.071	45	2.071	17	2.067	0	2.063	0	2.063	49	2.063	93726	2.063	83565
2.043	83839	2.043	72	2.075	25244	2.075	92349	2.075	839	2.075	89695	2.075	44	2.075	18	2.072	0	2.067	0	2.067	45	2.067	93932	2.067	84161
2.047	84409	2.047	65	2.079	12597	2.079	92821	2.079	813	2.079	90254	2.079	44	2.079	19	2.075	0	2.071	0	2.071	43	2.071	94209	2.071	84825
2.051	85001	2.051	55	2.083	5133	2.083	93188	2.083	781	2.083	90843	2.083	45	2.083	19	2.079	0	2.075	0	2.075	45	2.075	94741	2.075	85294
2.055	85532	2.055	44	2.087	3712	2.087	93496	2.087	751	2.087	91367	2.087	43	2.087	20	2.083	0	2.079	0	2.079	45	2.079	95055	2.079	85780
2.059	86058	2.059	37	2.091	2851	2.091	93751	2.091	722	2.091	91826	2.091	44	2.091	22	2.087	0	2.083	0	2.083	47	2.083	90549	2.083	86221
2.063	86448	2.063	32	2.095	2181	2.095	94202	2.095	699	2.095	92111	2.095	44	2.095	22	2.091	0	2.087	0	2.087	45	2.087	79486	2.087	86668
2.067	86842	2.067	25	2.099	1644	2.099	94751	2.099	672	2.099	92588	2.099	45	2.099	22	2.096	0	2.091	0	2.091	47	2.091	67432	2.091	87341
2.071	87397	2.071	25	2.103	1496	2.103	95192	2.103	653	2.103	93123	2.103	45	2.103	22	2.1	0	2.095	0	2.095	48	2.095	54983	2.095	87838
2.075	87962	2.075	24	2.107	1365	2.107	95524	2.107	636	2.107	93576	2.107	44	2.107	22	2.104	0	2.099	0	2.099	48	2.099	42118	2.099	88278
2.079	88622	2.079	24	2.111	1280	2.111	83442	2.111	608	2.111	93803	2.111	44	2.111	22	2.108	0	2.103	0	2.103	47	2.103	28654	2.103	88789
2.083	89216	2.083	26	2.115	1192	2.115	73328	2.115	592	2.115	94076	2.115	43	2.115	21	2.112	0	2.107	0	2.107	49	2.107	15321	2.107	89347
2.087	89498	2.087	27	2.119	1118	2.119	61330	2.119	574	2.119	94352	2.119	44	2.119	21	2.115	0	2.111	0	2.111	50	2.111	6665	2.111	89844
2.091	89858	2.091	27	2.123	1068	2.123	48734	2.123	556	2.123	94589	2.123	45	2.123	21	2.119	0	2.115	0	2.115	50	2.115	4461	2.115	90238
2.095	90159	2.095	28	2.127	1011	2.127	35760	2.127	550	2.127	94784	2.127	43	2.127	22	2.123	0	2.119	0	2.119	50	2.119	3309	2.119	90486
2.099	90247	2.099	27	2.131	963	2.131	22689	2.131	521	2.131	95009	2.131	44	2.131	21	2.127	1	2.123	0	2.123	49	2.123	2443	2.123	90896
2.103	90605	2.103	28	2.135	918	2.135	9140	2.135	500	2.135	95209	2.135	46	2.135	21	2.132	1	2.127	0	2.127	49	2.127	1761	2.127	91206
2.107	85999	2.107	27	2.139	863	2.139	8077	2.139	495	2.139	95609	2.139	47	2.139	21	2.136	1	2.131	0	2.131	50	2.131	1610	2.131	91567
2.111	75268	2.111	26	2.143	827	2.143	4998	2.143	488	2.143	90874	2.143	45	2.143	20	2.14	1	2.135	0	2.135	46	2.135	1467	2.135	91914
2.115	63752	2.115	25	2.147	790	2.147	3700	2.147	482	2.147	80135	2.147	43	2.147	22	2.144	1	2.139	0	2.139	44	2.139	1352	2.139	80217
2.119	51797	2.119	26	2.151	757	2.151	2834	2.151	471	2.151	68430	2.151	44	2.151	21	2.148	1	2.143	0	2.143	46	2.143	1282	2.143	68557
2.123	39696	2.123	25	2.155	727	2.155	2161	2.155	450	2.155	56238	2.155	45	2.155	22	2.151	0	2.147	0	2.147	44	2.147	1196	2.147	69167
2.127	27040	2.127	27	2.159	701	2.159	1598	2.159	442	2.159	43683	2.159	42	2.159	23	2.155	0	2.151	0	2.151	46	2.151	1125	2.151	69758
2.131	14127	2.131	28	2.163	687	2.163	1485	2.163	432	2.163	30905	2.163	40	2.163	23	2.159	0	2.155	0	2.155	47	2.155	1061	2.155	70188
2.135	6020	2.135	29	2.167	673	2.167	1381	2.167	422	2.167	17804	2.167	41	2.167	23	2.164	0	2.159	0	2.159	45	2.159	1007	2.159	70514
2.139	4010	2.14	28	2.171	647	2.171	1289	2.171	411	2.171	9610	2.171	42	2.171	25	2.168	0	2.163	0	2.163	46	2.163	976	2.163	70643
2.143	2938	2.144	29	2.175	629	2.175	1198	2.175	403	2.175	7102	2.175	41	2.175	22	2.172	0	2.167	0	2.167	48	2.167	938	2.167	82908
2.147	2225	2.148	29	2.179	612	2.179	1134	2.179	391	2.179	5520	2.179	38	2.179	23	2.176	0	2.171	0	2.171	47	2.171	898	2.171	95298
2.151	1633	2.151	28	2.183	606	2.183	1074	2.183	389	2.183	4405	2.183	36	2.183	21	2.18	0	2.175	0	2.175	48	2.175	864	2.175	95405
2.155	1484	2.155	27	2.187	591	2.187	1019	2.188	385	2.187	3555	2.187	37	2.187	21	2.184	0	2.179	0	2.179	49	2.179	841	2.179	95566
2.159	1382	2.159	27	2.191	575	2.191	957	2.191	383	2.191	2876	2.191	38	2.191	20	2.187	0	2.183	0	2.183	46	2.183	820	2.183	95931
2.163	1276	2.163	26	2.195	557	2.195	927	2.195	379	2.195	2351	2.195	38	2.195	19	2.191	0	2.187	0	2.187	48	2.187	796	2.187	96407
2.167	1180	2.167	26	2.199	543	2.199	897	2.199	372	2.199	1906	2.199	38	2.199	18	2.196	0	2.191	0	2.191	46	2.191	764	2.191	97138
2.171	1109	2.172	26													2.2	0	2.195	0	2.195	43	2.195	743	2.195	85289
2.175	1040	2.176	25
2.179	981	2.18	27
2.183	934	2.184	28
2.187	881	2.188	26
2.191	845	2.191	25
2.195	816	2.195	25
2.199	787	2.2	26

## Sheet: ethylacetate_88.08
SCAM_2_16_16		SC_2_16_16		AM_2_16_16		SCAP_WT1_2_17_16		SCAP_ADH_2_17_16		mm1_2_17_16		mm2_2_17_16		mm3_2_17_16		2_16ajm		2_17ajm50p		2_16_SCAMLP		2_17scamlpWT		2_17_SCamlpADH
1.831	0	1.831	0	1.831	0	1.831	0	1.827	0	1.831	0	1.831	16	1.827	1	1.819	0	1.819	0	1.795	0	1.795	0	1.795	0
1.835	0	1.835	0	1.835	0	1.835	0	1.831	0	1.835	0	1.835	1	1.831	0	1.823	0	1.823	0	1.799	0	1.799	0	1.799	0
1.839	0	1.839	0	1.839	0	1.839	0	1.835	0	1.839	0	1.839	0	1.835	0	1.827	0	1.827	0	1.803	0	1.803	0	1.803	0
1.843	0	1.843	0	1.843	0	1.843	0	1.839	0	1.843	0	1.843	0	1.839	0	1.831	0	1.831	0	1.807	0	1.807	0	1.807	0
1.847	0	1.847	0	1.847	0	1.847	0	1.843	0	1.847	0	1.847	0	1.843	0	1.835	0	1.835	0	1.811	0	1.811	0	1.811	0
1.851	0	1.851	0	1.851	0	1.851	0	1.847	0	1.851	0	1.851	0	1.847	0	1.839	0	1.839	0	1.815	0	1.815	0	1.815	0
1.855	0	1.855	0	1.855	0	1.855	0	1.851	0	1.855	0	1.855	0	1.851	0	1.843	0	1.843	0	1.819	0	1.819	0	1.819	0
1.859	0	1.859	0	1.859	0	1.859	0	1.855	0	1.859	0	1.859	0	1.855	0	1.847	0	1.847	0	1.823	0	1.823	0	1.823	0
1.863	0	1.863	0	1.863	0	1.863	0	1.859	0	1.863	0	1.863	0	1.859	0	1.851	0	1.851	0	1.827	0	1.827	0	1.827	0
1.867	0	1.867	0	1.867	0	1.867	0	1.863	0	1.867	0	1.867	0	1.863	0	1.855	0	1.855	0	1.831	0	1.831	0	1.831	0
1.871	0	1.871	0	1.871	0	1.871	0	1.867	0	1.871	0	1.871	0	1.867	0	1.859	0	1.859	0	1.835	0	1.835	0	1.835	0
1.875	0	1.875	0	1.875	0	1.875	0	1.871	0	1.875	0	1.875	0	1.871	0	1.863	0	1.863	0	1.839	0	1.839	0	1.839	0
1.879	0	1.879	0	1.879	0	1.879	0	1.875	0	1.879	0	1.879	0	1.875	0	1.867	0	1.867	0	1.843	0	1.843	0	1.843	0
1.883	0	1.883	0	1.883	0	1.883	0	1.879	0	1.883	0	1.883	0	1.879	0	1.871	0	1.871	0	1.847	0	1.847	0	1.847	0
1.887	0	1.887	0	1.887	0	1.887	0	1.883	0	1.887	1	1.887	0	1.883	0	1.875	0	1.875	0	1.851	0	1.851	0	1.851	0
1.891	0	1.891	0	1.891	0	1.891	0	1.887	0	1.891	1	1.891	1	1.887	1	1.879	0	1.879	0	1.855	0	1.855	0	1.855	0
1.895	0	1.895	0	1.895	0	1.895	2	1.891	0	1.895	1	1.895	18	1.891	15	1.883	0	1.883	0	1.859	0	1.859	0	1.859	0
1.899	3	1.899	0	1.899	0	1.899	19	1.895	0	1.899	1	1.899	245	1.895	143	1.887	0	1.887	0	1.863	0	1.863	0	1.863	0
1.903	76	1.903	0	1.903	0	1.903	124	1.899	0	1.903	3	1.903	2921	1.899	1267	1.891	0	1.891	0	1.867	0	1.867	0	1.867	0
1.907	1287	1.907	1	1.907	0	1.907	410	1.903	0	1.907	24	1.907	8794	1.903	3612	1.895	0	1.895	0	1.871	0	1.871	0	1.871	0
1.911	4710	1.911	4	1.911	0	1.911	1468	1.907	0	1.911	135	1.911	17562	1.907	7221	1.899	0	1.899	0	1.875	0	1.875	0	1.875	0
1.915	10953	1.915	7	1.915	0	1.915	3011	1.911	1	1.915	432	1.915	18435	1.911	11881	1.903	0	1.903	0	1.879	0	1.879	0	1.879	0
1.919	11818	1.919	13	1.919	0	1.919	7603	1.915	6	1.919	1612	1.919	19302	1.915	17573	1.907	0	1.907	0	1.883	0	1.883	0	1.883	0
1.923	12676	1.923	20	1.923	0	1.923	11022	1.919	15	1.923	3115	1.923	20146	1.919	24186	1.911	0	1.911	0	1.887	0	1.887	0	1.887	0
1.927	13525	1.927	25	1.927	0	1.927	14881	1.923	28	1.927	4652	1.927	20776	1.923	31336	1.915	0	1.915	0	1.891	0	1.891	0	1.891	0
1.931	14298	1.931	28	1.931	0	1.931	18163	1.927	50	1.931	5845	1.931	18953	1.927	37238	1.919	0	1.919	0	1.895	0	1.895	4	1.895	0
1.935	20246	1.935	28	1.935	0	1.935	20319	1.931	75	1.935	6151	1.935	13930	1.931	40191	1.923	0	1.923	0	1.899	1	1.899	62	1.899	0
1.939	17646	1.939	27	1.939	0	1.939	20588	1.935	92	1.939	6198	1.939	6018	1.935	39709	1.927	0	1.927	0	1.903	21	1.903	1028	1.903	0
1.943	13530	1.943	23	1.943	0	1.943	19317	1.939	102	1.943	5977	1.943	10214	1.939	36539	1.931	0	1.931	0	1.907	241	1.907	3838	1.907	0
1.947	12988	1.947	18	1.947	1	1.947	14834	1.943	105	1.947	4830	1.947	11257	1.943	31057	1.935	0	1.935	0	1.911	1985	1.911	9260	1.911	0
1.951	12269	1.951	11	1.951	2	1.951	11457	1.947	100	1.951	3341	1.951	10562	1.947	24518	1.939	0	1.939	0	1.915	5704	1.915	16859	1.915	5
1.955	11485	1.955	6	1.955	2	1.955	7606	1.951	89	1.955	1812	1.955	9789	1.951	17281	1.943	0	1.943	0	1.919	6565	1.919	17728	1.919	35
1.959	10682	1.959	3	1.959	2	1.959	4235	1.955	67	1.959	624	1.959	9003	1.955	10289	1.947	0	1.947	0	1.923	7429	1.923	18592	1.923	94
1.963	3556	1.963	2	1.963	2	1.963	1802	1.959	45	1.963	302	1.963	8197	1.959	5010	1.951	0	1.951	1	1.927	15186	1.927	19400	1.927	177
1.967	2755	1.967	1	1.967	2	1.967	485	1.963	28	1.967	148	1.967	7381	1.963	1903	1.955	0	1.955	1	1.931	22337	1.931	26798	1.931	257
1.971	648	1.971	1	1.971	2	1.971	223	1.967	16	1.971	73	1.971	2344	1.967	427	1.959	0	1.959	2	1.935	27541	1.935	29687	1.935	313
1.975	345	1.975	1	1.975	2	1.975	122	1.971	9	1.975	43	1.975	462	1.971	229	1.963	0	1.963	4	1.939	29115	1.939	27359	1.939	346
1.979	217	1.979	1	1.979	1	1.979	84	1.975	5	1.979	31	1.979	321	1.975	152	1.967	1	1.967	4	1.943	26994	1.943	21048	1.943	360
1.983	162	1.983	1	1.983	1	1.983	64	1.979	3	1.983	24	1.983	259	1.979	118	1.971	1	1.971	5	1.947	26387	1.947	20337	1.947	343
1.987	133	1.987	1	1.987	1	1.987	52	1.983	3	1.987	18	1.987	213	1.983	89	1.975	1	1.975	5	1.951	25623	1.951	19538	1.951	289
1.991	111	1.991	1	1.991	0	1.991	45	1.987	1	1.991	15	1.991	184	1.987	77	1.979	1	1.979	5	1.955	17917	1.955	18709	1.955	207
1.995	97	1.995	1	1.995	0	1.995	39	1.991	1	1.995	13	1.995	159	1.991	65	1.983	1	1.983	5	1.959	10778	1.959	10373	1.959	130
1.999	87	1.999	0	1.999	0	1.999	33	1.995	1	1.999	12	1.999	141	1.995	57	1.987	0	1.987	4	1.963	5378	1.963	4698	1.963	75
2.003	72	2.003	0	2.003	0	2.003	26	1.999	2	2.003	10	2.003	123	1.999	48	1.991	0	1.991	2	1.967	2076	1.967	1624	1.967	44
2.007	67	2.007	0	2.007	0	2.007	22	2.003	2	2.007	9	2.007	110	2.003	41	1.995	0	1.995	2	1.971	490	1.971	353	1.971	27
2.011	59	2.011	0	2.011	0	2.011	19	2.007	2	2.011	8	2.011	99	2.007	37	1.999	0	1.999	2	1.975	249	1.975	209	1.975	14
2.015	50	2.015	0	2.015	0	2.015	18	2.011	1	2.015	7	2.015	88	2.011	34	2.003	0	2.003	2	1.979	160	1.979	149	1.979	11
2.019	42	2.019	0	2.019	0	2.019	17	2.015	1	2.019	5	2.019	80	2.015	29	2.007	0	2.007	2	1.983	118	1.983	123	1.983	10
2.023	39	2.023	0	2.023	0	2.023	16	2.019	1	2.023	4	2.023	73	2.019	26	2.011	0	2.011	2	1.987	95	1.987	102	1.987	7
2.027	33	2.027	0	2.027	0	2.027	15	2.023	1	2.027	4	2.027	67	2.023	20	2.015	0	2.015	2	1.991	78	1.991	86	1.991	6
2.031	31	2.031	0	2.031	0	2.031	15	2.027	1	2.031	4	2.031	62	2.027	19	2.019	0	2.019	2	1.995	70	1.995	70	1.995	4
2.035	27	2.035	0	2.035	0	2.035	14	2.031	1	2.035	3	2.035	54	2.031	17	2.023	0	2.023	2	1.999	64	1.999	60	1.999	4
2.039	22	2.039	0	2.039	0	2.039	12	2.035	0	2.039	2	2.039	47	2.035	15	2.027	0	2.027	1	2.003	59	2.003	52	2.003	3
2.043	21	2.043	0	2.043	0	2.043	12	2.039	0	2.043	2	2.043	45	2.039	14	2.031	0	2.031	1	2.007	53	2.007	48	2.007	2
2.047	19	2.047	0	2.047	0	2.047	11	2.043	0	2.047	2	2.047	41	2.043	12	2.035	0	2.035	1	2.011	47	2.011	40	2.011	1
2.051	17	2.051	0	2.051	0	2.051	10	2.047	0	2.051	1	2.051	38	2.047	10	2.039	0	2.039	1	2.015	43	2.015	37	2.015	1
2.055	15	2.055	0	2.055	0	2.055	8	2.051	0	2.055	2	2.055	34	2.051	9	2.043	0	2.043	1	2.019	41	2.019	32	2.019	2
2.059	14	2.059	0	2.059	0	2.059	6	2.055	0	2.059	2	2.059	31	2.055	9	2.047	0	2.047	0	2.023	37	2.023	29	2.023	2
2.063	14	2.063	0	2.063	1	2.063	6	2.059	0	2.063	2	2.063	30	2.059	9	2.051	0	2.051	1	2.027	33	2.027	25	2.027	1
2.067	13	2.067	0	2.067	1	2.067	6	2.063	0	2.067	3	2.067	29	2.063	8	2.055	0	2.055	1	2.031	30	2.031	22	2.031	1
2.071	14	2.071	0	2.071	1	2.071	5	2.067	0	2.071	3	2.071	25	2.067	7	2.059	0	2.059	1	2.035	27	2.035	19	2.035	1
2.075	14	2.075	0	2.075	1	2.075	3	2.071	0	2.075	3	2.075	25	2.071	8	2.063	0	2.063	1	2.039	25	2.039	16	2.039	1
2.079	11	2.079	0	2.079	1	2.079	3	2.075	0	2.079	3	2.079	23	2.075	8	2.067	0	2.067	0	2.043	24	2.043	15	2.043	1
2.083	11	2.083	0	2.083	1	2.083	3	2.079	0	2.083	2	2.083	20	2.079	8	2.072	0	2.071	0	2.047	22	2.047	15	2.047	0
2.087	10	2.087	0	2.087	1	2.087	3	2.083	0	2.087	2	2.087	20	2.083	8	2.075	0	2.075	0	2.051	20	2.051	15	2.051	0
2.091	9	2.091	0	2.091	0	2.091	2	2.087	0	2.091	2	2.091	19	2.087	7	2.079	0	2.079	0	2.055	19	2.055	14	2.055	0
2.095	7	2.095	0	2.095	0	2.095	2	2.091	0	2.095	1	2.095	17	2.091	7	2.083	0	2.083	0	2.059	18	2.059	13	2.059	0
2.099	5	2.099	0	2.099	0	2.099	3	2.095	0	2.099	1	2.099	17	2.095	9	2.087	0	2.087	0	2.063	16	2.063	13	2.063	0
								2.099	0					2.099	10	2.091	0	2.091	0	2.067	14	2.067	11	2.067	0
																2.096	0	2.095	0	2.071	12	2.071	11	2.071	0
																2.1	0	2.099	0	2.075	11	2.075	9	2.075	0
																				2.079	10	2.079	9	2.079	0
																				2.083	8	2.083	10	2.083	0
																				2.087	8	2.087	10	2.087	0
																				2.091	7	2.091	9	2.091	0
																				2.095	7	2.095	10	2.095	0
																				2.099	6	2.099	8	2.099	0

## Sheet: 1,3-dioxolane_101.06
2_17_16_SCAPWT		2_17_17_SCAPADH		2_17_17_mm1		2_17_17_mm2		2_17_17_mm3		2_16_16_SCAM		2_16_16_SC		2_16_16_AM		2_16_16_SCAMLP		2_17_16_SCAPWTLP		2_17_16_SCAP_ADHLPADH		2_18_18_mm1		2_18_18_mm2		2_18_18_mm3		2_18_18_SCAM		2_18_18_SCAP		2_17ajm50p		2_16ajm
3.056	0	3.056	0	3.056	0	3.056	0	3.056	0	3.056	0	3.056	0	3.056	0	3.056	0	3.055	0	3.056	0	3.056	0	3.056	2	3.055	0	3.056	1	3.056	0	3.048	0	3.048	0
3.06	0	3.06	0	3.06	0	3.06	0	3.06	0	3.06	0	3.06	0	3.06	0	3.06	0	3.06	0	3.06	0	3.06	0	3.06	2	3.059	0	3.06	1	3.06	0	3.052	0	3.052	0
3.064	0	3.064	0	3.064	0	3.064	0	3.064	0	3.064	0	3.064	0	3.064	0	3.064	0	3.064	0	3.064	0	3.064	0	3.064	2	3.063	0	3.064	1	3.064	0	3.056	0	3.056	0
3.068	0	3.068	0	3.068	0	3.068	0	3.068	0	3.068	0	3.068	0	3.068	0	3.068	0	3.068	0	3.068	0	3.068	0	3.068	2	3.067	0	3.068	0	3.068	0	3.06	0	3.06	0
3.072	0	3.072	0	3.072	0	3.072	0	3.072	0	3.072	0	3.072	0	3.072	0	3.072	0	3.072	0	3.072	0	3.072	0	3.072	2	3.071	0	3.072	0	3.072	0	3.064	0	3.064	0
3.076	0	3.076	0	3.076	0	3.076	0	3.076	0	3.076	0	3.076	0	3.076	0	3.076	0	3.076	0	3.076	1	3.076	0	3.076	2	3.075	0	3.076	0	3.076	0	3.068	0	3.068	0
3.08	0	3.08	0	3.08	0	3.08	0	3.08	0	3.08	0	3.08	0	3.08	0	3.08	0	3.08	0	3.08	0	3.08	0	3.08	2	3.079	0	3.08	0	3.08	0	3.072	0	3.072	0
3.084	0	3.084	0	3.084	0	3.084	2	3.084	0	3.084	0	3.084	0	3.084	0	3.084	0	3.083	0	3.084	0	3.084	0	3.084	1	3.083	0	3.084	0	3.084	0	3.076	0	3.076	0
3.088	0	3.088	0	3.088	0	3.088	2	3.088	0	3.088	0	3.088	0	3.088	0	3.088	0	3.088	0	3.088	0	3.088	0	3.088	1	3.087	0	3.088	0	3.088	0	3.08	0	3.08	0
3.092	0	3.092	0	3.092	0	3.092	0	3.092	0	3.092	0	3.092	0	3.092	0	3.092	0	3.091	0	3.092	0	3.092	0	3.092	0	3.091	0	3.092	0	3.092	0	3.084	0	3.084	0
3.096	0	3.096	0	3.096	0	3.096	0	3.096	0	3.096	0	3.096	0	3.096	0	3.096	0	3.096	0	3.096	0	3.096	0	3.096	0	3.095	0	3.096	0	3.096	0	3.088	0	3.088	0
3.1	0	3.1	0	3.1	0	3.1	0	3.1	0	3.1	0	3.1	0	3.1	0	3.1	0	3.1	0	3.1	0	3.1	0	3.1	0	3.099	0	3.1	0	3.1	0	3.092	0	3.092	0
3.104	0	3.104	0	3.104	0	3.104	0	3.104	0	3.104	0	3.104	0	3.104	0	3.104	0	3.104	0	3.104	0	3.104	0	3.104	0	3.103	0	3.104	0	3.104	0	3.096	0	3.096	0
3.108	0	3.108	0	3.108	0	3.108	2	3.108	0	3.108	0	3.108	0	3.108	0	3.108	0	3.108	0	3.108	0	3.108	0	3.108	0	3.107	0	3.108	0	3.108	0	3.1	0	3.1	0
3.112	0	3.112	0	3.112	0	3.112	0	3.112	0	3.112	0	3.112	0	3.112	0	3.112	0	3.112	0	3.112	0	3.112	0	3.112	0	3.111	0	3.112	0	3.112	0	3.104	0	3.104	0
3.116	0	3.116	0	3.116	0	3.116	2	3.116	0	3.116	0	3.116	0	3.116	0	3.116	0	3.116	0	3.116	0	3.116	0	3.116	0	3.115	0	3.116	0	3.116	0	3.108	0	3.108	0
3.12	0	3.12	0	3.12	0	3.12	0	3.12	0	3.12	0	3.12	0	3.12	0	3.12	0	3.119	0	3.12	0	3.12	0	3.12	0	3.119	0	3.12	0	3.12	0	3.112	0	3.112	0
3.124	0	3.124	0	3.124	0	3.124	0	3.124	0	3.124	0	3.124	0	3.124	0	3.124	0	3.124	0	3.124	0	3.124	0	3.124	0	3.123	0	3.124	0	3.124	0	3.116	0	3.116	0
3.128	0	3.128	0	3.128	0	3.128	0	3.128	1	3.128	0	3.128	0	3.128	0	3.128	0	3.128	0	3.128	0	3.128	0	3.128	0	3.127	0	3.128	0	3.128	0	3.12	0	3.12	0
3.132	0	3.132	0	3.132	0	3.132	0	3.132	1	3.132	0	3.132	0	3.132	0	3.132	0	3.132	0	3.132	0	3.132	0	3.132	0	3.131	0	3.132	0	3.132	0	3.124	0	3.124	0
3.136	0	3.136	0	3.136	1	3.136	0	3.136	1	3.136	0	3.136	0	3.136	0	3.136	0	3.136	0	3.136	0	3.136	0	3.136	0	3.135	0	3.136	0	3.136	0	3.128	0	3.128	0
3.14	0	3.14	0	3.14	1	3.14	6	3.14	1	3.14	0	3.14	0	3.14	0	3.14	0	3.14	0	3.14	0	3.14	0	3.14	0	3.139	0	3.14	0	3.14	0	3.132	0	3.132	0
3.144	0	3.144	0	3.144	0	3.144	0	3.144	1	3.144	0	3.144	0	3.144	0	3.144	0	3.144	0	3.144	0	3.144	0	3.144	0	3.143	0	3.144	0	3.144	0	3.136	0	3.136	0
3.148	0	3.148	0	3.148	0	3.148	0	3.148	1	3.148	0	3.148	0	3.148	0	3.148	0	3.148	0	3.148	0	3.148	0	3.148	0	3.148	0	3.148	0	3.148	0	3.14	0	3.14	0
3.152	0	3.152	1	3.152	0	3.152	0	3.152	0	3.152	0	3.152	0	3.152	0	3.152	0	3.152	0	3.152	0	3.152	0	3.152	0	3.151	0	3.152	0	3.152	0	3.144	0	3.144	0
3.156	0	3.156	1	3.156	0	3.156	0	3.156	0	3.156	0	3.156	0	3.156	0	3.156	0	3.156	0	3.156	0	3.156	0	3.156	0	3.155	0	3.156	0	3.156	0	3.148	0	3.148	0
3.16	0	3.16	0	3.16	0	3.16	0	3.16	0	3.16	0	3.16	0	3.16	1	3.16	0	3.16	0	3.16	0	3.16	0	3.16	0	3.159	0	3.16	0	3.16	0	3.152	0	3.152	0
3.164	0	3.164	0	3.164	0	3.164	0	3.164	0	3.164	0	3.164	0	3.164	1	3.164	0	3.164	0	3.164	0	3.164	0	3.164	0	3.163	0	3.164	0	3.164	0	3.156	0	3.156	0
3.168	0	3.168	0	3.168	0	3.168	0	3.168	0	3.168	0	3.168	0	3.168	1	3.168	0	3.168	0	3.168	0	3.168	0	3.168	0	3.167	0	3.168	0	3.168	0	3.16	0	3.16	0
3.172	0	3.172	0	3.172	0	3.172	0	3.172	0	3.172	0	3.172	0	3.172	0	3.172	0	3.172	1	3.172	0	3.172	0	3.172	0	3.171	0	3.172	0	3.172	0	3.164	0	3.164	0
3.176	0	3.176	0	3.176	0	3.176	0	3.176	0	3.176	0	3.176	0	3.176	0	3.176	0	3.176	1	3.176	0	3.176	0	3.176	0	3.175	0	3.176	0	3.176	2	3.168	0	3.168	0
3.18	0	3.18	0	3.18	0	3.18	0	3.18	0	3.18	0	3.18	1	3.18	0	3.18	0	3.18	1	3.18	0	3.18	0	3.18	0	3.179	0	3.18	0	3.18	7	3.172	0	3.172	0
3.184	0	3.184	0	3.184	0	3.184	0	3.184	0	3.184	0	3.184	2	3.184	0	3.184	0	3.184	1	3.184	0	3.184	0	3.184	1	3.184	0	3.184	0	3.184	23	3.176	0	3.176	0
3.188	0	3.188	0	3.188	0	3.188	0	3.188	0	3.188	0	3.188	4	3.188	0	3.188	0	3.188	1	3.188	0	3.188	0	3.188	2	3.188	0	3.188	0	3.188	58	3.18	0	3.18	0
3.192	1	3.192	0	3.192	0	3.192	0	3.192	0	3.192	0	3.192	9	3.192	0	3.192	0	3.192	4	3.192	0	3.192	0	3.192	8	3.191	0	3.192	1	3.192	120	3.184	0	3.184	0
3.196	3	3.196	0	3.196	0	3.196	0	3.196	0	3.196	0	3.196	16	3.196	0	3.196	0	3.196	16	3.196	0	3.196	0	3.196	24	3.195	1	3.196	4	3.196	200	3.188	0	3.188	0
3.2	8	3.2	0	3.2	0	3.2	0	3.2	0	3.2	0	3.2	23	3.2	0	3.2	2	3.2	56	3.2	0	3.2	0	3.2	54	3.199	1	3.2	15	3.2	294	3.192	0	3.192	0
3.204	19	3.204	0	3.204	0	3.204	3	3.204	1	3.204	0	3.204	29	3.204	0	3.204	9	3.204	131	3.204	0	3.204	0	3.204	100	3.203	2	3.204	41	3.204	376	3.196	0	3.196	0
3.208	44	3.208	0	3.208	0	3.208	12	3.208	1	3.208	3	3.208	34	3.208	0	3.208	28	3.208	263	3.208	0	3.208	0	3.208	152	3.207	3	3.208	80	3.208	438	3.2	0	3.2	0
3.212	88	3.212	0	3.212	0	3.212	58	3.212	1	3.212	13	3.212	36	3.212	0	3.212	72	3.212	455	3.212	0	3.212	0	3.212	203	3.211	4	3.212	139	3.212	477	3.204	0	3.204	0
3.216	151	3.216	0	3.216	0	3.216	86	3.216	1	3.216	28	3.216	37	3.216	0	3.216	138	3.216	684	3.216	1	3.216	0	3.216	241	3.216	4	3.216	203	3.216	487	3.208	0	3.208	0
3.22	230	3.22	0	3.22	0	3.22	208	3.22	2	3.22	51	3.22	35	3.22	0	3.22	222	3.22	924	3.22	1	3.22	0	3.22	266	3.22	4	3.22	261	3.22	448	3.212	0	3.212	0
3.224	320	3.224	0	3.224	0	3.224	328	3.224	3	3.224	79	3.224	28	3.224	0	3.224	318	3.224	1132	3.224	1	3.224	0	3.224	268	3.224	3	3.224	311	3.224	381	3.216	0	3.216	0
3.228	407	3.228	0	3.228	0	3.228	446	3.228	3	3.228	109	3.228	22	3.228	0	3.228	416	3.228	1279	3.228	1	3.228	0	3.228	249	3.227	3	3.228	341	3.228	294	3.22	0	3.22	0
3.232	476	3.232	0	3.232	0	3.232	572	3.232	3	3.232	137	3.232	16	3.232	0	3.232	506	3.232	1327	3.232	1	3.232	0	3.232	209	3.231	2	3.232	347	3.232	214	3.224	0	3.224	0
3.236	510	3.236	0	3.236	0	3.236	554	3.236	3	3.236	154	3.236	11	3.236	0	3.236	552	3.236	1275	3.236	1	3.236	1	3.236	161	3.235	1	3.236	328	3.236	150	3.228	0	3.228	0
3.24	519	3.24	0	3.24	0	3.24	495	3.24	3	3.24	162	3.24	7	3.24	0	3.24	562	3.24	1134	3.24	2	3.24	1	3.24	112	3.239	0	3.24	283	3.24	97	3.232	0	3.232	0
3.244	486	3.244	0	3.244	0	3.244	417	3.244	3	3.244	159	3.244	4	3.244	0	3.244	528	3.244	936	3.244	2	3.244	1	3.244	74	3.243	0	3.244	229	3.244	54	3.236	0	3.236	0
3.248	421	3.248	1	3.248	0	3.248	289	3.248	3	3.248	143	3.248	2	3.248	0	3.248	462	3.248	712	3.248	2	3.248	1	3.248	44	3.247	0	3.248	175	3.248	31	3.24	0	3.24	0
3.252	343	3.252	1	3.252	0	3.252	157	3.252	3	3.252	120	3.252	1	3.252	0	3.252	375	3.252	501	3.252	1	3.252	1	3.252	27	3.252	0	3.252	125	3.252	19	3.244	0	3.244	0
3.256	258	3.256	1	3.256	0	3.256	96	3.256	2	3.256	92	3.256	1	3.256	0	3.256	281	3.256	322	3.256	1	3.256	1	3.256	16	3.256	0	3.256	87	3.256	13	3.248	0	3.248	0
3.26	180	3.26	1	3.26	0	3.26	55	3.26	1	3.26	65	3.26	1	3.26	0	3.26	187	3.26	205	3.26	1	3.26	1	3.26	9	3.26	0	3.26	56	3.26	9	3.252	0	3.252	0
3.264	122	3.264	1	3.264	0	3.264	34	3.264	1	3.264	46	3.264	1	3.264	0	3.264	124	3.264	126	3.264	1	3.264	0	3.264	6	3.263	0	3.264	36	3.264	5	3.256	0	3.256	0
3.268	71	3.268	1	3.268	0	3.268	21	3.268	1	3.268	29	3.268	1	3.268	0	3.268	70	3.268	77	3.268	1	3.268	0	3.268	3	3.267	0	3.268	22	3.268	4	3.26	0	3.26	0
3.272	42	3.272	1	3.272	0	3.272	11	3.272	1	3.272	17	3.272	0	3.272	0	3.272	41	3.272	46	3.272	0	3.272	0	3.272	1	3.271	0	3.272	13	3.272	3	3.264	0	3.264	0
3.276	27	3.276	0	3.276	0	3.276	8	3.276	0	3.276	9	3.276	0	3.276	0	3.276	23	3.276	28	3.276	0	3.276	0	3.276	1	3.275	0	3.276	8	3.276	2	3.268	0	3.268	0
3.28	14	3.28	0	3.28	0	3.28	2	3.28	0	3.28	6	3.28	0	3.28	0	3.28	15	3.28	19	3.28	1	3.28	0	3.28	0	3.279	0	3.28	6	3.28	1	3.272	0	3.272	0
3.284	8	3.284	0	3.284	0	3.284	4	3.284	0	3.284	4	3.284	0	3.284	0	3.284	9	3.284	12	3.284	1	3.284	0	3.284	0	3.283	0	3.284	4	3.284	1	3.276	0	3.276	0
3.288	6	3.288	0	3.288	0	3.288	3	3.288	0	3.288	3	3.288	0	3.288	0	3.288	7	3.288	6	3.288	1	3.288	0	3.288	0	3.287	0	3.288	3	3.288	0	3.28	0	3.28	0
3.292	5	3.292	0	3.292	0	3.292	2	3.292	0	3.292	2	3.292	0	3.292	0	3.292	6	3.292	5	3.292	0	3.292	0	3.292	0	3.292	0	3.292	2	3.292	1	3.284	0	3.284	0
3.296	4	3.296	0	3.296	0	3.296	4	3.296	0	3.296	1	3.296	0	3.296	0	3.296	4	3.296	4	3.296	0	3.296	0	3.296	0	3.296	0	3.296	2	3.296	0	3.288	0	3.288	0
3.3	3	3.3	0	3.3	0	3.3	0	3.3	0	3.3	1	3.3	0	3.3	0	3.3	3	3.3	3	3.3	0	3.3	0	3.3	0	3.3	0	3.3	2	3.3	1	3.292	0	3.292	0
3.304	3	3.304	0	3.304	0	3.304	0	3.304	0	3.304	1	3.304	0	3.304	0	3.304	1	3.304	3	3.304	0	3.304	0	3.304	0	3.303	0	3.304	2	3.304	1	3.296	0	3.296	0
3.308	2	3.308	0	3.308	0	3.308	0	3.308	0	3.308	1	3.308	0	3.308	0	3.308	1	3.308	2	3.308	0	3.308	0	3.308	0	3.307	0	3.308	1	3.308	1	3.3	0	3.3	0
3.312	2	3.312	0	3.312	0	3.312	0	3.312	0	3.312	1	3.312	0	3.312	0	3.312	1	3.312	2	3.312	0	3.312	0	3.312	0	3.311	0	3.312	1	3.312	1	3.304	0	3.304	0
3.316	2	3.316	0	3.316	0	3.316	2	3.316	0	3.316	0	3.316	0	3.316	0	3.316	1	3.316	2	3.316	0	3.316	0	3.316	0	3.315	0	3.316	1	3.316	1	3.308	0	3.308	0
3.32	1	3.32	0	3.32	0	3.32	0	3.32	0	3.32	0	3.32	0	3.32	0	3.32	1	3.32	1	3.32	0	3.32	0	3.32	0	3.319	0	3.32	1	3.32	1	3.312	0	3.312	0
3.324	1	3.324	0	3.324	0	3.324	4	3.324	0	3.324	0	3.324	0	3.324	0	3.324	1	3.324	1	3.324	0	3.324	0	3.324	0	3.324	0	3.324	0	3.324	1	3.316	0	3.316	0
3.328	0	3.328	0	3.328	0	3.328	0	3.328	0	3.328	0	3.328	0	3.328	0	3.328	1	3.328	1	3.328	0	3.328	0	3.328	0	3.328	0	3.328	1	3.328	1	3.32	0	3.32	0
3.332	0	3.332	1	3.332	0	3.332	0	3.332	0	3.332	0	3.332	0	3.332	0	3.332	1	3.332	1	3.332	0	3.332	0	3.332	0	3.332	0	3.332	0	3.332	1	3.324	0	3.324	0
3.336	0	3.336	1	3.336	0	3.336	2	3.336	0	3.336	0	3.336	0	3.336	0	3.336	0	3.336	1	3.336	0	3.336	0	3.336	0	3.336	0	3.336	0	3.336	0	3.328	0	3.328	0
3.34	0	3.34	1	3.34	0	3.34	0	3.34	0	3.34	0	3.34	0	3.34	0	3.34	0	3.34	1	3.34	0	3.34	0	3.34	0	3.339	0	3.34	0	3.34	0	3.332	0	3.332	0
3.344	0	3.344	1	3.344	0	3.344	0	3.344	0	3.344	0	3.344	0	3.344	0	3.344	0	3.344	1	3.344	0	3.344	0	3.344	0	3.343	0	3.344	0	3.344	0	3.336	1	3.336	0
3.348	0	3.348	1	3.348	0	3.348	0	3.348	0	3.348	0	3.348	0	3.348	0	3.348	0	3.348	1	3.348	0	3.348	0	3.348	0	3.347	0	3.348	0	3.348	0	3.34	1	3.34	0
																																3.344	0	3.344	0
																																3.348	0	3.348	0

## Sheet: acetal_103.07
2_16_16_SC		2_16_16_AM		2_16_16_SCAM		2_16_16_SCAMLP		2_16_16_AJM		2_17_16_SCAPWT		2_17_16_SCAPADH		2_17_16_SCAPLPWT		2_17_16_SCAPLPADH		2_17_16_mm1		2_17_16_mm2		2_17_16_mm3		2_17_16_AJM50p		2_18_16_mm1		2_18_16_mm2		2_18_16_mm3
3.008	0	3.008	0	3.008	1	3.008	2	3.008	0	3.008	1	3.008	0	3.007	2	3.008	1	3.008	2	3.008	2	3.008	1	3.008	0	3.008	2	3.008	1	3.007	0
3.012	0	3.012	0	3.012	1	3.012	2	3.012	0	3.012	1	3.012	0	3.011	3	3.012	1	3.012	2	3.012	2	3.012	0	3.012	1	3.012	2	3.012	1	3.011	0
3.016	0	3.016	0	3.016	1	3.016	3	3.016	0	3.016	1	3.016	0	3.015	2	3.016	1	3.016	2	3.016	2	3.016	1	3.016	1	3.016	2	3.016	1	3.015	0
3.02	0	3.02	1	3.02	0	3.02	2	3.02	0	3.02	1	3.02	0	3.019	2	3.02	1	3.02	1	3.02	2	3.02	1	3.02	1	3.02	1	3.02	1	3.019	0
3.024	0	3.024	1	3.024	0	3.024	2	3.024	0	3.024	1	3.024	0	3.023	2	3.024	1	3.024	1	3.024	2	3.024	1	3.024	1	3.024	2	3.024	1	3.023	0
3.028	0	3.028	1	3.028	1	3.028	2	3.028	0	3.028	1	3.028	0	3.028	1	3.028	1	3.028	1	3.028	2	3.028	1	3.028	1	3.028	1	3.028	0	3.027	0
3.032	0	3.032	1	3.032	1	3.032	2	3.032	1	3.032	1	3.032	1	3.032	1	3.032	1	3.032	0	3.032	2	3.032	1	3.032	0	3.032	1	3.032	1	3.031	0
3.036	0	3.036	1	3.036	0	3.036	2	3.036	1	3.036	1	3.036	1	3.036	1	3.036	1	3.036	0	3.036	2	3.036	2	3.036	0	3.036	1	3.036	1	3.035	0
3.04	0	3.04	1	3.04	0	3.04	2	3.04	1	3.04	0	3.04	1	3.04	1	3.04	1	3.04	1	3.04	2	3.04	2	3.04	0	3.04	1	3.04	1	3.039	0
3.044	0	3.044	1	3.044	0	3.044	2	3.044	1	3.044	1	3.044	1	3.044	1	3.044	1	3.044	1	3.044	2	3.044	1	3.044	0	3.044	0	3.044	0	3.043	0
3.048	0	3.048	0	3.048	0	3.048	2	3.048	1	3.048	0	3.048	1	3.047	1	3.048	1	3.048	1	3.048	2	3.048	1	3.048	0	3.048	0	3.048	0	3.047	0
3.052	0	3.052	0	3.052	0	3.052	2	3.052	1	3.052	0	3.052	1	3.051	1	3.052	1	3.052	1	3.052	1	3.052	1	3.052	0	3.052	0	3.052	0	3.051	0
3.056	0	3.056	0	3.056	0	3.056	2	3.056	2	3.056	0	3.056	1	3.055	2	3.056	1	3.056	1	3.056	1	3.056	1	3.056	1	3.056	0	3.056	0	3.055	0
3.06	0	3.06	0	3.06	0	3.06	1	3.06	1	3.06	1	3.06	0	3.06	2	3.06	1	3.06	1	3.06	1	3.06	1	3.06	1	3.06	0	3.06	0	3.059	0
3.064	0	3.064	0	3.064	0	3.064	1	3.064	1	3.064	1	3.064	0	3.064	1	3.064	1	3.064	1	3.064	1	3.064	1	3.064	1	3.064	0	3.064	0	3.063	0
3.068	0	3.068	0	3.068	0	3.068	1	3.068	1	3.068	1	3.068	0	3.068	1	3.068	1	3.068	1	3.068	1	3.068	1	3.068	1	3.068	1	3.068	0	3.067	0
3.072	0	3.072	1	3.072	0	3.072	1	3.072	0	3.072	1	3.072	1	3.072	1	3.072	1	3.072	0	3.072	1	3.072	1	3.072	1	3.072	1	3.072	0	3.071	0
3.076	0	3.076	1	3.076	0	3.076	1	3.076	0	3.076	1	3.076	1	3.076	1	3.076	1	3.076	0	3.076	1	3.076	1	3.076	1	3.076	1	3.076	0	3.075	0
3.08	0	3.08	1	3.08	0	3.08	1	3.08	1	3.08	1	3.08	1	3.08	1	3.08	1	3.08	0	3.08	1	3.08	1	3.08	1	3.08	1	3.08	0	3.079	0
3.084	0	3.084	1	3.084	0	3.084	1	3.084	1	3.084	2	3.084	1	3.083	1	3.084	1	3.084	0	3.084	1	3.084	1	3.084	1	3.084	0	3.084	0	3.083	0
3.088	0	3.088	1	3.088	0	3.088	2	3.088	1	3.088	1	3.088	1	3.088	1	3.088	1	3.088	0	3.088	1	3.088	1	3.088	1	3.088	1	3.088	0	3.087	0
3.092	0	3.092	1	3.092	0	3.092	2	3.092	1	3.092	2	3.092	0	3.091	1	3.092	0	3.092	0	3.092	0	3.092	1	3.092	1	3.092	1	3.092	0	3.091	0
3.096	0	3.096	1	3.096	0	3.096	2	3.096	1	3.096	1	3.096	0	3.096	1	3.096	0	3.096	0	3.096	1	3.096	2	3.096	1	3.096	1	3.096	0	3.095	0
3.1	0	3.1	0	3.1	0	3.1	3	3.1	1	3.1	2	3.1	0	3.1	1	3.1	0	3.1	0	3.1	0	3.1	2	3.1	1	3.1	1	3.1	0	3.099	0
3.104	0	3.104	1	3.104	0	3.104	3	3.104	1	3.104	2	3.104	0	3.104	1	3.104	0	3.104	0	3.104	1	3.104	2	3.104	1	3.104	1	3.104	0	3.103	0
3.108	0	3.108	1	3.108	0	3.108	2	3.108	0	3.108	1	3.108	0	3.108	1	3.108	0	3.108	0	3.108	1	3.108	2	3.108	1	3.108	1	3.108	0	3.107	0
3.112	0	3.112	1	3.112	0	3.112	2	3.112	0	3.112	1	3.112	0	3.112	1	3.112	0	3.112	1	3.112	1	3.112	3	3.112	1	3.112	1	3.112	0	3.111	0
3.116	0	3.116	1	3.116	0	3.116	2	3.116	0	3.116	1	3.116	0	3.116	1	3.116	1	3.116	1	3.116	1	3.116	2	3.116	1	3.116	0	3.116	0	3.115	0
3.12	0	3.12	1	3.12	0	3.12	2	3.12	0	3.12	1	3.12	0	3.119	1	3.12	1	3.12	1	3.12	1	3.12	2	3.12	1	3.12	0	3.12	0	3.119	0
3.124	0	3.124	1	3.124	0	3.124	1	3.124	0	3.124	1	3.124	0	3.124	1	3.124	1	3.124	1	3.124	1	3.124	2	3.124	1	3.124	0	3.124	0	3.123	0
3.128	0	3.128	1	3.128	0	3.128	1	3.128	0	3.128	1	3.128	0	3.128	1	3.128	1	3.128	1	3.128	1	3.128	2	3.128	0	3.128	0	3.128	0	3.127	0
3.132	0	3.132	0	3.132	0	3.132	1	3.132	0	3.132	1	3.132	0	3.132	1	3.132	1	3.132	1	3.132	1	3.132	1	3.132	0	3.132	0	3.132	0	3.131	0
3.136	0	3.136	0	3.136	1	3.136	1	3.136	0	3.136	1	3.136	0	3.136	1	3.136	1	3.136	1	3.136	1	3.136	1	3.136	0	3.136	0	3.136	0	3.135	0
3.14	0	3.14	0	3.14	1	3.14	2	3.14	0	3.14	0	3.14	0	3.14	1	3.14	1	3.14	0	3.14	1	3.14	1	3.14	1	3.14	0	3.14	0	3.139	0
3.144	0	3.144	1	3.144	1	3.144	2	3.144	0	3.144	0	3.144	0	3.144	1	3.144	1	3.144	0	3.144	1	3.144	0	3.144	1	3.144	0	3.144	0	3.143	0
3.148	0	3.148	1	3.148	1	3.148	1	3.148	0	3.148	0	3.148	0	3.148	1	3.148	1	3.148	0	3.148	1	3.148	1	3.148	1	3.148	0	3.148	0	3.148	0
3.152	1	3.152	1	3.152	1	3.152	1	3.152	0	3.152	0	3.152	0	3.152	1	3.152	1	3.152	0	3.152	1	3.152	1	3.152	1	3.152	1	3.152	0	3.151	0
3.156	1	3.156	1	3.156	1	3.156	1	3.156	0	3.156	0	3.156	0	3.156	1	3.156	1	3.156	0	3.156	0	3.156	1	3.156	1	3.156	1	3.156	0	3.155	0
3.16	1	3.16	1	3.16	1	3.16	1	3.16	0	3.16	1	3.16	0	3.16	1	3.16	2	3.16	0	3.16	0	3.16	1	3.16	1	3.16	1	3.16	0	3.159	0
3.164	1	3.164	1	3.164	1	3.164	1	3.164	0	3.164	1	3.164	0	3.164	1	3.164	1	3.164	0	3.164	0	3.164	1	3.164	1	3.164	1	3.164	0	3.163	0
3.168	1	3.168	1	3.168	1	3.168	0	3.168	0	3.168	1	3.168	0	3.168	1	3.168	1	3.168	0	3.168	0	3.168	1	3.168	0	3.168	1	3.168	0	3.167	0
3.172	1	3.172	1	3.172	1	3.172	0	3.172	0	3.172	1	3.172	0	3.172	1	3.172	1	3.172	0	3.172	0	3.172	1	3.172	0	3.172	1	3.172	0	3.171	0
3.176	1	3.176	0	3.176	1	3.176	0	3.176	0	3.176	1	3.176	0	3.176	1	3.176	1	3.176	0	3.176	0	3.176	1	3.176	0	3.176	1	3.176	0	3.175	0
3.18	1	3.18	0	3.18	1	3.18	0	3.18	0	3.18	1	3.18	0	3.18	0	3.18	0	3.18	0	3.18	0	3.18	1	3.18	0	3.18	1	3.18	0	3.179	0
3.184	1	3.184	1	3.184	0	3.184	0	3.184	0	3.184	1	3.184	0	3.184	0	3.184	0	3.184	1	3.184	0	3.184	0	3.184	0	3.184	1	3.184	0	3.184	0
3.188	1	3.188	1	3.188	0	3.188	1	3.188	0	3.188	1	3.188	0	3.188	0	3.188	1	3.188	0	3.188	0	3.188	1	3.188	0	3.188	1	3.188	0	3.188	0
3.192	2	3.192	1	3.192	0	3.192	1	3.192	0	3.192	1	3.192	0	3.192	1	3.192	1	3.192	0	3.192	0	3.192	0	3.192	0	3.192	1	3.192	0	3.191	1
3.196	3	3.196	1	3.196	0	3.196	1	3.196	0	3.196	0	3.196	0	3.196	1	3.196	1	3.196	0	3.196	1	3.196	1	3.196	0	3.196	1	3.196	0	3.195	3
3.2	5	3.2	1	3.2	0	3.2	1	3.2	0	3.2	0	3.2	0	3.2	1	3.2	1	3.2	0	3.2	0	3.2	1	3.2	0	3.2	0	3.2	1	3.199	7
3.204	9	3.204	1	3.204	1	3.204	1	3.204	0	3.204	0	3.204	1	3.204	2	3.204	1	3.204	0	3.204	0	3.204	1	3.204	0	3.204	0	3.204	5	3.203	18
3.208	14	3.208	1	3.208	1	3.208	1	3.208	1	3.208	0	3.208	1	3.208	3	3.208	1	3.208	0	3.208	1	3.208	1	3.208	0	3.208	0	3.208	20	3.207	37
3.212	20	3.212	1	3.212	1	3.212	1	3.212	1	3.212	0	3.212	1	3.212	6	3.212	1	3.212	0	3.212	1	3.212	1	3.212	0	3.212	0	3.212	50	3.211	65
3.216	29	3.216	0	3.216	1	3.216	1	3.216	0	3.216	0	3.216	1	3.216	8	3.216	1	3.216	0	3.216	3	3.216	1	3.216	1	3.216	0	3.216	113	3.216	97
3.22	35	3.22	0	3.22	1	3.22	2	3.22	0	3.22	1	3.22	1	3.22	10	3.22	1	3.22	1	3.22	5	3.22	1	3.22	1	3.22	2	3.22	205	3.22	138
3.224	42	3.224	0	3.224	2	3.224	2	3.224	0	3.224	2	3.224	1	3.224	12	3.224	1	3.224	1	3.224	7	3.224	1	3.224	1	3.224	6	3.224	313	3.224	181
3.228	47	3.228	0	3.228	2	3.228	3	3.228	0	3.228	3	3.228	0	3.228	13	3.228	1	3.228	1	3.228	11	3.228	2	3.228	1	3.228	20	3.228	428	3.227	221
3.232	48	3.232	0	3.232	2	3.232	3	3.232	0	3.232	3	3.232	1	3.232	14	3.232	3	3.232	1	3.232	18	3.232	3	3.232	1	3.232	39	3.232	525	3.231	249
3.236	46	3.236	0	3.236	2	3.236	3	3.236	0	3.236	4	3.236	1	3.236	13	3.236	4	3.236	2	3.236	28	3.236	5	3.236	1	3.236	68	3.236	589	3.235	255
3.24	43	3.24	0	3.24	1	3.24	4	3.24	0	3.24	4	3.24	2	3.24	11	3.24	9	3.24	3	3.24	37	3.24	7	3.24	1	3.24	107	3.24	616	3.239	246
3.244	34	3.244	0	3.244	2	3.244	4	3.244	0	3.244	4	3.244	3	3.244	9	3.244	13	3.244	4	3.244	51	3.244	9	3.244	1	3.244	142	3.244	592	3.243	227
3.248	28	3.248	0	3.248	2	3.248	4	3.248	0	3.248	5	3.248	3	3.248	6	3.248	16	3.248	5	3.248	61	3.248	12	3.248	1	3.248	169	3.248	518	3.247	193
3.252	20	3.252	0	3.252	2	3.252	4	3.252	0	3.252	4	3.252	4	3.252	4	3.252	21	3.252	6	3.252	67	3.252	15	3.252	1	3.252	186	3.252	422	3.252	154
3.256	14	3.256	0	3.256	2	3.256	3	3.256	0	3.256	3	3.256	5	3.256	2	3.256	23	3.256	6	3.256	69	3.256	15	3.256	1	3.256	184	3.256	316	3.256	111
3.26	8	3.26	0	3.26	2	3.26	2	3.26	0	3.26	3	3.26	5	3.26	1	3.26	24	3.26	6	3.26	68	3.26	14	3.26	1	3.26	175	3.26	222	3.26	73
3.264	5	3.264	0	3.264	2	3.264	2	3.264	0	3.264	3	3.264	6	3.264	0	3.264	24	3.264	6	3.264	62	3.264	13	3.264	1	3.264	152	3.264	146	3.263	48
3.268	4	3.268	0	3.268	2	3.268	1	3.268	0	3.268	3	3.268	5	3.268	0	3.268	19	3.268	5	3.268	55	3.268	11	3.268	1	3.268	115	3.268	91	3.267	30
3.272	3	3.272	0	3.272	2	3.272	0	3.272	0	3.272	2	3.272	4	3.272	0	3.272	16	3.272	3	3.272	40	3.272	9	3.272	1	3.272	84	3.272	53	3.271	18
3.276	2	3.276	0	3.276	2	3.276	0	3.276	0	3.276	2	3.276	4	3.276	1	3.276	14	3.276	2	3.276	30	3.276	6	3.276	0	3.276	56	3.276	36	3.275	10
3.28	2	3.28	0	3.28	1	3.28	0	3.28	0	3.28	1	3.28	4	3.28	1	3.28	9	3.28	1	3.28	22	3.28	3	3.28	0	3.28	36	3.28	25	3.279	5
3.284	1	3.284	0	3.284	1	3.284	0	3.284	0	3.284	1	3.284	3	3.284	1	3.284	7	3.284	1	3.284	16	3.284	2	3.284	0	3.284	25	3.284	16	3.283	4
3.288	1	3.288	0	3.288	1	3.288	0	3.288	0	3.288	1	3.288	2	3.288	1	3.288	5	3.288	1	3.288	10	3.288	2	3.288	1	3.288	16	3.288	10	3.287	3
3.292	0	3.292	0	3.292	1	3.292	0	3.292	0	3.292	1	3.292	2	3.292	1	3.292	4	3.292	0	3.292	5	3.292	2	3.292	0	3.292	11	3.292	7	3.292	3
3.296	0	3.296	0	3.296	1	3.296	0	3.296	0	3.296	0	3.296	2	3.296	1	3.296	4	3.296	0	3.296	3	3.296	1	3.296	0	3.296	7	3.296	5	3.296	2
3.3	0	3.3	0	3.3	1	3.3	1	3.3	0	3.3	0	3.3	2	3.3	1	3.3	4	3.3	0	3.3	3	3.3	1	3.3	0	3.3	4	3.3	3	3.3	1
3.304	0	3.304	0	3.304	0	3.304	1	3.304	0	3.304	0	3.304	2	3.304	1	3.304	3	3.304	0	3.304	1	3.304	1	3.304	0	3.304	3	3.304	3	3.303	1
3.308	0	3.308	0	3.308	0	3.308	1	3.308	0	3.308	1	3.308	1	3.308	1	3.308	3	3.308	0	3.308	1	3.308	1	3.308	0	3.308	2	3.308	2	3.307	1
3.312	0	3.312	0	3.312	0	3.312	1	3.312	0	3.312	1	3.312	1	3.312	1	3.312	3	3.312	0	3.312	0	3.312	1	3.312	1	3.312	1	3.312	1	3.311	0
3.316	0	3.316	1	3.316	0	3.316	1	3.316	0	3.316	1	3.316	1	3.316	1	3.316	3	3.316	0	3.316	0	3.316	1	3.316	0	3.316	1	3.316	1	3.315	0
3.32	0	3.32	1	3.32	0	3.32	1	3.32	0	3.32	1	3.32	0	3.32	1	3.32	2	3.32	0	3.32	0	3.32	1	3.32	1	3.32	1	3.32	1	3.319	0
3.324	0	3.324	1	3.324	0	3.324	1	3.324	0	3.324	1	3.324	0	3.324	1	3.324	2	3.324	0	3.324	0	3.324	1	3.324	1	3.324	0	3.324	1	3.324	0
3.328	0	3.328	1	3.328	0	3.328	1	3.328	0	3.328	1	3.328	0	3.328	1	3.328	1	3.328	0	3.328	0	3.328	1	3.328	1	3.328	0	3.328	1	3.328	0
3.332	0	3.332	1	3.332	0	3.332	1	3.332	0	3.332	0	3.332	0	3.332	1	3.332	2	3.332	0	3.332	0	3.332	1	3.332	1	3.332	0	3.332	0	3.332	0
3.336	0	3.336	0	3.336	1	3.336	1	3.336	0	3.336	0	3.336	0	3.336	1	3.336	2	3.336	0	3.336	0	3.336	2	3.336	1	3.336	0	3.336	0	3.336	0
3.34	0	3.34	0	3.34	1	3.34	1	3.34	0	3.34	0	3.34	0	3.34	1	3.34	2	3.34	0	3.34	1	3.34	1	3.34	1	3.34	0	3.34	0	3.339	0
3.344	0	3.344	0	3.344	1	3.344	1	3.344	0	3.344	0	3.344	0	3.344	1	3.344	1	3.344	0	3.344	1	3.344	1	3.344	1	3.344	0	3.344	1	3.343	0
3.348	0	3.348	0	3.348	0	3.348	0	3.348	0	3.348	0	3.348	0	3.348	1	3.348	1	3.348	0	3.348	1	3.348	1	3.348	0	3.348	0	3.348	1	3.347	0
3.352	0	3.352	0	3.352	0	3.352	0	3.352	0	3.352	0	3.352	0	3.352	1	3.352	1	3.352	0	3.352	1	3.352	1	3.352	0	3.352	0	3.352	1	3.351	0
3.356	0	3.356	0	3.356	0	3.356	0	3.356	0	3.356	0	3.356	0	3.356	1	3.356	1	3.356	0	3.356	1	3.356	0	3.356	0	3.356	0	3.356	1	3.355	1
3.36	0	3.36	0	3.36	0	3.36	0	3.36	0	3.36	0	3.36	1	3.36	1	3.36	1	3.36	0	3.36	1	3.36	1	3.36	0	3.36	0	3.36	1	3.36	1
3.364	0	3.364	0	3.364	0	3.364	0	3.364	0	3.364	0	3.364	1	3.364	1	3.364	1	3.364	0	3.364	1	3.364	0	3.364	0	3.364	0	3.364	1	3.364	2
3.368	0	3.368	0	3.368	0	3.368	0	3.368	1	3.368	1	3.368	1	3.368	1	3.368	1	3.368	0	3.368	0	3.368	0	3.368	0	3.368	0	3.368	1	3.368	2
3.372	0	3.372	0	3.372	0	3.372	0	3.372	1	3.372	1	3.372	1	3.372	1	3.372	2	3.372	0	3.372	0	3.372	0	3.372	0	3.372	0	3.372	1	3.372	2
3.376	0	3.376	0	3.376	0	3.376	0	3.376	1	3.376	1	3.376	1	3.376	1	3.376	2	3.376	0	3.376	0	3.376	1	3.376	1	3.376	0	3.376	1	3.376	2
3.38	0	3.38	0	3.38	0	3.38	1	3.38	1	3.38	1	3.38	1	3.38	1	3.38	2	3.38	0	3.38	1	3.38	1	3.38	1	3.38	0	3.38	1	3.379	3
3.384	0	3.384	0	3.384	1	3.384	1	3.384	1	3.384	1	3.384	1	3.384	1	3.384	2	3.384	0	3.384	1	3.384	1	3.384	1	3.384	0	3.384	2	3.383	3
3.388	0	3.388	0	3.388	1	3.388	1	3.388	1	3.388	1	3.388	1	3.388	1	3.388	1	3.388	1	3.388	1	3.388	1	3.388	1	3.388	1	3.388	2	3.387	3
3.392	0	3.392	0	3.392	1	3.392	1	3.392	0	3.392	1	3.392	0	3.392	1	3.392	1	3.392	1	3.392	1	3.392	1	3.392	1	3.392	1	3.392	3	3.391	2
3.396	0	3.396	0	3.396	1	3.396	1	3.396	0	3.396	1	3.396	0	3.396	1	3.396	1	3.396	1	3.396	1	3.396	1	3.396	1	3.396	1	3.396	3	3.396	2
3.4	0	3.4	0	3.4	1	3.4	1	3.4	0	3.4	1	3.4	0	3.4	1	3.4	0	3.4	1	3.4	1	3.4	2	3.4	1	3.4	1	3.4	3	3.4	2

## Sheet: isobutylacetaet_73.03
2_16_16_SCAM		2_16_16_SC		2_16_16_AM		2_16_16_AJM		2_16_16_SCAMLP		2_17_16_SCAPWT		2_17_16_SCAPADH		2_17_16_mm1		2_17_16_mm2		2_17_16_mm3		2_17_16_SCAPLPWT		2_17_16_SCAPLPADH		2_17ajm50p
4.144	49	4.144	3	4.144	46	4.144	8	4.144	110	4.144	41	4.145	15	4.144	9	4.144	19	4.144	18	4.144	60	4.144	51	4.12	16
4.148	44	4.148	3	4.148	44	4.148	7	4.148	105	4.148	42	4.149	14	4.148	9	4.148	24	4.148	18	4.148	60	4.148	50	4.124	17
4.152	42	4.152	3	4.152	44	4.152	7	4.152	102	4.152	41	4.153	13	4.152	9	4.152	28	4.152	18	4.152	60	4.152	50	4.128	16
4.156	41	4.156	3	4.156	44	4.156	6	4.156	101	4.156	41	4.157	14	4.156	9	4.156	32	4.156	18	4.156	60	4.156	53	4.132	16
4.16	40	4.161	2	4.16	44	4.16	5	4.16	104	4.16	38	4.161	11	4.16	9	4.16	37	4.16	17	4.16	58	4.16	55	4.136	16
4.164	40	4.165	2	4.164	44	4.164	4	4.164	103	4.164	38	4.165	12	4.164	9	4.164	37	4.164	16	4.164	57	4.164	55	4.14	16
4.168	36	4.169	2	4.168	45	4.168	5	4.168	103	4.168	37	4.169	13	4.168	10	4.168	39	4.168	17	4.168	56	4.168	54	4.144	16
4.172	37	4.173	3	4.172	45	4.172	5	4.172	101	4.172	36	4.173	14	4.172	9	4.172	39	4.172	15	4.172	56	4.172	59	4.148	16
4.176	39	4.177	3	4.176	45	4.176	5	4.176	102	4.176	36	4.177	13	4.177	9	4.176	36	4.176	13	4.176	56	4.176	60	4.152	15
4.18	38	4.181	3	4.18	44	4.18	6	4.18	99	4.18	34	4.181	14	4.181	9	4.18	32	4.18	13	4.18	55	4.18	60	4.156	14
4.184	37	4.184	3	4.184	45	4.185	7	4.184	99	4.184	33	4.185	15	4.185	9	4.184	29	4.184	13	4.184	54	4.184	57	4.16	15
4.188	35	4.188	3	4.188	42	4.188	6	4.188	96	4.188	33	4.189	16	4.188	9	4.188	25	4.188	13	4.188	57	4.188	52	4.164	15
4.192	36	4.193	2	4.192	43	4.192	6	4.192	93	4.192	36	4.193	16	4.192	9	4.192	21	4.192	14	4.192	57	4.192	53	4.168	15
4.196	37	4.197	2	4.196	42	4.196	7	4.196	90	4.196	36	4.197	16	4.196	9	4.196	17	4.196	14	4.196	59	4.196	51	4.172	15
4.2	36	4.201	2	4.2	42	4.2	7	4.2	89	4.2	35	4.201	15	4.201	10	4.2	15	4.2	15	4.2	57	4.2	49	4.176	14
4.204	35	4.205	2	4.204	42	4.204	5	4.204	84	4.204	35	4.205	15	4.205	9	4.204	14	4.204	16	4.204	56	4.204	49	4.18	14
4.208	36	4.209	2	4.208	40	4.209	6	4.208	84	4.208	37	4.209	15	4.209	8	4.208	14	4.208	17	4.208	57	4.208	47	4.184	14
4.212	36	4.213	1	4.212	37	4.213	7	4.212	82	4.212	37	4.213	17	4.213	9	4.212	15	4.212	17	4.212	58	4.212	49	4.188	14
4.216	37	4.216	1	4.216	38	4.217	7	4.216	81	4.216	38	4.217	17	4.217	10	4.216	14	4.216	18	4.216	58	4.216	52	4.192	14
4.22	35	4.221	2	4.22	37	4.22	6	4.22	78	4.22	35	4.221	16	4.22	10	4.22	14	4.22	19	4.22	59	4.22	53	4.196	13
4.224	34	4.225	2	4.224	36	4.224	5	4.224	77	4.224	34	4.225	15	4.225	9	4.224	14	4.224	17	4.224	59	4.224	53	4.2	12
4.228	34	4.229	2	4.228	35	4.228	6	4.228	75	4.228	37	4.229	16	4.229	10	4.228	14	4.228	16	4.228	57	4.228	51	4.204	13
4.232	33	4.233	2	4.232	34	4.232	7	4.232	78	4.232	35	4.233	15	4.233	11	4.232	13	4.232	16	4.232	56	4.232	51	4.208	14
4.236	34	4.237	2	4.236	36	4.237	6	4.236	74	4.236	33	4.237	15	4.237	10	4.236	11	4.236	16	4.236	54	4.236	52	4.212	14
4.24	36	4.241	2	4.24	36	4.241	5	4.24	76	4.24	33	4.241	14	4.241	9	4.24	11	4.24	16	4.24	53	4.24	50	4.216	15
4.244	36	4.245	2	4.244	36	4.245	6	4.244	75	4.244	32	4.245	14	4.245	8	4.244	11	4.244	16	4.244	52	4.244	48	4.22	15
4.248	38	4.249	1	4.248	36	4.249	6	4.248	75	4.248	32	4.249	15	4.249	8	4.248	11	4.248	16	4.248	53	4.248	45	4.224	15
4.252	39	4.253	2	4.252	35	4.253	7	4.252	73	4.252	33	4.253	15	4.253	7	4.252	11	4.252	16	4.252	53	4.252	46	4.228	15
4.256	39	4.257	2	4.256	35	4.256	7	4.256	69	4.256	31	4.257	14	4.257	7	4.256	12	4.256	16	4.256	54	4.256	47	4.232	15
4.26	40	4.261	3	4.26	35	4.261	6	4.26	66	4.26	30	4.261	14	4.261	7	4.26	13	4.26	16	4.26	53	4.26	45	4.236	14
4.264	38	4.265	3	4.264	34	4.265	6	4.264	69	4.264	30	4.265	14	4.265	17	4.264	14	4.265	17	4.264	57	4.264	45	4.24	14
4.268	37	4.269	3	4.268	35	4.269	6	4.268	67	4.268	30	4.269	14	4.269	65	4.268	16	4.268	18	4.268	69	4.268	46	4.244	13
4.272	39	4.273	4	4.272	33	4.273	7	4.272	77	4.272	31	4.273	14	4.273	199	4.272	28	4.272	22	4.272	111	4.272	48	4.248	14
4.276	67	4.277	4	4.276	36	4.277	7	4.276	112	4.276	32	4.277	14	4.277	492	4.276	66	4.276	36	4.276	211	4.276	49	4.253	14
4.28	141	4.281	3	4.28	37	4.281	6	4.28	201	4.28	34	4.281	14	4.281	1214	4.28	145	4.28	68	4.28	402	4.28	48	4.256	13
4.284	296	4.285	4	4.284	38	4.285	5	4.284	402	4.284	38	4.285	15	4.285	2373	4.284	291	4.284	123	4.284	723	4.284	47	4.26	12
4.288	585	4.289	3	4.288	39	4.289	6	4.288	723	4.288	52	4.289	15	4.289	3875	4.288	496	4.288	201	4.288	1359	4.288	50	4.264	12
4.292	1069	4.293	3	4.292	39	4.293	7	4.292	1405	4.292	77	4.293	14	4.293	5672	4.292	780	4.292	305	4.292	2108	4.292	53	4.268	12
4.296	1740	4.297	2	4.296	38	4.297	7	4.296	2275	4.296	111	4.297	16	4.297	7604	4.296	1111	4.296	420	4.296	2981	4.296	54	4.272	12
4.3	2431	4.301	3	4.3	40	4.301	7	4.3	3425	4.3	165	4.301	17	4.301	9444	4.3	1451	4.3	543	4.3	3845	4.3	55	4.276	12
4.304	4184	4.305	3	4.304	37	4.305	8	4.305	4580	4.304	223	4.305	17	4.305	10933	4.304	1758	4.304	656	4.304	4537	4.304	55	4.281	12
4.308	5001	4.309	4	4.308	36	4.309	8	4.308	5660	4.308	281	4.309	18	4.309	11697	4.308	2000	4.308	744	4.308	4739	4.308	62	4.285	12
4.312	5648	4.313	3	4.312	34	4.313	8	4.312	6599	4.312	343	4.313	20	4.313	11745	4.312	2122	4.312	791	4.312	4722	4.312	68	4.289	14
4.316	6057	4.317	3	4.316	34	4.317	8	4.316	7027	4.316	386	4.317	23	4.317	11133	4.316	2143	4.316	803	4.316	4388	4.316	70	4.293	13
4.32	6103	4.321	3	4.32	32	4.321	7	4.32	6986	4.32	420	4.321	25	4.321	9967	4.32	2023	4.321	765	4.32	3861	4.32	70	4.297	14
4.324	5762	4.325	4	4.324	36	4.325	6	4.325	6677	4.324	431	4.325	26	4.325	8283	4.324	1812	4.325	698	4.324	3136	4.324	71	4.3	14
4.328	5300	4.329	4	4.328	34	4.329	6	4.329	5856	4.328	410	4.329	26	4.329	6503	4.328	1553	4.329	609	4.328	2341	4.328	71	4.304	14
4.332	3682	4.333	5	4.332	35	4.333	6	4.333	4898	4.332	377	4.333	26	4.333	4859	4.332	1276	4.333	504	4.332	1619	4.332	71	4.308	15
4.336	2913	4.337	4	4.337	35	4.337	7	4.337	3893	4.336	336	4.337	26	4.337	3469	4.336	1004	4.337	403	4.336	1275	4.336	64	4.312	14
4.34	2188	4.341	4	4.34	37	4.341	7	4.34	2863	4.34	284	4.341	26	4.341	2325	4.34	772	4.34	312	4.34	1011	4.34	59	4.316	13
4.344	1553	4.345	5	4.344	36	4.345	7	4.344	2190	4.344	238	4.345	24	4.345	1481	4.344	572	4.344	237	4.344	736	4.344	54	4.321	14
4.348	1063	4.349	5	4.348	35	4.349	7	4.348	1600	4.348	190	4.349	22	4.349	875	4.348	425	4.349	181	4.348	529	4.348	52	4.325	13
4.352	761	4.353	4	4.352	31	4.353	6	4.352	1074	4.352	150	4.353	21	4.353	602	4.352	317	4.353	138	4.352	383	4.352	49	4.329	14
4.356	552	4.357	3	4.356	31	4.357	7	4.357	763	4.356	120	4.357	18	4.357	428	4.356	235	4.357	107	4.356	283	4.356	45	4.332	14
4.36	407	4.361	3	4.36	31	4.361	7	4.361	554	4.36	97	4.361	18	4.361	307	4.36	178	4.361	90	4.36	219	4.36	45	4.336	12
4.364	296	4.365	3	4.364	31	4.365	6	4.365	406	4.364	78	4.365	17	4.365	223	4.364	138	4.365	75	4.364	177	4.364	43	4.34	14
4.368	229	4.369	3	4.368	29	4.369	7	4.369	310	4.368	65	4.369	17	4.369	171	4.368	109	4.369	68	4.368	144	4.368	42	4.345	16
4.372	176	4.373	2	4.372	30	4.373	7	4.373	249	4.372	57	4.373	15	4.373	135	4.372	88	4.372	54	4.372	119	4.372	45	4.348	16
4.376	142	4.377	2	4.377	30	4.377	8	4.377	203	4.376	50	4.377	15	4.377	108	4.376	76	4.377	47	4.376	103	4.376	42	4.353	16
4.38	119	4.381	2	4.38	31	4.381	9	4.381	171	4.38	47	4.381	13	4.381	93	4.38	68	4.381	44	4.38	91	4.38	40	4.357	17
4.384	98	4.385	2	4.384	32	4.385	9	4.385	149	4.384	43	4.385	14	4.385	80	4.384	60	4.385	41	4.384	86	4.384	41	4.361	17
4.388	84	4.389	1	4.388	32	4.389	9	4.389	134	4.388	43	4.389	13	4.389	70	4.388	54	4.389	39	4.388	79	4.388	40	4.365	18
4.392	76	4.393	1	4.392	30	4.393	8	4.393	123	4.392	42	4.393	12	4.393	63	4.392	48	4.393	37	4.392	70	4.392	40	4.369	18
4.396	66	4.397	1	4.396	30	4.397	6	4.397	113	4.396	41	4.397	11	4.397	55	4.396	44	4.397	34	4.396	63	4.396	41	4.372	16
4.4	60	4.401	2	4.4	28	4.401	6	4.401	102	4.4	36	4.401	14	4.401	50	4.4	39	4.401	35	4.4	62	4.4	39	4.376	15
4.404	56	4.405	2	4.404	30	4.405	7	4.405	98	4.404	33	4.405	15	4.405	46	4.404	37	4.405	32	4.404	60	4.404	40	4.38	16
4.408	53	4.409	2	4.408	28	4.409	7	4.409	99	4.408	31	4.409	17	4.409	44	4.408	33	4.409	33	4.408	59	4.408	43	4.384	15
4.412	51	4.413	2	4.412	27	4.413	5	4.413	93	4.412	29	4.413	15	4.413	41	4.412	33	4.413	30	4.412	57	4.412	41	4.389	14
4.416	50	4.417	2	4.416	25	4.417	5	4.417	87	4.416	27	4.417	15	4.417	38	4.416	30	4.417	27	4.416	55	4.416	41	4.393	15
4.42	48	4.421	2	4.42	28	4.421	5	4.421	84	4.42	27	4.421	16	4.421	36	4.42	28	4.421	26	4.42	54	4.42	41	4.397	14
4.424	47	4.425	3	4.424	26	4.425	7	4.425	82	4.424	26	4.425	16	4.425	33	4.424	26	4.425	25	4.424	55	4.424	40	4.401	15
4.428	46	4.429	2	4.428	26	4.429	7	4.429	79	4.428	29	4.429	16	4.429	31	4.428	27	4.429	24	4.428	54	4.428	41	4.405	16
4.432	45	4.433	2	4.432	25	4.433	7	4.433	75	4.432	30	4.433	14	4.433	31	4.432	25	4.433	25	4.432	54	4.432	41	4.409	15
4.436	42	4.437	2	4.437	26	4.437	6	4.437	70	4.436	31	4.437	13	4.437	28	4.436	23	4.437	22	4.436	54	4.436	40	4.412	15
4.44	41	4.441	2	4.441	24	4.441	8	4.441	69	4.44	32	4.441	14	4.441	26	4.44	23	4.441	23	4.44	52	4.44	41	4.416	15
4.444	40	4.445	2	4.445	25	4.445	8	4.445	67	4.444	30	4.445	13	4.445	24	4.444	22	4.445	22	4.444	53	4.444	43	4.421	14
4.448	40	4.449	1	4.449	25	4.449	9	4.449	66	4.448	29	4.449	14	4.449	24	4.448	21	4.449	21	4.448	55	4.448	43	4.425	14
4.452	40	4.453	1	4.452	25	4.453	9	4.453	63	4.452	30	4.453	14	4.453	23	4.452	20	4.453	22	4.452	53	4.452	40	4.429	13
4.456	39	4.457	1	4.456	26	4.457	8	4.457	64	4.456	30	4.457	13	4.457	23	4.456	19	4.457	22	4.456	55	4.456	38	4.433	13
4.46	38	4.461	2	4.461	28	4.461	7	4.461	64	4.46	29	4.461	14	4.461	23	4.46	19	4.461	21	4.46	54	4.46	38	4.437	14
4.464	39	4.465	1	4.465	28	4.465	7	4.465	61	4.464	27	4.465	15	4.465	23	4.464	19	4.465	21	4.464	54	4.464	36	4.441	15
4.468	38	4.469	2	4.469	30	4.469	6	4.469	61	4.468	26	4.469	15	4.469	24	4.468	20	4.469	20	4.468	53	4.468	34	4.444	14
4.472	36	4.473	2	4.473	31	4.473	5	4.473	60	4.472	26	4.473	16	4.473	23	4.472	20	4.473	21	4.472	52	4.472	32	4.449	16
4.476	34	4.477	2	4.477	30	4.477	4	4.477	59	4.476	26	4.477	15	4.477	21	4.476	21	4.477	23	4.476	49	4.476	32	4.453	17
4.48	34	4.481	2	4.481	30	4.481	5	4.481	59	4.48	24	4.481	15	4.481	23	4.48	21	4.481	22	4.48	49	4.48	33	4.457	17
4.484	33	4.485	1	4.484	29	4.485	5	4.485	55	4.484	24	4.485	15	4.485	21	4.484	21	4.485	21	4.484	46	4.484	35	4.461	16
4.488	31	4.489	1	4.489	29	4.489	5	4.489	51	4.488	23	4.489	15	4.489	20	4.488	19	4.489	22	4.489	47	4.489	36	4.465	14
4.492	28	4.493	2	4.493	29	4.493	5	4.493	53	4.492	25	4.493	14	4.493	19	4.492	20	4.493	22	4.492	47	4.492	36	4.469	13
4.496	27	4.497	2	4.497	31	4.497	6	4.497	51	4.496	24	4.497	14	4.497	19	4.496	20	4.497	22	4.496	49	4.496	35	4.473	14
4.5	26	4.501	2	4.501	31	4.501	6	4.501	51	4.5	24	4.501	14	4.501	17	4.5	18	4.501	21	4.5	49	4.5	35	4.477	12
4.504	27	4.505	1	4.505	30	4.505	7	4.505	51	4.504	23	4.505	15	4.505	18	4.504	16	4.505	21	4.504	51	4.504	36	4.481	11
4.508	26	4.509	1	4.509	30	4.509	8	4.509	47	4.508	24	4.509	14	4.509	17	4.508	15	4.509	21	4.508	52	4.508	38	4.485	11
4.512	26	4.513	1	4.513	30	4.513	9	4.513	49	4.512	24	4.513	14	4.513	16	4.512	15	4.513	22	4.512	55	4.512	39	4.489	11
4.517	27	4.517	1	4.517	28	4.517	8	4.517	49	4.516	25	4.517	12	4.517	15	4.516	16	4.517	20	4.516	54	4.516	38	4.493	12
4.521	28	4.521	1	4.521	27	4.521	8	4.521	44	4.52	24	4.521	11	4.521	14	4.52	15	4.521	19	4.52	53	4.52	38	4.497	12
4.524	29	4.525	1	4.525	25	4.525	7	4.525	44	4.524	24	4.525	10	4.525	15	4.524	13	4.525	18	4.524	52	4.524	40	4.501	11
4.528	29	4.529	1	4.529	24	4.529	7	4.529	41	4.528	26	4.529	10	4.529	15	4.528	15	4.529	17	4.528	53	4.528	40	4.505	12
4.532	28	4.533	1	4.533	24	4.533	7	4.533	38	4.532	27	4.533	10	4.533	15	4.532	14	4.533	18	4.532	52	4.532	42	4.509	12
4.536	26	4.537	1	4.537	25	4.537	6	4.537	39	4.536	27	4.537	11	4.537	13	4.536	14	4.537	17	4.536	51	4.536	42	4.513	12
4.54	27	4.541	1	4.541	24	4.541	5	4.541	37	4.54	25	4.541	11	4.541	15	4.54	15	4.541	16	4.54	48	4.54	38	4.517	12
4.544	27	4.545	1	4.545	25	4.545	6	4.545	38	4.544	26	4.545	12	4.545	16	4.544	14	4.545	17	4.544	47	4.544	39	4.521	12
4.549	27	4.549	1	4.549	25	4.549	6	4.549	39	4.548	27	4.549	13	4.549	19	4.548	15	4.549	20	4.548	45	4.548	40	4.525	13
																								4.529	13
																								4.533	12
																								4.537	13
																								4.541	13

## Sheet: Isoamylacetate_87.05
2_17_16_mm1		2_17_16_mm2		2_17_16mm3		SCAPADH_2_17_16		SCAPWT_2_17_16		SCAPLPWT_2_17_16		SCAPLPADH_2_17_16		2_17_16_ajm50p		2_16_16_SC		2_16_16_AM		2_16_16_SCAM		2_16_16_AJM		2_16_16_SCAMLP
8.367	0	8.367	0	8.367	0	8.367	0	8.366	5	8.366	4	8.367	1	8.367	1	8.367	0	8.367	9	8.366	13	8.367	0	8.367	30
8.371	0	8.371	0	8.371	0	8.371	0	8.37	5	8.37	4	8.371	1	8.371	1	8.371	0	8.371	7	8.37	13	8.371	0	8.371	31
8.375	0	8.375	0	8.375	0	8.375	0	8.374	5	8.374	3	8.375	1	8.375	1	8.375	0	8.375	7	8.374	13	8.375	0	8.375	31
8.379	0	8.379	0	8.379	0	8.379	0	8.378	6	8.378	4	8.378	1	8.378	1	8.379	0	8.379	7	8.378	14	8.379	0	8.379	32
8.383	0	8.383	0	8.383	0	8.383	0	8.382	7	8.382	2	8.382	1	8.382	1	8.383	0	8.383	8	8.382	15	8.383	0	8.383	33
8.387	0	8.387	0	8.387	0	8.387	0	8.386	7	8.386	3	8.386	1	8.386	1	8.387	0	8.387	7	8.386	16	8.387	0	8.387	30
8.391	0	8.391	1	8.391	0	8.391	0	8.39	7	8.39	4	8.391	1	8.391	1	8.391	0	8.391	7	8.39	16	8.391	0	8.391	30
8.395	0	8.395	0	8.395	0	8.395	0	8.394	7	8.394	4	8.395	1	8.395	1	8.395	0	8.395	8	8.394	15	8.395	0	8.395	29
8.399	0	8.399	0	8.399	0	8.399	0	8.398	6	8.398	5	8.399	1	8.399	1	8.399	0	8.399	8	8.398	15	8.399	0	8.399	29
8.403	0	8.403	0	8.403	0	8.403	0	8.402	6	8.402	5	8.403	0	8.403	0	8.403	0	8.403	8	8.402	14	8.403	0	8.403	28
8.407	0	8.407	0	8.407	0	8.407	0	8.406	5	8.406	6	8.407	0	8.407	0	8.407	0	8.407	8	8.406	14	8.407	0	8.407	27
8.411	0	8.411	0	8.411	0	8.411	0	8.41	5	8.41	6	8.41	0	8.41	0	8.411	0	8.411	9	8.41	14	8.411	0	8.411	25
8.415	0	8.415	0	8.415	0	8.415	0	8.414	5	8.414	6	8.415	0	8.415	0	8.415	0	8.415	8	8.414	14	8.415	0	8.415	26
8.419	0	8.419	0	8.419	0	8.419	0	8.418	4	8.418	6	8.418	0	8.418	0	8.419	0	8.419	7	8.418	15	8.419	0	8.419	26
8.423	0	8.423	0	8.423	0	8.423	0	8.422	4	8.422	6	8.423	0	8.423	0	8.423	0	8.423	7	8.422	14	8.423	0	8.423	26
8.427	0	8.427	0	8.427	0	8.427	0	8.426	3	8.426	6	8.427	0	8.427	0	8.427	0	8.427	8	8.426	13	8.427	0	8.427	26
8.431	0	8.431	0	8.431	0	8.431	0	8.43	4	8.43	5	8.431	0	8.431	0	8.431	0	8.431	8	8.43	13	8.431	0	8.431	25
8.435	0	8.435	0	8.435	0	8.435	0	8.435	4	8.434	4	8.435	0	8.435	0	8.435	0	8.435	8	8.434	13	8.435	0	8.435	25
8.439	0	8.439	0	8.439	0	8.439	0	8.439	4	8.438	4	8.439	0	8.439	0	8.439	0	8.439	7	8.438	13	8.439	0	8.439	26
8.443	0	8.443	0	8.443	0	8.443	0	8.443	4	8.442	4	8.443	1	8.443	1	8.443	0	8.443	8	8.442	12	8.443	0	8.443	26
8.447	0	8.447	0	8.447	0	8.447	0	8.446	5	8.446	4	8.446	1	8.446	1	8.447	0	8.447	8	8.446	11	8.447	0	8.447	26
8.451	0	8.451	0	8.451	0	8.451	0	8.45	4	8.45	4	8.45	1	8.45	1	8.451	0	8.451	8	8.45	10	8.451	0	8.451	25
8.455	0	8.455	0	8.455	0	8.455	0	8.454	5	8.454	5	8.455	1	8.455	1	8.455	0	8.455	8	8.454	10	8.455	0	8.455	24
8.459	0	8.459	0	8.459	0	8.459	0	8.458	5	8.458	4	8.459	1	8.459	1	8.459	0	8.459	9	8.458	12	8.459	0	8.459	24
8.463	0	8.463	0	8.463	0	8.463	0	8.462	4	8.462	4	8.463	1	8.463	1	8.463	0	8.463	8	8.462	11	8.463	0	8.463	23
8.467	0	8.467	0	8.467	0	8.467	0	8.467	4	8.466	5	8.467	1	8.467	1	8.467	0	8.467	8	8.466	10	8.467	0	8.467	24
8.471	0	8.471	0	8.471	0	8.471	0	8.471	4	8.47	4	8.471	0	8.471	0	8.471	0	8.471	8	8.47	9	8.471	0	8.471	24
8.475	0	8.475	0	8.475	0	8.475	0	8.475	3	8.474	4	8.475	0	8.475	0	8.475	0	8.475	7	8.474	9	8.475	0	8.475	23
8.479	0	8.479	0	8.479	0	8.479	0	8.479	3	8.478	4	8.479	0	8.479	0	8.479	0	8.479	7	8.478	9	8.479	0	8.479	23
8.483	0	8.483	0	8.483	0	8.483	0	8.483	2	8.482	3	8.483	0	8.483	0	8.483	0	8.483	7	8.482	9	8.483	0	8.483	23
8.487	0	8.487	0	8.487	0	8.487	0	8.486	4	8.486	3	8.487	0	8.487	0	8.487	0	8.487	6	8.486	8	8.487	0	8.487	22
8.491	0	8.491	0	8.491	0	8.491	0	8.491	5	8.49	3	8.491	0	8.491	0	8.491	0	8.491	7	8.49	7	8.491	0	8.491	23
8.495	0	8.495	0	8.495	0	8.495	0	8.495	5	8.494	3	8.495	0	8.495	0	8.495	0	8.495	6	8.494	8	8.495	0	8.495	23
8.499	0	8.499	0	8.499	0	8.499	0	8.499	4	8.498	3	8.499	1	8.499	1	8.499	0	8.499	6	8.498	8	8.499	0	8.499	23
8.503	0	8.503	0	8.503	0	8.503	0	8.503	4	8.502	3	8.503	1	8.503	1	8.503	0	8.503	7	8.502	9	8.503	0	8.503	23
8.507	0	8.507	0	8.507	0	8.507	0	8.507	5	8.506	4	8.507	1	8.507	1	8.507	0	8.507	7	8.506	9	8.507	0	8.507	23
8.511	0	8.511	0	8.511	0	8.511	0	8.511	5	8.51	4	8.511	1	8.511	1	8.511	0	8.511	7	8.51	9	8.511	0	8.511	22
8.515	0	8.515	0	8.515	0	8.515	0	8.515	3	8.514	4	8.515	1	8.515	1	8.515	0	8.515	7	8.514	10	8.515	0	8.515	24
8.519	0	8.519	0	8.519	0	8.519	0	8.519	2	8.518	4	8.519	2	8.519	2	8.519	0	8.519	7	8.518	10	8.519	0	8.519	25
8.523	0	8.523	0	8.523	2	8.523	0	8.523	3	8.522	5	8.523	2	8.523	2	8.523	0	8.523	7	8.522	10	8.523	0	8.523	22
8.527	0	8.527	0	8.527	0	8.527	0	8.527	4	8.526	5	8.527	1	8.527	1	8.527	0	8.527	7	8.526	11	8.527	0	8.527	23
8.531	1	8.531	0	8.531	0	8.531	0	8.531	4	8.53	4	8.531	1	8.531	1	8.531	0	8.531	7	8.53	10	8.531	0	8.531	21
8.535	2	8.535	0	8.535	2	8.535	0	8.535	4	8.534	10	8.535	1	8.535	1	8.535	0	8.535	8	8.534	10	8.535	0	8.535	23
8.539	13	8.539	1	8.539	35	8.539	0	8.539	5	8.538	21	8.539	1	8.539	1	8.539	0	8.539	7	8.538	10	8.539	0	8.539	24
8.543	34	8.543	8	8.543	121	8.543	0	8.543	5	8.542	50	8.543	1	8.543	1	8.543	0	8.543	8	8.542	12	8.543	0	8.543	24
8.547	73	8.547	21	8.547	261	8.547	0	8.547	5	8.546	99	8.547	2	8.547	2	8.547	0	8.547	8	8.546	18	8.547	0	8.547	26
8.551	150	8.551	50	8.551	488	8.551	0	8.551	5	8.55	188	8.551	1	8.551	1	8.551	0	8.551	7	8.55	31	8.551	0	8.551	31
8.555	283	8.555	100	8.555	888	8.555	0	8.555	7	8.554	340	8.555	2	8.555	2	8.555	0	8.555	8	8.554	52	8.555	0	8.555	41
8.559	491	8.559	189	8.559	1488	8.559	0	8.559	11	8.558	570	8.559	3	8.559	3	8.559	0	8.559	8	8.558	84	8.559	0	8.559	60
8.563	824	8.563	324	8.563	2144	8.563	0	8.563	24	8.562	885	8.563	4	8.563	4	8.563	1	8.563	6	8.562	150	8.563	0	8.563	101
8.567	1314	8.567	512	8.567	4035	8.567	1	8.567	42	8.566	1447	8.567	5	8.567	5	8.567	1	8.567	6	8.566	264	8.567	0	8.567	172
8.571	1958	8.571	761	8.571	5512	8.571	1	8.571	76	8.57	2131	8.571	8	8.571	8	8.571	2	8.571	7	8.57	449	8.571	0	8.571	273
8.575	2800	8.575	1074	8.575	7396	8.575	2	8.575	118	8.574	2934	8.575	12	8.575	12	8.575	2	8.575	7	8.574	694	8.575	0	8.575	432
8.579	3858	8.579	1450	8.579	9774	8.579	3	8.579	178	8.578	3902	8.579	21	8.579	21	8.579	3	8.579	9	8.578	1015	8.579	0	8.579	654
8.583	5147	8.583	1882	8.583	12125	8.583	7	8.583	258	8.582	5014	8.583	30	8.583	30	8.583	4	8.583	7	8.582	1401	8.583	0	8.583	947
8.587	6609	8.587	2320	8.587	15207	8.587	10	8.587	358	8.586	6147	8.587	43	8.587	43	8.587	5	8.587	7	8.586	1606	8.587	0	8.587	1280
8.591	8237	8.591	2742	8.591	17528	8.591	16	8.591	462	8.59	7353	8.591	58	8.591	58	8.591	5	8.591	7	8.59	1993	8.591	0	8.591	1665
8.595	9928	8.595	3183	8.595	18938	8.595	22	8.595	574	8.594	8291	8.595	76	8.595	76	8.595	6	8.595	7	8.594	2736	8.595	0	8.595	2122
8.599	11510	8.599	3587	8.599	21595	8.599	29	8.599	687	8.598	9058	8.599	91	8.599	91	8.599	6	8.599	7	8.598	3444	8.599	0	8.599	2624
8.603	12826	8.603	3861	8.603	23894	8.603	36	8.603	797	8.602	9718	8.603	110	8.603	110	8.603	6	8.603	5	8.602	4101	8.603	0	8.603	3096
8.607	14072	8.607	3970	8.607	26323	8.607	44	8.607	893	8.606	10075	8.607	121	8.607	121	8.607	7	8.607	5	8.606	4654	8.607	0	8.607	3493
8.611	15165	8.611	3943	8.611	29177	8.611	50	8.611	969	8.61	10028	8.611	132	8.611	132	8.611	6	8.611	6	8.61	5104	8.611	0	8.611	3794
8.615	15917	8.615	3831	8.615	31338	8.615	57	8.615	1008	8.614	9698	8.615	139	8.615	139	8.615	6	8.615	6	8.614	5717	8.615	0	8.615	4065
8.619	16253	8.619	3585	8.619	33516	8.619	61	8.619	1022	8.618	9018	8.619	143	8.619	143	8.619	5	8.619	5	8.618	6046	8.619	0	8.619	4233
8.623	16080	8.623	3214	8.623	34910	8.623	62	8.623	999	8.622	8167	8.623	142	8.623	142	8.623	5	8.623	6	8.622	5838	8.623	0	8.623	4205
8.627	15684	8.627	2769	8.627	6038	8.627	64	8.627	954	8.626	7159	8.627	140	8.627	140	8.627	4	8.627	5	8.626	5487	8.627	0	8.627	4003
8.631	15101	8.631	2327	8.631	37604	8.631	64	8.631	892	8.63	5973	8.631	131	8.631	131	8.631	3	8.631	6	8.63	4998	8.631	0	8.631	3735
8.635	13996	8.635	1939	8.635	37757	8.635	61	8.635	810	8.634	4798	8.635	126	8.635	126	8.635	2	8.635	5	8.634	4432	8.635	0	8.635	3399
8.639	12553	8.639	1582	8.639	36807	8.639	57	8.639	710	8.639	3756	8.639	113	8.639	113	8.639	2	8.639	5	8.638	3829	8.639	0	8.639	3017
8.643	10990	8.643	1245	8.643	35247	8.643	51	8.643	614	8.642	2858	8.643	101	8.643	101	8.643	2	8.643	5	8.642	3171	8.643	0	8.643	2567
8.647	9270	8.647	990	8.647	32115	8.647	47	8.647	525	8.646	2107	8.647	91	8.647	91	8.647	1	8.647	6	8.646	2535	8.647	0	8.647	2102
8.651	7722	8.651	774	8.651	27232	8.651	43	8.651	447	8.65	1518	8.651	81	8.651	81	8.651	1	8.651	5	8.65	1988	8.651	0	8.651	1701
8.655	6147	8.655	596	8.655	21035	8.655	38	8.655	369	8.654	1105	8.655	73	8.655	73	8.655	1	8.655	5	8.654	1516	8.655	0	8.655	1372
8.659	4727	8.659	469	8.659	14466	8.659	34	8.659	300	8.658	822	8.659	63	8.659	63	8.659	1	8.659	6	8.658	1159	8.659	0	8.659	1062
8.663	3600	8.663	376	8.663	9067	8.663	30	8.663	240	8.662	620	8.663	54	8.663	54	8.663	1	8.663	6	8.662	880	8.663	0	8.663	814
8.667	2635	8.667	308	8.667	5634	8.667	28	8.667	195	8.666	473	8.667	49	8.667	49	8.667	1	8.667	7	8.666	662	8.667	0	8.667	630
8.671	1860	8.671	268	8.671	3751	8.671	24	8.671	157	8.67	363	8.671	44	8.671	44	8.671	1	8.671	7	8.67	497	8.671	0	8.671	483
8.675	1349	8.675	242	8.675	1505	8.675	21	8.675	126	8.675	289	8.675	37	8.675	37	8.675	1	8.675	7	8.674	377	8.675	0	8.675	377
8.679	934	8.679	232	8.679	1043	8.679	19	8.679	104	8.678	239	8.679	34	8.679	34	8.679	0	8.679	6	8.678	298	8.679	0	8.679	300
8.683	707	8.683	233	8.683	635	8.683	16	8.683	85	8.682	199	8.683	28	8.683	28	8.683	0	8.683	7	8.682	245	8.683	0	8.683	249
8.687	553	8.687	236	8.687	504	8.687	15	8.687	75	8.686	177	8.687	24	8.687	24	8.687	0	8.687	7	8.686	202	8.687	0	8.687	215
8.691	437	8.691	236	8.691	410	8.691	13	8.691	64	8.69	159	8.691	20	8.691	20	8.691	0	8.691	7	8.69	175	8.691	0	8.691	198
8.695	358	8.695	239	8.695	348	8.695	12	8.695	55	8.694	148	8.695	19	8.695	19	8.695	0	8.695	6	8.694	157	8.695	0	8.695	181
8.699	300	8.699	241	8.699	307	8.699	11	8.699	49	8.698	141	8.699	18	8.699	18	8.699	0	8.699	5	8.699	150	8.699	0	8.699	177
8.703	251	8.703	244	8.703	246	8.703	11	8.703	44	8.702	136	8.703	17	8.703	17	8.703	0	8.703	6	8.703	143	8.703	0	8.703	176
8.707	214	8.707	241	8.707	241	8.707	9	8.707	41	8.706	129	8.707	15	8.707	15	8.707	0	8.707	6	8.707	138	8.707	0	8.707	176
8.711	178	8.711	239	8.711	232	8.711	9	8.711	38	8.71	122	8.711	14	8.711	14	8.711	0	8.711	5	8.71	137	8.711	0	8.711	174
8.715	152	8.715	231	8.715	226	8.715	8	8.715	32	8.714	113	8.715	14	8.715	14	8.715	0	8.715	6	8.714	133	8.715	0	8.715	170
8.719	130	8.719	220	8.719	245	8.719	8	8.719	29	8.718	105	8.719	13	8.719	13	8.719	0	8.719	6	8.718	127	8.719	0	8.719	167
8.723	114	8.723	209	8.723	204	8.723	7	8.723	27	8.722	97	8.723	12	8.723	12	8.723	0	8.723	6	8.722	120	8.723	0	8.723	164
8.727	102	8.727	188	8.727	180	8.727	6	8.727	25	8.726	87	8.727	10	8.727	10	8.727	0	8.727	6	8.727	109	8.727	0	8.727	157
8.731	99	8.731	167	8.731	171	8.731	5	8.731	22	8.73	75	8.731	9	8.731	9	8.731	0	8.731	5	8.731	96	8.731	0	8.731	148
8.735	102	8.735	146	8.735	144	8.735	6	8.735	20	8.734	69	8.735	9	8.735	9	8.735	0	8.735	6	8.735	85	8.735	0	8.735	134
8.739	118	8.739	119	8.739	143	8.739	5	8.739	19	8.738	62	8.739	8	8.739	8	8.739	0	8.739	6	8.739	73	8.739	0	8.739	119
8.743	140	8.743	98	8.743	130	8.743	5	8.743	19	8.742	53	8.743	8	8.743	8	8.743	0	8.743	5	8.743	64	8.743	0	8.743	107
8.747	165	8.747	82	8.747	81	8.747	4	8.747	18	8.747	47	8.747	8	8.747	8	8.747	0	8.747	4	8.747	58	8.747	0	8.747	93
8.751	179	8.751	64	8.751	76	8.751	4	8.751	17	8.75	40	8.751	7	8.751	7	8.751	0	8.751	5	8.75	52	8.751	0	8.751	78
8.755	184	8.755	50	8.755	71	8.755	4	8.755	17	8.754	36	8.755	7	8.755	7	8.755	0	8.755	4	8.754	45	8.755	0	8.755	64
8.759	180	8.759	38	8.759	79	8.759	4	8.759	18	8.758	32	8.759	6	8.759	6	8.759	0	8.759	4	8.759	43	8.759	0	8.759	54
8.763	167	8.763	32	8.763	64	8.763	3	8.763	17	8.762	28	8.763	5	8.763	5	8.763	0	8.763	5	8.763	38	8.763	0	8.763	48
8.767	145	8.767	25	8.767	61	8.767	2	8.767	16	8.766	27	8.767	5	8.767	5	8.767	0	8.767	4	8.767	33	8.767	0	8.767	41
8.771	116	8.771	21	8.771	46	8.771	3	8.771	14	8.77	27	8.771	4	8.771	4	8.771	0	8.771	2	8.771	28	8.771	0	8.771	35
8.775	84	8.775	17	8.775	42	8.775	3	8.775	13	8.774	27	8.775	4	8.775	4	8.775	0	8.775	3	8.775	27	8.775	0	8.775	30
8.779	61	8.779	12	8.779	45	8.779	2	8.779	13	8.778	28	8.779	5	8.779	5	8.779	0	8.779	3	8.779	25	8.779	0	8.779	28
8.783	44	8.783	10	8.783	41	8.783	2	8.783	13	8.782	27	8.783	4	8.783	4	8.783	0	8.783	3	8.783	25	8.783	0	8.783	27
8.787	31	8.787	10	8.787	44	8.787	2	8.787	12	8.786	28	8.787	4	8.787	4	8.787	0	8.787	4	8.787	23	8.787	0	8.787	25
8.791	25	8.791	8	8.791	49	8.791	3	8.791	11	8.79	27	8.791	5	8.791	5	8.791	0	8.791	3	8.791	20	8.791	0	8.791	24
8.795	22	8.795	7	8.795	44	8.795	2	8.795	11	8.794	24	8.795	5	8.795	5	8.795	0	8.795	4	8.795	21	8.795	0	8.795	23
8.799	18	8.799	6	8.799	48	8.799	1	8.799	11	8.798	26	8.799	5	8.799	5	8.799	0	8.799	5	8.799	19	8.799	0	8.799	23
8.803	16	8.803	6	8.803	28	8.803	2	8.803	10	8.802	24	8.803	5	8.803	5	8.803	0	8.803	5	8.803	17	8.803	0	8.803	23
8.807	14	8.807	5	8.807	36	8.807	1	8.807	9	8.806	23	8.807	5	8.807	5	8.807	0	8.807	5	8.807	16	8.807	0	8.807	23
8.811	14	8.811	5	8.811	34	8.811	1	8.811	9	8.81	22	8.811	4	8.811	4	8.811	0	8.811	5	8.811	15	8.811	0	8.811	21
8.815	13	8.815	4	8.815	39	8.815	1	8.815	8	8.814	21	8.815	4	8.815	4	8.815	0	8.815	5	8.815	14	8.815	0	8.815	21
8.819	13	8.819	4	8.819	25	8.819	1	8.819	7	8.818	22	8.819	4	8.819	4	8.819	0	8.819	6	8.819	14	8.819	0	8.819	21
8.823	11	8.823	5	8.823	33	8.823	1	8.823	7	8.823	21	8.823	3	8.823	3	8.823	0	8.823	6	8.823	14	8.823	0	8.823	20
8.827	10	8.827	4	8.827	23	8.827	1	8.827	8	8.826	19	8.827	2	8.827	2	8.827	0	8.827	5	8.827	14	8.827	0	8.827	19
8.831	10	8.831	3	8.831	27	8.831	1	8.831	8	8.83	20	8.831	2	8.831	2	8.831	0	8.831	5	8.831	14	8.831	0	8.831	21
8.835	8	8.835	4	8.835	41	8.835	1	8.835	7	8.834	19	8.835	2	8.835	2	8.835	0	8.835	4	8.835	14	8.835	0	8.835	20
8.839	8	8.839	4	8.839	35	8.839	1	8.839	6	8.838	19	8.839	3	8.839	3	8.839	0	8.839	4	8.839	15	8.839	0	8.839	23
8.843	9	8.843	5	8.843	33	8.843	1	8.843	7	8.842	19	8.843	3	8.843	3	8.843	0	8.843	5	8.843	14	8.843	0	8.843	22
8.847	8	8.847	4	8.847	27	8.847	1	8.847	8	8.846	19	8.847	2	8.847	2	8.847	0	8.847	4	8.847	14	8.847	0	8.847	21
8.851	8	8.851	4	8.851	30	8.851	1	8.851	6	8.85	17	8.851	3	8.851	3	8.851	0	8.851	5	8.851	14	8.851	0	8.851	21
8.855	9	8.855	4	8.855	27	8.855	1	8.855	5	8.855	16	8.855	3	8.855	3	8.855	0	8.855	5	8.855	14	8.855	0	8.855	21
8.859	9	8.859	4	8.859	27	8.859	1	8.859	5	8.858	15	8.859	3	8.859	3	8.859	0	8.859	5	8.859	15	8.859	0	8.859	20
8.863	10	8.863	3	8.863	29	8.863	1	8.863	5	8.863	15	8.863	3	8.863	3	8.863	0	8.863	5	8.863	14	8.863	0	8.863	19
8.867	8	8.867	3	8.867	19	8.867	1	8.867	5	8.866	14	8.867	2	8.867	2	8.867	0	8.867	4	8.867	13	8.867	0	8.867	18
8.871	8	8.871	3	8.871	33	8.871	1	8.871	5	8.87	13	8.871	3	8.871	3	8.871	0	8.871	4	8.871	14	8.871	0	8.871	17
8.875	8	8.875	3	8.875	20	8.875	1	8.875	5	8.874	13	8.875	3	8.875	3	8.875	0	8.875	5	8.875	14	8.875	0	8.875	17
8.879	8	8.879	4	8.879	18	8.879	1	8.879	6	8.878	14	8.879	3	8.879	3	8.879	0	8.879	4	8.879	12	8.879	0	8.879	17
8.883	8	8.883	4	8.883	17	8.883	0	8.883	7	8.882	14	8.883	2	8.883	2	8.883	0	8.883	4	8.883	12	8.883	0	8.883	19
8.887	8	8.887	4	8.887	21	8.887	0	8.887	8	8.886	14	8.887	2	8.887	2	8.887	0	8.887	4	8.887	11	8.887	0	8.887	18
8.891	8	8.891	4	8.891	14	8.891	1	8.891	8	8.891	13	8.891	2	8.891	2	8.891	0	8.891	4	8.891	11	8.891	0	8.891	18
8.895	8	8.895	3	8.895	10	8.895	0	8.895	7	8.894	13	8.895	2	8.895	2	8.895	0	8.895	4	8.895	12	8.895	0	8.895	17
8.899	7	8.899	3	8.899	28	8.899	0	8.899	8	8.899	14	8.899	2	8.899	2	8.899	0	8.899	4	8.899	12	8.899	0	8.899	17
8.903	6	8.903	3	8.903	24	8.903	0	8.903	7	8.902	13	8.903	2	8.903	2	8.903	0	8.903	3	8.903	11	8.903	0	8.903	19
8.907	5	8.907	3	8.907	21	8.907	0	8.907	7	8.906	13	8.907	2	8.907	2	8.907	0	8.907	3	8.907	12	8.907	0	8.907	18
8.911	4	8.911	3	8.911	6	8.911	0	8.911	6	8.91	12	8.911	3	8.911	3	8.911	0	8.911	3	8.911	12	8.911	0	8.911	16
8.915	4	8.915	2	8.915	10	8.915	1	8.915	4	8.914	12	8.915	2	8.915	2	8.915	0	8.915	3	8.915	12	8.915	0	8.915	15
8.919	4	8.919	2	8.919	14	8.919	1	8.919	4	8.918	13	8.919	3	8.919	3	8.919	0	8.919	3	8.919	12	8.919	0	8.919	16
8.923	4	8.923	2	8.923	12	8.923	1	8.923	5	8.922	13	8.923	3	8.923	3	8.923	0	8.923	4	8.923	12	8.923	0	8.923	15
8.927	4	8.927	2	8.927	12	8.927	1	8.927	3	8.927	12	8.927	3	8.927	3	8.927	0	8.927	4	8.927	11	8.927	0	8.927	16
8.931	4	8.931	2	8.931	18	8.931	1	8.931	3	8.931	12	8.931	3	8.931	3	8.931	0	8.931	5	8.931	12	8.931	0	8.931	15
8.935	4	8.935	2	8.935	15	8.935	1	8.935	3	8.934	12	8.935	3	8.935	3	8.935	0	8.935	5	8.935	13	8.935	0	8.935	16
8.939	4	8.939	2	8.939	9	8.939	1	8.939	4	8.938	13	8.939	3	8.939	3	8.939	0	8.939	6	8.939	12	8.939	0	8.939	15
8.943	5	8.943	2	8.943	10	8.943	1	8.943	6	8.942	13	8.943	3	8.943	3	8.943	0	8.943	6	8.943	12	8.943	0	8.943	14
8.947	4	8.947	2	8.947	14	8.947	0	8.947	6	8.946	13	8.947	2	8.947	2	8.947	0	8.947	7	8.947	12	8.947	0	8.947	16
8.951	5	8.951	2	8.951	8	8.951	0	8.951	5	8.95	12	8.951	2	8.951	2	8.951	0	8.951	7	8.951	10	8.951	0	8.951	17
8.955	5	8.955	2	8.955	15	8.955	0	8.955	5	8.954	12	8.955	2	8.955	2	8.955	0	8.955	7	8.955	11	8.955	0	8.955	16
8.959	5	8.959	2	8.959	25	8.959	1	8.959	5	8.959	12	8.959	2	8.959	2	8.959	0	8.959	6	8.959	12	8.959	0	8.959	15
8.963	5	8.963	2	8.963	12	8.963	1	8.963	6	8.963	13	8.963	1	8.963	1	8.963	0	8.963	6	8.963	11	8.963	0	8.963	15
8.967	3	8.967	2	8.967	11	8.967	1	8.967	5	8.967	13	8.967	1	8.967	1	8.967	0	8.967	6	8.967	11	8.967	0	8.967	17
8.971	3	8.971	2	8.971	17	8.971	1	8.971	4	8.97	11	8.971	1	8.971	1	8.971	0	8.971	5	8.971	12	8.971	0	8.971	18
8.975	2	8.975	2	8.975	14	8.975	1	8.975	4	8.974	11	8.975	1	8.975	1	8.975	0	8.975	5	8.975	11	8.975	0	8.975	17
8.979	2	8.979	2	8.979	11	8.979	1	8.979	4	8.978	11	8.979	1	8.979	1	8.979	0	8.979	4	8.979	11	8.979	0	8.979	17
8.983	1	8.983	1	8.983	10	8.983	0	8.983	4	8.983	11	8.983	1	8.983	1	8.983	0	8.983	4	8.983	11	8.983	0	8.983	17
8.987	1	8.987	1	8.987	8	8.987	0	8.987	3	8.987	12	8.987	2	8.987	2	8.987	0	8.987	5	8.987	11	8.987	0	8.987	16
8.991	1	8.991	2	8.991	13	8.991	0	8.991	2	8.991	10	8.991	3	8.991	3	8.991	0	8.991	5	8.991	11	8.991	0	8.991	16
8.995	1	8.995	2	8.995	13	8.995	0	8.995	2	8.995	11	8.995	3	8.995	3	8.995	0	8.995	4	8.995	12	8.995	0	8.995	15
8.999	2	8.999	1	8.999	11	8.999	0	8.999	3	8.999	12	8.999	3	8.999	3	8.999	0	8.999	4	8.999	11	8.999	0	8.999	14
9.003	2	9.003	1	9.003	17	9.003	0	9.003	3	9.003	10	9.003	3	9.003	3	9.003	0	9.003	4	9.003	12	9.003	0	9.003	13
9.007	2	9.007	1	9.007	3	9.007	0	9.007	4	9.007	10	9.007	3	9.007	3	9.007	0	9.007	4	9.007	11	9.007	0	9.007	13
9.011	2	9.011	2	9.011	15	9.011	0	9.011	4	9.01	11	9.011	4	9.011	4	9.011	0	9.011	4	9.011	11	9.011	0	9.011	12
9.015	2	9.015	2	9.015	11	9.015	0	9.015	5	9.015	9	9.015	3	9.015	3	9.015	0	9.015	3	9.015	10	9.015	0	9.015	13
9.019	2	9.019	2	9.019	6	9.019	0	9.019	5	9.019	9	9.019	2	9.019	2	9.019	0	9.019	3	9.019	10	9.019	0	9.019	13
9.023	1	9.023	2	9.023	7	9.023	1	9.023	4	9.023	9	9.023	2	9.023	2	9.023	0	9.023	2	9.023	8	9.023	0	9.023	15
9.027	0	9.027	2	9.027	5	9.027	1	9.027	4	9.027	8	9.027	2	9.027	2	9.027	0	9.027	3	9.027	8	9.027	0	9.027	15
9.031	1	9.031	1	9.031	15	9.031	1	9.031	4	9.031	8	9.031	2	9.031	2	9.031	0	9.031	4	9.031	7	9.031	0	9.031	15
9.035	1	9.035	2	9.035	6	9.035	1	9.035	3	9.035	8	9.035	2	9.035	2	9.035	0	9.035	5	9.035	6	9.035	0	9.035	17
9.039	1	9.039	2	9.039	7	9.039	1	9.039	5	9.039	8	9.039	1	9.039	1	9.039	0	9.039	5	9.039	6	9.039	0	9.039	17
9.043	1	9.043	1	9.043	5	9.043	1	9.043	5	9.043	8	9.043	2	9.043	2	9.043	0	9.043	6	9.043	5	9.043	0	9.043	15
9.047	1	9.047	2	9.047	12	9.047	2	9.047	5	9.047	8	9.047	1	9.047	1	9.047	0	9.047	7	9.047	5	9.047	0	9.047	15
9.051	2	9.051	1	9.051	10	9.051	1	9.051	5	9.051	8	9.051	1	9.051	1	9.051	0	9.051	7	9.051	5	9.051	0	9.051	13
9.055	2	9.055	1	9.055	6	9.055	1	9.055	6	9.055	7	9.055	2	9.055	2	9.055	0	9.055	7	9.055	6	9.055	0	9.055	13
9.059	1	9.059	2	9.059	4	9.059	1	9.059	5	9.059	7	9.059	2	9.059	2	9.059	0	9.059	6	9.059	7	9.059	0	9.059	13
9.063	2	9.063	1	9.063	10	9.063	0	9.063	5	9.063	7	9.063	2	9.063	2	9.063	0	9.063	5	9.063	7	9.063	0	9.063	12
9.067	2	9.067	1	9.067	5	9.067	0	9.067	4	9.067	7	9.067	2	9.067	2	9.067	0	9.067	5	9.067	7	9.067	0	9.067	12
9.071	2	9.071	1	9.071	12	9.071	0	9.071	4	9.071	6	9.071	2	9.071	2	9.071	0	9.071	4	9.071	7	9.071	0	9.071	13
9.075	2	9.075	1	9.075	7	9.075	0	9.075	3	9.075	6	9.075	2	9.075	2	9.075	0	9.075	3	9.075	7	9.075	0	9.075	14
9.079	2	9.079	1	9.079	9	9.079	0	9.079	3	9.079	6	9.079	2	9.079	2	9.079	0	9.079	3	9.079	8	9.079	0	9.079	14
9.083	2	9.083	1	9.083	5	9.083	0	9.083	3	9.083	7	9.083	2	9.083	2	9.083	0	9.083	2	9.083	8	9.083	0	9.083	14
9.087	2	9.087	1	9.087	7	9.087	1	9.087	3	9.087	9	9.087	3	9.087	3	9.087	0	9.087	2	9.087	7	9.087	0	9.087	13
9.091	2	9.091	1	9.091	2	9.091	1	9.091	4	9.091	9	9.091	3	9.091	3	9.091	0	9.091	2	9.091	8	9.091	0	9.091	13
9.095	2	9.095	1	9.095	7	9.095	1	9.095	4	9.095	9	9.095	2	9.095	2	9.095	0	9.095	1	9.095	8	9.095	0	9.095	13
9.099	2	9.099	1	9.099	7	9.099	1	9.099	5	9.099	10	9.099	2	9.099	2	9.099	0	9.099	2	9.099	8	9.099	0	9.099	13
9.103	2	9.103	1	9.103	10	9.103	1	9.103	5	9.103	9	9.103	2	9.103	2	9.103	0	9.103	2	9.103	9	9.103	0	9.103	11
9.107	1	9.107	1	9.107	11	9.107	1	9.107	5	9.107	9	9.107	2	9.107	2	9.107	0	9.107	3	9.107	10	9.107	0	9.107	10
9.111	1	9.111	1	9.111	7	9.111	0	9.111	5	9.111	9	9.111	1	9.111	1	9.111	0	9.111	3	9.111	9	9.111	0	9.111	10
9.115	2	9.115	1	9.115	6	9.115	0	9.115	4	9.115	7	9.115	0	9.115	0	9.115	0	9.115	3	9.115	9	9.115	0	9.115	11
9.119	2	9.119	2	9.119	5	9.119	0	9.119	4	9.119	7	9.119	0	9.119	0	9.119	0	9.119	3	9.119	9	9.119	0	9.119	11
9.123	2	9.123	2	9.123	7	9.123	0	9.123	2	9.123	7	9.123	0	9.123	0	9.123	0	9.123	4	9.123	9	9.123	0	9.123	9
9.127	2	9.127	2	9.127	9	9.127	0	9.127	2	9.127	6	9.127	0	9.127	0	9.127	0	9.127	4	9.127	9	9.127	0	9.127	9
9.131	2	9.131	3	9.131	10	9.131	0	9.131	2	9.131	7	9.131	1	9.131	1	9.131	0	9.131	4	9.131	8	9.131	0	9.131	9
9.135	2	9.135	3	9.135	6	9.135	0	9.135	3	9.135	6	9.135	1	9.135	1	9.135	0	9.135	3	9.135	7	9.135	0	9.135	10
9.139	3	9.139	2	9.139	9	9.139	0	9.139	3	9.139	5	9.139	1	9.139	1	9.139	0	9.139	3	9.139	6	9.139	0	9.139	8
9.143	3	9.143	2	9.143	4	9.143	0	9.143	4	9.143	5	9.143	1	9.143	1	9.143	0	9.143	3	9.143	7	9.143	0	9.143	7
9.147	3	9.147	1	9.147	0	9.147	0	9.147	4	9.147	4	9.147	1	9.147	1	9.147	0	9.147	3	9.147	7	9.147	0	9.147	6
9.151	3	9.151	2	9.151	4	9.151	0	9.151	4	9.151	5	9.151	1	9.151	1	9.151	0	9.151	2	9.151	7	9.151	0	9.151	7
9.155	3	9.155	1	9.155	10	9.155	0	9.155	4	9.155	5	9.155	1	9.155	1	9.155	0	9.155	2	9.155	5	9.155	0	9.155	7
9.159	3	9.159	1	9.159	5	9.159	0	9.159	4	9.159	5	9.159	1	9.159	1	9.159	0	9.159	2	9.159	5	9.159	0	9.159	9
9.163	3	9.163	1	9.163	5	9.163	0	9.163	3	9.163	5	9.163	1	9.163	1	9.163	0	9.163	2	9.163	5	9.163	0	9.163	10
9.167	2	9.167	1	9.167	6	9.167	0	9.167	3	9.167	5	9.167	1	9.167	1	9.167	0	9.167	2	9.167	6	9.167	0	9.167	10
9.171	2	9.171	1	9.171	4	9.171	0	9.171	2	9.171	5	9.171	1	9.171	1	9.172	0	9.171	2	9.171	5	9.171	0	9.171	11
9.175	2	9.175	1	9.175	6	9.175	0	9.175	2	9.175	5	9.175	1	9.175	1	9.175	0	9.175	3	9.175	6	9.175	0	9.175	12
9.179	2	9.179	0	9.179	2	9.179	0	9.179	1	9.179	5	9.179	1	9.179	1	9.179	0	9.179	3	9.179	6	9.179	0	9.179	11
9.183	2	9.183	0	9.183	6	9.183	0	9.183	2	9.183	5	9.183	1	9.183	1	9.183	0	9.183	3	9.183	6	9.183	0	9.183	12
9.187	2	9.187	0	9.187	2	9.187	0	9.187	1	9.187	6	9.187	1	9.187	1	9.187	0	9.187	2	9.187	6	9.187	0	9.187	11
9.191	1	9.191	0	9.191	8	9.191	0	9.191	2	9.191	6	9.191	1	9.191	1	9.191	0	9.191	2	9.191	7	9.191	0	9.191	9
9.195	1	9.195	0	9.195	0	9.195	0	9.195	1	9.195	7	9.195	1	9.195	1	9.195	0	9.195	3	9.195	7	9.195	0	9.195	11
9.199	0	9.199	0	9.199	8	9.199	0	9.199	1	9.199	7	9.199	1	9.199	1	9.199	0	9.199	3	9.199	9	9.199	0	9.199	11
9.203	0	9.203	1	9.203	4	9.203	0	9.203	1	9.203	7	9.203	1	9.203	1	9.203	0	9.203	3	9.203	8	9.203	0	9.203	11
9.207	0	9.207	1	9.207	4	9.207	0	9.207	2	9.207	6	9.207	2	9.207	2	9.208	0	9.207	2	9.207	8	9.207	0	9.207	11
9.211	0	9.211	1	9.211	2	9.211	0	9.211	1	9.211	7	9.211	2	9.211	2	9.211	0	9.211	2	9.211	7	9.211	0	9.211	10
9.215	0	9.215	1	9.215	2	9.215	0	9.215	1	9.215	6	9.215	2	9.215	2	9.215	0	9.215	3	9.215	6	9.215	0	9.215	9
9.219	0	9.219	1	9.219	4	9.219	0	9.219	2	9.219	5	9.219	2	9.219	2	9.219	0	9.219	4	9.219	5	9.219	0	9.219	10
9.223	0	9.223	1	9.223	9	9.223	0	9.223	2	9.223	5	9.223	2	9.223	2	9.223	0	9.223	2	9.223	5	9.223	0	9.223	10
9.227	0	9.227	1	9.227	3	9.227	0	9.227	3	9.227	5	9.227	2	9.227	2	9.227	0	9.227	2	9.227	4	9.227	0	9.227	9
9.231	0	9.231	0	9.231	5	9.231	0	9.231	3	9.231	5	9.231	2	9.231	2	9.231	0	9.231	2	9.231	4	9.231	0	9.231	9
9.235	0	9.235	0	9.235	2	9.235	0	9.235	3	9.235	5	9.235	1	9.235	1	9.236	0	9.235	3	9.235	4	9.235	0	9.235	8
9.239	0	9.239	0	9.239	6	9.239	0	9.239	3	9.239	4	9.239	1	9.239	1	9.24	0	9.239	2	9.239	4	9.239	0	9.239	9
9.243	0	9.243	0	9.243	5	9.243	0	9.243	4	9.243	5	9.243	2	9.243	2	9.243	0	9.243	2	9.243	5	9.243	0	9.243	11
9.247	0	9.247	0	9.247	3	9.247	0	9.247	3	9.247	6	9.247	2	9.247	2	9.248	0	9.247	2	9.247	5	9.247	0	9.247	10
9.251	0	9.251	0	9.251	2	9.251	0	9.251	3	9.251	6	9.251	2	9.251	2	9.251	0	9.251	2	9.251	5	9.251	0	9.251	9
9.255	0	9.255	0	9.255	4	9.255	1	9.255	2	9.255	7	9.255	1	9.255	1	9.255	0	9.255	3	9.255	5	9.255	0	9.255	10
9.259	0	9.259	0	9.259	0	9.259	1	9.259	2	9.259	7	9.259	1	9.259	1	9.259	0	9.259	3	9.259	5	9.259	0	9.259	11
9.263	0	9.263	0	9.263	6	9.263	1	9.263	2	9.263	7	9.263	2	9.263	2	9.263	0	9.263	3	9.263	6	9.263	0	9.263	11
9.267	1	9.267	0	9.267	4	9.267	1	9.267	2	9.267	7	9.267	2	9.267	2	9.268	0	9.267	3	9.267	6	9.267	0	9.267	11
9.271	1	9.271	0	9.271	5	9.271	0	9.271	1	9.271	7	9.271	1	9.271	1	9.272	0	9.271	3	9.271	5	9.271	0	9.271	10
9.275	1	9.275	1	9.275	0	9.275	0	9.275	1	9.275	8	9.275	1	9.275	1	9.276	0	9.275	3	9.275	6	9.275	0	9.275	11
9.279	1	9.279	1	9.279	0	9.279	0	9.279	1	9.279	7	9.279	1	9.279	1	9.28	0	9.279	2	9.279	6	9.279	0	9.279	11
9.283	1	9.283	0	9.283	9	9.283	0	9.283	1	9.283	6	9.283	1	9.283	1	9.283	0	9.283	1	9.283	6	9.283	0	9.283	11
9.287	1	9.287	0	9.287	2	9.287	0	9.287	2	9.287	6	9.287	1	9.287	1	9.287	0	9.287	1	9.287	6	9.287	0	9.287	10
9.291	1	9.291	0	9.291	2	9.291	0	9.291	1	9.291	6	9.291	1	9.291	1	9.291	0	9.291	2	9.291	5	9.291	0	9.291	11
9.295	1	9.295	0	9.295	2	9.295	0	9.295	1	9.295	6	9.295	1	9.295	1	9.295	0	9.295	1	9.295	5	9.295	0	9.295	10
9.299	1	9.299	1	9.299	6	9.299	0	9.299	1	9.299	6	9.299	1	9.299	1	9.3	0	9.299	2	9.299	4	9.299	0	9.299	11
9.303	1	9.303	0	9.303	2	9.303	0	9.303	1	9.303	5	9.303	1	9.303	1	9.304	0	9.303	2	9.303	3	9.303	0	9.303	12
9.307	1	9.307	0	9.307	4	9.307	0	9.307	1	9.307	5	9.307	1	9.307	1	9.308	0	9.307	2	9.307	3	9.307	0	9.307	12
9.311	1	9.311	0	9.311	2	9.311	0	9.311	1	9.311	6	9.311	1	9.311	1	9.311	0	9.311	2	9.311	3	9.311	0	9.311	14
9.315	1	9.315	0	9.315	6	9.315	1	9.315	1	9.315	7	9.315	1	9.315	1	9.316	0	9.315	3	9.315	4	9.315	0	9.315	18
9.319	1	9.319	0	9.319	2	9.319	1	9.319	1	9.319	7	9.319	0	9.319	0	9.32	0	9.319	2	9.319	4	9.319	0	9.319	22
9.323	1	9.323	0	9.323	2	9.323	1	9.323	2	9.323	7	9.323	0	9.323	0	9.324	0	9.323	2	9.323	4	9.323	0	9.323	24
9.327	1	9.327	0	9.327	0	9.327	1	9.327	2	9.327	6	9.327	0	9.327	0	9.328	0	9.327	2	9.327	5	9.327	0	9.327	29
9.331	1	9.331	0	9.331	2	9.331	1	9.331	2	9.331	7	9.331	0	9.331	0	9.332	0	9.331	2	9.331	6	9.331	0	9.331	32
9.335	0	9.335	0	9.335	4	9.335	1	9.335	2	9.335	7	9.335	0	9.335	0	9.336	0	9.335	2	9.335	6	9.335	0	9.335	35
9.339	0	9.339	0	9.339	3	9.339	1	9.339	2	9.339	6	9.339	1	9.339	1	9.34	0	9.339	2	9.339	6	9.339	0	9.339	36
9.343	0	9.343	0	9.343	5	9.343	0	9.343	2	9.343	5	9.343	1	9.343	1	9.344	0	9.343	2	9.343	4	9.343	0	9.343	35
9.347	0	9.347	0	9.347	7	9.347	0	9.347	1	9.347	5	9.347	1	9.347	1	9.348	0	9.347	2	9.347	4	9.347	0	9.347	33
9.351	0	9.351	0	9.351	2	9.351	0	9.351	1	9.351	5	9.351	1	9.351	1	9.352	0	9.351	2	9.351	5	9.351	0	9.351	33
9.355	1	9.355	0	9.355	7	9.355	0	9.355	2	9.355	5	9.355	1	9.355	1	9.356	0	9.355	3	9.355	4	9.355	0	9.355	31
9.359	1	9.359	1	9.359	9	9.359	0	9.359	2	9.359	4	9.359	1	9.359	1	9.36	0	9.359	4	9.359	4	9.359	0	9.359	29
9.363	1	9.363	1	9.363	17	9.363	0	9.363	2	9.363	4	9.363	1	9.363	1	9.364	0	9.363	4	9.363	4	9.363	0	9.363	29
9.367	1	9.367	1	9.367	16	9.367	0	9.367	2	9.367	5	9.367	1	9.367	1	9.368	0	9.367	5	9.367	5	9.367	0	9.367	29
9.371	1	9.371	1	9.371	12	9.371	0	9.371	2	9.371	4	9.371	1	9.371	1	9.372	0	9.371	4	9.371	6	9.371	0	9.371	28
9.375	2	9.375	1	9.375	18	9.375	0	9.375	2	9.375	5	9.375	1	9.375	1	9.376	0	9.375	4	9.375	5	9.375	0	9.375	29
9.379	3	9.379	2	9.379	14	9.379	0	9.379	2	9.379	5	9.379	1	9.379	1	9.38	0	9.379	5	9.379	6	9.379	0	9.379	31
9.383	3	9.383	2	9.383	8	9.383	0	9.383	2	9.383	5	9.383	1	9.383	1	9.384	0	9.383	3	9.383	6	9.383	0	9.383	29
9.387	3	9.387	2	9.387	13	9.387	0	9.387	2	9.387	5	9.387	0	9.387	0	9.388	0	9.387	3	9.387	6	9.387	0	9.387	28
9.391	3	9.391	1	9.391	17	9.391	0	9.391	2	9.391	5	9.391	1	9.391	1	9.392	0	9.391	2	9.391	8	9.391	0	9.391	26
9.395	3	9.395	2	9.395	12	9.395	0	9.395	2	9.395	6	9.395	1	9.395	1	9.396	0	9.395	2	9.395	7	9.395	0	9.395	24
9.399	4	9.399	2	9.399	11	9.399	0	9.399	2	9.399	5	9.399	1	9.399	1	9.4	0	9.399	2	9.399	7	9.399	0	9.399	23
9.403	3	9.403	2	9.403	10	9.403	0	9.403	3	9.403	5	9.403	1	9.403	1	9.404	0	9.403	2	9.403	8	9.403	0	9.403	22
9.407	3	9.407	2	9.407	10	9.407	0	9.407	3	9.407	6	9.407	1	9.407	1	9.408	0	9.407	2	9.407	6	9.407	0	9.407	20
9.411	2	9.411	2	9.411	11	9.411	0	9.411	3	9.411	6	9.411	1	9.411	1	9.412	0	9.411	3	9.411	6	9.411	0	9.411	20
9.415	2	9.415	3	9.415	10	9.415	0	9.415	3	9.415	5	9.415	1	9.415	1	9.416	0	9.415	3	9.415	5	9.415	0	9.415	19
9.419	2	9.419	3	9.419	17	9.419	0	9.419	3	9.419	5	9.419	1	9.419	1	9.42	0	9.419	3	9.419	5	9.419	0	9.419	18
9.423	2	9.423	3	9.423	13	9.423	0	9.423	3	9.423	5	9.423	1	9.423	1	9.424	0	9.423	3	9.423	4	9.423	0	9.423	16
9.427	1	9.427	4	9.427	15	9.427	0	9.427	2	9.427	5	9.427	1	9.427	1	9.428	0	9.427	2	9.427	4	9.427	0	9.427	16
9.431	1	9.431	4	9.431	12	9.431	0	9.431	2	9.431	5	9.431	1	9.431	1	9.432	0	9.431	2	9.431	3	9.431	0	9.431	14
9.435	1	9.435	3	9.435	18	9.435	0	9.435	2	9.435	5	9.435	1	9.435	1	9.436	0	9.435	3	9.435	4	9.435	0	9.435	12
9.439	1	9.439	3	9.439	17	9.439	0	9.439	2	9.439	5	9.439	1	9.439	1	9.44	0	9.439	2	9.439	4	9.439	0	9.439	12
9.443	1	9.443	3	9.443	11	9.443	0	9.443	2	9.443	6	9.443	1	9.443	1	9.444	0	9.443	2	9.443	5	9.443	0	9.443	12
9.447	1	9.447	4	9.447	12	9.447	0	9.447	1	9.447	6	9.447	1	9.447	1	9.448	0	9.447	2	9.447	4	9.447	0	9.447	11
9.451	1	9.451	3	9.451	8	9.451	0	9.451	1	9.451	6	9.451	1	9.451	1	9.452	0	9.451	2	9.451	3	9.451	0	9.451	11
9.455	2	9.455	3	9.455	10	9.455	0	9.455	1	9.455	5	9.455	2	9.455	2	9.456	0	9.455	3	9.455	5	9.455	0	9.455	10
9.459	2	9.459	3	9.459	12	9.459	0	9.459	1	9.459	5	9.459	1	9.459	1	9.46	0	9.459	3	9.459	5	9.459	0	9.459	11
9.463	2	9.463	4	9.463	9	9.464	0	9.463	1	9.463	4	9.463	1	9.463	1	9.464	0	9.463	3	9.463	5	9.463	0	9.463	12
9.467	2	9.467	3	9.467	12	9.468	0	9.467	1	9.467	4	9.467	1	9.467	1	9.468	0	9.467	3	9.467	5	9.467	0	9.467	11
9.471	2	9.471	3	9.471	5	9.471	0	9.471	2	9.471	4	9.471	1	9.471	1	9.472	0	9.471	2	9.471	4	9.471	0	9.471	10
9.475	2	9.475	2	9.475	6	9.476	0	9.475	2	9.475	4	9.475	1	9.475	1	9.476	0	9.475	2	9.475	4	9.475	0	9.475	12
9.479	2	9.479	2	9.479	2	9.479	0	9.479	2	9.479	4	9.479	1	9.479	1	9.48	0	9.479	2	9.479	5	9.479	0	9.479	11
9.483	1	9.483	2	9.483	3	9.483	0	9.483	2	9.483	4	9.483	1	9.483	1	9.484	0	9.483	1	9.483	5	9.483	0	9.483	11
9.487	2	9.487	2	9.487	11	9.487	0	9.487	2	9.487	4	9.487	1	9.487	1	9.488	0	9.487	2	9.487	5	9.487	0	9.487	11
9.491	2	9.491	2	9.491	15	9.491	0	9.491	2	9.491	4	9.491	1	9.491	1	9.492	0	9.491	2	9.491	4	9.491	0	9.491	12
9.495	2	9.495	2	9.495	5	9.495	1	9.495	2	9.495	5	9.495	1	9.495	1	9.496	0	9.495	2	9.495	3	9.495	0	9.495	13
9.499	2	9.499	2	9.499	10	9.5	1	9.499	2	9.499	5	9.499	1	9.499	1	9.5	0	9.499	2	9.499	4	9.499	0	9.499	13
9.503	2	9.503	2	9.503	2	9.504	1	9.503	3	9.503	4	9.503	1	9.503	1	9.504	0	9.503	3	9.503	4	9.503	0	9.503	11
9.507	1	9.508	2	9.507	11	9.508	1	9.507	3	9.507	4	9.507	1	9.507	1	9.508	0	9.507	3	9.507	3	9.507	0	9.507	11
9.511	1	9.512	1	9.511	2	9.512	1	9.511	3	9.511	4	9.511	1	9.511	1	9.512	0	9.511	2	9.511	3	9.511	0	9.511	11
9.515	1	9.516	2	9.515	5	9.516	1	9.515	4	9.515	4	9.515	1	9.515	1	9.516	0	9.515	2	9.515	3	9.515	0	9.515	10
9.519	1	9.519	1	9.519	4	9.519	1	9.519	4	9.519	4	9.519	1	9.519	1	9.52	0	9.519	2	9.519	3	9.519	0	9.519	9
9.523	1	9.523	1	9.523	0	9.524	1	9.523	5	9.523	4	9.523	1	9.523	1	9.524	0	9.523	2	9.523	5	9.523	0	9.523	9
9.527	1	9.527	2	9.527	7	9.528	1	9.527	4	9.527	3	9.527	1	9.527	1	9.528	0	9.527	2	9.527	4	9.527	0	9.527	9
9.531	1	9.531	2	9.531	4	9.532	1	9.531	4	9.531	2	9.531	2	9.531	2	9.532	0	9.531	2	9.531	4	9.531	0	9.531	9
9.535	1	9.535	2	9.535	5	9.536	0	9.535	4	9.535	3	9.535	1	9.535	1	9.536	0	9.535	2	9.535	6	9.535	0	9.535	10
9.539	1	9.539	2	9.539	2	9.54	0	9.539	4	9.539	3	9.539	2	9.539	2	9.54	0	9.539	2	9.539	5	9.539	0	9.539	11
9.544	1	9.544	2	9.543	3	9.544	0	9.543	4	9.543	4	9.543	1	9.543	1	9.544	0	9.543	2	9.543	5	9.543	0	9.543	11
9.547	1	9.548	1	9.547	2	9.548	0	9.547	4	9.547	3	9.547	1	9.547	1	9.548	0	9.547	2	9.547	4	9.547	0	9.547	10
9.551	1	9.552	1	9.551	0	9.552	0	9.551	3	9.551	4	9.551	1	9.551	1	9.552	0	9.551	2	9.551	3	9.551	0	9.551	9
9.555	1	9.555	1	9.555	8	9.556	0	9.555	3	9.555	4	9.555	1	9.555	1	9.556	0	9.555	2	9.555	4	9.555	0	9.555	10
9.559	1	9.559	1	9.559	2	9.56	0	9.559	3	9.559	4	9.559	1	9.559	1	9.56	0	9.559	2	9.559	4	9.559	0	9.559	10
9.563	1	9.563	1	9.563	2	9.564	0	9.563	3	9.563	4	9.563	1	9.563	1	9.564	0	9.563	2	9.563	4	9.563	0	9.563	10
9.567	1	9.568	1	9.567	4	9.568	0	9.567	3	9.567	5	9.567	1	9.567	1	9.568	0	9.567	2	9.567	5	9.567	0	9.567	9
9.571	1	9.572	0	9.571	5	9.572	0	9.571	3	9.571	5	9.571	1	9.571	1	9.572	0	9.571	2	9.571	6	9.571	0	9.571	9
9.575	1	9.576	0	9.575	2	9.576	0	9.575	2	9.575	5	9.575	1	9.575	1	9.576	0	9.575	2	9.575	7	9.575	0	9.575	9
9.58	0	9.58	0	9.579	2	9.58	0	9.579	2	9.579	5	9.579	1	9.579	1	9.58	0	9.579	1	9.579	8	9.579	0	9.579	9
9.583	0	9.584	0	9.583	2	9.584	0	9.583	2	9.583	5	9.583	1	9.583	1	9.584	0	9.583	1	9.583	8	9.583	0	9.583	10
9.587	1	9.587	0	9.587	5	9.588	0	9.587	2	9.587	5	9.587	1	9.587	1	9.588	0	9.587	2	9.587	8	9.587	0	9.587	10
9.591	1	9.592	1	9.591	5	9.592	0	9.591	2	9.591	4	9.591	1	9.591	1	9.592	0	9.591	1	9.591	8	9.591	0	9.591	9
9.595	1	9.595	1	9.595	2	9.596	0	9.595	2	9.595	5	9.595	1	9.595	1	9.596	0	9.595	2	9.595	8	9.595	0	9.595	9
9.599	1	9.6	1	9.599	3	9.6	0	9.599	2	9.599	3	9.599	1	9.599	1	9.6	0	9.599	2	9.599	8	9.599	0	9.599	10
9.603	1	9.604	1	9.603	0	9.604	0	9.603	1	9.603	3	9.603	1	9.603	1	9.604	0	9.603	2	9.603	8	9.603	0	9.603	10
9.608	1	9.608	1	9.607	2	9.608	1	9.607	1	9.607	4	9.607	2	9.607	2	9.608	0	9.607	2	9.607	7	9.607	0	9.607	11
9.612	1	9.612	2	9.611	2	9.612	0	9.611	1	9.611	4	9.611	1	9.611	1	9.612	0	9.611	2	9.611	6	9.611	0	9.611	9
9.616	1	9.616	2	9.615	0	9.616	0	9.615	1	9.615	4	9.615	1	9.615	1	9.616	0	9.615	2	9.615	6	9.615	0	9.615	9
9.62	1	9.62	1	9.619	3	9.62	0	9.619	1	9.619	4	9.619	1	9.619	1	9.62	0	9.619	2	9.619	5	9.62	0	9.619	10
9.623	1	9.624	1	9.623	14	9.624	1	9.623	1	9.623	3	9.623	1	9.623	1	9.624	0	9.623	2	9.623	5	9.623	0	9.623	9
9.627	0	9.627	1	9.627	2	9.628	1	9.627	1	9.627	4	9.627	1	9.627	1	9.628	0	9.627	2	9.627	4	9.627	0	9.627	7
9.632	0	9.632	1	9.631	2	9.632	1	9.631	1	9.631	4	9.631	1	9.631	1	9.632	0	9.631	2	9.631	5	9.631	0	9.631	8
9.636	0	9.636	1	9.635	7	9.636	0	9.635	1	9.635	4	9.635	0	9.635	0	9.636	0	9.635	2	9.635	4	9.635	0	9.635	8
9.64	1	9.64	0	9.639	0	9.64	0	9.639	1	9.639	4	9.639	1	9.639	1	9.64	0	9.639	2	9.639	4	9.639	0	9.639	8
9.644	1	9.644	0	9.643	2	9.644	0	9.643	2	9.643	4	9.643	1	9.643	1	9.644	0	9.643	1	9.643	5	9.643	0	9.643	7
9.648	1	9.648	0	9.647	2	9.648	0	9.647	2	9.647	4	9.647	1	9.647	1	9.648	0	9.647	0	9.647	5	9.648	0	9.647	7
9.652	1	9.652	0	9.651	6	9.652	0	9.651	2	9.651	4	9.651	1	9.651	1	9.652	0	9.651	1	9.651	5	9.652	0	9.651	8
9.656	1	9.656	0	9.655	3	9.656	0	9.655	2	9.655	5	9.655	1	9.655	1	9.656	0	9.655	2	9.655	5	9.656	0	9.655	7
9.66	1	9.66	0	9.659	0	9.66	0	9.659	2	9.659	5	9.659	1	9.659	1	9.66	0	9.659	2	9.659	4	9.66	0	9.659	8
9.664	1	9.664	0	9.663	3	9.664	0	9.663	2	9.663	5	9.663	1	9.663	1	9.664	0	9.663	2	9.663	4	9.663	0	9.663	8
9.668	1	9.668	0	9.667	2	9.668	0	9.667	2	9.667	4	9.667	1	9.667	1	9.668	0	9.667	2	9.667	4	9.667	0	9.667	8
9.672	1	9.672	0	9.671	0	9.672	0	9.671	2	9.671	5	9.671	1	9.671	1	9.672	0	9.671	2	9.671	3	9.671	0	9.671	8
9.676	1	9.676	1	9.675	2	9.676	1	9.675	3	9.675	6	9.675	1	9.675	1	9.676	0	9.675	2	9.675	3	9.675	0	9.675	8

## Sheet: 2methylbutylacetate_74,02
2_17_16_mm1		2_17_16_mm2		2_17_16_mm3		2_17_16_SCAPWT		2_17_16_SCAPADH		2_17_16_SCAPLPWT		2_17_16_SCAPLPADH		2_17_16_AJM50p		2_16_16_SCAM		2_16_16_SC		2_16_16_AM		2_16_16_AJM		2_16_16_SCAMLP
8.503	1	8.503	1	8.503	0	8.503	5	8.503	0	8.502	1	8.503	4	8.503	3	8.502	16	8.503	0	8.503	37	8.503	0	8.503	39
8.507	1	8.507	1	8.507	0	8.507	5	8.507	0	8.506	1	8.507	4	8.507	2	8.506	16	8.507	0	8.507	38	8.507	0	8.507	42
8.511	1	8.511	1	8.511	0	8.511	5	8.511	1	8.51	2	8.511	4	8.511	2	8.51	16	8.511	0	8.511	29	8.511	0	8.511	41
8.515	1	8.515	0	8.515	0	8.515	4	8.515	1	8.514	1	8.515	4	8.515	2	8.514	15	8.515	0	8.515	19	8.515	0	8.515	40
8.519	0	8.519	0	8.519	2	8.519	4	8.519	1	8.518	1	8.519	4	8.519	2	8.518	17	8.519	0	8.519	42	8.519	0	8.519	39
8.523	0	8.523	1	8.523	4	8.523	3	8.523	1	8.522	1	8.523	4	8.523	1	8.522	16	8.523	0	8.523	29	8.523	0	8.523	39
8.527	0	8.527	1	8.527	0	8.527	3	8.527	1	8.526	1	8.527	4	8.527	1	8.526	17	8.527	0	8.527	27	8.527	1	8.527	38
8.531	1	8.531	1	8.531	2	8.531	2	8.531	1	8.53	1	8.531	3	8.531	1	8.53	14	8.531	0	8.531	27	8.531	1	8.531	38
8.535	1	8.535	1	8.535	0	8.535	2	8.535	1	8.534	1	8.535	4	8.535	1	8.534	15	8.535	0	8.535	27	8.535	1	8.535	36
8.539	2	8.539	1	8.539	4	8.539	2	8.539	1	8.538	1	8.539	4	8.539	1	8.538	15	8.539	0	8.539	28	8.539	1	8.539	37
8.543	2	8.543	1	8.543	10	8.543	3	8.543	1	8.542	4	8.543	3	8.543	1	8.542	15	8.543	0	8.543	30	8.543	1	8.543	39
8.547	6	8.547	2	8.547	21	8.547	3	8.547	1	8.546	8	8.547	3	8.547	1	8.546	13	8.547	0	8.547	27	8.547	1	8.547	39
8.551	14	8.551	3	8.551	45	8.551	3	8.551	0	8.55	14	8.551	3	8.551	1	8.55	15	8.551	0	8.551	19	8.551	1	8.551	40
8.555	22	8.555	7	8.555	94	8.555	4	8.555	0	8.554	22	8.555	3	8.555	1	8.554	17	8.555	0	8.555	24	8.555	1	8.555	39
8.559	35	8.559	12	8.559	108	8.559	5	8.559	0	8.558	39	8.559	2	8.559	1	8.558	23	8.559	0	8.559	22	8.559	1	8.559	40
8.563	56	8.563	19	8.563	180	8.563	6	8.563	0	8.562	63	8.563	3	8.563	2	8.562	29	8.563	0	8.563	20	8.563	1	8.563	44
8.567	74	8.567	30	8.567	297	8.567	8	8.567	0	8.566	96	8.567	3	8.567	2	8.566	36	8.567	0	8.567	23	8.567	1	8.567	48
8.571	107	8.571	47	8.571	394	8.571	9	8.571	0	8.57	135	8.571	4	8.571	2	8.57	51	8.571	0	8.571	29	8.571	1	8.571	54
8.575	165	8.575	66	8.575	549	8.575	12	8.575	1	8.574	197	8.575	4	8.575	1	8.574	71	8.575	0	8.575	34	8.575	1	8.575	67
8.579	249	8.579	89	8.579	752	8.579	15	8.579	1	8.578	268	8.579	5	8.579	1	8.578	91	8.579	0	8.579	29	8.579	1	8.579	82
8.583	351	8.583	112	8.583	1001	8.583	21	8.583	1	8.582	350	8.583	5	8.583	2	8.582	116	8.583	0	8.583	25	8.583	1	8.583	105
8.587	477	8.587	139	8.587	1407	8.587	24	8.587	1	8.586	439	8.587	6	8.587	2	8.586	146	8.587	0	8.587	30	8.587	1	8.587	130
8.591	605	8.591	179	8.591	1674	8.591	29	8.591	2	8.59	522	8.591	6	8.591	1	8.59	175	8.591	0	8.591	28	8.591	1	8.591	150
8.595	752	8.595	213	8.595	1959	8.595	36	8.595	2	8.594	601	8.595	6	8.595	1	8.594	224	8.595	0	8.595	26	8.595	1	8.595	180
8.599	928	8.599	226	8.599	1995	8.599	41	8.599	2	8.598	679	8.599	6	8.599	1	8.598	278	8.599	0	8.599	21	8.599	1	8.599	225
8.603	1095	8.603	236	8.603	2388	8.603	49	8.603	2	8.602	722	8.603	6	8.603	1	8.602	318	8.603	0	8.603	28	8.603	1	8.603	267
8.607	1215	8.607	241	8.607	2607	8.607	56	8.607	3	8.606	733	8.607	7	8.607	1	8.606	351	8.607	0	8.607	21	8.607	1	8.607	301
8.611	1284	8.611	241	8.611	2568	8.611	59	8.611	3	8.61	725	8.611	9	8.611	1	8.61	388	8.611	0	8.611	24	8.611	1	8.611	303
8.615	1311	8.615	231	8.615	2705	8.615	62	8.615	3	8.614	691	8.615	10	8.615	1	8.614	404	8.615	0	8.615	23	8.615	0	8.615	310
8.619	1354	8.619	205	8.619	2924	8.619	64	8.619	2	8.618	634	8.619	10	8.619	1	8.618	406	8.619	0	8.619	35	8.619	0	8.619	314
8.623	1370	8.623	177	8.623	2847	8.623	63	8.623	1	8.622	564	8.623	10	8.623	1	8.622	394	8.623	0	8.623	29	8.623	0	8.623	299
8.627	1315	8.627	161	8.627	3061	8.627	60	8.627	1	8.626	469	8.627	10	8.627	0	8.626	358	8.627	0	8.627	32	8.627	0	8.627	272
8.631	1217	8.631	146	8.631	3148	8.631	54	8.631	2	8.63	381	8.631	11	8.631	1	8.63	316	8.631	0	8.631	33	8.631	0	8.631	238
8.635	1119	8.635	130	8.635	2994	8.635	47	8.635	2	8.634	311	8.635	10	8.635	0	8.634	284	8.635	0	8.635	28	8.635	1	8.635	208
8.639	1039	8.639	124	8.639	3030	8.639	42	8.639	2	8.639	241	8.639	7	8.639	0	8.638	236	8.639	0	8.639	19	8.639	1	8.639	198
8.643	943	8.643	130	8.643	3112	8.643	35	8.643	3	8.642	181	8.643	7	8.643	1	8.642	199	8.643	0	8.643	26	8.643	1	8.643	173
8.647	815	8.647	145	8.647	2892	8.647	29	8.647	3	8.646	142	8.647	6	8.647	1	8.646	175	8.647	0	8.647	22	8.647	1	8.647	155
8.651	721	8.651	192	8.651	2166	8.651	25	8.651	4	8.65	112	8.651	5	8.651	1	8.65	142	8.651	0	8.651	23	8.651	1	8.651	146
8.655	696	8.655	288	8.655	1775	8.655	20	8.655	4	8.654	102	8.655	6	8.655	1	8.654	122	8.655	0	8.655	24	8.655	1	8.655	138
8.659	743	8.659	447	8.659	1348	8.659	17	8.659	3	8.658	105	8.659	5	8.659	1	8.658	116	8.659	0	8.659	26	8.659	1	8.659	133
8.663	893	8.663	724	8.663	841	8.663	16	8.663	2	8.662	116	8.663	5	8.663	1	8.662	119	8.663	1	8.663	13	8.663	1	8.663	146
8.667	1172	8.667	1061	8.667	556	8.667	15	8.667	2	8.666	146	8.667	6	8.667	1	8.666	131	8.667	0	8.667	27	8.667	1	8.667	173
8.671	1666	8.671	1485	8.671	235	8.671	15	8.671	2	8.67	187	8.671	5	8.671	1	8.67	161	8.671	0	8.671	24	8.671	1	8.671	225
8.675	2410	8.675	2026	8.675	232	8.675	17	8.675	2	8.675	252	8.675	5	8.675	0	8.674	203	8.675	0	8.675	30	8.675	1	8.675	297
8.679	4396	8.679	2382	8.679	320	8.679	19	8.679	1	8.678	324	8.679	7	8.679	0	8.678	280	8.679	0	8.679	29	8.679	1	8.679	404
8.683	6692	8.683	2704	8.683	376	8.683	23	8.683	2	8.682	416	8.683	7	8.683	0	8.682	373	8.683	0	8.683	25	8.683	1	8.683	572
8.687	8063	8.687	3455	8.687	543	8.687	27	8.687	2	8.686	501	8.687	8	8.687	0	8.686	498	8.687	0	8.687	31	8.687	1	8.687	751
8.691	9652	8.691	4117	8.691	778	8.691	33	8.691	3	8.69	601	8.691	8	8.691	1	8.69	624	8.691	0	8.691	25	8.691	1	8.691	949
8.695	11383	8.695	4759	8.695	1747	8.695	39	8.695	3	8.694	675	8.695	10	8.695	1	8.694	773	8.695	0	8.695	34	8.695	1	8.695	1179
8.699	13165	8.699	5264	8.699	1982	8.699	47	8.699	3	8.698	740	8.699	13	8.699	2	8.699	915	8.699	0	8.699	31	8.699	1	8.699	1421
8.703	14879	8.703	5536	8.703	2476	8.703	50	8.703	4	8.702	778	8.703	15	8.703	3	8.703	1055	8.703	1	8.703	19	8.703	0	8.703	1638
8.707	15658	8.707	5941	8.707	2829	8.707	57	8.707	5	8.706	805	8.707	17	8.707	6	8.707	1165	8.707	1	8.707	23	8.707	1	8.707	1820
8.711	16266	8.711	6262	8.711	2951	8.711	63	8.711	5	8.71	795	8.711	18	8.711	9	8.71	1244	8.711	1	8.711	28	8.711	1	8.711	1923
8.715	17882	8.715	5983	8.715	2859	8.715	69	8.715	6	8.714	768	8.715	19	8.715	13	8.714	1298	8.715	1	8.715	26	8.715	1	8.715	2005
8.719	19292	8.719	5540	8.719	2518	8.719	71	8.719	6	8.718	702	8.719	23	8.719	15	8.718	1326	8.719	1	8.719	22	8.719	0	8.719	2057
8.723	20531	8.723	4969	8.723	2312	8.723	74	8.723	5	8.722	641	8.723	24	8.723	17	8.722	1285	8.723	1	8.723	20	8.723	0	8.723	2023
8.727	21481	8.727	4331	8.727	2143	8.727	74	8.727	5	8.726	573	8.727	25	8.727	20	8.727	1210	8.727	1	8.727	11	8.727	0	8.727	1905
8.731	21890	8.731	3718	8.731	1961	8.731	74	8.731	4	8.73	491	8.731	26	8.731	22	8.731	1104	8.731	0	8.731	16	8.731	0	8.731	1765
8.735	21409	8.735	3059	8.735	1458	8.735	71	8.735	3	8.734	406	8.735	26	8.735	21	8.735	978	8.735	0	8.735	23	8.735	0	8.735	1593
8.739	20304	8.739	2398	8.739	707	8.739	63	8.739	3	8.738	333	8.739	25	8.739	20	8.739	847	8.739	0	8.739	20	8.739	0	8.739	1403
8.743	18637	8.743	1828	8.743	571	8.743	56	8.743	2	8.742	271	8.743	24	8.743	18	8.743	699	8.743	0	8.743	23	8.743	0	8.743	1198
8.747	16409	8.747	1373	8.747	418	8.747	48	8.747	2	8.747	221	8.747	21	8.747	17	8.747	556	8.747	0	8.747	18	8.747	1	8.747	971
8.751	13760	8.751	986	8.751	333	8.751	41	8.751	2	8.75	182	8.751	17	8.751	17	8.75	443	8.751	0	8.751	29	8.751	1	8.751	782
8.755	10918	8.755	698	8.755	248	8.755	36	8.755	2	8.754	140	8.755	14	8.755	15	8.754	354	8.755	0	8.755	31	8.755	1	8.755	627
8.759	8327	8.759	485	8.759	204	8.759	31	8.759	2	8.758	115	8.759	12	8.759	13	8.759	279	8.759	0	8.759	15	8.759	1	8.759	485
8.763	6058	8.763	338	8.763	141	8.763	26	8.763	2	8.762	95	8.763	10	8.763	14	8.763	216	8.763	0	8.763	18	8.763	1	8.763	375
8.767	4199	8.767	263	8.767	111	8.767	23	8.767	2	8.766	76	8.767	8	8.767	14	8.767	172	8.767	0	8.767	22	8.767	1	8.767	296
8.771	2748	8.771	200	8.771	85	8.771	21	8.771	2	8.77	62	8.771	9	8.771	14	8.771	136	8.771	0	8.771	21	8.771	0	8.771	233
8.775	1749	8.775	158	8.775	73	8.775	20	8.775	1	8.774	50	8.775	9	8.775	13	8.775	108	8.775	0	8.775	23	8.775	0	8.775	185
8.779	1072	8.779	125	8.779	48	8.779	19	8.779	1	8.778	39	8.779	9	8.779	13	8.779	89	8.779	0	8.779	20	8.779	0	8.779	144
8.783	636	8.783	106	8.783	39	8.783	16	8.783	1	8.782	32	8.783	9	8.783	12	8.783	73	8.783	0	8.783	25	8.783	0	8.783	118
8.787	310	8.787	90	8.787	37	8.787	14	8.787	1	8.786	27	8.787	8	8.787	11	8.787	61	8.787	0	8.787	23	8.787	0	8.787	107
8.791	220	8.791	77	8.791	32	8.791	13	8.791	1	8.79	22	8.791	8	8.791	10	8.791	54	8.791	0	8.791	14	8.791	0	8.791	93
8.795	160	8.795	67	8.795	25	8.795	13	8.795	1	8.794	20	8.795	8	8.795	9	8.795	47	8.795	0	8.795	19	8.795	0	8.795	80
8.799	122	8.799	63	8.799	29	8.799	11	8.799	1	8.798	17	8.799	7	8.799	7	8.799	42	8.799	0	8.799	24	8.799	0	8.799	73
8.803	98	8.803	55	8.803	11	8.803	9	8.803	2	8.802	16	8.803	6	8.803	6	8.803	37	8.803	0	8.803	27	8.803	0	8.803	66
8.807	83	8.807	50	8.807	19	8.807	8	8.807	2	8.806	14	8.807	5	8.807	6	8.807	34	8.807	0	8.807	15	8.807	0	8.807	59
8.811	72	8.811	47	8.811	18	8.811	7	8.811	2	8.81	14	8.811	5	8.811	5	8.811	30	8.811	0	8.811	28	8.811	0	8.811	56
8.815	64	8.815	41	8.815	8	8.815	7	8.815	2	8.814	14	8.815	5	8.815	4	8.815	28	8.815	0	8.815	29	8.815	0	8.815	51
8.819	59	8.819	39	8.819	11	8.819	6	8.819	2	8.818	13	8.819	4	8.819	2	8.819	26	8.819	0	8.819	29	8.819	0	8.819	48
8.823	55	8.823	38	8.823	19	8.823	6	8.823	2	8.823	13	8.823	4	8.823	1	8.823	25	8.823	0	8.823	21	8.823	1	8.823	43
8.827	52	8.827	32	8.827	8	8.827	6	8.827	2	8.826	12	8.827	5	8.827	2	8.827	24	8.827	0	8.827	21	8.827	1	8.827	41
8.831	48	8.831	30	8.831	6	8.831	6	8.831	2	8.83	11	8.831	5	8.831	2	8.831	23	8.831	0	8.831	27	8.831	1	8.831	41
8.835	45	8.835	28	8.835	9	8.835	7	8.835	2	8.834	11	8.835	5	8.835	2	8.835	22	8.835	0	8.835	21	8.835	1	8.835	39
8.839	42	8.839	24	8.839	7	8.839	7	8.839	1	8.838	10	8.839	5	8.839	1	8.839	25	8.839	0	8.839	20	8.839	0	8.839	37
8.843	39	8.843	26	8.843	4	8.843	7	8.843	1	8.842	10	8.843	5	8.843	2	8.843	24	8.843	0	8.843	16	8.843	0	8.843	36
8.847	36	8.847	24	8.847	11	8.847	7	8.847	1	8.846	10	8.847	4	8.847	2	8.847	22	8.847	0	8.847	23	8.847	1	8.847	36
8.851	34	8.851	22	8.851	10	8.851	7	8.851	1	8.85	9	8.851	4	8.851	2	8.851	21	8.851	0	8.851	22	8.851	0	8.851	35
8.855	32	8.855	22	8.855	8	8.855	7	8.855	1	8.855	9	8.855	3	8.855	1	8.855	20	8.855	0	8.855	22	8.855	0	8.855	36
8.859	32	8.859	21	8.859	7	8.859	7	8.859	1	8.858	8	8.859	4	8.859	2	8.859	19	8.859	0	8.859	29	8.859	0	8.859	34
8.863	30	8.863	20	8.863	4	8.863	7	8.863	1	8.863	8	8.863	4	8.863	2	8.863	19	8.863	0	8.863	20	8.863	0	8.863	35
8.867	26	8.867	19	8.867	2	8.867	7	8.867	1	8.866	8	8.867	4	8.867	3	8.867	17	8.867	0	8.867	11	8.867	0	8.867	38
8.871	23	8.871	15	8.871	4	8.871	6	8.871	1	8.87	7	8.871	4	8.871	2	8.871	18	8.871	0	8.871	19	8.871	0	8.871	36
8.875	23	8.875	14	8.875	4	8.875	6	8.875	1	8.874	6	8.875	4	8.875	3	8.875	19	8.875	0	8.875	17	8.875	0	8.875	35
8.879	23	8.879	14	8.879	0	8.879	5	8.879	1	8.878	5	8.879	4	8.879	3	8.879	19	8.879	0	8.879	14	8.879	0	8.879	35
8.883	19	8.883	11	8.883	0	8.883	5	8.883	1	8.882	4	8.883	3	8.883	3	8.883	19	8.883	0	8.883	20	8.883	0	8.883	34
8.887	18	8.887	10	8.887	6	8.887	5	8.887	1	8.886	6	8.887	2	8.887	3	8.887	18	8.887	0	8.887	16	8.887	0	8.887	33
8.891	17	8.891	10	8.891	4	8.891	5	8.891	1	8.891	6	8.891	2	8.891	2	8.891	18	8.891	0	8.891	22	8.891	0	8.891	33
8.895	18	8.895	9	8.895	7	8.895	5	8.895	1	8.894	6	8.895	2	8.895	2	8.895	18	8.895	0	8.895	19	8.895	0	8.895	30
8.899	17	8.899	8	8.899	9	8.899	5	8.899	1	8.899	6	8.899	2	8.899	2	8.899	18	8.899	0	8.899	16	8.899	0	8.899	29

## Sheet: 2-phenethylac_104.06
2_17_mm1		2_17mm2		2_17mm3		2_17SCAPADH		2_17_SCAPWT		2_17_SCAPLPWT		2_17_SCAPLPADH		2_17_AJM50p		2_16_ajm		2_16am		2_16_Sc		2_16_SCAM		2_16_SCAMLP
25.66	36	25.657	6	25.66	17	25.66	43	25.66	42	25.66	23	25.66	19	25.66	2	25.66	1	25.66	2	25.661	106	25.659	47	25.657	47
25.664	34	25.661	6	25.664	17	25.664	43	25.664	40	25.664	24	25.664	19	25.664	2	25.664	2	25.664	1	25.665	105	25.663	44	25.661	46
25.668	33	25.665	7	25.668	16	25.668	42	25.668	40	25.668	24	25.668	20	25.668	2	25.668	2	25.668	1	25.669	107	25.667	46	25.665	47
25.672	34	25.669	5	25.672	16	25.672	43	25.672	39	25.672	25	25.672	19	25.672	2	25.672	3	25.672	1	25.673	107	25.671	48	25.669	47
25.676	34	25.673	6	25.676	17	25.676	43	25.676	39	25.676	26	25.676	20	25.676	2	25.676	3	25.676	1	25.677	112	25.675	49	25.673	46
25.68	35	25.677	7	25.68	15	25.68	41	25.68	42	25.68	26	25.68	20	25.68	2	25.68	3	25.68	1	25.681	111	25.679	48	25.677	47
25.684	34	25.681	7	25.684	15	25.684	43	25.684	43	25.684	27	25.684	20	25.684	1	25.684	3	25.684	1	25.685	109	25.683	45	25.681	47
25.688	33	25.685	8	25.688	15	25.688	46	25.688	43	25.688	28	25.688	20	25.688	1	25.688	3	25.688	0	25.689	113	25.687	45	25.685	46
25.692	34	25.689	8	25.692	15	25.692	46	25.692	45	25.692	28	25.692	21	25.692	2	25.692	2	25.692	0	25.693	111	25.691	45	25.689	47
25.696	34	25.693	7	25.696	14	25.696	44	25.696	45	25.696	29	25.696	20	25.696	2	25.696	2	25.696	0	25.697	108	25.695	46	25.693	47
25.7	34	25.697	7	25.7	14	25.7	43	25.7	44	25.7	30	25.7	20	25.7	2	25.7	1	25.7	0	25.701	111	25.699	45	25.697	47
25.704	34	25.701	7	25.704	14	25.704	43	25.704	47	25.704	29	25.704	21	25.704	2	25.704	1	25.704	0	25.705	107	25.703	44	25.701	49
25.708	32	25.705	5	25.708	15	25.708	42	25.708	46	25.708	29	25.708	22	25.708	1	25.708	1	25.708	0	25.709	111	25.707	46	25.705	50
25.712	33	25.709	5	25.713	16	25.712	41	25.712	46	25.712	30	25.712	21	25.712	1	25.712	1	25.712	0	25.713	114	25.711	47	25.709	50
25.716	35	25.713	5	25.717	16	25.716	39	25.716	45	25.716	29	25.716	22	25.716	1	25.716	1	25.716	0	25.717	110	25.715	49	25.713	49
25.72	34	25.717	5	25.721	16	25.72	40	25.72	44	25.72	29	25.72	21	25.72	1	25.72	1	25.72	1	25.721	109	25.719	51	25.717	50
25.724	36	25.721	7	25.724	17	25.724	41	25.724	44	25.724	29	25.724	23	25.724	1	25.724	1	25.724	1	25.725	109	25.723	50	25.721	50
25.728	37	25.725	8	25.728	16	25.728	42	25.728	46	25.728	28	25.728	25	25.728	1	25.728	1	25.728	1	25.729	105	25.727	49	25.725	49
25.732	37	25.729	8	25.732	16	25.732	42	25.732	43	25.732	27	25.732	26	25.732	1	25.732	2	25.732	1	25.733	107	25.731	49	25.729	51
25.736	37	25.733	9	25.736	15	25.736	41	25.736	43	25.736	28	25.736	27	25.736	1	25.736	2	25.736	1	25.737	105	25.735	51	25.733	52
25.74	38	25.737	10	25.74	15	25.74	40	25.74	45	25.74	26	25.74	26	25.74	2	25.74	2	25.74	1	25.741	102	25.739	53	25.737	51
25.744	37	25.741	10	25.744	16	25.744	43	25.744	46	25.744	25	25.744	26	25.744	2	25.744	2	25.744	1	25.745	106	25.743	52	25.741	53
25.748	38	25.745	10	25.748	14	25.748	44	25.748	48	25.748	27	25.748	26	25.748	2	25.748	2	25.748	1	25.749	106	25.747	54	25.745	53
25.752	36	25.749	10	25.753	15	25.752	45	25.752	50	25.752	26	25.752	24	25.752	2	25.752	2	25.752	1	25.753	105	25.751	54	25.749	52
25.756	35	25.753	10	25.757	17	25.756	46	25.756	52	25.756	26	25.756	24	25.756	2	25.756	2	25.756	1	25.757	105	25.755	58	25.753	53
25.76	35	25.757	11	25.76	19	25.76	46	25.76	53	25.76	27	25.76	22	25.76	2	25.76	2	25.76	1	25.761	105	25.759	60	25.757	50
25.764	36	25.761	10	25.764	20	25.764	49	25.764	53	25.764	27	25.764	21	25.764	2	25.764	3	25.764	0	25.765	106	25.763	59	25.761	49
25.768	33	25.765	10	25.768	21	25.768	49	25.768	53	25.768	28	25.768	21	25.768	1	25.768	2	25.768	0	25.769	106	25.767	58	25.765	52
25.772	32	25.769	11	25.772	21	25.772	49	25.772	52	25.772	30	25.772	21	25.772	1	25.772	2	25.772	0	25.773	106	25.771	57	25.769	53
25.776	42	25.773	10	25.776	20	25.776	46	25.776	51	25.776	31	25.776	21	25.776	1	25.776	2	25.776	0	25.777	106	25.775	57	25.773	54
25.78	156	25.777	10	25.78	18	25.78	44	25.78	46	25.78	98	25.78	21	25.78	1	25.78	2	25.78	0	25.781	109	25.779	99	25.777	65
25.784	1100	25.781	12	25.784	17	25.784	44	25.784	47	25.784	636	25.784	21	25.784	1	25.784	2	25.784	0	25.785	117	25.783	415	25.781	211
25.788	4761	25.785	38	25.789	18	25.788	44	25.788	51	25.788	2471	25.788	22	25.788	1	25.788	2	25.788	1	25.789	144	25.787	2195	25.785	1407
25.792	13132	25.789	209	25.792	49	25.792	44	25.792	68	25.792	6661	25.792	21	25.792	1	25.792	2	25.792	1	25.793	248	25.791	8018	25.789	6060
25.796	24835	25.793	829	25.796	172	25.796	45	25.796	160	25.796	13650	25.796	23	25.796	1	25.796	2	25.796	1	25.797	488	25.795	18250	25.793	15537
25.8	37218	25.797	2221	25.8	467	25.8	43	25.8	430	25.8	21705	25.8	23	25.8	1	25.8	2	25.8	1	25.801	813	25.799	30422	25.797	27693
25.804	49444	25.801	4335	25.804	948	25.804	44	25.804	865	25.804	28956	25.804	23	25.804	1	25.804	3	25.804	1	25.805	1206	25.803	42614	25.801	40346
25.808	59702	25.805	6670	25.808	1535	25.808	44	25.808	1426	25.808	34265	25.808	24	25.808	1	25.808	2	25.808	1	25.809	1574	25.807	53957	25.805	52709
25.812	65917	25.809	8696	25.813	2188	25.812	44	25.812	2066	25.812	37316	25.812	26	25.812	1	25.812	2	25.812	1	25.813	1891	25.811	62180	25.809	63341
25.816	66657	25.813	10235	25.817	2803	25.816	45	25.816	2667	25.816	37978	25.816	28	25.816	1	25.816	1	25.816	1	25.817	2152	25.815	65469	25.813	69346
25.82	61144	25.817	11319	25.821	3235	25.82	50	25.82	3119	25.82	35634	25.82	35	25.82	1	25.82	1	25.82	1	25.821	2320	25.819	62713	25.817	68532
25.824	51510	25.821	11729	25.825	3468	25.824	56	25.824	3432	25.824	30172	25.824	49	25.824	2	25.824	2	25.824	1	25.825	2304	25.823	54716	25.821	61542
25.828	40732	25.825	11178	25.829	3498	25.828	69	25.828	3542	25.828	23357	25.828	67	25.828	1	25.828	1	25.828	1	25.829	2171	25.827	44259	25.825	51251
25.832	29799	25.829	9761	25.833	3311	25.832	84	25.832	3430	25.832	17143	25.832	86	25.832	1	25.832	1	25.832	1	25.833	1936	25.831	33350	25.829	40163
25.836	20496	25.833	8064	25.836	2992	25.836	101	25.836	3172	25.836	12718	25.836	103	25.836	1	25.836	2	25.836	0	25.837	1696	25.835	22965	25.833	29054
25.84	14339	25.837	6595	25.84	2589	25.84	114	25.84	2784	25.84	9945	25.84	121	25.84	1	25.84	2	25.84	1	25.841	1501	25.839	15330	25.837	19298
25.844	10858	25.841	5503	25.844	2186	25.844	126	25.844	2418	25.844	8126	25.844	137	25.844	2	25.844	2	25.844	1	25.845	1330	25.843	11066	25.841	12964
25.848	8773	25.845	4670	25.849	1913	25.848	139	25.848	2162	25.848	6887	25.848	147	25.848	2	25.848	3	25.848	1	25.849	1168	25.847	8672	25.845	9875
25.852	7406	25.849	4013	25.853	1750	25.852	146	25.852	1942	25.852	5931	25.852	150	25.852	1	25.852	2	25.852	1	25.853	1038	25.851	7038	25.849	8018
25.856	6420	25.853	3508	25.857	1594	25.856	146	25.856	1733	25.856	5249	25.856	149	25.856	2	25.857	2	25.856	1	25.857	924	25.855	5834	25.853	6706
25.86	5653	25.857	3104	25.861	1458	25.86	144	25.86	1579	25.86	4706	25.86	150	25.86	3	25.861	2	25.86	2	25.861	843	25.859	4987	25.857	5645
25.864	5064	25.861	2743	25.865	1334	25.864	143	25.864	1444	25.864	4213	25.864	148	25.864	2	25.864	2	25.864	2	25.865	779	25.863	4381	25.861	4861
25.868	4504	25.865	2438	25.868	1225	25.868	149	25.868	1336	25.868	3851	25.868	142	25.868	2	25.868	1	25.868	2	25.869	715	25.867	3836	25.865	4321
25.872	4006	25.869	2235	25.873	1138	25.872	147	25.872	1235	25.872	3588	25.872	141	25.872	2	25.872	1	25.872	2	25.873	658	25.871	3389	25.869	3893
25.876	3618	25.873	2061	25.877	1065	25.876	140	25.876	1146	25.876	3385	25.876	138	25.876	2	25.876	1	25.876	2	25.877	602	25.875	3064	25.873	3510
25.88	3248	25.877	1914	25.881	983	25.88	139	25.88	1080	25.88	3184	25.88	136	25.88	2	25.88	1	25.88	2	25.881	559	25.879	2773	25.877	3228
25.884	2955	25.881	1797	25.885	922	25.884	140	25.884	1034	25.884	2952	25.884	132	25.884	2	25.884	0	25.884	2	25.885	524	25.883	2591	25.881	3068
25.888	2729	25.885	1705	25.889	874	25.888	138	25.888	972	25.888	2764	25.888	128	25.888	1	25.889	0	25.888	1	25.889	494	25.887	2463	25.885	2841
25.892	2536	25.889	1613	25.893	825	25.892	133	25.892	916	25.892	2604	25.892	127	25.892	1	25.893	1	25.892	1	25.893	465	25.891	2338	25.889	2637
25.896	2409	25.893	1540	25.897	784	25.896	129	25.896	873	25.896	2438	25.896	126	25.896	1	25.896	1	25.896	1	25.897	432	25.895	2235	25.893	2455
25.9	2282	25.897	1437	25.901	750	25.9	124	25.9	828	25.9	2300	25.9	120	25.9	2	25.9	2	25.9	1	25.901	401	25.899	2116	25.897	2302
25.904	2181	25.901	1352	25.905	721	25.904	122	25.904	800	25.904	2174	25.904	113	25.904	2	25.904	2	25.904	2	25.905	377	25.903	2000	25.901	2190
25.908	2119	25.905	1285	25.909	692	25.908	116	25.908	761	25.908	2063	25.908	110	25.908	2	25.908	2	25.908	2	25.909	361	25.907	1903	25.905	2088
25.912	2040	25.909	1222	25.913	668	25.912	115	25.912	723	25.912	1986	25.912	106	25.912	2	25.912	2	25.912	1	25.913	339	25.911	1773	25.909	1925
25.916	1968	25.913	1170	25.917	645	25.916	107	25.916	703	25.916	1892	25.916	99	25.916	2	25.916	2	25.916	2	25.917	321	25.915	1643	25.913	1872
25.92	1901	25.917	1124	25.921	626	25.92	105	25.92	672	25.92	1801	25.92	97	25.92	2	25.92	2	25.92	1	25.921	303	25.919	1546	25.917	1804
25.924	1814	25.921	1072	25.925	602	25.924	99	25.924	632	25.924	1722	25.924	92	25.924	2	25.925	2	25.924	2	25.925	293	25.923	1453	25.921	1691
25.928	1735	25.925	1037	25.929	585	25.928	100	25.928	605	25.928	1638	25.928	91	25.928	1	25.929	1	25.928	2	25.929	284	25.927	1372	25.925	1597
25.932	1648	25.929	997	25.933	571	25.932	99	25.932	575	25.932	1555	25.932	92	25.932	2	25.933	1	25.932	1	25.933	273	25.931	1277	25.929	1528
25.936	1572	25.933	963	25.937	557	25.936	99	25.936	564	25.936	1480	25.936	89	25.936	1	25.937	2	25.936	2	25.937	255	25.935	1207	25.933	1466
25.94	1517	25.937	915	25.941	536	25.94	96	25.94	546	25.94	1409	25.94	86	25.94	1	25.94	2	25.94	2	25.941	246	25.939	1133	25.937	1406
25.944	1451	25.941	878	25.945	508	25.944	98	25.944	522	25.944	1361	25.944	84	25.944	1	25.945	2	25.944	2	25.945	236	25.943	1078	25.941	1337
25.948	1401	25.945	848	25.949	495	25.948	95	25.948	500	25.948	1319	25.948	79	25.948	1	25.949	1	25.948	1	25.949	230	25.947	1027	25.945	1277
25.952	1339	25.949	821	25.953	476	25.952	94	25.952	490	25.952	1263	25.952	79	25.952	1	25.953	1	25.952	1	25.953	224	25.951	989	25.949	1239
25.956	1274	25.953	789	25.957	453	25.956	90	25.956	475	25.956	1229	25.956	75	25.956	1	25.957	1	25.956	1	25.957	217	25.955	933	25.953	1193
25.96	1223	25.957	756	25.961	436	25.96	87	25.96	461	25.96	1187	25.96	73	25.96	1	25.961	1	25.96	2	25.961	216	25.959	892	25.957	1145
25.964	1174	25.961	728	25.965	427	25.964	86	25.964	444	25.964	1142	25.964	71	25.964	1	25.965	0	25.964	2	25.965	215	25.963	849	25.961	1083
25.968	1122	25.965	706	25.969	416	25.968	84	25.968	431	25.968	1105	25.968	71	25.968	1	25.969	0	25.968	2	25.969	215	25.967	821	25.965	1033
25.972	1089	25.969	681	25.973	403	25.972	82	25.972	415	25.972	1061	25.972	71	25.972	1	25.972	1	25.972	2	25.973	214	25.971	798	25.969	992
25.976	1057	25.973	663	25.977	384	25.976	81	25.976	404	25.976	1022	25.976	70	25.976	1	25.977	1	25.976	2	25.977	208	25.975	772	25.973	957
25.98	1025	25.977	642	25.981	374	25.98	81	25.98	400	25.98	1000	25.98	68	25.98	1	25.981	1	25.98	2	25.981	201	25.979	740	25.977	921
25.984	1005	25.981	617	25.985	371	25.984	82	25.984	390	25.984	959	25.984	65	25.984	1	25.985	1	25.984	3	25.985	199	25.983	730	25.981	891
25.988	974	25.985	605	25.989	363	25.988	84	25.988	382	25.988	914	25.988	64	25.988	1	25.989	1	25.988	3	25.989	191	25.987	720	25.985	861
25.992	952	25.989	582	25.993	349	25.992	80	25.992	369	25.992	894	25.992	62	25.992	1	25.993	1	25.992	3	25.993	187	25.991	697	25.989	843
25.996	924	25.993	564	25.997	336	25.996	77	25.996	355	25.996	856	25.996	60	25.996	1	25.997	2	25.996	3	25.997	182	25.995	683	25.993	831
26	891	25.997	551	26.001	333	26	77	26	347	26	848	26	58	26	1	26.001	2	26	2	26.001	178	25.999	657	25.997	813
26.004	852	26.001	533	26.005	334	26.004	77	26.004	344	26.004	825	26.004	57	26.004	1	26.005	2	26.004	3	26.005	179	26.003	636	26.001	788
26.008	823	26.005	518	26.009	325	26.008	73	26.008	331	26.008	800	26.008	58	26.008	1	26.008	2	26.008	3	26.009	176	26.007	606	26.005	768
26.012	798	26.009	507	26.013	316	26.012	70	26.012	323	26.012	791	26.012	57	26.012	1	26.013	2	26.012	2	26.013	171	26.011	581	26.009	730
26.016	790	26.013	500	26.017	306	26.016	68	26.016	317	26.016	779	26.016	56	26.016	1	26.017	2	26.016	2	26.017	174	26.015	558	26.013	707
26.02	760	26.017	491	26.021	301	26.02	68	26.02	309	26.02	757	26.02	51	26.02	1	26.021	2	26.02	2	26.021	172	26.019	541	26.017	673
26.024	753	26.021	487	26.025	298	26.024	69	26.024	296	26.024	751	26.024	52	26.024	1	26.025	2	26.024	2	26.025	169	26.023	517	26.021	641
26.028	739	26.025	475	26.029	292	26.028	67	26.028	290	26.028	730	26.028	51	26.028	1	26.029	1	26.028	2	26.029	163	26.027	502	26.025	617
26.032	728	26.029	462	26.033	288	26.032	66	26.032	284	26.032	708	26.032	50	26.032	1	26.033	2	26.032	2	26.033	159	26.031	488	26.029	601
26.036	708	26.033	451	26.037	283	26.036	66	26.036	277	26.036	686	26.036	48	26.036	1	26.037	2	26.036	2	26.037	160	26.035	473	26.033	585
26.04	692	26.037	446	26.041	274	26.04	67	26.04	272	26.04	656	26.04	47	26.04	1	26.041	2	26.04	2	26.041	157	26.039	468	26.037	582
26.044	661	26.041	425	26.045	270	26.044	67	26.044	260	26.044	642	26.044	47	26.044	1	26.045	2	26.044	2	26.045	152	26.043	456	26.041	565
26.048	652	26.045	418	26.049	261	26.049	66	26.048	253	26.048	624	26.048	49	26.048	1	26.049	2	26.048	3	26.049	148	26.047	450	26.045	558
26.052	632	26.049	403	26.053	254	26.052	65	26.052	257	26.052	604	26.052	49	26.052	0	26.053	1	26.052	3	26.053	144	26.051	447	26.049	541
26.056	622	26.053	397	26.057	256	26.056	64	26.056	253	26.056	584	26.056	47	26.056	1	26.057	2	26.056	2	26.057	145	26.055	431	26.053	525
26.06	609	26.057	389	26.061	246	26.06	63	26.06	245	26.06	581	26.06	46	26.06	1	26.061	2	26.06	2	26.061	142	26.059	417	26.057	512
26.064	601	26.061	382	26.065	242	26.064	64	26.064	241	26.064	573	26.064	45	26.064	1	26.065	1	26.064	2	26.065	139	26.063	403	26.061	492
26.068	589	26.065	365	26.069	239	26.068	63	26.068	232	26.068	570	26.068	44	26.068	2	26.069	2	26.068	2	26.069	135	26.067	386	26.065	482
26.072	583	26.069	365	26.073	235	26.072	62	26.072	229	26.072	555	26.072	42	26.072	2	26.073	2	26.072	2	26.073	132	26.071	377	26.069	473
26.076	566	26.073	356	26.077	233	26.076	60	26.076	227	26.076	540	26.076	42	26.076	2	26.077	2	26.076	1	26.077	132	26.075	368	26.073	462
26.08	552	26.077	352	26.081	231	26.081	58	26.08	217	26.08	531	26.08	39	26.08	2	26.081	2	26.08	2	26.081	132	26.079	350	26.077	450
26.084	535	26.081	346	26.085	222	26.084	59	26.084	213	26.084	519	26.084	39	26.084	1	26.085	2	26.084	2	26.085	132	26.083	345	26.081	444
26.088	528	26.085	347	26.089	216	26.088	58	26.088	208	26.088	505	26.088	39	26.088	1	26.089	3	26.088	2	26.089	134	26.087	341	26.085	431
26.092	519	26.089	341	26.093	211	26.092	59	26.092	211	26.092	487	26.092	39	26.092	1	26.093	4	26.092	1	26.093	136	26.091	340	26.089	428
26.096	504	26.093	342	26.097	212	26.096	56	26.096	212	26.096	468	26.096	41	26.096	1	26.097	3	26.096	2	26.097	139	26.095	337	26.093	409
26.1	498	26.097	338	26.101	209	26.1	55	26.1	214	26.1	467	26.1	43	26.1	1	26.101	3	26.1	1	26.101	136	26.099	329	26.097	396
26.104	493	26.101	336	26.105	206	26.104	56	26.104	210	26.104	459	26.104	44	26.104	1	26.105	4	26.104	1	26.105	137	26.103	323	26.101	387
26.108	482	26.105	326	26.109	201	26.108	57	26.108	213	26.108	452	26.108	45	26.108	2	26.109	4	26.108	1	26.109	139	26.107	321	26.105	384
26.112	480	26.109	321	26.113	193	26.112	56	26.112	210	26.112	443	26.112	43	26.112	2	26.113	3	26.112	1	26.113	138	26.111	315	26.109	374
26.116	469	26.113	308	26.117	195	26.117	57	26.116	203	26.116	436	26.116	41	26.116	2	26.117	2	26.116	2	26.117	134	26.115	315	26.113	365
26.12	456	26.117	305	26.121	192	26.121	56	26.12	201	26.12	435	26.12	39	26.121	2	26.121	1	26.12	3	26.121	131	26.119	314	26.117	352
26.124	450	26.121	301	26.125	183	26.125	57	26.124	196	26.124	428	26.124	37	26.125	1	26.125	1	26.124	3	26.125	131	26.123	310	26.121	350
26.128	441	26.125	297	26.129	181	26.128	58	26.128	192	26.128	420	26.128	34	26.128	2	26.129	1	26.128	3	26.129	130	26.127	306	26.125	348
26.132	437	26.129	293	26.133	177	26.132	57	26.132	191	26.132	411	26.132	32	26.132	1	26.133	0	26.132	3	26.133	123	26.131	302	26.129	341
26.136	431	26.133	290	26.137	179	26.136	57	26.136	184	26.136	410	26.136	30	26.136	1	26.137	0	26.136	2	26.137	118	26.135	295	26.133	339
26.14	424	26.137	283	26.141	185	26.141	56	26.14	182	26.14	404	26.14	31	26.14	1	26.141	1	26.14	2	26.141	116	26.139	295	26.137	337
26.144	421	26.141	283	26.145	180	26.145	55	26.144	183	26.144	402	26.144	33	26.144	1	26.145	1	26.144	3	26.145	116	26.143	284	26.141	336
26.148	418	26.145	280	26.149	180	26.149	53	26.148	177	26.148	395	26.148	34	26.149	1	26.149	1	26.148	2	26.149	114	26.147	277	26.145	332
26.152	408	26.149	276	26.153	180	26.153	50	26.152	174	26.152	390	26.152	35	26.153	1	26.153	2	26.152	2	26.153	113	26.151	268	26.149	329
26.156	401	26.153	266	26.157	174	26.157	48	26.156	169	26.156	387	26.156	35	26.157	1	26.157	2	26.156	2	26.157	113	26.155	266	26.153	326
26.16	391	26.157	256	26.161	174	26.16	49	26.16	163	26.16	382	26.16	35	26.16	1	26.161	3	26.16	3	26.161	113	26.159	260	26.157	321
26.164	381	26.161	255	26.165	171	26.164	49	26.164	161	26.164	373	26.164	36	26.164	1	26.165	3	26.164	4	26.165	114	26.163	255	26.161	311
26.168	382	26.165	257	26.169	164	26.168	49	26.168	158	26.168	369	26.168	34	26.168	1	26.169	3	26.168	3	26.169	115	26.167	246	26.165	304
26.172	379	26.169	253	26.173	163	26.173	49	26.172	157	26.172	360	26.172	32	26.173	2	26.173	2	26.172	2	26.173	115	26.172	240	26.169	298
26.176	380	26.173	247	26.177	161	26.177	48	26.176	151	26.176	352	26.176	34	26.177	2	26.177	2	26.176	2	26.177	114	26.176	236	26.173	293
26.18	371	26.177	241	26.181	158	26.181	49	26.18	150	26.18	346	26.18	33	26.181	2	26.181	2	26.18	2	26.181	112	26.179	232	26.177	285
26.184	362	26.181	240	26.185	157	26.185	50	26.184	151	26.184	338	26.184	31	26.185	2	26.185	2	26.184	2	26.185	110	26.183	225	26.181	280
26.188	356	26.185	241	26.189	155	26.189	49	26.188	153	26.188	333	26.188	30	26.189	2	26.189	1	26.188	2	26.189	113	26.187	218	26.185	279
26.192	354	26.189	239	26.193	155	26.193	48	26.192	153	26.192	320	26.192	28	26.193	2	26.193	1	26.192	1	26.193	111	26.191	218	26.189	274
26.196	342	26.193	229	26.197	150	26.197	48	26.196	150	26.196	313	26.196	29	26.197	2	26.197	1	26.196	1	26.197	111	26.195	217	26.193	271
26.2	334	26.197	225	26.201	147	26.201	45	26.2	145	26.2	312	26.2	31	26.201	2	26.201	1	26.2	1	26.201	111	26.199	216	26.197	266
26.204	327	26.201	219	26.205	142	26.205	45	26.204	147	26.204	309	26.204	31	26.205	1	26.205	1	26.204	2	26.205	113	26.204	211	26.201	266
26.208	329	26.205	219	26.209	138	26.209	44	26.208	146	26.208	305	26.208	31	26.209	1	26.209	1	26.208	2	26.209	113	26.208	209	26.205	259
26.212	330	26.209	215	26.213	138	26.213	45	26.212	144	26.212	296	26.212	33	26.213	1	26.213	1	26.212	2	26.213	114	26.212	204	26.209	249
26.216	328	26.213	216	26.217	134	26.217	45	26.216	138	26.216	292	26.216	34	26.217	1	26.217	1	26.216	2	26.217	111	26.215	207	26.213	241
26.22	326	26.217	209	26.221	127	26.221	47	26.22	134	26.22	291	26.22	36	26.221	1	26.221	2	26.22	2	26.221	111	26.219	200	26.217	237
26.224	327	26.221	206	26.225	128	26.225	44	26.224	138	26.224	284	26.224	36	26.225	1	26.225	2	26.224	2	26.225	110	26.223	199	26.221	236
26.228	325	26.225	199	26.229	124	26.229	46	26.228	138	26.228	279	26.228	36	26.229	1	26.229	2	26.228	2	26.229	108	26.227	196	26.225	232
26.232	318	26.229	198	26.233	129	26.233	48	26.232	133	26.232	275	26.232	34	26.233	1	26.233	3	26.232	1	26.233	92	26.231	201	26.229	227
26.236	309	26.233	184	26.237	130	26.237	49	26.236	132	26.236	269	26.236	33	26.237	1	26.237	2	26.236	1	26.237	76	26.236	198	26.233	229
26.24	297	26.237	159	26.241	128	26.241	47	26.24	129	26.24	270	26.24	31	26.241	1	26.241	2	26.24	2	26.241	61	26.24	199	26.237	232
26.244	287	26.241	128	26.245	128	26.245	44	26.244	128	26.244	274	26.244	30	26.245	1	26.245	2	26.244	1	26.245	48	26.244	193	26.241	237
26.248	286	26.245	106	26.249	127	26.249	41	26.248	126	26.248	269	26.248	30	26.249	1	26.249	3	26.248	1	26.249	47	26.248	192	26.245	234
26.253	280	26.249	103	26.253	128	26.253	42	26.252	123	26.252	270	26.252	31	26.253	1	26.253	3	26.252	1	26.253	51	26.251	188	26.249	233
26.256	281	26.253	105	26.257	131	26.257	43	26.256	123	26.256	264	26.256	28	26.257	1	26.257	3	26.256	2	26.257	61	26.256	187	26.253	231
26.26	281	26.257	111	26.261	131	26.261	43	26.26	125	26.26	261	26.26	28	26.261	2	26.261	3	26.26	2	26.261	82	26.259	182	26.257	227
26.264	288	26.261	126	26.265	130	26.265	41	26.264	125	26.264	260	26.264	28	26.265	2	26.265	3	26.264	2	26.265	101	26.263	184	26.261	223
26.268	298	26.265	150	26.269	133	26.269	42	26.268	124	26.268	255	26.268	29	26.269	2	26.269	3	26.268	2	26.269	121	26.267	185	26.265	218
		26.269	180																					26.269	215

[truncated: 1 more sheets: 24.75_101.06]
