# Supplementary material for: Metabolite exchange between microbiome members produces compounds that influence Drosophila behavior
Source: eLife. 2017 Jan 9;6:e18855. doi: 10.7554/eLife.18855 (PMC5222558; doi:10.7554/eLife.18855)
Supplement: Table 2—source data 5. — DOI: http://dx.doi.org/10.7554/eLife.18855.034 [file elife-18855-table2-data5.xlsx]

## Sheet: Peaks1
SCAPWT	RT	Area	scam			mm1			mm2			mm3			ajm			ajm50p			blank11
	1.283	108.389		1.283	156.491		1.287	149.846		1.283	155.905		1.283	115.059		1.287	224.788		1.287	151.169		1.285	82.086
	1.343	70.362		1.347	135.737		1.355	406.153		1.339	542.272		1.343	143.99		1.419	61.025		1.347	22.129		1.422	27.214
	1.403	12110.8		1.415	3059.31		1.415	3630.39		1.347	579.534		1.387	2890.48		1.567	15.821		1.419	66.616		1.595	19.533
	1.927	23622.5		1.571	68.073		1.511	14.629		1.411	8809.22		1.419	11575.3		2.371	32.013		1.683	18.065		1.956	14.011
	2.035	18518		1.935	23906.6		1.575	25.406		1.503	21.772		1.483	141.036		3.48	122.314		2.283	371.776		5.787	29.998
	2.063	6333.5		2.051	19034.8		1.939	14745.7		1.591	24.102		1.571	64.216		5.809	204.882		2.379	193.693		18.066	6693.4
	2.635	40.396		2.067	3901.41		2.043	22451.1		1.799	1933.34		1.803	201.156		6.305	2175.19		2.82	12.678		24.312	161.481
	2.916	125.34		2.075	3239.86		2.287	103.169		1.911	5248.18		1.927	17578.1		8.042	42.851		3.48	323.704		26.252	392.296
	2.971	21.63		2.119	12630.1		2.327	50.747		1.943	19861.9		1.943	5901.05		8.218	241.764		5.177	52.694		27.355	88.842
	3.212	66.72		2.287	30.976		2.375	53.435		2.083	25510.2		2.059	17126.3		15.67	163.503		5.817	173.544		27.435	14.791
	3.388	16606.5		2.66	43.706		2.668	22.333		2.099	2896.5		2.279	82.243		18.091	5370.64		6.322	1218.09		29.104	14.562
	3.452	3287.73		2.948	21.393		2.736	49.617		2.115	5379.49		2.315	34.713		24.319	452.543		7.37	73.675
	4.284	172.301		2.996	14.316		2.956	20.648		2.219	57.572		2.367	33.261		26.252	1310.49		8.043	62.332
	5.769	550.102		3.228	54.09		2.988	1927.53		2.279	74.506		2.703	86.371		26.844	19.357		8.211	930.725
	8.563	3000.36		3.392	3039.78		3.148	13.608		2.319	116.679		2.975	746.371		27.348	489.994		9.143	181.712
	8.667	226.316		3.468	2924.64		3.252	49.244		2.371	33.345		3.235	61.984		27.412	98.846		15.679	114.716
	15.63	554.515		3.752	13.228		3.396	3155.73		2.603	12.092		3.383	8643.6		27.62	68.67		18.1	4994.89
	18.056	2649.42		3.924	60.742		3.472	820.356		2.664	10.025		3.46	5747.74		27.693	15.83		23.335	142.393
	23.375	24133.5		4.304	1088.98		3.788	289.237		2.704	251.477		3.772	85.76		28.201	37.87		23.491	32.056
	24.307	445.781		5.801	308.382		4.309	3115.44		2.94	23.402		4.296	111.513					24.32	316.037
	24.748	219.582		7.246	265.279		4.601	12009.3		2.98	1483.51		4.572	1387.62					24.428	24.409
	24.844	60.377		7.302	156.072		4.849	38.279		3.136	12.089		4.816	50.195					24.66	57.071
	25.2	91.735		7.43	471.395		5.041	228.957		3.236	188.668		5.012	89.205					24.784	18.236
	25.352	14.934		7.482	278.733		5.201	84.945		3.384	4056.17		5.172	14.843					24.816	32.801
	25.584	11.491		7.502	142.078		5.385	282.886		3.46	2696.16		5.185	10.526					24.844	11.866
	25.66	29.885		7.534	202.925		5.513	1237.5		3.776	312.838		5.365	30.511					24.896	58.104
	25.788	34.664		7.578	309.445		5.709	82.728		3.932	17.14		5.485	382.912					24.936	62.922
	25.852	1689.21		7.598	139.61		5.81	280.189		4.072	19.206		5.681	34.422					24.972	173.701
	25.948	117.036		7.618	147.276		6.318	599.528		4.296	415.771		5.781	311.51					25.028	205.782
	26.312	874.751		7.654	261.553		6.886	2247.98		4.82	39.017		6.305	424.745					25.088	132.798
	26.893	17.222		7.678	346.806		8.223	220.037		5.017	220.591		6.853	816.074					25.128	269.127
	26.941	27.781		7.827	66.79		8.615	17726.9		5.177	54.361		7.001	30.055					25.16	230.614
	27.473	344.2		7.847	41.311		8.683	2139.22		5.489	1010.33		8.014	11.955					25.232	246.325
	27.545	30.41		8.599	2890.61		8.731	26795.5		5.681	76.454		8.186	135.155					25.292	54.89
	28.377	44.574		8.699	2070.99		9.135	147.534		5.789	340.317		8.57	9384.73					25.34	100.163
	29.134	20.953		15.666	338.493		13.361	226.075		6.31	309.996		8.606	21146					25.404	307.083
				18.088	3729.34		13.894	139.998		6.866	1969.12		8.678	2644.17					25.524	105.241
				23.367	12334.2		15.678	279.595		8.203	81.146		9.103	107.5					25.552	107.496
				24.315	648.127		18.1	3226.29		8.579	3154.11		13.337	102.662					25.592	72.22
				24.747	213.436		23.295	124.565		8.663	1986.22		13.869	71.324					25.616	158.156
				24.844	60.028		23.363	8562.12		8.679	5688.73		15.642	297.474					25.697	18.477
				25.184	68.61		23.667	32.185		9.111	103.896		18.06	2590.34					25.749	42.708
				25.332	18.475		23.731	12.174		13.357	60.51		23.283	99.013					26.073	35.389
				25.556	14.708		24.095	15.789		13.866	141.441		23.383	2871.49					26.253	1093.21
				25.628	17.679		24.319	572.279		15.647	314.376		23.487	186.168					26.849	30.261
				25.752	28.631		24.415	28.815		16.295	64.173		23.571	48.289					27.35	359.053
				25.808	4425.96		24.655	46.028		18.068	2690.92		23.955	17.258					27.398	255.857
				25.976	94.509		24.747	49.061		23.295	81.557		24.319	288.22					27.622	13.529
				26.068	14.394		24.775	14.439		23.391	811.467		24.419	54.644					28.066	13.849
				26.252	1571.54		24.832	105.548		23.483	147.33		24.663	27.27					28.202	11.168
				26.845	34.909		24.896	83.559		23.955	33.246		24.839	16.367
				27.345	834.863		24.928	49.755		24.312	244.37		24.92	45.812
				27.413	74.313		24.972	149.948		24.372	11.976		24.952	18.901
				27.621	18.623		25.028	183.152		24.412	38.478		24.992	76.355
				28.198	123.709		25.084	105.815		24.552	13.566		25.048	73.005
				28.898	18.761		25.12	280.768		24.588	12.074		25.072	152.542
				29.518	12.786		25.16	195.328		24.652	20.377		25.14	378.656
							25.228	210.328		24.744	87.037		25.192	115.931
							25.296	46.747		24.8	12.182		25.26	146.334
							25.336	74.237		24.828	21.665		25.332	89.786
							25.372	50.617		24.852	15.083		25.372	47.956
							25.404	186.786		24.9	15.124		25.448	127.8
							25.52	76.791		24.968	36.674		25.572	26.05
							25.556	126.838		25.028	40.359		25.596	40.966
							25.588	50.393		25.052	24.628		25.672	78.256
							25.608	54.069		25.108	429.986		25.844	31.979
							25.632	85.178		25.16	63.434		25.88	392.53
							25.696	14.955		25.224	311.386		25.928	59.872
							25.72	14.904		25.336	22.892		25.98	36.583
							25.752	31.519		25.408	69.162		26.056	20.371
							25.812	4219.97		25.524	11.319		26.072	17.468
							25.98	61.148		25.556	37.184		26.152	24.371
							26.02	22.086		25.632	72.821		26.2	19.623
							26.068	46.874		25.684	16.986		26.348	2586.31
							26.112	14.631		25.704	18.193		26.484	13.236
							26.252	6096.25		25.728	19.555		26.737	8302.42
							26.616	152.469		25.764	20.406		26.981	41.955
							26.844	233.365		25.792	24.519		27.069	28.618
							27.345	5134.74		25.829	932.387		27.517	2694.41
							27.621	23.936		25.937	49.515		27.569	352.48
							27.737	28.097		25.997	49.868		27.813	70.351
							28.197	331.998		26.017	58.864		27.933	16.108
							28.902	19.515		26.089	32.827		28.426	817.544
										26.137	48.769		28.726	10.104
										26.201	12.033
										26.225	22.965
										26.277	603.269
										26.369	16.402
										26.417	34.898
										26.457	12.793
										26.481	26.108
										26.521	11.804
										26.653	139.647
										26.841	12.498
										26.981	56.951
										27.029	64.903
										27.417	322.196
										27.469	95.219
										27.706	14.166
										28.238	13.42
										28.302	89.33
										29.03	20.018
										29.683	10.472

## Sheet: chromats
RT	SCAPWT	scam	mm1	mm2	mm3	ajm	ajm50p	blank11
0.002	557	666	745	599	561	761	657	551
0.006	598	683	691	622	552	768	745	547
0.01	605	705	734	684	513	791	728	489
0.014	622	680	695	581	522	822	779	550
0.018	584	721	752	602	510	789	725	562
0.022	577	732	711	541	516	727	777	534
0.026	571	732	723	654	539	727	744	538
0.03	571	708	682	592	505	776	715	484
0.034	606	788	706	571	531	722	760	562
0.038	507	774	751	601	537	795	747	531
0.042	601	624	713	598	475	773	734	541
0.046	569	689	770	551	522	762	778	542
0.05	559	694	713	591	552	795	783	577
0.054	587	754	720	560	541	786	788	542
0.058	530	706	725	558	543	761	720	512
0.062	613	698	725	597	506	769	702	587
0.066	578	744	665	560	533	765	744	512
0.07	534	707	729	614	509	790	715	550
0.074	545	728	684	587	524	753	769	510
0.078	564	712	714	598	480	757	798	546
0.082	642	656	715	608	503	813	763	539
0.086	509	708	673	579	552	770	774	540
0.09	603	696	738	627	525	741	735	565
0.094	582	712	754	568	535	775	684	563
0.098	594	678	712	564	537	804	736	535
0.102	606	712	718	588	511	750	753	581
0.106	559	685	762	588	531	763	765	549
0.11	549	718	756	606	531	760	691	518
0.114	627	699	744	579	518	775	779	546
0.118	595	687	714	575	503	774	709	546
0.122	584	752	718	619	527	705	791	567
0.126	600	660	743	586	521	776	805	549
0.13	582	718	732	596	485	758	692	549
0.134	599	731	680	589	475	733	731	484
0.138	577	677	667	604	510	807	747	558
0.142	597	680	761	602	510	744	700	535
0.146	606	669	714	564	527	767	799	560
0.15	599	660	732	567	558	735	726	535
0.154	552	712	692	555	512	816	784	557
0.158	581	688	750	583	575	830	727	563
0.162	584	734	693	578	536	730	758	554
0.166	593	725	730	604	558	758	759	542
0.17	587	758	717	559	517	722	755	528
0.174	601	765	777	611	571	763	770	526
0.178	569	764	665	611	514	791	698	585
0.182	605	646	725	548	547	800	797	518
0.186	578	675	714	607	555	768	764	539
0.19	576	695	726	635	507	731	744	567
0.194	579	691	768	552	504	773	803	526
0.198	549	704	696	598	566	828	799	540
0.202	580	766	769	560	515	762	755	550
0.206	593	697	738	599	515	744	807	560
0.21	601	728	697	655	526	735	810	508
0.214	554	720	750	543	525	752	742	555
0.218	626	698	697	584	562	727	729	567
0.222	611	668	713	541	499	770	722	556
0.226	604	719	740	585	519	786	744	550
0.23	594	738	721	579	601	737	730	534
0.234	569	691	677	577	556	764	714	521
0.238	582	720	751	592	538	771	750	532
0.242	574	712	751	636	554	725	776	576
0.246	560	719	695	585	532	805	777	550
0.25	548	680	721	605	513	811	754	553
0.254	573	731	763	546	490	739	741	564
0.258	578	711	720	556	505	750	708	544
0.262	592	695	728	588	502	779	721	523
0.266	560	721	742	634	560	832	789	507
0.27	573	755	818	564	565	745	726	508
0.274	556	707	761	584	544	764	760	548
0.278	555	695	763	617	532	785	791	518
0.282	546	711	735	581	574	785	724	508
0.286	618	689	739	567	560	743	737	567
0.29	550	694	728	613	539	744	728	565
0.294	581	744	745	549	526	766	777	481
0.298	570	668	687	562	512	739	745	547
0.302	537	695	776	591	512	780	774	561
0.306	579	670	741	610	535	787	737	545
0.31	609	613	688	598	541	751	763	527
0.314	570	731	771	586	529	807	771	528
0.318	566	674	709	625	552	786	756	538
0.322	588	695	735	579	561	777	777	561
0.326	588	690	731	561	548	829	793	555
0.33	590	737	727	587	594	781	723	538
0.334	542	729	765	526	505	841	716	560
0.338	577	724	708	600	556	793	765	509
0.342	555	658	702	583	579	778	722	543
0.346	570	719	778	565	506	753	776	571
0.35	573	716	780	567	497	821	706	572
0.354	565	752	734	596	550	783	759	557
0.358	559	655	732	589	536	739	808	538
0.362	599	723	779	584	540	800	776	548
0.366	575	693	722	632	532	764	761	577
0.37	586	733	712	593	551	782	777	606
0.374	568	695	772	545	524	778	753	532
0.378	619	724	769	599	512	821	763	485
0.382	554	689	685	546	551	834	696	562
0.386	576	689	715	606	548	817	745	554
0.39	568	720	733	573	502	779	769	529
0.394	589	778	707	591	548	783	769	545
0.398	582	728	750	574	550	762	735	536
0.402	566	764	720	602	563	770	791	520
0.406	537	705	690	608	593	809	792	533
0.41	584	703	728	573	535	797	742	566
0.414	605	745	738	619	559	759	757	498
0.418	570	694	709	621	553	734	837	566
0.422	567	724	680	553	535	775	749	561
0.426	617	684	727	581	459	787	671	533
0.43	611	714	712	548	509	818	714	553
0.434	647	731	686	521	521	795	743	527
0.438	559	698	771	514	542	729	807	522
0.442	540	692	779	632	571	793	776	547
0.446	575	694	763	563	536	768	779	536
0.45	545	669	749	638	533	795	748	572
0.454	551	726	760	590	558	805	769	576
0.458	531	714	706	605	493	790	776	553
0.462	559	696	754	571	561	819	791	549
0.466	594	740	771	620	500	835	817	556
0.47	551	718	745	562	543	838	746	562
0.474	575	716	763	598	567	767	753	517
0.478	589	705	687	587	570	775	725	567
0.482	561	751	768	570	568	776	792	546
0.486	507	641	683	590	491	794	750	534
0.49	586	763	695	585	533	792	793	522
0.494	578	663	738	596	522	789	793	504
0.498	537	686	797	564	554	768	768	526
0.502	601	713	713	571	541	803	742	573
0.506	534	714	762	569	529	787	792	547
0.51	607	659	726	552	542	762	733	530
0.514	623	693	732	619	557	788	777	564
0.518	577	690	754	586	506	754	824	576
0.522	596	725	799	575	536	801	756	540
0.526	601	724	681	595	565	757	776	526
0.53	549	732	723	580	572	758	788	540
0.534	549	647	755	539	541	771	746	508
0.538	582	712	733	613	549	850	787	591
0.542	535	739	727	584	547	750	724	540
0.546	547	727	754	608	577	718	705	564
0.55	584	723	718	615	548	778	730	568
0.554	562	729	734	573	500	767	814	512
0.558	564	690	721	560	518	778	773	508
0.562	583	685	734	592	548	760	772	556
0.566	493	689	747	620	502	768	726	553
0.57	591	660	759	572	550	723	793	491
0.574	563	716	727	601	551	839	781	595
0.578	585	709	702	595	502	768	747	564
0.582	561	690	728	580	572	806	710	519
0.586	597	697	744	596	536	829	774	539
0.59	584	694	777	594	522	792	757	545
0.594	589	727	776	602	567	807	740	556
0.598	623	725	654	587	548	752	750	556
0.602	580	717	731	568	526	793	761	512
0.606	566	714	686	614	553	826	731	565
0.61	582	679	707	567	534	771	764	503
0.614	578	722	768	562	548	791	723	503
0.618	580	724	782	612	554	740	767	565
0.622	568	704	768	595	531	795	754	562
0.626	567	751	704	591	568	790	757	534
0.63	549	700	759	591	535	771	776	512
0.634	566	707	736	587	567	787	778	468
0.638	579	740	774	562	515	741	721	522
0.642	595	774	692	645	533	824	714	591
0.646	563	713	743	623	543	805	739	509
0.65	583	660	763	589	493	757	789	559
0.654	561	704	705	587	488	763	768	530
0.658	578	673	718	572	597	801	772	548
0.662	579	764	827	577	568	774	746	517
0.666	577	693	737	592	554	792	760	524
0.67	550	721	750	607	516	778	777	569
0.674	583	697	753	589	471	801	778	554
0.678	517	683	771	570	555	784	754	537
0.682	572	742	717	583	544	831	701	508
0.686	549	713	687	591	551	766	788	542
0.69	621	693	737	571	558	788	769	520
0.694	519	714	807	531	590	798	761	531
0.698	598	718	814	597	459	750	733	579
0.702	533	717	737	592	545	792	726	527
0.706	563	743	751	595	571	751	772	531
0.71	567	702	729	605	527	737	750	506
0.714	566	665	751	578	547	789	809	521
0.718	544	694	707	586	563	755	712	572
0.722	525	678	735	613	549	763	818	557
0.726	633	682	731	594	544	789	780	541
0.73	568	696	720	634	558	729	775	536
0.734	613	706	769	647	525	761	738	570
0.738	606	715	733	625	546	724	775	562
0.742	574	708	752	598	568	788	777	550
0.746	540	710	771	608	559	720	746	589
0.75	591	724	726	583	582	752	729	530
0.754	587	788	704	599	547	782	769	591
0.758	540	736	719	579	554	749	732	546
0.762	587	773	711	567	547	706	778	598
0.766	567	696	737	591	549	802	725	545
0.77	550	658	694	538	536	727	722	540
0.774	597	656	719	590	574	761	793	541
0.778	598	666	742	553	556	773	726	544
0.782	579	685	764	586	499	772	717	544
0.786	580	649	746	576	522	762	744	537
0.79	550	685	773	607	520	738	745	559
0.794	563	657	740	583	512	822	753	536
0.798	602	653	713	579	557	831	724	551
0.802	558	705	752	645	561	732	748	535
0.806	578	717	716	607	534	780	728	606
0.81	587	713	720	570	551	761	756	556
0.814	585	705	728	588	543	784	737	522
0.818	563	684	714	605	526	754	787	545
0.822	651	744	660	606	549	770	769	576
0.826	577	742	703	606	520	711	774	569
0.83	617	659	745	626	507	666	726	561
0.834	544	716	722	610	554	733	733	505
0.838	575	704	672	598	577	814	736	486
0.842	584	697	734	560	542	713	766	558
0.846	532	703	733	615	547	737	792	535
0.85	572	735	732	552	553	804	786	551
0.855	573	715	703	615	519	794	722	550
0.859	585	659	752	570	552	751	742	599
0.863	560	703	698	592	530	715	748	580
0.866	526	711	775	605	556	732	728	524
0.87	558	694	751	566	556	788	756	558
0.874	565	681	731	574	550	796	797	557
0.878	567	665	737	649	545	753	726	564
0.882	564	743	723	547	513	772	778	575
0.887	553	700	679	587	542	746	657	545
0.891	575	640	732	590	540	766	701	549
0.895	546	667	723	562	503	772	768	536
0.899	569	670	778	591	529	786	724	609
0.902	592	695	741	580	463	746	741	542
0.906	593	728	731	608	514	775	749	513
0.91	604	724	731	549	552	823	721	556
0.914	577	666	663	591	567	758	695	501
0.918	565	709	741	590	475	731	767	579
0.923	592	719	727	611	531	725	742	492
0.927	570	738	734	562	580	783	710	544
0.931	633	695	735	594	539	751	751	518
0.934	542	736	693	624	566	763	753	542
0.938	567	727	746	569	575	766	759	562
0.942	555	706	733	604	561	790	784	573
0.946	541	733	753	605	502	749	760	529
0.95	533	699	768	583	516	751	747	557
0.955	572	691	721	594	513	758	741	556
0.959	570	682	694	572	538	742	751	527
0.963	555	715	667	558	556	708	725	526
0.967	558	740	685	552	527	734	772	576
0.971	556	670	687	596	536	745	702	545
0.975	539	684	737	611	538	752	725	496
0.978	573	761	722	545	573	795	734	570
0.982	615	759	718	583	484	789	698	537
0.987	568	740	696	599	555	761	720	545
0.991	564	692	672	551	527	783	719	527
0.995	580	717	728	594	559	764	732	561
0.999	571	658	823	615	556	764	770	536
1.003	588	624	773	587	554	748	709	527
1.006	585	679	711	553	520	757	758	567
1.01	584	721	729	550	529	758	701	544
1.015	567	704	679	578	478	647	767	522
1.018	556	693	709	588	530	714	752	533
1.023	496	679	748	583	535	770	717	550
1.027	615	723	725	609	560	792	712	559
1.031	552	767	741	578	509	748	726	565
1.035	585	686	697	569	508	744	757	558
1.039	583	719	711	616	564	795	718	536
1.043	549	713	762	617	510	776	762	522
1.046	591	671	722	582	542	799	743	526
1.051	538	749	682	595	552	728	677	581
1.055	564	708	717	567	506	784	748	519
1.059	519	670	733	584	506	776	764	555
1.063	594	727	746	597	503	781	719	578
1.067	598	683	690	567	522	735	787	529
1.071	531	750	712	574	534	740	697	530
1.075	546	721	702	551	514	698	755	583
1.079	552	672	744	655	523	696	710	572
1.083	547	742	708	630	560	764	766	530
1.087	607	756	696	572	534	757	769	559
1.091	576	701	758	581	549	766	756	543
1.095	593	694	753	628	527	776	810	566
1.099	524	657	685	622	545	735	721	555
1.103	598	758	690	540	506	758	802	533
1.107	548	699	721	642	548	830	721	526
1.111	568	675	811	647	537	771	721	535
1.115	580	742	705	583	547	746	684	586
1.119	542	692	810	551	534	760	720	536
1.123	517	718	745	576	521	786	749	533
1.127	545	724	737	569	538	779	800	516
1.131	567	742	708	584	551	744	702	577
1.135	551	672	749	561	511	797	753	573
1.139	563	706	714	607	548	707	754	556
1.143	553	727	685	555	526	787	727	567
1.147	516	671	722	599	526	754	742	538
1.151	556	711	684	566	557	722	741	512
1.155	568	685	724	603	550	846	693	552
1.159	586	736	756	583	530	736	763	543
1.163	547	732	723	558	505	759	794	538
1.167	544	698	790	593	511	793	680	553
1.171	585	699	744	579	492	782	748	602
1.175	529	690	734	649	575	789	689	545
1.179	630	779	728	624	557	724	709	544
1.183	558	775	719	591	540	756	706	480
1.187	500	747	707	616	538	716	760	558
1.191	612	720	754	635	488	776	764	536
1.195	557	731	790	604	549	770	724	533
1.199	528	700	690	572	541	805	775	521
1.203	633	674	718	600	535	771	749	552
1.207	579	693	715	627	516	793	685	569
1.211	587	709	696	548	557	721	743	497
1.215	544	717	753	580	561	732	763	503
1.219	604	678	712	596	556	745	737	504
1.223	626	715	743	636	537	691	742	527
1.227	598	684	677	572	535	704	756	517
1.231	544	740	737	625	558	748	741	529
1.235	552	681	639	585	522	751	782	541
1.239	568	694	659	596	552	741	713	555
1.243	529	675	725	568	546	742	750	591
1.247	571	694	716	537	511	750	774	572
1.251	565	744	710	567	601	799	770	523
1.255	563	762	732	597	686	723	731	533
1.259	604	741	668	583	876	808	726	542
1.263	741	864	806	789	1147	889	829	547
1.267	1041	1206	1083	1185	1098	1208	930	551
1.271	1565	1782	1405	2002	1256	1669	1324	519
1.275	2162	2512	2071	2727	1910	2133	1844	529
1.279	3054	5830	3023	6242	4979	2990	2487	557
1.283	5572	7299	6131	7514	5362	6701	5935	560
1.287	3445	6723	7284	6780	4101	7808	6864	570
1.291	2603	4801	6646	3885	3428	6202	6391	520
1.295	2390	2978	3619	2745	2861	3426	3624	547
1.299	2461	2753	2678	2568	2590	2718	2804	530
1.303	2432	2528	2763	2601	2415	2602	2539	549
1.307	2259	2501	2615	2358	2202	2281	2572	568
1.311	2148	2371	2425	2196	2055	2112	2452	534
1.315	1963	2159	2177	2031	2099	1987	2124	550
1.319	1765	2025	2029	1935	2356	1878	1885	534
1.323	1795	1974	1884	2260	2706	1927	1963	543
1.327	1931	1957	1995	4154	2807	1713	1737	566
1.331	2320	2377	2964	7520	2648	1712	1542	590
1.335	2796	3174	5082	37358	2946	1757	1347	523
1.339	3274	4523	14120	77798	4368	1792	1414	549
1.343	3302	6457	12389	18183	5759	1750	1528	542
1.347	2715	7236	16648	68768	5477	1818	1715	561
1.351	1780	5805	15656	45762	3932	1815	1613	551
1.355	1252	3489	26174	16920	2504	1804	1305	572
1.359	838	2094	5848	3392	1825	1736	993	540
1.363	781	1529	2736	1773	1665	1632	867	506
1.367	667	1218	1829	1321	1414	1646	698	544
1.371	606	1035	1414	1025	1551	1598	709	510
1.375	550	922	1307	966	1975	1660	639	575
1.379	508	854	1059	848	69666	1545	607	579
1.383	834	781	926	753	181633	1491	663	553
1.387	53976	713	936	2027	453144	1502	564	612
1.391	165648	969	816	63182	37238	1329	663	697
1.395	259237	12584	2867	162810	304056	1221	595	923
1.399	470595	34391	32896	226468	252752	1309	579	1229
1.403	615097	61829	67508	257396	250328	1478	614	1300
1.407	394156	106530	98411	300598	288844	1563	849	1420
1.411	372075	142085	138583	328479	358124	2005	1892	1672
1.415	304683	152682	166808	309491	383617	2724	3243	2284
1.419	212558	125540	163652	250453	507880	3383	4227	5284
1.423	108199	75608	123919	165063	258881	3043	3610	5895
1.427	39841	34437	65320	84397	155462	2145	2643	3026
1.431	16920	16586	31325	32457	73401	1513	1897	2187
1.435	4101	3852	13901	13366	26647	1099	1329	1337
1.439	2831	2302	3460	3463	12401	848	1077	860
1.443	2229	1577	2006	2490	3369	780	880	826
1.447	2005	1266	1504	1868	2495	646	744	852
1.451	1670	1149	1281	1538	2101	690	676	878
1.455	1383	884	1148	1406	1795	648	627	800
1.459	1215	903	1040	1271	1538	612	571	817
1.463	1071	912	925	1048	1483	597	590	756
1.467	1052	789	886	1052	1455	578	563	717
1.471	938	719	808	998	1830	561	529	729
1.475	941	697	848	952	3377	606	605	616
1.479	916	719	807	912	5575	680	630	698
1.483	828	673	829	1001	8976	748	668	666
1.487	801	654	920	944	5654	705	670	723
1.491	797	777	988	1016	4178	859	821	778
1.495	770	656	1008	942	2543	775	885	844
1.499	729	675	928	1196	1747	738	839	905
1.503	706	703	958	1479	1418	669	828	790
1.507	652	655	1023	1475	1176	616	743	679
1.511	659	597	1091	1153	949	609	714	686
1.515	614	607	953	862	819	558	602	670
1.519	627	588	741	672	664	525	571	597
1.523	594	580	695	651	672	517	567	540
1.527	589	534	599	560	622	523	570	656
1.531	588	541	591	708	590	504	576	649
1.535	560	487	600	873	611	488	556	602
1.539	573	566	662	1006	581	552	553	636
1.543	581	521	706	877	652	481	586	602
1.547	523	510	655	698	741	492	502	605
1.551	581	532	685	645	920	508	491	631
1.555	632	610	564	495	951	583	544	617
1.559	691	911	561	473	1200	835	551	573
1.563	769	1883	638	512	2072	1037	553	705
1.567	742	3114	821	626	3077	1267	503	1072
1.571	721	4171	1309	721	3310	1210	502	1750
1.575	660	3870	1712	758	2606	939	572	2119
1.579	595	2824	1693	836	1634	767	578	1778
1.583	551	1821	1483	1059	1102	612	536	1558
1.587	528	1242	1100	1378	1024	590	602	1245
1.591	502	941	910	1638	910	570	610	1040
1.595	507	797	815	1484	760	574	535	864
1.599	501	685	708	1108	636	615	525	797
1.603	481	643	676	751	571	551	531	737
1.607	467	556	659	559	537	508	572	751
1.611	474	553	597	527	531	502	542	683
1.615	443	544	562	467	559	484	506	590
1.619	453	537	565	440	463	473	518	683
1.623	466	538	492	411	461	464	498	666
1.627	453	522	495	479	419	491	466	605
1.631	509	501	554	427	412	515	515	675
1.635	522	537	513	475	406	446	574	605
1.639	522	510	531	438	413	531	569	605
1.643	502	568	552	449	417	473	461	710
1.647	507	561	551	506	404	481	540	637
1.651	461	598	534	550	404	533	584	705
1.655	498	603	634	492	421	490	558	746
1.659	466	560	590	465	472	433	515	706
1.663	540	562	584	460	467	493	561	667
1.667	714	570	573	559	547	461	537	670
1.671	687	648	613	600	711	414	640	609
1.675	649	660	781	688	751	534	995	616
1.679	600	718	881	641	653	531	1337	662
1.683	543	726	922	572	667	560	1500	605
1.687	562	608	863	498	599	530	1235	597
1.691	590	603	664	474	511	527	1051	597
1.695	580	564	605	503	573	519	789	582
1.699	493	614	688	451	538	607	776	594
1.703	452	543	623	444	481	594	699	573
1.707	431	530	632	445	451	507	674	677
1.711	437	542	588	393	472	570	644	583
1.715	405	500	602	455	475	510	607	628
1.719	412	526	518	412	471	540	534	604
1.723	419	508	506	395	445	520	540	607
1.727	430	456	494	438	397	465	527	596
1.731	404	523	521	412	392	478	567	617
1.735	426	500	480	414	411	492	605	606
1.739	430	432	517	421	381	534	531	614
1.743	428	483	537	433	383	520	608	547
1.747	495	441	454	420	372	463	574	638
1.751	460	420	472	429	361	465	564	689
1.755	454	471	491	386	371	477	549	928
1.759	412	468	508	445	376	470	544	1187
1.763	1435	560	473	401	345	490	536	1604
1.767	2967	568	509	483	356	500	501	1639
1.771	3687	480	506	2242	428	484	532	1485
1.775	4616	530	516	3112	789	451	501	1231
1.779	5444	523	496	4466	1468	509	529	937
1.783	6236	3369	532	7378	2099	517	551	675
1.787	11725	4762	549	24866	2510	470	563	583
1.791	13057	5593	527	44395	3323	481	539	576
1.795	14329	10859	540	71656	5099	484	532	533
1.799	15848	12374	3687	83282	9323	498	480	592
1.803	19138	14214	4937	77149	10655	522	542	627
1.807	21505	15856	9636	60512	10127	480	518	562
1.811	26828	19742	11574	43120	5924	466	560	575
1.815	28593	22692	13368	28747	5530	500	578	600
1.819	31303	28124	15097	25253	5655	458	580	551
1.823	33833	29793	20264	24705	6112	472	588	517
1.827	36194	31112	21922	25440	10424	490	642	522
1.831	37804	34337	25682	26775	11875	483	541	607
1.835	39965	37040	27939	28219	13026	489	551	538
1.839	42614	38744	32088	28965	14057	499	622	604
1.843	44176	41452	35283	29458	15727	500	668	544
1.847	46974	44862	35922	31475	19733	499	592	602
1.851	50649	47821	38371	32823	23331	487	637	538
1.855	53180	50691	41901	34866	25394	526	648	565
1.859	55550	53786	44896	35971	27598	529	598	559
1.863	59023	56486	47806	37310	29347	577	620	595
1.867	62352	58435	50608	39638	32437	532	605	574
1.871	64883	60123	53859	41315	35681	597	612	538
1.875	66564	63651	57245	43936	37545	520	580	605
1.879	69878	67102	59351	46474	38371	474	580	615
1.883	73776	70757	60690	49116	41133	508	594	678
1.887	77516	75464	65860	51599	43950	537	659	634
1.891	81192	78015	69718	54218	46514	497	579	629
1.895	85783	81724	72029	57579	51022	509	583	611
1.899	88514	86599	75637	62017	68638	504	550	588
1.903	98053	91493	78903	70333	152831	528	573	585
1.907	126741	96670	81447	123892	307345	507	543	524
1.911	224983	105239	86304	325887	446259	494	553	594
1.915	399781	131814	93040	61949	510377	530	610	605
1.919	524623	234467	99411	64276	553502	524	604	522
1.923	597358	395499	121178	349926	618623	577	565	544
1.927	604749	535002	172358	306264	664205	525	568	590
1.931	568553	595508	176928	307819	398473	527	571	519
1.935	471715	596027	323889	713216	295429	531	569	559
1.939	339176	556121	343124	709943	365755	510	548	563
1.943	211384	455902	314289	827202	422313	509	587	570
1.947	162933	332930	253147	608824	237793	546	572	549
1.951	151745	217596	188200	412271	142547	498	562	522
1.955	153468	170363	158939	224589	109792	464	609	553
1.959	151269	159614	152938	170504	107164	504	627	540
1.963	154270	163596	153297	161470	108690	521	656	596
1.967	159318	165543	152938	163087	108473	577	669	597
1.971	163713	168809	156236	164242	112269	545	689	536
1.975	169661	172840	160591	167523	117303	525	671	549
1.979	175564	176329	163148	174326	119376	531	580	602
1.983	179095	180037	166513	176789	123214	522	581	576
1.987	182489	183848	169695	179616	126729	552	615	573
1.991	185308	189584	174377	183228	132813	551	578	607
1.995	189778	195116	178515	187645	135362	525	553	591
1.999	191094	196914	181409	188361	139213	499	610	579
2.003	194072	198786	184381	190608	142040	504	589	552
2.007	206385	196975	185935	195091	144253	517	603	575
2.011	213240	204343	189688	202972	149654	476	629	569
2.015	216222	210138	198787	205691	156717	497	539	566
2.019	223064	217552	205077	210840	160204	509	555	560
2.023	233837	217888	205798	215071	165029	510	579	600
2.027	247262	226431	212264	218327	169417	507	552	528
2.031	255019	236152	225121	222660	175669	557	583	612
2.035	257006	240456	225056	225102	180597	537	525	545
2.039	254070	245810	256874	230646	183189	528	570	566
2.043	248517	247880	268674	232935	186522	510	616	571
2.047	245595	248309	262446	232848	188936	512	554	583
2.051	250607	251179	255698	238130	197454	527	613	613
2.055	253428	247574	253233	243441	201718	615	556	622
2.059	253274	251686	253453	247297	203908	630	582	590
2.063	257577	257635	254317	252472	203478	615	658	595
2.067	251775	258766	227524	253343	125000	611	613	585
2.071	136252	178914	116028	258246	18132	642	592	617
2.075	15971	309409	18092	258683	11207	584	682	572
2.079	10912	272968	12618	262986	5754	574	599	547
2.083	6518	276779	10104	270545	4730	650	604	532
2.087	5533	275169	6451	46707	4187	540	647	550
2.091	4770	281654	5523	48908	3663	557	542	558
2.095	4355	286161	5066	276323	3344	557	616	533
2.099	4018	289608	4595	281789	3040	529	584	550
2.103	3666	293544	4256	197535	2930	543	588	569
2.107	3354	294796	3846	287933	2843	548	586	578
2.111	3143	296330	3607	298896	2635	521	541	575
2.115	2987	298363	3418	299085	2457	484	606	506
2.119	2796	301680	3280	212615	2301	508	563	522
2.123	2721	231971	3016	75995	2139	542	614	609
2.127	2552	91400	3061	16051	2162	528	556	550
2.131	2377	17256	2819	11423	2142	482	598	531
2.135	2331	12476	2757	6384	2053	524	582	542
2.139	2283	10197	2574	5698	1970	523	623	545
2.143	2219	6100	2520	4970	1809	523	546	562
2.147	2173	5507	2457	4489	1897	492	592	550
2.151	2193	5017	2400	4096	1733	530	583	616
2.155	2087	4487	2235	3867	1731	542	617	788
2.159	2017	4464	2171	3579	1642	674	593	1026
2.163	1921	4082	2162	3402	1609	814	620	1048
2.167	1867	3698	2067	3106	1595	884	553	1083
2.171	1777	3516	1942	3025	1583	786	562	1054
2.175	1754	3138	2053	2811	1567	773	589	941
2.179	1751	3155	1982	2828	1548	732	538	862
2.183	1753	2974	1895	2676	1460	705	602	831
2.187	1637	2827	1964	2506	1437	658	559	752
2.191	1572	2885	1824	2473	1410	668	555	763
2.195	1517	2801	1839	2291	1389	623	638	676
2.199	1566	2521	1663	2364	1385	591	585	711
2.203	1676	2519	1756	2184	1411	577	568	656
2.207	1518	2476	1739	2241	1302	581	550	684
2.211	1475	2315	1805	2172	1351	584	614	652
2.215	1432	2378	1707	2315	1358	555	571	608
2.219	1364	2309	1695	2318	1347	567	574	629
2.223	1474	2165	1636	2277	1298	548	543	680
2.227	1427	2145	1705	2091	1272	550	544	643
2.231	1385	2084	1590	2129	1245	589	580	622
2.235	1385	2121	1588	1999	1276	554	562	634
2.239	1313	2004	1546	1996	1143	553	544	597
2.243	1301	2031	1522	1916	1205	586	549	594
2.247	1357	2004	1496	1912	1278	561	578	595
2.251	1371	1938	1554	1856	1378	557	548	582
2.255	1245	1912	1610	1783	1389	523	589	620
2.259	1267	1798	1682	1747	1707	526	590	593
2.263	1272	1801	1519	1894	2037	584	608	569
2.267	1225	1886	1668	2359	2298	528	603	559
2.271	1175	1843	2006	2907	2879	540	714	571
2.275	1221	1877	2832	3694	3512	518	2898	600
2.279	1214	2013	4127	4223	3618	594	8471	546
2.283	1204	2192	5707	3907	3309	580	17546	609
2.287	1169	2194	6380	3166	2505	626	17463	545
2.291	1155	1999	6004	2542	2013	699	16205	581
2.295	1149	1915	4771	2070	1759	760	12177	561
2.299	1125	1807	3408	2020	1521	713	8194	579
2.303	1081	1604	2464	2436	1619	773	5103	594
2.307	1112	1557	1996	3238	1888	695	3360	595
2.311	1030	1546	2139	4352	2107	641	2356	547
2.315	1059	1532	2463	5059	2236	591	1727	634
2.319	1070	1525	3011	5286	1988	548	1390	551
2.323	1072	1519	3379	4912	1764	594	1277	508
2.327	1128	1472	3401	4199	1483	604	1083	526
2.331	1025	1506	3158	3440	1258	566	997	541
2.335	1025	1434	2597	2762	1183	569	953	555
2.339	1060	1470	2204	2202	1164	651	907	558
2.343	1060	1480	1892	1700	1190	598	914	572
2.347	1020	1433	1714	1523	1280	567	849	563
2.351	1109	1418	1455	1534	1378	572	818	591
2.355	1167	1371	1559	1651	1588	578	862	592
2.359	1214	1458	1847	1821	1727	623	1013	551
2.363	1192	1439	2110	2222	1789	707	2234	527
2.367	1034	1438	2657	2370	1990	1407	4046	507
2.371	1080	1468	3032	2404	1875	1555	5715	536
2.375	1053	1364	3403	2209	1642	1487	7245	569
2.379	1033	1476	3272	1939	1371	1464	7596	580
2.383	1091	1382	2960	1689	1209	1276	6614	520
2.387	976	1348	2499	1482	1134	1159	5170	548
2.391	960	1390	2083	1321	993	1126	3860	557
2.395	1046	1305	1614	1283	984	1060	2876	550
2.399	1072	1298	1411	1144	922	965	2110	537
2.403	961	1283	1379	1206	919	923	1719	503
2.407	967	1194	1280	1279	904	893	1454	571
2.411	941	1215	1277	1212	898	832	1357	615
2.415	987	1264	1243	1191	871	826	1170	581
2.419	956	1289	1217	1147	927	805	1122	561
2.423	934	1215	1198	1174	899	714	1139	580
2.427	943	1150	1202	1169	905	741	1117	544
2.431	914	1233	1257	1143	900	758	992	563
2.435	981	1211	1152	1170	910	689	984	583
2.439	883	1250	1175	1157	878	697	986	581
2.443	908	1264	1230	1149	918	720	911	527
2.447	932	1192	1171	1203	875	646	851	565
2.451	962	1220	1219	1132	840	639	903	549
2.455	949	1246	1241	1132	862	704	857	568
2.459	865	1279	1172	1117	863	658	821	574
2.463	966	1224	1153	1115	860	711	818	577
2.467	850	1224	1133	1069	821	672	864	580
2.471	899	1146	1131	1093	863	686	788	573
2.475	863	1218	1216	1049	767	645	775	568
2.479	892	1124	1183	1016	810	627	811	539
2.483	959	1099	1188	967	840	638	748	582
2.487	866	1167	1076	996	776	608	820	534
2.491	881	1182	1075	1056	840	637	741	537
2.495	928	1129	1128	1022	828	626	791	558
2.499	903	1162	1141	1018	773	606	741	541
2.503	870	1163	1039	1084	749	660	711	570
2.507	835	1120	1149	1020	815	686	765	616
2.511	879	1053	1096	1008	857	643	764	546
2.515	851	1129	1051	998	727	603	757	537
2.519	797	1085	1042	949	801	632	729	521
2.523	937	1198	1002	970	797	640	750	588
2.527	774	1145	1089	1016	804	625	744	576
2.531	877	1091	1008	1015	783	598	729	599
2.535	855	1097	1055	995	760	592	653	501
2.539	804	1024	963	956	723	594	734	515
2.543	831	1058	1045	1009	738	627	653	525
2.547	808	1086	1066	947	787	590	656	554
2.551	791	1084	1027	940	846	568	682	530
2.555	825	1048	1034	879	738	602	677	587
2.559	793	1040	983	989	737	572	727	552
2.563	867	1062	1043	923	754	607	697	524
2.567	818	1062	963	983	725	611	708	537
2.571	847	994	986	932	745	648	696	580
2.575	803	1092	1007	993	782	602	635	563
2.579	853	1020	989	971	792	593	687	589
2.583	803	981	981	1046	823	599	689	568
2.587	811	1035	966	1099	735	577	618	532
2.591	879	1000	1045	1189	751	605	657	575
2.595	877	996	998	1293	831	605	697	577
2.599	896	1051	1039	1281	801	557	684	565
2.603	941	1055	982	1335	781	595	611	620
2.607	920	1026	990	1111	838	561	691	628
2.611	858	1038	1038	1111	836	588	701	586
2.615	839	1162	1083	1058	743	593	659	614
2.619	864	1065	1064	989	728	628	699	572
2.623	1078	1091	1049	991	751	570	664	492
2.627	1587	1028	1087	976	729	631	606	597
2.631	1799	1072	1067	954	773	614	720	584
2.635	1891	1116	1058	932	797	578	675	519
2.639	1803	981	993	906	745	694	665	524
2.643	1754	1049	1043	937	768	573	640	541
2.647	1623	1346	981	982	729	623	678	568
2.651	1510	1850	992	1193	763	657	636	540
2.655	1511	1955	981	1332	814	607	633	504
2.659	1487	1989	1223	1242	722	685	652	614
2.663	1404	1814	1584	1353	918	691	659	602
2.667	1428	1827	1633	1333	1139	599	655	586
2.671	1312	1777	1584	1269	1266	620	691	514
2.675	1270	1758	1595	1261	1360	657	673	555
2.679	1189	1604	1579	1257	1344	585	668	552
2.683	1284	1641	1574	1337	1470	543	673	604
2.687	1228	1579	1504	1710	1634	708	657	557
2.691	1192	1483	1437	2721	1821	599	690	598
2.695	1082	1422	1475	4537	2174	635	609	557
2.699	1097	1339	1317	9560	2456	559	683	576
2.703	1086	1358	1381	11460	2542	644	672	551
2.707	1076	1365	1343	11072	2542	621	702	501
2.711	1028	1298	1389	9694	2357	581	704	534
2.715	1051	1247	1526	5352	2015	640	662	544
2.719	1090	1299	1636	4206	1915	557	735	579
2.723	1088	1308	2009	3307	1652	602	764	604
2.727	1026	1217	2371	2644	1504	640	813	543
2.731	1013	1231	2682	2259	1287	626	834	576
2.735	951	1229	2811	1918	1228	603	829	578
2.739	972	1267	2446	1606	1136	602	876	553
2.743	859	1126	2252	1514	1078	616	903	540
2.747	970	1168	1950	1352	945	573	876	574
2.751	880	1204	1659	1318	994	622	992	575
2.755	949	1235	1467	1190	975	578	913	506
2.759	961	1054	1331	1198	943	634	905	534
2.763	898	1105	1245	1100	926	645	851	547
2.767	919	1225	1233	1188	936	650	941	537
2.771	839	1097	1237	1106	947	680	919	544
2.775	840	1180	1122	1099	885	677	998	558
2.779	912	1092	1222	1021	922	697	1001	529
2.783	853	1144	1201	1065	871	651	976	558
2.787	897	1087	1182	1034	906	669	958	530
2.791	861	1039	1205	1072	870	659	885	565
2.795	903	1111	1196	1030	855	750	868	510
2.799	916	1100	1228	1092	814	685	951	548
2.803	816	1060	1235	1014	849	736	928	549
2.807	780	1074	1153	973	771	750	1010	550
2.811	819	1044	1240	980	818	785	1140	559
2.815	839	1108	1141	945	789	833	1236	537
2.819	892	1039	1186	1008	883	810	1277	537
2.823	829	1026	1075	978	777	870	1271	585
2.827	768	1083	1120	917	788	921	1155	544
2.831	778	1121	1020	922	776	950	1147	554
2.835	808	985	1009	883	781	893	1116	579
2.839	817	1072	941	940	781	912	1058	551
2.843	857	1059	995	888	764	886	1020	522
2.847	833	1012	1045	927	819	871	1106	554
2.851	760	935	942	894	790	907	974	513
2.855	834	921	983	866	770	861	903	476
2.859	871	995	954	949	793	851	924	570
2.864	882	1008	994	860	763	857	888	574
2.867	818	1062	984	941	840	849	888	568
2.871	823	1020	960	863	780	819	933	528
2.875	830	1004	921	907	805	776	853	569
2.879	873	939	956	931	724	777	813	571
2.883	834	1016	988	918	781	739	834	521
2.888	810	934	917	867	820	788	841	532
2.892	933	969	945	889	1009	740	803	606
2.896	1175	951	981	918	1249	766	789	578
2.899	1594	960	885	905	1402	785	853	556
2.903	2479	924	968	869	1467	777	848	560
2.907	3450	934	986	910	1526	765	795	583
2.911	4440	958	977	904	1523	821	878	566
2.916	4538	947	968	900	1566	763	801	551
2.92	4373	908	955	997	1585	776	756	648
2.924	3775	921	958	1126	1682	728	841	682
2.928	3393	945	969	1289	1881	766	777	685
2.932	2842	967	987	1638	2080	764	837	740
2.935	2482	1099	1012	2027	2397	772	833	762
2.94	2155	1246	1286	2359	2888	744	759	774
2.943	1868	1549	1568	2203	3579	759	792	782
2.947	1701	1684	1975	2157	4743	743	805	772
2.951	1600	1661	2256	2111	5970	802	834	783
2.956	1550	1675	2288	2412	7035	800	801	803
2.96	1373	1427	2125	4249	8531	708	737	728
2.964	1406	1459	2067	13059	14180	752	774	736
2.968	1424	1384	2988	32138	19586	764	762	762
2.971	1559	1282	6500	49532	22991	730	854	674
2.976	1517	1228	23576	60681	25749	743	872	684
2.979	1510	1341	46746	62948	22947	704	818	676
2.983	1399	1326	66321	55079	19278	812	758	727
2.987	1279	1275	78746	40176	12669	756	776	696
2.992	1217	1360	77552	27415	6729	843	817	776
2.996	1082	1389	65523	16778	4814	783	791	728
3	1023	1372	50152	6716	3235	826	850	664
3.004	957	1297	33166	4409	2386	763	768	653
3.008	985	1181	19022	2932	1870	800	780	674
3.011	916	1130	8301	2209	1613	749	752	655
3.015	860	1130	5270	1780	1464	739	727	709
3.019	931	1070	3746	1576	1322	721	726	701
3.023	856	1015	2695	1375	1221	740	771	620
3.028	899	965	2257	1263	1093	677	752	679
3.032	837	962	1816	1210	1034	693	779	717
3.036	856	1002	1687	1107	1065	715	690	682
3.04	841	987	1470	1100	960	727	757	611
3.044	807	921	1452	1067	1096	718	782	611
3.047	864	899	1384	1035	976	665	683	673
3.052	873	971	1243	1058	918	696	799	643
3.056	743	911	1238	1093	923	695	728	600
3.06	803	886	1131	1052	1024	688	768	629
3.064	780	943	1105	1043	905	706	807	692
3.068	822	915	1061	1143	886	753	700	674
3.072	782	848	1043	1076	865	722	745	648
3.076	784	955	1082	1092	835	701	742	652
3.08	802	873	1104	995	811	701	754	640
3.084	734	924	1008	968	868	764	734	614
3.088	762	855	958	906	843	716	730	669
3.092	776	881	989	893	755	715	707	634
3.096	762	882	963	849	777	690	768	662
3.1	693	970	989	901	735	706	768	603
3.104	781	873	944	921	766	672	778	595
3.108	722	860	930	905	818	761	750	655
3.112	802	941	944	925	802	704	762	632
3.116	695	884	931	908	809	700	748	556
3.12	744	859	923	984	906	680	778	676
3.124	773	850	979	1027	799	752	757	601
3.128	744	824	954	1211	955	688	731	614
3.132	705	930	1110	1234	946	635	659	661
3.136	811	866	1192	1259	893	615	741	582
3.14	752	884	1342	1210	888	623	756	593
3.144	791	844	1376	1133	764	690	669	591
3.148	749	894	1446	994	740	689	659	616
3.152	757	836	1280	962	770	743	734	586
3.156	773	890	1267	922	710	658	733	590
3.16	701	890	1125	922	807	660	661	601
3.164	709	948	1125	825	693	706	791	583
3.168	764	927	975	869	716	701	677	589
3.172	699	886	943	811	718	620	714	679
3.176	796	866	879	898	753	684	728	600
3.18	703	874	886	895	715	704	756	582
3.184	678	783	968	892	706	619	767	631
3.188	823	888	839	860	748	679	726	550
3.192	886	889	884	823	717	690	670	635
3.196	1111	876	929	844	707	686	707	602
3.2	1647	948	939	854	713	724	711	611
3.204	2375	940	940	967	709	705	775	582
3.208	2818	961	879	1254	760	710	710	594
3.212	3058	1113	856	1648	932	732	701	627
3.216	2944	1357	894	2146	1179	667	729	568
3.22	2508	1876	874	3002	1458	695	733	583
3.224	2113	2352	870	3674	1881	652	683	565
3.228	1786	2546	892	5046	2339	694	736	613
3.232	1436	2459	856	6203	2612	611	719	616
3.236	1214	2375	1059	7063	2928	665	685	603
3.24	985	1981	1492	7015	2743	647	698	579
3.244	885	1717	1902	6348	2473	677	688	595
3.248	892	1459	2544	5063	2086	683	700	576
3.252	819	1228	2653	3793	1679	722	660	579
3.256	823	1119	2612	2785	1272	649	693	565
3.26	836	918	2438	1984	1074	721	685	603
3.264	769	905	1945	1558	989	666	719	600
3.268	772	961	1632	1265	771	652	700	616
3.272	736	900	1399	1103	751	669	678	597
3.276	736	895	1128	963	697	676	638	584
3.28	748	871	1063	1021	784	666	747	577
3.284	677	895	954	862	746	624	690	621
3.288	763	879	916	834	764	690	682	585
3.292	866	862	908	836	723	664	677	623
3.296	845	819	963	861	728	691	639	609
3.3	794	814	805	838	725	701	678	619
3.304	760	838	824	822	682	677	766	611
3.308	833	856	850	833	669	658	721	598
3.312	803	843	839	867	738	668	650	614
3.316	776	911	816	872	733	686	706	578
3.32	807	945	886	870	731	675	639	620
3.324	726	912	839	854	740	658	669	582
3.328	765	927	945	827	764	688	709	649
3.332	772	920	896	841	685	617	691	564
3.336	787	915	883	773	753	691	658	583
3.34	877	901	794	804	788	690	687	588
3.344	3568	864	846	810	2287	686	683	572
3.348	19989	813	904	820	7926	686	590	617
3.352	45904	806	884	799	25795	707	701	548
3.356	99582	864	874	1039	45370	720	724	575
3.36	157791	883	805	4091	68903	760	723	521
3.364	225543	947	863	19566	114924	767	665	569
3.368	285791	2561	937	41633	154935	806	750	574
3.372	336814	12169	3436	79732	191456	744	649	548
3.376	373631	31683	17570	117831	228568	874	691	572
3.38	406830	53745	37463	143316	257616	839	673	566
3.384	451330	85881	66524	152114	271509	807	636	575
3.388	464345	106351	95189	139907	262077	780	720	546
3.392	453471	113730	113966	114932	158976	781	709	569
3.396	373189	105741	117334	81500	157506	836	709	563
3.4	245501	86488	105062	48606	100396	830	704	579
3.404	122622	56973	81386	31983	51172	780	743	544
3.408	47676	40871	54033	21145	30495	783	693	542
3.412	25556	27557	37440	13065	20389	777	764	550
3.416	14408	19317	25036	7268	12884	774	704	526
3.42	8032	11996	16861	5524	8333	773	738	563
3.424	6811	7344	11027	4475	9075	808	695	551
3.428	6564	5477	6682	3869	11585	821	690	569
3.432	8470	4421	5080	3671	26861	874	700	569
3.436	20888	3806	4191	4774	45040	918	773	555
3.44	46238	3654	3617	8536	69570	882	750	563
3.444	77970	4732	3144	25445	98124	967	849	575
3.448	104571	9091	3093	48495	127572	865	881	592
3.452	119851	26391	3777	72515	156333	882	919	522
3.456	119019	48005	5909	88204	178341	899	916	575
3.46	103820	72757	9788	94956	182213	894	1074	590
3.464	79579	92923	19363	90502	167197	1105	2560	549
3.468	51810	101874	25119	76525	131413	1697	5286	588
3.472	31718	98654	27642	55869	91062	2748	7704	558
3.476	18638	84214	27576	38763	56905	3686	8827	571
3.48	8781	64492	24149	24913	35671	4061	8896	596
3.484	6519	44628	18705	14141	19682	4048	8346	588
3.488	5048	29103	12999	8430	9459	3860	7302	607
3.492	3929	17967	8520	6183	6793	3419	6284	510
3.496	3343	9525	6648	4797	5351	3091	5317	530
3.5	2899	7028	5067	3967	4550	2842	4451	572
3.504	2767	5545	3952	3370	3664	2371	4044	605
3.508	2401	4426	3279	3102	3234	2193	3507	591
3.512	2292	3769	2729	2662	2953	1887	3017	589
3.516	2093	3244	2503	2398	2745	1823	2648	569
3.52	2024	2820	2130	2312	2445	1684	2416	581
3.524	1851	2486	1999	2118	2245	1485	2208	604
3.528	1863	2264	1969	1991	2053	1337	1946	556
3.532	1684	2115	1761	1809	2024	1286	1860	578
3.536	1597	1889	1670	1732	1912	1175	1797	566
3.54	1591	1820	1556	1590	1812	1212	1529	577
3.544	1596	1809	1573	1528	1612	1139	1563	616
3.548	1539	1677	1445	1439	1615	1051	1389	567
3.552	1440	1591	1428	1328	1498	1036	1342	547
3.556	1461	1564	1388	1348	1471	991	1260	615
3.56	1435	1507	1349	1241	1354	940	1218	570
3.564	1458	1392	1284	1270	1356	834	1189	532
3.568	1388	1338	1214	1212	1328	918	1189	554
3.572	1244	1414	1150	1157	1275	909	1112	568
3.576	1315	1322	1149	1167	1236	891	1107	557
3.58	1305	1279	1096	1144	1244	889	969	613
3.584	1264	1316	1096	1187	1154	821	977	560
3.588	1203	1327	1090	1116	1111	869	1019	587
3.592	1224	1188	1053	1056	1139	864	982	575
3.596	1188	1190	1082	1064	1129	802	1000	572
3.6	1189	1150	1091	1084	1117	798	972	587
3.604	1143	1180	999	1039	1029	822	952	515
3.608	1106	1152	1063	1016	1042	745	950	590
3.612	1045	1166	1051	1048	1019	747	871	547
3.616	1152	1144	1030	1040	1012	741	904	599
3.62	1084	1139	974	1055	1030	815	902	588
3.624	1069	1026	1014	1004	1038	790	899	620
3.628	1092	1058	1057	1087	981	746	928	629
3.632	972	1027	964	1040	1034	757	895	572
3.636	1050	1024	963	994	948	760	932	574
3.64	1108	1029	923	918	991	803	871	529
3.644	1039	1047	965	1047	928	775	844	543
3.648	1007	1052	947	913	1062	744	845	591
3.652	957	1055	985	930	971	712	840	529
3.656	981	1007	930	1027	923	741	867	560
3.66	934	1020	826	959	861	740	864	594
3.664	954	987	940	1012	910	738	856	533
3.668	936	981	879	901	885	722	823	546
3.672	956	1036	853	889	945	713	788	568
3.676	947	977	898	883	845	720	806	548
3.68	988	940	913	895	951	710	822	577
3.684	968	965	952	905	889	754	823	552
3.688	906	941	885	882	847	701	724	579
3.692	946	957	977	930	841	790	816	574
3.696	1079	997	840	919	836	717	765	570
3.7	1100	973	834	864	884	697	732	593
3.704	1168	908	951	885	854	678	760	586
3.708	1190	924	873	862	845	744	776	579
3.712	1274	962	888	884	860	692	784	548
3.716	1284	1001	888	932	876	690	721	546
3.72	1281	1086	877	897	818	695	708	557
3.724	1307	1075	884	916	905	693	794	575
3.728	1240	1203	852	965	830	690	733	604
3.732	1212	1296	856	869	860	719	757	529
3.736	1128	1276	853	930	867	664	794	554
3.74	1126	1321	888	965	922	673	763	616
3.744	1050	1320	850	954	1046	707	742	561
3.748	1059	1412	904	1207	1216	717	760	580
3.752	991	1457	878	1904	1614	665	702	605
3.756	1000	1382	920	3164	1983	674	703	568
3.76	990	1200	982	5177	2514	687	770	533
3.764	1042	1183	1285	8984	2954	722	743	531
3.768	1059	1072	2004	11091	3407	699	693	599
3.772	1019	1068	3198	11596	3415	634	756	564
3.776	959	1174	5138	11824	3291	676	771	545
3.78	954	1215	8382	10455	2909	636	704	558
3.784	985	1223	10130	8073	2422	683	704	591
3.788	972	1140	11320	5324	2006	676	744	567
3.792	894	1213	11034	3966	1614	682	711	523
3.796	889	1295	9417	2989	1388	658	700	549
3.8	807	1194	7401	2364	1171	651	724	602
3.804	844	1148	4669	1663	1023	671	730	490
3.808	821	1073	3514	1442	913	745	718	555
3.812	820	1052	2602	1240	858	717	696	572
3.816	857	1054	2016	1097	842	667	693	550
3.82	881	1092	1589	1002	762	690	725	526
3.824	860	1008	1390	1045	749	683	702	543
3.828	881	1034	1113	979	776	630	699	575
3.832	824	1032	1016	950	776	698	706	544
3.836	869	1088	1014	946	764	692	683	580
3.84	846	1188	969	904	749	700	765	521
3.844	883	1287	957	881	783	674	714	534
3.848	906	1422	906	856	725	669	679	566
3.852	856	1416	890	840	723	696	723	540
3.856	859	1459	884	841	713	691	675	530
3.86	918	1530	885	873	734	685	718	570
3.864	855	1512	905	860	777	705	660	542
3.868	946	1421	875	879	745	683	690	589
3.872	947	1575	831	855	744	672	710	562
3.876	891	1712	903	890	738	644	653	516
3.88	898	1941	824	825	715	646	652	550
3.884	881	1898	887	847	694	679	660	564
3.888	885	1994	896	865	679	702	723	576
3.892	840	2119	873	814	698	687	674	550
3.896	888	2204	836	857	737	715	667	573
3.9	803	2268	883	863	718	690	669	615
3.904	933	2259	871	872	687	609	691	577
3.908	824	2393	893	815	703	704	726	599
3.912	889	2530	962	1043	727	669	709	581
3.916	837	2517	951	950	724	659	694	566
3.92	876	2485	933	1033	708	685	659	558
3.924	856	2585	1016	1130	772	696	656	558
3.928	816	2433	964	1150	677	683	694	519
3.932	827	1916	893	1250	674	657	669	533
3.936	849	1705	890	1180	735	686	730	574
3.94	892	1542	949	1139	744	666	767	538
3.944	929	1466	975	1071	740	655	676	507
3.948	935	1413	973	1109	707	709	691	600
3.952	913	1319	974	999	746	626	655	546
3.956	892	1415	979	927	816	658	687	561
3.96	886	1287	935	885	820	741	671	568
3.964	846	1338	938	855	775	646	634	501
3.968	829	1285	904	855	730	682	692	601
3.972	770	1172	895	847	735	673	718	564
3.976	803	1275	870	741	670	733	650	570
3.98	816	1217	867	732	699	743	643	599
3.984	854	1174	852	823	691	658	698	519
3.988	737	1230	801	733	691	687	711	549
3.992	823	1170	812	744	694	742	707	591
3.996	804	1145	809	751	661	744	639	581
4	753	1074	752	768	702	777	668	544
4.004	837	1165	801	736	692	707	665	625
4.008	772	1109	757	806	618	728	695	537
4.012	797	1176	777	754	684	739	667	553
4.016	780	1096	728	822	686	761	678	538
4.02	816	1144	797	771	703	752	683	563
4.024	790	1130	747	730	670	697	657	518
4.028	816	1093	765	786	640	785	716	566
4.032	800	1094	799	728	687	688	698	562
4.036	829	1161	749	807	695	753	681	537
4.04	781	1086	823	827	685	760	719	540
4.044	804	1096	801	849	672	757	694	570
4.048	756	1063	825	911	733	728	730	561
4.052	796	1111	842	975	744	702	704	577
4.056	824	1138	835	1052	776	754	663	560
4.06	818	1136	888	1188	840	722	720	556
4.064	786	1074	960	1225	831	748	708	597
4.068	827	1097	920	1232	819	821	733	546
4.072	821	1047	993	1308	888	834	682	579
4.076	775	1100	1092	1283	767	780	685	578
4.08	782	1099	1082	1105	799	774	734	550
4.084	787	1102	1028	1107	709	840	721	609
4.088	801	1032	1070	1015	768	852	729	523
4.092	795	1089	1016	900	692	848	747	521
4.096	748	1066	1055	877	705	792	776	575
4.1	754	1053	1023	798	665	833	742	522
4.104	777	1074	946	773	685	778	745	502
4.108	753	1001	901	764	660	783	686	540
4.112	769	1068	862	748	598	788	630	557
4.116	754	1004	839	791	634	807	663	591
4.12	719	989	831	726	692	752	705	577
4.124	717	1004	793	737	651	708	721	528
4.128	691	974	762	735	630	763	724	554
4.132	728	1005	760	754	647	759	693	588
4.136	778	954	838	726	637	702	650	549
4.14	762	951	726	742	609	747	674	583
4.144	834	941	815	794	684	702	668	556
4.148	749	916	766	817	644	765	645	561
4.152	776	1010	709	838	772	712	708	579
4.156	759	926	784	784	754	762	687	590
4.16	760	949	784	799	780	735	713	565
4.164	761	955	771	768	767	702	668	499
4.168	701	947	741	728	744	741	626	553
4.172	685	947	791	772	777	695	687	606
4.176	762	919	778	794	738	734	731	534
4.18	719	912	715	795	751	730	648	536
4.184	726	905	722	721	761	722	729	575
4.188	763	1003	805	787	734	715	632	556
4.192	698	928	861	784	724	737	701	575
4.196	708	882	830	762	670	736	764	538
4.2	738	1006	842	773	709	721	727	599
4.204	723	988	855	719	684	781	704	546
4.208	675	919	795	741	676	726	694	560
4.212	708	965	802	698	673	731	702	567
4.216	728	940	830	752	668	748	747	543
4.22	698	921	755	711	682	727	694	568
4.224	692	940	745	739	691	753	706	549
4.228	680	966	826	690	642	672	741	497
4.232	725	903	809	695	618	749	705	548
4.236	766	809	779	662	671	691	683	543
4.24	760	952	810	711	666	739	707	582
4.244	704	887	799	762	687	749	674	591
4.248	709	889	825	717	661	771	686	576
4.252	722	826	778	666	646	733	735	519
4.256	803	855	741	752	686	724	695	541
4.26	1085	930	772	761	658	755	712	538
4.264	1513	887	835	843	778	725	702	580
4.268	2438	1001	823	1056	982	729	710	547
4.272	3278	1107	842	1982	1336	760	750	554
4.276	4481	1617	1451	3364	1844	706	785	595
4.28	5212	3078	3311	5398	2442	776	760	527
4.284	5632	5460	7460	7499	3095	795	718	555
4.288	5432	9079	21813	9668	3511	755	798	539
4.292	5196	18170	36551	13956	3724	721	755	532
4.296	4576	26174	53944	14862	3788	709	734	583
4.3	3749	32414	72109	14413	3516	689	683	579
4.304	3038	34979	86150	9403	3035	709	707	573
4.308	2503	33839	93716	7609	2589	713	689	573
4.312	1851	31052	93392	6179	2159	742	745	596
4.316	1592	25789	84495	4776	1769	680	718	562
4.32	1337	20290	69180	3620	1493	668	699	550
4.324	1181	14893	54567	2887	1162	770	686	533
4.328	1062	8130	39577	2292	1099	722	770	552
4.332	992	5854	27606	1802	944	706	723	557
4.336	961	4482	17698	1529	817	736	732	565
4.34	937	3559	8742	1385	856	696	718	609
4.344	864	2650	5988	1257	799	679	741	549
4.348	744	2183	4395	1097	737	647	747	530
4.352	859	1884	3271	1029	694	695	742	546
4.356	799	1654	2477	947	686	688	746	560
4.36	766	1477	2097	915	665	711	760	601
4.364	804	1343	1800	886	713	697	747	546
4.368	786	1334	1608	871	714	675	681	552
4.372	702	1186	1372	866	676	670	703	518
4.376	823	1197	1403	839	660	703	719	547
4.38	787	1120	1238	782	637	726	715	596
4.384	734	1032	1161	835	586	731	773	574
4.388	763	1026	1125	770	668	735	765	593
4.392	753	1017	1091	701	624	736	803	546
4.396	723	1021	1014	739	678	697	687	532
4.4	715	952	1038	775	661	705	679	577
4.404	688	990	944	725	639	698	727	570
4.409	755	961	1039	696	598	688	746	578
4.412	657	904	962	736	595	726	707	548
4.416	727	921	903	732	638	712	722	570
4.42	704	957	940	771	631	700	712	566
4.424	705	874	882	726	588	684	757	530
4.428	708	896	861	742	627	725	713	578
4.432	748	913	814	706	649	700	693	549
4.437	736	980	830	722	637	690	631	533
4.441	715	885	869	727	638	701	648	540
4.445	727	915	871	723	669	677	692	561
4.449	701	857	863	705	641	693	735	575
4.452	748	871	774	731	634	726	733	553
4.456	701	861	820	715	675	685	707	520
4.46	677	893	797	776	628	690	680	575
4.464	692	1011	781	820	649	718	709	600
4.468	681	908	755	714	611	679	732	534
4.473	718	859	759	750	642	670	726	576
4.477	671	887	832	704	630	686	711	579
4.481	719	846	870	736	585	703	676	585
4.484	713	909	813	742	606	712	722	572
4.489	743	891	842	689	604	768	666	566
4.492	694	855	794	756	646	725	709	556
4.496	624	766	843	701	624	676	721	604
4.5	748	875	746	670	656	699	652	537
4.504	738	864	795	679	613	732	706	584
4.508	638	848	757	668	624	705	709	542
4.513	664	801	824	711	575	700	689	564
4.517	696	876	770	708	611	714	733	579
4.521	681	801	774	711	572	685	692	602
4.524	692	817	782	656	677	645	724	548
4.528	686	858	822	639	847	729	676	604
4.532	709	850	779	745	1143	706	710	549
4.537	665	822	769	714	1861	718	693	575
4.541	671	918	754	679	2945	737	660	566
4.545	691	801	918	701	5181	729	718	484
4.549	691	833	1185	670	7657	724	716	556
4.553	715	866	1994	689	13491	652	782	602
4.557	627	912	4245	711	19423	660	673	593
4.561	680	780	10707	639	27742	699	664	554
4.564	696	872	22298	627	33858	719	686	531
4.568	690	873	44665	622	38209	723	694	569
4.573	639	840	73254	673	41164	697	727	530
4.577	745	874	112962	703	39882	713	680	547
4.581	705	863	158264	731	35074	721	664	595
4.585	655	811	207268	729	28066	679	688	556
4.589	696	838	219029	753	20139	667	687	563
4.593	653	844	240106	780	14385	757	664	586
4.596	684	803	311959	785	10228	685	712	531
4.601	698	864	323521	840	6064	689	677	569
4.605	719	860	316695	900	4251	694	724	549
4.609	695	814	290216	848	2892	697	644	524
4.613	700	924	244552	862	2194	688	693	534
4.617	749	816	176099	841	1654	712	708	557
4.621	763	848	110461	778	1359	666	704	532
4.625	710	820	70418	782	1175	673	621	609
4.629	770	853	39119	768	962	729	726	534
4.633	680	822	17257	779	957	659	701	575
4.636	790	849	8114	743	884	662	732	592
4.641	823	792	4985	734	863	628	719	531
4.645	890	920	3392	762	838	734	729	601
4.649	837	903	2517	762	852	724	677	551
4.653	815	908	2031	737	771	662	701	552
4.657	790	917	1720	701	707	651	699	560
4.661	862	829	1478	755	748	720	735	569
4.665	812	811	1339	669	753	694	712	520
4.669	796	945	1335	684	755	741	743	523
4.673	833	876	1211	697	688	657	764	547
4.677	750	867	1139	727	701	713	741	525
4.681	792	919	1102	768	702	739	755	556
4.685	798	917	1024	789	651	695	748	499
4.689	757	904	1049	701	681	711	750	580
4.693	820	919	1017	709	649	758	726	581
4.696	792	976	931	779	676	700	758	527
4.701	743	1004	916	684	633	736	730	530
4.705	829	953	932	746	659	666	692	546
4.709	790	960	842	697	641	676	674	562
4.713	816	880	840	701	686	660	745	559
4.717	784	1000	837	666	688	696	719	580
4.721	748	958	760	740	622	635	654	548
4.725	776	906	853	672	635	711	716	523
4.729	759	921	892	682	692	606	622	549
4.733	739	908	805	726	677	702	725	510
4.737	784	980	869	673	617	690	687	601
4.741	764	896	832	678	651	693	658	593
4.745	735	927	797	700	641	711	689	535
4.749	738	938	790	664	617	677	678	543
4.753	758	873	790	684	650	687	785	612
4.757	740	866	773	671	572	638	657	595
4.761	746	926	776	694	615	658	678	524
4.765	742	988	757	650	666	687	692	564
4.769	743	861	751	703	636	671	639	571
4.773	695	877	742	707	599	714	663	582
4.777	772	842	732	641	626	665	687	537
4.781	728	859	740	699	676	678	646	551
4.785	795	862	763	678	652	640	684	526
4.789	776	873	669	748	727	625	682	572
4.793	787	927	748	736	828	717	661	534
4.797	681	804	690	760	991	691	738	531
4.801	779	854	764	850	1038	706	725	530
4.805	738	893	747	975	1303	676	655	587
4.809	737	887	801	1056	1447	670	712	603
4.813	782	888	773	1157	1645	707	702	534
4.817	748	841	815	1349	1818	744	765	577
4.821	730	839	863	1560	1806	709	728	502
4.825	748	874	1020	1547	1715	710	739	536
4.829	688	921	1115	1539	1693	687	686	538
4.833	718	868	1278	1558	1513	762	686	499
4.837	705	873	1454	1378	1381	691	738	555
4.841	713	793	1534	1352	1332	741	752	549
4.845	710	881	1647	1221	1148	743	711	536
4.849	739	840	1651	1132	1021	713	731	556
4.853	717	843	1560	1006	954	761	734	557
4.857	727	827	1503	938	845	695	711	591
4.861	655	851	1331	922	795	714	705	559
4.865	664	879	1285	870	749	687	772	523
4.869	708	869	1170	775	741	682	718	556
4.873	690	854	1085	777	734	723	710	534
4.877	663	786	958	734	699	701	699	554
4.881	699	801	872	729	664	650	667	495
4.885	710	770	939	740	634	737	698	535
4.889	679	848	799	705	676	684	696	543
4.893	729	809	780	705	613	687	729	574
4.897	653	795	741	712	662	687	710	581
4.901	702	796	777	722	714	745	677	548
4.905	714	842	793	667	675	666	733	525
4.909	677	823	752	695	617	664	726	568
4.913	677	777	751	708	607	683	691	581
4.917	720	765	751	669	574	692	697	576
4.921	679	847	731	670	572	642	693	542
4.925	698	845	736	665	649	698	706	495
4.929	695	789	755	653	646	707	699	542
4.933	661	773	746	676	642	662	701	557
4.937	633	816	736	727	584	652	694	592
4.941	700	842	761	663	654	664	686	594
4.945	736	845	737	752	613	655	683	553
4.949	705	847	741	772	589	680	658	520
4.953	617	846	718	684	620	679	675	512
4.957	742	740	747	744	635	680	715	536
4.961	617	786	703	839	651	660	715	586
4.965	683	796	779	809	607	716	652	569
4.969	663	789	705	891	617	660	645	543
4.973	671	828	660	919	705	670	674	565
4.977	666	739	710	925	737	696	676	570
4.981	655	837	725	1082	801	688	665	537
4.985	706	848	685	1302	926	630	682	556
4.989	689	794	641	1709	1098	645	692	575
4.993	663	815	684	2162	1450	653	683	581
4.997	694	863	689	2904	1781	691	740	541
5.001	615	830	832	3796	2024	627	622	575
5.005	658	796	989	4610	2537	693	702	529
5.009	625	774	1258	5282	2674	665	627	543
5.013	667	767	1685	5934	2807	655	704	550
5.017	675	821	2509	6359	2802	698	669	533
5.021	654	818	3337	6216	2673	655	685	553
5.025	724	825	4338	5726	2365	689	696	539
5.029	634	818	5495	5211	2242	683	678	541
5.033	670	823	6015	4497	1951	643	697	543
5.037	665	820	6494	3589	1609	694	695	602
5.041	687	831	6599	2901	1341	663	703	575
5.045	608	829	6156	2299	1128	632	666	490
5.049	643	797	5592	1873	979	705	652	574
5.053	675	767	4677	1542	919	703	702	528
5.057	665	872	3809	1314	904	649	663	528
5.061	658	819	3184	1248	791	648	697	523
5.065	674	776	2486	1078	742	675	704	549
5.069	693	819	2029	1020	766	670	628	551
5.073	696	790	1588	1015	711	661	731	553
5.077	663	798	1354	906	705	702	695	527
5.081	706	806	1202	944	709	693	699	549
5.085	631	818	1027	916	700	659	715	579
5.089	671	809	950	980	702	707	671	556
5.093	678	793	862	924	745	675	692	588
5.097	633	800	873	1009	774	644	704	570
5.101	763	809	761	1049	734	689	643	611
5.105	696	794	866	1132	832	701	688	503
5.109	673	763	844	1039	801	654	717	586
5.113	721	826	770	1078	763	692	685	563
5.117	635	799	749	1150	852	657	700	541
5.121	721	880	797	1119	830	620	676	545
5.125	703	844	800	1095	870	667	726	575
5.129	684	822	762	1104	930	698	643	548
5.133	666	868	736	1165	835	628	664	568
5.137	758	783	745	1073	869	734	739	531
5.141	646	864	837	1067	813	656	694	523
5.145	654	832	869	1106	914	735	705	593
5.149	685	832	1011	1258	963	706	739	536
5.153	656	792	1017	1314	1003	687	796	550
5.157	724	863	1019	1530	1095	673	1012	587
5.161	686	842	1006	1747	1218	716	1126	591
5.165	686	800	1110	1985	1244	707	1421	560
5.169	644	794	1119	2181	1335	689	1532	586
5.173	675	770	1181	2322	1383	656	1640	563
5.177	701	874	1432	2418	1332	703	1697	587
5.181	604	840	1716	2187	1179	707	1692	530
5.185	669	795	2075	2105	1266	685	1550	551
5.189	658	830	2274	2091	1214	706	1499	568
5.193	691	775	2554	1813	1087	669	1459	549
5.197	679	806	2539	1634	1035	692	1410	594
5.201	669	779	2649	1473	875	700	1329	510
5.205	692	750	2497	1291	846	642	1259	515
5.209	598	840	2292	1148	762	645	1290	601
5.213	648	797	2047	1018	758	760	1262	584
5.217	623	789	1894	985	792	641	1245	540
5.221	704	786	1614	974	727	636	1231	529
5.225	624	793	1507	923	726	727	1210	579
5.229	658	830	1290	831	661	693	1114	581
5.233	641	751	1138	877	688	694	1012	610
5.237	614	763	1026	835	645	672	1108	585
5.241	637	821	969	828	632	672	1052	489
5.245	718	743	963	858	687	644	1055	538
5.249	646	782	840	784	705	684	950	554
5.253	637	801	857	780	690	674	1006	542
5.257	635	795	833	765	606	673	881	509
5.261	650	769	799	690	623	671	871	546
5.265	703	776	787	747	648	669	855	556
5.269	584	753	761	727	619	628	838	560
5.273	618	793	822	787	602	694	845	592
5.277	658	765	765	730	618	630	884	586
5.281	621	742	715	764	642	675	833	531
5.285	630	777	765	794	648	662	835	543
5.289	637	719	782	747	619	648	827	582
5.293	647	820	769	723	657	657	776	558
5.297	638	715	681	712	631	618	826	587
5.301	663	783	683	723	648	674	801	572
5.305	635	787	737	752	638	686	769	572
5.309	636	742	667	733	636	685	764	587
5.313	604	781	688	729	628	685	735	535
5.317	631	781	719	725	629	647	783	548
5.321	617	834	693	789	625	708	719	575
5.325	668	762	691	685	697	695	814	534
5.329	614	752	660	710	679	653	726	591
5.333	632	817	677	740	743	633	760	556
5.337	666	827	711	751	834	676	676	548
5.341	702	775	728	727	921	672	708	530
5.345	585	768	785	744	1044	676	747	550
5.349	679	740	913	697	1181	669	716	536
5.353	669	796	1354	713	1200	665	641	549
5.357	644	751	1925	795	1334	657	719	529
5.361	702	773	2627	712	1272	698	682	526
5.365	640	737	3703	710	1364	642	730	567
5.369	638	753	4888	785	1308	676	655	492
5.373	668	738	6023	702	1257	681	729	537
5.377	614	769	6828	701	1103	628	734	551
5.381	612	654	7457	737	1010	657	710	550
5.385	635	732	8612	799	938	669	700	565
5.389	625	698	7141	718	860	681	726	546
5.393	625	723	6531	668	798	658	692	561
5.397	622	694	5668	728	767	653	699	554
5.401	645	800	4949	752	685	629	650	535
5.405	650	770	3841	704	749	610	709	542
5.409	678	752	2932	647	638	670	712	577
5.413	630	734	2464	739	639	705	703	555
5.417	654	786	1963	713	680	626	680	543
5.421	629	756	1562	714	631	598	674	559
5.425	546	756	1310	675	604	664	755	559
5.429	624	771	1179	682	690	633	655	518
5.433	700	772	996	695	649	657	670	562
5.437	612	774	947	697	674	629	723	589
5.441	610	760	869	714	641	663	665	533
5.445	651	740	851	703	765	688	686	560
5.449	660	724	855	913	920	635	678	565
5.453	648	757	774	1305	1324	687	710	529
5.457	602	732	756	2348	1982	670	640	573
5.461	631	743	712	3992	2734	695	678	571
5.465	655	750	754	7542	3816	638	679	563
5.469	644	733	776	11339	5279	686	674	540
5.473	638	731	1145	16908	8300	662	690	543
5.477	627	752	1960	21008	9711	637	639	549
5.481	579	757	3767	23737	10766	694	701	544
5.485	627	720	8113	25375	10931	677	669	552
5.489	669	804	12379	25403	10307	613	706	547
5.493	598	749	18687	24452	7548	704	705	546
5.497	622	704	23699	22193	6752	668	625	591
5.501	619	724	28202	19081	6711	657	710	529
5.505	656	722	30184	14730	4864	630	684	565
5.509	626	771	30477	11884	3896	638	629	542
5.513	624	769	30665	9453	3163	628	668	566
5.517	624	809	28482	7192	2566	655	660	571
5.521	686	788	24922	4510	2132	681	625	567
5.525	623	768	20020	3468	1805	670	657	531
5.529	681	772	15865	2783	1504	650	634	599
5.533	611	767	11994	2317	1334	654	650	531
5.537	686	773	9169	1989	1137	674	661	520
5.541	619	750	7033	1666	1045	663	657	566
5.545	625	736	4531	1493	993	683	668	523
5.549	667	753	3727	1383	921	620	661	524
5.553	632	780	3010	1277	895	686	681	556
5.557	601	766	2449	1116	839	642	666	588
5.561	607	763	2032	1052	839	618	700	568
5.565	654	759	1779	1033	742	641	637	567
5.569	612	765	1552	1055	775	644	639	570
5.573	625	717	1414	990	762	664	705	570
5.577	639	723	1290	1017	729	676	686	533
5.581	660	728	1213	902	714	737	683	550
5.585	592	756	1188	860	669	666	699	594
5.589	606	767	1161	866	736	676	669	507
5.593	660	730	1036	852	718	676	699	533
5.597	620	764	998	861	641	678	661	525
5.601	669	755	974	788	722	614	636	596
5.605	604	728	924	864	655	648	707	545
5.609	598	755	923	810	664	652	644	536
5.613	629	721	876	809	632	681	657	507
5.617	646	714	829	773	631	621	601	527
5.621	576	709	800	855	666	641	670	528
5.625	653	697	880	991	635	661	654	530
5.629	651	762	803	903	635	665	639	572
5.633	613	746	766	875	661	629	652	602
5.637	649	686	842	818	613	635	729	522
5.641	636	786	837	879	622	597	631	604
5.645	627	728	745	882	660	616	630	581
5.649	610	794	756	938	741	676	665	545
5.653	600	714	751	1104	754	680	631	557
5.657	643	723	803	1269	881	678	705	558
5.661	608	744	807	1570	1008	621	678	596
5.665	642	734	784	1904	1124	666	660	543
5.669	632	744	813	2157	1221	648	694	591
5.673	615	745	857	2425	1327	605	689	600
5.677	651	720	960	2497	1383	669	656	592
5.681	708	812	1202	2517	1393	658	683	598
5.685	668	768	1461	2398	1335	664	604	554
5.689	670	713	1923	2318	1276	648	672	569
5.693	642	734	2201	2099	1206	668	625	563
5.697	654	809	2400	1888	1128	650	715	562
5.701	681	725	2558	1831	1077	655	668	568
5.705	662	739	2511	1526	1051	648	603	535
5.709	697	757	2562	1425	930	641	722	541
5.713	672	720	2390	1350	855	690	707	571
5.717	634	776	2166	1274	918	637	622	595
5.721	786	807	1918	1026	829	621	665	513
5.725	834	756	1788	1035	778	649	716	541
5.729	1104	699	1615	993	824	604	810	507
5.733	1506	708	1474	1061	836	613	925	570
5.737	2126	654	1305	971	931	602	911	531
5.741	2974	779	1244	1057	1061	683	995	534
5.745	4139	745	1271	1180	1298	646	988	581
5.749	5585	754	1096	1393	1680	678	1055	532
5.753	7094	818	1108	1718	2200	701	989	533
5.757	9047	953	1034	2386	3013	670	956	608
5.761	11105	1055	1051	3076	3595	773	1025	560
5.765	12436	1313	1170	4088	4764	888	964	509
5.769	13343	1644	1216	4980	5800	1032	1033	559
5.773	13295	2145	1462	6209	6925	1201	1054	556
5.777	12614	2901	1754	7458	7343	1580	1234	552
5.781	11535	3643	2300	7930	7739	2045	1434	562
5.785	10041	4608	2893	8349	7482	2623	1779	589
5.789	8281	6015	3824	8640	6937	3198	2158	558
5.793	6996	6918	4673	8118	6232	3865	2686	570
5.797	5272	7569	5843	7512	5498	4361	3204	572
5.801	3768	8003	6357	6422	4683	4573	3731	571
5.805	2987	7757	7000	5362	3849	5175	4171	515
5.809	2166	7160	7175	4423	2943	5247	4521	529
5.813	1638	6174	7082	3450	2239	4979	4661	552
5.817	1404	5395	6801	2642	1822	4436	4677	521
5.821	1159	4729	6076	2110	1464	4011	4487	571
5.825	1082	3799	4636	1635	1170	3307	4131	560
5.829	972	2968	3965	1387	977	2778	3601	576
5.833	893	2293	3132	1175	859	2355	3009	559
5.837	858	1891	2438	1089	885	1975	2620	607
5.841	905	1598	1872	1027	762	1648	2243	601
5.845	840	1238	1496	856	779	1353	1909	637
5.849	759	1167	1285	857	802	1244	1613	586
5.853	789	1082	1106	887	744	1190	1389	578
5.857	778	930	996	795	768	975	1297	547
5.861	719	863	914	808	719	979	1193	548
5.865	737	924	842	763	745	874	1042	543
5.869	785	900	831	766	698	865	1021	589
5.873	714	852	878	834	657	903	962	583
5.877	759	866	846	770	666	840	941	535
5.881	713	875	760	769	649	848	925	552
5.885	744	803	801	777	706	862	947	572
5.889	756	765	810	806	691	807	857	597
5.893	682	896	734	723	581	849	878	580
5.897	674	875	749	705	675	832	837	599
5.901	668	822	819	781	634	823	872	573
5.905	699	816	786	759	653	788	834	537
5.909	659	777	803	739	686	794	808	534
5.913	636	803	726	739	659	818	802	536
5.917	635	773	760	707	653	828	792	494
5.921	681	792	778	681	627	833	786	519
5.925	685	819	771	710	606	788	811	576
5.929	591	841	733	661	617	819	758	519
5.933	630	810	728	684	621	745	741	548
5.937	684	776	746	744	615	722	834	560
5.941	639	812	718	724	573	760	782	522
5.945	610	764	704	746	697	745	709	562
5.949	639	796	740	745	616	808	803	546
5.953	653	733	722	703	611	771	739	570
5.957	695	798	709	651	622	673	775	515
5.961	667	772	759	680	632	701	760	578
5.965	675	765	755	728	640	715	782	546
5.969	671	847	767	681	589	718	743	609
5.973	641	783	746	720	571	662	698	502
5.977	653	814	687	677	607	733	688	572
5.981	589	806	747	734	613	696	716	508
5.985	611	728	738	683	588	685	725	574
5.989	629	768	692	649	651	690	722	546
5.993	643	782	728	718	568	744	708	544
5.997	632	740	742	659	688	708	758	586
6.001	617	759	686	718	604	740	690	498
6.005	648	779	683	712	623	703	713	487
6.009	657	775	717	604	599	696	677	568
6.013	654	697	717	594	643	671	719	523
6.017	602	768	696	676	567	686	717	487
6.021	595	755	703	697	624	705	706	496
6.025	621	714	722	680	570	667	696	565
6.029	629	745	672	673	607	705	659	559
6.033	615	760	681	682	619	709	777	515
6.037	619	696	719	684	581	685	713	583
6.041	606	806	681	688	618	697	730	497
6.045	618	759	731	731	568	712	724	539
6.049	658	728	707	683	630	643	721	566
6.053	652	746	701	653	621	693	682	559
6.057	660	754	755	706	639	669	660	540
6.061	613	714	698	661	656	701	760	504
6.065	619	778	684	702	592	711	684	575
6.069	607	721	739	646	579	647	669	550
6.073	604	758	719	669	616	737	675	595
6.077	625	727	682	618	585	613	679	576
6.081	628	729	705	640	618	740	684	539
6.085	654	754	707	722	645	670	662	577
6.089	657	755	699	677	598	697	689	509
6.093	618	747	706	636	587	687	641	584
6.097	644	764	698	681	589	700	696	585
6.101	626	749	675	677	629	628	711	505
6.105	662	725	723	668	603	675	644	544
6.109	657	748	652	689	598	686	656	566
6.113	578	768	673	656	592	655	676	600
6.117	624	649	729	657	597	666	666	586
6.121	598	771	712	657	644	708	697	536
6.125	569	663	690	678	564	739	655	519
6.129	570	737	637	652	614	718	714	569
6.133	616	785	637	647	567	743	700	575
6.137	668	712	714	635	529	673	657	555
6.141	644	756	680	655	590	621	694	572
6.145	682	781	723	649	596	684	654	533
6.149	660	752	653	665	583	626	670	562
6.153	598	733	685	666	605	678	696	571
6.157	642	729	692	603	590	694	675	633
6.161	622	686	691	638	585	708	643	588
6.165	633	715	686	664	584	689	624	503
6.169	618	728	685	646	591	704	743	499
6.173	634	748	711	654	579	706	660	531
6.177	619	805	706	655	609	717	679	591
6.181	664	691	691	611	633	756	691	531
6.185	679	735	682	598	573	726	638	578
6.189	581	693	614	629	632	713	673	546
6.193	631	754	740	622	575	709	691	577
6.197	591	702	672	612	562	697	699	588
6.201	644	706	735	662	563	739	676	526
6.205	586	797	659	613	574	699	742	546
6.209	603	696	708	627	581	733	633	570
6.213	618	778	700	676	618	656	723	551
6.217	613	661	672	642	583	654	658	613
6.221	633	720	670	668	557	658	707	578
6.225	635	674	713	651	592	716	728	536
6.229	603	676	706	588	601	683	699	576
6.233	652	665	645	675	551	678	688	534
6.237	630	739	684	647	629	668	697	524
6.241	659	752	662	690	560	640	732	520
6.245	639	721	674	664	570	684	713	535
6.249	654	759	661	640	567	710	672	531
6.253	607	716	662	692	577	654	756	542
6.257	596	755	637	644	604	711	735	577
6.261	652	739	672	622	548	757	712	542
6.265	614	717	692	694	560	700	686	517
6.269	627	723	699	691	543	732	714	553
6.273	629	757	645	649	600	733	699	523
6.277	641	758	668	638	1128	685	655	520
6.281	634	747	720	705	3282	709	662	538
6.285	604	680	744	630	4808	12134	705	547
6.289	643	651	693	2114	6157	21398	721	486
6.293	619	693	679	3615	7709	28918	734	556
6.297	602	731	797	4441	7786	34063	767	621
6.301	627	746	3908	5008	7749	36199	8388	566
6.305	607	724	6639	5437	7838	37064	13138	540
6.309	623	692	8685	5565	7287	35851	15874	558
6.313	596	714	10297	5261	6298	34320	17437	519
6.317	590	682	10974	5012	5680	31927	18256	565
6.321	646	705	10842	4904	5311	28097	18264	537
6.325	560	726	10636	4537	4993	25345	17488	585
6.329	575	746	9936	4020	4619	22524	16220	595
6.333	637	703	9208	3904	4229	19471	15126	526
6.337	626	720	9195	3393	3948	17371	13659	562
6.341	602	751	8473	3318	3422	15820	12324	506
6.345	610	684	7270	3038	3194	14250	11698	532
6.349	592	707	6092	2847	2940	12395	10450	554
6.353	651	739	5443	2536	2817	10108	9375	530
6.357	593	738	4992	2405	2607	10701	8984	578
6.361	596	727	4631	2226	2339	9244	7680	556
6.365	562	665	3962	2207	2266	8210	6973	499
6.369	641	735	3747	1990	2152	7632	6977	548
6.373	621	772	3420	1842	1942	7040	6913	559
6.377	689	772	3350	1838	1940	6116	5814	590
6.381	609	689	3164	1732	1727	5474	5432	582
6.385	598	738	2672	1565	1743	5196	5170	629
6.389	548	672	2654	1577	1638	4826	4889	673
6.393	629	675	2495	1623	1553	4469	4448	692
6.397	652	728	2374	1444	1527	4270	4358	786
6.401	564	658	2314	1411	1400	4082	4164	808
6.405	579	695	2185	1300	1390	3857	4097	916
6.409	596	729	1979	1305	1276	3705	3793	1012
6.413	624	713	2005	1247	1295	3415	3642	1067
6.417	545	714	1803	1189	1258	3509	3500	1137
6.421	597	723	1793	1140	1208	3206	3429	1199
6.425	602	759	1676	1214	1211	3119	3191	1137
6.429	577	733	1677	1223	1114	3053	3020	1146
6.433	604	706	1586	1071	1171	2813	3045	1101
6.437	604	741	1553	1100	1028	2890	2855	984
6.441	619	690	1517	1134	1012	2759	2670	950
6.445	649	754	1435	1103	1018	2662	2667	926
6.45	656	691	1350	993	937	2567	2588	857
6.453	630	713	1378	1019	897	2565	2497	822
6.457	581	714	1351	1052	935	2325	2472	816
6.461	590	657	1353	932	944	2344	2281	707
6.465	605	658	1339	939	927	2342	2368	696
6.469	647	687	1237	910	947	2227	2152	623
6.474	563	733	1140	957	918	2171	2196	668
6.478	635	775	1223	891	929	2137	2099	579
6.482	601	689	1179	879	897	1987	2061	584
6.485	535	693	1165	895	898	2061	1964	660
6.49	602	690	1057	871	939	2018	2062	602
6.493	603	678	1086	924	982	1922	1922	574
6.497	619	712	1100	819	932	1812	1846	600
6.501	625	735	1027	869	975	1808	1812	589
6.505	648	730	1099	894	1089	1765	1753	576
6.51	618	676	1085	820	1033	1807	1738	543
6.514	601	742	1046	854	1076	1688	1679	595
6.518	545	717	1047	825	1046	1663	1676	513
6.522	605	707	968	833	983	1649	1610	608
6.525	606	760	1021	805	969	1593	1583	557
6.529	536	774	1021	810	911	1596	1581	603
6.533	641	737	1043	784	927	1529	1560	626
6.537	590	708	1018	793	812	1536	1414	586
6.541	585	705	964	850	856	1469	1521	587
6.545	625	752	975	800	790	1430	1439	597
6.55	563	757	926	830	783	1482	1475	613
6.554	597	714	941	762	755	1438	1412	542
6.558	636	782	952	766	761	1409	1390	579
6.562	632	725	997	806	794	1377	1354	610
6.565	645	652	882	776	704	1317	1339	599
6.569	614	686	971	807	758	1384	1360	586
6.574	576	697	864	836	665	1351	1266	559
6.578	646	770	884	772	699	1291	1259	595
6.582	589	687	887	729	680	1349	1261	578
6.586	594	736	886	727	677	1322	1243	583
6.59	608	760	893	749	727	1319	1251	558
6.594	637	706	853	670	706	1325	1187	508
6.597	614	735	908	677	660	1185	1181	573
6.602	607	724	855	740	665	1294	1246	568
6.606	604	712	857	773	684	1211	1159	578
6.61	623	682	741	779	678	1229	1248	579
6.614	593	740	863	753	631	1147	1170	572
6.618	618	729	816	756	693	1237	1166	547
6.622	615	769	809	672	715	1225	1166	568
6.626	674	699	870	720	642	1204	1142	595
6.63	612	690	837	719	685	1211	1159	598
6.634	601	704	863	703	715	1177	1140	589
6.638	637	692	766	716	697	1233	1157	548
6.642	585	764	849	724	646	1155	1080	598
6.646	613	674	847	688	664	1087	1181	547
6.65	647	688	819	718	672	1164	1143	576
6.654	627	695	817	710	659	1105	1115	546
6.658	586	678	812	694	642	1151	1099	518
6.662	577	716	778	743	711	1075	1093	540
6.666	619	687	785	701	645	1089	1076	560
6.67	647	645	788	725	707	1065	987	514
6.674	646	693	792	669	678	1112	1086	558
6.678	582	715	806	656	693	1030	1093	536
6.682	628	712	808	710	691	1134	1023	533
6.686	613	609	749	712	753	1050	1027	554
6.69	655	763	758	725	797	1034	1063	564
6.694	624	724	853	677	823	1049	1050	556
6.698	669	691	801	725	915	1065	1050	572
6.702	714	762	770	678	919	1072	1048	535
6.706	632	656	762	677	912	1037	959	543
6.71	640	710	798	680	956	1108	970	535
6.714	673	680	782	759	948	1080	994	548
6.718	632	706	781	688	956	1033	998	562
6.722	676	704	772	728	910	1097	1011	510
6.726	612	725	809	689	842	1127	959	553
6.73	629	739	787	730	866	1133	940	532
6.734	677	745	775	741	815	1135	970	563
6.738	656	713	807	713	722	1089	985	532
6.742	643	723	754	690	678	1176	1020	551
6.746	588	747	772	689	680	1122	962	563
6.75	614	755	754	668	667	1056	929	535
6.754	580	660	781	691	628	1053	1016	533
6.758	640	693	800	636	672	1023	953	571
6.762	629	743	776	687	660	1037	993	548
6.766	641	669	701	684	649	1035	1014	520
6.77	647	685	788	641	582	997	964	507
6.774	661	677	741	733	605	1023	894	575
6.778	689	681	745	670	660	1014	923	490
6.782	714	675	731	690	589	961	903	549
6.786	702	716	707	670	664	955	994	515
6.79	799	759	776	624	587	984	938	531
6.794	783	702	770	694	665	938	965	593
6.798	774	727	768	676	667	966	906	603
6.802	755	665	768	736	611	908	928	569
6.806	780	779	708	774	709	901	975	504
6.81	745	801	732	799	853	945	902	577
6.814	761	795	807	1124	1152	876	877	515
6.818	732	828	718	1646	1624	912	912	554
6.822	730	797	730	2699	2413	922	898	519
6.826	701	846	784	4370	3659	925	893	539
6.83	742	891	823	7092	5185	915	913	519
6.834	775	912	888	11774	7128	851	886	592
6.838	820	962	1179	16750	10059	955	892	531
6.842	767	954	1889	22349	12269	917	875	553
6.846	754	965	3342	29177	15095	901	872	524
6.85	701	907	5259	35411	17099	840	918	578
6.854	635	893	9081	40801	18397	857	912	510
6.858	672	864	13349	42996	18174	838	904	548
6.862	690	859	19136	43574	17180	852	905	570
6.866	723	845	25149	44040	16465	889	867	521
6.87	693	802	33706	41838	14732	902	867	523
6.874	628	845	40888	36361	12635	824	915	541
6.878	707	872	46438	30501	10291	842	829	587
6.882	712	810	49997	23159	7680	862	812	508
6.886	707	856	50863	17587	6061	903	832	545
6.89	706	840	48848	13877	4687	871	870	498
6.894	718	868	44851	9733	3582	847	791	566
6.898	683	889	40085	7420	2965	841	882	582
6.902	648	837	33986	5746	2337	888	774	548
6.906	664	765	27109	4401	1912	858	777	580
6.91	653	855	20796	3428	1645	845	847	550
6.914	643	862	15871	2797	1306	914	779	516
6.918	659	808	12214	2365	1284	844	833	576
6.922	675	882	9125	1979	1163	945	814	536
6.926	619	834	6370	1746	1009	856	863	533
6.93	684	897	4962	1561	970	825	820	562
6.934	644	858	3711	1381	939	776	816	582
6.938	643	849	3040	1298	837	854	812	567
6.942	592	873	2633	1213	814	840	884	536
6.946	656	771	2098	1105	833	806	821	527
6.95	620	851	2042	1079	794	892	832	558
6.954	615	853	1769	1069	734	856	834	549
6.958	665	898	1577	993	745	864	816	542
6.962	620	897	1454	991	786	841	783	558
6.966	652	939	1301	934	768	841	804	583
6.97	655	889	1258	914	808	813	781	520
6.974	622	840	1188	873	861	796	793	520
6.978	596	855	1182	878	922	844	903	537
6.982	596	877	1111	814	1013	857	819	571
6.986	643	817	1042	861	1042	790	817	501
6.99	689	827	1040	799	1168	775	818	592
6.994	620	864	989	842	1125	729	745	559
6.998	601	862	1067	798	1158	778	796	542
7.002	617	815	956	796	1240	833	773	570
7.006	681	814	922	824	1182	832	830	565
7.01	620	787	928	825	1182	800	826	565
7.014	634	785	903	796	1038	794	773	556
7.018	600	844	835	796	1017	785	814	537
7.022	660	818	807	772	935	832	758	557
7.026	628	790	920	758	901	829	819	537
7.03	614	801	839	731	818	872	798	528
7.034	615	769	843	763	806	756	798	558
7.038	663	825	867	766	777	827	808	508
7.042	681	838	823	712	705	869	817	524
7.046	645	911	761	702	670	832	812	541
7.05	717	903	829	730	625	804	793	561
7.054	647	970	818	717	614	804	782	544
7.058	677	1037	781	677	647	859	834	585
7.062	679	1013	807	694	717	839	792	516
7.066	647	1033	834	748	583	830	788	589
7.07	671	1118	806	705	605	795	829	495
7.074	678	1129	805	753	611	823	807	529
7.078	685	1084	737	705	628	783	775	550
7.082	630	1154	802	691	661	734	839	525
7.086	652	1146	717	710	628	780	787	565
7.09	718	1210	719	674	630	809	796	560
7.094	676	1170	758	685	651	813	834	568
7.098	646	1274	799	732	598	784	786	558
7.102	711	1199	746	618	594	800	754	530
7.106	684	1377	756	636	615	779	796	525
7.11	664	1438	691	687	600	785	800	545
7.114	693	1555	701	639	608	733	748	582
7.118	706	1726	719	741	582	858	761	520
7.122	677	1804	813	705	602	765	789	540
7.126	618	1861	730	712	632	797	776	546
7.13	660	1917	797	673	632	765	799	520
7.134	672	2000	739	696	646	780	808	555
7.138	692	2139	719	710	604	802	834	586
7.142	624	2183	702	664	640	829	807	587
7.146	631	2200	784	729	600	764	780	570
7.15	704	2260	751	706	619	750	789	526
7.154	623	2300	717	658	632	830	799	489
7.158	654	2291	770	684	633	784	749	500
7.162	685	2397	772	652	658	828	732	526
7.166	645	2459	748	642	644	742	766	517
7.17	653	2443	747	626	602	770	783	537
7.174	685	2477	718	670	589	707	743	547
7.178	658	2571	770	690	632	788	712	535
7.182	636	2625	743	608	652	744	753	597
7.186	639	2628	679	698	617	770	702	560
7.19	687	2741	718	680	608	833	794	510
7.194	674	2818	713	653	560	763	765	581
7.198	676	2899	705	700	641	733	790	574
7.202	691	2802	746	661	574	772	808	600
7.206	702	2901	744	709	593	778	768	565
7.21	642	2991	701	677	594	732	742	572
7.214	589	2816	727	661	593	776	795	532
7.218	664	3111	704	648	568	738	792	571
7.222	677	3010	743	679	618	790	780	528
7.226	680	3054	712	683	660	747	839	561
7.23	661	3167	691	650	583	744	765	557
7.234	635	3173	738	630	603	789	849	551
7.238	610	3204	691	609	607	727	875	551
7.242	645	3307	687	604	629	786	841	581
7.246	605	3554	742	639	609	708	818	534
7.25	710	3399	725	613	585	743	830	551
7.254	661	3543	664	610	561	728	766	534
7.258	662	3398	761	634	594	831	819	538
7.262	682	3713	690	656	560	762	784	544
7.266	646	3619	695	681	621	732	816	569
7.27	607	3623	728	611	600	689	790	561
7.274	638	3689	690	640	576	783	731	511
7.278	690	3661	731	617	592	750	796	529
7.282	644	3658	707	614	546	729	771	499
7.286	703	3791	669	673	628	751	756	483
7.29	634	3960	723	687	598	701	728	547
7.294	668	3904	688	637	617	755	742	571
7.298	624	3884	695	624	628	735	698	552
7.302	662	4051	731	647	581	794	791	539
7.306	616	4017	696	652	574	755	764	518
7.31	686	3961	734	657	602	725	742	517
7.314	718	4086	668	644	624	812	807	568
7.318	574	4107	677	658	631	748	797	555
7.322	645	4290	700	619	591	736	875	578
7.326	696	4150	672	636	619	775	877	545
7.33	657	4091	721	627	604	707	807	582
7.334	660	4374	729	605	648	761	849	556
7.338	662	4339	698	621	662	730	851	547
7.342	606	4391	731	650	746	700	801	596
7.346	589	4344	705	666	772	749	832	518
7.35	658	4438	688	648	719	723	924	597
7.354	670	4616	669	699	757	731	1493	573
7.358	640	4567	864	705	782	726	1714	514
7.362	664	4634	948	803	764	739	1807	574
7.366	620	4693	1042	740	762	693	1938	529
7.37	605	4767	1043	733	771	770	1990	535
7.374	599	4871	1089	747	719	669	1960	562
7.378	631	4709	1117	711	754	733	1916	527
7.382	662	4965	944	748	726	779	1882	563
7.386	678	4769	1094	768	722	745	1797	538
7.39	681	4872	1058	692	699	745	1735	544
7.394	630	4980	991	712	719	773	1636	530
7.398	628	4884	1016	729	698	764	1570	559
7.402	658	4963	927	713	689	756	1626	543
7.406	667	5029	857	769	656	807	1481	540
7.41	630	5069	885	733	655	795	1506	477
7.414	620	5098	939	709	644	715	1324	519
7.418	692	5137	894	649	674	743	1346	485
7.422	716	5340	887	694	677	727	1372	522
7.426	657	5379	829	672	626	762	1255	532
7.43	700	5558	830	696	647	781	1205	539
7.434	690	5452	887	680	659	758	1268	567
7.438	678	5393	914	673	655	740	1186	546
7.442	656	5532	847	739	597	795	1174	529
7.446	663	6860	844	619	606	786	1151	537
7.45	717	6982	810	634	594	807	1089	494
7.454	662	6882	792	731	625	785	1051	473
7.458	724	6991	769	653	586	748	1019	548
7.462	688	7125	722	649	588	748	1052	526
7.466	716	7139	831	611	596	726	1049	574
7.47	695	7262	776	689	665	734	990	575
7.474	685	7383	727	644	579	740	949	561
7.478	642	7352	795	704	616	822	990	556
7.482	702	7424	712	679	665	762	951	540
7.486	679	7150	720	684	618	816	988	561
7.49	722	7240	719	633	636	748	961	526
7.494	710	7358	749	650	574	748	950	521
7.498	753	7322	735	671	537	767	952	538
7.502	666	7505	753	677	588	758	926	563
7.506	659	6383	704	645	636	753	907	547
7.51	701	6417	695	672	597	749	967	580
7.514	698	6303	726	652	653	789	914	552
7.518	708	7491	716	689	601	738	884	510
7.522	644	7427	738	722	646	749	873	591
7.526	722	7517	779	729	686	727	927	556
7.53	748	7821	796	683	735	705	832	523
7.534	675	8541	791	671	682	715	877	577
7.538	724	8087	783	666	705	782	869	544
7.542	755	7681	803	706	737	759	866	602
7.546	699	7801	769	727	703	756	857	597
7.55	763	8062	788	727	713	683	889	584
7.554	734	8145	823	686	755	735	886	529
7.558	722	8213	771	757	720	798	859	573
7.562	748	8090	868	723	720	820	911	514
7.566	755	8395	830	684	661	858	892	529
7.57	711	8383	827	660	677	806	930	535
7.574	688	8380	788	754	653	815	950	553
7.578	761	8747	817	682	600	792	913	524
7.582	672	8559	850	680	640	766	915	558
7.586	694	8155	821	665	619	832	927	556
7.59	691	8605	746	594	587	796	917	512
7.594	702	8781	796	634	666	744	924	543
7.598	702	8882	735	638	586	766	945	547
7.602	667	7267	743	619	634	811	894	536
7.606	656	7255	780	603	635	734	891	543
7.61	701	8509	820	630	581	785	797	525
7.614	734	8789	744	656	563	728	872	578
7.618	679	8892	781	642	600	778	836	529
7.622	748	8888	714	682	597	751	742	502
7.626	692	8748	703	626	575	759	723	504
7.63	662	8888	703	641	578	700	879	484
7.634	705	9415	756	616	584	704	785	566
7.638	699	9563	670	635	619	746	742	551
7.642	655	9552	696	657	571	717	812	520
7.646	672	9563	736	613	577	771	815	543
7.65	672	9637	664	631	597	731	837	552
7.654	676	9858	709	651	569	709	787	533
7.658	657	9648	664	650	571	751	781	563
7.662	725	9816	678	571	615	733	789	525
7.666	694	10020	710	629	535	678	781	535
7.67	670	9794	665	662	551	765	821	580
7.674	671	9990	702	637	563	736	711	522
7.678	714	10194	668	659	568	796	771	517
7.682	655	10050	674	683	558	740	738	536
7.686	661	9077	715	647	559	755	740	508
7.69	630	5589	657	670	621	676	809	558
7.694	646	3974	687	663	597	768	719	556
7.698	669	3401	722	637	597	781	722	524
7.702	708	3087	656	615	583	714	746	538
7.706	662	2925	663	678	553	720	732	551
7.71	683	2706	687	593	548	728	726	513
7.714	685	2458	705	656	597	722	712	530
7.718	671	2436	673	631	612	701	810	522
7.722	710	2272	693	645	583	718	703	535
7.726	698	2162	715	636	552	730	758	533
7.73	681	2075	672	631	598	746	732	583
7.734	592	1999	700	647	503	653	770	594
7.738	642	1961	628	595	532	770	757	555
7.742	665	1889	715	642	595	756	717	541
7.746	618	1880	665	648	580	676	763	554
7.75	650	1750	744	578	561	724	703	506
7.754	627	1835	669	608	564	674	699	539
7.758	664	1775	685	625	588	749	761	581
7.762	699	1775	702	610	532	713	746	565
7.766	643	1804	675	588	566	677	784	489
7.77	654	1726	685	677	565	693	682	551
7.774	729	1729	724	640	540	665	747	520
7.778	575	1861	655	622	604	705	719	521
7.782	688	1933	707	584	594	739	770	585
7.786	724	2245	670	639	563	723	707	530
7.79	634	2221	694	611	579	678	711	501
7.794	621	2467	680	638	580	727	717	549
7.798	668	2426	651	609	558	717	758	511
7.802	664	2489	697	652	592	739	729	561
7.806	655	2633	711	551	558	653	738	506
7.81	687	2625	677	626	544	716	735	550
7.814	680	2608	733	592	586	666	711	485
7.818	631	2618	727	566	596	712	702	505
7.822	658	2717	671	620	553	681	706	593
7.826	654	2887	708	588	568	675	768	536
7.83	623	2737	685	604	581	741	722	519
7.834	651	2624	629	625	587	694	747	592
7.838	660	2585	645	614	545	692	767	540
7.842	616	2629	654	605	582	671	758	505
7.846	616	2662	699	652	606	756	730	570
7.85	664	2623	707	657	604	740	811	582
7.854	642	2402	705	682	594	728	690	545
7.858	693	2403	740	590	617	774	776	553
7.862	635	2340	671	650	579	722	717	528
7.866	722	2239	720	637	583	738	687	519
7.87	598	2201	718	578	587	720	719	553
7.874	634	2010	670	561	590	673	787	566
7.878	719	1946	663	659	551	728	723	568
7.882	602	1824	675	632	575	692	736	529
7.886	736	1752	697	608	601	727	703	554
7.89	682	1691	712	634	530	730	732	550
7.894	641	1638	661	636	595	746	715	542
7.898	655	1558	674	671	608	698	684	555
7.902	680	1605	668	601	597	699	687	525
7.906	660	1515	680	608	560	711	698	543
7.91	712	1443	702	620	594	696	713	552
7.914	653	1591	640	578	555	726	747	555
7.918	649	1484	699	641	574	713	665	553
7.922	702	1417	659	618	592	750	749	574
7.926	600	1436	723	591	581	712	715	571
7.93	677	1505	646	604	578	679	728	536
7.934	669	1354	676	686	545	663	687	577
7.938	633	1401	696	651	513	715	693	515
7.942	649	1319	687	641	565	739	645	537
7.946	633	1404	647	638	526	727	660	561
7.95	649	1400	646	613	579	647	754	485
7.954	637	1377	656	607	612	675	720	543
7.958	636	1378	661	585	594	779	719	585
7.962	692	1278	659	583	554	690	708	496
7.966	636	1359	664	613	565	729	736	595
7.97	626	1278	678	649	633	691	742	576
7.974	713	1283	637	652	626	670	751	537
7.978	663	1282	677	608	666	756	709	535
7.982	702	1294	709	687	684	774	767	563
7.986	750	1257	729	677	716	713	710	536
7.99	709	1352	713	672	763	772	711	526
7.994	657	1289	707	672	774	770	734	518
7.998	731	1276	693	688	746	730	752	583
[truncated: 8,400 more rows]

## Sheet: Quantifying
Ethyl Acetate	Concentration	Rel Peak Area	computed linear regression equation	Rel Area SCAM	Estimated concentration SCAM	Rel Area SCAP	Estimated concentration SCAP
	4e-05
	0.0002
	0.001
Acetic acid	0.0192
	0.0288
	0.0432
Isobutyl acetate	2.889e-07	0.0430495	y=4151*X - 0.1319	0.292003	0.000102121	0.0650336
	8.6667e-07	0.154509
	2.6e-06	0.96564
Isoamyl acetate	1.66667e-06	1.17213	y=7576*X + 0.6798	0.775099	1.25791e-05	1.13246
	5e-06	5.49452
	1.5e-05	11.7864
2-phenethyl acetate	2.889e-07	0.151536	y=5129* X -0.04011	1.18679	0.000239209	0.637576
	8.6667e-07	0.346494
	2.6e-06	1.30799
2-methylbutyl acetate	1.1111e-06	1.02078	y=8995 *X - 0.05042	0.555322	6.73421e-05	0.0854211
	3.3333e-06	2.85217
	1e-05	8.96843
methyl acetate	2.889e-07	0.0089568	y=75.22*X +0.004457	0.0182534	0.000183413	0
	8.6667e-07	0.00787467
	2.6e-06	0.0247905

## Sheet: Peaks_Focus_quantify
Peak #	~ RT	Identity	mm1	Area	Rel Area		mm2				mm3			SCAP	RT	Area		SCAM
1	1.279	CO2	1.287	149.846	0.0464453		1.283	155.905	0.0579375		1.283	115.059	0.0444184		1.283	108.389	0.0409105		1.283	156.491	0.0419621
2	1.343	acetaldehyde	1.355	406.153	0.125888		1.339	1121.81	0.416886		1.343	143.99	0.0555872		1.343	70.362	0.0265575		1.347	135.737	0.036397
3	1.411	ethanol	1.415	3630.39	1.12525		1.411	8809.22	3.27369		1.387	14606.8	5.63896		1.403	12110.8	4.5711		1.415	3059.31	0.820336
4	1.559	methyl acetate	1.575	25.406	0.00787467		1.591	24.102	0.0089568		1.571	64.216	0.0247905				0		1.571	68.073	0.0182534
5	NA	acetic acid	?	?	#VALUE!		?	?	#VALUE!				0		2.035	18518	6.98944				0
6	NA	2,3butanedione	?	?	#VALUE!		?	?	#VALUE!				0		2.063	6333.5	2.39053				0
7	NA	ethyl acetate	?	?	#VALUE!		?	?	#VALUE!						2.635	40.396
8	NA	isobutanol	?	?	#VALUE!		?	?	#VALUE!
9	2.904	acetion	2.956	20.648	0.00639991		2.94	23.402	0.00869667						2.916	125.34			2.948	21.393
10	2.972	propyl acetate	2.988	1927.53	0.597445		2.98	1483.51	0.551303		2.975	746.371	0.288136		2.971	21.63	0.00816406		2.996	14.316	0.00383875
11	3.212	1,3dioxolane,2,4,5trimethyl	NA	0	0		NA	0	0				0		3.212	66.72	0.0251829		3.228	54.09	0.0145039
12	3.24	acetal	3.252	49.244	0.0152633		3.236	188.668	0.0701129		3.235	61.984	0.0239289				0				0
13	3.4	isomayl alcohol	3.396	3155.73	0.978128		3.384	4056.17	1.50736		3.383	8643.6	3.33685		3.388	16606.5	6.268		3.392	3039.78	0.815099
14	3.46	1methyl2butanol	3.472	820.356	0.254272		3.46	2696.16	1.00195		3.46	5747.74	2.21891		3.452	3287.73	1.24093		3.468	2924.64	0.784224
15	3.776	? (acid)	?	?	#VALUE!		?	?	#VALUE!				0				0				0
16	4.285	isobutyl acetae	4.309	3115.44	0.96564		4.296	415.771	0.154509		4.296	111.513	0.0430495		4.284	172.301	0.0650336		4.304	1088.98	0.292003
17	4.75	? (acid)	?	?	#VALUE!		?	?	#VALUE!				0				0				0
18	8.563	isoamyl acetate	8.615	17726.9	5.49452		8.579	3154.11	1.17213		8.57	30530.8	11.7864		8.563	3000.36	1.13246		8.599	2890.61	0.775099
19	8.663	2methylbutyl acetate	8.683	28934.8	8.96843		8.679	7674.95	2.85217		8.678	2644.17	1.02078		8.667	226.316	0.0854211		8.699	2070.99	0.555322
20	23.378	benzeneethanol	23.363	8562.12	2.65386		23.391	811.467	0.301558		23.383	2871.49	1.10853		23.375	24133.5	9.10898		23.367	12334.2	3.30734
21	24.743	?	24.747	63.5	0.019682		24.744	87.037	0.0323447		NA	0	0		24.748	219.582	0.0828794		24.747	213.436	0.0572315
22	24.839	?	24.832	105.548	0.0327149		24.852	15.083	0.00560515		24.839	16.367	0.00631846		24.844	60.377	0.0227888		24.844	60.028	0.0160961
23	25.183	octanoic acid	?	?	#VALUE!		25.16	63.434	0.0235734						25.2	91.735			25.184	68.61
24	25.82	2phenethyl acetate	25.812	4219.97	1.30799		25.829	932.387	0.346494		25.844	392.53	0.151536		25.852	1689.21	0.637576		25.808	4425.96	1.18679
25	26.968	decanoic acid	?	?	#VALUE!		26.981	56.951	0.0211642		26.981	41.955	0.0161967		26.941	27.781	0.0104857		NA	0	0
26	28.065	ethyl laurate	?	?	#VALUE!		?	?	#VALUE!		0	0	0				0		NA	0	0
INTERNAL	18.067	internal standard (cineole)	18.1	3226.29			18.068	2690.92			18.06	2590.34			18.056	2649.42			18.088	3729.34
