# Supplementary material for: Metabolite exchange between microbiome members produces compounds that influence Drosophila behavior
Source: eLife. 2017 Jan 9;6:e18855. doi: 10.7554/eLife.18855 (PMC5222558; doi:10.7554/eLife.18855)
Supplement: Table 2—source data 6. — DOI: http://dx.doi.org/10.7554/eLife.18855.035 [file elife-18855-table2-data6.xlsx]

## Sheet: chromats
RT	Co_WT1	Co_WT2	co_adh1	co_adh2	co_adh_aa	co_adh_acet	co_adh_aa_acet	mm1	mm2	mm3	ajm50p	blank13	scaplp_wt	scaplp_adh
0.002	739	793	709	674	848	765	765	738	844	970	875	929	1007	922
0.006	745	821	718	725	715	750	778	835	829	943	908	953	919	893
0.01	751	754	709	752	718	782	785	754	835	1016	931	889	927	925
0.014	764	755	727	804	738	756	819	794	809	987	854	869	948	879
0.018	781	798	790	785	723	804	726	726	856	975	983	910	924	943
0.022	796	748	716	773	785	772	760	756	860	972	782	882	962	869
0.026	761	719	701	744	761	818	714	844	855	985	905	909	970	834
0.03	709	772	732	776	760	745	776	826	823	892	840	949	936	875
0.034	759	739	658	798	792	705	734	790	843	1007	870	895	974	910
0.038	730	767	709	738	721	753	758	840	842	969	928	934	974	912
0.042	696	740	701	794	755	682	749	793	768	949	853	885	960	888
0.046	781	772	703	773	700	814	760	771	864	933	916	929	1015	885
0.05	726	706	737	738	760	769	792	796	844	972	886	925	1020	893
0.054	760	751	760	803	731	714	745	782	811	931	941	875	962	900
0.058	721	739	675	773	724	803	746	848	847	965	899	940	949	918
0.062	731	741	762	753	756	720	756	829	913	984	862	909	1003	906
0.066	730	706	723	740	771	797	722	780	761	947	912	954	949	833
0.07	756	736	703	756	745	850	781	773	859	974	882	927	998	883
0.074	731	706	732	777	700	806	757	775	812	913	881	910	965	956
0.078	745	686	797	780	737	764	796	738	792	967	881	935	1010	863
0.082	799	770	724	722	789	724	757	796	896	978	863	898	926	899
0.086	767	790	703	732	736	760	791	723	782	955	856	935	1029	819
0.09	737	707	762	777	720	722	788	757	805	928	922	925	990	827
0.094	767	761	731	713	795	764	733	809	810	1011	896	961	919	867
0.098	816	809	731	788	779	735	806	757	827	1008	878	874	991	915
0.102	713	770	700	686	756	783	730	715	827	919	820	866	990	917
0.106	763	735	755	653	786	786	758	798	817	953	863	909	927	882
0.11	810	745	761	746	712	790	823	728	885	948	858	884	951	869
0.114	728	771	754	756	743	739	759	814	880	941	934	946	924	911
0.118	689	791	699	792	754	732	760	716	845	929	898	903	918	876
0.122	713	692	710	787	766	767	767	794	841	948	884	943	893	894
0.126	753	794	702	731	748	804	780	771	805	914	910	876	1074	862
0.13	740	765	773	789	747	759	750	779	857	1020	853	862	974	901
0.134	749	789	698	780	727	770	768	727	796	924	853	928	993	900
0.138	696	798	736	796	735	737	801	767	813	1020	916	916	911	873
0.142	792	778	678	785	806	725	781	783	865	909	975	946	982	854
0.146	687	722	740	767	771	751	776	734	895	954	897	850	926	903
0.15	704	711	696	700	785	738	830	804	840	981	930	954	960	943
0.154	741	779	733	735	766	739	758	749	852	968	886	913	990	879
0.158	692	798	705	797	755	731	722	773	835	924	838	838	962	906
0.162	808	700	735	802	762	728	857	778	755	976	887	938	1034	915
0.166	732	795	733	740	680	761	762	810	900	1019	923	950	991	919
0.17	752	793	694	742	806	808	756	768	802	923	821	966	1039	929
0.174	756	807	778	785	761	764	781	765	837	947	891	992	981	928
0.178	726	762	704	767	766	744	790	811	847	1031	828	949	1025	904
0.182	717	705	694	722	765	704	767	848	858	994	816	927	1007	878
0.186	743	770	748	803	805	727	787	803	844	965	870	952	947	838
0.19	786	737	721	823	784	794	794	833	848	961	833	965	1011	879
0.194	736	764	727	723	770	808	779	802	814	945	820	958	937	895
0.198	734	731	700	734	748	766	787	809	869	959	939	926	1004	870
0.202	751	749	777	750	773	763	807	781	859	984	893	962	983	872
0.206	797	706	730	738	771	731	803	768	832	953	875	965	996	875
0.21	753	736	758	781	770	763	807	794	794	927	901	955	973	955
0.214	767	779	739	708	780	818	736	787	878	919	931	916	1023	967
0.218	778	739	687	755	774	774	777	815	815	962	877	844	1012	893
0.222	739	761	761	756	785	793	772	789	883	951	882	858	983	980
0.226	778	727	725	721	788	764	764	762	813	935	904	1015	994	999
0.23	733	741	717	754	742	803	783	810	888	942	888	896	986	901
0.234	794	745	725	806	763	738	789	772	842	889	924	974	1049	945
0.238	693	710	728	781	740	795	766	805	843	929	916	933	1035	894
0.242	830	785	728	701	741	767	837	808	855	931	845	876	1046	905
0.246	767	700	752	754	749	750	763	786	829	992	895	991	981	888
0.25	746	749	755	781	784	717	788	793	838	943	922	980	1019	905
0.254	765	755	740	728	717	727	809	802	860	983	937	907	965	900
0.258	786	784	762	754	720	741	813	806	837	983	889	932	970	954
0.262	740	754	725	757	807	740	719	818	865	959	865	903	1019	903
0.266	793	764	690	760	737	800	744	750	880	996	884	960	915	975
0.27	744	778	697	734	783	801	787	750	804	950	893	924	1030	883
0.274	741	805	724	757	770	764	814	809	838	964	829	940	971	919
0.278	802	721	723	816	791	751	772	840	811	954	891	905	1035	942
0.282	749	766	777	765	770	764	793	775	864	959	910	967	999	937
0.286	752	724	720	731	724	776	794	795	828	911	922	915	939	900
0.29	760	753	742	759	823	788	769	815	813	1047	920	882	992	930
0.294	775	750	764	777	753	746	754	818	864	989	911	952	1020	959
0.298	778	716	736	751	784	808	817	759	846	954	952	931	943	901
0.302	712	780	762	797	779	753	764	800	768	980	947	951	1018	929
0.306	755	745	689	789	734	708	803	798	834	1002	911	960	997	890
0.31	787	729	763	776	769	775	737	805	840	899	882	986	984	917
0.314	759	743	700	759	697	737	823	782	889	974	879	976	1015	938
0.318	732	733	696	786	750	788	740	781	876	1054	894	970	1018	836
0.322	762	729	747	786	748	755	792	824	872	971	919	924	991	964
0.326	796	706	755	750	717	807	765	723	808	919	902	873	965	907
0.33	793	753	718	785	826	766	763	780	926	982	917	947	956	857
0.334	747	792	726	721	789	783	780	739	824	979	861	929	1013	880
0.338	788	735	708	798	795	790	696	838	925	991	927	976	997	878
0.342	750	780	709	763	781	724	744	866	880	1008	919	923	1006	941
0.346	804	735	715	779	713	791	699	779	863	966	872	922	995	891
0.35	756	790	738	706	787	750	770	807	869	997	916	932	961	931
0.354	827	797	763	731	789	772	807	787	834	894	882	949	950	893
0.358	777	796	711	767	784	759	796	794	879	992	892	905	991	998
0.362	752	738	759	787	747	769	791	781	865	1007	898	935	1013	931
0.366	776	735	687	727	724	799	809	815	895	1002	897	941	932	914
0.37	751	757	750	769	833	748	790	749	804	997	965	945	1010	897
0.374	761	753	692	686	737	793	818	770	811	940	873	938	1034	884
0.378	706	739	703	759	753	730	790	799	913	991	958	985	1007	866
0.382	766	751	764	762	743	736	819	768	885	997	918	976	986	876
0.386	813	769	746	829	759	728	762	792	863	954	845	877	1012	850
0.39	755	841	790	768	814	809	781	799	830	961	919	993	1018	922
0.394	793	742	685	843	750	789	760	836	868	1024	883	928	985	993
0.398	776	732	735	762	727	732	804	772	830	1005	943	919	984	940
0.402	723	718	790	794	749	769	748	846	868	998	903	962	976	866
0.406	788	739	703	756	795	744	861	746	860	1007	969	889	952	841
0.41	785	837	729	794	756	801	796	864	855	946	909	940	1027	855
0.414	714	753	753	724	767	791	770	740	890	921	890	946	995	951
0.418	750	754	724	738	759	766	787	831	831	948	893	922	995	915
0.422	769	698	692	773	734	723	817	799	839	973	975	888	962	922
0.426	753	758	809	815	754	740	822	816	859	957	883	1002	1044	851
0.43	745	784	685	768	773	766	773	848	867	944	957	940	1003	889
0.434	771	743	776	749	723	777	756	727	828	941	830	963	1033	887
0.438	775	774	758	759	771	720	777	748	896	991	825	962	984	893
0.442	778	779	719	765	719	731	804	838	804	963	856	953	998	905
0.446	772	835	699	765	790	725	791	738	873	993	910	954	972	889
0.45	772	777	730	738	779	775	738	775	840	983	931	905	982	927
0.454	715	778	747	788	756	701	740	828	895	988	832	918	1019	891
0.458	750	726	723	762	743	768	773	793	844	936	878	910	967	946
0.462	755	772	774	749	748	833	824	793	884	947	916	913	945	914
0.466	757	809	723	775	746	809	751	796	833	928	906	925	955	882
0.47	730	713	741	784	740	775	823	820	909	967	903	920	962	920
0.474	743	737	767	817	697	741	770	803	841	905	893	910	943	931
0.478	753	778	765	780	720	770	809	788	883	980	865	894	937	872
0.482	746	741	732	801	729	737	764	803	843	875	919	962	1025	861
0.486	754	734	748	814	731	712	729	802	815	912	937	999	961	973
0.49	777	741	745	826	769	808	731	762	895	920	858	926	1004	912
0.494	759	764	771	794	698	784	786	797	847	926	898	951	979	957
0.498	796	743	766	796	780	777	784	741	872	939	879	936	1001	928
0.502	741	744	804	777	807	810	772	843	800	976	953	882	994	912
0.506	715	745	831	766	769	731	810	745	939	942	879	968	896	961
0.51	790	761	752	789	731	711	747	816	847	960	905	892	1015	919
0.514	779	744	767	725	720	775	799	839	787	937	947	980	1040	921
0.518	750	842	764	756	804	790	819	800	857	967	918	975	1027	898
0.522	746	736	771	759	743	760	702	818	914	975	905	895	972	843
0.526	751	793	721	808	711	836	784	749	877	936	946	948	989	931
0.53	741	768	735	802	734	736	778	797	852	961	840	957	1025	894
0.534	762	739	744	787	701	795	764	745	861	968	884	955	970	882
0.538	780	767	714	749	773	778	776	788	887	992	917	931	1033	900
0.542	773	774	866	774	737	756	762	787	889	926	901	920	972	962
0.546	729	842	761	705	819	772	775	696	911	951	884	911	1027	878
0.55	796	763	737	789	747	784	744	804	859	922	877	1035	1009	919
0.554	741	758	775	799	735	746	792	726	862	911	934	918	933	895
0.558	808	717	768	770	735	776	852	770	923	978	848	925	993	836
0.562	811	756	781	769	738	766	801	798	815	1029	847	890	1044	847
0.566	703	777	719	746	725	747	838	758	918	984	862	1003	943	946
0.57	727	838	737	765	766	774	834	769	892	960	843	963	938	935
0.574	772	766	726	802	741	784	766	789	834	910	861	987	1002	897
0.578	763	827	725	745	736	775	837	788	854	914	884	957	963	902
0.582	795	794	795	776	753	746	795	749	844	955	892	930	1026	909
0.586	734	813	764	786	726	744	796	823	920	936	926	1013	982	843
0.59	739	763	730	727	760	747	795	763	825	925	951	938	990	854
0.594	716	807	724	766	775	755	768	770	860	913	886	905	1005	881
0.598	725	764	718	757	750	777	791	750	816	956	866	943	1018	883
0.602	770	800	741	766	810	733	772	784	899	907	839	882	935	959
0.606	800	775	722	720	724	768	776	795	805	940	892	912	958	881
0.61	757	781	711	756	729	747	785	774	885	1012	837	904	940	927
0.614	698	730	689	769	775	799	786	784	787	965	868	964	913	902
0.618	768	767	745	773	754	704	784	773	848	929	898	981	933	891
0.622	763	764	748	748	783	689	815	820	880	900	910	921	995	872
0.626	764	773	772	792	771	772	792	819	890	925	928	873	911	897
0.63	711	791	771	785	747	812	723	756	779	974	852	876	994	933
0.634	827	767	746	743	726	765	753	772	910	911	853	1026	982	862
0.638	764	781	744	727	691	730	810	785	837	917	838	962	973	963
0.642	748	745	741	739	721	786	776	744	873	924	890	1036	987	877
0.646	761	804	715	779	776	761	789	850	884	983	903	914	977	847
0.65	742	701	781	748	727	733	806	793	858	965	865	951	966	897
0.654	742	741	762	714	789	801	762	773	832	949	930	932	988	905
0.658	838	790	726	741	771	731	857	801	920	951	901	882	937	933
0.662	782	730	752	761	752	779	805	772	919	987	922	951	957	892
0.666	765	788	682	755	760	717	838	787	850	940	902	887	942	956
0.67	778	765	749	790	802	703	773	811	903	915	831	936	957	847
0.674	779	746	731	772	722	742	786	779	910	992	875	990	1003	929
0.678	771	706	795	793	811	806	766	741	827	896	892	910	979	870
0.682	771	792	759	784	742	775	764	805	820	908	905	940	1032	941
0.686	747	730	749	777	753	776	747	816	878	950	873	945	941	892
0.69	752	805	756	793	810	733	709	797	839	913	944	878	914	895
0.694	685	790	755	770	764	778	705	821	855	894	945	937	980	902
0.698	762	754	765	749	771	741	799	787	824	955	910	872	920	851
0.702	749	716	702	775	814	798	773	813	902	1009	790	917	1011	886
0.706	736	756	694	746	746	788	811	759	881	938	847	972	977	888
0.71	691	749	750	755	757	756	816	773	843	901	879	996	974	898
0.714	757	801	757	745	756	715	760	804	910	982	887	947	1005	894
0.718	833	792	799	806	776	786	773	803	835	974	889	957	930	888
0.722	744	828	773	774	787	724	793	751	825	968	886	932	955	877
0.726	762	796	724	798	759	773	764	823	847	902	869	868	966	871
0.73	763	747	739	789	755	799	790	791	853	995	838	952	954	868
0.734	795	764	758	723	766	782	776	813	884	966	890	889	945	912
0.738	796	783	815	768	778	796	739	817	897	1013	895	929	899	900
0.742	755	804	723	751	782	822	733	781	867	872	936	927	949	859
0.746	810	722	754	707	769	749	771	813	900	1026	898	931	955	950
0.75	782	777	737	776	792	724	814	841	904	943	855	904	1009	909
0.754	689	796	747	794	752	736	757	795	893	985	866	1004	936	921
0.758	786	699	759	710	677	829	826	743	809	986	854	881	969	873
0.762	758	804	769	807	745	762	718	747	858	924	850	935	959	859
0.766	707	747	725	786	781	755	756	798	918	934	905	946	971	859
0.77	764	807	717	782	802	757	785	786	874	1045	865	918	946	868
0.774	680	727	734	782	709	731	767	760	823	985	875	973	960	891
0.779	732	732	764	788	833	816	843	776	897	961	927	1006	982	881
0.783	766	757	728	730	737	710	780	833	901	987	897	884	936	904
0.786	753	797	784	788	752	711	818	784	819	947	900	823	982	950
0.79	756	739	692	765	730	752	766	831	895	892	851	947	961	900
0.794	712	756	779	789	725	714	831	854	842	907	817	908	997	944
0.798	767	751	755	768	794	782	745	739	791	897	882	877	996	877
0.802	722	805	771	697	710	719	748	812	850	997	901	892	912	912
0.806	803	746	719	754	714	727	776	746	880	890	852	975	1013	933
0.81	740	737	737	754	701	790	795	835	942	992	850	909	987	901
0.815	722	714	780	771	737	764	736	711	847	903	921	899	1001	871
0.818	741	780	754	807	708	787	813	753	896	954	927	913	1014	910
0.822	699	824	743	766	762	761	778	785	890	981	864	955	932	890
0.826	756	802	756	756	787	755	742	817	851	1003	863	913	950	839
0.83	741	766	785	764	751	788	793	776	863	915	918	874	935	888
0.834	768	762	800	783	685	724	791	761	861	962	871	965	992	886
0.838	737	750	722	730	790	743	758	772	849	938	866	905	973	877
0.842	762	796	730	758	730	760	840	777	832	953	893	928	942	858
0.846	714	723	783	770	780	839	765	852	859	947	898	956	876	901
0.851	742	693	757	799	787	705	791	824	892	942	925	949	954	829
0.854	744	738	763	798	756	745	810	791	903	927	886	924	962	915
0.859	675	755	771	749	761	771	791	845	862	975	890	946	938	949
0.862	781	733	792	753	693	764	778	739	804	969	911	933	990	896
0.866	725	758	749	774	755	782	794	728	850	960	943	843	942	945
0.87	747	780	738	761	723	756	746	800	895	921	867	905	956	876
0.874	695	744	803	818	717	746	764	800	861	914	931	885	941	934
0.878	798	756	780	775	718	750	862	829	850	920	893	884	1018	915
0.882	771	767	731	740	785	734	739	723	816	908	824	915	1001	902
0.887	705	814	790	795	753	729	763	769	887	868	866	923	894	888
0.891	737	748	758	766	730	799	764	810	898	987	827	889	924	919
0.895	782	714	752	704	728	709	766	790	896	925	889	921	948	915
0.898	752	824	783	749	742	775	768	808	866	937	832	940	965	911
0.902	742	746	748	705	716	795	794	751	859	975	921	896	979	877
0.906	750	806	751	794	752	756	764	774	871	973	888	921	930	905
0.91	738	740	779	699	791	769	766	791	889	921	893	907	989	876
0.914	763	796	784	788	784	812	779	817	879	931	917	917	986	898
0.919	745	754	731	797	723	783	710	801	835	924	875	907	912	870
0.923	720	735	752	801	770	758	747	803	822	953	900	914	947	892
0.927	746	720	732	743	727	746	684	805	897	946	908	931	988	874
0.93	712	704	771	772	733	785	752	814	869	959	938	877	944	833
0.934	762	698	779	805	705	744	778	801	922	980	897	946	965	880
0.938	733	736	733	724	750	793	740	742	892	961	876	920	933	870
0.942	763	727	751	761	754	727	824	795	847	934	907	933	1055	938
0.946	740	736	713	761	786	763	783	805	907	902	854	864	960	880
0.951	773	755	767	743	730	735	787	802	847	913	884	863	979	959
0.955	769	734	732	735	761	732	728	807	879	936	861	952	887	936
0.959	777	759	739	740	779	724	740	805	843	938	822	979	931	931
0.963	728	709	764	711	734	736	799	721	861	956	846	955	963	986
0.967	753	809	793	809	763	764	795	783	950	974	863	938	927	886
0.97	697	799	795	813	810	743	773	744	868	918	892	852	879	883
0.974	733	767	756	762	737	743	816	833	861	929	891	923	989	858
0.978	729	761	807	789	747	777	795	800	883	904	914	908	1036	896
0.982	774	736	725	738	746	678	740	749	881	914	863	963	951	901
0.987	742	826	729	804	753	798	779	785	873	987	838	912	871	923
0.991	744	732	735	784	775	722	812	780	867	939	864	967	950	945
0.995	801	755	720	772	748	775	756	826	880	939	839	883	922	934
0.999	780	723	821	808	718	679	771	850	886	949	788	967	904	893
1.003	734	802	797	786	798	773	797	781	865	928	923	856	906	905
1.007	806	799	751	764	749	736	759	815	908	892	873	875	1006	892
1.01	745	748	733	767	747	756	736	815	861	991	885	934	895	898
1.014	707	797	772	783	711	770	776	698	918	964	858	911	977	886
1.018	806	777	762	800	759	734	783	826	910	962	881	880	988	832
1.023	803	715	777	750	696	784	711	766	872	952	882	967	951	918
1.027	778	693	757	782	761	744	743	781	817	973	823	900	889	872
1.031	786	744	761	748	741	786	745	774	900	850	854	937	946	881
1.035	757	798	711	781	785	754	732	806	889	918	924	899	995	935
1.039	794	758	745	783	767	737	802	790	890	834	861	884	908	897
1.043	788	761	759	747	728	750	816	788	889	880	877	927	875	934
1.046	776	703	721	802	749	706	799	774	898	963	838	925	944	907
1.051	773	804	772	779	752	775	720	708	829	962	866	927	930	942
1.055	789	741	697	769	734	748	767	821	865	920	914	901	977	906
1.059	763	767	769	774	748	749	804	777	843	966	878	924	989	900
1.063	763	762	786	733	739	810	809	759	937	937	910	912	928	896
1.067	763	770	766	725	786	794	785	836	920	1004	881	876	977	902
1.071	725	718	779	764	735	817	766	770	844	905	833	891	985	866
1.075	796	743	774	749	756	779	769	812	900	943	913	940	985	884
1.079	731	751	709	813	772	830	729	784	854	937	850	890	980	893
1.083	789	758	726	812	787	765	769	802	825	978	881	889	944	883
1.087	750	759	732	719	783	775	780	804	826	939	900	897	947	897
1.091	789	784	773	763	745	810	763	782	856	974	822	900	989	886
1.095	769	725	725	760	766	730	756	781	839	973	853	939	969	898
1.099	754	765	766	769	740	738	774	774	917	897	886	945	902	921
1.103	740	759	782	809	712	704	771	802	876	875	832	941	943	883
1.107	777	756	699	763	748	734	853	775	889	943	869	862	932	892
1.111	798	748	765	764	724	759	753	831	883	934	937	862	934	900
1.115	729	766	749	753	722	762	770	839	886	994	859	932	981	886
1.119	753	760	775	773	729	734	810	858	928	937	805	904	966	893
1.123	812	787	782	728	719	790	781	842	877	935	914	864	887	924
1.127	747	746	717	755	716	756	782	789	872	953	866	889	933	910
1.131	737	746	726	758	774	738	720	795	862	936	925	925	933	839
1.135	768	741	717	753	763	762	723	761	913	922	869	879	938	906
1.139	725	717	714	781	722	725	767	815	879	952	839	891	929	886
1.143	743	701	743	759	752	733	709	828	868	921	852	914	944	824
1.147	743	786	786	705	714	759	737	794	787	882	891	947	837	942
1.151	779	711	719	763	739	776	786	804	825	998	855	866	938	892
1.155	781	814	733	748	703	771	814	797	855	893	894	935	942	904
1.159	755	722	742	784	709	790	719	779	868	995	858	885	965	927
1.163	685	757	746	771	713	720	785	803	877	960	861	851	944	906
1.167	695	736	789	748	756	725	775	786	933	868	927	913	933	872
1.171	725	754	704	742	757	681	770	792	895	964	889	921	970	904
1.175	795	798	746	701	764	713	733	824	888	985	907	916	1008	822
1.179	761	708	717	754	721	786	750	844	854	913	877	880	1006	885
1.183	762	749	771	770	761	718	757	811	870	997	882	935	877	855
1.187	784	746	790	766	716	726	760	760	800	835	788	935	902	892
1.191	748	745	718	776	753	743	754	780	881	895	848	876	957	896
1.195	750	706	711	698	729	785	772	768	861	900	842	883	950	923
1.199	723	775	708	750	745	741	702	745	874	925	879	919	937	863
1.203	772	738	737	803	697	769	795	805	912	966	837	883	953	910
1.207	785	781	771	743	768	699	778	797	887	916	808	941	954	919
1.211	739	779	736	761	722	793	786	799	835	941	856	899	884	882
1.215	782	756	755	809	741	744	791	801	860	911	912	898	946	858
1.219	770	737	738	772	709	766	813	773	935	905	784	901	961	895
1.223	703	802	722	726	769	756	693	777	830	921	885	984	932	901
1.227	790	757	741	787	769	755	723	751	882	934	803	838	995	915
1.231	791	732	731	731	746	779	756	784	816	946	828	888	953	948
1.235	761	777	765	726	751	764	756	759	926	987	910	919	861	843
1.239	768	786	747	735	763	791	747	786	865	964	892	852	909	920
1.243	743	742	717	742	764	760	768	781	952	942	856	877	935	837
1.247	753	790	736	754	749	795	769	748	880	954	883	885	1003	860
1.251	748	767	703	760	723	765	713	774	867	982	902	956	946	897
1.255	859	759	847	722	748	872	779	779	863	1109	907	841	979	905
1.259	902	1061	1293	815	768	1283	821	814	939	1331	1186	907	924	939
1.263	1261	1430	2312	1150	928	1910	1009	817	962	1774	1463	1039	1082	1046
1.267	1549	1833	5275	2028	1291	2519	1535	1071	1336	1953	1813	1310	1443	2192
1.271	1729	1951	6191	3347	2067	2745	2061	1585	1848	2135	1944	1900	1978	9179
1.275	1837	2373	7501	7267	2934	2966	2939	2490	2292	2831	2147	2660	2576	18065
1.279	2594	3614	10142	9411	5858	5552	5458	5886	3236	5955	2812	6110	3651	28372
1.283	3890	5829	11176	11935	7440	6853	7129	8238	7057	6459	6401	8562	6965	33082
1.287	4995	5570	9212	12445	7118	6451	6604	8536	8113	5090	7219	9090	7509	27965
1.291	4926	4692	5807	9921	5574	4826	3982	6598	6593	4074	5784	7489	4881	17783
1.295	3794	3521	3952	5875	3675	3063	3073	3786	4208	3221	3324	3363	3679	8567
1.299	3029	2942	3009	2956	2973	2331	2713	3067	2973	2615	2526	1919	2763	3494
1.303	2532	2523	2381	2579	2839	2284	2744	2722	2638	2241	2225	1509	2592	2734
1.307	2263	2252	2246	2635	2537	2316	2503	2490	2466	2072	2275	1476	2356	2618
1.311	2058	1971	2117	2347	2300	2215	2273	2423	2232	2042	2153	1384	2162	2466
1.315	1928	1846	1862	2163	2134	3786	2094	2094	1995	1998	2001	1441	1950	2046
1.319	1814	1954	1769	1637	2021	59174	2783	1972	1869	2061	1693	1376	2057	2021
1.323	1868	2178	1626	1393	1828	172645	12710	1817	2180	2286	1554	1293	1786	1988
1.327	1968	2408	1672	1267	1847	270947	22106	1991	3598	2530	1532	1225	1866	1818
1.331	2017	2567	1662	1268	1751	304391	203384	2821	6682	2503	1505	1165	1821	1945
1.335	1937	2427	1589	1097	1825	324320	32352	4568	9190	2788	1346	1067	1932	1990
1.339	2047	2757	1643	1229	1834	362113	34269	17069	11029	3422	1282	1113	2074	2115
1.343	2407	3409	1794	1490	2090	389384	35635	41875	50695	4509	1348	1133	2261	2420
1.347	2923	3860	2165	2230	2176	389704	34761	55739	17532	5065	1748	1228	2529	2805
1.351	3274	3364	2101	2518	2250	354655	241297	48090	16911	4119	1802	1622	2426	2761
1.355	2626	2578	1547	2167	1943	290699	23852	26834	40610	3027	1541	1819	2227	2433
1.359	2181	2092	1107	1662	1728	181155	16496	4858	7009	2188	1160	1627	1721	1940
1.363	1744	1604	892	1054	1468	74350	7006	2235	3458	1925	932	1412	1418	1758
1.367	1722	1538	759	863	1362	22763	3286	1292	2067	1791	827	1115	1211	1649
1.371	1540	1392	652	758	1235	4023	2654	948	1760	1552	777	997	1006	1663
1.375	1551	1311	648	735	1143	2780	2307	873	1650	1249	807	1051	968	1498
1.379	1563	1290	654	717	951	2518	2250	863	1500	1811	809	980	948	1324
1.383	2734	5259	71893	663	870	36701	2424	800	1334	51103	746	975	867	1199
1.387	81173	133097	246810	804	1560	170556	9989	737	1720	165602	770	978	1220	1211
1.391	217218	263275	385530	102497	93000	313055	200268	761	40696	257534	786	897	42951	59332
1.395	299974	315318	442918	272380	260475	366166	352397	2040	130583	283842	750	950	138536	222695
1.399	300886	318604	780188	387770	576658	380063	409219	27565	201301	279496	945	933	208644	365335
1.403	270374	35872	40224	40326	591151	60977	40600	63720	220380	283909	1471	1005	246915	609141
1.407	252273	56495	438072	155171	429628	63950	40480	117455	227527	319430	1803	938	284715	700580
1.411	283920	367775	461436	481850	460771	440537	422168	156049	261195	371716	2791	954	317187	40950
1.415	344072	397159	671629	754899	471178	435692	436441	169292	302852	391734	4509	3792	325259	162069
1.419	369989	379996	607727	705795	427355	381571	428882	146442	307249	358284	8428	12301	291656	41386
1.423	520328	317326	521742	369791	394015	295288	379513	95518	263248	286554	4767	14269	224284	40244
1.427	354047	229148	351048	267898	298455	181413	293796	45540	181342	178078	3409	11682	127097	435505
1.431	177035	126084	126304	137872	176155	84119	184551	21713	98838	85294	2349	5187	54435	187358
1.435	80881	48146	45108	51807	74442	31920	90090	10456	35974	32133	1664	3666	23114	73417
1.439	31766	20473	20879	23327	29015	16165	33145	2946	15346	14141	1362	2620	10564	29653
1.443	14565	4906	12982	13789	14495	10878	15626	1977	3935	4238	1069	2092	3512	14737
1.447	3917	3634	4772	10236	4813	4703	5013	1565	2850	3238	967	1705	2599	5118
1.451	2940	2732	3663	4888	3737	4125	3978	1330	2186	2702	860	1537	2161	3971
1.455	2488	2397	3112	4138	3169	3478	3314	1143	1766	2377	776	1433	1881	3384
1.459	2134	2045	2792	3521	2715	3122	2860	1033	1663	2076	807	1312	1514	3037
1.463	1880	1795	2565	3187	2346	2846	2532	972	1526	1892	750	1253	1415	2610
1.467	1751	1661	2378	2756	2139	2561	2167	885	1498	1733	777	1191	1399	2267
1.471	1569	1486	2062	2540	1925	2357	2192	954	1393	1727	769	1139	1230	2092
1.475	1413	1356	1891	2382	1667	2241	1972	1600	1670	2097	793	1158	1210	1781
1.479	1327	1302	1830	2092	1595	2160	2063	4937	3800	3549	832	1166	1176	1805
1.483	1144	1203	1743	2100	1524	2186	1923	15472	13933	5081	893	1104	1190	1636
1.487	1166	1180	1598	1971	1426	2192	2071	17238	17912	5507	919	1203	1078	1585
1.491	1130	1178	1553	1793	1367	2212	1887	14823	16584	4829	990	1106	1171	1550
1.495	1121	1121	1514	1746	1318	2376	2288	5842	12652	3624	1115	1147	1088	1526
1.499	1074	1038	1439	1643	1274	3231	4004	3570	4499	2517	1055	1182	1085	1369
1.503	966	983	1386	1569	1174	6230	12084	2503	2719	1862	982	1145	982	1360
1.507	919	967	1213	1407	1063	14204	16781	1533	1954	1485	886	1174	978	1263
1.511	855	941	1170	1418	1047	14464	14820	1187	1603	1289	807	1118	943	1214
1.515	874	864	1203	1332	1084	10728	5744	1021	1293	1235	789	1017	859	1211
1.519	828	891	1117	1237	919	3860	2793	943	1088	1132	734	1088	856	1162
1.523	836	814	1069	1175	956	2001	1511	858	1005	1067	777	1024	867	1097
1.527	724	851	963	1167	895	1451	1192	806	927	1025	711	942	859	1050
1.531	774	785	953	1179	850	1251	1104	718	893	1054	749	965	836	1089
1.535	755	697	930	1098	840	1145	1072	766	1044	926	658	997	796	1090
1.539	684	765	914	1057	847	1178	1078	801	1226	988	691	1017	767	965
1.543	727	739	895	1058	857	1168	947	732	1254	931	698	1060	802	974
1.547	745	798	926	1081	835	1119	1025	813	1301	1015	729	994	764	967
1.551	710	728	950	1046	849	1147	931	719	1070	1154	653	965	716	1061
1.555	717	832	944	1095	796	1034	958	685	961	1464	703	978	920	984
1.559	779	814	901	1056	867	1078	1051	720	861	1767	723	949	1026	1072
1.563	728	850	870	1169	869	1028	1122	1091	985	2157	739	987	1216	1203
1.567	765	919	1005	1098	883	1053	1104	2036	1448	3180	783	993	1639	1337
1.571	893	963	897	1106	780	1073	1080	3138	2302	4566	736	979	1943	1240
1.575	876	972	890	1078	868	982	1036	3305	2774	4504	685	945	1900	1159
1.579	796	901	877	957	800	985	981	2805	2530	3505	729	942	1726	1017
1.583	752	839	760	913	767	960	944	2046	2120	2503	691	997	1401	935
1.587	724	754	819	895	693	960	943	1441	1755	1801	697	1095	1172	846
1.591	700	667	787	885	731	920	967	1107	1782	1423	764	1321	1031	845
1.595	635	743	802	877	716	928	911	904	1979	1194	775	1586	922	841
1.599	636	609	771	851	681	911	839	858	1944	1053	777	1681	844	853
1.603	598	674	713	827	707	904	875	767	1595	1044	785	1488	859	815
1.607	612	657	701	771	716	806	793	788	1204	956	731	1241	749	771
1.611	591	601	687	804	691	844	869	852	1032	926	676	1037	721	841
1.615	618	615	680	765	708	821	805	840	915	992	709	1000	798	752
1.619	620	644	652	813	671	851	813	746	934	942	684	1023	729	851
1.623	578	600	654	791	678	810	818	736	929	855	698	1005	708	763
1.627	598	601	692	838	718	809	811	718	791	826	682	955	757	736
1.631	575	608	675	760	655	815	727	638	716	767	675	961	760	757
1.635	564	554	704	801	622	736	713	677	679	795	637	929	754	797
1.639	601	603	638	726	667	814	745	754	675	736	696	893	750	763
1.643	577	615	703	773	643	847	714	661	665	789	686	953	818	767
1.647	604	588	687	774	699	805	768	665	726	797	729	950	795	750
1.651	552	634	645	719	639	778	734	611	689	847	682	977	774	795
1.655	628	708	657	753	707	819	762	614	730	925	660	859	698	734
1.659	629	740	777	781	699	850	807	598	716	867	661	880	692	746
1.663	632	845	867	725	802	909	889	673	808	878	814	962	732	784
1.667	690	836	998	1112	854	1055	1030	668	797	914	869	919	729	1081
1.671	770	949	1273	1440	1181	1214	1214	747	798	900	1027	939	812	1515
1.675	964	1126	1381	1615	1215	1400	1397	858	961	1047	1196	879	922	1708
1.679	977	1179	1209	1535	1255	1426	1359	1048	999	1113	1466	909	1036	1555
1.683	930	1030	1094	1348	1115	1406	1213	1046	1009	1068	1530	956	1025	1380
1.687	896	873	942	1206	986	1137	1163	896	989	986	1255	919	1011	1194
1.691	839	778	844	1188	906	1116	1074	855	984	898	1099	899	924	1104
1.695	763	746	860	962	816	1066	968	818	967	939	1037	967	862	975
1.699	750	739	815	984	762	928	947	937	1109	979	936	948	856	984
1.703	682	713	700	888	820	844	924	880	969	949	900	1057	901	928
1.707	706	667	735	944	759	842	830	857	956	853	891	1013	848	823
1.711	610	637	660	873	697	820	847	733	888	870	803	1053	715	893
1.715	661	591	641	820	641	775	790	746	850	921	803	1014	715	799
1.719	617	588	619	805	632	780	738	758	867	829	778	1076	742	777
1.723	566	535	628	743	663	769	791	728	831	780	741	952	778	774
1.727	547	558	672	717	648	736	769	632	855	812	769	952	700	740
1.731	611	633	606	759	615	739	745	582	706	767	750	926	706	758
1.735	588	572	634	691	639	724	754	595	665	713	746	958	669	777
1.739	613	580	616	700	573	682	729	606	652	755	776	933	707	758
1.743	596	560	579	695	619	736	725	586	654	717	699	929	718	712
1.747	565	600	556	711	573	737	702	529	635	665	628	942	641	692
1.751	556	564	549	666	560	695	721	561	643	757	696	916	689	674
1.755	581	580	584	655	566	746	693	555	616	738	720	898	748	694
1.759	543	548	562	703	625	706	665	616	657	731	707	959	731	704
1.763	510	565	579	749	601	701	635	639	671	630	710	880	726	783
1.767	582	601	677	696	605	2968	697	606	730	742	661	918	785	727
1.771	607	632	619	735	588	4556	702	586	655	764	610	923	757	712
1.775	542	613	575	697	661	5764	725	627	777	748	733	916	700	670
1.779	576	578	602	665	606	9401	725	1686	734	938	713	954	729	696
1.783	620	565	584	1157	590	4440	752	4043	1436	1716	705	930	3108	676
1.787	586	576	598	1117	666	2935	718	5246	4295	2863	736	906	4750	719
1.791	600	1453	625	1117	699	2307	745	10134	18725	3952	713	893	6082	664
1.795	607	3439	595	1158	3091	2103	747	11647	33705	5427	693	951	11507	764
1.799	614	4412	617	1138	4375	1901	775	12892	52648	16627	635	902	13514	705
1.803	2565	5459	627	1186	5796	1829	799	14776	71991	22083	743	935	15168	789
1.807	3596	10091	579	1206	10039	1681	2314	20077	82986	23146	703	945	17044	818
1.811	4539	11456	633	1141	11636	1662	3774	24840	72805	25154	718	940	21294	931
1.815	5183	12757	620	1144	13344	1566	4785	26801	54223	21425	781	932	25129	922
1.819	6215	14523	580	1137	15178	1568	5703	28825	37076	20299	774	949	27825	878
1.823	11116	16587	602	1106	19153	1556	9912	30621	26243	16829	712	913	29763	839
1.827	12242	21591	626	1108	21825	1551	11978	33325	24723	23971	730	970	32419	776
1.831	14031	22886	538	1074	13391	1479	13159	36551	25751	26404	715	883	35180	748
1.835	15652	27695	580	1093	14154	1397	14496	38524	26298	28666	756	878	37773	1069
1.839	19767	29805	622	1007	31637	1311	16109	41715	27335	31517	753	915	41103	1083
1.843	21570	32831	702	1008	33699	1343	19902	44837	29881	34058	805	990	42849	1233
1.847	26420	35415	694	1091	36402	1213	24726	47436	31802	36587	756	873	43555	1153
1.851	29279	37086	765	1007	38449	1217	26945	50521	32983	39444	865	884	47349	1277
1.855	31193	39995	812	1026	41154	1187	29150	53656	34468	40618	814	1045	50703	1189
1.859	33703	42449	729	1023	44809	1184	30627	57726	37124	43783	816	989	53334	1166
1.863	36279	45076	788	1002	47623	1162	32865	59663	38857	48003	773	1060	57621	1134
1.867	38483	47431	717	995	49605	1096	35113	62872	40424	50424	816	1033	59456	1102
1.871	41590	50073	724	952	52784	1078	37760	65570	42348	53640	728	980	60773	1018
1.875	44223	52877	708	929	57089	1028	40147	68212	44885	58301	806	998	65701	1098
1.879	46654	55537	706	959	59222	1075	43162	72159	46569	62085	769	940	70591	1003
1.883	48669	57563	725	900	62052	1053	45690	76982	49230	64269	746	985	73260	977
1.887	52341	61502	745	926	64997	1014	48215	80463	52619	66609	745	943	75214	961
1.891	55775	65544	665	834	68495	1037	51212	82340	55779	70901	729	899	79240	1029
1.895	57250	69437	704	865	73578	1016	53150	84952	58373	75409	784	906	85095	982
1.899	60578	73742	697	880	76629	956	56342	89209	60194	80262	726	917	90366	947
1.903	64839	79029	681	902	78985	965	59977	92577	64292	87968	707	876	96365	954
1.907	66325	91987	707	837	81407	971	63063	98191	76084	116756	703	917	104401	935
1.911	73588	144829	702	918	86795	961	66226	104258	137186	217126	714	890	125013	969
1.915	94931	193340	663	850	91403	1041	67555	109539	353200	349734	762	862	164361	931
1.919	142784	417480	707	897	95187	1325	70838	116001	553784	457402	771	919	413895	939
1.923	138774	511994	803	950	99516	2161	77599	135927	535734	523365	730	867	578136	1002
1.927	144106	567757	1171	1359	107622	2955	84845	185455	179099	572432	690	861	653224	1410
1.931	368377	610302	1585	2448	115703	3834	91371	258292	790165	608579	758	863	332170	3593
1.935	423502	549385	2178	4381	125845	5380	101765	302495	291449	634185	732	881	331843	7019
1.939	472538	308261	2841	6063	135736	6596	106769	307403	296150	620463	757	883	278877	13452
1.943	449187	499193	2928	6566	135082	6234	105782	274921	319922	555828	738	905	666227	12678
1.947	369602	488776	2665	5469	134475	5107	104616	217210	419552	435136	751	832	584360	6550
1.951	257211	350814	2075	3892	135362	3697	105512	181844	198308	301335	799	974	457617	4477
1.955	179857	219597	1399	2605	137670	2410	106688	168425	552249	198841	759	875	301677	2876
1.959	140381	164348	1251	1960	139700	1789	109141	161722	356792	164270	845	932	208916	1983
1.963	130293	145987	1002	1503	142465	1379	112951	163766	203977	157878	837	906	183364	1529
1.967	129407	144202	885	1211	146415	1226	119518	167137	175044	160307	868	893	183800	1272
1.971	131480	147699	773	1095	151498	1171	122514	102617	170621	162383	888	940	181157	1169
1.975	133836	150998	750	977	157652	1034	122963	34051	172042	167237	807	1026	182078	1077
1.979	138154	155536	692	901	160283	1036	125042	178412	173674	169490	844	1073	186428	1041
1.983	143529	159398	685	954	164933	983	132435	181329	174276	173923	810	1099	189071	1013
1.987	145740	165546	758	910	170478	968	139269	184726	176640	181252	803	1110	195412	1046
1.991	148698	169715	690	787	175556	875	143987	194500	179145	185867	805	1026	198259	948
1.995	151586	172860	624	880	179669	929	149488	198464	182545	185301	771	1145	200991	933
1.999	156913	177825	674	824	183923	906	152305	202474	184192	187979	731	1023	201724	974
2.003	164384	183080	653	809	187610	991	155875	206973	190207	189534	751	980	210242	880
2.007	169208	185685	691	871	192238	829	162969	212080	191918	193376	759	1018	215912	915
2.011	168940	188477	767	820	200189	937	169278	215613	192938	196974	724	983	220468	917
2.015	173857	193180	1687	839	196390	1711	171997	218220	197642	120485	775	987	222638	876
2.019	181022	202738	4946	1697	206574	3515	175432	220776	200148	23894	728	991	225425	1015
2.023	184958	205403	9527	5550	215693	5610	179846	228935	206811	13405	717	1046	233043	2177
2.027	190344	213769	20466	17647	224343	7399	189581	236531	212256	10796	763	1014	239182	7338
2.031	196603	217362	40367	38282	233075	9447	192738	246349	218391	6659	700	935	245880	22815
2.035	202467	225634	56694	56156	246788	11565	200276	256302	225161	6249	782	1006	256512	45900
2.039	221314	235335	56495	59182	257508	15558	208830	278986	228935	6443	745	993	265846	49092
2.043	232905	242578	40126	46189	265938	10368	214589	287893	232324	6174	748	964	269950	37076
2.047	223568	241649	20162	29100	256933	7682	218006	276986	239312	5901	715	982	272171	19310
2.051	235529	240486	9032	11239	257188	5313	224882	270919	241019	5303	683	966	271251	8671
2.055	234017	239646	5550	6889	255673	3697	224922	272136	242928	4694	825	996	274580	5287
2.059	231681	244233	3589	4198	257064	2422	223300	268589	244669	4034	862	948	272280	3492
2.063	231653	247824	2503	2952	257383	1811	227977	263383	248029	3718	827	999	269272	2358
2.067	233405	249177	1942	2195	260072	1568	231607	146036	248997	3492	866	938	277749	1846
2.071	235694	253446	1660	1971	232300	1316	233827	28631	251511	3303	788	908	282561	1665
2.075	235528	258633	1481	1709	116831	1249	235088	15015	257386	3244	750	885	285244	1446
2.079	240121	259880	1373	1613	23567	1174	237179	12140	260336	2969	812	1000	287204	1382
2.083	244720	264181	1154	1459	14083	927	239270	10211	265385	2900	856	950	293418	1210
2.087	245038	269826	1088	1259	11427	1033	243824	6796	267889	2708	785	911	295972	1242
2.091	248488	272490	1040	1239	9519	996	245453	5944	273351	2673	781	948	295133	1190
2.095	252108	265242	991	1263	6510	994	248129	5300	268118	2613	792	929	184205	1096
2.099	255980	148257	975	1150	5724	929	254236	4972	280700	2537	794	892	39260	1090
2.103	258257	29476	994	1119	5175	1013	180082	4645	284660	2439	685	897	19724	973
2.107	262612	14892	824	1079	4791	962	63369	4204	291826	2397	764	859	13410	1001
2.111	265719	11944	898	1024	4551	933	19889	4091	296455	2305	736	866	11217	956
2.115	270232	7047	869	1049	4162	850	12816	3674	296988	2352	740	943	6667	949
2.119	169875	6146	735	987	3886	907	10361	3646	298678	2314	743	920	6142	944
2.123	37766	5608	834	1035	3724	905	6673	3499	136167	2149	718	975	5641	985
2.127	16254	5173	753	977	3522	790	5921	3352	50008	2062	781	840	5020	989
2.131	12350	4563	778	891	3413	854	5387	3192	21497	2038	735	899	4861	882
2.135	10142	4463	732	892	3230	840	4987	2994	13686	2034	693	945	4449	863
2.139	6318	4168	782	942	3172	951	4510	2913	11425	2107	648	905	4276	883
2.143	5660	4007	785	893	3039	796	4326	2826	10040	2045	710	943	4097	959
2.147	5231	3726	790	955	2921	871	3893	2734	6253	1949	709	895	3719	866
2.151	4837	3407	761	870	2753	853	3851	2656	5423	1933	721	951	3737	1001
2.155	4583	3530	832	922	2722	887	3651	2578	5259	1946	723	883	3595	1025
2.159	4187	3453	817	909	2717	847	3434	2535	4893	1983	720	918	3469	1024
2.163	3922	3221	820	962	2629	846	3280	2424	4487	1875	692	887	3426	1074
2.167	3734	3149	768	917	2601	841	3113	2411	4251	1799	755	908	3290	1054
2.171	3638	3009	784	931	2621	866	2991	2380	4130	1734	701	870	3160	972
2.175	3389	2881	706	833	2438	840	2991	2244	4030	1753	682	909	3094	974
2.179	3237	2852	633	861	2400	846	2806	2220	3691	1671	735	951	3050	933
2.183	3127	2865	736	926	2323	774	2785	2064	3519	1747	758	889	2849	888
2.187	2967	2711	702	799	2332	748	2745	2177	3409	1671	762	916	2843	961
2.191	2848	2635	726	777	2188	832	2750	2114	3350	1616	667	903	2720	879
2.195	2742	2428	732	783	2156	818	2577	2170	3191	1682	755	868	2647	887
2.199	2724	2400	695	798	2177	833	2477	2059	2966	1617	724	917	2510	897
2.203	2641	2408	710	817	2149	808	2501	2055	3106	1676	716	919	2522	833
2.207	2538	2348	701	831	2041	785	2403	2038	2929	1576	751	908	2530	828
2.211	2562	2262	683	881	2026	763	2361	1912	2927	1759	709	972	2486	831
2.215	2491	2268	689	787	2040	790	2220	1918	2852	1640	722	902	2427	843
2.219	2387	2161	673	795	2005	816	2196	1877	2949	1623	742	906	2390	896
2.223	2395	2177	729	834	2027	820	2264	1832	3024	1629	745	929	2386	809
2.227	2288	2219	673	842	2017	777	2120	1851	2929	1699	710	932	2305	834
2.231	2332	2230	689	782	1971	915	2081	1842	2989	1631	740	893	2356	792
2.235	2178	2168	628	761	1883	807	2205	1853	2779	1607	745	841	2382	821
2.239	2231	2098	638	788	1900	858	2278	1853	2705	1581	679	869	2219	809
2.243	2095	1974	644	796	1893	1134	2578	1760	2690	1495	719	906	2214	767
2.247	2018	1968	677	755	1850	1313	2677	1741	2606	1540	702	913	2152	842
2.251	2022	1881	677	810	1937	1404	2584	1781	2571	1527	723	906	2139	748
2.255	2017	1996	614	777	1739	1423	2443	1887	2506	1546	662	923	2113	802
2.259	1929	1805	702	746	1845	1441	2378	1810	2473	1748	775	884	1987	830
2.263	1907	1898	667	758	1744	1396	2289	1854	2391	1981	745	953	1997	811
2.267	1859	1888	645	777	1710	1580	2207	1926	2518	2433	911	885	1955	874
2.271	1964	1828	654	750	1735	1584	2090	2286	2741	2986	2669	1015	2007	849
2.275	1869	1767	609	771	1681	1731	2004	3235	3291	3631	6683	953	1953	858
2.279	1884	1791	702	845	1690	1831	2100	4879	4100	4800	13834	933	2042	823
2.283	1780	1737	697	872	1691	2107	2076	6408	4859	5535	19815	893	1949	870
2.287	1711	1705	752	825	1675	2164	2047	6607	5410	5708	21126	872	1829	886
2.291	1801	1664	741	801	1680	2103	2142	5932	5443	5023	17991	916	1824	925
2.295	1766	1628	695	884	1546	1897	2181	4563	4628	3802	11481	922	1853	932
2.299	1777	1708	687	919	1639	1510	1988	3332	3633	3025	7553	853	1889	915
2.303	1801	1697	736	833	1543	1356	1927	2512	3009	2299	5058	882	1831	853
2.307	1680	1657	677	853	1658	1083	1914	2257	2832	2248	3383	883	1852	894
2.311	1703	1511	684	714	1839	971	1869	2259	3413	2225	2487	915	1791	820
2.315	1701	1644	673	802	2048	935	2090	2652	4178	2417	1949	917	1770	839
2.319	1595	1506	671	746	2450	839	2267	3289	5431	2633	1600	875	1800	749
2.323	1633	1587	683	721	2583	854	2327	3627	6165	2583	1467	937	1757	869
2.327	1614	1427	651	774	2531	916	2356	3405	6239	2510	1336	924	1697	775
2.331	1584	1580	653	823	2200	940	2224	3069	5941	2252	1252	879	1640	785
2.335	1591	1440	680	830	2056	903	2177	2623	5355	1956	1271	901	1732	842
2.339	1521	1487	659	786	1851	941	2127	2319	4275	1630	1222	992	1694	789
2.343	1483	1440	680	746	1641	1067	2174	1955	3491	1550	1204	960	1752	838
2.347	1560	1492	714	740	1552	1071	2049	1931	2928	1647	1270	923	1735	852
2.351	1468	1495	667	791	1441	1182	2003	2007	2498	1692	1458	930	1712	821
2.355	1451	1466	762	829	1534	1217	1871	2201	2259	2050	1693	890	1694	1189
2.359	1504	1518	829	968	1583	1358	1790	2566	2301	2277	2512	952	1741	1568
2.363	1505	1537	1055	1203	1606	1601	1814	2857	2542	2513	4654	957	1810	1720
2.367	1521	1631	1087	1199	1647	1625	1753	3166	2756	2716	6048	995	1965	1788
2.371	1587	1636	1064	1323	1781	1909	1888	3459	3060	2934	7269	967	1971	1734
2.375	1635	1629	1121	1200	1638	1923	1741	3791	3301	3194	7658	982	1918	1582
2.379	1593	1558	1031	1271	1603	1908	1782	3564	3322	3003	7533	917	1794	1493
2.383	1562	1523	1018	1200	1564	1783	1627	3201	3136	2588	6612	946	1783	1410
2.387	1543	1567	936	1094	1528	1508	1656	2585	2771	2239	5074	911	1713	1311
2.391	1451	1489	883	1027	1517	1309	1561	2047	2268	1854	3915	900	1818	1148
2.395	1449	1364	867	953	1500	1115	1494	1796	2111	1664	2830	898	1693	1010
2.399	1408	1567	766	872	1426	947	1542	1661	1821	1482	2226	919	1626	957
2.403	1355	1356	755	851	1340	873	1453	1512	1741	1437	1986	861	1594	973
2.407	1389	1380	687	868	1354	890	1412	1500	1729	1348	1791	919	1625	942
2.411	1355	1357	795	789	1325	819	1424	1325	1653	1315	1544	927	1564	935
2.415	1430	1313	670	873	1287	779	1379	1404	1691	1296	1447	907	1607	888
2.419	1391	1398	647	829	1301	731	1345	1331	1790	1306	1365	881	1632	877
2.423	1333	1321	753	803	1302	837	1367	1419	1668	1256	1275	890	1528	884
2.427	1376	1385	646	750	1356	755	1391	1337	1570	1279	1167	894	1529	853
2.431	1319	1396	710	774	1254	827	1376	1423	1601	1279	1228	869	1553	837
2.435	1285	1257	635	765	1319	715	1354	1263	1623	1233	1174	892	1468	836
2.439	1273	1274	634	805	1305	720	1423	1343	1578	1201	1114	891	1538	854
2.443	1282	1327	651	725	1291	759	1392	1349	1577	1276	1101	868	1558	738
2.447	1352	1318	661	773	1232	760	1376	1269	1592	1227	1076	862	1571	838
2.451	1327	1278	698	839	1292	753	1385	1268	1611	1272	1092	860	1544	810
2.455	1238	1216	651	728	1234	794	1340	1311	1682	1228	1076	854	1473	853
2.459	1251	1378	637	782	1297	767	1392	1318	1588	1251	962	849	1413	826
2.463	1265	1247	627	796	1270	783	1306	1321	1526	1219	1078	879	1460	877
2.467	1266	1236	642	760	1224	708	1364	1345	1561	1219	1029	886	1456	873
2.471	1298	1211	663	759	1293	811	1316	1301	1553	1253	974	906	1529	890
2.475	1287	1291	699	770	1236	797	1293	1277	1524	1161	983	981	1464	833
2.479	1192	1290	685	799	1237	761	1291	1239	1556	1205	991	926	1404	768
2.483	1296	1260	682	731	1189	759	1326	1209	1511	1150	995	881	1458	796
2.487	1256	1223	603	783	1187	697	1338	1227	1405	1182	938	935	1447	831
2.491	1187	1194	663	727	1212	771	1282	1165	1482	1172	893	836	1475	879
2.495	1214	1214	661	720	1171	716	1367	1250	1522	1132	942	899	1485	838
2.499	1207	1192	638	764	1166	736	1294	1309	1437	1147	873	830	1414	832
2.503	1226	1262	644	765	1168	713	1312	1167	1468	1130	923	924	1403	851
2.507	1166	1185	634	773	1110	758	1317	1175	1464	1170	839	895	1324	862
2.511	1189	1217	660	811	1171	713	1290	1180	1454	1150	817	892	1400	826
2.515	1222	1154	651	767	1169	761	1260	1189	1409	1214	862	833	1370	811
2.519	1214	1173	656	669	1183	703	1180	1177	1451	1198	858	897	1332	812
2.523	1195	1209	663	714	1164	779	1211	1226	1400	1144	949	869	1288	813
2.527	1152	1249	557	736	1154	723	1266	1184	1388	1144	856	881	1291	840
2.531	1176	1203	649	757	1142	718	1262	1131	1406	1069	957	944	1346	778
2.535	1188	1129	580	701	1124	691	1187	1162	1413	1151	876	893	1419	850
2.539	1093	1147	652	737	1098	685	1218	1207	1370	1168	810	855	1364	758
2.543	1130	1245	641	726	1052	744	1207	1217	1382	1131	829	896	1312	812
2.547	1161	1127	656	696	1170	707	1225	1135	1441	1119	823	906	1335	786
2.551	1167	1128	634	709	1143	709	1184	1065	1352	1122	800	879	1321	796
2.555	1136	1111	624	700	1128	667	1155	1222	1314	1130	881	883	1337	810
2.559	1074	1172	649	678	1039	713	1190	1121	1315	1108	862	877	1279	798
2.563	1142	1156	651	756	1131	715	1208	1106	1389	1127	853	885	1287	747
2.567	1188	1197	607	665	1111	703	1156	1080	1410	1163	808	844	1306	813
2.571	1129	1148	662	624	1045	732	1205	1086	1356	1145	873	789	1289	759
2.575	1159	1154	608	710	1073	718	1241	1043	1363	1105	787	875	1284	789
2.579	1066	1052	673	748	1162	690	1197	1093	1349	1125	765	862	1265	767
2.583	1173	1104	647	719	1069	689	1186	1089	1380	1123	801	939	1236	738
2.587	1088	1171	646	752	1021	720	1169	1130	1319	1073	830	823	1198	818
2.591	1200	1150	612	718	1040	736	1288	1100	1496	1137	828	889	1313	824
2.595	1096	1222	633	803	1096	702	1354	1105	1561	1102	889	887	1305	813
2.599	1100	1072	656	711	1098	723	1342	1080	1591	1141	823	909	1273	828
2.603	1087	1109	642	777	1034	771	1283	1126	1826	1203	797	870	1286	789
2.607	1111	1138	640	823	1099	672	1260	1217	1737	1176	829	869	1341	794
2.611	1059	1172	642	1674	1147	729	1264	1178	1738	1210	811	839	1348	793
2.615	1137	1134	660	1959	1121	717	1271	1333	1732	1189	836	880	1392	832
2.619	1127	1102	679	2051	1208	769	1140	1285	1661	1154	832	886	1303	794
2.623	1085	1188	671	1976	1164	727	1185	1135	1497	1241	819	873	1333	903
2.627	1090	1158	943	1848	1152	824	1123	1277	1414	1237	780	880	1292	787
2.631	1102	1123	1533	1818	1254	737	1145	1100	1425	1235	840	923	1239	836
2.635	1120	1160	1592	1782	1073	939	1161	1147	1390	1108	851	846	1240	841
2.639	1129	1114	1625	1626	1030	1454	1079	1112	1317	1092	855	898	1274	870
2.643	1172	1133	1574	1661	1066	1677	1092	1075	1337	1146	875	863	1764	910
2.647	1156	1066	1504	1491	1065	1674	1113	1141	1277	1141	840	892	2350	990
2.651	1136	1121	1436	1449	1108	1647	1128	1395	1272	1106	880	842	2308	2127
2.655	1136	1141	1433	1387	1150	1560	1108	1616	1272	1438	847	895	2422	2471
2.659	1141	1269	1340	1310	1562	1485	1115	1638	1252	1667	882	883	2384	2468
2.663	1163	1647	1240	1293	1751	1471	1183	1689	1262	1826	946	856	2251	2410
2.667	1070	1755	1263	1228	1800	1332	1167	1655	1362	1867	1096	931	2120	2285
2.671	1121	1770	1135	1160	1728	1261	1176	1513	1377	1787	1195	908	2105	2160
2.675	1054	1672	1116	1254	1784	1231	1163	1593	1625	1708	1299	901	2058	2008
2.679	1181	1695	1089	1096	1670	1111	1127	1511	1678	1694	1310	917	1963	1906
2.683	1505	1692	1071	1072	1610	1193	1122	1478	1684	1723	1367	901	1885	1848
2.687	1568	1689	1038	1049	1539	1069	1040	1556	1730	1645	1278	855	1943	1768
2.691	1544	1540	1024	1062	1479	1053	1093	1468	1776	1659	1302	896	1837	1720
2.695	1594	1464	1011	1032	1516	1044	1048	1449	2196	1648	1220	843	1835	1635
2.699	1579	1476	965	1002	1438	938	1213	1452	3262	1827	1235	927	1664	1616
2.703	1540	1505	954	1000	1453	987	1494	1316	5159	2068	1262	875	1670	1496
2.707	1522	1455	919	1023	1376	979	1527	1413	9948	2145	1256	882	1721	1513
2.711	1499	1429	908	944	1452	939	1538	1416	12771	2441	1225	852	1671	1516
2.715	1491	1458	884	1000	1485	973	1525	1498	14078	2601	1161	862	1569	1354
2.719	1494	1340	922	997	1374	1003	1641	1611	13312	2520	1222	882	1600	1328
2.723	1398	1302	863	925	1514	951	1706	1960	11164	2582	1228	864	1615	1386
2.727	1455	1345	893	952	1862	913	1766	2463	6307	2388	1175	864	1537	1320
2.731	1402	1289	886	881	2128	942	1888	2718	4975	2359	1159	824	1549	1289
2.735	1394	1238	883	902	2200	988	2024	2631	3880	2180	1181	826	1530	1187
2.739	1401	1239	854	955	2151	917	1986	2481	3243	2095	1155	897	1399	1274
2.743	1342	1302	858	926	1956	915	1882	2138	2752	1871	1148	864	1502	1208
2.747	1292	1237	876	934	1825	826	1826	1854	2323	1790	1167	854	1511	1190
2.751	1265	1191	828	962	1591	864	1721	1732	2141	1615	1160	822	1489	1263
2.755	1252	1288	830	852	1513	888	1509	1594	1877	1576	1168	881	1395	1138
2.759	1224	1230	766	912	1459	844	1451	1425	1711	1468	1171	862	1440	1108
2.763	1242	1247	773	896	1292	871	1426	1395	1676	1397	1088	874	1424	1162
2.768	1224	1257	818	955	1292	833	1436	1292	1543	1395	1113	859	1395	1104
2.772	1233	1188	821	856	1340	845	1414	1363	1546	1328	1164	870	1413	1093
2.776	1222	1241	899	896	1224	953	1443	1324	1511	1351	1177	940	1440	1067
2.78	1292	1243	887	905	1240	866	1359	1275	1650	1355	1232	955	1495	1132
2.783	1247	1128	857	910	1221	835	1274	1252	1510	1290	1153	954	1405	1046
2.787	1161	1235	875	857	1184	911	1283	1259	1459	1313	1238	984	1423	1074
2.792	1109	1228	781	831	1172	879	1259	1218	1410	1299	1136	1040	1353	1020
2.796	1129	1113	781	911	1119	847	1249	1286	1399	1239	1184	999	1330	1017
2.8	1150	1081	802	852	1164	806	1237	1233	1388	1315	1345	955	1450	1085
2.804	1131	1130	786	901	1070	766	1284	1271	1417	1347	1517	1014	1363	1063
2.808	1119	1139	734	854	1127	810	1308	1177	1370	1283	1628	953	1371	1106
2.812	1068	1121	740	805	1107	799	1301	1234	1435	1221	1600	990	1310	1012
2.816	1125	1137	783	794	1070	794	1236	1138	1451	1276	1601	1001	1323	1089
2.82	1065	1112	778	835	1042	752	1286	1198	1447	1279	1536	1066	1337	962
2.824	1087	1056	736	872	1088	812	1212	1105	1401	1206	1404	979	1321	980
2.828	1143	1097	768	838	1108	813	1209	1141	1365	1199	1388	971	1329	924
2.832	1107	1096	700	786	1076	785	1176	1177	1363	1195	1293	957	1299	935
2.836	1060	1112	729	776	1057	828	1136	1075	1238	1220	1265	941	1234	896
2.84	1071	1044	752	838	1116	771	1055	1139	1314	1220	1280	1020	1321	906
2.844	976	1067	748	806	1029	796	1203	1080	1254	1115	1283	973	1206	886
2.848	1056	984	713	754	1039	731	1156	1041	1242	1104	1125	978	1260	940
2.852	1078	1034	690	789	1061	770	1127	1045	1290	1181	1092	914	1268	918
2.856	1084	1039	726	806	1023	712	1080	999	1314	1128	1116	944	1357	870
2.86	1014	1057	721	770	1054	770	1106	1063	1294	1126	1065	984	1323	918
2.864	1100	1038	691	801	1010	784	1151	1083	1284	1108	1071	959	1296	880
2.868	1019	1079	675	830	1043	777	1130	1078	1307	1212	1089	885	1329	909
2.872	1015	1089	721	814	1033	811	1099	1133	1171	1078	1029	977	1399	937
2.876	1108	1041	687	776	980	789	1128	1029	1254	1243	1048	946	1367	859
2.88	1109	1046	691	799	1024	732	1134	1000	1220	1056	981	994	1305	916
2.884	1093	1094	734	847	1008	816	1066	1101	1245	1144	989	858	1333	906
2.888	1065	1085	775	808	1051	789	1044	1044	1247	1170	949	917	1245	973
2.892	1020	1091	668	769	1078	853	1128	1115	1200	1166	981	982	1348	1039
2.896	1068	1111	741	780	1013	822	1114	1057	1226	1119	1051	920	2894	1057
2.9	990	1033	683	859	1062	1411	1077	1020	1252	1182	926	970	4477	1707
2.904	1022	1122	706	838	1017	2130	1066	1041	1253	1142	911	922	6084	3616
2.908	1064	1064	700	890	980	2441	1087	1038	1310	1292	1041	945	12698	5015
2.912	997	1225	685	1235	1058	2453	1018	1119	1241	1591	1006	926	24246	6814
2.916	1155	1357	722	1571	913	2415	1068	1041	1356	1810	981	965	37300	12540
2.92	1205	1454	744	1608	1045	2227	1127	1048	1350	1905	974	954	46326	21000
2.924	1290	1454	762	1659	1065	2020	1044	1053	1349	2303	946	978	50413	29651
2.928	1422	1584	747	1524	1009	1960	1192	1133	1474	3077	933	924	48328	39156
2.932	1395	1793	976	1457	1103	1746	1317	1415	1590	3916	941	918	40842	46313
2.936	1399	2178	1168	1426	1220	1597	1309	1746	1740	4754	933	959	31178	46782
2.94	1463	2916	1187	1343	1419	1555	1403	2134	1888	5338	930	888	22889	43268
2.944	1534	3748	1339	1287	1719	1476	1532	2226	2375	5097	1011	996	17305	35963
2.948	1645	4200	1199	1235	2044	1362	1592	2429	2949	4980	970	1004	11473	27543
2.952	1705	4401	1201	1236	2369	1433	1669	2406	3266	4482	1000	907	7279	21472
2.956	2130	4091	1082	1203	2417	1338	1652	2148	3382	4036	994	963	6129	16883
2.96	2400	3790	1116	1112	2296	1290	1628	2128	3274	3784	1031	887	5200	11853
2.964	3045	3398	1070	1072	2235	1259	1773	2076	3426	4480	989	898	4570	7066
2.968	3458	3044	1080	1058	2425	1156	2057	2720	4531	6305	1023	963	4013	5703
2.972	3412	2674	963	1028	3486	1185	3209	6265	8314	11723	1059	887	3822	5031
2.976	3412	2513	933	1010	6863	1062	5915	22238	22794	20285	1038	947	3733	4377
2.98	3016	2542	924	1013	18856	1088	12137	42959	41507	29140	1069	1040	3748	3883
2.984	2867	2561	986	914	29966	1061	19616	60334	59367	36233	938	962	4028	3399
2.988	2760	2520	881	1005	37270	990	24336	68649	69706	38036	973	967	4335	3038
2.992	2468	2592	851	979	39441	1021	25972	67735	71608	35350	1006	946	4237	2902
2.996	2298	2573	833	941	35589	1025	22916	57093	62334	29761	928	953	4122	2632
3	2214	2463	809	923	28867	976	19122	41531	47537	21046	917	925	3652	2351
3.004	2031	2278	868	891	19683	970	14594	28377	33508	14215	935	918	3181	2284
3.008	1776	1924	881	859	11641	899	7084	17795	20218	7134	954	872	2893	2141
3.012	1758	1944	765	835	6045	906	5000	7670	8488	4924	926	951	2523	2088
3.016	1664	1677	853	897	4181	908	3656	5071	5507	3463	913	939	2334	1911
3.02	1533	1531	799	885	2899	829	2733	3438	3909	2709	905	941	2130	1829
3.024	1417	1450	778	879	2350	848	2195	2717	2939	2194	958	991	1934	1745
3.028	1436	1347	808	893	1951	816	1893	2170	2372	1960	876	992	1843	1744
3.032	1331	1305	781	850	1727	814	1631	1909	2065	1697	935	883	1834	1711
3.036	1222	1279	783	765	1561	830	1492	1604	1914	1654	935	926	1648	1587
3.04	1302	1194	781	843	1421	796	1457	1484	1757	1501	872	912	1662	1573
3.044	1266	1161	720	769	1357	758	1307	1475	1570	1469	871	919	1659	1590
3.048	1162	1291	750	805	1256	806	1318	1314	1515	1419	855	912	1592	1488
3.052	1161	1178	815	831	1230	780	1289	1282	1606	1415	899	917	1586	1434
3.056	1165	1206	770	813	1228	779	1345	1215	1523	1310	921	876	1562	1445
3.06	1161	1177	720	806	1187	781	1191	1217	1475	1267	888	899	1612	1363
3.064	1061	1214	696	762	1166	793	1192	1169	1559	1248	871	937	1565	1395
3.068	1190	1182	712	830	1113	816	1245	1096	1466	1247	852	934	1472	1215
3.072	1053	1101	735	847	1081	783	1173	1108	1491	1253	863	858	1435	1320
3.076	1051	1041	714	713	1089	782	1144	1076	1556	1215	865	865	1461	1197
3.08	1092	1109	764	829	1061	740	1093	1149	1582	1185	888	973	1508	1267
3.084	1028	1124	670	791	1121	746	1085	1086	1518	1188	919	966	1421	1143
3.088	1013	1139	763	844	939	794	1068	1087	1444	1197	838	921	1409	1177
3.092	1031	1088	760	800	1030	707	1115	1107	1345	1144	872	926	1350	1123
3.096	1048	1030	715	728	1051	772	1094	1050	1352	1139	873	892	1347	1272
3.1	1034	994	733	700	1058	766	1069	1043	1267	1150	904	893	1383	1130
3.104	988	1015	727	749	1042	837	1101	1018	1315	1128	893	934	1383	1094
3.108	999	1052	719	691	1066	779	1032	1055	1223	1152	883	913	1401	1152
3.112	1045	1007	760	771	980	729	1114	995	1323	1209	903	899	1295	1161
3.116	992	994	731	761	1002	779	1042	994	1250	1201	877	885	1403	1081
3.12	944	995	646	770	962	733	1076	1011	1238	1162	791	974	1334	1121
3.124	977	1064	740	743	986	776	1008	1047	1271	1165	870	848	1244	1152
3.128	1009	1003	718	747	1045	789	1027	1058	1263	1171	825	939	1349	1079
3.132	962	1098	669	762	1058	753	1119	1157	1511	1261	875	879	1343	1092
3.136	966	948	745	763	1007	741	1052	1361	1533	1286	838	873	1283	990
3.14	960	1013	691	743	1136	775	1103	1333	1674	1247	894	860	1278	1068
3.144	992	1000	682	715	1191	787	1124	1456	1708	1364	836	921	1286	1004
3.148	986	949	761	760	1225	764	1243	1444	1712	1332	828	922	1245	1063
3.152	996	982	718	782	1169	700	1122	1410	1727	1285	844	860	1252	1024
3.156	966	1071	780	767	1143	770	1087	1398	1550	1261	843	895	1262	1083
3.16	933	998	726	746	1089	719	1125	1177	1505	1208	810	888	1219	991
3.164	965	1043	701	721	1007	815	1047	1201	1328	1136	851	958	1234	1025
3.168	959	999	677	713	1075	770	1031	1071	1255	1144	852	887	1210	968
3.172	954	939	708	715	964	701	973	1064	1278	1087	858	901	1220	1010
3.176	926	1037	674	746	960	741	966	1039	1230	1007	829	906	1243	1040
3.18	932	1004	722	774	1081	746	958	993	1261	1102	838	898	1241	1010
3.184	974	1021	676	794	983	710	989	978	1165	1087	856	856	1211	1018
3.188	936	939	741	809	926	763	967	1010	1109	1105	888	942	1246	984
3.192	934	1017	675	789	886	761	992	1027	1182	1118	804	895	1367	1079
3.196	966	1014	730	834	969	783	1053	979	1207	1055	931	943	1168	1024
3.2	982	978	747	725	917	830	1011	931	1234	1077	843	925	1232	975
3.204	1035	1047	763	787	951	972	1283	999	1211	1131	870	968	1298	919
3.208	1012	1119	688	794	981	1558	2269	965	1252	1047	926	929	1459	999
3.212	1102	1308	714	703	901	3146	3973	996	1343	1075	874	934	2242	1004
3.216	1216	1710	722	727	882	7067	7771	935	1604	1024	859	936	3396	885
3.22	1655	2365	692	720	913	16572	15945	986	2040	1015	869	966	5037	954
3.224	2125	3241	711	748	918	28920	32723	1057	2570	1045	823	918	6754	1013
3.228	2677	3731	654	727	896	42986	60103	933	3266	953	828	840	7860	902
3.232	3238	4060	659	718	879	59298	103150	921	3410	1102	844	874	8368	1015
3.236	3627	3938	674	753	855	84091	151218	939	3680	1035	851	841	7531	929
3.24	3545	3575	715	741	869	108327	201727	939	3423	1138	878	866	6369	1009
3.244	3210	3031	729	791	920	130032	243954	919	3199	1153	795	865	4904	1030
3.248	2658	2505	763	779	909	141942	260616	1024	2822	1097	802	867	3619	1085
3.252	2248	2065	791	1089	888	140073	248519	986	2541	1116	818	879	2793	1189
3.256	1794	1640	928	1584	912	120632	212857	1059	2213	1148	752	878	2067	1209
3.26	1470	1409	1191	2488	949	89361	156499	1013	1878	1190	895	930	1734	1375
3.264	1293	1236	1440	3406	916	55289	100198	966	1829	1159	809	912	1449	1509
3.268	1152	1162	1830	4399	1009	32914	54077	983	1647	1153	826	856	1470	1906
3.272	1036	1109	2061	4761	1007	18066	28485	946	1491	1121	808	888	1318	2169
3.276	1041	1032	2252	4883	947	8131	12676	929	1347	1109	801	904	1247	2361
3.28	967	1023	2269	4446	912	5339	6023	920	1280	1078	793	878	1235	2568
3.284	963	1027	2143	3919	1003	4046	3850	939	1183	1079	823	818	1240	2442
3.288	876	1017	1929	3305	927	3902	2705	928	1193	1063	817	908	1267	2379
3.292	955	1005	1722	2700	985	3837	2103	895	1180	1029	837	883	1211	2203
3.296	987	986	1587	2249	925	3637	1903	912	1139	1006	835	955	1248	2004
3.3	904	925	1383	1877	978	3521	1745	911	1152	1056	788	896	1269	1879
3.304	895	1076	1181	1626	941	3164	1528	895	1091	1045	809	840	1352	1685
3.308	1052	987	1083	1392	931	2779	1488	942	1116	1040	842	893	1291	1596
3.312	1051	1078	1124	1411	1008	2366	1477	944	1218	1126	792	874	1314	1551
3.316	1039	1038	947	1173	987	2068	1512	980	1200	1151	829	853	1444	1484
3.32	1049	1026	942	1194	1092	1823	1398	950	1214	1079	808	915	1366	1384
3.324	1062	1044	850	1009	975	1562	1358	1065	1278	1032	782	941	1416	1343
3.328	1060	1040	836	970	1028	1422	1289	1001	1196	1036	814	806	1291	1231
3.332	1010	1066	756	1018	991	1280	1271	1081	1217	1112	803	918	1162	1129
3.336	1001	1068	780	934	969	1239	1277	1002	1105	1037	759	896	1259	1087
3.34	1009	945	777	962	956	1211	1297	935	1121	1068	784	879	1274	1094
3.344	942	998	836	910	961	1123	1264	913	1202	1065	794	866	1254	1082
3.348	953	1052	817	930	988	1110	1226	975	1121	1145	810	855	1220	1055
3.352	986	1002	864	969	992	1136	1178	945	1129	1060	782	948	1174	1103
3.356	963	955	3333	959	933	2844	1099	905	1124	1294	840	895	1167	1084
3.36	1005	939	17593	2094	1010	12658	1188	906	1171	4137	795	919	1165	1247
3.364	1779	1898	43011	12931	1464	31685	2137	921	1100	17866	799	847	2045	4213
3.368	6919	7358	93035	37166	7042	62614	8860	904	1198	39576	831	881	8499	24620
3.372	26523	27077	146133	83888	29894	96192	32464	1874	2795	72419	810	900	34407	57745
3.376	50793	50870	205020	140791	59994	130077	70247	7279	12848	110533	794	894	77808	121102
3.38	96300	97432	258963	209892	117326	160532	113442	23102	31263	159380	854	909	134934	190976
3.384	141295	145490	305774	272380	181240	189487	160109	40169	55005	208236	801	951	201701	261232
3.388	193545	197903	351580	324394	246996	216649	213072	54622	92176	251780	837	866	265192	326030
3.392	244012	249673	391034	361207	304706	239646	256747	69640	115075	279654	789	871	313498	213873
3.396	289075	286223	326045	398868	359042	252620	289202	70227	125404	287332	785	929	346437	392361
3.4	335233	296772	380098	425400	391649	251221	167838	55462	120043	268636	813	915	367542	430851
3.404	359397	291579	475922	447546	417571	230682	333443	44319	101023	220351	808	929	211544	435181
3.408	390023	251128	479149	478659	450614	191559	340039	33531	75968	155503	804	909	196209	405564
3.412	401963	190100	451519	424040	445111	145111	332658	24217	49383	100256	790	834	271650	329501
3.416	387340	125502	351798	371844	419218	100614	286152	16953	34912	53104	847	929	177904	212612
3.42	318133	73404	219467	242456	339929	62385	212160	11356	23825	32634	796	812	97784	114030
3.424	220659	41069	111099	125043	210348	38698	133990	7168	16402	21578	737	822	46457	52401
3.428	125498	27414	48892	54071	104788	27395	76981	5584	10976	14673	856	851	27692	32042
3.432	57881	18986	31554	32968	45220	20134	41379	4183	6955	9517	992	864	18176	21228
3.436	34244	12994	23257	22540	27530	15947	26306	3530	5608	9773	1107	895	12060	14643
3.44	23472	8974	19962	17425	19707	14414	18327	3181	4779	12397	1113	844	7825	12676
3.444	16444	8089	20838	15306	14224	16016	13575	2769	4575	29736	1106	783	6951	9068
3.448	14891	8684	27549	16562	12229	21538	9649	2711	5752	51615	1132	856	7539	10867
3.452	15160	12220	42171	27530	10079	27471	10605	3381	9604	84648	1154	873	10554	29469
3.456	19432	18039	71398	50256	19554	34415	13907	5289	25253	124042	1295	922	27797	57012
3.46	29714	46238	109628	88127	37617	42335	31714	9059	45312	169765	2916	837	52413	100129
3.464	44320	71191	146028	127409	66995	49653	45728	16922	69392	209533	6454	887	82375	146107
3.468	69583	89548	179874	164901	103567	59162	64252	21920	87517	238325	9486	831	110021	183057
3.472	95648	100817	193668	189421	135275	63360	79127	23192	99673	247302	14501	874	126984	198084
3.476	118178	104346	182071	187417	152342	62980	91131	22657	101308	227918	15124	852	127363	185806
3.48	129429	96056	151974	165997	152307	60031	94755	19972	89265	183300	14562	834	108777	152833
3.484	124904	80567	110959	129296	131535	51254	89864	16320	72404	131462	9873	913	84417	109702
3.488	107905	57297	74117	89680	101805	41591	79042	10040	51661	86199	8476	892	58484	73121
3.492	84317	38821	46220	55315	72055	32764	64288	7803	36704	52534	7143	808	40246	45757
3.496	56335	25423	30877	35778	44056	23848	47008	6049	24987	32084	6077	838	25920	27284
3.5	37916	17224	17666	23963	26740	17265	32378	4755	16332	19566	5171	817	14362	17348
3.504	23872	9589	10207	11535	16946	10190	21517	4009	8768	10320	4429	883	8454	9243
3.508	11417	7383	8222	8990	9000	8038	11172	3183	7139	7922	3810	810	6591	7264
3.512	8608	6059	6873	7384	7162	6318	8559	2730	5436	6630	3408	875	5295	5933
3.516	6711	4992	5763	6184	5793	5117	6633	2463	4703	5456	3070	945	4445	5140
3.52	5446	4331	5093	5626	4794	4396	5251	2169	4083	4681	2755	879	3888	4535
3.524	4775	3711	4585	5095	4246	3736	4527	1952	3755	4222	2611	836	3487	3977
3.528	4130	3397	4271	4467	3801	3342	3946	1902	3455	3830	2372	874	3258	3607
3.532	3775	3183	3915	4216	3602	2990	3551	1746	3149	3484	2132	849	2926	3425
3.536	3416	2866	3678	4026	3224	2855	3183	1759	2914	3164	1894	843	2752	3045
3.54	3201	2699	3450	3602	3024	2526	2835	1689	2712	3009	1884	876	2555	2932
3.544	2876	2531	3104	3463	2916	2402	2721	1627	2507	2738	1892	872	2472	2789
3.548	2760	2457	3035	3336	2672	2279	2474	1561	2304	2636	1655	819	2407	2620
3.552	2693	2329	2845	3094	2564	2143	2325	1537	2263	2471	1617	850	2354	2568
3.556	2478	2183	2694	2896	2400	2080	2345	1368	2119	2390	1537	892	2244	2391
3.56	2362	2114	2607	2833	2436	1966	2137	1315	2067	2216	1486	822	2193	2266
3.564	2315	2106	2459	2638	2213	1978	2005	1402	1905	2176	1463	925	2106	2193
3.568	2173	1905	2476	2693	2110	1842	2041	1321	1905	2118	1311	895	2064	2058
3.572	2124	1888	2396	2676	2025	1813	1942	1259	1774	1951	1431	879	1959	2153
3.576	2168	1821	2240	2478	1970	1719	1842	1251	1739	1991	1262	819	1951	1960
3.58	1938	1755	2216	2359	2029	1643	1729	1155	1664	1872	1366	818	1876	1849
3.584	1945	1786	2095	2217	1926	1627	1763	1171	1682	1915	1222	864	1843	1947
3.588	1864	1674	2185	2217	1928	1612	1806	1146	1577	1795	1189	861	1767	1796
3.592	1854	1696	2101	2016	1839	1472	1655	1188	1567	1738	1187	853	1740	1822
3.596	1846	1613	1967	2068	1773	1578	1726	1166	1508	1821	1185	855	1785	1715
3.6	1791	1627	1872	2060	1729	1352	1587	1139	1481	1717	1147	880	1685	1690
3.604	1729	1614	1770	2050	1784	1447	1564	1105	1550	1683	1100	881	1711	1597
3.608	1708	1569	1820	1881	1643	1421	1544	1114	1505	1599	1199	879	1690	1669
3.612	1679	1540	1774	1903	1677	1414	1572	1114	1488	1607	1157	913	1652	1614
3.616	1664	1463	1674	1775	1639	1328	1515	1061	1480	1585	1064	824	1639	1579
3.62	1599	1493	1827	1771	1602	1367	1513	1094	1449	1539	1080	935	1648	1546
3.624	1491	1498	1644	1725	1571	1320	1521	1077	1425	1544	1026	845	1632	1473
3.628	1570	1488	1688	1877	1565	1265	1461	1094	1462	1512	1070	854	1590	1521
3.632	1509	1450	1619	1698	1580	1236	1457	1046	1449	1473	1097	862	1592	1504
3.636	1457	1400	1534	1637	1505	1317	1463	998	1425	1435	1045	833	1551	1436
3.64	1470	1469	1581	1739	1537	1196	1428	1047	1402	1435	1055	929	1532	1429
3.644	1425	1384	1597	1688	1452	1312	1425	1057	1368	1494	1113	883	1474	1453
3.648	1472	1384	1500	1635	1393	1183	1362	980	1359	1458	980	846	1457	1410
3.652	1415	1423	1444	1661	1481	1259	1350	998	1354	1443	999	900	1494	1335
3.656	1347	1389	1402	1620	1433	1158	1330	984	1431	1431	1006	860	1509	1406
3.66	1462	1338	1437	1460	1386	1152	1340	982	1347	1397	1029	815	1444	1409
3.664	1360	1331	1347	1496	1363	1148	1260	1026	1303	1311	935	900	1381	1297
3.668	1331	1332	1414	1392	1334	1177	1336	1042	1319	1367	982	814	1417	1400
3.672	1341	1306	1416	1438	1416	1144	1346	987	1275	1371	908	904	1445	1322
3.676	1343	1303	1324	1424	1333	1137	1287	959	1311	1359	991	943	1466	1305
3.68	1331	1292	1382	1484	1342	1150	1303	1002	1274	1340	919	826	1414	1273
3.684	1427	1276	1340	1413	1305	1168	1277	896	1176	1326	983	910	1413	1228
3.688	1319	1250	1396	1361	1265	1126	1228	1042	1356	1244	891	868	1270	1304
3.692	1292	1309	1292	1477	1270	1070	1283	993	1244	1311	917	826	1342	1216
3.696	1284	1230	1383	1402	1235	1056	1335	946	1314	1316	928	878	1339	1243
3.7	1210	1222	1264	1470	1260	1116	1212	959	1264	1228	859	844	1306	1261
3.704	1231	1166	1347	1538	1234	1049	1247	959	1226	1289	838	873	1316	1221
3.708	1180	1146	1317	1415	1240	1071	1268	935	1270	1239	921	853	1367	1256
3.712	1194	1199	1318	1351	1273	1021	1262	948	1223	1266	932	846	1325	1262
3.716	1300	1194	1254	1347	1313	1043	1230	948	1223	1339	936	838	1352	1237
3.72	1226	1293	1372	1405	1336	1064	1266	921	1276	1333	869	887	1407	1234
3.724	1262	1349	1258	1386	1433	1009	1224	1043	1287	1302	884	852	1470	1341
3.728	1322	1408	1239	1322	1479	1024	1173	976	1246	1252	884	843	1611	1335
3.732	1409	1422	1251	1399	1475	1054	1154	936	1246	1312	974	904	1749	1333
3.736	1454	1446	1281	1369	1548	1035	1174	957	1238	1236	860	828	1687	1348
3.74	1519	1496	1318	1362	1648	1059	1145	983	1206	1194	913	848	1806	1372
3.744	1496	1593	1260	1374	1624	1030	1150	912	1175	1194	919	824	1808	1245
3.748	1544	1508	1206	1360	1603	983	1210	946	1214	1212	863	892	1833	1259
3.752	1596	1606	1192	1218	1642	1028	1168	952	1260	1148	853	873	1872	1293
3.756	1653	1502	1180	1255	1567	947	1281	979	1209	1290	917	865	1825	1240
3.76	1605	1524	1117	1208	1560	1006	1202	1053	1459	1380	829	914	1714	1250
3.764	1553	1383	1203	1259	1576	1023	1320	1291	1933	1639	903	811	1607	1208
3.768	1584	1324	1065	1251	1788	1012	1627	1979	3171	2122	872	871	1542	1270
3.772	1522	1314	1131	1151	2147	1063	2096	2973	5087	2763	850	877	1486	1176
3.776	1451	1337	1084	1230	2886	1144	2747	4550	7282	3471	836	870	1539	1278
3.78	1354	1271	1096	1182	4021	1190	3457	7339	11500	4292	875	842	1520	1268
3.784	1411	1260	1133	1269	4789	1255	4165	8836	13807	4763	820	851	1556	1193
3.788	1431	1339	1148	1271	5641	1299	4789	9547	15019	4905	824	873	1571	1163
3.792	1499	1305	1154	1271	5831	1223	4840	9239	14142	4805	817	862	1470	1137
3.796	1479	1260	1093	1325	5547	1238	4738	8345	12025	4362	876	845	1490	1211
3.8	1458	1344	1100	1268	4680	1157	4325	5554	9247	3465	831	795	1428	1260
3.804	1533	1332	1167	1304	3813	1175	3653	4290	6639	2813	817	869	1479	1161
3.808	1448	1199	1113	1308	3168	1088	3076	3408	5089	2511	889	858	1355	1118
3.812	1377	1187	1087	1266	2509	1009	2528	2511	3792	2113	867	809	1345	1201
3.816	1377	1120	1095	1204	1992	1096	2154	1973	2895	1738	809	872	1305	1365
3.82	1255	1057	1112	1264	1732	988	1873	1697	2301	1578	786	879	1165	1374
3.824	1170	1075	1090	1183	1545	976	1620	1439	1872	1441	824	915	1219	1590
3.828	1165	1083	1084	1242	1378	968	1436	1274	1643	1416	870	805	1225	1659
3.832	1221	1105	1129	1192	1321	977	1491	1134	1619	1308	850	845	1144	1828
3.836	1045	1029	1069	1203	1210	1015	1406	1060	1488	1211	852	863	1190	1912
3.84	1098	1053	1119	1192	1307	906	1313	1070	1413	1135	804	849	1211	1950
3.844	1076	1087	1008	1180	1479	869	1479	962	1324	1175	812	909	1275	1982
3.848	1101	1085	1047	1218	1437	894	1410	1004	1187	1188	817	908	1498	2048
3.852	1113	1158	1026	1170	1523	973	1415	926	1282	1081	853	783	1630	2249
3.856	1270	1077	1086	1220	1523	868	1421	948	1249	1142	827	879	1594	2149
3.86	1339	1117	1114	1190	1627	934	1415	1006	1284	1198	810	898	1661	2229
3.864	1390	1142	1086	1177	1690	949	1461	947	1152	1128	884	834	1568	2374
3.868	1433	1145	1068	1212	1697	909	1422	980	1154	1174	763	873	1540	2507
3.872	1505	1130	1106	1274	1827	862	1415	915	1142	1096	900	907	1442	2517
3.876	1531	1167	1110	1272	1943	957	1425	916	1212	1059	776	843	1394	2671
3.88	1534	1131	1140	1357	1812	930	1334	924	1233	1106	863	857	1345	2892
3.884	1339	1199	1134	1304	1747	949	1306	950	1192	1074	881	819	1392	3172
3.888	1388	1090	1186	1355	1738	1010	1241	886	1066	1095	813	788	1312	3935
3.892	1359	1108	1227	1423	1633	1043	1278	906	1125	1079	825	871	1353	5171
3.896	1354	1216	1267	1505	1620	1068	1268	956	1093	1054	844	837	1374	7058
3.9	1309	1155	1341	1519	1662	1228	1287	925	1191	1024	832	832	1370	9315
3.904	1323	1175	1449	1556	1629	1282	1340	983	1177	1058	822	850	1366	12626
3.908	1308	1182	1398	1722	1748	1411	1278	1027	1169	1032	853	848	1388	14527
3.912	1266	1227	1408	1854	1715	1460	1392	1033	1124	1088	824	910	1401	14884
3.916	1245	1093	1463	2029	1702	1424	1462	1031	1122	1057	835	908	1364	14014
3.92	1198	1073	1416	1850	1723	1500	1467	972	1173	1034	820	823	1406	12740
3.924	1225	1091	1411	1909	1659	1494	1390	1021	1100	1053	807	813	1351	9349
3.928	1200	1184	1268	1764	1609	1439	1408	979	1135	1097	799	859	1354	7713
3.932	1224	1174	1258	1613	1591	1353	1298	943	1183	1051	824	848	1369	6503
3.936	1202	1152	1252	1458	1503	1214	1270	970	1155	1061	862	848	1308	5509
3.94	1213	1096	1118	1441	1391	1260	1267	980	1189	1084	771	865	1273	4185
3.944	1207	1068	1119	1365	1385	1232	1118	993	1297	994	769	836	1309	3240
3.948	1244	1088	1224	1318	1372	1080	1092	943	1303	981	792	876	1287	2599
3.952	1228	1109	1245	1338	1354	1097	1113	975	1256	998	835	836	1329	2352
3.956	1242	1090	1362	1391	1478	1032	1119	967	1256	1055	754	798	1344	2383
3.96	1179	1219	1418	1416	1568	1074	1180	940	1233	1092	800	848	1295	2376
3.964	1260	1206	1603	1663	1773	1083	1199	868	1269	1176	836	856	1374	2467
3.968	1207	1242	1858	1859	1827	1071	1300	957	1227	1263	778	846	1285	2602
3.972	1240	1260	2047	1959	1998	1205	1300	897	1120	1261	881	870	1290	2740
3.976	1273	1218	1995	2135	2248	1212	1437	884	1128	1248	839	839	1322	2830
3.98	1272	1278	1978	2284	2125	1244	1476	895	1028	1292	795	871	1374	2653
3.984	1352	1383	1868	2090	2093	1214	1466	952	1081	1167	855	895	1376	2392
3.988	1323	1161	1531	1911	1872	1143	1486	909	1113	1115	780	818	1290	2143
3.992	1194	1200	1535	1775	1781	1197	1290	913	1033	1114	768	837	1308	1910
3.996	1182	1141	1302	1536	1590	1014	1294	899	999	1070	787	890	1193	1748
4	1108	1021	1217	1449	1397	1055	1287	895	1004	1038	753	897	1229	1669
4.004	1085	1012	1111	1288	1319	1049	1237	863	991	1121	750	872	1193	1533
4.008	1158	1099	1036	1199	1305	1046	1238	863	1057	965	929	832	1278	1550
4.012	1122	1046	1084	1201	1257	1094	1340	892	1030	1023	822	859	1230	1397
4.016	1104	1026	1011	1186	1147	1162	1607	883	998	1017	788	804	1241	1325
4.02	1124	1078	1061	1168	1114	1325	1790	842	1046	954	817	825	1176	1298
4.024	1072	961	943	1092	1144	1386	2011	855	1009	1021	816	884	1268	1308
4.028	1092	995	994	1073	1136	1511	2271	839	1040	1084	773	797	1231	1319
4.032	1000	995	975	1022	1063	1606	2359	833	1053	1009	777	831	1224	1308
4.036	1064	978	899	1016	1110	1655	2260	844	1020	1055	780	840	1205	1291
4.04	1040	1010	907	1008	1100	1733	2116	829	1020	1044	811	841	1180	1330
4.044	1052	973	998	1130	1106	1568	1912	919	1021	936	772	895	1135	1186
4.048	1031	1037	992	1079	1156	1420	1830	874	1075	992	805	843	1204	1298
4.052	1049	1057	911	1016	1115	1368	1550	903	1035	1054	820	796	1134	1145
4.056	1049	993	983	1027	1049	1193	1428	934	1136	1035	859	834	1184	1189
4.06	970	1057	947	1128	1092	1116	1280	969	1115	1085	842	806	1234	1238
4.064	1025	1033	962	1084	1116	1068	1205	990	1219	1100	837	901	1149	1218
4.068	1040	1064	976	1127	1151	1004	1143	1048	1290	1114	849	842	1218	1160
4.072	1123	1053	992	1055	1191	939	1139	1077	1399	1098	912	852	1289	1208
4.076	1067	1096	962	1128	1080	964	1066	1155	1473	1145	810	917	1226	1237
4.08	1062	1011	928	1089	1175	1007	1081	1249	1632	1137	846	832	1193	1169
4.084	1100	1062	954	1122	1154	952	1031	1238	1713	1080	861	823	1297	1236
4.088	1077	1070	974	1135	1157	951	1054	1284	1797	1142	929	814	1231	1218
4.092	1083	1003	969	1089	1113	978	1117	1294	1755	1173	935	903	1197	1260
4.096	1028	1029	1019	1040	1105	942	1081	1263	1738	1150	877	910	1198	1173
4.1	1052	1080	958	1171	1108	900	1046	1229	1616	1152	896	834	1182	1173
4.104	1093	964	983	1024	1132	957	1045	1108	1426	1164	965	879	1174	1182
4.108	1035	1057	932	1058	1062	929	1000	1063	1280	1048	887	932	1158	1126
4.112	1105	1045	950	1044	1068	915	1054	1016	1249	974	894	827	1146	1157
4.116	1059	976	995	1082	1029	944	1003	997	1253	947	881	922	1192	1085
4.12	1007	1012	912	1031	1069	908	980	898	1049	982	836	874	1134	1115
4.124	1004	1006	951	1040	1105	848	1034	866	1051	960	834	825	1176	1113
4.128	877	960	884	984	1050	881	911	907	1001	995	775	857	1110	1141
4.132	970	927	855	1003	1052	876	1029	860	1001	1052	833	915	1170	1137
4.136	1063	877	891	955	1015	806	1048	831	982	987	887	847	1100	1088
4.14	997	965	909	1017	1002	897	918	871	1059	914	835	862	1094	1092
4.144	924	969	905	987	1022	869	978	891	1014	956	748	896	1099	1094
4.148	998	946	947	947	1025	874	924	869	1084	967	791	865	1104	1040
4.152	939	922	916	1003	1023	862	1024	853	1052	1004	799	897	1152	1058
4.156	991	942	909	1011	998	891	1061	842	1115	981	808	839	1098	1055
4.16	996	900	900	938	1002	819	1049	846	1171	1010	820	828	1094	1076
4.164	982	971	846	960	1027	827	1023	881	1205	961	826	827	1156	1091
4.168	914	913	927	952	966	870	1040	832	1156	990	824	859	1135	1079
4.172	987	958	896	977	899	837	1010	852	1181	1035	852	893	1116	1076
4.176	992	951	864	935	995	842	1045	840	1158	1056	857	847	1080	1139
4.18	926	968	943	970	985	856	1024	851	1147	1131	807	863	1081	1066
4.184	933	1010	902	955	956	847	927	856	1095	1168	878	805	1126	1046
4.188	1024	955	875	922	998	840	976	879	1019	1106	871	929	1186	1094
4.192	958	918	912	1066	1015	854	970	904	1025	1093	835	886	1087	1107
4.196	897	948	935	946	1010	797	1013	887	1032	1099	867	885	1080	1064
4.2	947	878	835	957	940	831	973	906	1021	1048	819	795	1138	1074
4.204	989	992	900	930	912	804	941	849	1096	1124	818	852	1088	1072
4.208	959	932	902	964	946	837	947	857	1096	1150	863	899	1086	1056
4.212	998	882	938	927	1043	874	945	865	1065	1024	903	879	1164	1088
4.216	952	928	890	938	917	862	930	913	1055	1073	853	825	1037	1067
4.22	923	866	843	904	967	795	930	846	1102	1027	829	842	1081	1039
4.224	1018	955	901	885	935	866	924	909	1029	978	860	834	1080	1087
4.228	886	929	897	960	994	890	929	920	1034	1014	880	887	1110	1069
4.232	977	989	840	931	954	817	988	867	989	1068	829	836	1088	1046
4.236	913	944	863	910	915	846	964	869	962	963	831	860	1100	1125
4.24	926	950	829	883	948	771	881	859	960	986	873	844	1107	1005
4.244	921	973	834	880	888	833	897	869	1019	998	877	843	1091	1062
4.248	916	946	867	856	916	852	951	856	1002	975	833	840	1195	989
4.252	932	955	883	901	972	824	947	792	1003	995	784	847	1116	1004
4.256	935	932	897	906	987	816	974	859	982	1015	884	871	1090	1048
4.26	913	899	878	935	929	856	919	875	1042	934	876	848	1265	1048
4.264	905	915	876	946	974	876	967	860	948	1011	937	853	1069	1088
4.268	978	970	951	847	962	844	891	881	1027	993	835	853	1067	1027
4.272	887	904	839	967	918	846	971	923	975	992	896	856	1148	1021
4.276	909	995	854	950	938	832	970	1250	990	1042	882	886	1280	1016
4.28	916	954	846	884	964	858	955	2419	1061	1114	903	807	1635	977
4.284	976	986	845	972	980	786	946	5820	1336	1184	888	810	2638	1020
4.288	940	1145	806	878	919	826	920	15955	2217	1540	930	880	5081	1046
4.292	1064	1543	792	941	840	778	934	29141	3996	2103	821	839	8430	1003
4.296	1123	2166	890	856	985	811	927	45238	6399	3022	888	831	18254	999
4.3	1482	2985	852	875	998	921	903	61693	9234	3796	897	849	26113	990
4.304	1779	3926	842	852	934	781	919	74861	15365	4843	876	945	32000	1085
4.308	2223	4739	865	848	1098	771	945	80846	17286	5457	802	901	35754	1057
4.312	2794	5392	849	909	1130	794	974	79767	18511	5799	828	885	35432	1194
4.316	3096	5521	903	903	1189	835	1019	72091	18640	5802	891	806	32741	1111
4.32	3323	5442	909	923	1254	866	1050	60945	16909	5304	903	858	20567	1184
4.324	3458	5013	892	985	1306	840	1041	48793	13827	4745	894	873	15582	1187
4.328	3123	4435	906	1026	1212	810	1160	35892	9214	4209	874	842	16516	1118
4.332	2960	3647	749	996	1184	881	1161	24904	7177	3435	865	834	9576	1122
4.336	2686	3080	877	967	1207	886	1196	16349	5568	2722	873	842	7260	1030
4.34	2230	2559	859	995	1124	798	1111	8464	4335	2325	871	878	5287	1115
4.344	1945	2212	883	998	1053	873	1069	6190	3461	1974	871	821	4045	1083
4.348	1711	1864	861	872	1105	849	1043	4478	2648	1721	849	855	3062	1057
4.352	1503	1598	835	919	1013	881	1046	3298	2281	1529	856	865	2563	1056
4.356	1327	1389	768	846	964	904	1014	2640	1978	1482	805	891	2129	1040
4.36	1242	1238	792	974	1070	838	979	2188	1680	1358	863	841	1901	1013
4.364	1171	1196	827	869	1001	818	878	1819	1582	1217	939	899	1665	1012
4.368	1128	1154	820	885	969	843	959	1600	1446	1179	883	874	1571	960
4.372	1071	1085	811	852	923	821	956	1476	1357	1103	872	774	1452	984
4.376	1013	1034	845	882	864	811	956	1423	1339	1119	844	795	1482	984
4.38	980	1016	806	845	906	820	983	1334	1250	1090	834	849	1383	929
4.384	1008	992	699	837	921	801	849	1256	1238	1097	851	840	1333	970
4.388	995	1020	801	902	884	894	917	1182	1210	1100	914	882	1288	954
4.392	963	959	781	883	900	818	937	1103	1153	1043	928	809	1317	1001
4.396	948	967	854	863	974	777	951	1057	1011	1013	822	890	1336	1022
4.4	934	925	829	844	885	841	944	1051	1106	941	827	809	1163	947
4.404	933	959	769	868	887	826	869	1093	1066	957	827	842	1241	975
4.408	938	906	796	815	956	791	890	1059	1011	985	861	814	1213	1015
4.412	918	974	818	868	933	842	933	978	986	1001	882	817	1186	999
4.416	829	960	857	846	934	804	869	1023	1047	992	870	791	1171	937
4.42	869	956	792	827	860	796	842	954	1014	923	865	898	1123	1078
4.424	920	915	736	842	924	874	885	1038	1049	990	857	838	1172	987
4.428	861	969	816	867	862	799	892	929	983	998	831	880	1181	956
4.432	899	903	777	917	864	793	922	908	969	934	909	836	1118	938
4.436	905	859	824	861	897	737	893	902	984	968	857	820	1160	1023
4.44	859	920	770	878	940	817	881	962	1001	1003	796	904	1129	933
4.444	907	891	748	910	922	800	835	940	1002	965	906	884	1150	1072
4.448	901	868	777	851	865	789	890	849	1038	968	847	879	1098	1014
4.452	836	919	768	864	819	841	963	920	1009	909	827	838	1114	966
4.456	882	925	796	833	811	750	900	885	947	1002	848	827	1178	940
4.46	890	928	764	829	949	809	910	938	980	957	816	864	1113	945
4.464	888	878	839	802	849	842	911	916	957	902	908	822	1120	1012
4.468	865	915	823	828	824	826	867	887	1008	1010	871	851	1106	962
4.472	819	924	810	811	890	808	926	919	996	921	851	862	1092	941
4.476	867	897	746	894	896	816	851	911	972	1017	837	806	1058	951
4.48	865	903	853	837	896	783	915	864	1008	1016	814	809	1147	945
4.484	892	824	708	918	840	765	920	916	998	924	809	838	1048	957
4.488	889	845	844	856	876	833	916	840	953	972	842	852	1064	945
4.492	920	870	825	823	872	806	786	899	930	911	835	775	1056	951
4.496	901	881	786	866	871	719	871	830	981	980	836	842	1022	943
4.5	819	891	796	834	867	797	872	892	982	943	806	848	1125	1019
4.504	882	849	774	839	852	774	884	927	973	957	873	847	1169	903
4.508	860	834	802	815	846	777	895	863	908	943	860	852	1117	928
4.512	839	862	761	895	858	823	875	863	896	894	822	807	1139	897
4.516	818	843	798	852	891	750	888	831	975	956	811	828	1056	987
4.52	855	854	753	805	814	827	888	838	955	905	820	831	1136	929
4.524	836	899	722	826	802	803	856	820	914	929	831	846	1085	914
4.528	830	899	759	838	863	976	871	869	961	914	791	868	1061	929
4.532	890	897	795	834	858	1264	944	860	1013	947	818	862	1137	882
4.536	919	889	826	830	845	2513	1000	867	942	940	804	858	1102	914
4.54	846	884	813	871	840	5409	1330	805	961	985	847	785	1105	932
4.544	834	855	768	823	860	13704	2289	796	899	977	828	850	1043	958
4.548	795	876	766	812	830	29542	4569	991	911	1177	762	822	1054	951
4.552	862	836	782	844	900	54375	11903	1459	968	1608	820	791	1109	919
4.556	832	842	808	762	774	92129	27514	2798	935	2614	795	818	1010	876
4.56	882	880	786	787	883	135907	51099	5387	909	4402	884	845	1081	1002
4.564	857	838	798	816	888	190403	82686	12844	948	7368	856	825	1081	1007
4.568	841	836	751	832	815	246415	127239	27852	968	13936	794	894	1010	916
4.572	817	843	784	896	832	292822	187021	47797	969	21457	793	862	1040	917
4.576	866	886	796	833	854	274005	244227	71626	942	33896	871	824	1046	982
4.58	811	870	730	806	887	303143	292678	102474	895	43339	817	823	1045	914
4.584	820	889	700	883	851	411529	343589	137428	900	51010	833	833	999	905
4.588	821	907	737	817	855	445682	384513	170958	967	57582	859	878	1068	953
4.592	845	880	746	819	860	489191	421363	197738	939	60185	826	895	1033	921
4.596	851	940	726	907	942	519185	454747	211805	932	58930	876	846	1037	866
4.6	830	878	778	1066	860	540408	482147	208772	926	45315	838	850	1036	948
4.604	830	930	824	1190	817	555051	523439	190726	1078	39237	899	854	1062	940
4.608	790	823	828	1233	866	580703	543301	162697	1117	35740	799	948	1084	860
4.612	820	823	714	1237	852	596005	567317	122540	1122	26051	800	905	1632	993
4.616	853	837	849	1225	960	617105	592140	86488	1199	16411	818	868	1923	1010
4.62	875	840	809	1236	956	627950	605275	56875	1143	10982	837	1023	2005	906
4.624	833	806	888	1245	982	565588	621944	33058	1153	6519	855	881	2012	959
4.628	834	907	1010	1243	973	649184	632703	16429	1165	4872	807	979	2018	1045
4.633	849	786	1045	1199	970	655872	560206	10136	1165	3425	862	915	2027	979
4.636	830	890	1053	1220	968	670649	496166	5274	1220	2513	790	896	2037	932
4.64	840	897	1093	1240	928	677731	674721	3521	1118	2110	753	975	1994	1131
4.644	813	871	1100	1158	925	558545	681918	2496	1007	1755	858	979	2046	1300
4.648	910	901	1072	1137	926	656156	688107	1976	1083	1579	804	933	1935	1434
4.652	779	910	1072	1201	885	392507	1238224	1730	1089	1460	824	886	1981	1354
4.657	885	894	1049	1188	900	775480	1046265	1499	1042	1286	867	927	1985	1418
4.661	804	960	1037	1180	924	651707	314632	1370	991	1298	848	946	1896	1382
4.665	838	940	1043	1143	943	543761	700628	1264	1010	1229	863	889	1922	1381
4.668	891	924	1083	1114	908	101948	460345	1151	996	1168	871	894	1818	1323
4.673	918	893	1011	1101	948	604198	717986	1172	959	1137	827	867	1845	1333
4.676	880	969	1042	1148	882	303907	631897	1094	943	1115	892	882	1756	1349
4.68	858	898	1023	1040	899	693305	675907	1067	1014	1030	860	881	1689	1398
4.684	839	923	1079	1030	862	617093	58596	1069	976	1039	852	878	1747	1363
4.689	799	872	989	1099	890	477857	729763	905	942	1086	829	840	1598	1282
4.693	885	921	964	1057	885	733700	315759	933	952	999	874	912	1632	1261
4.697	868	913	997	1083	875	473254	410625	873	950	989	864	826	1581	1235
4.701	878	949	1047	1042	835	740031	739007	870	969	1024	833	875	1563	1243
4.705	809	949	1007	1128	918	744655	413886	928	939	1030	790	871	1536	1238
4.708	896	960	968	1066	856	451061	630816	869	997	930	893	891	1512	1135
4.712	855	1015	950	1014	858	312780	870475	894	941	985	822	778	1520	1174
4.717	835	1032	896	1026	809	494185	869737	858	933	911	829	907	1467	1148
4.721	855	985	962	963	861	747049	907747	895	1004	981	820	851	1521	1173
4.725	802	1011	908	990	846	719392	1037400	874	963	987	850	872	1411	1222
4.729	802	1022	907	1034	816	720742	657912	820	951	910	853	839	1507	1129
4.733	791	968	996	1029	852	749934	360844	882	923	955	769	855	1432	1190
4.737	815	895	944	998	945	704875	625509	829	917	1009	812	855	1427	1150
4.741	817	971	948	1008	943	103251	479245	835	961	942	822	831	1437	1201
4.745	798	988	901	983	923	103593	208170	869	927	1004	828	898	1438	1149
4.749	818	925	966	996	943	756953	5894	845	955	966	825	874	1404	1121
4.753	791	1018	914	984	980	768468	1938	872	999	990	786	840	1370	1169
4.757	811	1084	896	926	934	661743	1606	813	983	947	826	854	1344	1142
4.761	902	955	940	1048	938	509972	1319	854	919	943	784	839	1346	1182
4.765	897	1008	923	978	922	398788	1223	795	969	937	825	863	1359	1097
4.769	836	961	916	971	928	6853	1128	749	926	913	815	861	1336	1135
4.773	830	929	921	936	907	1939	1119	786	917	932	813	815	1383	1058
4.777	815	980	942	926	925	1375	1099	843	876	917	866	797	1311	1097
4.781	893	934	940	916	954	1279	1049	812	994	873	767	832	1325	1060
4.785	845	895	953	880	892	1123	1032	824	905	912	769	864	1271	1037
4.789	821	948	853	937	904	1047	960	814	921	950	810	859	1218	1062
4.793	902	935	921	884	947	1000	939	855	891	912	827	885	1268	1161
4.797	874	970	881	925	867	991	938	764	938	908	756	768	1246	1103
4.801	807	940	875	938	914	881	914	742	920	871	761	817	1226	1112
4.805	903	879	935	1053	910	955	879	820	914	979	847	888	1263	1150
4.809	917	991	948	974	865	865	880	835	977	925	802	829	1289	1135
4.813	890	986	925	932	900	814	883	835	878	1070	801	830	1214	1047
4.817	937	964	861	1002	954	830	850	897	993	1142	872	868	1275	1049
4.821	809	976	850	918	890	840	851	950	1105	1382	917	866	1233	1089
4.825	888	998	936	894	1089	795	832	934	1110	1585	883	857	1216	1075
4.829	881	1010	949	1002	1031	798	856	1151	1231	1843	833	865	1272	1178
4.833	879	939	942	975	983	838	788	1202	1485	2132	811	838	1299	1073
4.837	824	906	798	970	1114	726	833	1404	1698	2306	791	858	1232	1073
4.841	827	975	910	899	1072	807	817	1495	1812	2282	848	846	1274	1031
4.845	845	918	927	1003	1051	752	814	1619	1886	2372	867	841	1177	1129
4.849	919	875	915	939	1061	786	841	1611	1782	2480	899	814	1256	1096
4.853	906	901	869	905	1099	812	923	1509	1875	2351	874	853	1224	1022
4.857	854	902	893	928	1102	788	879	1465	1843	2037	799	883	1205	1026
4.861	916	917	816	902	1077	790	860	1451	1669	1933	851	890	1243	1081
4.865	823	884	859	861	983	800	968	1352	1525	1764	779	845	1192	1030
4.869	855	871	868	923	912	808	916	1196	1484	1603	822	831	1221	1021
4.873	802	899	819	906	951	795	894	1153	1382	1421	828	864	1188	958
4.877	830	910	916	914	918	752	877	1128	1387	1398	826	883	1164	982
4.881	860	953	849	914	945	796	839	981	1127	1238	801	875	1227	1054
4.885	886	888	875	879	913	678	782	883	1126	1145	815	845	1172	1020
4.889	796	903	831	845	919	712	734	924	1086	1089	817	818	1180	978
4.893	869	932	884	885	885	710	706	857	1071	1092	815	895	1203	979
4.897	816	916	865	864	838	635	762	869	1023	1131	834	834	1195	1019
4.901	888	859	865	881	851	674	780	819	983	985	778	771	1185	956
4.905	778	883	797	900	906	672	747	826	1033	996	805	809	1164	1003
4.909	865	846	817	916	875	657	717	838	981	1045	827	753	1102	977
4.913	860	872	843	913	861	610	689	791	949	958	797	839	1207	1079
4.917	888	851	800	886	886	575	718	740	990	1006	805	888	1075	939
4.921	849	934	842	878	869	638	666	773	886	918	860	848	1169	961
4.925	813	820	870	834	823	649	668	821	909	961	861	845	1127	956
4.929	817	850	774	840	819	622	666	817	900	901	799	928	1143	912
4.933	827	866	814	880	899	655	671	830	918	931	796	843	1118	924
4.937	818	843	816	902	900	636	704	845	913	977	837	903	1091	882
4.941	894	876	812	949	822	600	681	754	911	930	827	818	1108	947
4.945	838	866	817	931	838	600	686	779	916	953	742	821	1067	1001
4.949	801	835	848	955	830	668	704	799	933	864	814	862	1145	961
4.953	811	835	826	910	835	678	677	777	911	948	852	849	1147	994
4.957	885	820	918	901	850	619	674	771	899	905	776	840	1094	949
4.961	817	841	854	860	904	617	723	755	914	921	841	840	1105	976
4.965	858	876	832	969	854	606	677	777	876	933	804	909	1112	957
4.969	815	881	811	956	914	579	673	807	882	887	787	846	1038	950
4.973	790	875	805	946	846	621	630	832	890	879	835	887	1113	949
4.977	849	835	855	927	810	586	717	786	953	935	806	853	1085	920
4.981	807	846	855	945	891	543	639	731	931	881	750	819	1071	991
4.985	781	918	893	949	846	592	707	796	918	918	809	840	1191	973
4.989	872	834	846	957	876	630	637	758	873	906	809	832	1112	917
4.993	777	850	849	957	880	562	702	781	884	915	797	824	1040	896
4.997	833	828	898	983	826	606	723	756	979	923	817	876	1073	959
5.001	844	848	851	946	884	618	651	809	1041	954	758	798	1082	892
5.005	813	913	915	963	888	591	663	949	1222	1070	803	846	1049	933
5.009	756	878	902	992	1054	626	687	1137	1419	1256	797	868	1101	927
5.013	833	880	913	910	1191	606	715	1440	1904	1489	821	824	1146	887
5.017	834	833	908	929	1371	590	677	2110	2623	1768	806	823	1070	855
5.021	832	758	830	988	1824	610	699	2822	3540	2122	845	893	1110	859
5.025	823	809	890	908	2241	568	749	3728	4430	2550	750	899	1009	889
5.029	822	870	871	890	2804	637	892	4651	5506	2975	782	876	1107	1001
5.033	862	891	835	924	3296	522	1071	5414	6387	3184	742	870	1062	913
5.037	805	818	925	930	3634	571	1201	5855	6773	3385	798	885	1041	934
5.041	798	916	880	919	3850	578	1525	6060	6773	3461	788	863	1071	947
5.045	784	837	822	903	3836	604	1738	5881	6866	3269	803	876	1103	914
5.049	788	835	871	968	3647	565	1958	5294	6224	3124	764	840	1033	944
5.053	748	841	886	933	3248	584	2092	4777	5358	2659	796	862	1034	983
5.057	826	856	845	938	2821	597	2188	3908	4551	2421	786	846	1115	968
5.061	819	808	827	913	2486	582	2031	3237	3772	2068	814	848	981	915
5.065	778	910	886	913	2146	576	1865	2566	2983	1721	771	870	1116	963
5.069	816	866	847	940	1735	577	1721	2176	2407	1515	826	821	1099	932
5.073	828	870	882	893	1489	606	1522	1701	2023	1324	777	727	1126	949
5.077	818	876	873	886	1303	581	1347	1416	1697	1197	772	803	1117	949
5.081	811	840	888	911	1203	584	1021	1223	1482	1110	791	853	1144	931
5.085	851	830	916	895	1148	576	918	1170	1357	1146	794	843	1105	922
5.089	794	898	815	885	1007	597	843	1022	1184	1114	769	795	1019	997
5.093	795	881	839	926	927	542	797	908	1090	996	788	827	1099	951
5.097	834	912	800	857	954	584	734	992	1055	994	797	778	1072	943
5.101	801	838	843	902	977	562	759	871	1124	976	798	832	1073	941
5.105	771	882	860	858	948	666	759	912	1112	953	806	840	1110	983
5.109	857	877	864	934	897	634	672	812	1029	966	735	825	1102	952
5.113	801	845	852	847	843	599	674	897	1082	866	788	879	1125	988
5.117	797	867	874	873	886	589	701	774	1137	893	768	880	1118	1049
5.121	778	834	844	921	843	549	740	885	1146	1000	863	805	1140	1007
5.125	784	910	815	846	883	568	694	828	1201	969	780	821	1108	1016
5.129	846	868	856	917	879	603	702	828	1205	915	835	823	1110	1046
5.133	786	906	832	862	931	533	686	827	1203	964	885	809	1148	1069
5.137	822	939	856	816	800	562	725	855	1208	997	846	865	1103	1081
5.141	842	918	886	905	927	642	668	902	1239	984	798	814	1137	1074
5.145	796	893	865	857	928	604	742	955	1226	1101	856	834	1047	1104
5.149	842	888	845	906	855	606	700	925	1220	1093	876	805	1096	1102
5.153	809	912	862	983	919	587	729	1044	1265	1135	967	818	1179	1129
5.157	880	845	850	884	874	635	695	1046	1214	1208	1201	767	1085	1082
5.161	833	924	898	925	883	574	722	1123	1243	1187	1495	769	1122	1032
5.165	833	886	810	802	858	594	740	1159	1249	1226	1599	845	1132	1111
5.169	832	935	871	915	884	610	693	1175	1289	1203	1696	812	1105	1065
5.173	837	895	802	856	995	581	705	1170	1459	1210	1806	837	1076	1000
5.177	839	870	880	847	1081	603	743	1335	1565	1364	1853	891	1100	1029
5.181	797	962	809	883	1206	585	756	1544	1881	1445	1746	828	1064	1089
5.185	868	933	841	887	1334	601	751	1828	2092	1523	1704	912	1050	988
5.189	786	871	800	839	1552	603	815	2068	2441	1821	1623	868	1076	1051
5.193	855	952	806	922	1683	568	915	2302	2671	1865	1580	862	1091	1078
5.197	799	846	831	865	1795	620	1018	2447	2825	1981	1480	855	1101	1053
5.201	885	932	853	891	1867	653	1076	2594	2794	1915	1452	886	1081	1179
5.205	775	947	864	905	1828	637	1077	2465	2733	1982	1433	807	1098	1089
5.209	813	880	866	910	1860	568	1214	2327	2614	1790	1406	842	1002	1071
5.213	875	909	908	949	1686	627	1244	2169	2313	1754	1254	810	1069	1095
5.217	824	899	814	885	1622	629	1155	1995	2120	1618	1282	851	1069	1067
5.221	824	901	831	901	1438	619	1130	1721	1797	1531	1360	853	1037	1064
5.225	884	799	828	910	1320	648	1030	1544	1638	1416	1317	903	1027	1006
5.229	853	857	803	928	1269	646	979	1301	1557	1268	1261	834	952	980
5.233	856	859	839	845	1160	588	870	1216	1385	1333	1219	873	1052	978
5.237	784	874	874	884	1086	624	859	1146	1282	1128	1154	857	1059	920
5.241	848	902	870	825	1013	591	816	1120	1196	1097	1251	805	994	954
5.245	811	860	821	864	999	610	774	973	1162	912	1171	889	1014	941
5.249	859	875	848	825	979	581	818	1006	1040	1048	1090	806	1058	950
5.253	774	811	796	859	942	588	783	984	1031	947	1123	790	1048	980
5.257	843	825	797	829	940	575	682	884	1038	1029	1057	856	1051	904
5.261	831	864	861	821	851	584	736	890	989	998	1037	814	1004	989
5.265	801	876	793	878	902	577	750	862	984	895	1020	836	989	969
5.269	863	876	751	804	869	578	721	831	940	956	983	777	966	969
5.273	776	888	776	798	839	582	710	835	968	916	893	850	972	919
5.277	832	840	862	767	833	610	683	838	925	944	977	880	967	922
5.281	799	906	689	870	886	629	689	840	887	873	985	783	1006	863
5.285	758	792	781	822	876	556	719	819	938	919	902	796	1042	885
5.289	824	868	768	830	831	597	715	762	983	891	913	890	963	915
5.293	838	873	773	823	886	625	699	789	937	900	920	823	962	900
5.297	826	795	780	755	810	600	693	777	938	853	925	788	994	867
5.301	774	835	768	857	839	577	698	787	889	961	879	860	979	907
5.305	782	861	778	830	789	576	682	826	897	848	885	856	973	875
5.309	824	900	783	817	856	574	708	776	906	911	824	835	912	831
5.313	771	834	735	810	895	613	716	796	900	837	926	804	1096	996
5.317	788	873	789	847	831	577	693	811	941	875	851	879	974	874
5.321	771	843	776	845	888	623	714	789	963	860	839	881	989	902
5.325	828	879	791	823	808	607	704	775	895	840	840	800	966	895
5.329	768	810	791	800	860	540	645	750	902	854	895	820	1004	896
5.333	807	826	763	765	859	620	653	798	818	880	827	809	978	952
5.337	746	814	814	818	815	788	780	738	893	875	810	796	976	889
5.341	786	864	749	788	843	1138	957	734	915	870	830	887	990	849
5.345	821	821	748	794	825	1965	1376	792	850	903	817	782	1000	860
5.349	817	814	793	854	846	3880	2639	773	827	880	795	795	956	859
5.353	781	840	741	871	888	7098	4996	926	940	890	883	856	998	874
5.357	759	856	811	835	848	15788	11798	1157	919	989	838	768	1051	888
5.361	824	839	765	823	842	34201	19869	1435	924	1076	797	826	949	850
5.365	722	812	808	895	804	54156	39116	1896	829	1180	750	842	1034	856
5.369	747	845	732	853	874	78202	59270	2451	915	1375	802	831	966	841
5.373	787	797	811	833	851	105233	84186	3075	877	1474	848	818	1010	891
5.377	736	830	758	828	871	138830	114812	3580	900	1673	837	821	1011	832
5.381	792	810	733	802	765	170553	144763	4065	883	1778	795	819	1014	929
5.385	794	840	707	799	859	205698	176075	4154	886	1783	792	818	1004	944
5.389	763	798	783	853	788	236399	206699	4207	930	1869	882	802	1054	927
5.393	794	831	707	815	823	259510	231008	4047	881	1749	841	843	984	845
5.397	778	829	754	792	753	279947	250258	3666	900	1782	838	819	911	879
5.401	811	768	767	849	839	292819	256709	3189	894	1584	784	779	941	873
5.405	785	822	789	766	803	299600	251112	2697	906	1488	808	795	977	864
5.409	759	810	754	803	766	296090	232546	2271	848	1341	769	795	990	882
5.413	781	804	784	802	773	273793	193680	1870	870	1284	854	811	888	824
5.417	750	842	732	855	781	231845	145485	1641	948	1137	781	813	937	881
5.421	738	871	737	825	818	171164	96807	1308	897	1087	757	802	981	878
5.425	847	797	795	800	787	107241	57920	1177	882	1029	868	774	1000	868
5.429	721	890	718	852	807	59894	33133	1044	904	983	799	811	1039	848
5.433	855	868	758	818	763	28874	14582	992	870	894	765	803	954	786
5.437	819	810	733	803	764	12570	6283	969	858	947	815	793	1018	846
5.441	883	911	732	787	835	5410	3721	864	935	1016	769	850	965	828
5.445	738	797	799	811	810	3239	2552	841	943	860	818	761	952	866
5.449	781	797	817	767	821	2113	1827	791	887	917	792	823	976	880
5.453	783	810	768	845	741	1559	1466	834	874	905	752	820	893	910
5.457	794	809	744	764	813	1352	1219	789	875	903	825	800	939	837
5.461	795	861	748	798	793	1156	1109	775	890	855	838	809	976	876
5.465	833	956	719	839	793	1040	1050	787	895	867	806	773	980	885
5.469	833	857	803	782	852	1006	959	837	939	869	777	840	954	847
5.473	806	820	784	728	866	934	872	945	1251	998	802	790	960	914
5.477	772	811	771	760	1069	916	938	1424	2086	1247	757	785	960	883
5.481	734	811	763	789	1422	818	1025	2616	3590	2206	799	805	994	843
5.485	762	847	740	789	2109	837	1163	4693	6607	3328	751	872	956	865
5.489	796	792	741	817	3355	834	1493	8727	10583	5075	785	888	975	806
5.493	792	784	701	761	4925	836	1973	13370	16078	8017	778	800	956	873
5.497	748	827	767	799	8170	736	2660	17775	20853	10667	862	822	866	822
5.501	741	833	711	775	10598	735	3672	21922	24695	13138	796	831	947	907
5.505	782	809	774	782	12874	778	4703	25578	27822	14915	782	774	907	888
5.509	726	806	743	784	14715	667	5731	27414	29097	15485	784	788	973	862
5.513	775	845	748	741	14875	724	9178	27376	29441	15644	772	788	929	856
5.517	740	873	716	807	13945	736	9720	25258	28015	15101	788	834	931	852
5.521	755	799	754	764	13516	698	9302	21877	24381	13240	751	813	907	851
5.525	758	811	776	740	12476	690	8793	19217	20991	10603	780	779	948	838
5.529	815	817	726	734	10640	692	7670	16160	16786	9224	782	792	964	872
5.533	783	820	727	832	9117	690	5322	11725	13024	7788	806	794	898	878
5.537	778	773	771	766	7072	667	4426	9195	9814	6362	771	894	954	823
5.541	798	871	730	823	4817	682	3726	7462	7688	4307	753	820	969	837
5.545	774	773	712	814	3963	662	2988	4892	5460	3688	720	866	939	842
5.549	825	817	733	797	3219	581	2387	3969	4273	3055	779	827	942	850
5.553	815	801	706	753	2659	630	1925	3159	3417	2611	775	841	960	864
5.557	772	789	702	776	2125	618	1676	2658	2768	2195	808	833	963	803
5.561	736	802	709	719	1885	688	1356	2201	2483	1937	804	818	905	846
5.565	772	854	756	792	1678	634	1247	1861	2164	1784	743	786	902	902
5.569	771	753	700	725	1483	646	1191	1813	1842	1667	755	839	927	870
5.573	772	798	698	754	1376	660	1014	1571	1651	1495	815	867	960	857
5.577	798	809	683	729	1352	617	981	1366	1544	1383	794	821	904	840
5.581	716	743	692	782	1218	629	837	1318	1474	1293	790	828	972	858
5.585	738	793	668	805	1143	636	941	1255	1342	1290	753	793	927	850
5.589	756	764	705	811	1099	651	833	1146	1374	1230	779	833	923	827
5.593	730	820	744	779	1050	629	811	1146	1231	1149	780	757	876	843
5.597	781	800	728	716	1003	680	760	1119	1251	1085	746	848	960	834
5.601	804	751	746	742	1054	576	791	1032	1130	1095	741	827	928	843
5.605	710	796	672	779	973	655	741	1033	1102	1025	761	779	888	826
5.609	764	763	680	748	953	641	746	1003	1155	1090	778	799	932	839
5.613	819	808	735	709	891	604	768	941	1096	1021	745	870	933	786
5.617	752	759	710	739	936	659	795	928	1144	947	807	786	961	889
5.621	806	797	733	797	899	587	732	926	1035	1056	784	826	896	862
5.625	787	809	689	828	895	577	771	921	1015	1004	796	783	905	767
5.629	773	772	660	798	891	646	739	912	1071	979	781	726	883	831
5.633	791	814	706	798	896	616	747	888	1021	940	761	757	861	810
5.637	769	783	770	811	858	593	679	887	1060	884	780	790	949	839
5.641	769	802	703	730	863	595	766	923	1033	941	787	831	925	835
5.645	806	765	759	722	831	649	670	837	1016	971	796	786	909	814
5.649	756	710	694	773	908	596	719	837	1077	962	766	766	923	837
5.653	783	827	736	767	899	569	689	844	1083	931	818	792	925	877
5.657	746	845	639	731	816	640	690	868	1048	889	813	723	933	814
5.661	734	786	698	799	860	582	703	770	975	837	748	800	944	814
5.665	744	782	692	742	869	561	703	879	1083	855	794	780	976	868
5.669	778	755	675	726	869	629	698	846	1136	899	815	817	877	878
5.673	789	748	725	753	879	634	691	873	1233	938	762	798	1038	793
5.677	774	748	716	737	875	589	712	866	1391	944	836	819	939	860
5.681	737	778	662	770	891	556	681	1119	1674	1000	732	851	1029	857
5.685	727	819	692	742	934	566	733	1269	2013	1117	737	769	998	805
5.689	741	810	674	716	1117	590	780	1630	2428	1373	799	757	1004	799
5.693	715	811	727	744	1308	596	801	1918	2667	1503	770	864	1145	776
5.697	751	847	701	746	1436	572	850	2321	3009	1645	732	849	1204	833
5.701	682	840	704	791	1520	606	932	2356	2999	1800	826	767	1292	833
5.705	713	811	742	710	1609	627	1068	2419	3041	1817	701	794	1357	820
5.709	816	827	704	755	1692	610	1136	2449	2955	1957	754	796	1393	780
5.713	715	863	685	688	1641	568	1135	2358	2824	1923	775	801	1412	819
5.717	749	927	761	743	1611	583	1135	2279	2651	1803	750	773	1458	854
5.721	786	863	675	811	1598	596	1136	2066	2580	1787	854	762	1330	828
5.725	702	885	736	756	1446	576	1147	1877	2240	1613	932	788	1309	845
5.729	756	828	660	722	1366	584	1039	1799	2045	1620	1009	779	1355	909
5.733	841	851	713	729	1325	626	981	1535	1801	1486	1094	831	1265	880
5.737	717	858	720	732	1288	592	932	1403	1676	1375	1135	765	1234	814
5.741	784	898	708	741	1161	620	952	1342	1566	1321	1224	742	1168	812
5.745	789	842	675	736	1117	635	851	1267	1470	1262	1125	801	1170	821
5.749	778	909	740	736	1101	574	842	1155	1352	1163	1125	799	1051	878
5.753	748	869	715	792	999	600	874	1158	1331	1236	1135	751	1082	846
5.757	756	861	811	762	1025	606	803	1110	1254	1209	1156	821	1138	952
5.761	804	903	924	806	1038	590	764	1146	1349	1226	1157	807	1169	948
5.765	876	1011	1026	863	1121	696	820	1163	1456	1405	1205	803	1315	1072
5.769	894	1149	1271	890	1256	730	907	1286	1500	1717	1322	866	1514	1198
5.773	1144	1389	1658	1133	1529	805	1054	1500	1972	2014	1445	850	1857	1445
5.777	1345	1849	2145	1331	1984	1069	1402	1888	2418	2437	1699	838	2292	1878
5.781	1669	2464	2872	1861	2492	1378	1669	2443	3243	3265	1997	900	2981	2478
5.785	2373	3333	3907	2353	3346	1842	2335	3183	4418	4199	2503	927	4004	3314
5.789	3051	4273	4871	3177	4351	2582	3261	4098	5873	5305	3182	955	5144	4280
5.793	4088	5941	5946	4053	5486	3448	4342	5095	7252	6879	3970	982	6847	5309
5.797	5198	7265	7462	5153	6910	4487	6652	6326	8556	8217	4590	1137	8264	6630
5.801	6020	8789	8797	6159	8493	6446	8305	7145	10101	9454	5606	1140	9363	7583
5.805	7460	9633	8875	7211	9631	7602	8007	8257	11063	9861	5978	1289	10044	8232
5.809	8727	10700	9319	7838	10158	9157	10199	8895	11807	10039	6299	1330	10500	9264
5.813	9377	11503	9726	8292	10857	9967	11273	8463	11675	9483	6356	1375	10641	9095
5.817	9202	10614	9157	8575	10836	9975	12172	7941	10962	8743	6446	1365	10475	8531
5.821	8813	9853	8265	8266	9892	9347	11093	7561	9921	7928	5851	1401	9177	7533
5.825	8117	8899	6790	7558	8604	8770	9544	6267	7975	6602	5081	1350	7585	6743
5.829	7325	7487	5635	6966	7217	7809	8384	5358	6549	5285	4488	1250	6429	5790
5.833	6320	6171	4833	5812	6078	6303	7241	4287	5628	4188	3873	1124	4769	4570
5.837	5063	5005	3893	4873	4718	4325	4477	3416	3991	3122	3272	1103	3825	3684
5.841	4241	3869	3179	3908	3748	3335	3307	2530	3145	2547	2649	1079	2950	2987
5.845	3483	2931	2544	3252	2772	2551	2625	2069	2460	1969	2129	1075	2359	2469
5.849	2741	2452	2134	2579	2145	1960	2056	1614	1971	1698	1856	997	1815	2192
5.853	2105	1880	1803	2080	1839	1606	1634	1415	1684	1438	1662	972	1661	1700
5.857	1807	1535	1552	1788	1545	1309	1412	1152	1413	1255	1507	1004	1414	1568
5.861	1482	1311	1382	1542	1337	1159	1166	1078	1297	1174	1296	930	1253	1443
5.865	1310	1217	1314	1366	1250	1067	1020	1028	1211	1091	1278	885	1232	1288
5.869	1199	1145	1228	1306	1065	971	981	1048	1053	1084	1228	924	1183	1287
5.873	1226	1120	1159	1160	1028	896	940	952	1114	1072	1190	937	1132	1180
5.877	1141	994	1154	1209	1011	861	947	907	1058	983	1153	832	1098	1168
5.881	1039	959	1075	1139	1006	898	856	971	1073	986	1060	921	1017	1151
5.885	982	947	1060	1074	958	820	870	879	1036	996	1039	869	1081	1142
5.889	943	955	1035	1044	975	831	871	891	998	951	1077	848	1055	1094
5.893	961	916	1000	1026	985	813	862	901	1058	948	972	863	1036	1074
5.897	934	916	998	1090	974	795	874	839	984	965	985	835	1086	1052
5.901	867	884	945	1034	919	777	811	821	985	988	1020	832	1056	1073
5.905	901	910	964	947	851	802	840	871	932	999	975	873	982	1075
5.909	890	870	900	934	844	746	822	821	872	931	1020	902	1043	1027
5.913	864	861	926	963	966	760	786	815	955	912	985	902	982	995
5.917	861	881	873	961	846	696	806	871	974	1024	982	890	1013	954
5.921	878	924	923	884	880	701	825	820	930	915	942	949	1027	971
5.925	843	936	938	863	855	721	832	826	1000	878	972	846	978	950
5.929	860	794	871	906	808	691	758	827	975	891	926	872	1019	959
5.933	882	903	884	853	833	767	832	857	976	928	932	867	1020	962
5.937	873	877	812	835	838	666	745	776	918	958	880	871	1042	822
5.941	830	875	870	862	859	687	833	775	927	925	974	843	983	971
5.945	773	810	886	824	850	677	793	871	963	904	831	806	1047	952
5.949	877	872	858	879	867	644	792	829	910	925	920	846	1019	902
5.953	855	857	807	831	842	651	771	821	915	923	883	816	1043	927
5.957	807	817	786	787	831	702	731	775	925	866	857	862	1026	870
5.961	808	870	837	801	838	697	812	824	942	898	905	858	999	899
5.965	804	862	809	805	816	592	799	776	908	883	861	797	969	873
5.969	850	852	757	882	780	645	770	810	1015	918	858	871	938	892
5.973	809	818	797	829	800	678	802	804	920	873	842	777	1058	856
5.977	841	844	713	828	821	636	826	795	886	927	851	766	932	904
5.981	846	789	795	816	841	671	754	793	898	850	823	810	1051	901
5.985	778	834	751	774	798	654	733	762	887	924	806	774	1009	846
5.989	837	869	780	761	824	660	735	809	927	917	880	860	1009	924
5.993	844	778	774	791	775	613	691	809	877	853	875	813	960	868
5.997	832	877	807	756	828	625	784	820	866	850	779	813	954	861
6.001	761	854	764	815	845	614	750	834	915	819	800	886	1000	877
6.005	743	839	778	825	759	641	743	809	883	876	809	825	949	909
6.009	794	839	769	806	831	656	704	782	907	894	841	840	909	924
6.013	826	777	755	789	815	634	701	813	869	839	824	863	1010	818
6.017	748	797	771	838	753	658	755	826	942	893	859	830	941	844
6.021	760	794	727	764	771	632	781	746	899	845	853	827	925	848
6.025	821	854	781	761	830	662	688	755	857	888	797	879	968	913
6.029	810	796	814	808	794	614	704	804	881	852	802	838	988	852
6.033	780	815	734	756	748	641	755	758	909	878	791	791	962	820
6.037	811	809	788	740	771	653	733	793	872	903	819	826	941	844
6.041	780	804	751	724	819	687	726	776	924	786	846	829	961	906
6.045	743	797	774	754	800	655	758	780	861	866	825	832	955	887
6.049	805	788	711	810	823	614	700	829	934	873	815	837	923	821
6.053	749	757	744	726	785	658	740	772	824	830	775	811	954	868
6.057	758	750	749	765	794	617	715	769	865	872	792	788	933	898
6.061	815	801	676	787	776	642	719	729	923	857	713	839	958	857
6.065	775	802	716	756	817	634	712	793	899	845	794	822	871	851
6.069	784	782	738	719	802	643	702	789	868	898	824	833	1004	837
6.073	758	809	684	762	812	619	723	712	850	810	770	798	906	808
6.077	766	787	756	730	815	625	735	763	811	866	801	784	933	842
6.081	761	795	702	746	779	610	713	738	872	906	814	801	915	861
6.085	740	807	798	714	777	645	675	740	798	863	778	824	925	813
6.089	812	841	693	804	712	646	721	781	866	796	807	802	986	844
6.093	756	760	763	811	773	639	755	777	852	824	771	835	866	810
6.097	790	810	713	797	763	651	696	749	847	931	792	828	909	872
6.101	728	824	757	787	754	649	707	706	834	913	764	863	880	877
6.105	711	797	780	771	758	651	677	771	935	816	757	757	942	837
6.109	764	792	730	780	786	587	650	727	835	775	818	767	896	907
6.113	761	790	772	767	773	664	695	761	860	854	733	842	927	809
6.117	778	744	760	719	757	593	689	771	874	884	779	785	860	861
6.121	772	752	720	760	825	633	670	788	889	885	785	760	950	882
6.125	769	793	727	769	767	685	718	769	880	840	848	790	872	865
6.129	782	756	686	771	731	631	687	720	859	921	806	817	880	815
6.133	803	780	708	790	768	613	657	739	889	832	816	795	961	858
6.137	764	786	745	797	776	655	693	793	872	799	830	874	914	816
6.141	727	729	776	742	787	572	709	684	853	854	773	787	928	835
6.145	837	798	747	771	728	582	748	766	829	837	816	751	935	844
6.149	841	777	736	711	726	578	727	771	862	869	805	817	926	828
6.153	811	781	732	725	741	607	686	730	852	928	773	809	877	830
6.157	787	790	716	733	732	649	727	813	876	863	781	801	873	787
6.161	791	823	688	724	766	618	669	781	886	838	773	815	869	833
6.165	734	775	781	801	806	598	753	800	858	823	742	800	907	820
6.169	764	755	735	705	797	568	720	742	862	843	774	785	901	726
6.173	714	758	696	763	735	681	662	746	878	891	777	784	898	803
6.177	771	751	719	747	803	629	693	705	889	831	770	813	1020	787
6.181	780	795	666	795	801	630	721	795	869	805	750	783	954	787
6.185	764	794	739	722	765	613	643	726	866	804	809	809	864	785
6.189	748	772	711	736	786	627	691	767	880	873	845	847	864	857
6.193	769	745	733	735	755	598	752	775	903	804	772	790	862	854
6.197	821	741	705	773	757	594	647	773	901	858	856	792	890	822
6.201	765	764	684	696	776	669	709	765	853	817	814	768	886	825
6.205	740	776	680	755	792	628	650	697	798	845	777	855	896	805
6.209	748	745	746	734	724	616	696	757	888	851	760	792	914	842
6.213	704	775	716	810	765	604	668	748	858	851	798	780	915	788
6.217	755	806	734	740	748	617	676	757	797	829	845	818	952	828
6.221	796	762	627	762	768	562	678	761	831	854	797	770	920	803
6.225	700	835	682	810	820	594	663	751	935	843	806	751	853	773
6.229	797	746	691	680	749	675	728	713	901	807	770	772	947	826
6.233	740	735	736	764	777	565	648	726	876	859	812	799	935	907
6.237	778	728	728	777	786	568	742	702	846	782	806	742	884	883
6.241	744	774	732	687	760	607	729	786	872	827	847	785	934	811
6.245	776	791	698	731	772	556	710	783	818	867	801	783	907	855
6.249	745	790	687	807	811	632	681	788	831	863	823	817	937	854
6.253	722	698	714	720	703	623	645	793	868	864	823	765	973	849
6.257	737	727	691	731	785	596	691	773	863	817	810	788	899	825
6.261	751	777	684	794	780	661	673	743	901	882	859	754	853	853
6.265	763	724	694	741	710	591	688	766	869	839	801	823	909	828
6.269	770	784	694	803	769	596	664	734	791	816	864	812	969	795
6.273	738	781	662	738	742	618	687	809	882	889	780	801	917	849
6.277	780	705	705	689	736	627	691	758	871	830	832	816	935	817
6.281	769	764	639	755	759	613	664	743	891	781	812	759	848	816
6.285	739	723	672	687	767	652	721	764	914	861	848	810	916	780
6.289	812	750	698	759	765	631	709	727	866	864	775	741	904	840
6.293	741	750	696	709	811	614	678	740	890	905	898	771	925	797
6.297	738	748	690	799	736	666	628	793	881	828	8863	761	944	859
6.301	700	742	654	756	800	657	726	926	937	2561	14255	735	849	821
6.305	698	775	745	729	742	585	683	3852	924	5534	17499	797	895	805
6.309	754	758	686	683	782	643	703	6481	1042	8205	20002	818	902	850
6.313	781	751	678	715	753	635	703	8196	3216	9400	20239	797	880	821
6.317	763	785	667	705	761	552	685	9476	4740	10522	20053	816	887	873
6.321	691	808	706	661	760	619	684	9965	5692	11117	19304	776	842	775
6.325	730	744	717	731	795	597	689	9767	6917	10960	18173	809	885	833
6.329	749	777	724	667	728	598	686	9546	7311	10735	17129	754	872	792
6.333	705	799	687	736	749	592	707	9099	7103	10009	15657	843	917	868
6.337	705	731	695	696	775	648	734	7989	6751	9411	14086	757	851	812
6.341	795	762	714	688	738	614	723	7269	6314	8925	13065	763	969	751
6.345	787	818	703	733	754	578	701	7083	6097	7913	12336	853	896	850
6.349	728	823	693	732	734	620	706	6639	5727	6657	11307	777	894	838
6.353	764	825	713	694	790	597	712	5777	5196	6022	10321	738	858	803
6.357	758	824	686	719	759	618	682	5215	4874	5415	9355	818	927	793
6.361	730	781	745	732	751	656	718	4781	4462	5102	8503	842	886	746
6.365	762	763	717	741	820	623	736	4380	4128	4753	7935	830	933	840
6.369	745	710	650	698	716	631	672	3966	3793	4315	7652	777	857	766
6.373	723	776	667	740	723	641	648	3635	3501	4106	7233	834	928	819
6.377	720	760	739	679	711	626	693	3484	3329	3637	6299	845	846	781
6.381	785	735	752	710	692	663	698	3181	3001	3311	5781	780	907	803
6.385	721	745	706	722	751	600	676	3053	2922	3208	5494	787	888	842
6.389	734	795	729	756	748	645	696	2791	2757	3008	5369	774	862	882
6.393	721	731	687	737	758	608	744	2594	2605	2880	5025	769	866	770
6.397	700	806	692	753	767	616	679	2499	2447	2701	4900	817	849	798
6.401	780	668	689	716	728	583	680	2326	2348	2611	4540	835	792	808
6.405	702	756	640	713	706	606	729	2319	2285	2463	4499	765	875	851
6.41	767	766	714	696	715	618	705	2115	2085	2379	4312	803	900	801
6.413	773	782	743	735	717	591	629	2087	1924	2303	3972	790	889	821
6.417	769	735	697	718	721	658	700	2044	1993	2140	3836	712	924	817
6.421	726	776	651	680	796	623	731	1925	1857	2109	3654	801	1009	778
6.425	823	766	671	735	685	630	690	1856	1823	2017	3524	779	900	824
6.429	739	782	668	706	799	618	635	1892	1812	1919	3464	756	885	742
6.433	744	756	724	763	762	648	729	1717	1729	1890	3277	774	866	840
6.437	742	743	715	741	741	659	672	1760	1758	1827	3227	775	882	791
6.441	681	765	720	750	773	614	673	1596	1621	1788	2936	811	858	792
6.445	732	742	726	695	723	593	687	1521	1599	1659	2995	794	906	823
6.449	810	769	670	691	803	607	669	1522	1518	1694	2883	787	926	762
6.453	728	840	705	730	770	648	725	1509	1538	1639	2777	777	876	804
6.457	733	813	621	742	769	603	713	1510	1535	1695	2694	753	923	782
6.461	725	705	628	758	815	619	690	1450	1393	1567	2494	753	915	799
6.465	761	736	674	733	753	598	698	1401	1409	1560	2518	771	890	798
6.469	798	728	709	747	809	644	682	1375	1323	1444	2533	766	869	843
6.474	717	760	647	801	774	657	676	1300	1365	1453	2332	827	890	806
6.478	770	780	661	707	814	662	664	1312	1330	1416	2355	702	910	812
6.482	698	773	649	726	745	618	732	1205	1364	1403	2271	803	915	799
6.485	740	804	686	728	758	592	696	1310	1238	1434	2186	810	868	782
6.489	744	747	676	684	754	612	655	1237	1278	1352	2185	801	792	832
6.493	773	785	682	684	734	647	710	1256	1268	1344	2084	822	929	835
6.497	741	730	707	767	751	601	729	1227	1221	1282	1947	811	914	847
6.501	760	766	708	689	748	604	682	1251	1199	1350	1980	794	863	845
6.506	806	773	698	711	731	639	684	1211	1216	1289	2016	821	809	820
6.51	744	738	694	723	787	582	737	1230	1240	1382	1928	795	889	825
6.514	752	747	686	697	740	594	660	1176	1302	1381	1865	763	875	858
6.517	724	792	671	716	753	594	711	1225	1348	1424	1864	757	870	777
6.522	767	813	702	792	753	632	665	1255	1379	1313	1809	812	912	842
6.525	724	756	709	737	733	617	662	1300	1417	1366	1790	773	940	759
6.529	764	752	645	751	797	659	727	1340	1472	1431	1814	822	881	809
6.533	707	736	714	730	725	597	728	1390	1508	1436	1768	798	929	816
6.537	792	694	640	694	752	602	744	1373	1447	1472	1759	709	880	778
6.542	729	713	744	740	726	657	711	1431	1535	1457	1611	832	832	796
6.546	715	670	703	721	757	618	722	1325	1567	1432	1646	832	937	794
6.55	745	697	734	714	770	558	684	1447	1452	1346	1662	782	911	795
6.554	715	803	686	739	720	629	709	1318	1418	1402	1636	761	865	829
6.557	717	754	669	713	752	601	713	1311	1336	1321	1568	838	911	861
6.561	706	760	664	697	734	643	677	1264	1315	1306	1601	781	937	816
6.565	714	727	687	803	744	606	721	1196	1268	1184	1552	761	912	830
6.569	698	742	662	708	783	575	673	1178	1246	1141	1553	772	948	819
6.573	677	803	699	749	738	648	735	1094	1203	1204	1498	758	880	820
6.577	761	765	716	728	742	626	751	1075	1115	1122	1471	790	919	811
6.582	737	779	650	709	738	619	737	1109	1164	1133	1493	803	905	849
6.586	767	813	734	696	794	579	691	991	1092	1079	1491	800	979	850
6.59	776	787	656	726	786	594	657	987	1025	1129	1374	788	930	834
6.594	764	822	693	786	748	635	651	953	997	1074	1476	766	947	854
6.597	734	760	708	741	787	590	666	981	1032	1057	1385	782	892	875
6.601	727	772	747	742	802	574	711	1024	1067	1112	1352	765	968	846
6.605	671	796	741	722	738	655	685	956	983	1042	1445	730	929	842
6.609	729	746	717	797	794	592	749	900	961	1024	1376	793	897	877
6.614	703	794	731	699	757	636	716	950	1041	1020	1376	809	900	761
6.618	717	728	652	743	773	611	684	935	1062	1039	1392	831	902	784
6.622	818	733	701	682	767	568	737	901	1015	1085	1291	807	902	849
6.625	743	810	684	775	780	570	727	926	977	991	1370	822	853	781
6.629	787	711	650	742	745	616	687	908	1021	970	1310	734	928	859
6.634	730	764	720	794	731	607	713	896	1009	1048	1237	788	869	815
6.637	711	755	677	740	742	649	668	850	952	1004	1274	761	924	789
6.641	745	831	708	701	719	605	707	898	958	946	1311	819	881	792
6.645	776	747	654	709	714	644	717	884	977	960	1196	776	844	798
6.65	753	748	691	744	772	655	712	845	936	987	1170	785	870	821
6.654	750	712	661	694	779	610	669	884	1050	916	1173	813	897	800
6.658	746	749	678	740	749	595	702	906	983	968	1172	832	918	789
6.662	743	740	684	702	755	634	669	879	979	1035	1276	752	869	804
6.666	747	777	682	686	742	574	686	921	946	967	1198	773	887	801
6.669	741	782	709	721	736	654	659	874	937	948	1248	839	814	746
6.673	682	755	689	716	736	612	690	791	946	936	1150	755	932	763
6.677	721	769	718	754	740	627	752	896	971	984	1202	776	898	827
6.682	741	679	717	703	727	592	703	842	900	969	1172	820	824	805
6.686	670	774	658	711	738	646	658	827	966	974	1260	802	861	827
6.69	689	705	665	696	747	629	673	859	948	932	1178	767	860	831
6.694	762	705	670	694	746	574	725	916	937	993	1167	792	827	800
6.698	684	755	724	719	803	588	760	824	933	943	1157	836	828	732
6.702	737	769	674	714	745	647	707	859	940	1004	1194	808	871	821
6.706	713	762	690	713	769	615	701	992	965	1031	1205	802	874	766
6.709	688	744	757	780	732	624	669	949	1004	1020	1143	733	863	806
6.714	779	765	687	672	809	584	727	968	1103	929	1119	790	888	772
6.718	724	748	754	743	762	633	652	1003	1237	1066	1147	791	921	845
6.722	769	790	699	716	759	588	691	1080	1258	1072	1182	808	980	868
6.726	740	771	684	748	784	609	671	1139	1379	1076	1198	771	932	852
6.73	790	814	740	687	790	646	775	1124	1383	1035	1135	835	953	817
6.734	761	816	750	776	832	661	786	1270	1467	1125	1114	751	935	831
6.738	787	803	752	795	789	691	728	1283	1500	1089	1073	809	970	825
6.741	806	794	695	782	843	651	725	1282	1573	1114	1071	797	911	853
6.746	791	828	686	788	826	667	721	1223	1467	1078	1113	818	946	821
6.75	870	829	762	792	844	666	696	1292	1466	1050	1135	758	912	927
6.754	797	873	805	764	824	611	787	1181	1367	1022	1149	830	1009	856
6.758	754	828	694	749	834	660	735	1158	1320	1069	1032	811	913	815
6.762	786	832	731	799	799	607	738	1097	1288	1038	1048	826	885	866
6.766	775	847	724	770	842	624	681	1047	1183	977	1103	809	910	849
6.77	761	756	682	794	785	650	675	1022	1177	1014	1088	788	945	821
6.774	734	767	679	731	824	663	714	985	1020	1002	996	780	894	797
6.778	746	780	793	765	775	638	695	931	995	943	1030	782	948	836
6.782	753	742	690	788	743	598	686	883	993	974	1061	827	912	800
6.786	767	734	663	731	679	616	732	886	900	903	1057	847	930	826
6.79	796	733	735	747	751	594	693	898	994	929	1081	805	965	799
6.794	697	755	685	756	765	637	673	799	887	894	1052	751	864	737
6.798	712	738	739	748	737	677	725	856	887	918	1061	775	926	833
6.802	754	750	699	730	804	637	719	766	904	919	1033	790	900	804
6.806	749	785	712	751	715	648	751	804	903	921	1036	826	928	846
6.81	750	743	653	754	699	634	798	818	937	873	1035	744	838	797
6.814	791	728	686	758	685	665	715	782	837	874	1036	822	919	760
6.818	825	821	676	662	672	670	761	798	893	886	965	806	985	813
6.822	835	767	720	710	705	617	803	834	926	915	999	817	904	804
6.826	890	701	658	732	695	601	879	823	947	991	933	860	1012	804
6.83	847	691	722	721	761	636	736	807	1003	945	1007	770	959	781
6.834	957	780	670	690	725	652	824	859	1066	1005	1011	764	1005	849
6.838	907	755	705	802	804	643	780	997	1281	1082	961	789	1023	780
6.842	991	768	685	667	875	645	892	1293	1723	1361	1076	820	980	825
6.846	879	724	711	719	1086	631	917	1984	2659	1833	1037	781	919	834
6.85	919	762	634	742	1490	602	971	3137	4418	2585	962	772	995	851
6.854	908	745	696	765	2242	610	1534	5213	6733	4097	1032	784	957	780
6.858	917	716	724	823	3307	649	1969	7983	11156	5774	1015	828	949	817
6.862	909	734	711	701	4974	656	2925	12839	16145	8018	1011	772	894	871
6.866	876	802	739	724	7080	624	4075	17429	22050	11871	974	842	976	793
6.87	896	758	661	637	10044	642	5401	23245	30332	14716	949	785	917	837
6.874	902	788	744	691	13011	601	6933	30538	36851	18333	936	752	982	789
6.878	901	730	643	723	15796	612	9503	36674	42890	20898	912	807	914	775
6.882	843	740	687	737	18794	625	11093	39895	47308	22055	986	738	948	810
6.886	807	779	700	692	20753	645	12349	42617	49570	22423	984	798	981	759
6.89	837	723	685	687	22145	656	13331	42815	49733	22286	925	828	1025	848
6.894	843	750	680	717	22015	630	12803	40784	48389	20659	990	772	973	785
6.898	784	718	696	755	20622	593	12683	37409	42843	18783	973	803	991	766
6.902	796	805	704	742	18754	661	11784	32679	36782	16094	941	724	958	825
6.906	856	775	684	748	16018	578	9887	26886	31014	13609	961	781	957	797
6.91	832	735	654	698	13895	629	8595	21490	23918	11384	929	788	990	796
6.914	881	750	704	740	11690	668	6902	16908	18654	9172	940	767	946	815
6.918	801	772	624	724	9317	670	5722	12796	14205	6966	968	806	1022	807
6.922	780	793	706	722	7215	650	4632	9755	10813	5429	977	766	986	762
6.926	868	741	656	773	5715	639	3808	7000	7988	4372	983	739	972	765
6.93	747	795	665	704	4640	650	3094	5425	6181	3380	962	763	983	801
6.934	815	726	704	732	3729	595	2519	4371	4796	2951	1027	759	967	788
6.938	793	719	689	730	3147	606	2093	3362	3804	2535	928	818	968	761
6.942	800	777	703	684	2458	617	1817	2750	3122	2171	994	752	984	780
6.946	810	813	648	692	2188	637	1574	2396	2653	1919	934	791	960	832
6.95	741	753	750	722	1923	603	1454	2037	2375	1735	952	791	960	824
6.954	830	718	648	715	1781	615	1246	1855	2103	1614	928	801	923	783
6.958	782	776	695	787	1560	549	1176	1678	1860	1469	947	777	972	812
6.962	826	707	722	732	1420	645	1085	1515	1756	1382	877	763	925	845
6.966	791	705	637	687	1330	613	1092	1426	1578	1292	982	777	959	791
6.97	793	695	693	717	1246	649	1020	1385	1460	1190	904	809	928	794
6.974	760	791	709	735	1211	585	932	1299	1514	1210	913	814	909	826
6.978	784	764	718	690	1162	626	939	1235	1455	1157	918	748	923	805
6.982	750	744	662	691	1148	629	935	1215	1409	1232	923	802	893	762
6.986	806	747	610	750	1118	658	906	1141	1343	1123	914	776	1004	774
6.99	712	749	661	763	1064	585	863	1215	1361	1123	976	812	912	840
6.994	762	686	692	732	974	655	876	1122	1388	1156	955	741	898	764
6.998	865	801	692	739	1032	648	844	1178	1270	1162	948	749	876	818
7.002	801	754	633	727	1008	633	838	1291	1518	1141	935	845	1023	855
7.006	777	812	645	773	961	609	877	1305	1549	1281	964	777	940	818
7.01	829	719	684	691	862	618	877	1329	1619	1310	930	734	990	797
7.014	776	685	659	708	920	672	817	1384	1681	1302	901	787	971	799
7.018	743	747	674	687	921	637	811	1483	1762	1417	826	782	1010	846
7.022	729	711	654	673	916	610	773	1632	1832	1368	862	803	935	772
7.026	793	794	668	651	843	636	777	1638	1934	1466	890	818	915	812
7.03	787	771	677	711	918	600	772	1676	1821	1438	912	742	906	810
7.034	754	728	696	673	927	613	795	1703	1833	1380	939	738	941	852
7.038	811	774	685	676	862	581	801	1650	1825	1348	958	780	943	843
7.042	796	744	677	714	947	604	789	1619	1761	1297	933	791	982	813
7.046	747	704	726	715	906	620	755	1505	1700	1270	857	753	894	781
7.05	734	748	681	725	823	625	826	1331	1563	1208	919	714	941	774
7.054	755	741	714	751	912	625	745	1294	1432	1144	899	840	936	765
7.058	771	765	690	736	868	608	753	1215	1321	1196	892	777	924	806
7.062	749	752	674	723	852	617	771	1130	1255	1049	894	780	970	815
7.066	763	741	658	696	947	662	749	1099	1211	1031	856	788	943	766
7.07	725	676	670	700	839	593	778	1041	1178	988	927	796	935	824
7.074	763	662	700	723	850	643	749	909	1035	955	958	800	991	844
7.078	737	705	683	677	846	655	718	915	1013	929	860	738	976	781
7.082	761	802	703	774	809	593	709	891	957	907	927	783	903	820
7.086	747	669	722	744	841	612	736	829	981	883	915	785	970	836
7.09	778	753	746	698	881	604	761	837	1017	948	948	794	933	807
7.094	818	746	638	685	867	647	713	893	955	890	901	777	944	876
7.098	789	729	678	757	848	599	752	877	933	907	871	784	952	857
7.102	743	750	740	754	835	636	722	888	895	901	836	774	944	847
7.106	755	742	643	733	867	586	792	845	944	919	884	788	954	818
7.11	767	785	744	681	848	621	676	823	988	914	900	773	947	823
7.114	758	723	683	697	812	595	717	793	976	941	881	754	893	850
7.118	791	763	673	709	782	594	718	810	992	849	886	807	923	828
7.122	793	766	729	709	760	662	708	805	924	979	917	754	904	874
7.126	839	768	697	728	841	646	768	849	938	920	922	825	941	823
7.13	801	755	759	682	849	623	744	833	896	872	868	781	894	829
7.134	782	752	685	755	768	618	737	804	884	908	925	811	957	822
7.138	850	748	648	707	814	609	706	800	885	875	835	781	939	804
7.142	777	738	653	721	810	615	790	799	963	964	913	777	897	828
7.146	747	724	684	683	859	643	722	796	951	929	884	717	917	824
7.15	760	784	679	773	802	583	701	823	885	902	916	831	933	770
7.154	844	769	691	686	821	617	684	792	895	915	950	780	912	790
7.158	766	737	739	716	787	637	730	786	872	906	893	816	888	815
7.162	836	812	710	679	788	670	790	793	876	885	861	815	947	800
7.166	820	752	659	717	837	608	737	791	894	981	853	726	918	819
7.17	768	764	729	763	826	594	676	829	890	916	888	806	925	799
7.174	784	720	732	725	761	619	676	837	884	896	919	822	902	875
7.178	763	735	755	703	835	650	773	713	918	920	903	884	902	837
7.182	788	807	730	673	816	636	706	769	931	901	879	768	922	876
7.186	806	821	687	675	784	631	732	831	897	902	903	838	926	854
7.19	747	728	711	716	833	662	715	818	947	914	887	864	903	823
7.194	765	798	660	720	794	616	730	793	852	854	840	726	948	904
7.198	726	761	758	707	834	640	733	741	883	911	900	722	901	947
7.202	834	769	742	696	781	635	717	786	846	900	862	780	962	1059
7.206	766	707	697	749	831	652	732	777	887	872	915	757	883	1104
7.21	770	788	668	772	820	627	744	802	878	869	876	756	827	1158
7.214	800	774	701	697	804	608	744	795	893	909	892	797	960	1192
7.218	803	733	700	757	856	654	718	868	913	880	910	835	853	1206
7.222	720	776	706	758	808	650	746	838	810	831	906	755	909	1206
7.226	815	755	709	740	755	656	688	766	844	838	958	783	923	1134
7.23	724	755	646	757	775	591	688	779	926	897	987	813	881	1159
7.234	811	778	811	762	737	616	744	795	888	847	949	792	872	1207
7.238	789	739	735	766	824	650	715	766	874	878	928	791	812	1097
7.242	794	784	690	851	813	665	684	759	947	852	956	768	890	1129
7.246	805	748	754	765	761	659	762	775	873	864	966	746	900	1032
7.25	756	779	721	760	776	635	763	825	843	856	961	792	833	967
7.254	801	720	690	727	779	588	727	724	868	886	901	830	888	904
7.258	799	786	668	690	773	655	779	816	862	876	922	798	927	934
7.262	750	784	690	708	793	656	689	706	855	909	905	819	874	943
7.266	764	812	725	684	750	636	681	716	874	850	1013	786	909	914
7.27	830	779	700	757	797	658	700	776	832	840	830	818	924	886
7.274	751	765	736	794	758	692	774	791	839	841	915	796	899	885
7.278	781	827	700	711	744	697	732	759	846	825	956	757	975	850
7.282	752	744	716	744	733	676	740	665	816	874	880	774	890	884
7.286	834	789	703	733	746	636	759	759	937	870	854	713	910	856
7.29	852	777	670	730	740	636	754	799	839	854	865	777	874	811
7.294	750	790	663	695	826	628	709	740	856	823	836	782	885	838
7.298	784	749	724	714	736	618	704	792	826	842	919	726	954	821
7.302	787	799	664	709	728	626	655	729	856	841	858	761	884	883
7.306	770	756	676	700	764	609	740	823	855	862	791	794	876	885
7.31	823	758	656	752	721	637	725	724	863	832	857	802	915	829
7.314	799	759	681	714	752	612	688	748	809	844	958	817	893	818
7.318	826	742	656	712	729	575	754	809	772	889	1001	762	908	837
7.322	789	801	709	684	730	672	697	802	798	883	934	743	914	810
7.326	791	713	708	684	751	600	649	778	853	889	935	791	884	812
7.33	785	752	677	706	754	615	693	807	813	842	977	799	967	832
7.334	732	693	694	697	689	612	693	736	880	850	898	718	880	844
7.338	735	776	712	728	762	675	668	811	871	815	918	779	859	786
7.342	790	755	682	679	763	668	717	811	893	891	923	777	895	852
7.346	830	717	705	714	740	634	675	749	827	836	899	798	929	810
7.35	838	792	700	756	774	640	695	747	849	830	1350	751	939	860
7.354	743	736	666	719	723	654	717	784	864	891	1806	778	900	791
7.358	732	757	651	732	723	632	697	788	853	929	1976	821	858	820
7.362	813	740	716	726	785	652	685	807	822	974	1987	838	986	810
7.366	728	714	664	694	710	660	739	939	844	1087	2122	787	891	791
7.37	746	694	724	672	785	616	718	1073	910	1181	2156	780	892	807
7.374	817	754	668	773	767	630	707	1063	876	1110	2154	778	900	847
7.378	850	719	660	690	778	640	714	1084	990	1209	2064	805	895	817
7.382	790	722	722	715	771	671	669	1045	966	1188	1986	786	901	811
7.386	758	817	693	753	792	644	657	1131	944	1183	1977	771	913	834
7.39	743	744	700	737	748	639	715	1005	1026	1204	1831	779	865	745
7.394	765	757	724	690	761	607	702	1062	1003	1192	1744	822	854	777
7.398	758	723	670	723	734	667	774	1034	991	1182	1670	775	869	791
7.402	776	763	708	721	756	645	647	1031	1040	1131	1695	803	812	811
7.406	791	733	708	678	727	659	700	985	984	1161	1650	769	861	805
7.41	818	761	687	686	709	633	672	1023	1028	1105	1617	804	901	794
7.414	790	733	723	692	793	648	705	977	1067	1044	1523	824	864	880
7.418	737	743	706	745	808	598	727	1006	1023	991	1498	809	896	728
7.422	728	730	689	753	747	626	782	992	991	1075	1483	744	923	791
7.426	802	752	643	737	754	592	714	948	999	1061	1396	832	876	887
7.43	774	826	660	771	764	612	694	927	936	975	1346	774	895	874
7.434	786	759	698	814	802	617	692	982	898	983	1280	811	936	870
7.438	814	727	645	837	792	622	690	951	1021	1052	1308	790	885	894
7.442	768	761	673	803	781	635	680	865	931	999	1234	729	845	919
7.446	835	741	701	830	772	659	750	915	938	987	1280	827	887	923
7.45	766	751	764	878	789	593	702	907	987	978	1287	822	894	1023
7.454	805	785	716	855	801	633	757	864	945	948	1134	798	945	1026
7.458	785	715	724	885	770	717	689	887	925	974	1150	774	906	1105
7.462	786	740	714	823	773	638	764	837	912	925	1127	815	926	1094
7.466	761	718	757	847	784	637	744	794	896	909	1161	770	964	1182
7.47	815	815	828	856	811	661	704	831	937	918	1094	823	916	1103
7.474	758	800	802	820	744	648	713	856	940	936	1083	781	905	1158
7.478	776	741	724	834	806	698	704	934	950	931	1070	768	889	1069
7.482	881	717	756	860	802	619	693	835	881	934	1125	770	1023	1061
7.486	834	772	764	835	823	658	753	791	929	900	1076	762	968	1013
7.49	794	755	795	837	819	647	664	859	919	943	1094	790	919	1008
7.494	795	770	729	802	786	648	739	851	811	884	1058	790	990	928
7.498	836	756	704	847	821	694	682	854	887	965	1044	765	993	970
7.502	828	807	748	798	759	655	713	846	883	837	1059	774	935	928
7.506	840	807	788	852	846	639	726	753	922	925	1038	780	891	914
7.51	867	752	775	809	772	611	693	842	907	830	1022	781	970	937
7.514	855	819	776	801	803	692	732	883	865	876	1009	775	936	958
7.518	868	801	743	749	775	614	732	795	843	864	975	814	885	899
7.522	831	800	734	814	755	640	725	770	866	946	981	824	993	861
7.526	820	787	748	839	818	625	720	797	842	885	1007	731	962	919
7.53	810	772	706	769	816	684	690	820	932	909	1029	761	939	907
7.534	855	800	762	760	805	610	709	811	849	831	1003	774	911	929
7.538	903	793	732	782	816	666	757	803	865	913	940	817	904	934
7.542	841	777	714	819	823	668	774	812	897	914	911	776	883	969
7.546	835	724	684	758	878	662	750	828	888	895	969	741	903	1148
7.55	866	818	759	777	834	633	716	798	1015	948	977	746	911	1147
7.554	810	748	752	803	797	647	726	874	998	919	1059	800	936	1366
7.558	788	799	752	808	880	651	788	849	967	1008	1006	792	916	1501
7.562	856	750	722	751	814	676	788	943	988	980	1054	828	897	1724
7.566	842	785	742	794	818	683	764	972	1050	952	1011	743	954	1657
7.57	880	839	730	830	866	665	791	984	1020	957	1027	808	913	1776
7.574	835	867	738	822	888	695	750	1044	1032	927	1083	761	1030	1783
7.578	858	769	737	829	864	673	759	955	1064	928	1037	784	934	1644
7.582	794	790	782	792	863	690	739	980	1014	894	1028	753	1026	1789
7.586	918	804	738	878	927	701	731	975	1099	1002	967	835	983	1754
7.59	791	761	737	868	879	746	731	1070	1130	957	1054	770	1051	1651
7.594	835	762	815	873	848	666	749	1018	1105	933	1006	771	1009	1666
7.598	835	828	814	879	874	697	769	1006	1046	1014	1071	796	940	1536
7.602	852	818	715	854	912	721	728	965	1053	978	1002	762	1035	1472
7.606	868	794	805	878	837	685	761	932	928	930	952	759	987	1462
7.61	892	825	767	806	822	707	765	862	1021	882	967	806	970	1365
7.614	838	796	747	860	875	673	795	881	979	893	1035	840	957	1265
7.618	855	830	752	889	834	705	743	812	939	873	961	775	951	1243
7.622	859	804	771	876	819	642	758	827	933	875	908	737	951	1197
7.626	873	797	785	851	795	664	830	790	949	835	1003	791	968	1109
7.63	865	829	757	773	857	645	748	749	900	846	943	721	980	1153
7.634	829	818	777	810	837	680	762	766	872	905	932	781	972	1119
7.638	844	765	726	814	904	726	766	715	870	787	928	749	914	1049
7.642	848	784	752	778	833	687	714	819	823	938	951	779	997	1080
7.646	855	835	736	877	798	726	747	754	855	887	953	773	919	1047
7.65	895	750	715	825	852	669	734	830	866	923	875	760	895	1034
7.654	850	701	735	793	776	700	739	839	875	937	830	768	1000	980
7.658	875	792	753	757	773	689	743	799	803	820	931	757	956	1053
7.662	813	730	702	739	860	650	735	749	907	898	864	775	985	983
7.666	807	781	769	832	767	666	766	758	814	875	918	838	898	887
7.67	822	748	745	764	756	694	770	773	846	798	923	726	928	940
7.674	748	772	647	719	809	629	718	774	829	859	899	794	937	928
7.678	840	756	700	717	724	698	722	766	853	847	893	780	949	901
7.682	829	772	671	722	784	682	727	725	843	851	863	756	921	970
7.686	775	762	729	769	789	685	749	742	788	824	850	761	877	947
7.69	820	800	684	799	795	679	697	755	942	842	914	805	913	872
7.694	830	732	707	760	776	673	681	740	835	869	973	771	925	887
7.698	893	772	756	744	778	689	729	722	916	879	875	780	931	893
7.702	791	747	664	741	767	628	731	779	803	882	884	764	920	867
7.706	754	767	640	751	747	643	676	752	878	824	896	783	903	873
7.71	772	808	710	734	705	669	726	739	798	792	880	753	881	870
7.714	800	741	732	759	751	664	703	719	849	858	884	779	890	868
7.718	799	726	718	729	751	638	778	734	802	930	862	772	823	922
7.722	766	802	686	723	717	654	656	762	848	791	846	787	859	908
7.726	791	762	702	706	746	671	738	702	835	808	841	839	918	826
7.73	801	767	697	747	752	636	707	731	891	812	880	746	957	829
7.734	853	799	694	748	741	676	726	755	786	853	875	752	896	881
7.738	835	764	673	747	826	688	696	728	877	832	852	827	926	895
7.742	797	699	624	734	712	652	743	832	884	879	847	781	899	852
7.746	846	725	719	733	759	660	710	703	804	853	900	831	914	891
7.75	858	728	740	728	707	654	731	740	889	841	877	729	900	840
7.754	818	803	669	755	741	643	714	698	852	902	793	762	878	896
7.758	826	702	695	771	713	644	665	725	798	827	905	763	963	879
7.762	767	746	710	705	748	678	688	701	837	832	847	808	910	821
7.766	826	783	687	690	777	639	689	730	814	829	846	697	926	844
7.77	849	787	726	736	817	602	677	687	849	829	836	739	900	872
7.774	766	777	724	740	746	618	727	732	817	862	863	756	844	832
7.778	831	743	704	676	791	619	730	736	797	875	872	784	837	856
7.782	830	738	709	777	749	664	659	710	797	827	913	751	928	828
7.786	742	730	709	773	778	609	729	756	853	818	846	781	878	893
7.79	871	798	732	717	781	630	686	742	816	858	752	761	932	823
7.794	772	742	702	733	687	620	692	730	853	845	843	759	866	836
7.798	761	665	741	802	722	611	720	752	774	851	826	831	874	867
7.802	730	812	696	719	761	699	686	718	833	884	853	824	910	843
7.806	815	719	703	691	764	694	759	718	798	826	833	767	871	859
7.81	802	757	711	717	779	681	736	695	890	924	794	794	920	844
7.814	773	778	681	700	739	638	654	731	799	864	819	798	898	841
7.818	799	746	684	737	777	663	702	793	813	881	857	770	885	821
7.822	799	765	657	730	732	678	648	711	813	778	807	724	912	822
7.826	801	794	675	734	792	632	709	697	774	871	868	735	925	861
7.83	824	804	705	711	715	651	678	720	811	823	806	848	899	842
7.834	851	764	716	755	752	630	684	737	815	839	812	802	915	810
7.838	766	716	680	707	803	620	732	690	848	826	761	828	874	852
7.842	764	773	629	775	765	675	676	763	885	902	874	817	906	821
7.846	793	737	657	701	755	652	738	733	753	767	900	778	874	805
7.85	802	737	638	731	731	627	707	723	849	778	853	774	886	833
7.854	793	741	694	707	754	627	716	801	872	894	828	779	951	831
7.858	798	759	694	716	746	637	675	767	799	845	892	789	847	868
7.862	786	772	699	790	744	672	709	742	897	895	839	813	902	782
7.866	769	702	720	743	719	647	716	765	805	816	856	773	856	849
7.87	769	764	704	724	761	664	678	728	822	808	849	753	914	778
7.874	798	749	652	722	781	644	727	734	811	841	853	768	905	812
7.878	752	722	680	712	780	612	653	777	859	823	888	738	933	849
7.882	784	798	712	713	703	656	678	699	873	753	835	775	921	823
7.886	814	731	717	718	766	632	718	694	870	817	816	861	814	837
7.89	792	722	688	738	762	609	663	729	846	867	893	812	859	837
7.894	832	752	691	706	786	679	687	774	819	884	856	815	873	811
7.898	803	745	701	742	775	680	696	762	838	793	895	741	895	762
7.902	790	713	632	733	750	629	708	737	796	793	841	752	856	789
7.906	855	746	623	710	736	666	719	744	876	843	887	819	976	806
7.91	827	731	681	694	779	662	701	739	838	879	828	801	862	760
7.914	774	827	641	699	755	629	677	787	811	778	734	796	947	797
7.918	786	762	723	681	742	655	700	760	815	879	842	741	912	879
7.922	850	776	656	676	724	653	702	789	816	788	791	744	907	818
7.926	787	803	691	745	739	600	671	742	828	855	797	766	859	778
7.93	761	750	708	688	726	666	685	765	832	849	831	748	900	784
7.934	821	758	708	750	776	616	745	786	836	862	813	752	911	858
7.938	817	680	643	722	731	659	669	792	847	845	840	785	913	833
7.942	780	739	706	689	734	663	650	769	830	848	804	778	921	837
7.946	852	764	740	756	800	660	728	710	806	843	743	756	910	805
7.95	808	759	691	769	724	661	738	729	802	840	808	762	866	782
7.954	811	756	699	676	772	645	676	726	882	737	785	740	878	806
7.958	835	739	646	630	695	626	713	765	779	849	899	782	888	844
7.962	765	746	714	715	760	621	746	753	741	786	808	728	930	826
7.966	759	728	661	723	724	629	715	762	828	824	888	772	843	837
7.97	817	771	669	694	774	666	753	753	870	751	843	785	938	791
7.974	802	750	619	748	750	657	753	784	796	873	893	860	891	801
7.978	780	735	677	708	762	597	665	757	817	826	860	828	897	763
7.982	761	679	646	732	786	621	716	720	803	862	837	808	882	830
7.986	778	743	674	678	783	643	691	769	864	843	863	772	880	828
7.99	782	744	651	698	762	633	731	777	816	928	886	827	956	815
7.994	774	718	671	663	643	667	697	759	878	918	902	761	925	759
7.998	809	707	702	730	801	617	668	755	854	821	855	819	914	796
[truncated: 7,371 more rows]

## Sheet: peaks
co_wt1			co_wt2			co_adh1			co_adh2			co_adh_aa			co_adh_acet			co_adh_aa_acet			mm1			mm2			mm3			ajm50p			blank13			scaplp_WT			scaplp_adh
	1.287	1.251		1.283	129.766		1.283	275.766		1.287	275.731		1.283	172.038		1.283	138.826		1.283	135.486		1.287	172.057		1.287	146.628		1.283	125.643		1.287	145.83		1.287	156.39		1.287	141.922		1.283	601.893
	1.351	1.319		1.347	101.393		1.347	28.789		1.351	30.903		1.351	44.113		1.347	12794		1.331	1161.08		1.347	803.748		1.343	414.141		1.347	111.179		1.351	16.306		1.355	18.595		1.347	46.721		1.347	64.621
	1.399	1.375		1.399	4200.68		1.399	7761.6		1.399	3115.39		1.403	17248.1		1.399	5203.21		1.351	1508		1.415	3416		1.355	242.763		1.415	13439.6		1.419	105.649		1.423	201.004		1.415	9192.55		1.407	8688.67
	1.423	1.407		1.415	7919.32		1.415	13192.8		1.415	12085.5		1.679	16.217		1.411	7931.35		1.399	3963.61		1.487	250.269		1.419	9155.24		1.487	105.958		1.495	11.821		1.599	12.913		1.571	29.178		1.427	3281.49
	1.679	1.651		1.575	12.832		1.675	16.641		1.675	23.593		1.827	421.469		1.511	237.899		1.415	9438.19		1.575	45.761		1.487	289.277		1.571	85.828		1.683	25.514		5.821	31.993		1.927	15539.8		1.567	14.328
	1.939	1.799		1.679	18.992		1.943	51.401		1.807	33.925		1.939	8245		1.679	18.406		1.507	221.55		1.679	15.413		1.547	11.448		1.811	570.401		2.288	442.376		18.099	8563.57		1.943	12447.3		1.675	21.6
	2.051	1.967		1.931	16997.4		2.035	1072.62		1.943	118.9		2.043	26179.5		1.779	172.778		1.675	23.12		1.939	15772.5		1.575	38.367		1.935	27302.5		2.375	241.834		24.323	114.068		2.055	19925.3		1.851	22.942
	2.115	2.063		1.943	8344.67		2.376	15.303		2.039	1108.09		2.323	38.513		1.939	138.185		1.939	6302.31		1.967	2122.76		1.595	22.735		2.011	9678.63		2.808	16.227		26.256	381.841		2.087	10929.9		1.939	197.056
	2.695	2.675		2.043	16017.6		2.64	51.868		2.372	19.158		2.371	17.105		2.039	318.029		2.099	29188.7		2.043	21552.6		1.807	1841.7		2.288	102.719		3.476	435.006		27.352	61.076		2.655	54.532		2.039	793.716
	2.968	2.912		2.091	12786.2		2.944	19.013		2.62	65.069		2.668	27.257		2.288	59.682		2.247	32.937		2.287	133.732		1.919	10165.4		2.319	29.678		5.177	57.627		27.42	43.101		2.924	1453.02		2.367	37.501
	3.236	3.192		2.671	25.408		3.28	57.58		2.924	36.744		2.736	41.789		2.375	43.162		2.295	12.431		2.323	60.002		1.931	5253.25		2.375	54.317		5.817	243.342		31.05	16.874		2.987	105.973		2.655	84.341
	3.412	3.348		2.952	111.474		3.392	7884.24		3.276	135.502		2.956	33.101		2.644	32.76		2.327	19.015		2.375	75.75		1.955	9809.42		2.668	21.606		6.314	1413.57		31.491	11.015		3.232	190.086		2.936	1582.05
	3.48	3.448		2.992	47.311		3.408	10961.4		3.408	17901.4		2.992	967.598		2.912	87.153		2.736	40.172		2.664	22.632		2.119	35722.8		2.716	61.4		7.37	73.53		31.907	15.951		3.4	8188.85		3.28	63.091
	3.88	3.844		3.232	93.418		3.472	5896.04		3.472	5659.99		3.408	16717.4		3.248	4426.63		2.992	654.712		2.732	43.394		2.223	65.074		2.94	125.709		8.047	57.15		31.967	11.681		3.412	3012.16		3.404	14548.9
	4.324	4.276		3.4	9547.15		3.972	32.864		3.628	14.193		3.476	4447.7		3.396	9876.2		3.248	7587.16		2.948	30.917		2.291	105.024		2.988	1018.29		8.207	1074.28		32.099	14.351		3.476	3617.51		3.472	5504.33
	5.813	5.757		3.476	3254.9		5.814	414.561		3.916	32.466		3.792	122.359		3.472	2595.81		3.396	4884.95		2.988	1695.86		2.327	136.558		3.396	9163.08		15.687	149.277		32.131	13.544		3.752	13.94		3.912	533.954
	8.619	8.555		4.316	175.782		8.255	57.932		3.98	39.577		3.876	10.595		3.92	22.023		3.408	7566.58		3.396	1843.27		2.379	49.238		3.472	7744.83		18.1	5770.86		32.175	29.685		3.86	10.176		3.976	51.402
	8.719	8.691		5.813	445.047		8.623	55.226		4.625	21.295		3.976	28.157		4.041	21.408		3.48	3232.2		3.472	688.341		2.603	14.266		3.788	128.675		23.503	15.424		32.303	18.158		4.308	1068.24		4.649	19.474
	15.678	15.598		8.615	2137.3		15.675	376.755		5.817	370.181		4.325	18.747		4.621	29153.7		3.792	119.591		3.788	244.48		2.715	316.445		4.316	186.373		24.323	133.313		32.339	13.016		4.644	90.449		5.809	381.873
	15.694	15.682		8.715	359.398		18.096	3083.81		8.631	74.987		5.041	113.356		4.641	17391.9		3.989	10.696		4.309	2677.7		2.992	1856.66		4.593	2136.83		26.072	29.489		32.379	12.371		5.813	411.727		7.582	56.018
	18.104	17.988		15.687	447.173		23.383	18108.3		15.686	354.857		5.201	44.4		4.657	8835.78		4.032	40.796		4.597	7503.43		3.08	12.453		4.849	72.415		26.253	525.551		32.423	10.762		8.606	10720.1		8.23	151.663
	23.387	23.315		18.104	3342.19		24.219	10.317		16.335	22.211		5.513	585.974		4.681	10039.2		4.629	31996.7		4.845	40.194		3.152	20.24		5.041	108.185		26.365	25.035		32.535	32.22		8.706	1407.77		8.623	127.036
	24.219	24.199		23.375	8978.16		24.319	274.668		18.104	3290		5.709	33.869		4.705	14169.8		4.653	20948.9		5.041	210.279		3.236	84.163		5.205	51.405		26.845	15.417		32.555	13.799		15.682	404.767		15.682	299.874
	24.323	24.283		23.491	726.281		25.176	637.59		23.39	20405.6		5.813	424.149		4.733	17381.5		4.673	11477.5		5.201	84.202		3.396	3465.12		5.389	40.432		27.349	321.435		32.591	28.766		18.103	3780.46		17.219	119.306
	24.748	24.715		23.723	31.403		25.632	21.189		24.323	700.4		6.89	997.54		4.753	13053.3		4.725	31196		5.389	143.842		3.476	3060.61		5.513	619.742		27.413	85.856		32.627	10.205		23.371	13413.1		18.096	3464.05
	24.844	24.82		24.223	16.254		25.756	18.811		25.183	627.932		8.255	38.163		5.405	13481.7		4.737	5988.2		5.509	1080.54		3.788	395.685		5.709	47.46		27.621	138.417		32.655	14.065		23.483	904.144		23.37	10152.3
	25.188	25.152		24.319	738.21		26.253	405.642		25.56	15.924		8.631	67.797		5.818	381.084		5.057	55.345		5.709	76.708		4.088	28.411		5.809	396.261		28.198	26.503		32.679	12.967		24.315	298.947		23.478	767.098
	25.332	25.308		24.411	10.09		26.901	20.403		25.632	23.329		15.687	453.584		8.635	34.146		5.213	19.804		5.809	343.854		4.316	580.125		6.322	607.243		31.912	24.143		32.739	19.475		24.7	55.756		24.319	221.709
	25.628	25.604		24.751	285.754		26.937	79.054		25.756	17.608		18.104	3337.74		15.671	128.238		5.402	10526.6		6.322	541.068		4.845	18.952		6.886	1028.86		31.948	14.034		32.783	14.114		24.748	314		24.691	157.268
	25.756	25.732		24.843	79.893		27.041	10.069		25.864	13.123		23.391	18856.1		15.691	262.154		5.518	313.303		6.89	1873.87		4.853	27.91		7.026	28.531		32.012	18.204		32.847	15.38		24.848	90.149		25.179	746.533
	25.824	25.792		25.18	412.517		27.349	450.164		26.256	1755.34		23.771	27.002		15.851	567.132		5.818	429.862		7.386	21.409		5.045	248.141		8.227	204.752		32.112	10.491		33.059	10.691		25.184	117.196		25.34	16.843
	25.908	25.9		25.332	29.114		28.202	101.58		26.848	28.514		24.223	11.044		16.127	185.414		6.89	562.715		8.235	175.17		5.197	101.293		8.623	21892		32.132	10.884		33.167	16.385		25.336	22.554		25.628	21.668
	25.928	25.924		25.56	18.291		28.462	13.013		26.892	24.467		24.319	756.922		18.104	2977.74		8.263	82.873		8.623	20225.9		5.513	1183.47		8.631	17766.9		32.204	10.707		33.231	22.723		25.636	23.558		25.716	11.732
	26.256	26.232		25.632	32.002		31.908	10.859		26.94	156.458		25.18	383.775		19.037	72.429		14.267	41.937		8.687	1889.65		5.705	91.988		8.711	3250.2		32.292	10.546		33.283	15.05		25.752	18.315		25.756	23.749
	26.801	26.781		25.756	20.255		32.288	15.38		27.036	13.004		25.556	15.546		23.371	9772.33		14.403	219.807		8.731	16976.5		5.809	460.637		9.139	65.921		32.304	15.094		33.327	11.393		25.812	3106.88		26.252	438.405
	26.845	26.825		25.82	719.223		32.908	10.194		27.349	1004.63		25.632	26.869		24.215	10.354		15.684	503.581		8.743	8495.48		6.329	402.12		13.381	124.972		32.336	14.088		33.427	29.4		26.012	51.913		26.796	10.573
	27.013	26.929		25.94	57.928		33.048	10.125		27.621	11.433		25.756	25.401		24.323	3252.19		15.852	347.681		9.135	115.107		6.545	30.606		15.679	324.995		32.368	14.103		33.444	16.246		26.252	465.849		26.888	25.207
	27.349	27.329		26.252	1719.11		33.088	10.804		28.201	95.856		25.912	12.099		24.475	23.95		16.136	138.436		13.369	356.637		6.742	28.222		18.1	3594.19		32.44	10.501		33.488	50.32		26.797	11.555		26.936	244.997
	27.433	27.425		26.797	12.63		33.409	12.381		32.015	10.655		26.252	1724.54		24.752	195.557		18.105	2963.61		13.906	114.931		6.89	2245.26		23.307	18.461		32.516	12.228		33.54	60.407		26.849	21.67		27.041	20.35
	28.201	28.177		26.849	50.771		33.493	42.629		32.023	10.232		26.369	22.394		24.852	46.116		23.376	11340.9		15.687	307.089		7.026	49.91		23.367	835.412		32.544	17.047		33.576	47.975		27.349	484.919		27.349	360.697
	31.051	31.031		26.885	18.462		33.545	18.297		32.192	16.691		26.621	17.159		24.956	29.356		23.8	23.424		18.1	3419.22		8.226	121.42		23.399	1781.08		32.568	12.681		33.632	45.162		27.417	60.353		27.621	42.535
	31.912	31.888		26.933	783.398		33.669	11.512		32.304	13.649		26.845	34.433		25.18	640.444		24.224	12.305		19.013	152.413		8.611	4293.71		23.491	382.682		32.588	16.149		33.66	24.864		27.617	13.108		28.105	60.637
	32.096	32.076		27.085	19.596		33.701	13.591		32.412	10.583		26.957	59.517		25.332	43.118		24.321	2908.69		23.303	37.491		8.687	1610.21		24.32	286.514		32.616	15.427		33.716	39.219		28.198	69.162		28.197	70.12
	32.328	32.288		27.101	59.327		33.853	15.126		32.46	21.595		27.349	781.036		25.56	115.214		24.477	46.826		23.379	13987.5		8.711	6581.79		24.392	19.272		32.664	11.009		33.736	28.889		28.898	10.099		28.901	13.326
	32.488	32.48		27.349	1861.73		33.917	13.079		32.62	15.665		27.417	73.745		25.628	37.275		24.749	1243.04		23.631	62.043		9.143	103.876		24.416	25.913		32.704	10.053		33.78	19.65		29.775	25.35		29.774	25.525
	32.58	32.556		27.625	17.76		34.369	17.379		32.648	10.393		28.198	52.143		25.716	11.62		24.845	183.9		23.671	40.1		13.394	42.942		24.756	12.172		32.732	11.382		33.804	21.957		31.043	15.275		31.495	10.46
	32.708	32.704		27.741	41.531		34.461	11.733		32.672	23.37		31.919	12.479		25.756	14.564		24.953	15.014		23.715	34.36		13.906	112.05		24.864	21.663		33.005	20.4		33.9	36.679		31.492	15.598		31.815	10.579
	32.748	32.728		28.105	118.556		34.677	10.148		32.936	10.13		32.004	14.749		25.864	12.604		25.181	432.841		23.751	12.872		15.671	161.969		24.908	31.44		33.028	12.73		33.924	24.85		31.908	17.028		32.367	14.98
	32.764	32.756		28.197	642.927		34.781	20.479		33.044	20.922		32.292	12.319		26.257	9988.24		25.329	91.846		24.319	285.736		15.683	258.403		24.972	21.955		33.048	15.105		33.976	53.532		32.316	15.57		32.387	11.88
	32.776	32.772		28.898	32.142		34.857	12.66		33.148	16.268		32.412	18.209		26.413	35.218		25.561	107.216		24.752	53.822		18.1	3437.17		25.02	16.042		33.073	25.519		34.02	77.253		32.424	16.344		32.924	25.763
	32.8	32.792		31.047	15.397		35.27	10.452		33.22	13.128		32.464	13.088		26.617	131.38		25.633	26.774		24.84	65.78		23.327	31.272		25.052	105.917		33.096	42.118		34.068	65.528		32.576	11.74		32.948	59.087
	32.828	32.816		32.284	12.209		35.438	11.857		33.304	11.433		32.5	23.206		26.849	502.14		25.753	18.053		24.904	18.702		23.411	502.422		25.112	136.798		33.136	28.424		34.088	60.504		32.588	22.12		32.972	24.536
	32.844	32.836		32.3	14.898		35.61	15.178		33.376	16.811		32.532	27.378		26.885	150.662		25.865	13.235		24.98	16.711		23.499	187.558		25.176	23.267		33.153	10.354		34.128	56.739		32.696	10.67		33.008	62.767
	32.88	32.86		32.324	11.83		35.654	12.288		33.452	11.415		32.548	19.79		26.937	375.91		25.909	14.85		25.024	25.72		24.32	409.396		25.232	23.153		33.181	21.493		34.188	50.98		32.72	20.154		33.04	57.734
	33	32.992		32.34	10.655		35.666	14.481		33.476	12.714		32.58	29.784		27.349	13329.8		26.253	12722.3		25.052	134.542		24.432	13.581		25.3	53.771		33.208	10.554		34.216	55.617		32.76	17.279		33.056	57.242
	33.1	33.096		32.36	19.333		35.738	10.239		33.492	10.169		32.612	36.728		27.737	541.229		26.414	35.93		25.124	19.673		24.752	184.728		25.56	17.037		33.232	25.88		34.252	38.389		32.772	12.061		33.108	108.902
	33.356	33.344		32.4	27.625		36.01	12.42		33.508	16.347		32.636	12.412		28.197	3185.4		26.618	128.147		25.228	20.832		24.848	26.244		25.624	50.746		33.264	21.053		34.288	18.622		32.808	22.079		33.156	164.505
	33.368	33.36		32.416	18.816		36.122	11.733		33.54	23.832		32.676	32.583		28.317	33.032		26.846	480.59		25.3	97.445		24.908	13.17		25.825	310.639		33.305	15.998		34.312	36.806		32.864	13.984		33.184	80.626
	33.38	33.372		32.448	21.439		36.146	19.589		33.564	27.864		32.688	21.018		28.482	23.245		26.942	149.109		25.556	17.083		25.02	23.393		26.073	42.61		33.437	10.18		34.356	46.424		32.888	13.718		33.216	90.291
	33.424	33.4		32.48	25.606		36.394	15.499		33.588	24.821		32.708	11.367		28.902	166.943		26.978	86.808		25.624	34.083		25.052	172.181		26.253	2577.62		33.465	14.836		34.408	11.836		32.996	47.86		33.24	92.135
	33.444	33.436		32.5	28.692		36.51	16.629		33.596	33.62		32.736	22.327		29.518	17.235		27.042	102.539		25.752	11.699		25.117	57.979		26.613	5290.24		33.485	17.731		34.444	11.791		33.02	32.401		33.26	83.465
	33.46	33.452		32.528	35.259		36.566	13.512		33.628	19.613		32.756	16.986		31.491	12.418		27.098	92.322		25.812	5608.31		25.229	66.969		26.845	156.417		33.533	16.365		34.488	14.499		33.032	26.533		33.284	145.195
	33.484	33.472		32.544	31.898		37.079	11.451		33.648	28.982		32.772	19.101		31.903	11.753		27.35	8866.63		26.024	30.436		25.301	116.222		27.349	4061.76		33.561	14.468		34.528	25.116		33.052	45.553		33.312	92.897
	33.504	33.492		32.556	41.229		37.155	12.762		33.676	41.882		32.816	17.903		32.295	12.931		27.738	139.386		26.072	76.767		25.557	15.004		27.417	306.947		33.589	11.678		34.584	27.295		33.068	45.567		33.328	92.568
	33.592	33.584		32.592	40.32		37.379	12.165		33.696	24.029		32.84	11.925		32.327	11.976		28.198	1310.95		26.253	3932.76		25.629	47.906		27.621	112.441		33.673	22.732		34.612	36.675		33.1	62.906		33.36	178.53
	33.725	33.701		32.624	63.134		37.399	15.218		33.721	17.363		32.956	26.029		32.568	12.495		28.899	85.341		26.617	9836.64		25.817	989.324		27.738	32.659		33.701	27.772		34.656	30.433		33.12	69.432		33.392	159.962
	33.741	33.733		32.652	55.281		37.423	10.337		33.736	48.89		33.004	28.231		32.76	15.722		29.519	10.401		26.845	69.327		25.909	63.277		27.778	10.09		33.725	13.441		34.716	25.751		33.136	58.669		33.428	147.085
	33.765	33.753		32.692	33.708		37.435	15.711		33.777	22.77		33.052	25.224		33.04	14.95		31.492	10.994		27.349	3637.97		25.941	32.391		28.198	625.954		33.753	18.85		34.744	15.473		33.156	48.137		33.444	114.449
	33.797	33.777		32.704	44.549		37.463	16.958		33.797	18.662		33.072	14.61		33.092	18.177		32.201	14.36		27.621	104.406		25.977	51.515		28.902	58.185		33.769	12.889		34.78	21.241		33.184	85.038		33.468	117.039
	33.825	33.805		32.732	33.477					33.817	46.864		33.108	11.575		33.116	16.701		32.625	28.115		27.737	18.257		26.021	12.6		30.071	15.552		33.841	14.98		34.884	26.678		33.192	58.467		33.48	121.213
	33.873	33.861		32.748	52.575					33.861	23.33		33.208	10.531		33.136	17.334		32.793	10.833		28.198	600.894		26.073	45.756		30.579	10.584		33.897	17.54		35	31.787		33.212	59.749		33.516	177.738
	34.129	34.117		32.776	29.671					33.877	26.48		33.224	11.215		33.156	20.941		32.829	16.921		28.902	70.78		26.253	12171.4		31.052	15.426		33.941	10.171		35.081	28.162		33.252	165.821		33.528	104.777
	34.145	34.141		32.792	30.502					33.909	42.795		33.308	17.151		33.192	30.549		32.853	25.581		29.518	18.538		26.385	42.072		31.492	29.927		33.957	11.428		35.14	13.242		33.272	75.589		33.552	134.937
	34.285	34.273		32.816	49.878					33.941	14.599		33.36	18.547		33.212	33.233		32.877	19.466		31.051	12.05		26.421	38.684		31.564	15.405		33.977	18.98		35.172	26.577		33.292	99.099		33.564	106.291
	34.321	34.313		32.832	61.338					33.969	44.548		33.4	13.523		33.232	37.413		32.897	16.027		31.727	10.83		26.457	34.383		31.668	14.418		34.113	19.699		35.301	13.287		33.316	141.722		33.588	134.149
	34.397	34.377		32.856	44.004					34.001	14.081		33.416	13.136		33.268	17.548		32.925	41.377		31.779	14.455		26.481	18.212		31.708	19.527		34.141	17.114		35.425	12.219		33.36	250.7		33.604	107.908
	34.453	34.449		32.9	50.143					34.029	29.851		33.524	19.598		33.28	24.681		32.961	48.362		31.815	12.939		26.549	93.727		31.808	13.606		34.173	13.745		35.461	16.485		33.388	148.733		33.62	80.755
	34.621	34.613		32.916	55.603					34.049	19.442		33.568	24.03		33.32	46.48		33.005	100.624		31.903	20.119		26.617	10735		31.86	15.108		34.289	16.856		35.477	20.996		33.424	273.523		33.644	271.836
	34.653	34.645		32.936	45.349					34.089	24.512		33.584	33.166		33.352	79.399		33.021	32.674		31.995	15.34		26.846	181.487		31.908	18.279		34.313	13.546		35.549	30.729		33.441	143.277		33.668	101.299
	34.669	34.661		32.956	38.231					34.113	22.408		33.616	24.283		33.392	38.393		33.033	47.671		32.063	12.48		26.978	13.355		32.092	14.708		34.329	11.549		35.601	12.451		33.457	114.684		33.684	122.435
	34.753	34.729		32.972	46.352					34.133	14.627		33.636	20.408		33.412	43.301		33.049	45.368		32.183	19.555		27.138	11.062		32.237	10.674		34.353	29.423		35.681	10.302		33.481	144.792		33.744	296.518
	34.769	34.761		33	69.223					34.149	21.526		33.676	24.138		33.432	42.422		33.069	45.16		32.223	22.753		27.346	9649.84		32.289	33.331		34.409	10.091		35.729	27.905		33.509	211.304		33.756	100.805
	34.809	34.797		33.02	82.205					34.173	17.851		33.696	31.14		33.452	32.939		33.081	34.733		32.239	23.188		27.51	35.049		32.329	10.041		34.429	13.329		35.801	37.898		33.553	412.424		33.776	179.067
	34.909	34.893		33.056	60.94					34.205	11.568		33.744	16.738		33.468	50.729		33.113	120.092		32.272	12.678		27.622	98.054		32.381	12.605		34.441	19.877		35.845	36.94		33.577	200.4		33.8	100.599
	35.029	35.009		33.076	53.301					34.221	21.806		33.8	19.015		33.484	52.947		33.129	57.245		32.424	13.697		27.738	156.471		32.417	18.162		34.461	17.673		35.885	17.712		33.601	171.599		33.816	93.38
	35.049	35.041		33.108	94.022					34.241	25.376		33.825	17.654		33.508	24.879		33.149	58.641		32.504	43.426		28.118	13.813		32.445	17.919		34.509	14.485		35.973	13.613		33.621	129.028		33.836	191.89
	35.073	35.061		33.124	44.328					34.265	15.205		33.849	16.143		33.52	36.43		33.181	186.073		32.532	11.495		28.134	17.543		32.493	38.382		34.589	12.716		36.009	29.305		33.645	284.966		33.868	112.224
	35.113	35.081		33.144	54.731					34.281	16.607		33.881	20.588		33.544	56.611		33.233	213.795		32.544	39.444		28.198	4022.5		32.521	41.967		34.738	12.976		36.061	58.175		33.673	88.588		33.888	91.542
	35.181	35.153		33.16	51.063					34.301	14.531		34.109	15.652		33.56	44.698		33.257	80.94		32.568	36.024		28.482	31.509		32.561	19.31		34.934	11.835		36.113	15.947		33.681	89.698		33.9	94.163
	35.309	35.289		33.176	53.88					34.325	23.234		34.157	17.824		33.588	95.975		33.273	83.741		32.592	92.128		28.899	612.401		32.601	41.111		34.97	10.263		36.201	13.269		33.701	150.602		33.916	95.549
	35.341	35.325		33.2	91.787					34.353	12.862		34.293	29.021		33.62	49.059		33.289	132.086		32.628	63.125		29.519	65.527		32.633	16.146		35.006	14.977		36.229	15.111		33.721	238.31		33.932	89.367
	35.465	35.441		33.232	105.56					34.369	15.777		34.333	21.208		33.652	49.791		33.317	111.162		32.648	59.793		30.079	11.732		32.685	24.604		35.05	14.492		36.265	22.288		33.753	171.667		33.956	201.726
	35.57	35.554		33.272	110.768					34.393	17.023		34.465	18.688		33.688	90.836		33.337	113.337		32.668	62.213		30.584	11.226		32.721	17.092		35.126	11.092		36.329	24.28		33.777	226.933		33.988	156.46
	35.67	35.65		33.288	57.957					34.637	16.492		34.497	17.555		33.716	48.234		33.365	171.98		32.68	47.586		30.968	12.167		32.765	35.847		35.202	16.394		36.405	16.452		33.805	113.306		34.008	67.381
	35.794	35.786		33.32	180.041					34.697	16.006		34.521	11.68		33.749	40.234		33.381	128.253		32.708	76.466		31.052	14.538		32.797	27.235		35.226	12.4		36.465	39.329		33.829	284.572		34.024	88.293
	35.906	35.886		33.348	55.757					34.729	10.884		34.641	15.632		33.76	23.052		33.405	103.315		32.728	63.153		31.492	17.776		32.873	27.591		35.326	26.966		36.521	35.414		33.857	82.377		34.052	219.582
	35.926	35.914		33.376	107.265					34.753	10.112		34.781	14.892		33.792	48.551		33.425	158.288		32.748	82.102		31.6	12.202		32.901	12.243		35.366	20.107		36.605	24.065		33.869	104.839		34.092	146.98
	36.018	35.998		33.428	235.205					34.869	11.159		34.845	16.021		33.808	24.242		33.441	134.807		32.764	42.281		31.636	11.315		32.921	12.806		35.386	12.333		36.666	50.906		33.885	123.847		34.112	98.623
	36.046	36.034		33.464	120.615					35.053	16.725		34.905	20.462		33.836	39.855		33.469	164.548		32.784	55.883		31.7	15.398		32.977	14.853		35.422	14.606		36.71	44.437		33.909	172.434		34.132	181.88
	36.262	36.25		33.476	75.389					35.089	11.989		34.921	15.236		33.861	23.268		33.489	146.245		32.804	79.036		31.728	24.961		32.997	44.899		35.474	15.266		36.766	20.693		33.937	100.028		34.172	112.373
	36.538	36.526		33.496	91.394					35.129	11.505		34.997	16.479		33.889	26.777		33.513	178.435		32.816	47.227		31.744	18.337		33.081	92.849		35.498	15.715		36.794	12.504		33.949	187.725		34.196	209.052
	36.682	36.67		33.516	70.477					35.309	10.08		35.025	14.206		33.913	21.053		33.533	151.841		32.836	110.529		31.785	53.597		33.113	77.294		35.526	15.913		36.834	29.986		33.985	108.508		34.236	110.62
	36.814	36.794		33.536	71.834					35.482	24.672		35.057	15.097		33.933	17.155		33.557	222.109		32.868	96.381		31.804	26.036		33.133	43.797		35.69	12.575		36.886	28.339		34.005	134.954		34.256	53.972
	36.918	36.902		33.548	96.752					35.69	14.297		35.089	11.876		33.969	29.956		33.585	189.949		32.888	88.726		31.82	38.356		33.189	98.622		35.714	20.766		36.922	19.696		34.033	233.221		34.268	72.358
	36.942	36.934		33.56	93.7					35.862	10.841		35.121	11.547		34.149	13.621		33.605	160.16		32.908	45.948		31.836	39.163		33.205	66.018		35.762	12.508		36.954	15.604		34.077	99.763		34.284	106.416
	36.966	36.958		33.588	92.023					35.882	15.209		35.297	11.319		34.289	16.241		33.633	284.466		32.924	110.933		31.853	23.585		33.237	76.54		35.81	14.573		37.042	29.427		34.089	41.492		34.308	85.502
	36.99	36.978		33.6	55.146					35.926	12.733		35.333	13.439		34.321	12.489		33.661	125.23		32.948	45.639		31.877	45.821		33.269	67.353		35.834	23.127		37.154	46.628		34.101	80.178		34.34	161.662
	37.01	36.999		33.612	55.066					35.95	11.456		35.385	10.676		34.377	24.427		33.669	93.289		32.968	92.468		31.908	147.945		33.297	105.29		36.006	15.084		37.186	28.074		34.117	71.316		34.368	62.536
	37.027	37.018		33.624	140.633					36.182	17.76		35.409	12.994		34.425	13.954		33.693	271.044		32.984	87.079		31.94	63.937		33.321	211.437		36.034	14.043		37.226	11.825		34.137	91.748		34.388	94.406
	37.054	37.038		33.66	98.551					36.254	17.399		35.465	17.329		34.485	14.472		33.725	180.542		33.012	75.332		31.961	81.581		33.397	161.784		36.214	16.168		37.294	18.187		34.149	68.364		34.408	90.485
	37.095	37.075		33.68	74.404					36.266	13.991		35.489	11.683		34.553	11.672		33.746	205.451		33.028	46.433		31.993	112.207		33.425	138.769		36.234	11.673		37.466	42.388		34.173	114.796		34.444	96.419
	37.118	37.099		33.7	78.502					36.346	17.867		35.522	12.693		34.653	12.804		33.774	116.289		33.048	91.106		32.017	103.502		33.469	228.477		36.278	19.917					34.193	59.904		34.468	82.863
	37.135	37.131		33.728	50.02					36.414	17.375		35.554	19.155		34.745	12.503		33.794	174.81		33.084	178.222		32.033	71.962		33.505	109.078		36.426	16.981					34.217	76.953		34.484	43.133
	37.179	37.171		33.744	44.765					36.502	13.496		35.694	18.599		34.765	15.186		33.814	139.973		33.12	138.336		32.077	210.681		33.525	163.642		36.454	26.073					34.233	80.534		34.497	69.372
	37.235	37.223		33.756	54.223					36.742	14.69		35.854	15.455		34.821	21.713		33.854	213.922		33.144	35.941		32.129	287.844		33.561	145.4		36.49	16.652					34.253	87.388		34.537	178.444
	37.251	37.243		33.796	78.907					36.89	20.166		35.89	10.67		34.857	18.391		33.874	160.085		33.164	72.092		32.157	205.57		33.581	121.794		36.502	12.151					34.277	74.476		34.569	62.54
	37.267	37.259		33.82	43.152					36.902	16.283		35.934	18.305		34.957	15.2		33.886	104.231		33.176	71.586		32.177	103.538		33.609	126.34		36.526	15.718					34.297	57.169		34.589	76.833
	37.319	37.307		33.828	31.815					36.93	26.087		36.066	16.568		35.017	21.096		33.902	77.029		33.204	64.504		32.213	257.059		33.629	78.109		36.551	15.11					34.313	53.381		34.613	53.4
	37.339	37.331		33.844	27.176					36.95	28.65		36.114	10.199		35.049	19.153		33.922	129.177		33.236	124.119		32.257	392.387		33.641	85.457		36.575	14.048					34.333	104.78		34.629	63.151
	37.403	37.395		33.86	15.998					37.018	14.619		36.15	21.922		35.146	17.663		33.934	100.462		33.26	82.254		32.309	413.375		33.669	67.543		36.635	32.069					34.365	73.126		34.649	65.222
				33.884	28.583					37.046	21.197		36.202	14.175		35.222	12.702		33.97	251.55		33.284	60.427		32.321	201.125		33.689	107.633		36.675	11.952					34.393	54.885		34.673	63.072
				33.904	12.863					37.102	11.519		36.226	11.01		35.246	14.717		33.99	97.542		33.308	98.889		32.345	171.474		33.709	186.933		36.723	18.637					34.409	79.463		34.697	37.784
				33.92	11.299					37.126	13.543		36.246	15.857		35.298	10.751		34.006	71.761		33.344	100.901		32.377	455.072		33.749	77.855		36.895	13.674					34.449	60.6		34.721	59.445
				34.013	13.066					37.435	19.671		36.286	18.372		35.346	18.016		34.026	170.268		33.368	73.869		32.401	291.758		33.777	81.24		36.919	17.335					34.469	55.086		34.753	117.143
				34.085	13.419					37.467	13.25		36.354	57.193		35.47	18.886		34.05	158.874		33.384	58.917		32.421	201.61		33.813	137.907		36.943	19.756					34.497	36.658		34.781	24.532
				34.105	12.056								36.39	35.598		35.534	16.18		34.074	86.883		33.412	56.119		32.453	372.492		33.841	74.464		36.971	13.49					34.513	48.303		34.793	22.477
				34.133	12.63								36.454	21.708		35.634	14.903		34.094	82.789		33.432	75.398		32.477	386.78		33.861	88.819		37.031	12.198					34.537	42.003		34.817	53.883
				34.209	16.586								36.474	25.892		35.838	18.692		34.11	143.001		33.46	58.138		32.497	291.421		33.905	107.036		37.059	34.013					34.561	32.195		34.841	80.002
				34.237	11.289								36.498	15.495		35.866	11.784		34.142	145.046		33.472	42.445		32.525	435.858		33.929	39.545		37.111	21.271					34.597	33.08		34.869	34.51
				34.269	11.402								36.534	40.307		35.882	12.948		34.17	165.678		33.488	41.878		32.565	1004.98		33.953	48.054		37.139	18.418					34.621	33.362		34.885	36.999
				34.453	14.588								36.562	14.207		35.922	15.631		34.202	122.529		33.5	31.471		32.605	348.049		33.969	44.144		37.167	26.782					34.645	14.768		34.901	30.528
				34.549	11.229								36.578	45.028		35.954	16.474		34.222	55.533		33.516	47.029		32.617	558.035		33.997	32.964		37.199	14.614					34.661	30.643		34.925	57.537
				34.681	20.895								36.63	17.328		36.066	13.582		34.238	93.46		33.536	29.888		32.657	276.056		34.029	77.246		37.211	10.446					34.721	11.861		34.957	60.329
				34.713	13.044								36.67	33.233		36.098	13.803		34.254	170.48		33.56	51.114		32.673	284.81		34.066	28.162		37.275	17.484					34.793	10.411		34.993	43.697
				34.729	11.222								36.734	22.866		36.146	10.703		34.294	125.744		33.588	57.131		32.685	435.29		34.098	26.038		37.299	17.811					34.805	20.107		35.005	28.695
				34.749	10.083								36.794	17.315		36.178	26.597		34.322	84.284		33.604	18.043		32.713	356.14		34.114	28.273		37.327	14.871					34.861	14.049		35.025	24.076
				34.957	13.459								36.846	20.788		36.222	27.157		34.338	86.193		33.624	29.526		32.733	287.092		34.15	56.606		37.427	10.021					34.921	11.658		35.041	34.55
				34.985	17.244								36.866	12.908		36.41	19.919		34.358	63.554		33.652	21.464		32.749	371.766		34.25	19.07		37.487	10.631					34.937	14.509		35.069	25.293
				35.005	12.527								36.906	10.551		36.434	13.813		34.382	115.16		33.728	13.296		32.773	732.582		34.278	15.298								34.989	18.065		35.085	29.288
				35.029	14.04								37.034	32.026		36.47	10.741		34.406	132.635		33.744	12.297		32.805	221.055		34.37	13.339								35.001	10.746		35.105	19.982
				35.309	20.238								37.078	30.523		36.482	13.069		34.43	61.495		33.764	32.866		32.821	297.786		34.446	38.335								35.065	24.624		35.137	25.631
				35.337	10.201								37.179	21.836		36.526	14.145		34.446	44.189		33.784	22.641		32.833	448.105		34.466	16.72								35.089	17.592		35.157	18.694
				35.449	13.638								37.239	13.116		36.606	12.046		34.466	77.062		33.8	14.243		32.853	294.797		34.59	10.118								35.174	20.324		35.189	17.472
				35.473	20.672								37.287	15.209		36.63	20.715		34.478	47.053		33.868	41.141		32.877	370.19		34.638	21.748								35.19	23.935		35.205	11.251
				35.489	16.637								37.319	20.219		36.67	13.097		34.494	57.686		33.9	44.561		32.909	445.385		34.666	13.666								35.222	30.302		35.217	12.403
				35.509	13.094								37.347	12.49		36.69	12.887		34.51	53.498		33.932	26.498		32.921	527.344		34.69	21.156								35.262	14.2		35.381	13.684
				35.525	10.955								37.427	12.367		36.734	11.32		34.526	68.832		33.948	18.353		32.949	602.552		34.71	11.064								35.286	10.007		35.401	11.532
				35.557	11.614								37.447	11.853		36.762	10.095		34.546	55.559		33.976	48.374		32.985	443.817		34.762	12.452								35.31	12.334		35.453	15.038
				35.581	11.354											36.778	17.353		34.562	52.674		33.992	16.602		33.001	293.394		34.79	11.066								35.35	11.748		35.649	16.155
				35.657	26.342											36.806	16.8		34.578	72.224		34.008	27.564		33.013	219.69		34.838	39.267								35.366	15.736		35.717	15.984
				35.693	32.702											36.838	10.96		34.606	58.078		34.024	48.3		33.037	454.584		34.874	22.843								35.378	35.511		35.737	10.792
				35.721	11.119											36.883	19.551		34.634	98.359		34.052	54.99		33.061	459.901		34.95	11.405								35.422	43.393		35.769	13.594
				35.926	10.428											36.919	10.329		34.654	52.631		34.08	44.248		33.085	445.444		34.986	29.672								35.434	33.933		35.897	23.145
				36.142	14.892											36.938	12.098		34.682	65.262		34.097	54.855		33.109	367.332		35.022	13.983								35.462	79.79		35.945	14.512
				36.162	12.864											37.127	12.593		34.698	78.764		34.121	61.565		33.121	292.337		35.042	31.371								35.486	54.284		35.981	14.87
				36.242	13.356											37.199	11.883		34.73	75.21		34.157	78.806		33.141	823.413		35.07	15.318								35.514	116.311		36.013	18.08
				36.27	24.527											37.227	10.04		34.754	36.409		34.176	84.829		33.185	519.796		35.114	13.619								35.538	101.9		36.041	29.912
				36.322	11.925											37.283	23.029		34.766	69.911		34.213	46.528		33.209	516.136		35.138	15.215								35.578	103.682		36.065	29.905
				36.334	15.296											37.367	13.541		34.802	41.625		34.225	48.691		33.237	428.035		35.174	25.884								35.602	87.137		36.101	15.651
				36.378	11.846											37.415	13.643		34.826	78.874		34.249	84.457		33.269	354.501		35.194	20.751								35.638	104.374		36.23	14.306
				36.51	11.622											37.435	19.511		34.866	37.061		34.269	71.564		33.289	603.535		35.234	53.021								35.666	45.583		36.274	16.543
				36.642	11.072											37.483	15.657		34.886	40.514		34.293	70.076		33.317	368.645		35.278	32.846								35.69	88.323		36.298	29.605
				36.674	22.272														34.898	39.754		34.301	59.021		33.345	668.58		35.326	60.32								35.706	66.282		36.378	17.54
				36.702	16.675														34.922	39.663		34.329	111.729		33.373	371.433		35.338	28.236								35.734	55.62		36.406	25.372
				36.718	14.408														34.938	28.142		34.357	76.644		33.385	224.223		35.382	40.581								35.754	45.993		36.434	16.569
				36.762	24.299														34.958	25.534		34.373	106.337		33.417	755.057		35.438	48.729								35.77	31.259		36.45	15.21
				36.798	10.915														34.966	28.442		34.425	213.541		33.442	370.457		35.454	19.702								35.782	27.774		36.506	52.009
				36.822	11.423														34.986	40.277		34.457	63.752		33.457	218.468		35.478	26.093								35.798	59.397		36.53	16.031
				36.862	27.886														35.01	44.033		34.477	79.22		33.469	363.064		35.506	23.628								35.83	45.003		36.554	16.896
				36.93	12.081														35.038	50.852		34.505	121.55		33.497	373.106		35.538	41.769								35.846	46.591		36.594	14.052
				36.974	17.171														35.078	22.609		34.525	45.492		33.514	596.827		35.582	13.037								35.89	72.44		36.67	16.692
				37.19	13.499														35.094	24.331		34.537	60.323		33.554	719.753		35.638	23.918								35.914	45.202		36.702	26.704
				37.31	20.712														35.118	26.671		34.553	55.402		33.59	509.724		35.666	30.403								35.942	40.804		36.734	14.502
				37.394	13.214														35.151	17.286		34.573	72.303		33.618	356.532		35.69	29.894								35.97	42.445		36.746	16.492
				37.418	14.693														35.162	12.009		34.601	119.344		33.638	480.493		35.714	20.281								35.986	17.749		36.79	14.486
				37.459	14.347														35.195	17.738		34.621	55.655		33.662	525.557		35.746	77.183								36.01	40.058		36.93	10.369
																			35.227	20.595		34.641	106.482		33.694	251.976		35.794	10.867								36.038	20.488		36.95	18.326
																			35.247	12.168		34.665	92.268		33.714	318.789		35.806	20.084								36.07	36.029		36.974	13.292
																			35.287	15.411		34.697	61.837		33.73	303.08		35.851	31.98								36.09	28.055		37.13	14.851
																			35.563	10.624		34.721	79.533		33.75	182.358		35.903	24.408								36.122	14.426		37.19	14.982
																			35.607	15.365		34.733	76.6		33.766	307.405		35.939	11.083								36.158	15.51		37.198	10.082
																			35.619	12.812		34.765	64.379		33.782	236.671		35.959	13.622								36.23	12.181		37.222	16.4
																			35.643	11.083		34.777	51.872		33.798	338.938		35.995	26.675								36.262	17.491		37.338	14.24
																			35.679	27.003		34.793	72.967		33.826	226.303		36.015	15.65								36.282	13.953		37.354	19.531
																			35.759	14.897		34.829	80.02		33.838	277.701		36.031	10.095								36.318	14.821
																			35.775	13.863		34.849	64.616		33.858	214.626		36.059	20.786								36.342	21.166
																			35.795	15.115		34.865	49.186		33.87	209.42		36.095	22.136								36.394	23.54
																			35.819	24.567		34.881	78.221		33.894	310.837		36.187	38.106								36.51	18.852
																			35.843	14.491		34.917	70.278		33.91	294.772		36.243	35.053								36.526	12.796
																			35.855	15.943		34.933	51.854		33.934	185.019		36.275	11.601								36.542	12.604
																			35.879	10.424		34.961	67.498		33.954	279.882		36.331	20.543								36.562	19.326
																			35.907	16.395		34.977	104.512		33.978	358.32		36.359	17.731								36.598	14.767
																			35.931	23.487		35.013	52.056		34.006	164.284		36.383	11.183								36.622	20.918
																			36.007	19.889		35.037	48.514		34.03	245.649		36.431	16.762								36.714	16.084
																			36.031	17.992		35.065	93.224		34.05	195.392		36.495	13.852								36.726	22.513
																			36.063	18.309		35.097	40.928		34.082	340.886		36.519	11.501								36.77	23.772
																			36.107	16.29		35.133	110.202		34.106	137.351		36.551	12.691								36.778	22.531
																			36.263	18.842		35.169	44.728		34.126	268.348		36.611	24.333								36.81	55.794
																			36.287	11.548		35.181	37.138		34.162	354.288		36.635	23.017								36.838	48.443
																			36.299	14.634		35.197	31.145		34.202	150.339		36.675	25.201								36.886	18.397
																			36.335	13.788		35.229	47.029		34.222	142.099		36.703	11.209								36.906	30.366
																			36.363	24.479		35.241	22.773		34.238	210.819		36.719	11.312								36.922	28.697
																			36.391	15.498		35.249	28.578		34.278	170.834		36.843	20.079								36.954	43.79
																			36.411	12.165		35.269	24.563		34.302	84.523		36.883	14.361								36.974	16.747
																			36.427	14.39		35.281	26.382		34.33	257.062		36.919	14.458								36.994	18.418
																			36.451	25.114		35.325	101.512		34.358	52.882		36.971	44.958								37.006	28.891
																			36.467	12.119		35.353	30.454		34.374	86.079		37.015	23.309								37.034	32.187
																			36.519	10.058		35.373	37.421		34.398	83.387		37.027	29.627								37.062	15.769
																			36.575	10.338		35.389	26.345		34.414	63.085		37.079	15.219								37.086	54.59
																			36.591	13.594		35.401	26.629		34.434	73.721		37.159	17.761								37.126	41.327
																			36.839	21.496		35.425	28.414		34.458	117.608		37.219	10.388								37.154	19.849
																			36.94	15.979		35.437	18.403		34.486	59.613		37.255	22.778								37.187	24.549
																			36.984	13.323		35.453	22.526		34.51	66.422		37.327	13.334								37.198	19.838
																			37.08	13.586		35.465	63.157		34.55	55.174		37.415	16.775								37.214	18.414
																			37.156	10.47		35.505	50.677		34.578	48.958											37.242	37.862
																			37.18	11.977		35.529	23.949		34.602	29.393											37.271	29.027
																			37.204	14.93		35.553	19.48		34.754	23.454											37.295	18.743
																			37.22	11.349		35.573	64.078		34.79	35.614											37.315	25.044
																			37.256	10.104		35.605	35.351		34.822	34.01											37.339	21.989
																			37.384	11.459		35.621	24.235		34.842	98.452											37.359	28.255
																			37.408	24.387		35.637	26.044		34.874	52.732											37.395	35.109
																			37.436	32.782		35.661	30.382		34.898	37.65											37.415	18.249
																						35.697	22.674		34.922	78.724											37.439	20.188
																						35.709	15.936		34.938	79.101											37.463	35.02
																						35.733	44.091		34.962	41.239
																						35.773	11.978		34.978	77.809
																						35.797	12.395		34.99	48.866
																						35.817	25.027		35.018	126.168
																						35.837	27.846		35.054	225.206
																						35.897	20.864		35.09	133.524
																						35.914	12.542		35.106	58.38
																						35.941	13.86		35.19	24.505
																						35.997	13.324		35.299	13.133
																						36.218	19.414		35.323	27.456
																						36.25	14.062		35.347	24.172
																						36.27	12.745		35.395	10.181
																						36.426	22.954		35.423	11.543
																						36.462	30.278		35.471	21.2
																						36.486	17.37		35.487	12.608
																						36.506	16.963		35.507	18.644
																						36.518	13.974		35.651	19.48
																						36.534	13.457		35.683	17.131
																						36.554	35.462		35.711	27.43
																						36.594	10.663		35.723	18.376
																						36.614	14.797		35.763	24.583
																						36.65	15.718		35.799	19.411
																						36.658	11.696		35.819	15.001
																						36.678	19.61		35.843	12.566
																						36.71	28.848		35.891	25.137
																						36.75	13.338		35.911	23.896
																						36.858	34.324		35.943	16.284
																						36.886	22.918		35.999	16.531
																						36.902	28.388		36.019	15.713
																						36.93	11.429		36.047	17.175
																						36.942	19.575		36.067	13.027
																						36.954	18.26		36.079	14.894
																						36.978	37.39		36.091	21.452
																						37.038	21.658		36.123	10.568
																						37.266	21.712		36.135	12.713
																						37.286	15.741		36.183	18.303
																						37.314	11.026		36.207	14.994
																						37.374	29.2		36.227	14.473
																						37.394	10.36		36.251	26.73
																						37.41	19.324		36.271	14.471
																						37.458	25.61		36.295	25.285
																						37.482	15.881		36.303	19.623
																									36.363	18.965
																									36.419	12.554
																									36.447	28.605
																									36.487	25.442
																									36.503	17.112
																									36.579	12.468
																									36.727	28.758
																									36.783	11.905
																									36.819	17.484
																									36.851	25.594
																									36.867	21.023
																									36.964	22.678
																									37.016	14.79
																									37.044	32.486
																									37.06	15.758
																									37.08	30.91
																									37.116	12.067
																									37.2	10.57
																									37.244	11.587
																									37.272	29.229
																									37.364	19.628
																									37.388	12.513

## Sheet: peaks_focused_quantify
Peak #	~ RT	Identity	mm1			mm2			mm3
1	1.279	CO2	1.287	172.057	0.0503205	1.287	146.628	0.0426595	1.283	125.643	0.0349572
2	1.343	acetaldehyde	1.347	803.748	0.235067	1.343	656.904	0.191118	1.347	111.179	0.0309329
3	1.411	ethanol	1.415	3416	0.999058	1.419	9444.52	2.74776	1.415	13545.6	3.76874
4	1.559	methyl acetate	1.575	45.761	0.0133834	1.575	38.367	0.0111624	1.571	85.828	0.0238796
5	NA	acetic acid
6	NA	2,3butanedione
7	NA	ethyl acetate
8	NA	isobutanol
9	2.904	acetion	2.948	30.917	0.00904211			0	2.94	125.709	0.0349756
10	2.972	propyl acetate	2.988	1695.86	0.495978	2.992	1856.66	0.540171	2.988	1018.29	0.283315
11	3.212	1,3dioxolane,2,4,5trimethyl
12	3.24	acetal			0	3.236	84.163	0.0244861			0
13	3.4	isomayl alcohol	3.396	1843.27	0.53909	3.396	3465.12	1.00813	3.396	9163.08	2.54941
14	3.46	1methyl2butanol	3.472	688.341	0.201315	3.476	3060.61	0.890444	3.472	7744.83	2.15482
15	3.776	? (acid)
16	4.285	isobutyl acetae	4.309	2677.7	0.783132	4.316	580.125	0.16878	4.316	186.373	0.0518539
17	4.75	? (acid)
18	8.563	isoamyl acetate	8.623	20225.9	5.91533	8.611	4293.71	1.2492	8.623	39658.9	11.0342
19	8.663	2methylbutyl acetate	8.687	27361.6	8.00228	8.687	8191.99	2.38335	8.711	3250.2	0.904293
20	23.378	benzeneethanol	23.379	13987.5	4.09083	23.411	502.422	0.146173	23.399	1781.08	0.495543
21	24.743	?
22	24.839	?
23	25.183	octanoic acid	25.124	19.673	0.00575364	25.117	57.979	0.0168682	25.176	23.267	0.0064735
24	25.82	2phenethyl acetate	25.812	5608.31	1.64023	25.817	989.324	0.287831	25.825	310.639	0.086428
25	26.968	decanoic acid				26.978	13.355
26	28.065	ethyl laurate				28.118	13.813
INTERNAL	18.067	internal standard (cineole)	18.1	3419.22		18.1	3437.17		18.1	3594.19
